# Supplementary material
Source: PubMed Central journal article supplement (PMC3204392)
Supplement: NIHMS324157-supplement-supplement_1.pdf [file NIHMS324157-supplement-supplement_1.pdf]

Corrected 1 July 2011; see below

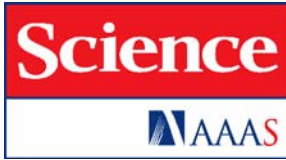

[www.sciencemag.org/cgi/content/full/science.1207018/DC1](http://www.sciencemag.org/cgi/content/full/science.1207018/DC1)

## Supporting Online Material for

### **Widespread RNA and DNA Sequence Differences in the Human Transcriptome**

Mingyao Li, Isabel X. Wang, Yun Li, Alan Bruzel, Allison L. Richards, Jonathan M. Toung, Vivian G. Cheung\*

\*To whom correspondence should be addressed. E-mail: [vcheung@mail.med.upenn.edu](mailto:vcheung@mail.med.upenn.edu)

Published 19 May 2011 on *Science Express*

DOI: 10.1126/science.1207018

#### **This PDF file includes:**

Materials and Methods  
Figs. S1 to S5  
Tables S1 to S10  
References

**Correction:** The numbering of references and their citations has been corrected.

## SUPPLEMENTAL ONLINE MATERIAL

### Widespread RNA and DNA Sequence Differences in the Human Transcriptome

Mingyao Li, Isabel X. Wang, Yun Li, Alan Bruzel, Allison L. Richards, Jonathan M. Toung, Vivian G. Cheung

#### Table of content

|                                                                                                                      |           |
|----------------------------------------------------------------------------------------------------------------------|-----------|
| 1. Figure 1. Flowchart of analysis                                                                                   | p. 2-3    |
| 2. Figure 2. Comparison of editing levels for A-to-G sites in our and Church studies                                 | p. 4      |
| 3. Figure 3. Examples of RDD sites by Sanger Sequencing                                                              | p. 5      |
| 4. Figure 4. Comparison of the number of events per individual by SNPs and by monomorphic sites                      | p. 6      |
| 5. Figure 5. Editing/ RDD levels by frequency                                                                        | p. 7      |
| 6. Results from comparison of RDD sites obtained from our RNA-Seq reads and those from Dermitzakis's and colleagues. | p. 8      |
| 7. Sequencing errors and coverage do not contribute to individual differences in number of RNA editing/ RDD events   | p. 9      |
| 8. Material and Methods                                                                                              | p. 10-13  |
| 9. Table 1. Information on the 27 subjects in our study                                                              | p. 14     |
| 10. Table 2. Sequences corresponding to RDD sites translated to peptides                                             | p. 15     |
| 11. Table 3. EST clones that contain RDD alleles                                                                     | p.16-18   |
| 12. Table 4. DNA and RNA-forms of peptides at RDD sites (cancer cells)                                               | p. 19     |
| 13. Table 5. DNA and RNA forms of peptides at RDD sites (B-cells)                                                    | p. 20-26  |
| 14. Table 6. Gene Ontology Analysis of RDD containing genes                                                          | p. 27     |
| 15. Table 7. Distribution of RDD sites across different genic regions                                                | p. 28     |
| 16. Table 8. Primers used in Sanger sequencing                                                                       | p. 29-30  |
| 17. Table 9. Detailed information on peptides from mass spec                                                         | p. 31-40  |
| 18. Table 10. Description of the 10,210 RDD sites                                                                    | p. 41-147 |
| 19. References                                                                                                       | p. 148    |

Supplementary Figure 1A. Flowchart of analysis

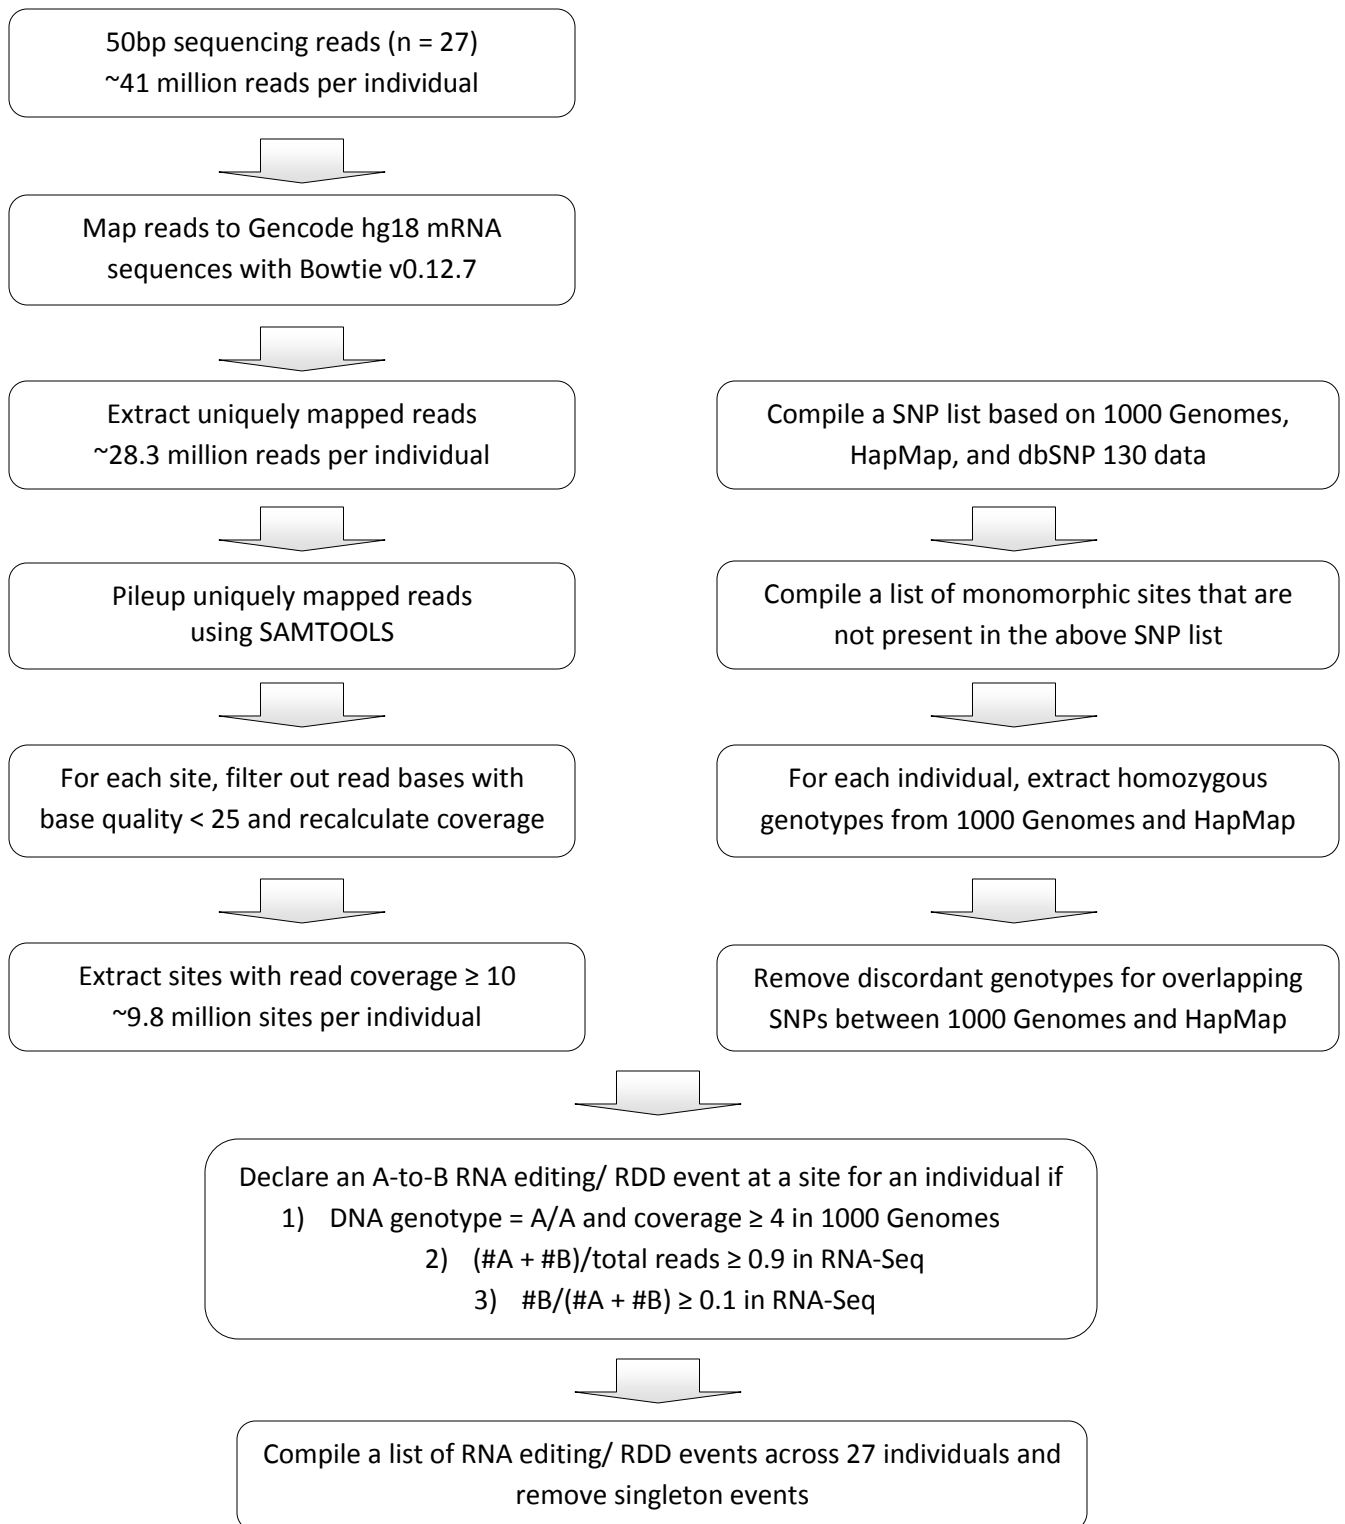

Figure 1B. Different data generated and analyses conducted in this study.

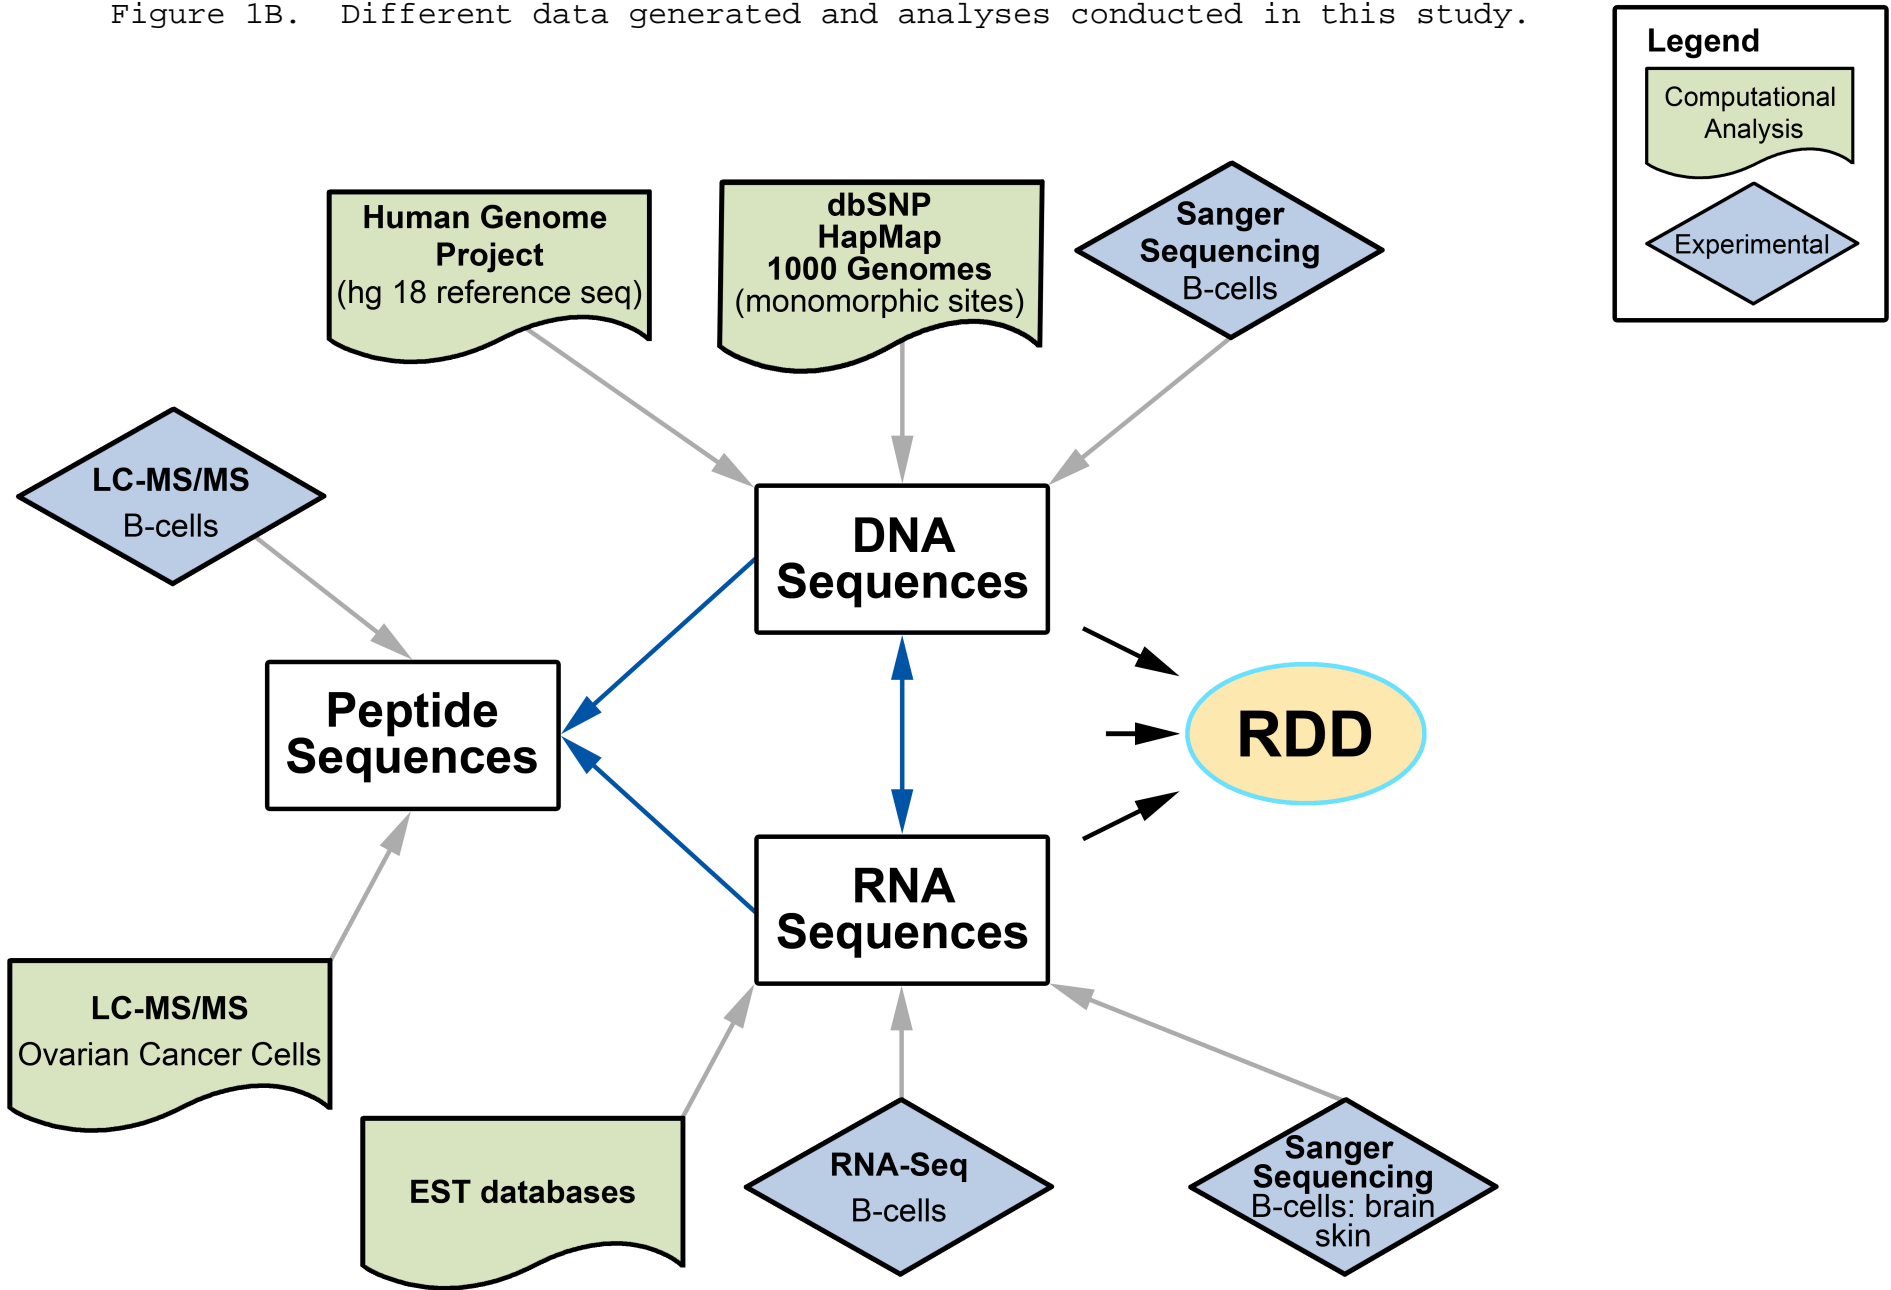

Fig. S2. Comparison of A-to-G levels in B-Cells (this study) and those in other cell types collected by G. Church's group

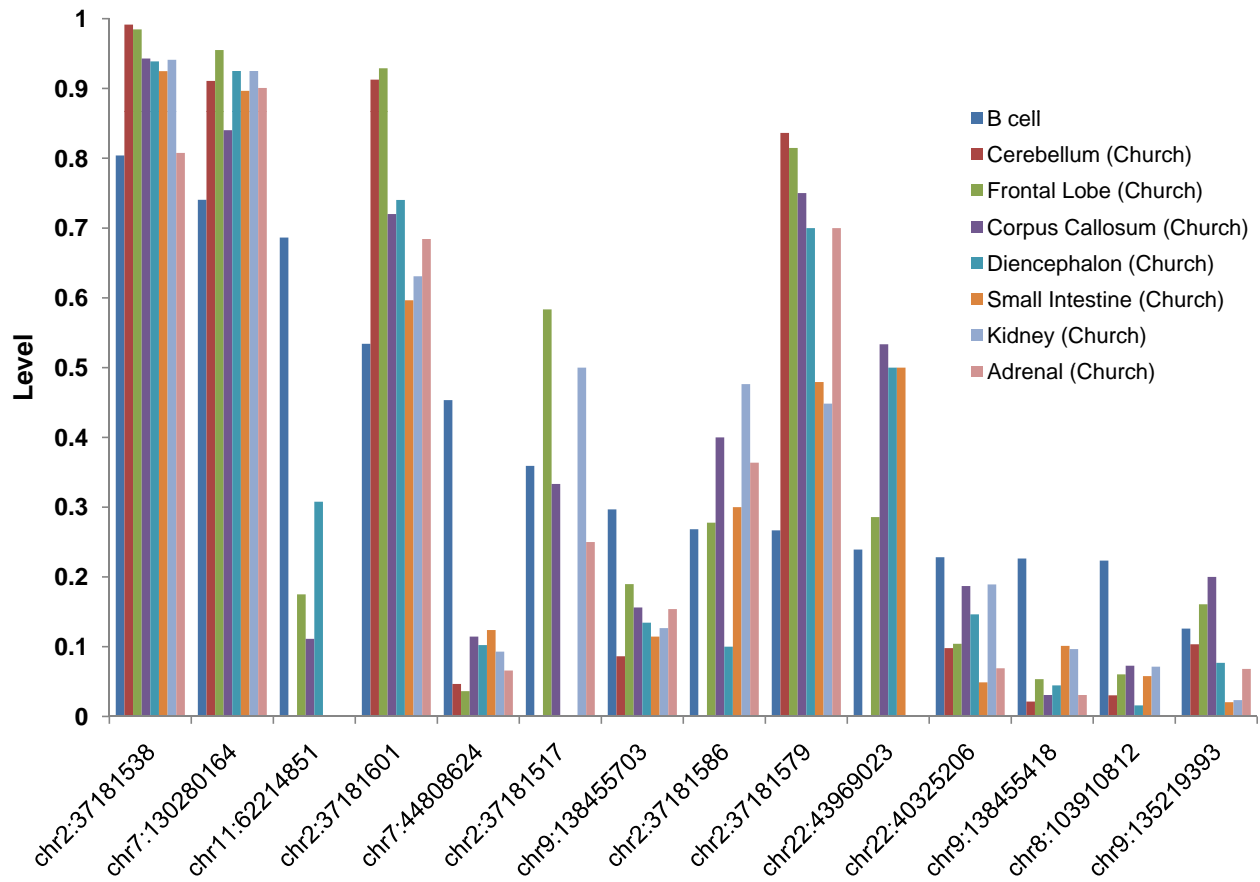

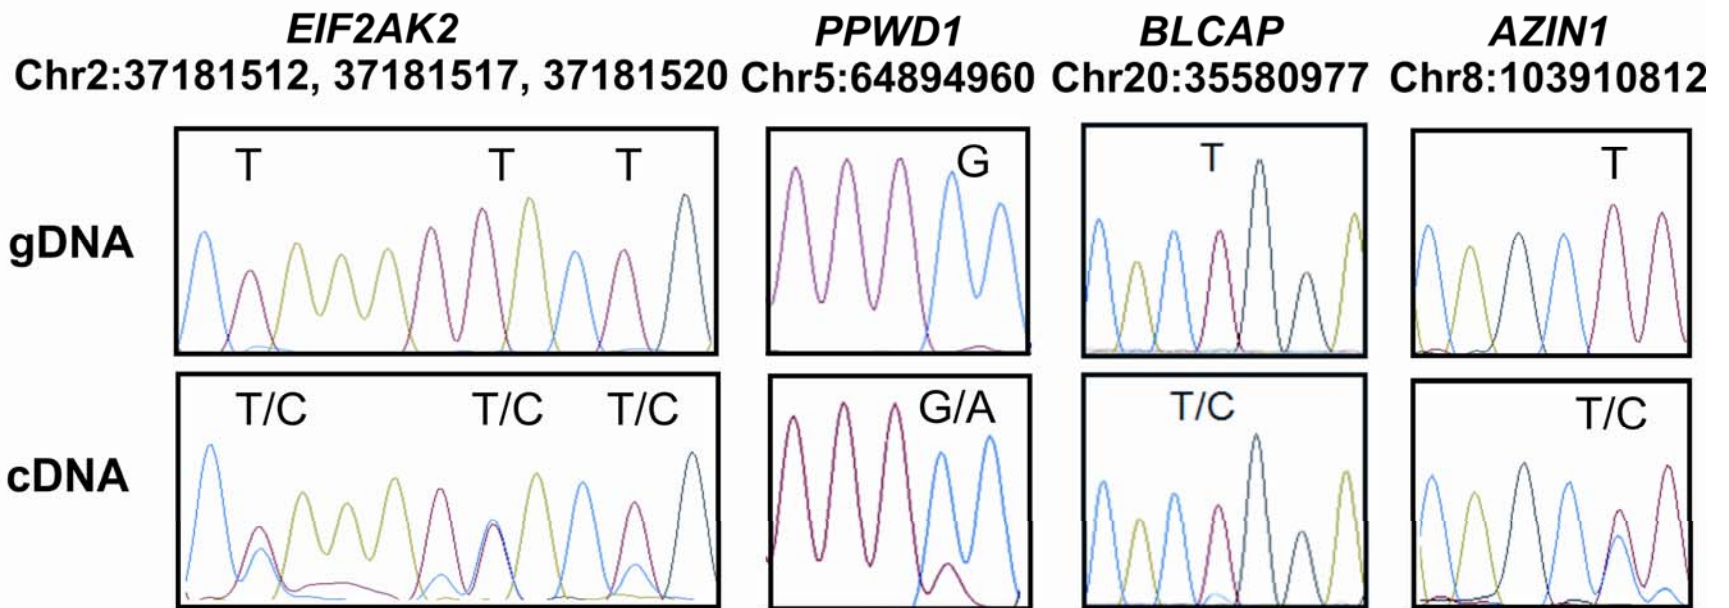

Figure S3. Examples of RDD sites by Sanger sequencing. Sequences of matched DNA and RNA sequences from cultured B-cells for four genes are shown. Each matched pair of DNA and RNA sequences was from the same individual. The reverse strand of *EIF2AK2*, *AZIN1* and *BLCAP* was sequenced. Locations of the sites are based on hg18 build of the human genome.

Fig. S4. Comparison of the number of RDD events per individual by SNPs and monomorphic sites.

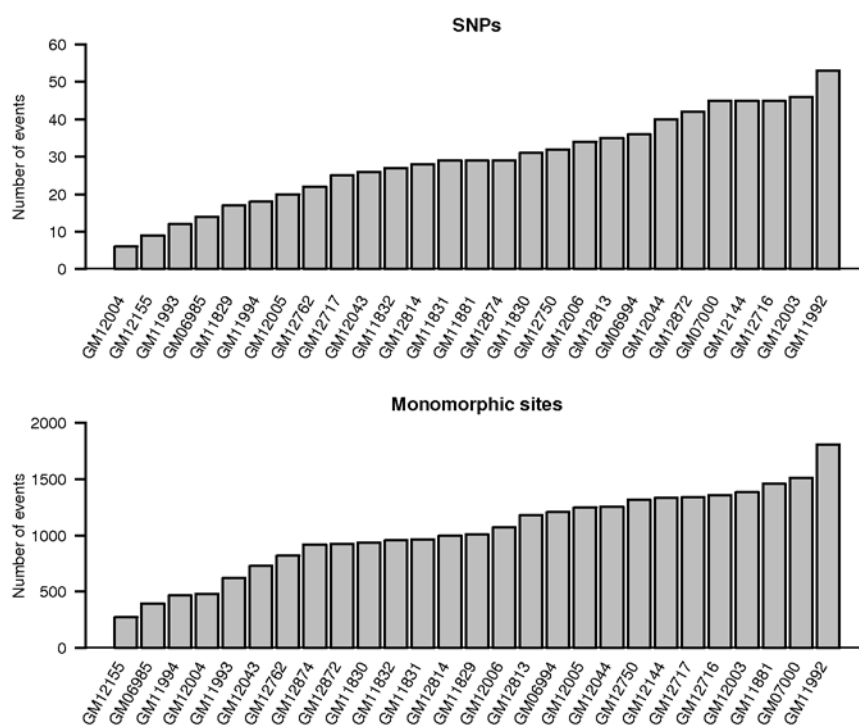

Fig. S5. Editing and RDD levels by frequency.

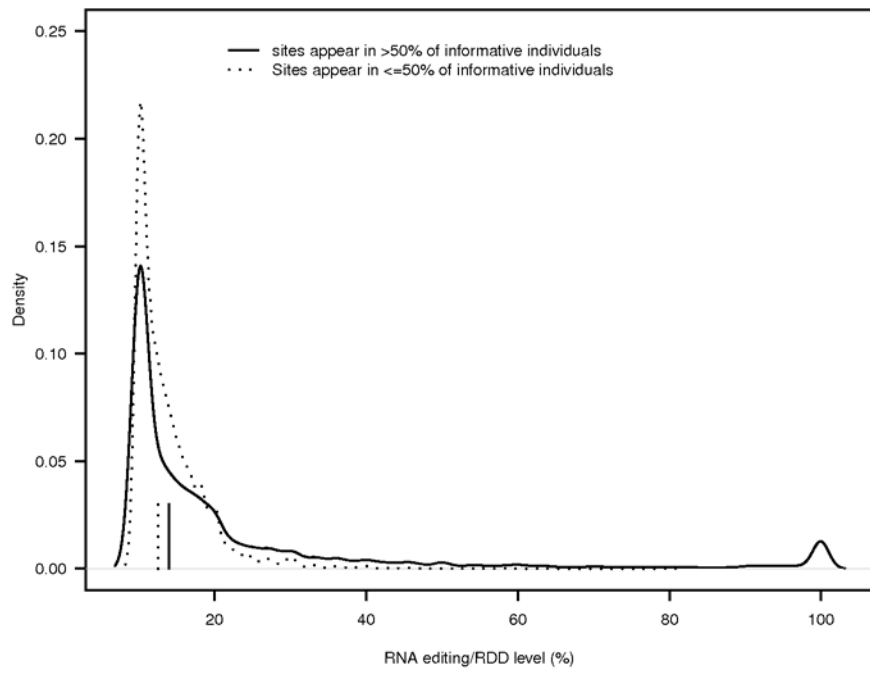



Comparison of our analysis using our RNA-Seq data and those previously generated (26):

Instead of aligning our sequence reads to Gencode regions of the reference human genome. We aligned the sequences to the entire reference genome. For that analysis, we required each site to be covered by 20 or more reads and a RDD site is called only if 20% or more of the reads cover a site that differs from the DNA sequence. With these criteria, among the 27 subjects, we identified 101,574 events where the RNA sequences do not match those of the corresponding DNA sequences in our 27 subjects. These events are found in 20,753 sites in the human genome and reside in 4,507 known genes.

Independently, Dermitzakis and colleagues have performed RNA-sequencing on the same set of CEPH individuals (26). This provides an opportunity to validate our findings on a genome scale. We took their RNA-Seq data and used the same analysis pipeline to identify RDD sites. They did not sequence the samples as deeply as we did (0.7 Gb vs 2 Gb per sample) so we could not compare all the sites. However, we were able to compare a large number of sites; among the 101,574 events identified in our data, 19,243 events have coverage  $\geq 20$  in the Dermitzakis's dataset. Among these events, 17,100 (89%) showed identical RNA-DNA differences as in our dataset. Because we applied a stringent requirement that 20% or more of the RNA-Sequencing reads has to differ from the DNA to call a site, the 89% concordance with Dermitzakis's data is likely an underestimate. The results are encouraging since the RNA-Seq data were generated by two labs independently, yet the findings are highly concordant.

Sequence errors or coverage do not contribute to individual differences in number of RDD events:

One concern with these individual differences is sequencing errors particularly for those monomorphic sites since subjects in the 1000 Genomes Project were sequenced at low depth. To eliminate such a possibility, we compared the number of events between SNPs and monomorphic sites found in each individual and observed similar patterns (Spearman correlation = 0.74,  $P < 10^{-7}$ ; Fig. S4). We have confidence in the SNP genotypes because the genotypes from the 1000 Genomes Project were based on consensus calls using three different genotype calling algorithms<sup>19</sup> and for SNPs that were found in the 1000 Genomes and the HapMap Projects, we considered only those with concordant genotypes. The similar patterns between SNPs and monomorphic sites provide reassuring evidence that genotyping errors are unlikely to explain the variability among individuals. Another concern with the individual variation in the number of events is that the RNAs of different individuals were sequenced at different depths. To evaluate the potential impact of sequencing depth, we fitted a linear model with the number of events as the outcome variable and the number of bases covered by 10 or more reads as independent variable and found that the number of events and sequencing depth are not dependent ( $P = 0.51$ ), suggesting that the variability is not due to variation in coverage. Similarly, the depth of DNA sequences from 1000 Genomes cannot explain the individual differences in the number of RDD events ( $P = 0.12$ ). These analyses suggest that the individual variation in the number of editing and RDD events has a biological basis.

## MATERIALS AND METHODS

### MATERIALS AND METHODS

#### Study samples

We used data generated by sequencing RNA from 27 cultured B-cell lines obtained from Coriell (Camden, NJ, USA). These cell lines were derived from individuals of European descent from the Utah pedigrees of the CEPH collection which have been extensively genotyped or sequenced by the International HapMap and the 1000 Genomes Projects. All individuals are unrelated. The list of individuals is shown in Table S1. The B-cells were grown to a density of  $5 \times 10^5$  cells/mL in RPMI 1640 supplemented with 15% fetal bovine serum, 100 units/mL penicillin and 100  $\mu$ g/mL streptomycin, and 2 mmol/L L-glutamine.

Foreskin tissues were collected from circumcisions of 10 healthy and unrelated 3-day old newborns (anonymous donors at the Hospital of the University of Pennsylvania). Primary fibroblasts were isolated from these foreskin tissues. Briefly, the tissues were sectioned and the epidermis was removed. The remaining dermis was incubated in 1 ml of 3 mg/ml collagenase (Roche, Indianapolis, IN, USA) in HBSS buffer with calcium and magnesium (Mediatech, Manassas, VA, USA) at 37°C for 30 minutes. 1 ml of 0.5% Trypsin/EDTA (Invitrogen, Carlsbad, CA, USA) was then added and the tissue was incubated at 37°C for 10 minutes. After inactivating trypsin by adding 1 ml MEM medium (Invitrogen) with 10% fetal bovine serum (Hyclone, Logan, UT, USA), undigested tissue pieces were removed and fibroblasts were collected from suspension by centrifugation. Passage-1 fibroblasts were subsequently cultured at 37°C in 5% CO<sub>2</sub> in MEM medium supplemented with 10% fetal bovine serum, 2 mMmol/LL-glutamine, 100 U/mL penicillin and 100  $\mu$ g/ml streptomycin, and were passaged every 3 days.

Human brain tissues were obtained from National Disease Research Interchange. Tissues from cerebral cortex were collected during routine autopsy of cardiac-death donors within 7~12 post-mortem hours. Samples were snap-frozen and kept at -80°C until DNA/RNA extraction. All 10 subjects were Caucasians with age of 43~79 years, including both males and females.

#### Library preparation for Illumina sequencing and sequence alignment

RNA-Seq was performed as recommended by the manufacturer (Illumina, Hayward, CA, USA). Briefly, cells were harvested 24 hours after addition of fresh medium and total RNA was extracted using the RNeasy Mini kit with DNase treatment (Qiagen, Valencia, CA, USA). PolyA mRNA was isolated and fragmented. First strand cDNA was prepared using random hexamers. Following second strand cDNA synthesis, end repair, addition of a single A base, adaptor ligation, agarose gel isolation of ~200 bp cDNA and PCR amplification of the ~200 bp cDNA, the samples were sequenced using the Illumina 1G Genome Analyzer to a coverage of approximately 41 million 50-bp reads per sample. High quality reads were mapped to the Gencode mRNA sequences (build hg18) using program Bowtie (40) (v0.12.7). We used the default settings of Bowtie (allowing up to two mismatches) and then extracted uniquely mapped reads from the obtained SAM file.

#### Identification of RNA editing and RDD events

We required the RNA editing or RDD site to be homozygous in the genomic DNA. Such a site can be either a SNP with homozygous genotype or a monomorphic site (i.e, a site not in dbSNP, and not among SNPs identified by the HapMap and the 1000 Genomes Projects). If it is a SNP, we obtained the corresponding SNP genotypes from the HapMap and the 1000 Genomes Projects. For overlapping SNPs between these two projects, we required the genotypes to be

concordant. If it is a monomorphic site, we assumed all individuals are homozygous for the reference allele in the reference genome. We detected RNA editing or RDD events by comparing genotypes derived from DNA-Seq with those from RNA-Seq on the same individual.

For each individual, an event is declared at a site if 1) the number of uniquely mapped reads in RNA-Seq is  $\geq 10$  and the per-base sequence quality score for each of the covered base is  $\geq 25$ , 2) the number of uniquely mapped reads in DNA-Seq is  $\geq 4$  in the 1000 Genomes Project, 3) the individual's genotype at the site is homozygous, and 4)  $\geq 10\%$  of the mapped reads in RNA-Seq show an allele that differs from the individual's (DNA-level) genotype. We removed all sites that overlap with segmental duplications (defined by <http://humanparalogy.gs.washington.edu/build36/build36.htm>) and repetitive sequences (defined by RepeatMasker).

### EST search

We analyzed those RDD sites where the DNA sequences are monomorphic (not known as SNPs in dbSNP, HapMap or 1000 Genome projects). For each site, we used BLAST to search for sequences corresponding to the RNA-allele and 25 nucleotides up and downstream of that site in human dbEST. An EST is found to contain the RDD allele if its sequence is identical to the RNA-form of the RDD site and there is no more than 1 mismatch (except for known SNPs) to the 51-nucleotide query sequence. The EST must also map to the gene where the RDD was called (the mapping is mostly according to Unigene).

### Validation with Sanger sequencing

To validate whether the sites we identified show RNA and DNA differences and to confirm the RNA editing/ RDD level, we carried out Sanger sequencing. Genomic DNA and total RNA were extracted using the Qiagen AllPrep DNA/RNA kit (with DNase treatment for total RNA) from B-cells and foreskin fibroblast. DNA and RNA from human brain tissues were extracted using Genra Puregene Tissue Kit and RNeasy Lipid Tissue Mini kit (Qiagen), respectively. RNA was converted to single stranded cDNA using TaqMan reverse transcription reagents with oligo d(T) priming (Applied Biosystems, Foster City, CA, USA). PCR products (see Supplementary Table 8 for primer sequences) encompassing putative RNA editing sites were generated from the cDNA and sequenced using BigDye Terminator Cycle Sequencing on a 3730 DNA Analyzer (Applied Biosystems). RNA editing/ RDD sites were validated by visual inspection of sequencing traces independently by at least two individuals.

### Mass spectrometry

*Protein Database with RDD sites:* We made a protein database using Gencode mRNA sequences. For genes that display non-synonymous RDDs, protein forms predicted from both DNA sequences and RNA sequences were included. This database consists of 17,726 protein entries, among which 2,057 proteins contain RDD sites. This allows us to search for spectra of peptides encoded by the DNA and RNA forms of mRNAs simultaneously. Mass spectrometry data were searched against this database using a locally installed version of Mascot search engine (41) (Matrix Science, Boston, MA, USA). In order to evaluate the certainty of search result and false discovery rate, we included a decoy database search. The decoy database contains the reversed amino acid sequences of each protein contained in the original database, thus no true matches should be expected (43). Each dataset was searched against both the original and the

decoy databases, using the same parameters. The false discovery rate (FDR) was determined using the number of the matches from the original database (TP) and those from decoy database ( $FDR = FP / (TP + FP)$ ).

*Ovarian cancer and leukemic cells:* First we mined public databases for large-scale mass spectrometry data on human cells. We found two comprehensive datasets on proteomic profiling of ovarian cancer cells (30) and leukemic cells, K562 (<https://proteomecommons.org/dataset.jsp?i=76466>). The data were downloaded from Proteome commons database. The downloaded m/z XML files were converted to Mascot compatible format using ReAdW (42). We used the following search parameters of Mascot: for the ovarian cancer cells, we used the same parameters as the original study (30): Parent ion  $\Delta$ mass of 4 Da, fragment mass error of 0.4 Da, complete carbaminomethyl modification of cystein, and allow one trypsin miscleavage; for the leukemic cells: parent ion  $\Delta$ mass of 0.3 Da, fragment mass error of 0.5 Da, complete carbaminomethyl modification of cystein and variable N-terminal acetylation and methionine oxidation, allowing up to one trypsin miscleavage (same as B-cells, see below). False discovery rate is <1% (determined by Mascot decoy database search).

*B-cells:* Cultured B-cells from 15 CEPH individuals were cultured as described above for GEL/LC-MS/MS. Equal number of cells from each individual were pooled and lysed in 20 mM Tris HCl pH 8, 137 mM NaCl, 10% glycerol, 1% Nonidet P-40 (NP-40) and 2 mM EDTA. 60  $\mu$ g of total protein was pre-fractionated and digested as described by Beer and colleagues (44). Specifically, the sample of 60  $\mu$ g of total protein was loaded onto a 12% NuPAGE Bis-Tris gel and was run until the dye reached 2 cm from the bottom of the loading well. The gel was stained with Coomassie R250 and destained using methanol and water. The entire lane of protein was sliced into 27 1-mm slices using a razor array. Gel slices were destained in 200  $\mu$ l of 200 mM ammonium bicarbonate and 50% acetonitrile for 30 minutes with shaking at 37°C and then dried in a Speedvac. This was followed by incubation in 100  $\mu$ l of 20 mM TCEP in 25 mM ammonium bicarbonate (pH 8.0) for 15 minutes at 37°C. The supernatant was discarded and 100  $\mu$ l of 40 mM iodoacetamide in 25 mM ammonium bicarbonate (pH 8.0) was added and incubated for 30 minutes at 37°C. The supernatant was again discarded and the gel slices were washed twice with 200  $\mu$ l of 25 mM ammonium bicarbonate in H<sub>2</sub>O and once with 25 mM ammonium bicarbonate in 50% acetonitrile. The gel slices were dried and then rehydrated with 20  $\mu$ l of 0.02  $\mu$ g/ $\mu$ l modified Trypsin (Promega, Madison, WI, USA) in 40 mM ammonium bicarbonate overnight with shaking at 37°C. The supernatant was then transferred to a clean tube and the gel slices were incubated in 20  $\mu$ l of 40 mM ammonium bicarbonate for 30 min at 37°C. The supernatants were combined and 4  $\mu$ l of acetic acid was added. Extracted tryptic peptides were injected onto a nanocapillary reverse-phase column (75  $\mu$ m column terminating in a nanospray 15  $\mu$ m tip) directly coupled to a LTQ-Orbitrap mass spectrometer (Thermo Scientific, Pittsburgh, PA, USA). The MS/MS data was acquired using a top six method. Each fraction of tryptic peptides was injected and analyzed in triplicates to increase the depth of protein detection. The raw spectra files were converted to Mascot compatible format using BioWorks v 3.3.1 (Thermo Scientific, Waltham, MA, USA). We used the same protein database as in the cancer cell analysis described above. The following Mascot search parameters were applied: parent ion  $\Delta$ mass of 0.3 Da, fragment mass error of 0.5 Da, complete carbaminomethyl modification of cystein and variable N-terminal acetylation and methionine oxidation, allowing up to one trypsin

miscleavage. False discovery rate is <1% (determined by Mascot decoy database search); see Table S9 for details on search results.

At FDR <1%, 38,572 unique peptides (from 3,217 proteins) were detected. Among them, 11,496 peptides are from the 659 proteins that contain one or more RDD sites although the RDD-containing peptides were not necessarily detected. Among the 659 proteins, we detected 299 and 28 peptides encoded by the DNA and RNA forms of RDDs (Table S5). As shown in Table 3 of main text, 17 pairs of peptides differ in one residue that corresponded to the RNA and DNA variants at RDD sites. A RDD site in RPL28 led to a loss of a STOP codon and resulted in a larger protein with additional amino acids. We carried out BLAST search and ensured that all 28 peptides that correspond to the RNA forms of the RDD-containing peptides are unique to the proteins of interests. For these alignments, we used “nr” to search all nonredundant sequences (which includes CDS translations+PDB+SwissProt+PIR+PRF). All 28 RDD sites correspond to monomorphic sites; by Sanger sequencing of the same aliquot of B-cells used for mass spectrometry, we validated the sequences correspond to the reference genome sequence (Table S8).

**Table S1. Characteristics of RNA-seq samples and distribution of events by individual**

| ID      | Gender | Total reads | Uniquely mapped reads | Bases $\geq$ 10 coverage | DNA coverage | Number of events |                   | Total |
|---------|--------|-------------|-----------------------|--------------------------|--------------|------------------|-------------------|-------|
|         |        |             |                       |                          |              | Homozygous SNPs  | Monomorphic sites |       |
| GM06985 | F      | 38424688    | 24864586              | 16038399                 | 2.6          | 14               | 394               | 408   |
| GM06994 | M      | 37634150    | 31439915              | 19979779                 | 4.6          | 36               | 1208              | 1244  |
| GM07000 | F      | 36665036    | 26987933              | 16357700                 | 4.1          | 45               | 1512              | 1557  |
| GM11829 | M      | 37293182    | 28117279              | 16305573                 | 6            | 17               | 1011              | 1028  |
| GM11830 | F      | 36412185    | 26729286              | 16388938                 | 6.4          | 31               | 938               | 969   |
| GM11831 | M      | 38923882    | 26175492              | 16683852                 | 6.4          | 29               | 965               | 994   |
| GM11832 | F      | 38657782    | 27779737              | 16629265                 | 2.8          | 27               | 956               | 983   |
| GM11881 | M      | 49771575    | 29645009              | 15899948                 | 5.1          | 29               | 1462              | 1491  |
| GM11992 | M      | 63260299    | 41104692              | 17703651                 | 5.7          | 53               | 1810              | 1863  |
| GM11993 | F      | 38441615    | 27190601              | 15681535                 | 3.7          | 12               | 621               | 633   |
| GM11994 | M      | 42390584    | 27741424              | 16702144                 | 13.8         | 18               | 466               | 484   |
| GM12003 | M      | 36977676    | 29073057              | 17727318                 | 5.9          | 46               | 1384              | 1430  |
| GM12004 | F      | 28390919    | 21836374              | 13369507                 | 6.2          | 6                | 480               | 486   |
| GM12005 | M      | 45286259    | 25260540              | 11909776                 | 6.1          | 20               | 1248              | 1268  |
| GM12006 | F      | 35506222    | 28101550              | 14554102                 | 3.3          | 34               | 1070              | 1104  |
| GM12043 | M      | 36999366    | 27453229              | 17312508                 | 4.2          | 26               | 728               | 754   |
| GM12044 | F      | 39839492    | 30992207              | 16088150                 | 4.7          | 40               | 1255              | 1295  |
| GM12144 | M      | 35020229    | 21561396              | 11631101                 | 5.5          | 45               | 1334              | 1379  |
| GM12155 | M      | 43551373    | 33153306              | 16821880                 | 11.7         | 9                | 273               | 282   |
| GM12716 | M      | 46656852    | 30454296              | 16024579                 | 5.9          | 45               | 1358              | 1403  |
| GM12717 | F      | 40635780    | 32974555              | 20054384                 | 5.2          | 25               | 1339              | 1364  |
| GM12750 | M      | 45066631    | 31480502              | 17290976                 | 4.2          | 32               | 1319              | 1351  |
| GM12762 | M      | 47651198    | 31766092              | 17761776                 | 2.2          | 22               | 819               | 841   |
| GM12813 | F      | 45288662    | 34565796              | 18137367                 | 3.7          | 35               | 1179              | 1214  |
| GM12814 | M      | 39024182    | 29109410              | 16700518                 | 4.7          | 28               | 996               | 1024  |
| GM12872 | M      | 45367154    | 17499200              | 9290271                  | 4.9          | 42               | 927               | 969   |
| GM12874 | M      | 39588081    | 20781628              | 10406285                 | 4.9          | 29               | 919               | 948   |
| Total   |        | 1108725054  | 763839092             | 429451282                | 144.5        | 795              | 27971             | 28766 |
| Mean    |        | 41063891    | 28290337              | 15905603                 | 5.4          | 29               | 1036              | 1065  |

Table S2. Genomic DNA sequences verified by Sanger sequencing.

| Gene     | RDD  | Location        | genomic DNA (Sanger) |
|----------|------|-----------------|----------------------|
| CD22     | TtoG | chr19:40514815  | T                    |
| DFNA5    | TtoA | chr7:24705225   | T                    |
| ENO1     | TtoC | chr1:8848125    | T                    |
| FH       | TtoA | chr1:239747217  | T                    |
| HMGB1    | TtoA | chr13:29935772  | T                    |
| HMGB1    | AtoC | chr13:29935469  | A                    |
| ITPR3    | AtoC | chr6:33755773   | A                    |
| RAD50    | TtoG | chr5:131979610  | T                    |
| ROD1     | GtoT | chr9:114026264  | G                    |
| RPL32    | GtoT | chr3:12852658   | G                    |
| RPS25P8  | AtoG | chr11:118393375 | A                    |
| RPS3AP47 | CtoA | chr4:152243651  | C                    |
| SUPT5H   | GtoT | chr19:44655806  | G                    |
| TOR1AIP1 | TtoC | chr1:178144365  | T                    |
| TUBA1    | AtoG | chr2:219823379  | A                    |

\* RDD sites are those that were found as RNA forms in peptides (mass spectrometry analysis). We sequenced DNA extracted from the pooled samples of cell extracts used in the mass spectrometry analysis. Sanger sequencing verified that all the sites are monomorphic; the results agree with the sequencing data from the 1000 Genomes and Human Genome Projects (as shown in the UCSC Genome Browser for the reference genome).



| Table S3. EST clones that contain RDD alleles |     |                               |                                                            |      |
|-----------------------------------------------|-----|-------------------------------|------------------------------------------------------------|------|
| Gene                                          | Chr | Position (bp)                 | EST evidence                                               | Type |
| CLSTN1                                        | 1   | 9712103                       | AU152901 (teratocarcinoma),                                | AtoC |
| <i>DCP1A</i>                                  | 3   | 53,297,343                    | DA808260 (brain), BX100388 (liver spleen)                  | AtoC |
| <i>EIF4G3</i>                                 | 1   | 21168555                      | no EST found                                               | AtoC |
| <i>HSP90AB1</i>                               | 6   | 44,328,823                    | BQ355193 (head neck), BX413896 (B cells)                   | AtoC |
| <i>KDELR1</i>                                 | 19  | 53584669                      | BU543348 (prostate), CF995267 (chondrosarcoma)             | AtoC |
| <i>LSP1</i>                                   | 11  | 1,870,029                     | AI217606 (fetal heart), AI950527 (squamous cell carcinoma) | AtoC |
| <i>NADK</i>                                   | 1   | 1674121                       | no EST found                                               | AtoC |
| <i>NPEPPS</i>                                 | 17  | 43055387                      | CA450360 (lung), BQ575372 (chondrosarcoma)                 | AtoC |
| <i>SRM</i>                                    | 1   | 11037319                      | no EST found                                               | AtoC |
| <i>TRIT1</i>                                  | 1   | 40082465                      | BF367406 (placenta)                                        | AtoC |
|                                               |     |                               |                                                            |      |
| <i>AZIN1</i>                                  | 8   | 103910812*                    | CD359333 (testis), BF475970 (prostate)                     | AtoG |
| <i>BLCAP</i>                                  | 20  | 35580977#                     | DB116616 (thymus), DB026916 (testis)                       | AtoG |
| <i>EIF2AK2</i>                                | 2   | 37181512, 37181517*, 37181520 | no EST found                                               | AtoG |
| <i>FLNB</i>                                   | 3   | 58116831*                     | DB275343 (uterus), DA233151 (brain)                        | AtoG |
| <i>MLEC</i>                                   | 12  | 119623907                     | no EST found                                               | AtoG |
| <i>MPDU1</i>                                  | 17  | 7431312                       | CA406137 (adipose), BU527340 (epidermoid carcinoma)        | AtoG |
| <i>PPIA</i>                                   | 7   | 44808624*                     | BM929405 (eye), BM909254 (astrocytoma)                     | AtoG |
| <i>SLC16A1</i>                                | 1   | 113256882                     | no EST found                                               | AtoG |
| <i>SURF4</i>                                  | 9   | 135219393                     | CD513428 (brain), CB159710 (liver)                         | AtoG |
| <i>UBE2J2</i>                                 | 1   | 1181354                       | no EST found                                               | AtoG |
|                                               |     |                               |                                                            |      |
| <i>AK2</i>                                    | 1   | 33247070                      | CK725144 (bone), BQ086338 (pancreatic islet)               | AtoT |
| <i>ANKRD10</i>                                | 13  | 110344637                     | no EST found                                               | AtoT |
| <i>B2M</i>                                    | 15  | 42791020                      | AV733993 (pheochromocytoma), CK002538 (brain)              | AtoT |
| <i>CNBP</i>                                   | 3   | 130,372,812                   | EL955109 (eye), BJ995106 (hepatoblastoma)                  | AtoT |
| <i>COX6A1</i>                                 | 12  | 119362764                     | AI092730 (heart), AI290411 (placenta)                      | AtoT |
| <i>EEF1G</i>                                  | 11  | 62083794                      | BX393801 (neuroblastoma), BX378319 (placenta)              | AtoT |
| <i>FBXO42</i>                                 | 1   | 16514300                      | no EST found                                               | AtoT |
| <i>MALAT1</i>                                 | 11  | 65026864                      | no EST found                                               | AtoT |
| <i>PPP3CB</i>                                 | 10  | 74876339                      | no EST found                                               | AtoT |
| <i>RNF2</i>                                   | 1   | 183327390                     | CN265767 (ES)                                              | AtoT |
|                                               |     |                               |                                                            |      |
| <i>GSTP1</i>                                  | 11  | 67,110,698                    | AA701043 (pineal), BP425295 (intestine)                    | CtoA |
| <i>HIGD2A</i>                                 | 5   | 175749358                     | DN999057 (bone marrow), EC557582 (prostate)                | CtoA |
| <i>HINT1</i>                                  | 5   | 130522885                     | AA826846 (prostate)                                        | CtoA |
| <i>MX1</i>                                    | 21  | 41,753,010                    | BP387195 (pancreatic islet), CA307542 (macrophage)         | CtoA |
| <i>MYL6</i>                                   | 12  | 54,841,626                    | EC496428 (prostate), BG030232 (breast adenocarcinoma)      | CtoA |
| <i>PDCL3</i>                                  | 2   | 100554512                     | CD103783 (skin), AW955784 (colon tumor)                    | CtoA |
| <i>RPL3</i>                                   | 22  | 38038834                      | CA305940 (macrophage), CD106758 (brain)                    | CtoA |
| <i>RPS3A</i>                                  | 4   | 152240239                     | CR991113 (T-cells), DW429987 (liver)                       | CtoA |
| <i>ST13</i>                                   | 22  | 39558576                      | no EST found                                               | CtoA |
| <i>VDAC2</i>                                  | 10  | 76,661,042                    | BP197712 (adrenal), BX364042 (B cell)                      | CtoA |
|                                               |     |                               |                                                            |      |
| <i>ARID1A</i>                                 | 1   | 26971890                      | DB293877 (endothelial cells), DB276783 (uterus)            | CtoG |
| <i>B2M</i>                                    | 15  | 42,791,002                    | FN155323 (breast carcinoma), DW465469 (liver)              | CtoG |
| <i>COMT</i>                                   | 22  | 18,336,272                    | AI797179 (carcinoid), BX339791 (placenta)                  | CtoG |
| <i>CYTH2</i>                                  | 19  | 53673135                      | CN364748 (ES), BX455397 (brain)                            | CtoG |
| <i>H2AFX</i>                                  | 11  | 118470179                     | no EST found                                               | CtoG |
| <i>NDUFC2</i>                                 | 11  | 77,468,303                    | DB105510 (thymus), EL950726 (eye)                          | CtoG |
| <i>RBM23</i>                                  | 14  | 22,440,217                    | BQ232763 (testis, embryonic)                               | CtoG |
| <i>RPLP1</i>                                  | 15  | 67532211                      | DW467524 (liver), CK001450 (brain)                         | CtoG |
| <i>SFRS5</i>                                  | 14  | 69303847                      | no EST found                                               | CtoG |
| <i>SNRPE</i>                                  | 1   | 202099467                     | no EST found                                               | CtoG |
|                                               |     |                               |                                                            |      |
| <i>CTBP2</i>                                  | 10  | 126672506                     | AA309267 (hepatocellular carcinoma), AW961838 (colon)      | CtoT |
| <i>DPP7</i>                                   | 9   | 139,128,755                   | DB282304 (uterus), DB083627 (testis)                       | CtoT |
| <i>GON4L</i>                                  | 1   | 154020201                     | BI114125 (rhabdomyosarcoma), DA569196 (embryonic tissues)  | CtoT |
| <i>NDUFS5</i>                                 | 1   | 39264595                      | DW435173 (liver), BM738465 (lymphoblast)                   | CtoT |
| <i>PRDM2</i>                                  | 1   | 13986214                      | no EST found                                               | CtoT |
| <i>RPL23</i>                                  | 17  | 34,263,515                    | BP206252 (smooth muscle), CK128791 (embryonic stem cell)   | CtoT |
| <i>SLC25A1</i>                                | 22  | 17,543,578                    | BY798887 (eye), BX383114 (T cell)                          | CtoT |
| <i>SLC25A1</i>                                | 22  | 17543578                      | BY798887 (eye), BX407174 (placenta)                        | CtoT |

|                     |    |                                    |                                                            |                  |
|---------------------|----|------------------------------------|------------------------------------------------------------|------------------|
| <i>TUBB2B</i>       | 6  | 3,169,822                          | no EST found                                               | CtoT             |
| <i>UBE2G2</i>       | 21 | 45015596                           | BI253788 (cervical carcinoma)                              | CtoT             |
| <i>BLNK</i>         | 10 | 97,957,645                         | BF972964 (leiomyosarcoma), BE881159 (lung carcinoma)       | GtoA             |
| <i>CARHSP1</i>      | 16 | 8,856,270                          | BY995830 (mast cell), CB055134 (glioblastoma)              | GtoA             |
| <i>DUSP</i>         | 10 | 112,261,285                        | no EST found                                               | GtoA             |
| <i>FBX044</i>       | 1  | 11641457                           | no EST found                                               | GtoA             |
| <i>FIBP</i>         | 11 | 65,407,967                         | CD017568 (hemopoietic stem cell), CB306355 (epithelium)    | GtoA             |
| <i>GPX1</i>         | 3  | 49,369,615                         | BP389951 (pancreatic islet), BP294983 (macrophage)         | GtoA             |
| <i>HLA-DQB2</i>     | 6  | 32,833,537, 32,833,545, 32,833,537 | no EST found                                               | GtoA, GtoA, CtoT |
| <i>PFKL</i>         | 21 | 44,571,683                         | CT000835 (T cell), AU310615 (neuroblastoma)                | GtoA             |
| <i>RHOT1</i>        | 17 | 27,526,465                         | BQ345807 (nerve tumor)                                     | GtoA             |
| <i>TAF5L</i>        | 1  | 227805007                          | BF091853 (testis), AW170566 (cervix)                       | GtoA             |
| <i>C17orf70</i>     | 17 | 77,117,583                         | AA625546 (melanocyte), AA564879 (prostate)                 | GtoC             |
| <i>CCDC88B</i>      | 11 | 63873710                           | No EST found                                               | GtoC             |
| <i>CHFR</i>         | 12 | 131927447                          | BI262008 (lymphoma), BF736510 (bladder tumor)              | GtoC             |
| <i>CTBP2</i>        | 10 | 126717637                          | CD106509 (pituitary)                                       | GtoC             |
| <i>DDX24</i>        | 14 | 93587286                           | No EST found                                               | GtoC             |
| <i>EI24</i>         | 11 | 124957509                          | No EST found                                               | GtoC             |
| <i>HMGB1</i>        | 13 | 29934680                           | AU128946 (teratocarcinoma), CB267551 (adipose)             | GtoC             |
| <i>PRC1</i>         | 15 | 89326052                           | CN348404 (ES), BF969637 (adrenal cortex carcinoma)         | GtoC             |
| <i>PTOV1</i>        | 19 | 55055410                           | EL953342 (eye), EC536111 (prostate)                        | GtoC             |
| <i>ZWINT</i>        | 10 | 57787551                           | No EST found                                               | GtoC             |
| <i>DHCR7</i>        | 11 | 70837047                           | BX383615 (T cells)                                         | GtoT             |
| <i>GOLGA3</i>       | 12 | 131858545                          | no EST found                                               | GtoT             |
| <i>HMG2</i>         | 1  | 26674349                           | BX388386 (neuroblastoma), BE091398 (breast)                | GtoT             |
| <i>HNRNPA1P2</i>    | 12 | 52962537                           | BM083591 (large cell carcinoma), BE882415 (leiomyosarcoma) | GtoT             |
| <i>IRF2BP2</i>      | 1  | 232808841                          | BM994807 (chondrosarcoma), BE062504 (breast)               | GtoT             |
| <i>MMACHC/PRDX1</i> | 1  | 45749309                           | BU934412 (pooled), BY999091 (epithelium)                   | GtoT             |
| <i>PAN2</i>         | 12 | 54999230                           | no EST found                                               | GtoT             |
| <i>PGAP2</i>        | 11 | 3801714                            | no EST found                                               | GtoT             |
| <i>RBM23</i>        | 14 | 22440250                           | BQ232763 (testis)                                          | GtoT             |
| <i>STAT2</i>        | 12 | 55036254                           | no EST found                                               | GtoT             |
| <i>ARHGDIB</i>      | 12 | 14986231                           | AW893953 (nerve), AW513645 (granulosa tumor)               | TtoA             |
| <i>LAPTM5</i>       | 1  | 30977905                           | no EST found                                               | TtoA             |
| <i>PCBP2</i>        | 12 | 52159874                           | BG204392 (sarcoma), BG200284 (sarcoma)                     | TtoA             |
| <i>PPP3CB</i>       | 10 | 74876340                           | DA791456 (brain), BP377586 (uterus)                        | TtoA             |
| <i>PRPF38A</i>      | 1  | 52655038                           | no EST found                                               | TtoA             |
| <i>PSMD4</i>        | 1  | 149501330                          | no EST found                                               | TtoA             |
| <i>RAN</i>          | 12 | 129926756                          | BP389950 (pancreas)                                        | TtoA             |
| <i>RPS8</i>         | 1  | 45017000                           | BY998701 (epithelium), DT220983 (brain)                    | TtoA             |
| <i>SRGN</i>         | 10 | 70534516                           | no EST found                                               | TtoA             |
| <i>VPS26A</i>       | 10 | 70601993                           | CD678067 (bone), AA093598 (heart)                          | TtoA             |
| <i>AL662795</i>     | 6  | 30336961                           | CT000809 (T-cells), CT003894 (T-cells)                     | TtoC             |
| <i>BTN2A2</i>       | 6  | 26499056                           | AI254396 (ovarian carcinoma), AA527650 (sarcoma)           | TtoC             |
| <i>COMMD1</i>       | 2  | 62216686                           | no EST found                                               | TtoC             |
| <i>CTPS</i>         | 1  | 41249976                           | no EST found                                               | TtoC             |
| <i>HMG2</i>         | 1  | 26674233                           | CB145560 (liver), BQ647981 (hepatocellular carcinoma)      | TtoC             |
| <i>MARCKSL1</i>     | 1  | 32572034                           | no EST found                                               | TtoC             |
| <i>PABPCP5</i>      | 8  | 101786358                          | BE181981 (head, neck)                                      | TtoC             |
| <i>PUM1</i>         | 1  | 31177027                           | no EST found                                               | TtoC             |
| <i>SYK</i>          | 9  | 92700130                           | DA829334 (placenta), BG754228 (B-cells)                    | TtoC             |
| <i>TRNAU1AP</i>     | 1  | 28763847                           | DA923318 (intestine), CA395907 (retina)                    | TtoC             |
| <i>C11orf10</i>     | 11 | 61316640                           | CD685627 (nasopharynx), BU960944 (mixed cell types)        | TtoG             |
| <i>CLP1</i>         | 11 | 57184884                           | BI856612 (mammary adenocarcinoma),                         | TtoG             |
| <i>GANAB</i>        | 11 | 62156790                           | DC409644 (thymus), DC335243 (hippocampus)                  | TtoG             |
| <i>HK1</i>          | 10 | 70831630                           | no EST found                                               | TtoG             |
| <i>MDM4</i>         | 1  | 202789468                          | no EST found                                               | TtoG             |
| <i>PRPF3</i>        | 1  | 148571780                          | no EST found                                               | TtoG             |
| <i>RPL37</i>        | 5  | 40,871,072                         | CF124792 (T cell), DW459229 (liver)                        | TtoG             |

|                                                                                                                                                         |    |           |                                                            |      |
|---------------------------------------------------------------------------------------------------------------------------------------------------------|----|-----------|------------------------------------------------------------|------|
| <i>RPS2</i>                                                                                                                                             | 16 | 1,954,544 | BU175665 (lung carcinoma), BQ672658 (epidermoid carcinoma) | TtoG |
| <i>SLAMF6</i>                                                                                                                                           | 1  | 158759594 | CD635370 (not specified),                                  | TtoG |
| <i>TPM3</i>                                                                                                                                             | 1  | 152412239 | BI020350 (bone marrow), AW800178 (uterus)                  | TtoG |
| For most sites, we found multiple ESTs that contain the RNA-forms of the RDD sites, we listed two per site as examples.                                 |    |           |                                                            |      |
| # Reported in Reidmann et al, 2008                                                                                                                      |    |           |                                                            |      |
| * Also identified by Li, Levanon et al, 2010.                                                                                                           |    |           |                                                            |      |
| All sites listed are monomorphic sites in the genome (except DPP7) thus the genomic sequences of the ESTs should be the same as the reference sequence. |    |           |                                                            |      |

Table S4. Mass spectrometry data in ovarian cancer cells (A) and leukemia cells (B) detected peptides encoded by DNA or RNA sequences (underlined) at multiple RDD sites.

| <b>A. Peptides detected form HOC-7 ovarian cancer cell line</b> |                  |            |                  |                                |                                |
|-----------------------------------------------------------------|------------------|------------|------------------|--------------------------------|--------------------------------|
| <b>Protein</b>                                                  | <b>Location*</b> | <b>RDD</b> | <b>AA change</b> | <b>DNA form peptide</b>        | <b>RNA form peptide</b>        |
| RPL28*                                                          | chr19:60590467   | T-to-A     | STOP-to-R        | N/A                            | SLIGTASEPR                     |
| TUBA1                                                           | chr2:219823379   | A-to-G     | E-to-G           | EDMAALE <u>K</u>               | EDMAAL <u>G</u> K              |
| HSPA4                                                           | chr5:132459768   | T-to-G     | V-to-G           | TST <u>V</u> DLPIENQLLWQIDR    | TST <u>G</u> DLPIENQLLWQIDR    |
| HSP90AB1                                                        | chr6:44328823    | A-to-C     | T-to-P           | LVSSPCCIVTSTYGW <u>I</u> ANMER | LVSSPCCIVTSTYGW <u>P</u> ANMER |

| <b>B. Peptides detected form K562 leukemia cell line</b> |                  |            |                  |                         |                         |
|----------------------------------------------------------|------------------|------------|------------------|-------------------------|-------------------------|
| <b>Protein</b>                                           | <b>Location*</b> | <b>RDD</b> | <b>AA change</b> | <b>DNA form peptide</b> | <b>RNA form peptide</b> |
| DHX15                                                    | chr4:24187092    | T-to-A     | Y-to-N           | <u>Y</u> YDILK          | <u>N</u> YDILK          |
| ENO3                                                     | chr17:4800624    | T-to-G     | V-to-G           | N/D                     | LAQSNWGGMVSHR           |
| FABP3                                                    | chr1:31618424    | T-to-A     | W-to-R           | N/D                     | MVDAFLG <u>T</u> R      |
| HNRNPA3                                                  | chr2:177789664   | T-to-C     | S-to-P           | N/D                     | GGG <u>P</u> GNFMGR     |
| HNRNPL                                                   | chr19:44021390   | C-to-A     | Q-to-K           | AITHLNNNFMFG <u>Q</u> K | AITHLNNNFMFG <u>K</u> K |
| MYH10                                                    | chr17:8357846    | T-to-G     | W-to-G           | N/D                     | HWQW <u>G</u> R         |
| RANBP2                                                   | chr2:108765620   | T-to-A     | I-to-K           | <u>I</u> TMELFSNIVPR    | <u>K</u> TMELFSNIVPR    |
| USP34                                                    | chr2:61329192    | T-to-A     | Y-to-N           | N/D                     | LDMPN <u>T</u> EDFLMGK  |
| ZFP91                                                    | chr11:58138282   | A-to-G     | H-to-R           | N/D                     | YLQHRIK                 |

\* hg 18 of human genome build. (N/A- not applicable; N/D - not detected)

**Table S5.**Peptides encoded by DNA or RNA sequences at the RDD sites were detected in mass spectrometry analysis of cultured B-cells.

| Protein  | RDD site        | RDD    | AA change | Detected peptide                       | Coded by |
|----------|-----------------|--------|-----------|----------------------------------------|----------|
| AP2A2    | chr11:976858    | T-to-G | Y-to-D    | <u>D</u> LALES <u>M</u> CTLASSEFSHEAVK | RNA      |
| AP2A2    | chr11:976858    | T-to-G | Y-to-D    | <u>Y</u> LALES <u>M</u> CTLASSEFSHEAVK | DNA      |
| DFNA5    | chr7:24705225   | T-to-A | L-to-Q    | VFP <u>Q</u> LLCITLNGLCALGR            | RNA      |
| DFNA5    | chr7:24705225   | T-to-A | L-to-Q    | VFP <u>L</u> LLCITLNGLCALGR            | DNA      |
| ENO1     | chr1:8848125    | T-to-C | L-to-P    | EG <u>P</u> ELLK                       | RNA      |
| ENO1     | chr1:8848125    | T-to-C | L-to-P    | EG <u>L</u> ELLK                       | DNA      |
| ENO3     | chr17:4800624   | T-to-G | V-to-G    | LAQSN <u>G</u> WG <u>G</u> MVSHR       | RNA      |
| ENO3     | chr17:4800624   | T-to-G | V-to-G    | LAQSN <u>G</u> WG <u>V</u> MVSHR       | DNA      |
| FABP3    | chr1:31618424   | T-to-A | W-to-R    | MVDAFL <u>G</u> TR                     | RNA      |
| FABP3    | chr1:31618424   | T-to-A | W-to-R    | MVDAFL <u>T</u> WK                     | DNA      |
| FH       | chr1:239747217  | T-to-A | I-to-K    | <u>K</u> EYDTFGELK                     | RNA      |
| FH       | chr1:239747217  | T-to-A | I-to-K    | <u>I</u> EYDTFGELK                     | DNA      |
| HMGB1    | chr13:29935772  | T-to-A | Y-to-N    | MSSNAFFVQTCR                           | RNA      |
| HMGB1    | chr13:29935772  | T-to-A | Y-to-N    | MSS <u>Y</u> AFFVQTCR                  | DNA      |
| NACA     | chr12:55392932  | G-to-A | D-to-N    | <u>N</u> IELVMSQANVSR                  | RNA      |
| NACA     | chr12:55392932  | G-to-A | D-to-N    | <u>D</u> IELVMSQANVSR                  | DNA      |
| NSF      | chr17:42161411  | T-to-C | V-to-A    | LLDY <u>A</u> PIGPR                    | RNA      |
| NSF      | chr17:42161411  | T-to-C | V-to-A    | LLDY <u>V</u> PIGPR                    | DNA      |
| POLR2B   | chr4:57567852   | T-to-A | L-to-Q    | IISD <u>G</u> QK                       | RNA      |
| POLR2B   | chr4:57567852   | T-to-A | L-to-Q    | IISD <u>L</u> GK                       | DNA      |
| RAD50    | chr5:131979610  | T-to-G | L-to-R    | WRQDN <u>L</u> TLR                     | RNA      |
| RAD50    | chr5:131979610  | T-to-G | L-to-R    | WLQDN <u>L</u> TLR                     | DNA      |
| RPL12    | chr9:129250509  | A-to-G | N-to-D    | HSGD <u>I</u> T <u>F</u> DEIVNIAR      | RNA      |
| RPL12    | chr9:129250509  | A-to-G | N-to-D    | HSGN <u>I</u> T <u>F</u> DEIVNIAR      | DNA      |
| RPL28    | chr19:60590467  | T-to-A | STOP-to-R | SLIGT <u>A</u> SEPR                    | RNA      |
| RPL32    | chr3:12852658   | G-to-T | A-to-S    | <u>S</u> AQLAIR                        | RNA      |
| RPL32    | chr3:12852658   | G-to-T | A-to-S    | <u>A</u> AQLAIR                        | DNA      |
| RPS3AP47 | chr4:152243651  | C-to-A | T-to-K    | EV <u>Q</u> KNDLK                      | RNA      |
| RPS3AP47 | chr4:152243651  | C-to-A | T-to-K    | EV <u>Q</u> TNDLK                      | DNA      |
| SLC25A17 | chr22:39520485  | A-to-G | E-to-G    | TTHMVLL <u>G</u> IIK                   | RNA      |
| SLC25A17 | chr22:39520485  | A-to-G | E-to-G    | SKTTHMVLL <u>E</u> IIK                 | DNA      |
| TUBA1    | chr2:219823379  | A-to-G | E-to-G    | EDMAAL <u>G</u> K                      | RNA      |
| TUBA1    | chr2:219823379  | A-to-G | E-to-G    | EDMAAL <u>E</u> K                      | DNA      |
| TUBB2C   | chr9:139257297  | G-to-A | G-to-D    | LHFFMP <u>P</u> FAPLTSR                | RNA      |
| TUBB2C   | chr9:139257297  | G-to-A | G-to-D    | LHFFMP <u>G</u> FAPLTSR                | DNA      |
| HMGB1    | chr13:29935469  | A-to-C | K-to-N    | TMSA <u>K</u> EN                       | RNA      |
| TOR1AIP1 | chr1:178144365  | T-to-C | S-to-P    | QPSVLSP <u>G</u> YQK                   | RNA      |
| RPS25P8  | chr11:118393375 | A-to-G | N-to-D    | EVP <u>D</u> YK                        | RNA      |
| CD22     | chr19:40514815  | T-to-G | L-to-R    | MHLL <u>G</u> PWLLLR                   | RNA      |
| SUPT5H   | chr19:44655806  | G-to-T | Q-to-H    | TPMYGSQT <u>P</u> LHDGSR               | RNA      |
| ITPR3    | chr6:33755773   | A-to-C | D-to-A    | DGVEDHSPLMYHISLVALLAACAE <u>G</u> K    | RNA      |
| CDC2L5   | chr7:40094317   | A-to-G | M-to-V    | QMG <u>V</u> TDDVSTIK                  | RNA      |
| ASAH1    | chr8:17965017   | C-to-A | H-to-N    | GIAAVTDIPL <u>G</u> NLIHGR             | RNA      |
| POP1     | chr8:99237725   | T-to-G | C-to-G    | EAE <u>E</u> VMDAG <u>G</u> QESAGPER   | RNA      |
| ROD1     | chr9:114026264  | G-to-T | G-to-V    | NLFIEA <u>V</u> CSVK                   | RNA      |
| PGD      | chr1:10395757   | A-to-C | T-to-P    | TELD <u>S</u> FLIEITANILK              | DNA      |
| CAPZA1   | chr1:113011240  | A-to-G | N-to-D    | IQVHY <u>Y</u> EDGN <u>V</u> QLVSHK    | DNA      |
| PSMD4    | chr1:149501316  | G-to-A | A-to-T    | LQ <u>A</u> QQDAVNIVCHSK               | DNA      |
| PSMD4    | chr1:149503099  | A-to-G | T-to-A    | IT <u>F</u> CTGIR                      | DNA      |

|          |                 |        |           |                                  |     |
|----------|-----------------|--------|-----------|----------------------------------|-----|
| PSMD4    | chr1:149505434  | A-to-C | T-to-P    | MTISQQEFGR                       | DNA |
| RAB13    | chr1:152225281  | T-to-C | V-to-A    | LLIGDSGVGK                       | DNA |
| TPM3     | chr1:152412062  | T-to-C | V-to-A    | LVIIEGDLER                       | DNA |
| TPM3     | chr1:152412239  | T-to-G | I-to-S    | MELQEIQLK                        | DNA |
| TPM3     | chr1:152422191  | T-to-G | V-to-G    | MAGITTIEAVK                      | DNA |
| ADAR     | chr1:152828520  | A-to-G | E-to-G    | GETVNDCHAEIISR                   | DNA |
| ARHGEF2  | chr1:154188626  | T-to-C | V-to-A    | DLLVGPVVELLLTPR                  | DNA |
| COPA     | chr1:158571656  | T-to-G | H-to-Q    | TTFHHEYPWILSASDDQTIR             | DNA |
| ALDH9A1  | chr1:163931204  | T-to-G | V-to-G    | EVNLAVQNAK                       | DNA |
| UBR4     | chr1:19354011   | T-to-G | I-to-S    | TTLEVLQLFPINIK                   | DNA |
| KIAA0090 | chr1:19418760   | T-to-C | Y-to-H    | EENLIPYSPDVQIHAER                | DNA |
| AKR7A2   | chr1:19505140   | T-to-C | S-to-P    | ALQAAYGASAPSVTSAALR              | DNA |
| PTPRC    | chr1:196970974  | T-to-A | D-to-E    | CPDYIIQK                         | DNA |
| SNRPE    | chr1:202099460  | T-to-A | I-to-K    | IEGCIIGFDEYMNLVLDDAEIHSK         | DNA |
| RAB3GAP2 | chr1:218450777  | T-to-C | F-to-L    | FYTENGVLLLAQLLNEDPVLQLK          | DNA |
| GALNT2   | chr1:228438406  | T-to-G | V-to-G    | VDPATSVVITFHNEAR                 | DNA |
| RPL11    | chr1:23891686   | C-to-G | Q-to-E    | MAQDQGEK                         | DNA |
| C1orf128 | chr1:23984835   | G-to-A | G-to-E    | DLTGELEYATK                      | DNA |
| FAM36A   | chr1:243071920  | C-to-G | H-to-D    | HSILYGSLSVAVAGFGHFLFTSR          | DNA |
| KPNA6    | chr1:32405361   | T-to-G | V-to-G    | AQIQAVIDANIFPVLIILQK             | DNA |
| NDUFS5   | chr1:39267183   | T-to-C | L-to-S    | IEYDDFVECLLR                     | DNA |
| MACF1    | chr1:39591327   | T-to-C | V-to-A    | IDALLDWVTSVGSQGLLTNLPGMQLSGASLEK | DNA |
| MACF1    | chr1:39669016   | T-to-C | V-to-A    | LVLDTVNEVSR                      | DNA |
| TOE1     | chr1:45580673   | A-to-C | T-to-P    | TLFLELIR                         | DNA |
| ENO1     | chr1:8844063    | G-to-T | E-to-D    | IEEELGSK                         | DNA |
| ENO1     | chr1:8845549    | T-to-A | Y-to-N    | YNQLLR                           | DNA |
| ENO1     | chr1:8846682    | A-to-C | T-to-P    | FTASAGIQVVGDDLTVTNPK             | DNA |
| ENO1     | chr1:8850693    | T-to-C | V-to-A    | LNVTQEKEK                        | DNA |
| ENO1     | chr1:8854615    | G-to-C | V-to-L    | AAVPSGASTGIYEALRLR               | DNA |
| ENO1     | chr1:8857500    | A-to-G | T-to-A    | GNPTVEVDLFTSK                    | DNA |
| ABCD3    | chr1:94736821   | G-to-T | E-to-STOP | VLGELWPLFGGR                     | DNA |
| ACTR1A   | chr10:104231754 | T-to-C | F-to-L    | TLFSNIVLSGGSTLFK                 | DNA |
| SMC3     | chr10:112350812 | A-to-C | T-to-P    | ETEGGTVLTATTSELEANK              | DNA |
| BMS1     | chr10:42617671  | T-to-G | D-to-E    | VLAEDEELYGDFEDLETGDVHK           | DNA |
| TFAM     | chr10:59815388  | T-to-G | C-to-W    | SGAELCTGCGSR                     | DNA |
| DDX21    | chr10:70398756  | A-to-G | Q-to-R    | DSEDNPQTLIFSATCPHWVFNVAK         | DNA |
| VPS26A   | chr10:70592265  | A-to-T | T-to-S    | EITGIGPSTTTTETETIAK              | DNA |
| PPA1     | chr10:71644307  | T-to-G | C-to-W    | HTGCCGDNDPIDVCEIGSK              | DNA |
| AASDHPPT | chr11:105467314 | T-to-A | L-to-H    | LEFDLSPLNLDIGQVYK                | DNA |
| RPS25P8  | chr11:118393360 | A-to-C | T-to-P    | LITPAVVSER                       | DNA |
| RPS25P8  | chr11:118393425 | T-to-C | L-to-S    | LNNLVLFDK                        | DNA |
| SAAL1    | chr11:18061854  | T-to-A | V-to-E    | VDLPLIDSLIR                      | DNA |
| NAP1L4   | chr11:2953860   | T-to-C | V-to-A    | LDNVPHTPSSYIETLPK                | DNA |
| COMMD9   | chr11:36254337  | T-to-G | W-to-G    | LVDLDWR                          | DNA |
| TUT1     | chr11:62083776  | C-to-G | A-to-G    | EYFSWEGAFQHVKG                   | DNA |
| TUT1     | chr11:62083844  | G-to-T | W-to-C    | GQELAFPLSPDWQVDYESYTW            | DNA |
| TUT1     | chr11:62090860  | C-to-G | P-to-R    | DPFAHLPK                         | DNA |
| TUT1     | chr11:62090860  | C-to-G | P-to-A    | TPSLTCPR                         | DNA |
| GANAB    | chr11:62150937  | A-to-C | T-to-P    | HHGPQTLYLPVTLSSIPVFQR            | DNA |
| PPP1R14B | chr11:63770495  | T-to-C | L-to-P    | LNLEEWILEQLTR                    | DNA |
| IPO7     | chr11:9420282   | A-to-G | D-to-G    | QLQDIATLADQR                     | DNA |
| ARL1     | chr12:100320831 | T-to-C | V-to-A    | LQVGEVTTIPTIGFNVETVYK            | DNA |
| HSP90B1  | chr12:102861072 | G-to-A | A-to-T    | GYEVIYLTEPVDEYCIQALPEFDGK        | DNA |

|           |                 |        |        |                                            |     |
|-----------|-----------------|--------|--------|--------------------------------------------|-----|
| HSP90B1   | chr12:102861093 | A-to-G | K-to-E | GYEVIYLTEPVDEYCIQALPEFDGKR                 | DNA |
| HSP90B1   | chr12:102861718 | T-to-G | S-to-A | LTESPCALVASQYGW <del>S</del> GNMER         | DNA |
| RPL6P10   | chr12:111328141 | A-to-G | N-to-D | IDISNVK                                    | DNA |
| RPL6P10   | chr12:111328215 | T-to-C | V-to-A | QLASGLLLVTGPLYLNR                          | DNA |
| RAB35     | chr12:119026056 | T-to-G | W-to-G | LQIWDTAGQER                                | DNA |
| RPLP0P3   | chr12:119119095 | C-to-A | S-to-Y | AFLADPSAFVAAAPVAAATTAAPAAAAAPAK            | DNA |
| RPLP0P3   | chr12:119119539 | A-to-T | E-to-V | VLALSVETDYTFPLAEK                          | DNA |
| ETV6      | chr12:11928688  | A-to-C | D-to-A | LLWDYVYQLLS <del>S</del> DR                | DNA |
| UBC       | chr12:123963624 | A-to-T | E-to-V | ESTLHLVLR                                  | DNA |
| HNRNPA1P2 | chr12:52962536  | A-to-C | R-to-S | QEMASASSSQRR                               | DNA |
| STAT6     | chr12:55784520  | G-to-T | Q-to-H | LPIQLQALSLPLVVIVHGNQDNNAK                  | DNA |
| NCAPD2    | chr12:6505902   | T-to-C | I-to-T | GFVHPDPLWIPFK                              | DNA |
| RPL21     | chr13:26728451  | T-to-G | W-to-G | GTWVQLK                                    | DNA |
| LCP1      | chr13:45630661  | T-to-G | S-to-A | EGICAIGGTSEQSSVGTQHSYSEEEK                 | DNA |
| KPNA3     | chr13:49204900  | T-to-A | L-to-Q | AQNVTL <del>E</del> AILQNATSDNPVVQLSAVQAAR | DNA |
| HSP90AA2  | chr14:101617878 | C-to-T | T-to-I | LGLGIDEDDPTADDTSAAVTEEMPPLGDDDTSR          | DNA |
| HSP90AA2  | chr14:101620494 | A-to-C | Y-to-S | VFIMDNCEELIPEYLN <del>F</del> IR           | DNA |
| HNRNPC    | chr14:20771963  | G-to-T | G-to-V | MIAGQVLDINLAAEPK                           | DNA |
| PSME2     | chr14:23682660  | A-to-T | M-to-L | AMVLDLR                                    | DNA |
| PSME2     | chr14:23682668  | T-to-C | L-to-P | DEAAYGELR                                  | DNA |
| PSME2     | chr14:23683244  | C-to-G | S-to-C | VEAFQTTISK                                 | DNA |
| PSME2     | chr14:23684195  | G-to-C | C-to-S | CGFLPGNEK                                  | DNA |
| GPHN      | chr14:66705421  | T-to-G | V-to-G | IIFALPGNPVSA <del>V</del> VTCNLFVVPALR     | DNA |
| ACYP1     | chr14:74599948  | T-to-C | V-to-A | VQGVFFR                                    | DNA |
| CYFIP1    | chr15:20515200  | T-to-C | L-to-P | HVQLLGR                                    | DNA |
| CYFIP1    | chr15:20551650  | A-to-G | K-to-R | VQKHDGK                                    | DNA |
| AQR       | chr15:32973226  | T-to-G | V-to-G | TDVAVQIISNIYHNFPEQR                        | DNA |
| FAM82A2   | chr15:38817134  | T-to-C | L-to-P | TATALLESPLSATVEDAL <del>Q</del> SFLK       | DNA |
| MYO5A     | chr15:50400922  | T-to-G | V-to-G | QVLSDLAIQIYQQLVR                           | DNA |
| SLTM      | chr15:56972482  | A-to-G | K-to-E | KEILPFEK                                   | DNA |
| PTPLAD1   | chr15:63636158  | T-to-A | V-to-E | QVNITVQK                                   | DNA |
| ANP32A    | chr15:66863951  | A-to-G | N-to-S | SLDLFNCEVTNLNDYR                           | DNA |
| ANP32A    | chr15:66866825  | T-to-C | L-to-P | DLSTIEPLK                                  | DNA |
| ANP32A    | chr15:66866841  | A-to-G | N-to-D | CPNLTHLNLSGNK                              | DNA |
| ANP32A    | chr15:66867257  | T-to-C | L-to-P | LEGLTDFELEEFLSTINVGLTSIANLPK               | DNA |
| CTSH      | chr15:77002465  | T-to-G | V-to-G | VNHAVLAVGYGEK                              | DNA |
| RPS2      | chr16:1952264   | A-to-C | T-to-P | ATFDAISK                                   | DNA |
| RPS2      | chr16:1952501   | T-to-C | F-to-S | GCTATLGNFAK                                | DNA |
| RPS2      | chr16:1952579   | C-to-T | P-to-L | GTGIVSAPVPK                                | DNA |
| RPS2      | chr16:1952779   | T-to-C | W-to-R | GYWGNK                                     | DNA |
| RPS2      | chr16:1952844   | C-to-T | A-to-V | EVATAIR                                    | DNA |
| RPS2      | chr16:1952872   | C-to-G | L-to-V | AFVAIGDYNGHVGLGVK                          | DNA |
| RPS2      | chr16:1954304   | A-to-T | I-to-F | SLEEIYLFSLPIK                              | DNA |
| RBBP6     | chr16:24488024  | T-to-C | Y-to-H | EWYEK                                      | DNA |
| GTF3C1    | chr16:27421714  | T-to-C | V-to-A | NLIIEAVTNLR                                | DNA |
| MRPL28    | chr16:357701    | T-to-G | V-to-G | IYVAELIQQQLQQQALSEPAVVQK                   | DNA |
| GLG1      | chr16:73198103  | T-to-G | W-to-G | HTWSNNLAVLECLQDVR                          | DNA |
| PRPSAP2   | chr17:18721825  | A-to-C | Y-to-S | SIIGVIPYFPYSK                              | DNA |
| TMEM97    | chr17:23670508  | A-to-C | Y-to-S | ELYPVEFR                                   | DNA |
| RPL23A    | chr17:24072035  | A-to-G | K-to-R | NKLDHYAIK                                  | DNA |
| RPL23A    | chr17:24074747  | C-to-G | L-to-V | LAPDYDALDVANK                              | DNA |
| RPL19P12  | chr17:34611017  | G-to-C | A-to-P | LASSVLR                                    | DNA |
| RPL19P12  | chr17:34613861  | A-to-C | H-to-P | HMYHSLYLK                                  | DNA |

|          |                |        |           |                                          |     |
|----------|----------------|--------|-----------|------------------------------------------|-----|
| RPL19P12 | chr17:34613921 | A-to-C | H-to-P    | ILMEH <u>I</u> HK                        | DNA |
| TOP2A    | chr17:35818397 | T-to-G | C-to-W    | AAIG <u>C</u> GIVESILNWWK                | DNA |
| NPEPPS   | chr17:43046067 | A-to-G | T-to-A    | HGDG <u>T</u> TLDIMLK                    | DNA |
| PNPO     | chr17:43377042 | T-to-A | F-to-I    | FFTNFESR                                 | DNA |
| PHB      | chr17:44845585 | T-to-C | L-to-P    | FGLALAVAGGVVNSALYNVDAGHR                 | DNA |
| PHB      | chr17:44845601 | A-to-G | I-to-V    | VFES <u>I</u> GK                         | DNA |
| NME2     | chr17:46603858 | A-to-G | H-to-R    | NIH <u>G</u> SDSVK                       | DNA |
| NME2     | chr17:46603942 | C-to-A | A-to-D    | SCAHDWVVE                                | DNA |
| MAP2K6   | chr17:65031300 | T-to-C | C-to-R    | MCDFGISGYLVDSVAK                         | DNA |
| SUMO2    | chr17:70688860 | A-to-G | N-to-D    | TENNDHINLK                               | DNA |
| PFAS     | chr17:8098256  | T-to-G | F-to-V    | LMWLFGCPLLLDDVAR                         | DNA |
| PFAS     | chr17:8109640  | A-to-C | T-to-P    | APGSLVISAYAVCPD <u>I</u> TATVTPDLK       | DNA |
| RPL26    | chr17:8226270  | G-to-T | K-to-N    | KIMSSPLSK                                | DNA |
| MYL12A   | chr18:3245809  | G-to-A | E-to-K    | FTDEEVDELYR                              | DNA |
| MYL12B   | chr18:3262970  | T-to-C | M-to-T    | ATSNVFAMFDQSQIQEFK                       | DNA |
| MYL12B   | chr18:3267804  | A-to-G | M-to-V    | ELLTTMGDR                                | DNA |
| RPL17P20 | chr18:45270826 | T-to-A | L-to-H    | NAESNAE <u>L</u> K                       | DNA |
| RPL17P20 | chr18:45270875 | G-to-T | A-to-S    | SAEFLHMLK                                | DNA |
| RPL17P20 | chr18:45271908 | C-to-T | P-to-L    | YSLDPENPTK                               | DNA |
| CNDP2    | chr18:70331924 | A-to-C | H-to-P    | DVGAQILLHSHK                             | DNA |
| GCDH     | chr19:12865307 | T-to-G | C-to-W    | GYGCAGVSSVAYGLLAR                        | DNA |
| HNRNPL   | chr19:44020924 | C-to-A | H-to-N    | IQHPSNVLHFFNAPLEVTEENFFEICDELGVK         | DNA |
| HNRNPL   | chr19:44021073 | C-to-T | S-to-F    | LNVCVSK                                  | DNA |
| HNRNPL   | chr19:44026546 | C-to-G | S-to-C    | ASLNGADIYSGCCTLK                         | DNA |
| HNRNPL   | chr19:44026579 | A-to-T | D-to-V    | NGVQAMVEFDSVQSAQR                        | DNA |
| HNRNPL   | chr19:44028541 | A-to-G | Q-to-R    | QALVEFEDVLGACNAVNYAADNQIYIAGHPAFVNYSTSQK | DNA |
| HNRNPL   | chr19:44029800 | A-to-G | I-to-V    | GLIDGVVEADLVEALQEFGPI <u>S</u> YVVVMPK   | DNA |
| RPS16P1  | chr19:44616012 | T-to-G | Y-to-STOP | ALVAYYQK                                 | DNA |
| HNRNPUL1 | chr19:46492379 | A-to-C | N-to-T    | WDVLIQQATQCLNR                           | DNA |
| PAFAH1B3 | chr19:47496219 | A-to-G | T-to-A    | ELFSPLHALNFGIGGDGTQHVLWR                 | DNA |
| OPA3     | chr19:50748775 | T-to-C | V-to-A    | DEVGHLALALEALQAQVQAAPPQGALEELR           | DNA |
| RPL13A   | chr19:54682699 | A-to-C | M-to-L    | MAEVQVLVLDGR                             | DNA |
| RPL13A   | chr19:54685333 | A-to-G | I-to-V    | CEGINISGNFYR                             | DNA |
| RPL13A   | chr19:54686524 | G-to-A | V-to-I    | LAHEV <u>G</u> WK                        | DNA |
| PDCL3    | chr2:100554512 | C-to-A | H-to-N    | QGIPLCALINQHLSGLAR                       | DNA |
| PDIA6    | chr2:10846497  | T-to-G | V-to-G    | TCEEHQLCVVA <u>V</u> LPHILDTGAAGR        | DNA |
| PDIA6    | chr2:10860095  | G-to-T | V-to-L    | EVIQSDSLWL <u>V</u> EFYAPWCGHCQR         | DNA |
| UGCGL1   | chr2:128644385 | T-to-G | V-to-G    | EGETYFDVVA <u>V</u> VDPVTR               | DNA |
| MCM6     | chr2:136333433 | T-to-C | S-to-P    | ASSAAGLTA <u>A</u> VVR                   | DNA |
| DARS     | chr2:136435478 | T-to-G | V-to-G    | QQQFNQALVA <u>V</u> GDHASK               | DNA |
| MTX2     | chr2:176896369 | T-to-G | F-to-V    | GEQILLSDNAASLAVQA <u>F</u> LQMCNLIPIK    | DNA |
| HNRNPA3  | chr2:177789516 | T-to-G | V-to-G    | YHTINGHNCE <u>V</u> K                    | DNA |
| HNRNPA3  | chr2:177789554 | G-to-C | G-to-R    | QEMQSAGSQR                               | DNA |
| STAT1    | chr2:191562622 | T-to-G | L-to-R    | LQELNYNLK                                | DNA |
| ANKRD44  | chr2:197659675 | T-to-A | D-to-E    | LLQSSGAD <u>F</u> HK                     | DNA |
| HSPE1    | chr2:198074130 | A-to-G | I-to-V    | GGIMLPEK                                 | DNA |
| HSPE1    | chr2:198076072 | G-to-A | G-to-D    | VLLPEYGGTK                               | DNA |
| BZW1     | chr2:201391338 | T-to-C | S-to-P    | ELQE <u>Q</u> MSR                        | DNA |
| EEF1B2   | chr2:206733586 | T-to-G | V-to-G    | SYIEGYVPSQADV <u>V</u> FEAVSSPPPADLCHALR | DNA |
| TUBA1    | chr2:219823379 | A-to-G | E-to-G    | EDMAA <u>L</u> EK                        | DNA |
| TUBA1    | chr2:219823647 | A-to-G | S-to-G    | SIQFVDWCPTGFK                            | DNA |
| TUBA1    | chr2:219823757 | T-to-G | V-to-G    | AYHEQLSVAEITNACFEPANQMVK                 | DNA |
| DNPEP    | chr2:219960095 | T-to-G | V-to-G    | E <u>A</u> VQTAAK                        | DNA |



|          |                |        |           |                                   |     |
|----------|----------------|--------|-----------|-----------------------------------|-----|
| SP100    | chr2:231016021 | T-to-C | L-to-P    | TFFPLEGLR                         | DNA |
| PTMA     | chr2:232285464 | T-to-G | D-to-E    | AAEDDEDVDTK                       | DNA |
| COPS8    | chr2:237663350 | T-to-C | V-to-A    | DFPGIYTTINAHQWSETVQPIMEALR        | DNA |
| LRPPRC   | chr2:44055355  | A-to-G | D-to-G    | DLLQIIFFSK                        | DNA |
| PSME4    | chr2:53999792  | T-to-G | L-to-STOP | GEPVTNLVPSMVSLEETK                | DNA |
| SPTBN1   | chr2:54730317  | T-to-G | V-to-G    | VDTVNHLADELINSGHSDAATIAEWK        | DNA |
| XPO1     | chr2:61582645  | T-to-C | I-to-T    | LNMI <del>L</del> VQILK           | DNA |
| RAB1A    | chr2:65178665  | G-to-A | V-to-M    | FADDTYTESYISTIGVDFK               | DNA |
| ACTR2    | chr2:65327306  | A-to-G | T-to-A    | LNIDTR                            | DNA |
| SNRNP200 | chr2:96307286  | G-to-A | E-to-K    | MQLSAELQSDTEEILSK                 | DNA |
| FKBP1A   | chr20:1304142  | T-to-G | V-to-G    | GWEEGVAQMSVGQR                    | DNA |
| FKBP1A   | chr20:1304230  | A-to-G | K-to-E    | GQTCVVHYTGMLDGGK                  | DNA |
| RRBP1    | chr20:17565286 | T-to-G | V-to-G    | EQEITAVQAR                        | DNA |
| SEC23B   | chr20:18461350 | G-to-A | V-to-I    | IAGAIGPCVSLNVK                    | DNA |
| ATP5E    | chr20:57038877 | A-to-C | Y-to-S    | QAGLSYIR                          | DNA |
| GART     | chr21:33822510 | T-to-A | V-to-E    | FGDPECQVILPLLK                    | DNA |
| MX1      | chr21:41733614 | T-to-G | V-to-G    | VAVGNQPADIGYK                     | DNA |
| MYH9     | chr22:35028580 | T-to-G | W-to-G    | NWQWWR                            | DNA |
| UNC84B   | chr22:37467521 | A-to-T | E-to-V    | IQEELSALR                         | DNA |
| ST13     | chr22:39558575 | T-to-G | C-to-G    | LLGHWEEAAHDLALACK                 | DNA |
| ST13     | chr22:39561567 | C-to-A | A-to-D    | AIEINPDSAQPYK                     | DNA |
| ST13     | chr22:39561775 | A-to-G | I-to-V    | LAILYAK                           | DNA |
| ST13     | chr22:39566612 | G-to-C | D-to-H    | EGVIEPDTDAPQEMGDENAEITEEMMDQANDK  | DNA |
| RANGAP1  | chr22:39982752 | T-to-G | V-to-G    | QVEVINFGDCLVR                     | DNA |
| CCDC58   | chr3:123569761 | T-to-G | N-to-K    | NLDDLTK                           | DNA |
| RPL32    | chr3:12852705  | T-to-C | I-to-T    | SYCAEIAHNVSSK                     | DNA |
| CNBP     | chr3:130372980 | T-to-G | D-to-E    | DCDLQEDACYNCGR                    | DNA |
| NUP210   | chr3:13370113  | A-to-C | T-to-P    | LHGLQAILVHEASGTTAITATATGYQESHSSAR | DNA |
| SR140    | chr3:144228695 | T-to-C | L-to-P    | NLLALIHR                          | DNA |
| RPSA     | chr3:39425116  | A-to-C | N-to-T    | SDGIYIINLK                        | DNA |
| RPSA     | chr3:39425192  | T-to-A | S-to-R    | AIVAIENPADVSVISSR                 | DNA |
| RPSA     | chr3:39427358  | T-to-A | L-to-H    | LLVVTDPR                          | DNA |
| RPL14    | chr3:40474416  | T-to-G | V-to-G    | VAYVSFGPHAGK                      | DNA |
| RPL14    | chr3:40475194  | A-to-G | M-to-V    | CMQLTDFILK                        | DNA |
| LARP7    | chr4:113793691 | G-to-T | A-to-S    | DTLAAISEVLYVDLLEGDTECHAR          | DNA |
| MAD2L1   | chr4:121206413 | A-to-G | I-to-V    | GSAEIVAEFFSFGINSILYQR             | DNA |
| RPS3AP47 | chr4:152243597 | A-to-C | Q-to-P    | TSYAQHQQVR                        | DNA |
| SEPT11   | chr4:78152073  | T-to-C | V-to-A    | SLDLVTMK                          | DNA |
| COPS4    | chr4:84206687  | C-to-T | T-to-I    | LYNNITFEELGALLEIPAAK              | DNA |
| HSPA4    | chr5:132459768 | T-to-G | V-to-G    | TSTVDLPIENQLLWQIDR                | DNA |
| SKP1     | chr5:133524650 | G-to-A | R-to-Q    | RTDDIPVWDQEFLK                    | DNA |
| DDX46    | chr5:134190554 | T-to-G | V-to-G    | IYLAIESANELAVQK                   | DNA |
| LARS     | chr5:145489883 | T-to-G | V-to-G    | ELAVEGMHR                         | DNA |
| NPM1     | chr5:170747595 | G-to-T | R-to-M    | MEDSMDMDMSPLRPQNYLFGCELK          | DNA |
| NPM1     | chr5:170751002 | T-to-C | L-to-P    | VTLATLK                           | DNA |
| NPM1     | chr5:170751328 | G-to-T | G-to-V    | MSVQPTVSLGGFEITPPVVLK             | DNA |
| NPM1     | chr5:170770139 | A-to-G | I-to-V    | MTDQEAIQDLWQWR                    | DNA |
| GNB2L1   | chr5:180597737 | T-to-G | C-to-G    | YWLCAATGPSIK                      | DNA |
| AP3B1    | chr5:77460856  | T-to-C | L-to-P    | LLTQYILNLGK                       | DNA |
| GLRX     | chr5:95178004  | C-to-G | T-to-R    | DCIGGCSDLVSLQQSGELLTR             | DNA |
| SOD2     | chr6:160023556 | T-to-C | W-to-R    | AIWNVINWENVTER                    | DNA |
| GNL1     | chr6:30630380  | T-to-G | V-to-G    | VLEMSDIVLLITDIR                   | DNA |
| HLA-B    | chr6:31431282  | C-to-A | A-to-D    | CWALGFYPAEITLTWQR                 | DNA |

|          |                |        |           |                                                                 |     |
|----------|----------------|--------|-----------|-----------------------------------------------------------------|-----|
| HLA-DRB1 | chr6:32660050  | A-to-C | N-to-H    | YFYNQEESVR                                                      | DNA |
| HLA-DQA1 | chr6:32717985  | A-to-C | D-to-A    | VEHWGLDQPLLK                                                    | DNA |
| HLA-DQB2 | chr6:32833615  | A-to-T | S-to-C    | AQSESAQSK                                                       | DNA |
| PSMB9    | chr6:32933029  | T-to-G | V-to-G    | VSAGEAVVNR                                                      | DNA |
| HLA-DPB1 | chr6:33156435  | C-to-G | L-to-V    | ATPENYL <del>F</del> QGR                                        | DNA |
| RPS10    | chr6:34500537  | A-to-G | Y-to-C    | HFYWYLTNEGIQYLR                                                 | DNA |
| RPS10    | chr6:34500556  | T-to-C | W-to-R    | EQFAWR                                                          | DNA |
| RPL10A   | chr6:35545940  | A-to-G | K-to-R    | KYDAFLASESLIK                                                   | DNA |
| RPL10A   | chr6:35546351  | T-to-A | V-to-E    | VLCLAVAVGHVK                                                    | DNA |
| FKBP5    | chr6:35718537  | A-to-C | T-to-P    | NNEESPTATVAEQGEDITSK                                            | DNA |
| HSP90AB1 | chr6:44325092  | G-to-C | A-to-P    | ELISNASD <del>A</del> LDK                                       | DNA |
| HSP90AB1 | chr6:44325107  | C-to-T | R-to-C    | IRYESLTDPSK                                                     | DNA |
| HSP90AB1 | chr6:44325129  | C-to-T | P-to-L    | YESLTDPSK                                                       | DNA |
| HSP90AB1 | chr6:44325203  | G-to-A | V-to-I    | TLTLVDTGIGMTK                                                   | DNA |
| HSP90AB1 | chr6:44325250  | G-to-T | L-to-F    | ADLINN <del>L</del> G <del>T</del> IAK                          | DNA |
| HSP90AB1 | chr6:44325508  | A-to-T | E-to-V    | HNDDEQYAWESSAGGSFTVR                                            | DNA |
| HSP90AB1 | chr6:44325751  | G-to-A | R-to-K    | ADHGEP <del>I</del> GRG <del>T</del> K                          | DNA |
| HSP90AB1 | chr6:44325769  | T-to-C | L-to-P    | VILHLK                                                          | DNA |
| HSP90AB1 | chr6:44325841  | A-to-T | Q-to-L    | HSQFIGYPITLYLEK                                                 | DNA |
| HSP90AB1 | chr6:44326193  | A-to-T | Q-to-L    | YIDQEELNK                                                       | DNA |
| HSP90AB1 | chr6:44326846  | G-to-T | K-to-N    | APFDLFEN <del>K</del> K                                         | DNA |
| HSP90AB1 | chr6:44326906  | T-to-G | D-to-E    | VFIMDSCDEL <del>I</del> PEYLN <del>F</del> IR                   | DNA |
| HSP90AB1 | chr6:44327720  | G-to-T | S-to-I    | SIYYITGESK                                                      | DNA |
| HSP90AB1 | chr6:44327730  | G-to-T | Q-to-H    | EQVANS <del>A</del> FAFVER                                      | DNA |
| HSP90AB1 | chr6:44327783  | T-to-C | V-to-A    | GFEV <del>V</del> YMTEPID <del>E</del> YCVQQLK                  | DNA |
| HSP90AB1 | chr6:44327939  | T-to-C | L-to-P    | FEN <del>L</del> CK                                             | DNA |
| HSP90AB1 | chr6:44328822  | G-to-C | W-to-C    | LVSSPCCIVTSTY <del>G</del> WTANMER                              | DNA |
| HSP90AB1 | chr6:44328865  | G-to-A | D-to-N    | DNSTMG <del>Y</del> MMAK                                        | DNA |
| HSP90AB1 | chr6:44328998  | T-to-A | L-to-Q    | DLV <del>V</del> LLFETALLSSGFSLEDPQTHSNR                        | DNA |
| PBEF1    | chr7:105700327 | A-to-G | H-to-R    | YDGHLP <del>I</del> IEIK                                        | DNA |
| ATP6V1F  | chr7:128290349 | T-to-C | F-to-S    | DTTINEIEDTFR                                                    | DNA |
| ATP6V1F  | chr7:128292697 | C-to-G | I-to-M    | DDIG <del>I</del> LINQYIAEMVR                                   | DNA |
| AKR1B1   | chr7:133786993 | A-to-C | Y-to-S    | VAIDVGYR                                                        | DNA |
| NUP205   | chr7:134923150 | A-to-C | E-to-A    | DLEHLM <del>L</del> LIGELYK                                     | DNA |
| HIBADH   | chr7:27532390  | T-to-C | F-to-L    | DFSSV <del>F</del> QFLR                                         | DNA |
| HIBADH   | chr7:27655708  | T-to-C | M-to-T    | TPVGF <del>I</del> GLGNMG <del>N</del> PMAK                     | DNA |
| CDC2L5   | chr7:39993857  | T-to-C | L-to-P    | SSLAAELNK                                                       | DNA |
| PPIA     | chr7:44805563  | G-to-A | G-to-S    | GSCFHR                                                          | DNA |
| PPIA     | chr7:44805604  | G-to-C | Q-to-H    | IIPGFMCQGGDFTR                                                  | DNA |
| PPIA     | chr7:44805960  | T-to-A | N-to-K    | HTGPGILSMANAGPNTNGSQFFICTAK                                     | DNA |
| ARPC1B   | chr7:98784468  | G-to-C | W-to-C    | STVLSLDWHPNNVLLAAGSCDFK                                         | DNA |
| PABPCP5  | chr8:101786343 | C-to-G | S-to-STOP | ITGM <del>L</del> LEIDNSELLHMLE <del>S</del> PE <del>S</del> LR | DNA |
| PABPCP5  | chr8:101791093 | T-to-A | C-to-S    | GFGFV <del>C</del> FSSPEEATK                                    | DNA |
| PABPCP5  | chr8:101793816 | G-to-A | E-to-K    | NLDDGIDDER                                                      | DNA |
| PABPCP5  | chr8:101794519 | G-to-T | S-to-I    | GFGFV <del>S</del> FER                                          | DNA |
| PABPCP5  | chr8:101796895 | A-to-T | E-to-V    | NFGEDM <del>D</del> DER                                         | DNA |
| PRKDC    | chr8:48857348  | T-to-G | L-to-R    | LGLIEW <del>L</del> ENTVTLK                                     | DNA |
| PRKDC    | chr8:48896783  | A-to-C | T-to-P    | SLEYC <del>S</del> TASIDSENPPDLNK                               | DNA |
| PRKDC    | chr8:48915208  | T-to-C | V-to-A    | ELLN <del>P</del> V <del>V</del> EFVSH <del>P</del> STTCR       | DNA |
| RPL7     | chr8:74365987  | G-to-A | G-to-E    | YGIICMED <del>L</del> IHEIYTVGK                                 | DNA |
| RPL7     | chr8:74366353  | G-to-T | A-to-S    | IALTDN <del>A</del> LIAR                                        | DNA |
| RPL7     | chr8:74367110  | C-to-T | R-to-STOP | TEIRMAR                                                         | DNA |

|        |                |        |        |                                   |     |
|--------|----------------|--------|--------|-----------------------------------|-----|
| RPL7   | chr8:74367545  | A-to-T | K-to-M | EVP <u>A</u> VPETL <u>K</u> K     | DNA |
| FABP5  | chr8:82358158  | G-to-T | V-to-L | ELG <u>V</u> GIALR                | DNA |
| RPL12  | chr9:129251783 | T-to-G | I-to-S | VGDD <u>I</u> AK                  | DNA |
| RPL12  | chr9:129252841 | C-to-A | P-to-H | IGPLGLSPK                         | DNA |
| SET    | chr9:130493960 | T-to-A | L-to-H | <u>L</u> NEQASEEILK               | DNA |
| SET    | chr9:130494020 | A-to-G | Q-to-R | Q <u>P</u> FFQK                   | DNA |
| SET    | chr9:130494828 | A-to-G | E-to-G | VEVTE <u>F</u> EDIK               | DNA |
| RPL7A  | chr9:135205706 | A-to-T | N-to-Y | NFGIGQDIQPK                       | DNA |
| RPL7A  | chr9:135206928 | T-to-C | V-to-A | AGVNT <u>V</u> TTLVENK            | DNA |
| RPL7A  | chr9:135206953 | A-to-C | K-to-N | <u>K</u> AQLVVIAHDVDPIELVVFLPALCR | DNA |
| RPL7A  | chr9:135206954 | G-to-T | A-to-S | <u>A</u> QLVVIAHDVDPIELVVFLPALCR  | DNA |
| RPL7A  | chr9:135207313 | T-to-C | V-to-A | MG <u>V</u> PYCIK                 | DNA |
| TUBB2C | chr9:139257264 | T-to-C | V-to-A | LAVNM <u>V</u> PFPR               | DNA |
| NUDT2  | chr9:34333284  | A-to-G | E-to-G | TVIYWLA <u>E</u> VK               | DNA |
| ANP32B | chr9:99800767  | A-to-C | T-to-P | DIST <u>L</u> EPLK                | DNA |

Table S6. Most significant Gene Ontology Enrichments for Genes that Have RDD Sites

| <b>GO Group (Molecular Function)</b> | <b>Examples</b>                  | <b>p</b>            |
|--------------------------------------|----------------------------------|---------------------|
| <b>3'-5' DNA helicase activity</b>   | BLM, ERCC3, RECQL, RECQL4, WRN   | 0                   |
| <b>protein binding</b>               | ACBD3, AKT2, DENND4A, IL15, MLX  | $1 \times 10^{-79}$ |
| <b>catalytic activity</b>            | ACLY, CASP3, DHDDS, KDM2A, XRN1  | $3 \times 10^{-37}$ |
| <b>RNA binding</b>                   | APTX, BARD1, EIF1, RBM4, RNASEN  | $5 \times 10^{-37}$ |
| <b>nucleotide binding</b>            | CDK2, CHD1, DARS, PIF1, U2AF1    | $4 \times 10^{-31}$ |
| <b>ATP binding</b>                   | ASS1, ATP11A, CEHK1, GART, KIF11 | $1 \times 10^{-22}$ |

Table S7. Distribution of RDD sites across different genic regions by type.

| Type   | 5' UTR       |      | Coding exon  |      | 3' UTR       |      | Mixed*       |      | Splice       |     | 3' poly A    |      | Total |
|--------|--------------|------|--------------|------|--------------|------|--------------|------|--------------|-----|--------------|------|-------|
|        | No. of sites | %    | No. of sites | %    | No. of sites | %    | No. of sites | %    | No. of sites | %   | No. of sites | %    |       |
| A-to-C | 23           | 3.8  | 334          | 55.5 | 153          | 25.4 | 92           | 15.3 | 20           | 3.3 | 4            | 0.7  | 602   |
| A-to-G | 44           | 1.9  | 984          | 42.3 | 1028         | 44.2 | 272          | 11.7 | 97           | 4.2 | 174          | 7.5  | 2328  |
| A-to-T | 26           | 7.2  | 148          | 41.2 | 104          | 29.0 | 81           | 22.6 | 17           | 4.7 | 7            | 1.9  | 359   |
| C-to-A | 11           | 2.1  | 208          | 39.8 | 220          | 42.1 | 84           | 16.1 | 17           | 4.7 | 77           | 14.7 | 523   |
| C-to-G | 17           | 5.8  | 159          | 53.9 | 79           | 26.8 | 40           | 13.6 | 25           | 8.5 | 10           | 3.4  | 295   |
| C-to-T | 56           | 14.9 | 178          | 47.2 | 78           | 20.7 | 65           | 17.2 | 3            | 0.8 | 4            | 1.1  | 377   |
| G-to-A | 15           | 2.0  | 342          | 44.9 | 292          | 38.3 | 113          | 14.8 | 46           | 6.0 | 73           | 9.6  | 762   |
| G-to-C | 27           | 11.2 | 114          | 47.1 | 56           | 23.1 | 45           | 18.6 | 14           | 5.8 | 2            | 0.8  | 242   |
| G-to-T | 43           | 10.8 | 192          | 48.0 | 110          | 27.5 | 55           | 13.8 | 24           | 6.0 | 3            | 0.8  | 400   |
| T-to-A | 16           | 1.5  | 398          | 36.8 | 550          | 50.8 | 118          | 10.9 | 35           | 3.2 | 90           | 8.3  | 1082  |
| T-to-C | 58           | 2.5  | 953          | 41.8 | 951          | 41.7 | 316          | 13.9 | 33           | 1.4 | 142          | 6.2  | 2278  |
| T-to-G | 50           | 5.2  | 443          | 46.0 | 356          | 37.0 | 113          | 11.7 | 39           | 4.1 | 25           | 2.6  | 962   |

Splice are sites 2 nt within exon borders; Poly(A) are sites within 30 nt 3' of AAUAAA sites

\* Mixed means in some isoforms the sites are in coding exons and in other isoforms they are in UTRs.

Percentages are calculated within each RDD type.

Table S8. Primers used for amplifying and sequencing RDD sites

| <b>Primer Name</b> | <b>RDD sites</b> | <b>Primer Sequence</b>       |
|--------------------|------------------|------------------------------|
| <i>DPP7-F</i>      | Chr9:139128755   | 5'-CAGGAGCGCTTCTCCAGC-3'     |
| <i>DPP7-R</i>      | Chr9:139128755   | 5'-CCGACACCAGGAAGCGC-3'      |
| <i>HLA-DQB2-F1</i> | Chr6:32833537    | 5'-CCTAGGGTGGTCAGACTGGA-3'   |
| <i>HLA-DQB2-R1</i> | Chr6:32833537    | 5'-TTGGGTTCCCTCACCTTTCTG-3'  |
| <i>HLA-DQB2-F2</i> | Chr6:32833545    | 5'-CCTAGGGTGGTCAGACTGGA-3'   |
| <i>HLA-DQB2-R2</i> | Chr6:32833545    | 5'-TTGGGTTCCCTCACCTTTCTG-3'  |
| <i>HLA-DQB2-F3</i> | Chr6:32833550    | 5'-CCTAGGGTGGTCAGACTGGA-3'   |
| <i>HLA-DQB2-R3</i> | Chr6:32833550    | 5'-TTGGGTTCCCTCACCTTTCTG-3'  |
| <i>EIF2AK2-F</i>   | Chr2:37181512    | 5'-CCCCAAGAGCCACATGTATT-3'   |
|                    | Chr2:37181517    |                              |
|                    | Chr2:37181520    |                              |
| <i>EIF2AK2-R</i>   | Chr2:37181512    | 5'- CCTCAAGCTCACTGTCACCA -3' |
|                    | Chr2:37181517    |                              |
|                    | Chr2:37181520    |                              |
| <i>AZIN1-F</i>     | Chr8:103910812   | 5'-TACAAGGAAGATGAGCCTCTG-3'  |
| <i>AZIN1-R</i>     | Chr8:103910812   | 5'-AATAAATGGCTGGCCTCTGA-3'   |
| <i>BLCAP-F</i>     | Chr20:35580977   | 5'-CCCGGCAGAGATCATGTATT-3'   |
| <i>BLCAP-R</i>     | Chr20:35580977   | 5'-AACAGTTTCCCCAGCAGCTA-3'   |
| <i>PPWD1-F</i>     | Chr5:64894960    | 5'-AGCGATTTTCAGCAGAGACG-3'   |
| <i>PPWD1-R</i>     | Chr5:64894960    | 5'-TTCCTCTTCTTGCCAGTGT-3'    |
| <i>NDUFC2-F</i>    | Chr11:77468303   | 5'- ACCAGGCCTCAAGTGGAAAC-3'  |
| <i>NDUFC2-R</i>    | Chr11:77468303   | 5'- AGCCGTCGCGATCGG-3'       |

Table S8B: Primers used for validating the DNA sequences of RDD sites found in peptides

| <b>Primer Name</b> | <b>RDD sites</b> | <b>Primer Sequence</b>          |
|--------------------|------------------|---------------------------------|
| <i>CD22_F</i>      | Chr19:40514815   | 5'-CCCTGCTCAGGCTTGCACCC-3'      |
| <i>CD22_R</i>      | Chr19:40514815   | 5'-GCTGCCCCACCCTACCCTA-3'       |
| <i>DFNA5_F</i>     | Chr7:24705225    | 5'-AGGTTTGGGATTGTGCAGCGCT-3'    |
| <i>DFNA5_R</i>     | Chr7:24705225    | 5'-AGCCTTGGCCAGTAACACGTA-3'     |
| <i>ENO1_F</i>      | Chr1: 8848125    | 5'-ACAGTCCCTGTGTAGCAGCTGT-3'    |
| <i>ENO1_R</i>      | Chr1: 8848125    | 5'-GTCAGCCAGCTGGTCAGGCG-3'      |
| <i>FH_F</i>        | Chr1:239747217   | 5'-AGGCAAGCCAAAATTCCTCCGGA-3'   |
| <i>FH_R</i>        | Chr1:239747217   | 5'-GCCAACATTTCCACAAATGCCACT-3'  |
| <i>HMGB1_F1</i>    | Chr13:29935772   | 5'-GGAGATCCTAAGAAGCCGAGAGGCA-3' |
| <i>HMGB1_R1</i>    | Chr13:29935772   | 5'-AGCGTCCCCTACGAGAATGCCA-3'    |
| <i>HMGB1_F2</i>    | Chr13:29935469   | 5'-TGGCATTCTCGTAGTGGGACGCT-3'   |
| <i>HMGB1_R2</i>    | Chr13:29935469   | 5'-ACGGAGGCCTCTGGGTGCA-3'       |
| <i>ITPR3_F</i>     | Chr6:33755773    | 5'-GTGTGACACGTGCCCCCTCC-3'      |
| <i>ITPR3_R</i>     | Chr6:33755773    | 5'-TGTCCTGGCCTCCGGTTC-3'        |

|                   |                 |                                 |
|-------------------|-----------------|---------------------------------|
| <i>RAD50_F</i>    | Chr5:131979610  | 5'-GCACTTGCTGTCACCAAGTTGCC-3'   |
| <i>RAD50_R</i>    | Chr5:131979610  | 5'-TCTGTGCAGCAGGCTAGCAGA-3'     |
| <i>ROD1_F</i>     | Chr9:114026264  | 5'-TGCGGCCAGGTAGTTGACTC-3'      |
| <i>ROD1_R</i>     | Chr9:114026264  | 5'-AGCGCCATTTTGCATCTTTCCTG-3'   |
| <i>RPL32_F</i>    | Chr3:12852658   | 5'-TGGTGCTGGGACTCATTGCCT-3'     |
| <i>RPL32_R</i>    | Chr3:12852658   | 5'-TCTTCACTGCGCAGCCTGGC-3'      |
| <i>RPS25P8_F</i>  | Chr11:118393375 | 5'-AGGGAAAGGGTGCTTCTGCCA-3'     |
| <i>RPS25P8_R</i>  | Chr11:118393375 | 5'-GAGCTCCTGAAGGGCTGCC-3'       |
| <i>RPS3AP47_F</i> | Chr4:152243651  | 5'-TGCTTCGTCTGTTCTGTGTTGGTT-3'  |
| <i>RPS3AP47_R</i> | Chr4:152243651  | 5'-CAAGGTTGTGTTGTGTGAGGAAGCA-3' |
| <i>SUPT5H_F</i>   | Chr19:44655806  | 5'-TGGCTCCCAGACGCCCATGT-3'      |
| <i>SUPT5H_R</i>   | Chr19:44655806  | 5'-TCACCGTGACGGCGTGTGG-3'       |
| <i>TOR1AIP1_F</i> | Chr1:178144365  | 5'-ACCTGCTTTGCTGTAGGAAGTGGT-3'  |
| <i>TOR1AIP1_R</i> | Chr1:178144365  | 5'-TGGGGCCCATTCCTGGGGAG-3'      |
| <i>TUBA1_F</i>    | Chr2:219823379  | 5'-GCTGAGCAACACGACCGCCA-3'      |
| <i>TUBA1_R</i>    | Chr2:219823379  | 5'-GCAGCAGCAGCATGAAGGGGA-3'     |

Table S9: Detailed mass spectrometry data of peptides shown in Table 3 and Figure 2.

| Protein | Position (bp) | RDD  | AA change | Detected peptide *    | Coded by | Freq of detection | Charge | $\Delta$ Mass (Da) | Peptide Score |
|---------|---------------|------|-----------|-----------------------|----------|-------------------|--------|--------------------|---------------|
| AP2A2   | chr11:976858  | TtoG | YtoD      | YLALESMTLASSEF SHEAVK | DNA      | 7                 | 3      | 0.0064             | 15.91         |
| AP2A2   | chr11:976858  | TtoG | YtoD      | YLALESMTLASSEF SHEAVK | DNA      | 7                 | 3      | 0.0064             | 15.91         |
| AP2A2   | chr11:976858  | TtoG | YtoD      | YLALESMTLASSEF SHEAVK | DNA      | 7                 | 3      | 0.0047             | 11.27         |
| AP2A2   | chr11:976858  | TtoG | YtoD      | YLALESMTLASSEF SHEAVK | DNA      | 7                 | 3      | 0.0047             | 11.27         |
| AP2A2   | chr11:976858  | TtoG | YtoD      | YLALESMTLASSEF SHEAVK | DNA      | 7                 | 3      | 0.0047             | 11.27         |
| AP2A2   | chr11:976858  | TtoG | YtoD      | YLALESMTLASSEF SHEAVK | DNA      | 7                 | 3      | 0.0032             | 16.27         |
| AP2A2   | chr11:976858  | TtoG | YtoD      | YLALESMTLASSEF SHEAVK | DNA      | 7                 | 3      | 0.0032             | 16.27         |
| AP2A2   | chr11:976858  | TtoG | YtoD      | DLALESMTLASSEF SHEAVK | RNA      | 2                 | 4      | -0.0562            | 5.07          |
| AP2A2   | chr11:976858  | TtoG | YtoD      | DLALESMTLASSEF SHEAVK | RNA      | 2                 | 4      | -0.0562            | 5.07          |
| DFNA5   | chr7:24705225 | TtoA | LtoQ      | VFPLLLCITLNLGAL GR    | DNA      | 2                 | 2      | 0.0027             | 40.61         |
| DFNA5   | chr7:24705225 | TtoA | LtoQ      | VFPLLLCITLNLGAL GR    | DNA      | 2                 | 2      | 0.0027             | 40.61         |
| DFNA5   | chr7:24705225 | TtoA | LtoQ      | VFPQLLCITLNLGAL LGR   | RNA      | 1                 | 2      | 0.0671             | 1.72          |
| ENO1    | chr1:8848125  | TtoC | LtoP      | EGLELLK               | DNA      | 16                | 2      | 0.0008             | 24.95         |
| ENO1    | chr1:8848125  | TtoC | LtoP      | EGLELLK               | DNA      | 16                | 2      | 0.0010             | 24.17         |
| ENO1    | chr1:8848125  | TtoC | LtoP      | EGLELLK               | DNA      | 16                | 2      | 0.0013             | 21.31         |
| ENO1    | chr1:8848125  | TtoC | LtoP      | EGLELLK               | DNA      | 16                | 2      | 0.0016             | 28.48         |
| ENO1    | chr1:8848125  | TtoC | LtoP      | EGLELLK               | DNA      | 16                | 2      | 0.0018             | 21.57         |
| ENO1    | chr1:8848125  | TtoC | LtoP      | EGLELLK               | DNA      | 16                | 2      | 0.0146             | 21.87         |
| ENO1    | chr1:8848125  | TtoC | LtoP      | EGLELLK               | DNA      | 16                | 2      | 0.0011             | 37.27         |
| ENO1    | chr1:8848125  | TtoC | LtoP      | EGLELLK               | DNA      | 16                | 2      | 0.0016             | 26.83         |
| ENO1    | chr1:8848125  | TtoC | LtoP      | EGLELLK               | DNA      | 16                | 2      | 0.0145             | 23.26         |
| ENO1    | chr1:8848125  | TtoC | LtoP      | EGLELLK               | DNA      | 16                | 2      | 0.0000             | 12.69         |
| ENO1    | chr1:8848125  | TtoC | LtoP      | EGLELLK               | DNA      | 16                | 2      | 0.0009             | 26.51         |
| ENO1    | chr1:8848125  | TtoC | LtoP      | EGLELLK               | DNA      | 16                | 2      | 0.0011             | 23.68         |
| ENO1    | chr1:8848125  | TtoC | LtoP      | EGLELLK               | DNA      | 16                | 2      | 0.0013             | 22.95         |
| ENO1    | chr1:8848125  | TtoC | LtoP      | EGLELLK               | DNA      | 16                | 2      | 0.0020             | 17.85         |
| ENO1    | chr1:8848125  | TtoC | LtoP      | EGLELLK               | DNA      | 16                | 2      | 0.0150             | 24.41         |
| ENO1    | chr1:8848125  | TtoC | LtoP      | EGLELLK               | DNA      | 16                | 2      | 0.0153             | 28.15         |
| ENO1    | chr1:8848125  | TtoC | LtoP      | EGPELLK               | RNA      | 1                 | 2      | 0.0740             | 26.10         |
| ENO3    | chr17:4800624 | TtoG | VtoG      | LAQSNWGVMSH R         | DNA      | 3                 | 3      | 0.0012             | 5.82          |
| ENO3    | chr17:4800624 | TtoG | VtoG      | LAQSNWGVMSH R         | DNA      | 3                 | 2      | 0.0617             | 2.48          |
| ENO3    | chr17:4800624 | TtoG | VtoG      | LAQSNWGVMSH R         | DNA      | 3                 | 2      | 0.0630             | 1.86          |
| ENO3    | chr17:4800624 | TtoG | VtoG      | LAQSNWGGMVSH R        | RNA      | 4                 | 3      | 0.0124             | 11.72         |
| ENO3    | chr17:4800624 | TtoG | VtoG      | LAQSNWGGMVSH R        | RNA      | 4                 | 3      | -0.0034            | 13.17         |
| ENO3    | chr17:4800624 | TtoG | VtoG      | LAQSNWGGMVSH R        | RNA      | 4                 | 3      | 0.0110             | 17.19         |
| ENO3    | chr17:4800624 | TtoG | VtoG      | LAQSNWGGMVSH R        | RNA      | 4                 | 3      | 0.0129             | 15.35         |
| FABP3   | chr1:31618424 | TtoA | WtoR      | MVDAFLGTWK            | DNA      | 2                 | 2      | -0.0041            | 8.99          |



Table S9

|       |                |      |      |              |     |    |   |         |       |
|-------|----------------|------|------|--------------|-----|----|---|---------|-------|
| FABP3 | chr1:31618424  | TtoA | WtoR | MVDAFLGTWK   | DNA | 2  | 2 | 0.0042  | 4.38  |
| FABP3 | chr1:31618424  | TtoA | WtoR | MVDAFLGTR    | RNA | 24 | 2 | 0.0174  | 12.17 |
| FABP3 | chr1:31618424  | TtoA | WtoR | MVDAFLGTR    | RNA | 24 | 2 | 0.0174  | 13.98 |
| FABP3 | chr1:31618424  | TtoA | WtoR | MVDAFLGTR    | RNA | 24 | 2 | 0.0174  | 18.20 |
| FABP3 | chr1:31618424  | TtoA | WtoR | MVDAFLGTR    | RNA | 24 | 2 | 0.0174  | 7.57  |
| FABP3 | chr1:31618424  | TtoA | WtoR | MVDAFLGTR    | RNA | 24 | 2 | 0.0175  | 13.79 |
| FABP3 | chr1:31618424  | TtoA | WtoR | MVDAFLGTR    | RNA | 24 | 2 | 0.0176  | 15.15 |
| FABP3 | chr1:31618424  | TtoA | WtoR | MVDAFLGTR    | RNA | 24 | 2 | 0.0170  | 10.60 |
| FABP3 | chr1:31618424  | TtoA | WtoR | MVDAFLGTR    | RNA | 24 | 2 | 0.0171  | 11.68 |
| FABP3 | chr1:31618424  | TtoA | WtoR | MVDAFLGTR    | RNA | 24 | 2 | 0.0172  | 15.21 |
| FABP3 | chr1:31618424  | TtoA | WtoR | MVDAFLGTR    | RNA | 24 | 2 | 0.0172  | 9.41  |
| FABP3 | chr1:31618424  | TtoA | WtoR | MVDAFLGTR    | RNA | 24 | 2 | 0.0172  | 9.73  |
| FABP3 | chr1:31618424  | TtoA | WtoR | MVDAFLGTR    | RNA | 24 | 2 | 0.0173  | 20.00 |
| FABP3 | chr1:31618424  | TtoA | WtoR | MVDAFLGTR    | RNA | 24 | 2 | 0.0173  | 11.46 |
| FABP3 | chr1:31618424  | TtoA | WtoR | MVDAFLGTR    | RNA | 24 | 2 | 0.0174  | 11.87 |
| FABP3 | chr1:31618424  | TtoA | WtoR | MVDAFLGTR    | RNA | 24 | 2 | 0.0175  | 17.41 |
| FABP3 | chr1:31618424  | TtoA | WtoR | MVDAFLGTR    | RNA | 24 | 2 | 0.0170  | 13.92 |
| FABP3 | chr1:31618424  | TtoA | WtoR | MVDAFLGTR    | RNA | 24 | 2 | 0.0170  | 11.72 |
| FABP3 | chr1:31618424  | TtoA | WtoR | MVDAFLGTR    | RNA | 24 | 2 | 0.0171  | 10.48 |
| FABP3 | chr1:31618424  | TtoA | WtoR | MVDAFLGTR    | RNA | 24 | 2 | 0.0172  | 8.12  |
| FABP3 | chr1:31618424  | TtoA | WtoR | MVDAFLGTR    | RNA | 24 | 2 | 0.0172  | 7.84  |
| FABP3 | chr1:31618424  | TtoA | WtoR | MVDAFLGTR    | RNA | 24 | 2 | 0.0173  | 9.94  |
| FABP3 | chr1:31618424  | TtoA | WtoR | MVDAFLGTR    | RNA | 24 | 2 | 0.0173  | 9.12  |
| FABP3 | chr1:31618424  | TtoA | WtoR | MVDAFLGTR    | RNA | 24 | 2 | 0.0173  | 11.33 |
| FABP3 | chr1:31618424  | TtoA | WtoR | MVDAFLGTR    | RNA | 24 | 2 | 0.0174  | 12.07 |
| FH    | chr1:239747217 | TtoA | ltoK | IEYDTFGELK   | DNA | 3  | 2 | 0.0018  | 23.88 |
| FH    | chr1:239747217 | TtoA | ltoK | IEYDTFGELK   | DNA | 3  | 2 | 0.0017  | 20.71 |
| FH    | chr1:239747217 | TtoA | ltoK | IEYDTFGELK   | DNA | 3  | 2 | 0.0018  | 19.77 |
| FH    | chr1:239747217 | TtoA | ltoK | KEYDTFGELK   | RNA | 1  | 3 | -0.0794 | 4.41  |
| HMGB1 | chr13:29935772 | TtoA | YtoN | MSSYAFFVQTCR | DNA | 24 | 2 | 0.0040  | 42.74 |
| HMGB1 | chr13:29935772 | TtoA | YtoN | MSSYAFFVQTCR | DNA | 24 | 2 | 0.0046  | 44.19 |
| HMGB1 | chr13:29935772 | TtoA | YtoN | MSSYAFFVQTCR | DNA | 24 | 2 | 0.0043  | 61.30 |
| HMGB1 | chr13:29935772 | TtoA | YtoN | MSSYAFFVQTCR | DNA | 24 | 2 | 0.0059  | 83.92 |
| HMGB1 | chr13:29935772 | TtoA | YtoN | MSSYAFFVQTCR | DNA | 24 | 2 | 0.0040  | 42.74 |
| HMGB1 | chr13:29935772 | TtoA | YtoN | MSSYAFFVQTCR | DNA | 24 | 2 | 0.0046  | 44.19 |
| HMGB1 | chr13:29935772 | TtoA | YtoN | MSSYAFFVQTCR | DNA | 24 | 2 | 0.0043  | 61.30 |
| HMGB1 | chr13:29935772 | TtoA | YtoN | MSSYAFFVQTCR | DNA | 24 | 2 | 0.0059  | 83.92 |
| HMGB1 | chr13:29935772 | TtoA | YtoN | MSSYAFFVQTCR | DNA | 24 | 2 | 0.0040  | 57.69 |
| HMGB1 | chr13:29935772 | TtoA | YtoN | MSSYAFFVQTCR | DNA | 24 | 2 | 0.0043  | 43.15 |
| HMGB1 | chr13:29935772 | TtoA | YtoN | MSSYAFFVQTCR | DNA | 24 | 2 | 0.0037  | 89.34 |
| HMGB1 | chr13:29935772 | TtoA | YtoN | MSSYAFFVQTCR | DNA | 24 | 2 | 0.0040  | 57.69 |
| HMGB1 | chr13:29935772 | TtoA | YtoN | MSSYAFFVQTCR | DNA | 24 | 2 | 0.0043  | 43.15 |
| HMGB1 | chr13:29935772 | TtoA | YtoN | MSSYAFFVQTCR | DNA | 24 | 2 | 0.0037  | 89.34 |
| HMGB1 | chr13:29935772 | TtoA | YtoN | MSSYAFFVQTCR | DNA | 24 | 2 | 0.0036  | 57.77 |
| HMGB1 | chr13:29935772 | TtoA | YtoN | MSSYAFFVQTCR | DNA | 24 | 2 | 0.0040  | 57.65 |
| HMGB1 | chr13:29935772 | TtoA | YtoN | MSSYAFFVQTCR | DNA | 24 | 2 | 0.0031  | 83.97 |
| HMGB1 | chr13:29935772 | TtoA | YtoN | MSSYAFFVQTCR | DNA | 24 | 2 | 0.0042  | 65.97 |
| HMGB1 | chr13:29935772 | TtoA | YtoN | MSSYAFFVQTCR | DNA | 24 | 2 | 0.0047  | 79.01 |

Table S9

|        |                |      |      |                 |     |    |   |         |        |
|--------|----------------|------|------|-----------------|-----|----|---|---------|--------|
| HMGB1  | chr13:29935772 | TtoA | YtoN | MSSYAFFVQTCR    | DNA | 24 | 2 | 0.0036  | 57.77  |
| HMGB1  | chr13:29935772 | TtoA | YtoN | MSSYAFFVQTCR    | DNA | 24 | 2 | 0.0040  | 57.65  |
| HMGB1  | chr13:29935772 | TtoA | YtoN | MSSYAFFVQTCR    | DNA | 24 | 2 | 0.0031  | 83.97  |
| HMGB1  | chr13:29935772 | TtoA | YtoN | MSSYAFFVQTCR    | DNA | 24 | 2 | 0.0042  | 65.97  |
| HMGB1  | chr13:29935772 | TtoA | YtoN | MSSYAFFVQTCR    | DNA | 24 | 2 | 0.0047  | 79.01  |
| HMGB1  | chr13:29935772 | TtoA | YtoN | MSSNAFFVQTCR    | RNA | 2  | 2 | 0.1614  | 7.61   |
| HMGB1  | chr13:29935772 | TtoA | YtoN | MSSNAFFVQTCR    | RNA | 2  | 2 | 0.1616  | 8.23   |
| NACA   | chr12:55392932 | GtoA | DtoN | DIELVMSQANVSR   | DNA | 6  | 2 | 0.0031  | 43.35  |
| NACA   | chr12:55392932 | GtoA | DtoN | DIELVMSQANVSR   | DNA | 6  | 2 | 0.0047  | 47.45  |
| NACA   | chr12:55392932 | GtoA | DtoN | DIELVMSQANVSR   | DNA | 6  | 2 | 0.0032  | 45.96  |
| NACA   | chr12:55392932 | GtoA | DtoN | DIELVMSQANVSR   | DNA | 6  | 2 | 0.0048  | 58.89  |
| NACA   | chr12:55392932 | GtoA | DtoN | DIELVMSQANVSR   | DNA | 6  | 2 | 0.0042  | 67.68  |
| NACA   | chr12:55392932 | GtoA | DtoN | DIELVMSQANVSR   | DNA | 6  | 2 | 0.0043  | 50.81  |
| NACA   | chr12:55392932 | GtoA | DtoN | NIELVMSQANVSR   | RNA | 1  | 3 | -0.0562 | 4.50   |
| NSF    | chr17:42161411 | TtoC | VtoA | LLDYVPIGPR      | DNA | 2  | 2 | 0.0020  | 20.63  |
| NSF    | chr17:42161411 | TtoC | VtoA | LLDYVPIGPR      | DNA | 2  | 2 | 0.0020  | 13.99  |
| NSF    | chr17:42161411 | TtoC | VtoA | LLDYAPIGPR      | RNA | 1  | 2 | -0.0410 | 7.45   |
| POLR2B | chr4:57567852  | TtoA | LtoQ | IISDGLK         | DNA | 3  | 2 | -0.0462 | 20.03  |
| POLR2B | chr4:57567852  | TtoA | LtoQ | IISDGLK         | DNA | 3  | 2 | -0.0360 | 29.85  |
| POLR2B | chr4:57567852  | TtoA | LtoQ | IISDGLK         | DNA | 3  | 2 | 0.0122  | 15.88  |
| POLR2B | chr4:57567852  | TtoA | LtoQ | IISDGQK         | RNA | 1  | 2 | -0.0001 | 21.47  |
| RAD50  | chr5:131979610 | TtoG | LtoR | WLQDNLTR        | DNA | 8  | 2 | -0.1251 | 6.06   |
| RAD50  | chr5:131979610 | TtoG | LtoR | WLQDNLTR        | DNA | 8  | 2 | 0.0001  | 27.35  |
| RAD50  | chr5:131979610 | TtoG | LtoR | WLQDNLTR        | DNA | 8  | 2 | -0.1251 | 6.06   |
| RAD50  | chr5:131979610 | TtoG | LtoR | WLQDNLTR        | DNA | 8  | 2 | 0.0001  | 27.35  |
| RAD50  | chr5:131979610 | TtoG | LtoR | WLQDNLTR        | DNA | 8  | 2 | 0.0003  | 23.67  |
| RAD50  | chr5:131979610 | TtoG | LtoR | WLQDNLTR        | DNA | 8  | 2 | 0.0003  | 23.67  |
| RAD50  | chr5:131979610 | TtoG | LtoR | WLQDNLTR        | DNA | 8  | 2 | 0.0018  | 28.75  |
| RAD50  | chr5:131979610 | TtoG | LtoR | WLQDNLTR        | DNA | 8  | 2 | 0.0018  | 28.75  |
| RAD50  | chr5:131979610 | TtoG | LtoR | WRQDNLTR        | RNA | 2  | 3 | -0.0350 | 6.09   |
| RAD50  | chr5:131979610 | TtoG | LtoR | WRQDNLTR        | RNA | 2  | 3 | -0.0350 | 6.09   |
| RPL12  | chr9:129250509 | AtoG | NtoD | HSGNITFDEIVNIAR | DNA | 26 | 3 | -0.0003 | 15.12  |
| RPL12  | chr9:129250509 | AtoG | NtoD | HSGNITFDEIVNIAR | DNA | 26 | 3 | -0.0001 | 43.51  |
| RPL12  | chr9:129250509 | AtoG | NtoD | HSGNITFDEIVNIAR | DNA | 26 | 3 | 0.0006  | 28.61  |
| RPL12  | chr9:129250509 | AtoG | NtoD | HSGNITFDEIVNIAR | DNA | 26 | 3 | 0.0014  | 33.99  |
| RPL12  | chr9:129250509 | AtoG | NtoD | HSGNITFDEIVNIAR | DNA | 26 | 3 | 0.0025  | 21.98  |
| RPL12  | chr9:129250509 | AtoG | NtoD | HSGNITFDEIVNIAR | DNA | 26 | 2 | 0.0034  | 57.68  |
| RPL12  | chr9:129250509 | AtoG | NtoD | HSGNITFDEIVNIAR | DNA | 26 | 3 | 0.0045  | 41.66  |
| RPL12  | chr9:129250509 | AtoG | NtoD | HSGNITFDEIVNIAR | DNA | 26 | 3 | 0.0056  | 45.13  |
| RPL12  | chr9:129250509 | AtoG | NtoD | HSGNITFDEIVNIAR | DNA | 26 | 2 | 0.0083  | 100.26 |
| RPL12  | chr9:129250509 | AtoG | NtoD | HSGNITFDEIVNIAR | DNA | 26 | 3 | 0.0005  | 23.90  |
| RPL12  | chr9:129250509 | AtoG | NtoD | HSGNITFDEIVNIAR | DNA | 26 | 3 | 0.0010  | 46.97  |
| RPL12  | chr9:129250509 | AtoG | NtoD | HSGNITFDEIVNIAR | DNA | 26 | 3 | 0.0012  | 30.62  |
| RPL12  | chr9:129250509 | AtoG | NtoD | HSGNITFDEIVNIAR | DNA | 26 | 3 | 0.0014  | 23.12  |
| RPL12  | chr9:129250509 | AtoG | NtoD | HSGNITFDEIVNIAR | DNA | 26 | 3 | 0.0025  | 37.96  |
| RPL12  | chr9:129250509 | AtoG | NtoD | HSGNITFDEIVNIAR | DNA | 26 | 3 | 0.0030  | 38.56  |
| RPL12  | chr9:129250509 | AtoG | NtoD | HSGNITFDEIVNIAR | DNA | 26 | 2 | 0.0064  | 94.90  |
| RPL12  | chr9:129250509 | AtoG | NtoD | HSGNITFDEIVNIAR | DNA | 26 | 3 | 0.0067  | 15.42  |

Table S9

|          |                |      |             |                 |     |    |   |         |        |
|----------|----------------|------|-------------|-----------------|-----|----|---|---------|--------|
| RPL12    | chr9:129250509 | AtoG | NtoD        | HSGNITFDEIVNIAR | DNA | 26 | 3 | -0.0010 | 27.48  |
| RPL12    | chr9:129250509 | AtoG | NtoD        | HSGNITFDEIVNIAR | DNA | 26 | 3 | 0.0012  | 34.27  |
| RPL12    | chr9:129250509 | AtoG | NtoD        | HSGNITFDEIVNIAR | DNA | 26 | 3 | 0.0021  | 30.70  |
| RPL12    | chr9:129250509 | AtoG | NtoD        | HSGNITFDEIVNIAR | DNA | 26 | 3 | 0.0026  | 43.71  |
| RPL12    | chr9:129250509 | AtoG | NtoD        | HSGNITFDEIVNIAR | DNA | 26 | 3 | 0.0028  | 38.46  |
| RPL12    | chr9:129250509 | AtoG | NtoD        | HSGNITFDEIVNIAR | DNA | 26 | 3 | 0.0030  | 50.66  |
| RPL12    | chr9:129250509 | AtoG | NtoD        | HSGNITFDEIVNIAR | DNA | 26 | 3 | 0.0045  | 45.89  |
| RPL12    | chr9:129250509 | AtoG | NtoD        | HSGNITFDEIVNIAR | DNA | 26 | 2 | 0.0050  | 50.20  |
| RPL12    | chr9:129250509 | AtoG | NtoD        | HSGNITFDEIVNIAR | DNA | 26 | 2 | 0.0052  | 105.35 |
| RPL12    | chr9:129250509 | AtoG | NtoD        | HSGDITFDEIVNIAR | RNA | 3  | 2 | -0.1040 | 35.41  |
| RPL12    | chr9:129250509 | AtoG | NtoD        | HSGDITFDEIVNIAR | RNA | 3  | 2 | -0.1073 | 36.25  |
| RPL12    | chr9:129250509 | AtoG | NtoD        | HSGDITFDEIVNIAR | RNA | 3  | 2 | -0.1070 | 32.51  |
| RPL28    | chr19:60590467 | TtoA | STOPto<br>R | VFLRSLIGTASEPR  | RNA | 1  | 2 | -0.0767 | 5.25   |
| RPL28    | chr19:60590467 | TtoA | STOPto<br>R | SLIGTASEPR      | RNA | 4  | 2 | 0.0245  | 23.02  |
| RPL28    | chr19:60590467 | TtoA | STOPto<br>R | SLIGTASEPR      | RNA | 4  | 2 | -0.0354 | 22.23  |
| RPL32    | chr3:12852658  | GtoT | AtoS        | AAQLAIR         | DNA | 5  | 2 | 0.0014  | 32.24  |
| RPL32    | chr3:12852658  | GtoT | AtoS        | AAQLAIR         | DNA | 5  | 2 | 0.0018  | 26.72  |
| RPL32    | chr3:12852658  | GtoT | AtoS        | AAQLAIR         | DNA | 5  | 2 | 0.0015  | 32.83  |
| RPL32    | chr3:12852658  | GtoT | AtoS        | AAQLAIR         | DNA | 5  | 2 | 0.0010  | 47.84  |
| RPL32    | chr3:12852658  | GtoT | AtoS        | AAQLAIR         | DNA | 5  | 2 | 0.0014  | 33.36  |
| RPL32    | chr3:12852658  | GtoT | AtoS        | SAQLAIR         | RNA | 1  | 2 | 0.0009  | 19.13  |
| RPS3AP47 | chr4:152243651 | CtoA | TtoK        | EVQTNDLK        | DNA | 11 | 2 | -0.0003 | 33.97  |
| RPS3AP47 | chr4:152243651 | CtoA | TtoK        | EVQTNDLK        | DNA | 11 | 2 | -0.0002 | 20.38  |
| RPS3AP47 | chr4:152243651 | CtoA | TtoK        | EVQTNDLK        | DNA | 11 | 2 | -0.0001 | 31.40  |
| RPS3AP47 | chr4:152243651 | CtoA | TtoK        | EVQTNDLK        | DNA | 11 | 2 | -0.0001 | 32.71  |
| RPS3AP47 | chr4:152243651 | CtoA | TtoK        | EVQTNDLK        | DNA | 11 | 2 | 0.0001  | 16.14  |
| RPS3AP47 | chr4:152243651 | CtoA | TtoK        | EVQTNDLK        | DNA | 11 | 2 | 0.0003  | 20.72  |
| RPS3AP47 | chr4:152243651 | CtoA | TtoK        | EVQTNDLK        | DNA | 11 | 2 | -0.0004 | 14.24  |
| RPS3AP47 | chr4:152243651 | CtoA | TtoK        | EVQTNDLK        | DNA | 11 | 2 | 0.0000  | 20.77  |
| RPS3AP47 | chr4:152243651 | CtoA | TtoK        | EVQTNDLK        | DNA | 11 | 2 | 0.0001  | 13.82  |
| RPS3AP47 | chr4:152243651 | CtoA | TtoK        | EVQTNDLK        | DNA | 11 | 2 | 0.0004  | 23.41  |
| RPS3AP47 | chr4:152243651 | CtoA | TtoK        | EVQTNDLK        | DNA | 11 | 2 | 0.0007  | 29.62  |
| RPS3AP47 | chr4:152243651 | CtoA | TtoK        | EVQKNDLK        | RNA | 2  | 2 | -0.0429 | 30.42  |
| RPS3AP47 | chr4:152243651 | CtoA | TtoK        | EVQKNDLK        | RNA | 2  | 2 | -0.0428 | 27.67  |
| SLC25A17 | chr22:39520485 | AtoG | EtoG        | TTHMVLLLEIK     | DNA | 1  | 2 | -0.1446 | 4.39   |
| SLC25A17 | chr22:39520485 | AtoG | EtoG        | TTHMVLLGLIIK    | RNA | 1  | 3 | -0.0491 | 4.88   |
| TUBA1    | chr2:219823379 | AtoG | EtoG        | EDMAALEK        | DNA | 31 | 2 | -0.0009 | 19.07  |
| TUBA1    | chr2:219823379 | AtoG | EtoG        | EDMAALEK        | DNA | 31 | 2 | 0.0006  | 34.48  |
| TUBA1    | chr2:219823379 | AtoG | EtoG        | EDMAALEK        | DNA | 31 | 2 | 0.0010  | 16.39  |
| TUBA1    | chr2:219823379 | AtoG | EtoG        | EDMAALEK        | DNA | 31 | 2 | 0.0015  | 31.54  |
| TUBA1    | chr2:219823379 | AtoG | EtoG        | EDMAALEK        | DNA | 31 | 2 | 0.0016  | 25.77  |
| TUBA1    | chr2:219823379 | AtoG | EtoG        | EDMAALEK        | DNA | 31 | 2 | 0.0017  | 21.77  |
| TUBA1    | chr2:219823379 | AtoG | EtoG        | EDMAALEK        | DNA | 31 | 2 | -0.0001 | 17.69  |
| TUBA1    | chr2:219823379 | AtoG | EtoG        | EDMAALEK        | DNA | 31 | 2 | 0.0016  | 14.22  |
| TUBA1    | chr2:219823379 | AtoG | EtoG        | EDMAALEK        | DNA | 31 | 2 | -0.0008 | 17.63  |
| TUBA1    | chr2:219823379 | AtoG | EtoG        | EDMAALEK        | DNA | 31 | 2 | -0.0008 | 15.42  |
| TUBA1    | chr2:219823379 | AtoG | EtoG        | EDMAALEK        | DNA | 31 | 2 | -0.0006 | 10.52  |

Table S9

|        |                |      |      |                |     |     |   |         |       |
|--------|----------------|------|------|----------------|-----|-----|---|---------|-------|
| TUBA1  | chr2:219823379 | AtoG | EtoG | EDMAALEK       | DNA | 31  | 2 | -0.0006 | 27.05 |
| TUBA1  | chr2:219823379 | AtoG | EtoG | EDMAALEK       | DNA | 31  | 2 | 0.0001  | 12.06 |
| TUBA1  | chr2:219823379 | AtoG | EtoG | EDMAALEK       | DNA | 31  | 2 | 0.0011  | 32.08 |
| TUBA1  | chr2:219823379 | AtoG | EtoG | EDMAALEK       | DNA | 31  | 2 | 0.0014  | 26.04 |
| TUBA1  | chr2:219823379 | AtoG | EtoG | EDMAALEK       | DNA | 31  | 2 | 0.0016  | 14.62 |
| TUBA1  | chr2:219823379 | AtoG | EtoG | EDMAALEK       | DNA | 31  | 2 | 0.0017  | 18.75 |
| TUBA1  | chr2:219823379 | AtoG | EtoG | EDMAALEK       | DNA | 31  | 2 | 0.0025  | 17.33 |
| TUBA1  | chr2:219823379 | AtoG | EtoG | EDMAALEK       | DNA | 31  | 2 | 0.0026  | 20.57 |
| TUBA1  | chr2:219823379 | AtoG | EtoG | EDMAALEK       | DNA | 31  | 2 | 0.0343  | 8.59  |
| TUBA1  | chr2:219823379 | AtoG | EtoG | EDMAALEK       | DNA | 31  | 2 | -0.0005 | 15.28 |
| TUBA1  | chr2:219823379 | AtoG | EtoG | EDMAALEK       | DNA | 31  | 2 | 0.0001  | 9.12  |
| TUBA1  | chr2:219823379 | AtoG | EtoG | EDMAALEK       | DNA | 31  | 2 | 0.0002  | 15.16 |
| TUBA1  | chr2:219823379 | AtoG | EtoG | EDMAALEK       | DNA | 31  | 2 | 0.0008  | 15.09 |
| TUBA1  | chr2:219823379 | AtoG | EtoG | EDMAALEK       | DNA | 31  | 2 | 0.0001  | 16.37 |
| TUBA1  | chr2:219823379 | AtoG | EtoG | EDMAALEK       | DNA | 31  | 2 | 0.0012  | 30.28 |
| TUBA1  | chr2:219823379 | AtoG | EtoG | EDMAALEK       | DNA | 31  | 2 | 0.0014  | 12.93 |
| TUBA1  | chr2:219823379 | AtoG | EtoG | EDMAALEK       | DNA | 31  | 2 | 0.0016  | 26.93 |
| TUBA1  | chr2:219823379 | AtoG | EtoG | EDMAALEK       | DNA | 31  | 2 | 0.0023  | 21.24 |
| TUBA1  | chr2:219823379 | AtoG | EtoG | EDMAALEK       | DNA | 31  | 2 | 0.0002  | 13.90 |
| TUBA1  | chr2:219823379 | AtoG | EtoG | EDMAALEK       | DNA | 31  | 2 | 0.0018  | 17.39 |
| TUBA1  | chr2:219823379 | AtoG | EtoG | EDMAALGK       | RNA | 1   | 3 | 0.1032  | 6.42  |
| TUBB2C | chr9:139257297 | GtoA | GtoD | LHFFMPGFAPLTSR | DNA | 264 | 3 | -0.0021 | 8.77  |
| TUBB2C | chr9:139257297 | GtoA | GtoD | LHFFMPGFAPLTSR | DNA | 264 | 3 | -0.0010 | 15.43 |
| TUBB2C | chr9:139257297 | GtoA | GtoD | LHFFMPGFAPLTSR | DNA | 264 | 3 | -0.0008 | 28.10 |
| TUBB2C | chr9:139257297 | GtoA | GtoD | LHFFMPGFAPLTSR | DNA | 264 | 3 | -0.0004 | 25.33 |
| TUBB2C | chr9:139257297 | GtoA | GtoD | LHFFMPGFAPLTSR | DNA | 264 | 3 | 0.0001  | 36.31 |
| TUBB2C | chr9:139257297 | GtoA | GtoD | LHFFMPGFAPLTSR | DNA | 264 | 3 | 0.0001  | 20.09 |
| TUBB2C | chr9:139257297 | GtoA | GtoD | LHFFMPGFAPLTSR | DNA | 264 | 3 | 0.0003  | 24.32 |
| TUBB2C | chr9:139257297 | GtoA | GtoD | LHFFMPGFAPLTSR | DNA | 264 | 3 | 0.0009  | 11.26 |
| TUBB2C | chr9:139257297 | GtoA | GtoD | LHFFMPGFAPLTSR | DNA | 264 | 3 | 0.0012  | 19.92 |
| TUBB2C | chr9:139257297 | GtoA | GtoD | LHFFMPGFAPLTSR | DNA | 264 | 3 | 0.0016  | 20.93 |
| TUBB2C | chr9:139257297 | GtoA | GtoD | LHFFMPGFAPLTSR | DNA | 264 | 3 | 0.0025  | 18.10 |
| TUBB2C | chr9:139257297 | GtoA | GtoD | LHFFMPGFAPLTSR | DNA | 264 | 2 | 0.0025  | 27.80 |
| TUBB2C | chr9:139257297 | GtoA | GtoD | LHFFMPGFAPLTSR | DNA | 264 | 3 | 0.0029  | 29.80 |
| TUBB2C | chr9:139257297 | GtoA | GtoD | LHFFMPGFAPLTSR | DNA | 264 | 3 | 0.0031  | 19.29 |
| TUBB2C | chr9:139257297 | GtoA | GtoD | LHFFMPGFAPLTSR | DNA | 264 | 3 | 0.0031  | 23.79 |
| TUBB2C | chr9:139257297 | GtoA | GtoD | LHFFMPGFAPLTSR | DNA | 264 | 3 | 0.0032  | 25.65 |
| TUBB2C | chr9:139257297 | GtoA | GtoD | LHFFMPGFAPLTSR | DNA | 264 | 3 | 0.0040  | 52.24 |
| TUBB2C | chr9:139257297 | GtoA | GtoD | LHFFMPGFAPLTSR | DNA | 264 | 3 | 0.0045  | 48.60 |
| TUBB2C | chr9:139257297 | GtoA | GtoD | LHFFMPGFAPLTSR | DNA | 264 | 2 | 0.0053  | 31.54 |
| TUBB2C | chr9:139257297 | GtoA | GtoD | LHFFMPGFAPLTSR | DNA | 264 | 2 | 0.0061  | 27.78 |
| TUBB2C | chr9:139257297 | GtoA | GtoD | LHFFMPGFAPLTSR | DNA | 264 | 2 | 0.0064  | 29.09 |
| TUBB2C | chr9:139257297 | GtoA | GtoD | LHFFMPGFAPLTSR | DNA | 264 | 2 | 0.0066  | 36.45 |
| TUBB2C | chr9:139257297 | GtoA | GtoD | LHFFMPGFAPLTSR | DNA | 264 | 2 | -0.0827 | 14.94 |
| TUBB2C | chr9:139257297 | GtoA | GtoD | LHFFMPGFAPLTSR | DNA | 264 | 2 | -0.0810 | 10.33 |
| TUBB2C | chr9:139257297 | GtoA | GtoD | LHFFMPGFAPLTSR | DNA | 264 | 3 | 0.0013  | 25.53 |
| TUBB2C | chr9:139257297 | GtoA | GtoD | LHFFMPGFAPLTSR | DNA | 264 | 3 | 0.0026  | 23.66 |
| TUBB2C | chr9:139257297 | GtoA | GtoD | LHFFMPGFAPLTSR | DNA | 264 | 3 | 0.0028  | 15.57 |

Table S9

|        |                |      |      |                |     |     |   |         |       |
|--------|----------------|------|------|----------------|-----|-----|---|---------|-------|
| TUBB2C | chr9:139257297 | GtoA | GtoD | LHFFMPGFAPLTSR | DNA | 264 | 3 | 0.0031  | 16.30 |
| TUBB2C | chr9:139257297 | GtoA | GtoD | LHFFMPGFAPLTSR | DNA | 264 | 3 | 0.0037  | 27.26 |
| TUBB2C | chr9:139257297 | GtoA | GtoD | LHFFMPGFAPLTSR | DNA | 264 | 3 | 0.0041  | 32.68 |
| TUBB2C | chr9:139257297 | GtoA | GtoD | LHFFMPGFAPLTSR | DNA | 264 | 2 | 0.0057  | 35.72 |
| TUBB2C | chr9:139257297 | GtoA | GtoD | LHFFMPGFAPLTSR | DNA | 264 | 2 | 0.0065  | 14.30 |
| TUBB2C | chr9:139257297 | GtoA | GtoD | LHFFMPGFAPLTSR | DNA | 264 | 2 | 0.0076  | 23.60 |
| TUBB2C | chr9:139257297 | GtoA | GtoD | LHFFMPGFAPLTSR | DNA | 264 | 3 | 0.0086  | 14.87 |
| TUBB2C | chr9:139257297 | GtoA | GtoD | LHFFMPGFAPLTSR | DNA | 264 | 3 | -0.0021 | 8.77  |
| TUBB2C | chr9:139257297 | GtoA | GtoD | LHFFMPGFAPLTSR | DNA | 264 | 3 | -0.0010 | 15.43 |
| TUBB2C | chr9:139257297 | GtoA | GtoD | LHFFMPGFAPLTSR | DNA | 264 | 3 | -0.0008 | 28.10 |
| TUBB2C | chr9:139257297 | GtoA | GtoD | LHFFMPGFAPLTSR | DNA | 264 | 3 | -0.0004 | 25.33 |
| TUBB2C | chr9:139257297 | GtoA | GtoD | LHFFMPGFAPLTSR | DNA | 264 | 3 | 0.0001  | 36.31 |
| TUBB2C | chr9:139257297 | GtoA | GtoD | LHFFMPGFAPLTSR | DNA | 264 | 3 | 0.0001  | 20.09 |
| TUBB2C | chr9:139257297 | GtoA | GtoD | LHFFMPGFAPLTSR | DNA | 264 | 3 | 0.0003  | 24.32 |
| TUBB2C | chr9:139257297 | GtoA | GtoD | LHFFMPGFAPLTSR | DNA | 264 | 3 | 0.0009  | 11.26 |
| TUBB2C | chr9:139257297 | GtoA | GtoD | LHFFMPGFAPLTSR | DNA | 264 | 3 | 0.0012  | 19.92 |
| TUBB2C | chr9:139257297 | GtoA | GtoD | LHFFMPGFAPLTSR | DNA | 264 | 3 | 0.0016  | 20.93 |
| TUBB2C | chr9:139257297 | GtoA | GtoD | LHFFMPGFAPLTSR | DNA | 264 | 3 | 0.0025  | 18.10 |
| TUBB2C | chr9:139257297 | GtoA | GtoD | LHFFMPGFAPLTSR | DNA | 264 | 2 | 0.0025  | 27.80 |
| TUBB2C | chr9:139257297 | GtoA | GtoD | LHFFMPGFAPLTSR | DNA | 264 | 3 | 0.0029  | 29.80 |
| TUBB2C | chr9:139257297 | GtoA | GtoD | LHFFMPGFAPLTSR | DNA | 264 | 3 | 0.0031  | 19.29 |
| TUBB2C | chr9:139257297 | GtoA | GtoD | LHFFMPGFAPLTSR | DNA | 264 | 3 | 0.0031  | 23.79 |
| TUBB2C | chr9:139257297 | GtoA | GtoD | LHFFMPGFAPLTSR | DNA | 264 | 3 | 0.0032  | 25.65 |
| TUBB2C | chr9:139257297 | GtoA | GtoD | LHFFMPGFAPLTSR | DNA | 264 | 3 | 0.0040  | 52.24 |
| TUBB2C | chr9:139257297 | GtoA | GtoD | LHFFMPGFAPLTSR | DNA | 264 | 3 | 0.0045  | 48.60 |
| TUBB2C | chr9:139257297 | GtoA | GtoD | LHFFMPGFAPLTSR | DNA | 264 | 2 | 0.0053  | 31.54 |
| TUBB2C | chr9:139257297 | GtoA | GtoD | LHFFMPGFAPLTSR | DNA | 264 | 2 | 0.0061  | 27.78 |
| TUBB2C | chr9:139257297 | GtoA | GtoD | LHFFMPGFAPLTSR | DNA | 264 | 2 | 0.0064  | 29.09 |
| TUBB2C | chr9:139257297 | GtoA | GtoD | LHFFMPGFAPLTSR | DNA | 264 | 2 | 0.0066  | 36.45 |
| TUBB2C | chr9:139257297 | GtoA | GtoD | LHFFMPGFAPLTSR | DNA | 264 | 2 | -0.0827 | 14.94 |
| TUBB2C | chr9:139257297 | GtoA | GtoD | LHFFMPGFAPLTSR | DNA | 264 | 2 | -0.0810 | 10.33 |
| TUBB2C | chr9:139257297 | GtoA | GtoD | LHFFMPGFAPLTSR | DNA | 264 | 3 | 0.0013  | 25.53 |
| TUBB2C | chr9:139257297 | GtoA | GtoD | LHFFMPGFAPLTSR | DNA | 264 | 3 | 0.0026  | 23.66 |
| TUBB2C | chr9:139257297 | GtoA | GtoD | LHFFMPGFAPLTSR | DNA | 264 | 3 | 0.0028  | 15.57 |
| TUBB2C | chr9:139257297 | GtoA | GtoD | LHFFMPGFAPLTSR | DNA | 264 | 3 | 0.0031  | 16.30 |
| TUBB2C | chr9:139257297 | GtoA | GtoD | LHFFMPGFAPLTSR | DNA | 264 | 3 | 0.0037  | 27.26 |
| TUBB2C | chr9:139257297 | GtoA | GtoD | LHFFMPGFAPLTSR | DNA | 264 | 3 | 0.0041  | 32.68 |
| TUBB2C | chr9:139257297 | GtoA | GtoD | LHFFMPGFAPLTSR | DNA | 264 | 2 | 0.0057  | 35.72 |
| TUBB2C | chr9:139257297 | GtoA | GtoD | LHFFMPGFAPLTSR | DNA | 264 | 2 | 0.0065  | 14.30 |
| TUBB2C | chr9:139257297 | GtoA | GtoD | LHFFMPGFAPLTSR | DNA | 264 | 2 | 0.0076  | 23.60 |
| TUBB2C | chr9:139257297 | GtoA | GtoD | LHFFMPGFAPLTSR | DNA | 264 | 3 | 0.0086  | 14.87 |
| TUBB2C | chr9:139257297 | GtoA | GtoD | LHFFMPGFAPLTSR | DNA | 264 | 3 | -0.0021 | 8.77  |
| TUBB2C | chr9:139257297 | GtoA | GtoD | LHFFMPGFAPLTSR | DNA | 264 | 3 | -0.0010 | 15.43 |
| TUBB2C | chr9:139257297 | GtoA | GtoD | LHFFMPGFAPLTSR | DNA | 264 | 3 | -0.0008 | 28.10 |
| TUBB2C | chr9:139257297 | GtoA | GtoD | LHFFMPGFAPLTSR | DNA | 264 | 3 | -0.0004 | 25.33 |
| TUBB2C | chr9:139257297 | GtoA | GtoD | LHFFMPGFAPLTSR | DNA | 264 | 3 | 0.0001  | 36.31 |
| TUBB2C | chr9:139257297 | GtoA | GtoD | LHFFMPGFAPLTSR | DNA | 264 | 3 | 0.0001  | 20.09 |
| TUBB2C | chr9:139257297 | GtoA | GtoD | LHFFMPGFAPLTSR | DNA | 264 | 3 | 0.0003  | 24.32 |

Table S9

|        |                |      |      |                |     |     |   |         |       |
|--------|----------------|------|------|----------------|-----|-----|---|---------|-------|
| TUBB2C | chr9:139257297 | GtoA | GtoD | LHFFMPGFAPLTSR | DNA | 264 | 3 | 0.0009  | 11.26 |
| TUBB2C | chr9:139257297 | GtoA | GtoD | LHFFMPGFAPLTSR | DNA | 264 | 3 | 0.0012  | 19.92 |
| TUBB2C | chr9:139257297 | GtoA | GtoD | LHFFMPGFAPLTSR | DNA | 264 | 3 | 0.0016  | 20.93 |
| TUBB2C | chr9:139257297 | GtoA | GtoD | LHFFMPGFAPLTSR | DNA | 264 | 3 | 0.0025  | 18.10 |
| TUBB2C | chr9:139257297 | GtoA | GtoD | LHFFMPGFAPLTSR | DNA | 264 | 2 | 0.0025  | 27.80 |
| TUBB2C | chr9:139257297 | GtoA | GtoD | LHFFMPGFAPLTSR | DNA | 264 | 3 | 0.0029  | 29.80 |
| TUBB2C | chr9:139257297 | GtoA | GtoD | LHFFMPGFAPLTSR | DNA | 264 | 3 | 0.0031  | 19.29 |
| TUBB2C | chr9:139257297 | GtoA | GtoD | LHFFMPGFAPLTSR | DNA | 264 | 3 | 0.0031  | 23.79 |
| TUBB2C | chr9:139257297 | GtoA | GtoD | LHFFMPGFAPLTSR | DNA | 264 | 3 | 0.0032  | 25.65 |
| TUBB2C | chr9:139257297 | GtoA | GtoD | LHFFMPGFAPLTSR | DNA | 264 | 3 | 0.0040  | 52.24 |
| TUBB2C | chr9:139257297 | GtoA | GtoD | LHFFMPGFAPLTSR | DNA | 264 | 3 | 0.0045  | 48.60 |
| TUBB2C | chr9:139257297 | GtoA | GtoD | LHFFMPGFAPLTSR | DNA | 264 | 2 | 0.0053  | 31.54 |
| TUBB2C | chr9:139257297 | GtoA | GtoD | LHFFMPGFAPLTSR | DNA | 264 | 2 | 0.0061  | 27.78 |
| TUBB2C | chr9:139257297 | GtoA | GtoD | LHFFMPGFAPLTSR | DNA | 264 | 2 | 0.0064  | 29.09 |
| TUBB2C | chr9:139257297 | GtoA | GtoD | LHFFMPGFAPLTSR | DNA | 264 | 2 | 0.0066  | 36.45 |
| TUBB2C | chr9:139257297 | GtoA | GtoD | LHFFMPGFAPLTSR | DNA | 264 | 2 | -0.0827 | 14.94 |
| TUBB2C | chr9:139257297 | GtoA | GtoD | LHFFMPGFAPLTSR | DNA | 264 | 2 | -0.0810 | 10.33 |
| TUBB2C | chr9:139257297 | GtoA | GtoD | LHFFMPGFAPLTSR | DNA | 264 | 3 | 0.0013  | 25.53 |
| TUBB2C | chr9:139257297 | GtoA | GtoD | LHFFMPGFAPLTSR | DNA | 264 | 3 | 0.0026  | 23.66 |
| TUBB2C | chr9:139257297 | GtoA | GtoD | LHFFMPGFAPLTSR | DNA | 264 | 3 | 0.0028  | 15.57 |
| TUBB2C | chr9:139257297 | GtoA | GtoD | LHFFMPGFAPLTSR | DNA | 264 | 3 | 0.0031  | 16.30 |
| TUBB2C | chr9:139257297 | GtoA | GtoD | LHFFMPGFAPLTSR | DNA | 264 | 3 | 0.0037  | 27.26 |
| TUBB2C | chr9:139257297 | GtoA | GtoD | LHFFMPGFAPLTSR | DNA | 264 | 3 | 0.0041  | 32.68 |
| TUBB2C | chr9:139257297 | GtoA | GtoD | LHFFMPGFAPLTSR | DNA | 264 | 2 | 0.0057  | 35.72 |
| TUBB2C | chr9:139257297 | GtoA | GtoD | LHFFMPGFAPLTSR | DNA | 264 | 2 | 0.0065  | 14.30 |
| TUBB2C | chr9:139257297 | GtoA | GtoD | LHFFMPGFAPLTSR | DNA | 264 | 2 | 0.0076  | 23.60 |
| TUBB2C | chr9:139257297 | GtoA | GtoD | LHFFMPGFAPLTSR | DNA | 264 | 3 | 0.0086  | 14.87 |
| TUBB2C | chr9:139257297 | GtoA | GtoD | LHFFMPGFAPLTSR | DNA | 264 | 3 | -0.0019 | 8.51  |
| TUBB2C | chr9:139257297 | GtoA | GtoD | LHFFMPGFAPLTSR | DNA | 264 | 3 | -0.0001 | 34.53 |
| TUBB2C | chr9:139257297 | GtoA | GtoD | LHFFMPGFAPLTSR | DNA | 264 | 3 | 0.0001  | 19.88 |
| TUBB2C | chr9:139257297 | GtoA | GtoD | LHFFMPGFAPLTSR | DNA | 264 | 3 | 0.0003  | 42.44 |
| TUBB2C | chr9:139257297 | GtoA | GtoD | LHFFMPGFAPLTSR | DNA | 264 | 3 | 0.0003  | 21.49 |
| TUBB2C | chr9:139257297 | GtoA | GtoD | LHFFMPGFAPLTSR | DNA | 264 | 3 | 0.0003  | 17.09 |
| TUBB2C | chr9:139257297 | GtoA | GtoD | LHFFMPGFAPLTSR | DNA | 264 | 3 | 0.0005  | 33.72 |
| TUBB2C | chr9:139257297 | GtoA | GtoD | LHFFMPGFAPLTSR | DNA | 264 | 3 | 0.0009  | 9.93  |
| TUBB2C | chr9:139257297 | GtoA | GtoD | LHFFMPGFAPLTSR | DNA | 264 | 3 | 0.0009  | 15.96 |
| TUBB2C | chr9:139257297 | GtoA | GtoD | LHFFMPGFAPLTSR | DNA | 264 | 3 | 0.0029  | 31.30 |
| TUBB2C | chr9:139257297 | GtoA | GtoD | LHFFMPGFAPLTSR | DNA | 264 | 3 | 0.0031  | 29.52 |
| TUBB2C | chr9:139257297 | GtoA | GtoD | LHFFMPGFAPLTSR | DNA | 264 | 3 | 0.0036  | 45.03 |
| TUBB2C | chr9:139257297 | GtoA | GtoD | LHFFMPGFAPLTSR | DNA | 264 | 3 | 0.0036  | 47.38 |
| TUBB2C | chr9:139257297 | GtoA | GtoD | LHFFMPGFAPLTSR | DNA | 264 | 3 | 0.0042  | 15.52 |
| TUBB2C | chr9:139257297 | GtoA | GtoD | LHFFMPGFAPLTSR | DNA | 264 | 2 | 0.0046  | 19.45 |
| TUBB2C | chr9:139257297 | GtoA | GtoD | LHFFMPGFAPLTSR | DNA | 264 | 2 | 0.0052  | 16.97 |
| TUBB2C | chr9:139257297 | GtoA | GtoD | LHFFMPGFAPLTSR | DNA | 264 | 2 | 0.0052  | 29.06 |
| TUBB2C | chr9:139257297 | GtoA | GtoD | LHFFMPGFAPLTSR | DNA | 264 | 2 | 0.0055  | 31.75 |
| TUBB2C | chr9:139257297 | GtoA | GtoD | LHFFMPGFAPLTSR | DNA | 264 | 2 | 0.0057  | 20.63 |
| TUBB2C | chr9:139257297 | GtoA | GtoD | LHFFMPGFAPLTSR | DNA | 264 | 2 | 0.0057  | 34.92 |
| TUBB2C | chr9:139257297 | GtoA | GtoD | LHFFMPGFAPLTSR | DNA | 264 | 2 | 0.0067  | 27.46 |

Table S9

|        |                |      |      |                |     |     |   |         |       |
|--------|----------------|------|------|----------------|-----|-----|---|---------|-------|
| TUBB2C | chr9:139257297 | GtoA | GtoD | LHFFMPGFAPLTSR | DNA | 264 | 2 | 0.0075  | 32.30 |
| TUBB2C | chr9:139257297 | GtoA | GtoD | LHFFMPGFAPLTSR | DNA | 264 | 2 | -0.0811 | 9.40  |
| TUBB2C | chr9:139257297 | GtoA | GtoD | LHFFMPGFAPLTSR | DNA | 264 | 3 | 0.0022  | 21.11 |
| TUBB2C | chr9:139257297 | GtoA | GtoD | LHFFMPGFAPLTSR | DNA | 264 | 3 | 0.0033  | 24.38 |
| TUBB2C | chr9:139257297 | GtoA | GtoD | LHFFMPGFAPLTSR | DNA | 264 | 2 | 0.0036  | 50.49 |
| TUBB2C | chr9:139257297 | GtoA | GtoD | LHFFMPGFAPLTSR | DNA | 264 | 2 | 0.0036  | 20.62 |
| TUBB2C | chr9:139257297 | GtoA | GtoD | LHFFMPGFAPLTSR | DNA | 264 | 3 | 0.0037  | 12.31 |
| TUBB2C | chr9:139257297 | GtoA | GtoD | LHFFMPGFAPLTSR | DNA | 264 | 3 | 0.0039  | 22.61 |
| TUBB2C | chr9:139257297 | GtoA | GtoD | LHFFMPGFAPLTSR | DNA | 264 | 2 | 0.0039  | 34.30 |
| TUBB2C | chr9:139257297 | GtoA | GtoD | LHFFMPGFAPLTSR | DNA | 264 | 2 | 0.0052  | 27.70 |
| TUBB2C | chr9:139257297 | GtoA | GtoD | LHFFMPGFAPLTSR | DNA | 264 | 2 | 0.0299  | 14.64 |
| TUBB2C | chr9:139257297 | GtoA | GtoD | LHFFMPGFAPLTSR | DNA | 264 | 3 | -0.0019 | 8.51  |
| TUBB2C | chr9:139257297 | GtoA | GtoD | LHFFMPGFAPLTSR | DNA | 264 | 3 | -0.0001 | 34.53 |
| TUBB2C | chr9:139257297 | GtoA | GtoD | LHFFMPGFAPLTSR | DNA | 264 | 3 | 0.0001  | 19.88 |
| TUBB2C | chr9:139257297 | GtoA | GtoD | LHFFMPGFAPLTSR | DNA | 264 | 3 | 0.0003  | 42.44 |
| TUBB2C | chr9:139257297 | GtoA | GtoD | LHFFMPGFAPLTSR | DNA | 264 | 3 | 0.0003  | 21.49 |
| TUBB2C | chr9:139257297 | GtoA | GtoD | LHFFMPGFAPLTSR | DNA | 264 | 3 | 0.0003  | 17.09 |
| TUBB2C | chr9:139257297 | GtoA | GtoD | LHFFMPGFAPLTSR | DNA | 264 | 3 | 0.0005  | 33.72 |
| TUBB2C | chr9:139257297 | GtoA | GtoD | LHFFMPGFAPLTSR | DNA | 264 | 3 | 0.0009  | 9.93  |
| TUBB2C | chr9:139257297 | GtoA | GtoD | LHFFMPGFAPLTSR | DNA | 264 | 3 | 0.0009  | 15.96 |
| TUBB2C | chr9:139257297 | GtoA | GtoD | LHFFMPGFAPLTSR | DNA | 264 | 3 | 0.0029  | 31.30 |
| TUBB2C | chr9:139257297 | GtoA | GtoD | LHFFMPGFAPLTSR | DNA | 264 | 3 | 0.0031  | 29.52 |
| TUBB2C | chr9:139257297 | GtoA | GtoD | LHFFMPGFAPLTSR | DNA | 264 | 3 | 0.0036  | 45.03 |
| TUBB2C | chr9:139257297 | GtoA | GtoD | LHFFMPGFAPLTSR | DNA | 264 | 3 | 0.0036  | 47.38 |
| TUBB2C | chr9:139257297 | GtoA | GtoD | LHFFMPGFAPLTSR | DNA | 264 | 3 | 0.0042  | 15.52 |
| TUBB2C | chr9:139257297 | GtoA | GtoD | LHFFMPGFAPLTSR | DNA | 264 | 2 | 0.0046  | 19.45 |
| TUBB2C | chr9:139257297 | GtoA | GtoD | LHFFMPGFAPLTSR | DNA | 264 | 2 | 0.0052  | 16.97 |
| TUBB2C | chr9:139257297 | GtoA | GtoD | LHFFMPGFAPLTSR | DNA | 264 | 2 | 0.0052  | 29.06 |
| TUBB2C | chr9:139257297 | GtoA | GtoD | LHFFMPGFAPLTSR | DNA | 264 | 2 | 0.0055  | 31.75 |
| TUBB2C | chr9:139257297 | GtoA | GtoD | LHFFMPGFAPLTSR | DNA | 264 | 2 | 0.0057  | 20.63 |
| TUBB2C | chr9:139257297 | GtoA | GtoD | LHFFMPGFAPLTSR | DNA | 264 | 2 | 0.0057  | 34.92 |
| TUBB2C | chr9:139257297 | GtoA | GtoD | LHFFMPGFAPLTSR | DNA | 264 | 2 | 0.0067  | 27.46 |
| TUBB2C | chr9:139257297 | GtoA | GtoD | LHFFMPGFAPLTSR | DNA | 264 | 2 | 0.0075  | 32.30 |
| TUBB2C | chr9:139257297 | GtoA | GtoD | LHFFMPGFAPLTSR | DNA | 264 | 2 | -0.0811 | 9.40  |
| TUBB2C | chr9:139257297 | GtoA | GtoD | LHFFMPGFAPLTSR | DNA | 264 | 3 | 0.0022  | 21.11 |
| TUBB2C | chr9:139257297 | GtoA | GtoD | LHFFMPGFAPLTSR | DNA | 264 | 3 | 0.0033  | 24.38 |
| TUBB2C | chr9:139257297 | GtoA | GtoD | LHFFMPGFAPLTSR | DNA | 264 | 2 | 0.0036  | 50.49 |
| TUBB2C | chr9:139257297 | GtoA | GtoD | LHFFMPGFAPLTSR | DNA | 264 | 2 | 0.0036  | 20.62 |
| TUBB2C | chr9:139257297 | GtoA | GtoD | LHFFMPGFAPLTSR | DNA | 264 | 3 | 0.0037  | 12.31 |
| TUBB2C | chr9:139257297 | GtoA | GtoD | LHFFMPGFAPLTSR | DNA | 264 | 3 | 0.0039  | 22.61 |
| TUBB2C | chr9:139257297 | GtoA | GtoD | LHFFMPGFAPLTSR | DNA | 264 | 2 | 0.0039  | 34.30 |
| TUBB2C | chr9:139257297 | GtoA | GtoD | LHFFMPGFAPLTSR | DNA | 264 | 2 | 0.0052  | 27.70 |
| TUBB2C | chr9:139257297 | GtoA | GtoD | LHFFMPGFAPLTSR | DNA | 264 | 2 | 0.0299  | 14.64 |
| TUBB2C | chr9:139257297 | GtoA | GtoD | LHFFMPGFAPLTSR | DNA | 264 | 3 | -0.0019 | 8.51  |
| TUBB2C | chr9:139257297 | GtoA | GtoD | LHFFMPGFAPLTSR | DNA | 264 | 3 | -0.0001 | 34.53 |
| TUBB2C | chr9:139257297 | GtoA | GtoD | LHFFMPGFAPLTSR | DNA | 264 | 3 | 0.0001  | 19.88 |
| TUBB2C | chr9:139257297 | GtoA | GtoD | LHFFMPGFAPLTSR | DNA | 264 | 3 | 0.0003  | 42.44 |
| TUBB2C | chr9:139257297 | GtoA | GtoD | LHFFMPGFAPLTSR | DNA | 264 | 3 | 0.0003  | 21.49 |

Table S9

|        |                |      |      |                |     |     |   |         |       |
|--------|----------------|------|------|----------------|-----|-----|---|---------|-------|
| TUBB2C | chr9:139257297 | GtoA | GtoD | LHFFMPGFAPLTSR | DNA | 264 | 3 | 0.0003  | 17.09 |
| TUBB2C | chr9:139257297 | GtoA | GtoD | LHFFMPGFAPLTSR | DNA | 264 | 3 | 0.0005  | 33.72 |
| TUBB2C | chr9:139257297 | GtoA | GtoD | LHFFMPGFAPLTSR | DNA | 264 | 3 | 0.0009  | 9.93  |
| TUBB2C | chr9:139257297 | GtoA | GtoD | LHFFMPGFAPLTSR | DNA | 264 | 3 | 0.0009  | 15.96 |
| TUBB2C | chr9:139257297 | GtoA | GtoD | LHFFMPGFAPLTSR | DNA | 264 | 3 | 0.0029  | 31.30 |
| TUBB2C | chr9:139257297 | GtoA | GtoD | LHFFMPGFAPLTSR | DNA | 264 | 3 | 0.0031  | 29.52 |
| TUBB2C | chr9:139257297 | GtoA | GtoD | LHFFMPGFAPLTSR | DNA | 264 | 3 | 0.0036  | 45.03 |
| TUBB2C | chr9:139257297 | GtoA | GtoD | LHFFMPGFAPLTSR | DNA | 264 | 3 | 0.0036  | 47.38 |
| TUBB2C | chr9:139257297 | GtoA | GtoD | LHFFMPGFAPLTSR | DNA | 264 | 3 | 0.0042  | 15.52 |
| TUBB2C | chr9:139257297 | GtoA | GtoD | LHFFMPGFAPLTSR | DNA | 264 | 2 | 0.0046  | 19.45 |
| TUBB2C | chr9:139257297 | GtoA | GtoD | LHFFMPGFAPLTSR | DNA | 264 | 2 | 0.0052  | 16.97 |
| TUBB2C | chr9:139257297 | GtoA | GtoD | LHFFMPGFAPLTSR | DNA | 264 | 2 | 0.0052  | 29.06 |
| TUBB2C | chr9:139257297 | GtoA | GtoD | LHFFMPGFAPLTSR | DNA | 264 | 2 | 0.0055  | 31.75 |
| TUBB2C | chr9:139257297 | GtoA | GtoD | LHFFMPGFAPLTSR | DNA | 264 | 2 | 0.0057  | 20.63 |
| TUBB2C | chr9:139257297 | GtoA | GtoD | LHFFMPGFAPLTSR | DNA | 264 | 2 | 0.0057  | 34.92 |
| TUBB2C | chr9:139257297 | GtoA | GtoD | LHFFMPGFAPLTSR | DNA | 264 | 2 | 0.0067  | 27.46 |
| TUBB2C | chr9:139257297 | GtoA | GtoD | LHFFMPGFAPLTSR | DNA | 264 | 2 | 0.0075  | 32.30 |
| TUBB2C | chr9:139257297 | GtoA | GtoD | LHFFMPGFAPLTSR | DNA | 264 | 2 | -0.0811 | 9.40  |
| TUBB2C | chr9:139257297 | GtoA | GtoD | LHFFMPGFAPLTSR | DNA | 264 | 3 | 0.0022  | 21.11 |
| TUBB2C | chr9:139257297 | GtoA | GtoD | LHFFMPGFAPLTSR | DNA | 264 | 3 | 0.0033  | 24.38 |
| TUBB2C | chr9:139257297 | GtoA | GtoD | LHFFMPGFAPLTSR | DNA | 264 | 2 | 0.0036  | 50.49 |
| TUBB2C | chr9:139257297 | GtoA | GtoD | LHFFMPGFAPLTSR | DNA | 264 | 2 | 0.0036  | 20.62 |
| TUBB2C | chr9:139257297 | GtoA | GtoD | LHFFMPGFAPLTSR | DNA | 264 | 3 | 0.0037  | 12.31 |
| TUBB2C | chr9:139257297 | GtoA | GtoD | LHFFMPGFAPLTSR | DNA | 264 | 3 | 0.0039  | 22.61 |
| TUBB2C | chr9:139257297 | GtoA | GtoD | LHFFMPGFAPLTSR | DNA | 264 | 2 | 0.0039  | 34.30 |
| TUBB2C | chr9:139257297 | GtoA | GtoD | LHFFMPGFAPLTSR | DNA | 264 | 2 | 0.0052  | 27.70 |
| TUBB2C | chr9:139257297 | GtoA | GtoD | LHFFMPGFAPLTSR | DNA | 264 | 2 | 0.0299  | 14.64 |
| TUBB2C | chr9:139257297 | GtoA | GtoD | LHFFMPGFAPLTSR | DNA | 264 | 3 | -0.0013 | 23.13 |
| TUBB2C | chr9:139257297 | GtoA | GtoD | LHFFMPGFAPLTSR | DNA | 264 | 3 | -0.0002 | 43.30 |
| TUBB2C | chr9:139257297 | GtoA | GtoD | LHFFMPGFAPLTSR | DNA | 264 | 3 | -0.0002 | 19.85 |
| TUBB2C | chr9:139257297 | GtoA | GtoD | LHFFMPGFAPLTSR | DNA | 264 | 3 | 0.0001  | 41.03 |
| TUBB2C | chr9:139257297 | GtoA | GtoD | LHFFMPGFAPLTSR | DNA | 264 | 3 | 0.0003  | 16.09 |
| TUBB2C | chr9:139257297 | GtoA | GtoD | LHFFMPGFAPLTSR | DNA | 264 | 3 | 0.0005  | 26.95 |
| TUBB2C | chr9:139257297 | GtoA | GtoD | LHFFMPGFAPLTSR | DNA | 264 | 3 | 0.0007  | 44.30 |
| TUBB2C | chr9:139257297 | GtoA | GtoD | LHFFMPGFAPLTSR | DNA | 264 | 3 | 0.0007  | 32.25 |
| TUBB2C | chr9:139257297 | GtoA | GtoD | LHFFMPGFAPLTSR | DNA | 264 | 3 | 0.0009  | 27.28 |
| TUBB2C | chr9:139257297 | GtoA | GtoD | LHFFMPGFAPLTSR | DNA | 264 | 3 | 0.0018  | 16.56 |
| TUBB2C | chr9:139257297 | GtoA | GtoD | LHFFMPGFAPLTSR | DNA | 264 | 3 | 0.0020  | 16.41 |
| TUBB2C | chr9:139257297 | GtoA | GtoD | LHFFMPGFAPLTSR | DNA | 264 | 3 | 0.0025  | 23.94 |
| TUBB2C | chr9:139257297 | GtoA | GtoD | LHFFMPGFAPLTSR | DNA | 264 | 3 | 0.0027  | 21.94 |
| TUBB2C | chr9:139257297 | GtoA | GtoD | LHFFMPGFAPLTSR | DNA | 264 | 3 | 0.0027  | 13.67 |
| TUBB2C | chr9:139257297 | GtoA | GtoD | LHFFMPGFAPLTSR | DNA | 264 | 2 | 0.0035  | 14.46 |
| TUBB2C | chr9:139257297 | GtoA | GtoD | LHFFMPGFAPLTSR | DNA | 264 | 3 | 0.0036  | 59.52 |
| TUBB2C | chr9:139257297 | GtoA | GtoD | LHFFMPGFAPLTSR | DNA | 264 | 3 | 0.0047  | 34.07 |
| TUBB2C | chr9:139257297 | GtoA | GtoD | LHFFMPGFAPLTSR | DNA | 264 | 2 | 0.0047  | 27.94 |
| TUBB2C | chr9:139257297 | GtoA | GtoD | LHFFMPGFAPLTSR | DNA | 264 | 2 | 0.0048  | 49.04 |
| TUBB2C | chr9:139257297 | GtoA | GtoD | LHFFMPGFAPLTSR | DNA | 264 | 3 | 0.0049  | 33.06 |
| TUBB2C | chr9:139257297 | GtoA | GtoD | LHFFMPGFAPLTSR | DNA | 264 | 2 | 0.0057  | 34.01 |



Table S9

|        |                |      |      |                |     |     |   |         |       |
|--------|----------------|------|------|----------------|-----|-----|---|---------|-------|
| TUBB2C | chr9:139257297 | GtoA | GtoD | LHFFMPGFAPLTSR | DNA | 264 | 2 | 0.0068  | 27.76 |
| TUBB2C | chr9:139257297 | GtoA | GtoD | LHFFMPGFAPLTSR | DNA | 264 | 2 | 0.0072  | 30.54 |
| TUBB2C | chr9:139257297 | GtoA | GtoD | LHFFMPGFAPLTSR | DNA | 264 | 2 | 0.0075  | 24.86 |
| TUBB2C | chr9:139257297 | GtoA | GtoD | LHFFMPGFAPLTSR | DNA | 264 | 2 | -0.0815 | 12.31 |
| TUBB2C | chr9:139257297 | GtoA | GtoD | LHFFMPGFAPLTSR | DNA | 264 | 3 | 0.0022  | 21.58 |
| TUBB2C | chr9:139257297 | GtoA | GtoD | LHFFMPGFAPLTSR | DNA | 264 | 3 | 0.0030  | 21.24 |
| TUBB2C | chr9:139257297 | GtoA | GtoD | LHFFMPGFAPLTSR | DNA | 264 | 3 | 0.0030  | 12.17 |
| TUBB2C | chr9:139257297 | GtoA | GtoD | LHFFMPGFAPLTSR | DNA | 264 | 3 | 0.0031  | 21.96 |
| TUBB2C | chr9:139257297 | GtoA | GtoD | LHFFMPGFAPLTSR | DNA | 264 | 2 | 0.0037  | 24.23 |
| TUBB2C | chr9:139257297 | GtoA | GtoD | LHFFMPGFAPLTSR | DNA | 264 | 2 | 0.0058  | 47.62 |
| TUBB2C | chr9:139257297 | GtoA | GtoD | LHFFMPGFAPLTSR | DNA | 264 | 3 | 0.0095  | 12.66 |
| TUBB2C | chr9:139257297 | GtoA | GtoD | LHFFMPGFAPLTSR | DNA | 264 | 2 | 0.0314  | 26.62 |
| TUBB2C | chr9:139257297 | GtoA | GtoD | LHFFMPGFAPLTSR | DNA | 264 | 3 | -0.0013 | 23.13 |
| TUBB2C | chr9:139257297 | GtoA | GtoD | LHFFMPGFAPLTSR | DNA | 264 | 3 | -0.0002 | 43.30 |
| TUBB2C | chr9:139257297 | GtoA | GtoD | LHFFMPGFAPLTSR | DNA | 264 | 3 | -0.0002 | 19.85 |
| TUBB2C | chr9:139257297 | GtoA | GtoD | LHFFMPGFAPLTSR | DNA | 264 | 3 | 0.0001  | 41.03 |
| TUBB2C | chr9:139257297 | GtoA | GtoD | LHFFMPGFAPLTSR | DNA | 264 | 3 | 0.0003  | 16.09 |
| TUBB2C | chr9:139257297 | GtoA | GtoD | LHFFMPGFAPLTSR | DNA | 264 | 3 | 0.0005  | 26.95 |
| TUBB2C | chr9:139257297 | GtoA | GtoD | LHFFMPGFAPLTSR | DNA | 264 | 3 | 0.0007  | 44.30 |
| TUBB2C | chr9:139257297 | GtoA | GtoD | LHFFMPGFAPLTSR | DNA | 264 | 3 | 0.0007  | 32.25 |
| TUBB2C | chr9:139257297 | GtoA | GtoD | LHFFMPGFAPLTSR | DNA | 264 | 3 | 0.0009  | 27.28 |
| TUBB2C | chr9:139257297 | GtoA | GtoD | LHFFMPGFAPLTSR | DNA | 264 | 3 | 0.0018  | 16.56 |
| TUBB2C | chr9:139257297 | GtoA | GtoD | LHFFMPGFAPLTSR | DNA | 264 | 3 | 0.0020  | 16.41 |
| TUBB2C | chr9:139257297 | GtoA | GtoD | LHFFMPGFAPLTSR | DNA | 264 | 3 | 0.0025  | 23.94 |
| TUBB2C | chr9:139257297 | GtoA | GtoD | LHFFMPGFAPLTSR | DNA | 264 | 3 | 0.0027  | 21.94 |
| TUBB2C | chr9:139257297 | GtoA | GtoD | LHFFMPGFAPLTSR | DNA | 264 | 3 | 0.0027  | 13.67 |
| TUBB2C | chr9:139257297 | GtoA | GtoD | LHFFMPGFAPLTSR | DNA | 264 | 2 | 0.0035  | 14.46 |
| TUBB2C | chr9:139257297 | GtoA | GtoD | LHFFMPGFAPLTSR | DNA | 264 | 3 | 0.0036  | 59.52 |
| TUBB2C | chr9:139257297 | GtoA | GtoD | LHFFMPGFAPLTSR | DNA | 264 | 3 | 0.0047  | 34.07 |
| TUBB2C | chr9:139257297 | GtoA | GtoD | LHFFMPGFAPLTSR | DNA | 264 | 2 | 0.0047  | 27.94 |
| TUBB2C | chr9:139257297 | GtoA | GtoD | LHFFMPGFAPLTSR | DNA | 264 | 2 | 0.0048  | 49.04 |
| TUBB2C | chr9:139257297 | GtoA | GtoD | LHFFMPGFAPLTSR | DNA | 264 | 3 | 0.0049  | 33.06 |
| TUBB2C | chr9:139257297 | GtoA | GtoD | LHFFMPGFAPLTSR | DNA | 264 | 2 | 0.0057  | 34.01 |
| TUBB2C | chr9:139257297 | GtoA | GtoD | LHFFMPGFAPLTSR | DNA | 264 | 2 | 0.0068  | 27.76 |
| TUBB2C | chr9:139257297 | GtoA | GtoD | LHFFMPGFAPLTSR | DNA | 264 | 2 | 0.0072  | 30.54 |
| TUBB2C | chr9:139257297 | GtoA | GtoD | LHFFMPGFAPLTSR | DNA | 264 | 2 | 0.0075  | 24.86 |
| TUBB2C | chr9:139257297 | GtoA | GtoD | LHFFMPGFAPLTSR | DNA | 264 | 2 | -0.0815 | 12.31 |
| TUBB2C | chr9:139257297 | GtoA | GtoD | LHFFMPGFAPLTSR | DNA | 264 | 3 | 0.0022  | 21.58 |
| TUBB2C | chr9:139257297 | GtoA | GtoD | LHFFMPGFAPLTSR | DNA | 264 | 3 | 0.0030  | 21.24 |
| TUBB2C | chr9:139257297 | GtoA | GtoD | LHFFMPGFAPLTSR | DNA | 264 | 3 | 0.0030  | 12.17 |
| TUBB2C | chr9:139257297 | GtoA | GtoD | LHFFMPGFAPLTSR | DNA | 264 | 3 | 0.0031  | 21.96 |
| TUBB2C | chr9:139257297 | GtoA | GtoD | LHFFMPGFAPLTSR | DNA | 264 | 2 | 0.0037  | 24.23 |
| TUBB2C | chr9:139257297 | GtoA | GtoD | LHFFMPGFAPLTSR | DNA | 264 | 2 | 0.0058  | 47.62 |
| TUBB2C | chr9:139257297 | GtoA | GtoD | LHFFMPGFAPLTSR | DNA | 264 | 3 | 0.0095  | 12.66 |
| TUBB2C | chr9:139257297 | GtoA | GtoD | LHFFMPGFAPLTSR | DNA | 264 | 2 | 0.0314  | 26.62 |
| TUBB2C | chr9:139257297 | GtoA | GtoD | LHFFMPDFAPLTSR | RNA | 1   | 3 | 0.0224  | 12.97 |

\* When multiple peptides are matched to the same spectra, only the best matched peptides were retained.

| Table S10. Information on 10,210 exonic RDD sites |             |                  |                                                                                      |        |      |           |           |                                |            |                |
|---------------------------------------------------|-------------|------------------|--------------------------------------------------------------------------------------|--------|------|-----------|-----------|--------------------------------|------------|----------------|
| site                                              | gene        | location in gene | nonsynonymous amino acid change                                                      | strand | type | min level | max level | no. of informative individuals | no. of RDD | coverage range |
| chr15:65281199                                    | AAGAB       | UTR3             |                                                                                      | -      | TtoC | 0.1034    | 0.1212    | 7                              | 2          | [29,34]        |
| chr2:69546830                                     | AAK1        | coding_exon      |                                                                                      | -      | TtoC | 0.1       | 0.1176    | 2                              | 2          | [10,17]        |
| chr11:105467314                                   | AASDHPPT    | coding_exon      | ENST00000278618:LtoH;                                                                | +      | TtoA | 0.1111    | 0.15      | 7                              | 2          | [10,22]        |
| chr11:105473792                                   | AASDHPPT    | UTR3             |                                                                                      | +      | AtoG | 0.1212    | 0.1579    | 5                              | 2          | [19,33]        |
| chr17:64759484                                    | ABCA5       | coding_exon      | ENST00000320086:Rto*;ENST00000392676:Rto*;ENST00000392677:Rto*;                      | -      | AtoT | 0.1667    | 0.1667    | 5                              | 2          | [12,18]        |
| chr17:64758216                                    | ABCA5       | coding_exon      |                                                                                      | -      | TtoC | 0.1       | 0.1111    | 6                              | 2          | [10,19]        |
| chr17:64772579                                    | ABCA5       | coding_exon      |                                                                                      | -      | AtoG | 0.1       | 0.2       | 2                              | 2          | [10,10]        |
| chr1:227732777                                    | ABCB10      | coding_exon      | ENST00000344517:EtoD;                                                                | -      | GtoT | 0.1       | 0.1818    | 2                              | 2          | [10,11]        |
| chr1:227743063                                    | ABCB10      | coding_exon      |                                                                                      | -      | TtoC | 0.1       | 0.1       | 2                              | 2          | [10,10]        |
| chr2:219783953                                    | ABCB6       | mixed            |                                                                                      | -      | AtoG | 0.1538    | 0.1818    | 3                              | 2          | [11,13]        |
| chr13:94522008                                    | ABCC4       | coding_exon      | ENST00000376887:VtoA;ENST00000412704:VtoA;                                           | -      | TtoC | 0.1       | 0.1176    | 3                              | 2          | [10,17]        |
| chr13:94628026                                    | ABCC4       | coding_exon      | ENST00000376887:VtoA;ENST00000412704:VtoA;ENST00000431522:VtoV;                      | -      | AtoG | 0.1       | 0.1       | 2                              | 2          | [10,10]        |
| chr13:94611475                                    | ABCC4       | coding_exon      |                                                                                      | -      | TtoC | 0.1       | 0.3636    | 4                              | 4          | [10,17]        |
| chr13:94470328                                    | ABCC4       | UTR3             |                                                                                      | -      | AtoG | 0.1       | 0.1       | 2                              | 2          | [10,10]        |
| chr1:94736821                                     | ABCD3       | coding_exon      | ENST00000370214:Eto*;ENST00000394233:Eto*;ENST00000454898:Eto*;                      | +      | GtoT | 0.1       | 0.1       | 2                              | 2          | [10,10]        |
| chr14:73829263                                    | ABCD4       | coding_exon      | ENST00000356924:VtoV;                                                                | -      | AtoG | 0.1       | 0.1053    | 4                              | 3          | [10,19]        |
| chr6:30666455                                     | ABCF1       | coding_exon      | ENST00000326195:*toG;ENST00000376545:*toG;ENST00000396515:*toG;ENST00000396515:*toG; | +      | TtoG | 0.1042    | 0.2143    | 6                              | 3          | [14,48]        |
| chr6:30666459                                     | ABCF1       | UTR3             |                                                                                      | +      | CtoG | 0.1176    | 0.75      | 8                              | 6          | [12,51]        |
| chr6:30667067                                     | ABCF1       | UTR3             |                                                                                      | +      | GtoA | 0.1429    | 0.1739    | 4                              | 2          | [21,23]        |
| chr6:30667068                                     | ABCF1       | UTR3             |                                                                                      | +      | AtoC | 0.1667    | 0.1875    | 5                              | 2          | [12,33]        |
| chr6:30667069                                     | ABCF1       | UTR3             |                                                                                      | +      | CtoA | 0.1111    | 0.1765    | 16                             | 6          | [16,25]        |
| chr3:113188564                                    | ABHD10      | coding_exon      |                                                                                      | +      | AtoG | 0.1034    | 0.2727    | 6                              | 2          | [11,31]        |
| chr15:87544259                                    | ABHD2       | UTR3             |                                                                                      | +      | AtoT | 0.1       | 0.2       | 2                              | 2          | [10,10]        |
| chr15:87544475                                    | ABHD2       | UTR3             |                                                                                      | +      | CtoT | 0.1       | 0.1       | 3                              | 2          | [10,10]        |
| chr19:17266526                                    | ABHD8       | coding_exon      | ENST00000247706:VtoD;                                                                | -      | TtoA | 0.1       | 0.1053    | 2                              | 2          | [10,19]        |
| chr10:27080699                                    | ABI1        | coding_exon      |                                                                                      | -      | AtoC | 0.125     | 0.1333    | 4                              | 2          | [15,16]        |
| chr10:27076915                                    | ABI1        | UTR3             |                                                                                      | -      | CtoA | 0.125     | 0.5       | 4                              | 3          | [10,24]        |
| chr10:27076916                                    | ABI1        | UTR3             |                                                                                      | -      | GtoA | 0.1786    | 0.5455    | 3                              | 3          | [11,28]        |
| chr2:204000148                                    | ABI2        | coding_exon      | ENST00000261016:VtoA;ENST00000261017:VtoA;ENST00000261018:VtoA;ENST00000261019:VtoA; | +      | TtoC | 0.1176    | 0.1818    | 5                              | 2          | [17,22]        |
| chr17:44649031                                    | ABI3        | coding_exon      | ENST00000225941:VtoG;ENST00000419580:VtoG;                                           | +      | TtoG | 0.125     | 0.1667    | 2                              | 2          | [12,16]        |
| chr9:132740222                                    | ABL1        | coding_exon      | ENST00000318560:LtoP;ENST00000372348:LtoP;                                           | +      | TtoC | 0.1       | 0.1053    | 4                              | 2          | [10,19]        |
| chr9:132751920                                    | ABL1        | UTR3             |                                                                                      | +      | TtoA | 0.1       | 0.1429    | 4                              | 3          | [10,15]        |
| chr10:116181193                                   | ABLIM1      | UTR3             |                                                                                      | -      | TtoC | 0.1       | 0.1       | 3                              | 2          | [10,10]        |
| chr10:116181687                                   | ABLIM1      | UTR3             |                                                                                      | -      | TtoG | 0.1176    | 0.2       | 5                              | 2          | [10,17]        |
| chr10:116182367                                   | ABLIM1      | UTR3             |                                                                                      | -      | TtoC | 0.1071    | 0.1429    | 3                              | 2          | [14,28]        |
| chr6:26707284                                     | ABT1        | UTR3             |                                                                                      | +      | TtoC | 0.1       | 0.1111    | 6                              | 2          | [10,18]        |
| chr3:128882122                                    | ABTB1       | mixed            |                                                                                      | +      | TtoC | 0.1       | 0.1538    | 2                              | 2          | [10,13]        |
| chr16:30501419                                    | AC002310.1  | mixed            |                                                                                      | +      | AtoG | 0.1538    | 0.1667    | 3                              | 2          | [12,13]        |
| chr4:107236216                                    | AC004053.1  | coding_exon      | ENST00000273980:NtoD;ENST00000361687:NtoD;ENST00000394706:NtoD;ENST00000394707:NtoD; | -      | AtoG | 0.1       | 0.1       | 2                              | 2          | [10,10]        |
| chr5:132057267                                    | AC004237.1  | mixed            |                                                                                      | +      | TtoC | 0.1       | 0.2       | 5                              | 2          | [10,10]        |
| chr19:2222437                                     | AC004490.1  | mixed            |                                                                                      | -      | CtoG | 0.1379    | 0.6897    | 8                              | 8          | [13,90]        |
| chr19:2222438                                     | AC004490.1  | mixed            |                                                                                      | -      | GtoA | 0.2787    | 0.8571    | 8                              | 8          | [16,105]       |
| chr19:2222443                                     | AC004490.1  | mixed            |                                                                                      | -      | CtoA | 0.125     | 0.3529    | 9                              | 8          | [17,89]        |
| chr19:2222444                                     | AC004490.1  | mixed            |                                                                                      | -      | TtoG | 0.102     | 0.2667    | 8                              | 5          | [15,104]       |
| chr7:26379209                                     | AC004540.2  | mixed            |                                                                                      | -      | AtoG | 0.1       | 0.1       | 3                              | 2          | [10,10]        |
| chr22:30052353                                    | AC005003.1  | mixed            |                                                                                      | +      | AtoG | 0.1111    | 0.1304    | 3                              | 2          | [18,23]        |
| chr7:20145716                                     | AC005062.2  | mixed            |                                                                                      | -      | GtoA | 0.1       | 0.125     | 4                              | 2          | [10,16]        |
| chr7:30556922                                     | AC005154.3  | mixed            |                                                                                      | +      | TtoC | 0.1       | 0.2105    | 3                              | 2          | [10,19]        |
| chr19:45016939                                    | AC005393.1  | UTR3             |                                                                                      | -      | TtoC | 0.1034    | 0.2564    | 18                             | 17         | [23,220]       |
| chr19:2462261                                     | AC005512.3  | mixed            |                                                                                      | +      | AtoC | 0.1818    | 0.2       | 3                              | 2          | [10,11]        |
| chr17:23965631                                    | AC005726.9  | mixed            |                                                                                      | +      | TtoC | 0.1053    | 0.3       | 7                              | 6          | [10,38]        |
| chr19:2377561                                     | AC005756.1  | mixed            |                                                                                      | +      | TtoC | 0.1       | 0.2857    | 4                              | 4          | [10,14]        |
| chr19:2377562                                     | AC005756.1  | mixed            |                                                                                      | +      | CtoT | 0.125     | 0.4545    | 10                             | 10         | [11,20]        |
| chr19:2428671                                     | AC005756.1  | mixed            |                                                                                      | +      | TtoC | 0.2632    | 0.4444    | 6                              | 3          | [18,25]        |
| chr19:2428672                                     | AC005756.1  | mixed            |                                                                                      | +      | CtoT | 0.125     | 0.1923    | 3                              | 2          | [16,26]        |
| chr17:46151975                                    | AC005921.2  | coding_exon      | ENST00000449192:GtoE;                                                                | -      | GtoA | 0.1       | 0.1       | 2                              | 2          | [10,10]        |
| chr17:46183303                                    | AC005921.3  | UTR3             |                                                                                      | +      | TtoC | 0.1071    | 0.2       | 13                             | 8          | [10,37]        |
| chr17:46184267                                    | AC005921.3  | UTR3             |                                                                                      | +      | TtoC | 0.1       | 0.1111    | 6                              | 4          | [10,20]        |
| chr17:46184649                                    | AC005921.3  | UTR3             |                                                                                      | +      | TtoC | 0.1       | 0.1818    | 2                              | 2          | [10,11]        |
| chr17:46184653                                    | AC005921.3  | UTR3             |                                                                                      | +      | AtoG | 0.1       | 0.1923    | 14                             | 6          | [20,44]        |
| chr2:39534955                                     | AC007246.1  | mixed            |                                                                                      | +      | AtoT | 0.1       | 0.1       | 2                              | 2          | [10,10]        |
| chr2:37284893                                     | AC007390.3  | UTR3             |                                                                                      | +      | AtoG | 0.15      | 0.1818    | 4                              | 2          | [20,22]        |
| chr7:91925857                                     | AC007566.2  | mixed            |                                                                                      | +      | AtoG | 0.1034    | 0.1111    | 6                              | 2          | [27,29]        |
| chr5:140980642                                    | AC008781.3  | mixed            |                                                                                      | +      | AtoG | 0.125     | 0.7143    | 2                              | 2          | [14,17]        |
| chr19:42545457                                    | AC008806.1  | coding_exon      | ENST00000324411:GtoE;ENST00000392153:GtoE;                                           | +      | GtoA | 0.1       | 0.1176    | 3                              | 3          | [10,17]        |
| chr16:85122790                                    | AC009108.2  | mixed            |                                                                                      | -      | TtoG | 0.1       | 0.1       | 3                              | 2          | [10,10]        |
| chr16:29729960                                    | AC009133.1  | coding_exon      |                                                                                      | -      | AtoT | 0.1053    | 0.1667    | 5                              | 2          | [18,20]        |
| chr16:29729987                                    | AC009133.1  | coding_exon      |                                                                                      | -      | AtoT | 0.4       | 0.5833    | 2                              | 2          | [11,12]        |
| chr16:29729988                                    | AC009133.1  | coding_exon      |                                                                                      | -      | AtoT | 0.1667    | 0.6       | 2                              | 2          | [10,12]        |
| chr16:75790975                                    | AC009139.1  | coding_exon      |                                                                                      | +      | TtoC | 0.1053    | 0.2963    | 19                             | 14         | [11,31]        |
| chr16:75791335                                    | AC009139.1  | coding_exon      |                                                                                      | +      | AtoC | 0.1       | 0.1818    | 3                              | 2          | [10,11]        |
| chr2:95559577                                     | AC009237.15 | mixed            |                                                                                      | +      | TtoC | 0.6667    | 0.9565    | 4                              | 4          | [11,23]        |
| chr2:95559595                                     | AC009237.15 | mixed            |                                                                                      | +      | TtoA | 0.8636    | 1         | 14                             | 14         | [10,38]        |
| chr2:84986290                                     | AC010087.3  | mixed            |                                                                                      | -      | AtoC | 0.1429    | 0.2143    | 3                              | 2          | [14,14]        |
| chr2:84987302                                     | AC010087.3  | mixed            |                                                                                      | -      | AtoG | 0.1009    | 0.1094    | 4                              | 2          | [66,110]       |
| chr2:84987306                                     | AC010087.3  | mixed            |                                                                                      | -      | TtoC | 0.1765    | 0.4       | 13                             | 12         | [15,51]        |
| chr19:56013359                                    | AC010325.3  | UTR5             |                                                                                      | +      | GtoA | 0.1176    | 0.1481    | 2                              | 2          | [17,28]        |
| chr19:12639888                                    | AC010422.1  | UTR5             |                                                                                      | +      | AtoG | 0.1176    | 0.125     | 4                              | 2          | [16,18]        |
| chr19:12639890                                    | AC010422.1  | UTR5             |                                                                                      | +      | AtoG | 0.1176    | 0.1765    | 5                              | 3          | [17,20]        |
| chr19:12639910                                    | AC010422.1  | UTR5             |                                                                                      | +      | AtoG | 0.1111    | 0.1562    | 10                             | 2          | [18,33]        |
| chr5:532527                                       | AC010442.1  | mixed            |                                                                                      | +      | AtoC | 0.1       | 0.1       | 2                              | 2          | [10,10]        |
| chr16:85893971                                    | AC010531.3  | UTR3             |                                                                                      | -      | TtoA | 0.1       | 0.1       | 2                              | 2          | [10,10]        |
| chr16:11838711                                    | AC010654.1  | coding_exon      | ENST00000426336:MtoI;                                                                | +      | GtoT | 0.2727    | 0.4615    | 2                              | 2          | [12,13]        |
| chr10:103576230                                   | AC010789.3  | mixed            |                                                                                      | +      | AtoC | 0.1111    | 0.1667    | 2                              | 2          | [10,12]        |
| chr2:26472064                                     | AC010896.1  | UTR3             |                                                                                      | +      | CtoT | 0.5263    | 0.7222    | 3                              | 2          | [18,19]        |
| chr7:150404437                                    | AC010973.2  | mixed            |                                                                                      | -      | AtoT | 0.1111    | 0.1667    | 4                              | 2          | [10,12]        |
| chr19:6162781                                     | AC011471.1  | mixed            |                                                                                      | -      | GtoA | 0.1       | 0.1818    | 2                              | 2          | [10,11]        |
| chr19:19764636                                    | AC011477.2  | UTR3             |                                                                                      | -      | TtoC | 0.1       | 0.5       | 9                              | 8          | [10,25]        |
| chr19:19764653                                    | AC011477.2  | UTR3             |                                                                                      | -      | AtoG | 0.2727    | 0.75      | 6                              | 5          | [11,21]        |
| chr2:198279813                                    | AC011997.1  | coding_exon      |                                                                                      | +      | TtoC | 0.125     | 0.2727    | 3                              | 2          | [11,16]        |
| chr15:48805810                                    | AC012100.1  | coding_exon      |                                                                                      | -      | GtoA | 0.1176    | 0.1379    | 4                              | 2          | [17,29]        |

|                |            |             |                                                                                                                                                                                               |   |      |        |        |    |    |             |
|----------------|------------|-------------|-----------------------------------------------------------------------------------------------------------------------------------------------------------------------------------------------|---|------|--------|--------|----|----|-------------|
| chr15:48805813 | AC012100.1 | coding_exon |                                                                                                                                                                                               | - | AtoG | 0.1111 | 0.1212 | 4  | 2  | [18,33]     |
| chr12:97531790 | AC013283.1 | mixed       |                                                                                                                                                                                               | - | TtoC | 0.1    | 0.1    | 3  | 2  | [10,11]     |
| chr17:53422008 | AC015813.1 | coding_exon | ENST00000414925:VtoL;                                                                                                                                                                         | - | GtoT | 0.2    | 0.2222 | 2  | 2  | [10,20]     |
| chr17:53422007 | AC015813.1 | coding_exon | ENST00000414925:VtoE;                                                                                                                                                                         | - | TtoA | 0.1667 | 0.2    | 2  | 2  | [10,18]     |
| chr3:151941692 | AC016142.1 | mixed       |                                                                                                                                                                                               | + | AtoG | 0.1333 | 0.2    | 7  | 4  | [16,30]     |
| chr19:63787013 | AC016629.3 | UTR5        |                                                                                                                                                                                               | + | CtoT | 0.1    | 0.1    | 2  | 2  | [10,10]     |
| chr17:43360315 | AC018521.1 | mixed       |                                                                                                                                                                                               | - | AtoG | 0.1    | 0.1111 | 2  | 2  | [10,18]     |
| chr2:122201354 | AC018737.4 | mixed       |                                                                                                                                                                                               | + | AtoT | 0.125  | 0.1667 | 3  | 2  | [12,17]     |
| chr19:56899506 | AC018755.7 | coding_exon | ENST00000417847:LtoP;                                                                                                                                                                         | + | TtoC | 0.1    | 0.1111 | 2  | 2  | [10,18]     |
| chr2:175134050 | AC018890.2 | mixed       |                                                                                                                                                                                               | + | AtoT | 0.1    | 0.1333 | 4  | 2  | [10,15]     |
| chr2:175134052 | AC018890.2 | mixed       |                                                                                                                                                                                               | + | TtoC | 0.1304 | 0.1538 | 7  | 2  | [13,23]     |
| chr2:33641492  | AC020594.2 | mixed       |                                                                                                                                                                                               | - | TtoA | 0.1    | 0.2941 | 5  | 3  | [10,17]     |
| chr2:33641569  | AC020594.2 | mixed       |                                                                                                                                                                                               | - | AtoG | 0.1154 | 0.5833 | 7  | 5  | [12,26]     |
| chr16:4807611  | AC020663.1 | coding_exon | ENST00000321919:TtoA;ENST00000381983:TtoA;ENST00000436648:TtoA;ENST00000321919:MtoT;                                                                                                          | - | AtoG | 0.1053 | 0.1111 | 3  | 2  | [18,38]     |
| chr16:4837266  | AC020663.1 | coding_exon | ENST00000321919:MtoT;ENST00000381983:MtoT;ENST00000436648:MtoT;ENST00000321919:TtoA;ENST00000381983:TtoA;ENST00000436648:TtoA;ENST00000321919:MtoT;                                           | - | TtoC | 0.15   | 0.1818 | 3  | 3  | [11,20]     |
| chr16:4837265  | AC020663.1 | coding_exon | ENST00000321919:MtoI;ENST00000381983:MtoI;ENST00000436648:MtoI;ENST00000321919:TtoA;ENST00000381983:TtoA;ENST00000436648:TtoA;ENST00000321919:MtoI;                                           | - | GtoT | 0.125  | 0.1429 | 3  | 2  | [24,28]     |
| chr16:4835123  | AC020663.1 | coding_exon |                                                                                                                                                                                               | - | TtoC | 0.1481 | 0.1818 | 4  | 2  | [11,27]     |
| chr5:148854163 | AC021078.3 | mixed       |                                                                                                                                                                                               | - | AtoG | 0.1818 | 0.2105 | 5  | 2  | [11,20]     |
| chr5:14885469  | AC021078.3 | mixed       |                                                                                                                                                                                               | - | AtoC | 0.1    | 0.1538 | 3  | 2  | [10,13]     |
| chr17:73617397 | AC021593.2 | mixed       |                                                                                                                                                                                               | - | CtoG | 0.1    | 0.1    | 2  | 2  | [10,10]     |
| chr10:75243755 | AC022400.4 | mixed       |                                                                                                                                                                                               | + | AtoG | 0.1    | 0.1429 | 3  | 2  | [10,14]     |
| chr12:54513584 | AC023055.2 | coding_exon | ENST00000379625:HtoR;                                                                                                                                                                         | + | AtoG | 0.1    | 0.1818 | 2  | 2  | [10,11]     |
| chr15:81598476 | AC024270.1 | UTR3        |                                                                                                                                                                                               | - | TtoA | 0.1    | 0.1538 | 2  | 2  | [10,13]     |
| chr19:11323733 | AC024575.3 | mixed       |                                                                                                                                                                                               | + | AtoG | 0.1    | 0.2143 | 3  | 2  | [10,14]     |
| chr5:32265517  | AC025181.1 | mixed       |                                                                                                                                                                                               | - | TtoC | 0.1    | 0.1    | 3  | 2  | [10,10]     |
| chr12:63376543 | AC025262.1 | mixed       |                                                                                                                                                                                               | - | AtoT | 0.125  | 0.2143 | 2  | 2  | [14,16]     |
| chr17:6853865  | AC027763.1 | coding_exon | ENST00000399540:LtoP;ENST00000399541:LtoP;                                                                                                                                                    | - | TtoC | 0.1    | 0.1538 | 2  | 2  | [10,13]     |
| chr3:195843153 | AC046143.1 | mixed       |                                                                                                                                                                                               | + | AtoT | 0.1    | 0.1    | 3  | 2  | [10,10]     |
| chr3:195843909 | AC046143.1 | mixed       |                                                                                                                                                                                               | + | TtoG | 0.3889 | 0.7    | 2  | 2  | [18,20]     |
| chr17:5377951  | AC055839.1 | coding_exon | ENST00000262467:RtoS;ENST00000269280:RtoS;ENST00000345221:RtoS;ENST00000262467:TtoA;ENST00000269280:TtoA;ENST00000345221:TtoA;ENST00000262467:MtoT;ENST00000269280:MtoT;ENST00000345221:MtoT; | - | AtoT | 0.1    | 0.1    | 2  | 2  | [10,10]     |
| chr7:130280164 | AC058791.1 | mixed       |                                                                                                                                                                                               | - | AtoG | 0.4    | 0.9286 | 5  | 5  | [11,18]     |
| chr7:130280166 | AC058791.1 | mixed       |                                                                                                                                                                                               | - | AtoG | 0.4167 | 0.7    | 5  | 4  | [10,21]     |
| chr17:3856523  | AC067815.1 | mixed       |                                                                                                                                                                                               | + | TtoG | 0.381  | 0.625  | 2  | 2  | [21,24]     |
| chr17:3856959  | AC067815.1 | mixed       |                                                                                                                                                                                               | + | TtoG | 0.1    | 0.1818 | 3  | 3  | [10,20]     |
| chr8:144716364 | AC067930.1 | mixed       |                                                                                                                                                                                               | + | AtoG | 0.1176 | 0.1667 | 3  | 2  | [12,17]     |
| chr8:144733380 | AC067930.1 | mixed       |                                                                                                                                                                                               | + | TtoA | 0.1    | 0.1905 | 11 | 6  | [44,133]    |
| chr8:61696667  | AC068389.1 | mixed       |                                                                                                                                                                                               | - | CtoT | 0.1    | 0.1818 | 4  | 2  | [10,11]     |
| chr8:61696761  | AC068389.1 | mixed       |                                                                                                                                                                                               | - | TtoC | 0.1    | 0.1    | 3  | 2  | [10,10]     |
| chr8:61696958  | AC068389.1 | mixed       |                                                                                                                                                                                               | - | AtoT | 0.1    | 0.1667 | 4  | 3  | [10,13]     |
| chr2:74039548  | AC073046.3 | mixed       |                                                                                                                                                                                               | - | AtoG | 0.125  | 0.1333 | 5  | 2  | [15,16]     |
| chr7:149770570 | AC073111.1 | mixed       |                                                                                                                                                                                               | + | AtoG | 0.2727 | 0.4    | 3  | 2  | [10,11]     |
| chr7:149774909 | AC073111.1 | mixed       |                                                                                                                                                                                               | + | CtoG | 0.1    | 0.2    | 2  | 2  | [10,10]     |
| chr7:149774910 | AC073111.1 | mixed       |                                                                                                                                                                                               | + | TtoG | 0.1667 | 0.25   | 4  | 3  | [11,13]     |
| chr7:115685336 | AC073130.3 | mixed       |                                                                                                                                                                                               | - | AtoG | 0.1    | 0.1538 | 4  | 2  | [10,13]     |
| chr7:115685340 | AC073130.3 | mixed       |                                                                                                                                                                                               | - | TtoC | 0.1562 | 0.25   | 8  | 2  | [12,32]     |
| chr7:115685341 | AC073130.3 | mixed       |                                                                                                                                                                                               | - | AtoT | 0.1    | 0.1053 | 4  | 3  | [10,20]     |
| chr7:115685837 | AC073130.3 | mixed       |                                                                                                                                                                                               | - | TtoC | 0.1    | 0.2    | 5  | 2  | [10,10]     |
| chr2:233155899 | AC073254.1 | mixed       |                                                                                                                                                                                               | - | TtoC | 0.1    | 0.1    | 2  | 2  | [10,10]     |
| chr2:224540123 | AC073641.1 | mixed       |                                                                                                                                                                                               | - | TtoC | 0.1    | 0.125  | 3  | 2  | [10,16]     |
| chr2:64310188  | AC074289.1 | mixed       |                                                                                                                                                                                               | + | TtoC | 0.125  | 0.125  | 2  | 2  | [16,16]     |
| chr2:64332175  | AC074289.1 | mixed       |                                                                                                                                                                                               | + | TtoA | 0.1    | 0.1    | 3  | 2  | [11,20]     |
| chr2:64332474  | AC074289.1 | mixed       |                                                                                                                                                                                               | + | TtoC | 0.1    | 0.1765 | 4  | 2  | [10,17]     |
| chr8:26284299  | AC079097.1 | mixed       |                                                                                                                                                                                               | - | CtoA | 0.1053 | 0.1111 | 2  | 2  | [18,19]     |
| chr7:129562544 | AC087071.2 | mixed       |                                                                                                                                                                                               | + | TtoC | 0.1053 | 0.1538 | 6  | 2  | [13,19]     |
| chr17:25599580 | AC087644.3 | mixed       |                                                                                                                                                                                               | + | AtoC | 0.1316 | 0.8333 | 5  | 5  | [17,43]     |
| chr17:25599950 | AC087644.3 | mixed       |                                                                                                                                                                                               | + | AtoG | 0.1304 | 0.1818 | 8  | 3  | [12,23]     |
| chr17:4119467  | AC087742.2 | UTR3        |                                                                                                                                                                                               | - | TtoA | 0.1667 | 0.2308 | 2  | 2  | [13,13]     |
| chr17:4120227  | AC087742.2 | UTR3        |                                                                                                                                                                                               | - | AtoG | 0.1    | 0.1053 | 5  | 2  | [10,19]     |
| chr17:4122316  | AC087742.2 | UTR3        |                                                                                                                                                                                               | - | TtoA | 0.1071 | 0.2353 | 6  | 2  | [17,29]     |
| chr17:27493841 | AC090616.1 | coding_exon | ENST00000398832:RtoC;                                                                                                                                                                         | - | CtoT | 0.3077 | 0.3333 | 2  | 2  | [12,13]     |
| chr18:19952164 | AC090772.3 | mixed       |                                                                                                                                                                                               | + | TtoC | 0.1071 | 0.1724 | 5  | 3  | [14,29]     |
| chr3:14959512  | AC090937.1 | mixed       |                                                                                                                                                                                               | - | TtoC | 0.1    | 0.1    | 2  | 2  | [10,10]     |
| chr17:40111151 | AC091152.2 | mixed       |                                                                                                                                                                                               | + | GtoA | 0.1    | 0.1    | 2  | 2  | [10,10]     |
| chr17:40122478 | AC091152.2 | mixed       |                                                                                                                                                                                               | + | AtoG | 0.1    | 0.1111 | 6  | 2  | [10,18]     |
| chr5:3561952   | AC091947.1 | mixed       |                                                                                                                                                                                               | + | CtoG | 0.175  | 0.1818 | 2  | 2  | [11,81]     |
| chr5:3561954   | AC091947.1 | mixed       |                                                                                                                                                                                               | + | TtoG | 0.381  | 0.4762 | 2  | 2  | [21,22]     |
| chr3:52302157  | AC092045.1 | mixed       |                                                                                                                                                                                               | - | TtoC | 0.1667 | 0.1818 | 3  | 2  | [11,12]     |
| chr3:42653839  | AC092047.3 | mixed       |                                                                                                                                                                                               | - | TtoC | 0.12   | 0.1818 | 2  | 2  | [11,25]     |
| chr3:42659887  | AC092047.3 | mixed       |                                                                                                                                                                                               | - | AtoT | 0.1034 | 0.1538 | 7  | 3  | [14,30]     |
| chr3:42659888  | AC092047.3 | mixed       |                                                                                                                                                                                               | - | GtoC | 0.1304 | 0.1481 | 7  | 4  | [14,28]     |
| chr3:42660398  | AC092047.3 | mixed       |                                                                                                                                                                                               | - | CtoG | 0.1    | 0.2857 | 14 | 13 | [10,28]     |
| chr3:42662477  | AC092047.3 | mixed       |                                                                                                                                                                                               | - | AtoG | 0.1053 | 0.3333 | 10 | 5  | [13,38]     |
| chr3:42662881  | AC092047.3 | mixed       |                                                                                                                                                                                               | - | CtoT | 0.1176 | 0.1176 | 5  | 2  | [17,17]     |
| chr3:42664984  | AC092047.3 | mixed       |                                                                                                                                                                                               | - | AtoT | 0.2222 | 0.3333 | 2  | 2  | [10,12]     |
| chr16:88563788 | AC092143.3 | UTR3        |                                                                                                                                                                                               | - | TtoC | 0.1    | 0.1818 | 2  | 2  | [10,11]     |
| chr4:25358215  | AC092436.2 | mixed       |                                                                                                                                                                                               | - | TtoC | 0.1364 | 0.2    | 2  | 2  | [15,22]     |
| chr4:25458292  | AC092436.2 | mixed       |                                                                                                                                                                                               | - | GtoA | 0.1    | 0.1    | 2  | 2  | [10,10]     |
| chr7:99870895  | AC092849.1 | mixed       |                                                                                                                                                                                               | + | TtoC | 0.1    | 0.1364 | 3  | 2  | [10,23]     |
| chr7:99870896  | AC092849.1 | mixed       |                                                                                                                                                                                               | + | AtoC | 0.1    | 0.1    | 4  | 2  | [10,11]     |
| chr19:44866563 | AC093063.1 | mixed       |                                                                                                                                                                                               | + | CtoG | 0.1154 | 0.1818 | 4  | 2  | [11,26]     |
| chr19:44866566 | AC093063.1 | mixed       |                                                                                                                                                                                               | + | AtoC | 0.1    | 0.125  | 4  | 3  | [10,25]     |
| chr19:44866610 | AC093063.1 | mixed       |                                                                                                                                                                                               | + | GtoA | 0.1    | 0.3077 | 10 | 7  | [11,26]     |
| chr4:6728095   | AC093323.1 | mixed       |                                                                                                                                                                                               | + | CtoA | 0.1    | 0.1    | 2  | 2  | [10,10]     |
| chr2:87905683  | AC093616.2 | mixed       |                                                                                                                                                                                               | - | GtoA | 1      | 1      | 2  | 2  | [13,19]     |
| chr2:87905718  | AC093616.2 | mixed       |                                                                                                                                                                                               | - | CtoT | 0.9    | 0.9375 | 3  | 3  | [11,16]     |
| chr2:87905719  | AC093616.2 | mixed       |                                                                                                                                                                                               | - | AtoG | 0.9907 | 1      | 15 | 15 | [125,756]   |
| chr2:87905737  | AC093616.2 | mixed       |                                                                                                                                                                                               | - | CtoT | 0.9984 | 1      | 11 | 11 | [1350,6860] |
| chr2:87905784  | AC093616.2 | mixed       |                                                                                                                                                                                               | - | AtoG | 0.9957 | 1      | 6  | 6  | [71,482]    |
| chr4:142367449 | AC096733.1 | mixed       |                                                                                                                                                                                               | - | AtoG | 0.1    | 0.1053 | 4  | 2  | [10,19]     |
| chr3:45697205  | AC098476.2 | mixed       |                                                                                                                                                                                               | - | TtoC | 0.1    | 0.1765 | 11 | 6  | [20,80]     |
| chr2:217055919 | AC098820.1 | mixed       |                                                                                                                                                                                               | - | AtoG | 0.1053 | 0.1818 | 2  | 2  | [11,19]     |
| chr16:80287688 | AC099524.1 | mixed       |                                                                                                                                                                                               | + | TtoC | 0.1    | 0.1053 | 2  | 2  | [10,19]     |
| chr16:80300943 | AC099524.1 | mixed       |                                                                                                                                                                                               | + | GtoA | 0.1    | 0.1    | 5  | 2  | [10,20]     |
| chr4:185508424 | AC103540.1 | mixed       |                                                                                                                                                                                               | - | AtoC | 0.1    | 0.1538 | 2  | 2  | [20,26]     |
| chr18:17463188 | AC106037.2 | UTR3        |                                                                                                                                                                                               | + | TtoC | 0.1    | 0.1111 | 7  | 4  | [10,47]     |
| chr18:17463193 | AC106037.2 | UTR3        |                                                                                                                                                                                               | + | CtoA | 0.1    | 0.3077 | 10 | 7  | [10,21]     |

|                 |            |             |                                                                                                                                                                                               |   |      |        |        |    |    |          |
|-----------------|------------|-------------|-----------------------------------------------------------------------------------------------------------------------------------------------------------------------------------------------|---|------|--------|--------|----|----|----------|
| chr18:17463195  | AC106037.2 | UTR3        |                                                                                                                                                                                               | + | GtoA | 0.1429 | 0.1667 | 4  | 2  | [12,14]  |
| chr15:75258551  | AC107883.1 | coding_exon | ENST00000312493:WtoR;                                                                                                                                                                         | - | TtoC | 0.1    | 0.1    | 2  | 2  | [10,10]  |
| chr4:7709957    | AC110615.2 | coding_exon |                                                                                                                                                                                               | + | TtoC | 0.1333 | 0.25   | 6  | 2  | [12,16]  |
| chr4:77097535   | AC110615.2 | coding_exon |                                                                                                                                                                                               | + | CtoT | 0.1    | 0.1667 | 7  | 4  | [10,23]  |
| chr4:76190508   | AC110760.2 | UTR3        |                                                                                                                                                                                               | + | TtoA | 0.1    | 0.1875 | 3  | 3  | [10,16]  |
| chr5:162804038  | AC112205.1 | mixed       |                                                                                                                                                                                               | - | GtoA | 0.1    | 0.1111 | 3  | 2  | [20,27]  |
| chr5:162804481  | AC112205.1 | mixed       |                                                                                                                                                                                               | - | AtoT | 0.1    | 0.125  | 2  | 2  | [10,33]  |
| chr3:162629704  | AC112491.2 | mixed       |                                                                                                                                                                                               | + | TtoG | 1      | 1      | 3  | 3  | [10,16]  |
| chr3:162629705  | AC112491.2 | mixed       |                                                                                                                                                                                               | + | GtoA | 0.8571 | 1      | 2  | 2  | [13,14]  |
| chr5:1129254    | AC116351.1 | mixed       |                                                                                                                                                                                               | + | AtoT | 0.1    | 0.2    | 3  | 2  | [10,10]  |
| chr3:187677294  | AC117414.2 | mixed       |                                                                                                                                                                                               | + | AtoC | 0.1053 | 0.3    | 2  | 2  | [10,19]  |
| chr3:187677343  | AC117414.2 | mixed       |                                                                                                                                                                                               | + | AtoG | 0.1    | 0.1    | 2  | 2  | [10,10]  |
| chr3:187677501  | AC117414.2 | mixed       |                                                                                                                                                                                               | + | TtoC | 0.1    | 0.1    | 4  | 2  | [10,10]  |
| chr1:203949187  | AC119673.2 | mixed       |                                                                                                                                                                                               | + | AtoG | 0.1212 | 0.5625 | 17 | 15 | [15,58]  |
| chr1:203949201  | AC119673.2 | mixed       |                                                                                                                                                                                               | + | AtoG | 0.1333 | 0.5    | 14 | 11 | [12,53]  |
| chr1:203949319  | AC119673.2 | mixed       |                                                                                                                                                                                               | + | GtoA | 0.1    | 0.4211 | 18 | 10 | [26,96]  |
| chr1:203949343  | AC119673.2 | mixed       |                                                                                                                                                                                               | + | AtoG | 0.1    | 0.4211 | 14 | 10 | [12,61]  |
| chr1:203949414  | AC119673.2 | mixed       |                                                                                                                                                                                               | + | AtoT | 0.1176 | 0.3636 | 5  | 4  | [11,23]  |
| chr1:203949445  | AC119673.2 | mixed       |                                                                                                                                                                                               | + | AtoG | 0.12   | 0.2593 | 13 | 9  | [13,63]  |
| chr1:203949497  | AC119673.2 | mixed       |                                                                                                                                                                                               | + | CtoT | 0.1154 | 0.283  | 15 | 9  | [26,100] |
| chr1:203949498  | AC119673.2 | mixed       |                                                                                                                                                                                               | + | AtoG | 0.1154 | 0.2642 | 15 | 8  | [26,102] |
| chr17:76003629  | AC120024.1 | mixed       |                                                                                                                                                                                               | + | CtoA | 0.1    | 0.2    | 2  | 2  | [10,10]  |
| chr8:71649147   | AC120194.1 | coding_exon |                                                                                                                                                                                               | + | TtoC | 0.1429 | 0.1429 | 2  | 2  | [14,14]  |
| chr8:71648714   | AC120194.1 | UTR5        |                                                                                                                                                                                               | + | AtoG | 0.1    | 0.1667 | 2  | 2  | [10,12]  |
| chr17:77580261  | AC129510.2 | mixed       |                                                                                                                                                                                               | + | GtoC | 0.1333 | 0.1429 | 5  | 2  | [14,15]  |
| chr17:77603536  | AC129510.2 | mixed       |                                                                                                                                                                                               | + | AtoG | 0.1333 | 0.1818 | 4  | 2  | [11,15]  |
| chr17:77608628  | AC129510.2 | mixed       |                                                                                                                                                                                               | + | TtoC | 0.125  | 0.2    | 10 | 4  | [11,26]  |
| chr17:77629508  | AC129510.2 | mixed       |                                                                                                                                                                                               | + | AtoG | 0.1333 | 0.1538 | 3  | 2  | [13,15]  |
| chr5:138751156  | AC135457.2 | coding_exon | ENST00000400233:TtoA;                                                                                                                                                                         | - | AtoG | 0.1818 | 0.4545 | 6  | 6  | [11,13]  |
| chr3:48997813   | AC137630.3 | mixed       |                                                                                                                                                                                               | - | TtoC | 0.1    | 0.125  | 6  | 3  | [10,16]  |
| chr5:176879452  | AC145098.2 | UTR3        |                                                                                                                                                                                               | - | CtoT | 0.1    | 0.1    | 2  | 2  | [10,10]  |
| chr5:68696702   | AC145132.3 | coding_exon |                                                                                                                                                                                               | - | TtoC | 0.1053 | 0.1176 | 2  | 2  | [17,57]  |
| chr3:38139231   | ACAA1      | UTR3        |                                                                                                                                                                                               | - | AtoG | 0.1154 | 0.1538 | 4  | 2  | [13,26]  |
| chr17:32556803  | ACACA      | coding_exon |                                                                                                                                                                                               | - | CtoT | 0.1071 | 0.1667 | 5  | 3  | [14,28]  |
| chr12:110676068 | ACAD10     | coding_exon | ENST00000313698:RtoI;ENST00000455480:RtoI;                                                                                                                                                    | + | GtoT | 0.1    | 0.1    | 2  | 2  | [10,10]  |
| chr11:133640027 | ACAD8      | coding_exon | ENST00000281182:MtoK;ENST00000374752:MtoK;                                                                                                                                                    | + | TtoA | 0.1    | 0.1    | 2  | 2  | [10,10]  |
| chr11:133631698 | ACAD8      | coding_exon |                                                                                                                                                                                               | + | CtoA | 0.1    | 0.1176 | 2  | 2  | [10,17]  |
| chr1:76001009   | ACADM      | coding_exon |                                                                                                                                                                                               | + | TtoA | 0.1    | 0.1053 | 4  | 2  | [11,19]  |
| chr10:124800620 | ACADSB     | coding_exon |                                                                                                                                                                                               | + | TtoC | 0.1    | 0.1    | 2  | 2  | [10,10]  |
| chr17:7069280   | ACADVL     | UTR3        |                                                                                                                                                                                               | + | TtoC | 0.1129 | 0.1324 | 11 | 4  | [43,207] |
| chr17:7069305   | ACADVL     | UTR3        |                                                                                                                                                                                               | + | AtoG | 0.1333 | 0.5    | 4  | 2  | [10,15]  |
| chr3:196477495  | ACAP2      | UTR3        |                                                                                                                                                                                               | - | TtoA | 0.1    | 0.1538 | 4  | 2  | [10,14]  |
| chr3:19647584   | ACAP2      | UTR3        |                                                                                                                                                                                               | - | GtoA | 0.1    | 0.1538 | 5  | 2  | [10,13]  |
| chr1:1227231    | ACAP3      | coding_exon | ENST00000353662:Etog;ENST00000354700:Etog;                                                                                                                                                    | - | AtoG | 0.1429 | 0.2    | 3  | 2  | [10,14]  |
| chr1:1217738    | ACAP3      | UTR3        |                                                                                                                                                                                               | - | TtoG | 0.2727 | 0.7273 | 5  | 3  | [11,15]  |
| chr1:224419150  | ACBD3      | coding_exon | ENST00000366812:StoP;                                                                                                                                                                         | - | TtoC | 0.1    | 0.1429 | 4  | 2  | [14,20]  |
| chr16:66249447  | ACD        | coding_exon |                                                                                                                                                                                               | - | GtoA | 0.1333 | 0.1667 | 3  | 2  | [15,18]  |
| chr14:22606709  | ACIN1      | coding_exon |                                                                                                                                                                                               | - | CtoG | 0.1    | 0.1818 | 2  | 2  | [10,12]  |
| chr14:22606941  | ACIN1      | coding_exon |                                                                                                                                                                                               | - | CtoG | 0.1    | 0.1333 | 2  | 2  | [10,15]  |
| chr14:22607009  | ACIN1      | coding_exon |                                                                                                                                                                                               | - | GtoT | 0.1    | 0.2    | 3  | 2  | [10,10]  |
| chr14:22618623  | ACIN1      | coding_exon |                                                                                                                                                                                               | - | TtoA | 0.125  | 0.56   | 5  | 4  | [11,32]  |
| chr17:37323678  | ACLY       | mixed       |                                                                                                                                                                                               | - | CtoG | 0.1379 | 0.4    | 8  | 8  | [21,45]  |
| chr17:37328659  | ACLY       | mixed       |                                                                                                                                                                                               | - | GtoC | 0.1159 | 0.1474 | 4  | 3  | [43,95]  |
| chr17:37328747  | ACLY       | mixed       |                                                                                                                                                                                               | - | CtoT | 0.1429 | 0.1667 | 3  | 2  | [12,14]  |
| chr17:37277166  | ACLY       | UTR3        |                                                                                                                                                                                               | - | AtoG | 0.1    | 0.1818 | 4  | 3  | [10,12]  |
| chr9:32415977   | ACO1       | coding_exon | ENST00000309951:StoP;ENST00000379923:StoP;                                                                                                                                                    | + | TtoC | 0.1    | 0.1    | 2  | 2  | [10,10]  |
| chr4:8458606    | ACOX3      | coding_exon | ENST00000356406:LtoP;ENST00000413009:LtoP;                                                                                                                                                    | - | TtoC | 0.1    | 0.1667 | 3  | 2  | [10,12]  |
| chr4:8458615    | ACOX3      | coding_exon | ENST00000356406:GtoE;ENST00000413009:GtoE;                                                                                                                                                    | - | GtoA | 0.1    | 0.1111 | 2  | 2  | [10,18]  |
| chr4:8419327    | ACOX3      | UTR3        |                                                                                                                                                                                               | - | TtoG | 0.1    | 0.1    | 4  | 2  | [10,10]  |
| chr16:87739215  | ACSF3      | coding_exon | ENST00000317447:RtoQ;ENST00000393145:Etog;ENST00000406948:RtoQ;                                                                                                                               | + | GtoA | 0.1538 | 0.3158 | 2  | 2  | [13,19]  |
| chr2:223501852  | ACSL3      | coding_exon |                                                                                                                                                                                               | + | AtoG | 0.1053 | 0.125  | 3  | 2  | [17,20]  |
| chr10:114154526 | ACSL5      | coding_exon | ENST00000354273:VtoA;ENST00000354655:VtoA;ENST00000356116:VtoA;ENST00000354273:TtoR;ENST00000354655:TtoR;ENST00000356116:TtoR;ENST00000354273:VtoG;ENST00000354655:VtoG;ENST00000356116:VtoG; | + | TtoC | 0.125  | 0.125  | 4  | 2  | [16,24]  |
| chr10:114166655 | ACSL5      | coding_exon | ENST00000354273:TtoR;ENST00000354655:TtoR;ENST00000356116:TtoR;ENST00000354273:VtoG;ENST00000354655:VtoG;ENST00000356116:VtoG;                                                                | + | CtoG | 0.1    | 0.1    | 5  | 2  | [10,30]  |
| chr10:114177155 | ACSL5      | UTR3        |                                                                                                                                                                                               | + | AtoG | 0.1    | 0.1333 | 2  | 2  | [10,15]  |
| chr16:20715219  | ACSM3      | coding_exon |                                                                                                                                                                                               | + | TtoC | 0.1    | 0.1    | 2  | 2  | [10,10]  |
| chr20:24952179  | ACSS1      | coding_exon | ENST00000323482:TtoP;ENST00000432802:TtoP;                                                                                                                                                    | - | AtoC | 0.1    | 0.1    | 3  | 2  | [10,10]  |
| chr3:18077190   | ACTL6A     | coding_exon |                                                                                                                                                                                               | + | AtoG | 0.1    | 0.1    | 3  | 2  | [10,10]  |
| chr3:180788554  | ACTL6A     | UTR3        |                                                                                                                                                                                               | + | TtoC | 0.1071 | 0.1163 | 4  | 2  | [28,43]  |
| chr3:180788813  | ACTL6A     | UTR3        |                                                                                                                                                                                               | + | AtoC | 0.1    | 0.1    | 2  | 2  | [10,10]  |
| chr19:43913012  | ACTN4      | UTR3        |                                                                                                                                                                                               | + | TtoA | 0.1    | 0.1818 | 5  | 3  | [10,11]  |
| chr10:104231754 | ACTR1A     | coding_exon | ENST00000369905:FtoL;ENST00000446605:FtoL;                                                                                                                                                    | - | TtoC | 0.1    | 0.1    | 3  | 2  | [10,10]  |
| chr2:65327269   | ACTR2      | coding_exon | ENST00000260641:Wto*;ENST00000377982:Wto*;                                                                                                                                                    | + | GtoA | 0.1    | 0.2143 | 2  | 2  | [10,14]  |
| chr2:65327306   | ACTR2      | coding_exon | ENST00000260641:TtoA;ENST00000377982:TtoA;                                                                                                                                                    | + | AtoG | 0.1    | 0.2    | 4  | 2  | [10,10]  |
| chr2:65327332   | ACTR2      | coding_exon |                                                                                                                                                                                               | + | AtoG | 0.1    | 0.1    | 3  | 2  | [10,10]  |
| chr2:65341935   | ACTR2      | coding_exon |                                                                                                                                                                                               | + | AtoG | 0.1081 | 0.1279 | 8  | 2  | [38,91]  |
| chr2:114432187  | ACTR3      | UTR3        |                                                                                                                                                                                               | + | AtoG | 0.1154 | 0.1389 | 6  | 3  | [25,37]  |
| chr2:114432289  | ACTR3      | UTR3        |                                                                                                                                                                                               | + | AtoG | 0.1364 | 0.1818 | 4  | 3  | [12,22]  |
| chr2:114432291  | ACTR3      | UTR3        |                                                                                                                                                                                               | + | AtoG | 0.1    | 0.1364 | 6  | 3  | [16,22]  |
| chr3:53883381   | ACTR8      | coding_exon | ENST00000335754:LtoQ;ENST00000482349:LtoQ;                                                                                                                                                    | - | TtoA | 0.1111 | 0.1667 | 4  | 2  | [18,19]  |
| chr3:53879133   | ACTR8      | coding_exon |                                                                                                                                                                                               | - | AtoG | 0.1176 | 0.1538 | 2  | 2  | [13,17]  |
| chr14:74599948  | ACYP1      | coding_exon | ENST00000238618:VtoA;ENST00000357971:VtoA;                                                                                                                                                    | - | TtoC | 0.1818 | 0.2105 | 6  | 2  | [11,21]  |
| chr19:40913114  | AD000671.1 | coding_exon | ENST00000222270:LtoP;ENST00000396924:LtoP;ENST00000420124:LtoP;                                                                                                                               | + | TtoC | 0.1429 | 0.1667 | 5  | 2  | [12,14]  |
| chr19:40903023  | AD000671.1 | coding_exon | ENST00000222270:KtoE;ENST00000341701:KtoE;ENST00000396924:KtoE;ENST00000420124:KtoE;                                                                                                          | + | AtoG | 0.1538 | 0.1818 | 4  | 2  | [12,13]  |
| chr19:40916339  | AD000671.1 | coding_exon | ENST00000222270:FtoV;ENST00000396924:FtoV;ENST00000420124:FtoV;                                                                                                                               | + | TtoG | 0.1    | 0.2143 | 3  | 3  | [10,14]  |
| chr20:42684981  | ADA        | coding_exon | ENST00000372874:VtoG;                                                                                                                                                                         | - | TtoG | 0.1333 | 0.1449 | 3  | 2  | [15,138] |
| chr15:56691422  | ADAM10     | coding_exon |                                                                                                                                                                                               | - | TtoC | 0.1167 | 0.1429 | 6  | 3  | [14,60]  |
| chr15:56676394  | ADAM10     | UTR3        |                                                                                                                                                                                               | - | AtoG | 0.1    | 0.2    | 6  | 3  | [10,16]  |
| chr2:9548681    | ADAM17     | coding_exon | ENST00000310823:StoR;                                                                                                                                                                         | - | TtoG | 0.1    | 0.1818 | 2  | 2  | [10,11]  |
| chr5:156923971  | ADAM19     | coding_exon | ENST00000257527:LtoP;ENST00000394020:LtoP;ENST00000430702:LtoP;ENST00000394020:VtoA;ENST00000394020:WtoA;                                                                                     | - | TtoC | 0.1    | 0.1053 | 4  | 2  | [10,19]  |
| chr2:207190895  | ADAM23     | UTR3        |                                                                                                                                                                                               | + | AtoG | 0.1    | 0.1111 | 3  | 2  | [10,18]  |
| chr8:39080569   | ADAM9      | UTR3        |                                                                                                                                                                                               | + | CtoA | 0.1    | 0.1    | 2  | 2  | [10,10]  |
| chr1:152828520  | ADAR       | coding_exon | ENST00000292205:Etog;ENST00000368471:Etog;ENST00000368474:Etog;ENST00000368471:VtoA;ENST00000368471:WtoA;                                                                                     | - | AtoG | 0.1    | 0.1667 | 2  | 2  | [10,12]  |
| chr1:152821193  | ADAR       | UTR3        |                                                                                                                                                                                               | - | TtoA | 0.1538 | 0.2308 | 5  | 4  | [11,15]  |
| chr1:152821194  | ADAR       | UTR3        |                                                                                                                                                                                               | - | AtoG | 0.1176 | 0.3    | 10 | 8  | [10,23]  |
| chr1:152821196  | ADAR       | UTR3        |                                                                                                                                                                                               | - | TtoC | 0.1124 | 0.3571 | 11 | 8  | [11,92]  |
| chr1:152821482  | ADAR       | UTR3        |                                                                                                                                                                                               | - | TtoC | 0.1    | 0.1184 | 8  | 2  | [77,123] |

|                 |         |             |                                                                                      |   |      |        |        |    |    |          |
|-----------------|---------|-------------|--------------------------------------------------------------------------------------|---|------|--------|--------|----|----|----------|
| chr1:152821575  | ADAR    | UTR3        |                                                                                      | - | TtoC | 0.1532 | 0.2113 | 8  | 7  | [50,124] |
| chr2:145468859  | ADARB1  | mixed       |                                                                                      | + | Atog | 0.1136 | 0.375  | 4  | 4  | [13,44]  |
| chr7:140025491  | ADCK2   | coding_exon | ENST00000072869:VtoA;ENST00000476491:VtoA;                                           | + | TtoC | 0.1    | 0.2143 | 4  | 2  | [10,14]  |
| chr8:145586753  | ADCK5   | coding_exon | ENST00000308860:EtoG;                                                                | + | Atog | 0.1    | 0.1    | 2  | 2  | [10,10]  |
| chr7:45726932   | ADCY1   | UTR3        |                                                                                      | + | TtoC | 0.1111 | 0.125  | 3  | 2  | [16,18]  |
| chr2:24896573   | ADCY3   | coding_exon |                                                                                      | - | TtoC | 0.1    | 0.2727 | 3  | 2  | [11,20]  |
| chr16:48908477  | ADCY7   | UTR3        |                                                                                      | + | TtoG | 0.1    | 0.1176 | 4  | 2  | [10,17]  |
| chr4:2901430    | ADD1    | UTR3        |                                                                                      | + | Atog | 0.1    | 0.1212 | 3  | 2  | [10,36]  |
| chr4:2901586    | ADD1    | UTR3        |                                                                                      | + | Atog | 0.1    | 0.4    | 5  | 2  | [10,10]  |
| chr10:111872030 | ADD3    | coding_exon | ENST00000277900:LtoP;ENST00000356080:LtoP;ENST00000360162:LtoP;                      | + | TtoC | 0.1    | 0.1111 | 3  | 2  | [10,18]  |
| chr10:111882057 | ADD3    | coding_exon |                                                                                      | + | TtoA | 0.1    | 0.1    | 2  | 2  | [10,10]  |
| chr9:19111163   | ADFP    | coding_exon | ENST00000276914:itoV;ENST00000411567:itoV;                                           | - | Atog | 0.1    | 0.3636 | 3  | 2  | [10,11]  |
| chr9:19105859   | ADFP    | UTR3        |                                                                                      | - | CtoA | 0.1    | 0.1053 | 2  | 2  | [19,20]  |
| chr12:1765794   | ADIPOR2 | UTR3        |                                                                                      | + | TtoA | 0.1    | 0.2    | 5  | 2  | [10,11]  |
| chr12:1767644   | ADIPOR2 | UTR3        |                                                                                      | + | Atoc | 0.1333 | 0.16   | 2  | 2  | [15,25]  |
| chr20:48942124  | ADNP    | coding_exon | ENST00000349014:LtoQ;ENST00000371602:LtoQ;ENST00000396029:LtoQ;ENST00000396029:LtoQ; | - | TtoA | 0.1034 | 0.125  | 4  | 2  | [16,30]  |
| chr20:48940971  | ADNP    | UTR3        |                                                                                      | - | TtoC | 0.1    | 0.1111 | 2  | 2  | [10,18]  |
| chr20:48941177  | ADNP    | UTR3        |                                                                                      | - | TtoG | 0.1    | 0.1429 | 3  | 3  | [14,30]  |
| chr18:75995931  | ADNP2   | coding_exon |                                                                                      | + | TtoG | 0.1    | 0.1    | 2  | 2  | [10,10]  |
| chr18:75998586  | ADNP2   | UTR3        |                                                                                      | + | TtoC | 0.1    | 0.2    | 4  | 2  | [10,10]  |
| chr10:64237015  | ADO     | mixed       |                                                                                      | + | TtoA | 0.1    | 0.1053 | 3  | 2  | [10,19]  |
| chr15:70835026  | ADPGK   | coding_exon | ENST00000311669:itoT;ENST00000331065:itoT;ENST00000443764:itoT;ENST00000443764:itoT; | - | TtoC | 0.1    | 0.1333 | 3  | 2  | [15,20]  |
| chr15:70831744  | ADPGK   | coding_exon |                                                                                      | - | TtoC | 0.1176 | 0.1429 | 2  | 2  | [11,22]  |
| chr15:70835705  | ADPGK   | coding_exon |                                                                                      | - | CtoT | 0.1111 | 0.4762 | 11 | 10 | [23,57]  |
| chr3:120783813  | ADPRH   | coding_exon | ENST00000357003:QtoR;ENST00000465513:QtoR;ENST00000478399:QtoR;ENST00000478399:QtoR; | + | Atog | 0.1176 | 0.1304 | 4  | 2  | [18,23]  |
| chr3:120790478  | ADPRH   | UTR3        |                                                                                      | + | TtoC | 0.1    | 0.1176 | 6  | 2  | [10,17]  |
| chr1:36329956   | ADPRHL2 | coding_exon |                                                                                      | + | TtoG | 0.1    | 0.1    | 3  | 2  | [10,20]  |
| chr1:36331905   | ADPRHL2 | UTR3        |                                                                                      | + | TtoG | 0.1    | 0.1053 | 2  | 2  | [19,20]  |
| chr1:36332031   | ADPRHL2 | UTR3        |                                                                                      | + | TtoA | 0.1154 | 0.1351 | 8  | 3  | [26,49]  |
| chr11:66810602  | ADRBK1  | UTR3        |                                                                                      | + | GtoA | 0.1333 | 0.1667 | 2  | 2  | [13,15]  |
| chr22:39092511  | ADSL    | UTR3        |                                                                                      | + | TtoC | 0.125  | 0.2    | 11 | 3  | [10,19]  |
| chr22:39092517  | ADSL    | UTR3        |                                                                                      | + | Atog | 0.1    | 0.2    | 5  | 2  | [10,20]  |
| chr1:242654293  | ADSS    | coding_exon |                                                                                      | - | Atoc | 0.1    | 0.2    | 4  | 2  | [10,10]  |
| chr1:242639394  | ADSS    | UTR3        |                                                                                      | - | TtoC | 0.1538 | 0.2    | 8  | 2  | [11,13]  |
| chr15:86975892  | AEN     | UTR3        |                                                                                      | + | CtoA | 0.1    | 0.1429 | 3  | 2  | [10,14]  |
| chr15:86976515  | AEN     | UTR3        |                                                                                      | + | TtoC | 0.1    | 0.1    | 2  | 2  | [10,10]  |
| chr19:3004163   | AES     | UTR3        |                                                                                      | - | TtoA | 0.1389 | 0.2258 | 4  | 2  | [31,38]  |
| chr10:116049995 | AFAP1L2 | coding_exon |                                                                                      | - | CtoG | 0.4118 | 0.5217 | 2  | 2  | [23,34]  |
| chr4:88275887   | AFF1    | UTR3        |                                                                                      | + | Atog | 0.1    | 0.1    | 3  | 2  | [10,10]  |
| chr4:88278944   | AFF1    | UTR3        |                                                                                      | + | TtoG | 0.1    | 0.1    | 5  | 2  | [10,10]  |
| chr5:132239473  | AFF4    | UTR3        |                                                                                      | - | TtoG | 0.1    | 0.1    | 3  | 2  | [10,10]  |
| chr5:132239872  | AFF4    | UTR3        |                                                                                      | - | TtoC | 0.1    | 0.1    | 5  | 2  | [10,10]  |
| chr5:132240042  | AFF4    | UTR3        |                                                                                      | - | Atot | 0.1    | 0.1    | 2  | 2  | [10,10]  |
| chr5:132240104  | AFF4    | UTR3        |                                                                                      | - | TtoG | 0.1    | 0.1    | 3  | 2  | [10,10]  |
| chr16:88589724  | AFG3L1  | mixed       |                                                                                      | + | GtoA | 0.1    | 0.1    | 3  | 2  | [10,10]  |
| chr18:12361660  | AFG3L2  | coding_exon | ENST00000269143:Atot;                                                                | - | GtoA | 0.1    | 0.1053 | 2  | 2  | [19,20]  |
| chr4:178592608  | AGA     | mixed       |                                                                                      | - | CtoA | 0.1    | 0.1176 | 2  | 2  | [10,17]  |
| chr7:150472033  | AGAP3   | UTR3        |                                                                                      | + | TtoG | 0.1    | 0.1111 | 2  | 2  | [10,27]  |
| chr2:27135600   | AGBL5   | coding_exon | ENST00000323064:RtoQ;ENST00000359582:RtoQ;ENST00000360131:RtoQ;                      | + | GtoA | 0.1071 | 0.1667 | 3  | 2  | [12,28]  |
| chr2:27131526   | AGBL5   | coding_exon | ENST00000323064:LtoP;ENST00000359582:LtoP;ENST00000360131:LtoP;                      | + | TtoC | 0.1    | 0.1176 | 2  | 2  | [10,17]  |
| chr2:228128004  | AGFG1   | UTR3        |                                                                                      | + | Atot | 0.1    | 0.1875 | 4  | 3  | [10,19]  |
| chr7:99997858   | AGFG2   | mixed       |                                                                                      | + | Atoc | 0.1    | 0.1    | 3  | 2  | [10,20]  |
| chr7:100001448  | AGFG2   | UTR3        |                                                                                      | + | CtoT | 0.1    | 0.2308 | 4  | 3  | [10,13]  |
| chr5:76394753   | AGGF1   | coding_exon | ENST00000312916:FtoI;                                                                | + | TtoA | 0.1    | 0.1    | 2  | 2  | [10,10]  |
| chr1:100119813  | AGL     | coding_exon |                                                                                      | + | Atog | 0.1    | 0.1429 | 2  | 2  | [10,14]  |
| chr6:32244190   | AGPAT1  | UTR3        |                                                                                      | - | TtoG | 0.1053 | 0.1429 | 6  | 2  | [19,21]  |
| chr9:138691697  | AGPAT2  | coding_exon | ENST00000371694:MtoI;ENST00000371696:MtoI;                                           | - | GtoC | 0.1333 | 0.1818 | 3  | 2  | [11,15]  |
| chr21:44228288  | AGPAT3  | mixed       |                                                                                      | + | GtoA | 0.1    | 0.1053 | 6  | 3  | [19,30]  |
| chr21:44228979  | AGPAT3  | mixed       |                                                                                      | + | TtoA | 0.1    | 0.1667 | 3  | 2  | [10,12]  |
| chr21:44230482  | AGPAT3  | UTR3        |                                                                                      | + | TtoG | 0.1    | 0.1    | 2  | 2  | [10,20]  |
| chr8:6602599    | AGPAT5  | UTR3        |                                                                                      | + | TtoC | 0.1081 | 0.1364 | 8  | 3  | [22,38]  |
| chr8:41598580   | AGPAT6  | UTR3        |                                                                                      | + | TtoG | 0.2222 | 0.3333 | 2  | 2  | [10,13]  |
| chr2:17811139   | AGPS    | coding_exon | ENST00000264167:NtoK;ENST00000409888:NtoK;                                           | + | TtoA | 0.1    | 0.125  | 3  | 2  | [10,16]  |
| chr2:178111717  | AGPS    | UTR3        |                                                                                      | + | TtoA | 0.1    | 0.2    | 3  | 2  | [10,10]  |
| chr2:178113838  | AGPS    | UTR3        |                                                                                      | + | TtoG | 0.1    | 0.1    | 3  | 2  | [10,10]  |
| chr1:972134     | AGRN    | mixed       |                                                                                      | + | TtoC | 0.1    | 0.1    | 2  | 2  | [10,20]  |
| chr9:87383670   | AGTPBP1 | mixed       |                                                                                      | - | TtoC | 0.1    | 0.1667 | 3  | 2  | [10,12]  |
| chr1:11732990   | AGTRAP  | UTR3        |                                                                                      | + | GtoT | 0.1    | 0.1667 | 3  | 2  | [10,12]  |
| chr5:177589635  | AGXT2L2 | coding_exon | ENST00000308158:YtoD;                                                                | - | TtoG | 0.1    | 0.1    | 2  | 2  | [10,10]  |
| chr5:177570614  | AGXT2L2 | UTR3        |                                                                                      | - | TtoC | 0.1    | 0.12   | 2  | 2  | [20,26]  |
| chr5:177570769  | AGXT2L2 | UTR3        |                                                                                      | - | TtoC | 0.1538 | 0.2    | 7  | 2  | [10,42]  |
| chr1:110363250  | AHCYL1  | coding_exon | ENST00000359172:TtoP;ENST00000369799:TtoP;                                           | + | Atoc | 0.1111 | 0.1667 | 6  | 5  | [17,37]  |
| chr1:110366071  | AHCYL1  | UTR3        |                                                                                      | + | CtoA | 0.12   | 0.1333 | 5  | 3  | [15,25]  |
| chr1:110367851  | AHCYL1  | UTR3        |                                                                                      | + | Atog | 0.125  | 0.2    | 5  | 2  | [10,16]  |
| chr11:62042741  | AHNAK   | coding_exon | ENST00000244934:GtoR;ENST00000378024:GtoR;                                           | - | GtoC | 0.4    | 0.5217 | 2  | 2  | [10,23]  |
| chr7:17346365   | AHR     | coding_exon |                                                                                      | + | Atog | 0.1333 | 0.1429 | 5  | 3  | [14,21]  |
| chr7:17350458   | AHR     | UTR3        |                                                                                      | + | TtoC | 0.1    | 0.2222 | 8  | 2  | [10,10]  |
| chr2:61267089   | AHSA2   | coding_exon | ENST00000357022:TtoR;ENST00000389584:TtoR;ENST00000394457:TtoR;ENST00000394457:TtoR; | + | CtoG | 0.1    | 0.2222 | 7  | 3  | [10,18]  |
| chr2:61267085   | AHSA2   | coding_exon | ENST00000357022:LtoV;ENST00000389584:LtoV;ENST00000394457:LtoV;ENST00000394457:LtoV; | + | TtoG | 0.1    | 0.4118 | 11 | 8  | [11,38]  |
| chr2:61266254   | AHSA2   | coding_exon | ENST00000357022:KtoN;ENST00000389584:KtoN;ENST00000394457:KtoN;ENST00000394457:KtoN; | + | GtoT | 0.1    | 0.2    | 9  | 7  | [15,20]  |
| chr2:61266255   | AHSA2   | coding_exon | ENST00000357022:EtoQ;ENST00000389584:EtoQ;ENST00000394457:EtoQ;ENST00000394457:EtoQ; | + | GtoC | 0.1    | 0.2105 | 11 | 6  | [16,21]  |
| chr2:61258727   | AHSA2   | mixed       |                                                                                      | + | TtoG | 0.1    | 0.1    | 3  | 2  | [10,10]  |
| chr12:8646440   | AICDA   | UTR3        |                                                                                      | - | Atog | 0.1    | 0.1667 | 7  | 6  | [10,29]  |
| chr6:143703017  | AIG1    | UTR3        |                                                                                      | + | Atog | 0.1    | 0.1333 | 5  | 2  | [10,15]  |
| chr6:107116016  | AIM1    | coding_exon | ENST00000285105:VtoA;ENST00000369066:VtoA;                                           | + | TtoC | 0.14   | 0.1429 | 2  | 2  | [21,51]  |
| chr6:107115461  | AIM1    | coding_exon | ENST00000285105:CtoW;ENST00000369066:CtoW;                                           | + | TtoG | 0.125  | 0.1905 | 4  | 2  | [16,21]  |
| chr6:107113062  | AIM1    | coding_exon |                                                                                      | + | TtoA | 0.125  | 0.15   | 2  | 2  | [16,20]  |
| chr6:107123530  | AIM1    | UTR3        |                                                                                      | + | Atot | 0.125  | 0.1951 | 2  | 2  | [16,41]  |
| chr6:107123531  | AIM1    | UTR3        |                                                                                      | + | CtoT | 0.1111 | 0.15   | 2  | 2  | [18,40]  |
| chr6:107124403  | AIM1    | UTR3        |                                                                                      | + | Atot | 0.1026 | 0.1111 | 2  | 2  | [36,39]  |
| chr1:157302593  | AIM2    | coding_exon | ENST00000368130:TtoA;                                                                | - | Atog | 0.1    | 0.1    | 2  | 2  | [10,10]  |
| chr1:157313073  | AIM2    | UTR5        |                                                                                      | - | TtoC | 0.1    | 0.1    | 3  | 2  | [10,10]  |
| chr1:33251282   | AK2     | mixed       |                                                                                      | - | TtoA | 0.1538 | 0.1579 | 10 | 2  | [13,20]  |
| chr1:33251288   | AK2     | mixed       |                                                                                      | - | TtoC | 0.1    | 0.1333 | 4  | 2  | [15,20]  |
| chr17:52553339  | AKAP1   | UTR3        |                                                                                      | + | TtoC | 0.1    | 0.1538 | 2  | 2  | [10,13]  |
| chr17:19801956  | AKAP10  | coding_exon |                                                                                      | - | TtoA | 0.1818 | 0.2    | 2  | 2  | [10,11]  |

|                 |             |             |                                                                                                                                                                                               |   |      |        |        |    |    |           |
|-----------------|-------------|-------------|-----------------------------------------------------------------------------------------------------------------------------------------------------------------------------------------------|---|------|--------|--------|----|----|-----------|
| chr17:19801962  | AKAP10      | coding_exon |                                                                                                                                                                                               | - | TtoC | 0.1    | 0.1667 | 2  | 2  | [10,12]   |
| chr17:19749580  | AKAP10      | UTR3        |                                                                                                                                                                                               | - | AtoG | 0.1333 | 0.1429 | 3  | 2  | [14,15]   |
| chr13:41791279  | AKAP11      | coding_exon | ENST00000025301:VtoE;                                                                                                                                                                         | + | TtoA | 0.1    | 0.1    | 2  | 2  | [10,11]   |
| chr13:41773350  | AKAP11      | coding_exon | ENST00000025301:TtoK;                                                                                                                                                                         | + | CtoA | 0.1    | 0.1    | 3  | 2  | [10,10]   |
| chr13:41780624  | AKAP11      | coding_exon | ENST00000025301:StoP;                                                                                                                                                                         | + | TtoC | 0.1    | 0.1111 | 4  | 2  | [10,18]   |
| chr13:41789733  | AKAP11      | coding_exon | ENST00000025301:QtoR;                                                                                                                                                                         | + | AtoG | 0.1053 | 0.1389 | 5  | 2  | [19,37]   |
| chr13:41785184  | AKAP11      | coding_exon | ENST00000025301:NtoD;                                                                                                                                                                         | + | AtoG | 0.4286 | 0.6364 | 3  | 3  | [11,15]   |
| chr15:83929949  | AKAP13      | coding_exon | ENST00000361243:VtoG;ENST00000394518:VtoG;                                                                                                                                                    | + | TtoG | 0.1    | 0.1818 | 2  | 2  | [10,11]   |
| chr15:84061587  | AKAP13      | coding_exon | ENST00000361243:LtoQ;ENST00000394510:LtoQ;ENST00000394518:LtoQ;                                                                                                                               | + | TtoA | 0.1    | 0.1667 | 3  | 2  | [10,12]   |
| chr15:84008801  | AKAP13      | coding_exon | ENST00000361243:FtoL;ENST00000394518:FtoL;                                                                                                                                                    | + | CtoG | 0.1    | 0.2143 | 6  | 2  | [10,14]   |
| chr15:84008799  | AKAP13      | coding_exon | ENST00000361243:FtoI;ENST00000394518:FtoI;                                                                                                                                                    | + | TtoA | 0.1    | 0.2667 | 9  | 3  | [10,23]   |
| chr15:84029108  | AKAP13      | coding_exon |                                                                                                                                                                                               | + | AtoG | 0.1    | 0.1818 | 8  | 3  | [10,11]   |
| chr15:84091269  | AKAP13      | UTR3        |                                                                                                                                                                                               | + | TtoC | 0.1    | 0.1667 | 7  | 3  | [10,12]   |
| chr15:84091617  | AKAP13      | UTR3        |                                                                                                                                                                                               | + | AtoT | 0.1    | 0.1765 | 2  | 2  | [10,18]   |
| chr9:111971083  | AKAP2       | UTR3        |                                                                                                                                                                                               | + | TtoC | 0.1    | 0.2    | 13 | 7  | [18,78]   |
| chr9:111971512  | AKAP2       | UTR3        |                                                                                                                                                                                               | + | AtoG | 0.1091 | 0.2778 | 7  | 3  | [19,57]   |
| chr7:91508102   | AKAP9       | coding_exon | ENST00000356239:StoG;                                                                                                                                                                         | + | AtoG | 0.1    | 0.1333 | 2  | 2  | [10,15]   |
| chr9:116145871  | AKNA        | coding_exon | ENST00000223791:VtoA;ENST00000307564:VtoA;ENST00000374075:VtoA;ENST00000223791:HtoR;ENST00000307564:HtoR;ENST00000374075:HtoR;ENST00000223791:VtoG;ENST00000307564:VtoG;ENST00000374075:VtoG; | - | TtoC | 0.1429 | 0.1818 | 5  | 2  | [11,35]   |
| chr9:116153095  | AKNA        | coding_exon | ENST00000223791:HtoR;ENST00000307564:HtoR;ENST00000374075:HtoR;ENST00000223791:VtoG;ENST00000307564:VtoG;ENST00000374075:VtoG;                                                                | - | AtoG | 0.1034 | 0.125  | 3  | 2  | [17,31]   |
| chr9:116138289  | AKNA        | UTR3        |                                                                                                                                                                                               | - | AtoG | 0.1    | 0.1176 | 2  | 2  | [17,30]   |
| chr1:45808304   | AKR1A1      | UTR3        |                                                                                                                                                                                               | + | AtoG | 0.1    | 0.125  | 5  | 2  | [10,16]   |
| chr7:133786993  | AKR1B1      | coding_exon | ENST00000285930:YtoS;ENST00000458165:YtoS;                                                                                                                                                    | - | AtoC | 0.1    | 0.1053 | 2  | 2  | [20,96]   |
| chr1:19505140   | AKR7A2      | coding_exon | ENST00000235835:StoP;ENST00000424403:StoP;                                                                                                                                                    | - | TtoC | 0.1034 | 0.1875 | 2  | 2  | [16,29]   |
| chr1:19506136   | AKR7A2      | coding_exon | ENST00000235835:KtoN;ENST00000424403:KtoN;                                                                                                                                                    | - | AtoC | 0.1    | 0.1    | 3  | 2  | [10,20]   |
| chr1:19503359   | AKR7A2      | coding_exon | ENST00000235835:FtoV;ENST00000424403:FtoV;                                                                                                                                                    | - | TtoG | 0.1    | 0.1667 | 3  | 2  | [10,12]   |
| chr19:55073308  | AKT1S1      | UTR5        |                                                                                                                                                                                               | - | TtoA | 0.1064 | 0.1346 | 2  | 2  | [47,52]   |
| chr19:45430088  | AKT2        | UTR3        |                                                                                                                                                                                               | - | AtoG | 0.1    | 0.1053 | 7  | 3  | [10,20]   |
| chr1:33247069   | AL020995.2  | mixed       |                                                                                                                                                                                               | + | CtoT | 0.125  | 0.3077 | 4  | 3  | [13,18]   |
| chr1:33247070   | AL020995.2  | mixed       |                                                                                                                                                                                               | + | AtoT | 0.3    | 0.6    | 5  | 5  | [11,26]   |
| chr1:33247074   | AL020995.2  | mixed       |                                                                                                                                                                                               | + | AtoG | 0.1053 | 0.28   | 8  | 3  | [19,25]   |
| chr1:33248138   | AL020995.2  | mixed       |                                                                                                                                                                                               | + | GtoC | 0.1034 | 0.1111 | 9  | 2  | [27,29]   |
| chr1:33248139   | AL020995.2  | mixed       |                                                                                                                                                                                               | + | GtoT | 0.1026 | 0.125  | 10 | 4  | [26,39]   |
| chr1:33248466   | AL020995.2  | mixed       |                                                                                                                                                                                               | + | TtoC | 1      | 1      | 2  | 2  | [142,143] |
| chr1:23960583   | AL031295.1  | mixed       |                                                                                                                                                                                               | - | GtoT | 0.1    | 0.1667 | 2  | 2  | [10,12]   |
| chr1:23282721   | AL031428.1  | mixed       |                                                                                                                                                                                               | - | CtoT | 0.2    | 0.2667 | 2  | 2  | [10,15]   |
| chr1:23284878   | AL031428.1  | mixed       |                                                                                                                                                                                               | - | TtoG | 0.1    | 0.1    | 3  | 2  | [10,11]   |
| chr20:256273    | AL034548.1  | mixed       |                                                                                                                                                                                               | - | AtoT | 0.1    | 0.1111 | 4  | 2  | [10,18]   |
| chr20:256428    | AL034548.1  | mixed       |                                                                                                                                                                                               | - | TtoC | 0.1    | 0.1    | 3  | 2  | [10,10]   |
| chr20:39163316  | AL035652.3  | mixed       |                                                                                                                                                                                               | - | TtoC | 0.1136 | 0.125  | 2  | 2  | [16,45]   |
| chr22:39902358  | AL035658.2  | mixed       |                                                                                                                                                                                               | - | GtoA | 0.1    | 0.1    | 2  | 2  | [10,10]   |
| chr14:53963696  | AL049778.1  | mixed       |                                                                                                                                                                                               | - | TtoG | 0.1    | 0.1176 | 3  | 2  | [10,17]   |
| chr6:137560512  | AL050337.1  | coding_exon | ENST00000412130:QtoH;                                                                                                                                                                         | + | AtoC | 0.1    | 0.125  | 6  | 2  | [10,16]   |
| chr11:32075413  | AL078612.4  | mixed       |                                                                                                                                                                                               | - | TtoG | 0.1    | 0.2667 | 3  | 3  | [15,40]   |
| chr11:32076646  | AL078612.4  | mixed       |                                                                                                                                                                                               | - | AtoG | 0.1429 | 0.3333 | 5  | 3  | [18,37]   |
| chr11:32081587  | AL078612.4  | mixed       |                                                                                                                                                                                               | - | TtoC | 0.125  | 0.2941 | 3  | 2  | [17,40]   |
| chr14:102465909 | AL117209.1  | UTR3        |                                                                                                                                                                                               | - | GtoA | 0.1    | 0.1176 | 2  | 2  | [10,17]   |
| chr20:32764495  | AL118520.1  | mixed       |                                                                                                                                                                                               | - | AtoG | 0.1    | 0.1    | 3  | 2  | [10,10]   |
| chr20:33542040  | AL121586.5  | mixed       |                                                                                                                                                                                               | - | CtoG | 0.1905 | 0.2    | 2  | 2  | [10,21]   |
| chr20:33542041  | AL121586.5  | mixed       |                                                                                                                                                                                               | - | GtoT | 0.1818 | 0.2    | 2  | 2  | [11,20]   |
| chr20:30286905  | AL121897.2  | mixed       |                                                                                                                                                                                               | + | TtoC | 0.125  | 0.1667 | 6  | 2  | [12,16]   |
| chr20:18497935  | AL121900.5  | mixed       |                                                                                                                                                                                               | + | AtoG | 0.1136 | 0.1494 | 5  | 2  | [44,91]   |
| chr1:158915221  | AL121985.1  | mixed       |                                                                                                                                                                                               | + | TtoC | 0.1    | 0.1429 | 3  | 2  | [10,31]   |
| chr10:64235418  | AL133417.1  | mixed       |                                                                                                                                                                                               | - | AtoC | 0.1    | 0.1    | 3  | 2  | [10,10]   |
| chr14:101884411 | AL137229.4  | UTR3        |                                                                                                                                                                                               | - | TtoC | 0.1    | 0.1429 | 3  | 2  | [10,21]   |
| chr1:148547408  | AL138795.5  | mixed       |                                                                                                                                                                                               | - | CtoT | 0.1053 | 0.2    | 2  | 2  | [10,19]   |
| chr1:158782897  | AL138930.2  | mixed       |                                                                                                                                                                                               | + | TtoC | 0.1429 | 0.1667 | 3  | 2  | [12,14]   |
| chr14:27804555  | AL139023.1  | mixed       |                                                                                                                                                                                               | + | CtoT | 1      | 1      | 8  | 8  | [10,25]   |
| chr14:27804604  | AL139023.1  | mixed       |                                                                                                                                                                                               | + | CtoT | 1      | 1      | 14 | 14 | [16,55]   |
| chr14:27804662  | AL139023.1  | mixed       |                                                                                                                                                                                               | + | CtoT | 1      | 1      | 6  | 6  | [23,57]   |
| chr14:27804672  | AL139023.1  | mixed       |                                                                                                                                                                                               | + | GtoA | 0.2319 | 1      | 3  | 3  | [24,69]   |
| chr14:27804687  | AL139023.1  | mixed       |                                                                                                                                                                                               | + | GtoC | 1      | 1      | 5  | 5  | [36,82]   |
| chr14:27804753  | AL139023.1  | mixed       |                                                                                                                                                                                               | + | GtoC | 1      | 1      | 12 | 12 | [33,136]  |
| chr14:27804768  | AL139023.1  | mixed       |                                                                                                                                                                                               | + | GtoA | 0.9    | 1      | 12 | 12 | [11,58]   |
| chr14:27804783  | AL139023.1  | mixed       |                                                                                                                                                                                               | + | GtoC | 1      | 1      | 13 | 13 | [15,39]   |
| chr14:27804810  | AL139023.1  | mixed       |                                                                                                                                                                                               | + | CtoT | 1      | 1      | 18 | 18 | [15,76]   |
| chr14:27804827  | AL139023.1  | mixed       |                                                                                                                                                                                               | + | CtoT | 0.975  | 1      | 11 | 11 | [17,95]   |
| chr10:22658507  | AL157831.5  | mixed       |                                                                                                                                                                                               | - | TtoA | 0.1    | 0.1154 | 3  | 2  | [10,26]   |
| chr10:22659930  | AL157831.5  | mixed       |                                                                                                                                                                                               | - | AtoG | 0.1    | 0.125  | 2  | 2  | [10,16]   |
| chr13:20750240  | AL158032.5  | mixed       |                                                                                                                                                                                               | + | TtoA | 0.92   | 1      | 12 | 12 | [10,95]   |
| chr9:5068376    | AL161450.19 | mixed       |                                                                                                                                                                                               | - | TtoC | 0.1    | 0.1    | 2  | 2  | [10,10]   |
| chr1:151884755  | AL162258.1  | mixed       |                                                                                                                                                                                               | - | TtoC | 0.1    | 0.1818 | 2  | 2  | [10,11]   |
| chr9:95345441   | AL353629.3  | mixed       |                                                                                                                                                                                               | + | TtoG | 0.1    | 0.125  | 3  | 2  | [20,40]   |
| chr10:44818789  | AL353801.1  | mixed       |                                                                                                                                                                                               | - | AtoG | 0.1    | 0.1    | 4  | 2  | [10,20]   |
| chr9:130344178  | AL356481.4  | mixed       |                                                                                                                                                                                               | - | AtoC | 0.1176 | 0.3    | 3  | 2  | [11,17]   |
| chr6:354831     | AL357054.1  | mixed       |                                                                                                                                                                                               | + | CtoA | 0.4375 | 0.5    | 3  | 2  | [12,16]   |
| chr6:356309     | AL357054.1  | mixed       |                                                                                                                                                                                               | + | CtoA | 0.9965 | 1      | 20 | 20 | [220,571] |
| chr6:430523     | AL357054.1  | mixed       |                                                                                                                                                                                               | + | AtoG | 0.1    | 0.1    | 2  | 2  | [10,10]   |
| chr6:509128     | AL357054.1  | mixed       |                                                                                                                                                                                               | + | AtoT | 0.1    | 0.1818 | 5  | 2  | [10,12]   |
| chr6:574853     | AL357054.1  | mixed       |                                                                                                                                                                                               | + | AtoC | 0.1    | 0.1    | 2  | 2  | [10,10]   |
| chr6:28201381   | AL358933.2  | UTR3        |                                                                                                                                                                                               | - | GtoC | 0.4    | 0.9    | 8  | 8  | [10,20]   |
| chr9:130533046  | AL441992.3  | mixed       |                                                                                                                                                                                               | + | CtoT | 0.1667 | 0.1818 | 2  | 2  | [11,12]   |
| chr1:43942783   | AL451062.1  | mixed       |                                                                                                                                                                                               | - | AtoT | 0.1    | 0.1818 | 2  | 2  | [10,11]   |
| chr9:37077230   | AL512604.2  | mixed       |                                                                                                                                                                                               | + | TtoC | 0.1    | 0.1739 | 6  | 3  | [10,23]   |
| chr9:37078475   | AL512604.2  | mixed       |                                                                                                                                                                                               | + | GtoA | 0.25   | 0.5    | 3  | 3  | [16,76]   |
| chr9:37078811   | AL512604.2  | mixed       |                                                                                                                                                                                               | + | TtoG | 0.1429 | 0.2143 | 5  | 2  | [14,14]   |
| chr9:37078813   | AL512604.2  | mixed       |                                                                                                                                                                                               | + | AtoT | 0.1429 | 0.1538 | 5  | 2  | [13,14]   |
| chr9:37078878   | AL512604.2  | mixed       |                                                                                                                                                                                               | + | AtoG | 0.12   | 0.2667 | 3  | 2  | [15,25]   |
| chr9:37079031   | AL512604.2  | mixed       |                                                                                                                                                                                               | + | CtoT | 0.1    | 0.3077 | 3  | 2  | [10,13]   |
| chr1:159395260  | AL590714.2  | mixed       |                                                                                                                                                                                               | - | AtoT | 0.1818 | 0.2    | 4  | 2  | [10,23]   |
| chr1:224100804  | AL591895.1  | mixed       |                                                                                                                                                                                               | - | AtoG | 0.1579 | 0.2    | 3  | 2  | [11,19]   |
| chr1:46913700   | AL593856.3  | mixed       |                                                                                                                                                                                               | + | AtoG | 0.1176 | 0.1429 | 7  | 3  | [14,28]   |
| chr1:46915308   | AL593856.3  | mixed       |                                                                                                                                                                                               | + | CtoT | 0.1    | 0.1538 | 10 | 4  | [13,20]   |
| chr1:225685300  | AL606462.3  | mixed       |                                                                                                                                                                                               | + | GtoA | 0.9615 | 1      | 17 | 17 | [10,43]   |
| chr1:225685344  | AL606462.3  | mixed       |                                                                                                                                                                                               | + | CtoA | 0.1    | 0.1538 | 3  | 3  | [10,23]   |
| chr1:225685345  | AL606462.3  | mixed       |                                                                                                                                                                                               | + | AtoT | 0.1    | 0.1458 | 6  | 2  | [10,49]   |
| chr1:202639506  | AL606489.3  | mixed       |                                                                                                                                                                                               | + | AtoC | 0.1333 | 0.2    | 2  | 2  | [10,15]   |

|                 |            |             |                                                                                          |   |      |        |        |    |    |           |
|-----------------|------------|-------------|------------------------------------------------------------------------------------------|---|------|--------|--------|----|----|-----------|
| chr1:202639507  | ALG06489.3 | mixed       |                                                                                          | + | AtoT | 0.1538 | 0.1818 | 2  | 2  | [11,13]   |
| chr1:202640808  | ALG06489.3 | mixed       |                                                                                          | + | GtoT | 0.1    | 0.1    | 2  | 2  | [10,10]   |
| chr1:202641827  | ALG06489.3 | mixed       |                                                                                          | + | AtoT | 0.1    | 0.1    | 2  | 2  | [10,10]   |
| chr1:202645728  | ALG06489.3 | mixed       |                                                                                          | + | TtoC | 0.1    | 0.1    | 2  | 2  | [10,10]   |
| chr1:202646998  | ALG06489.3 | mixed       |                                                                                          | + | CtoA | 0.1    | 0.1    | 2  | 2  | [11,11]   |
| chr1:202660460  | ALG06489.3 | mixed       |                                                                                          | + | AtoG | 0.1    | 0.1    | 2  | 2  | [10,10]   |
| chr1:15926588   | ALG06758.1 | mixed       |                                                                                          | - | AtoG | 0.1    | 0.2    | 2  | 2  | [10,10]   |
| chr1:15933812   | ALG06758.1 | mixed       |                                                                                          | - | AtoG | 0.1111 | 0.1667 | 12 | 3  | [17,27]   |
| chr6:32736410   | AL662789.4 | mixed       |                                                                                          | - | TtoC | 0.2308 | 0.5    | 2  | 2  | [13,14]   |
| chr6:32737723   | AL662789.4 | mixed       |                                                                                          | - | GtoT | 0.1    | 0.25   | 4  | 3  | [12,20]   |
| chr6:32737725   | AL662789.4 | mixed       |                                                                                          | - | TtoC | 0.1579 | 0.1818 | 4  | 2  | [11,19]   |
| chr6:32737727   | AL662789.4 | mixed       |                                                                                          | - | AtoT | 0.1    | 0.1818 | 2  | 2  | [10,12]   |
| chr6:30335478   | AL662795.1 | mixed       |                                                                                          | + | GtoT | 0.6364 | 0.9333 | 4  | 4  | [10,29]   |
| chr6:30336358   | AL662795.1 | mixed       |                                                                                          | + | AtoG | 0.3571 | 0.9245 | 4  | 4  | [14,83]   |
| chr6:30336961   | AL662795.1 | mixed       |                                                                                          | + | TtoC | 0.2632 | 0.9565 | 4  | 4  | [19,91]   |
| chr6:30336971   | AL662795.1 | mixed       |                                                                                          | + | GtoA | 0.1667 | 0.5    | 5  | 5  | [10,16]   |
| chr6:30336985   | AL662795.1 | mixed       |                                                                                          | + | GtoC | 0.2    | 0.3636 | 2  | 2  | [10,11]   |
| chr6:30337185   | AL662795.1 | mixed       |                                                                                          | + | TtoC | 0.1    | 0.9615 | 8  | 8  | [10,72]   |
| chr6:30337201   | AL662795.1 | mixed       |                                                                                          | + | TtoC | 0.8269 | 0.9838 | 9  | 9  | [71,495]  |
| chr6:30337213   | AL662795.1 | mixed       |                                                                                          | + | AtoG | 0.1667 | 0.9845 | 10 | 10 | [41,589]  |
| chr6:30337235   | AL662795.1 | mixed       |                                                                                          | + | GtoA | 0.1429 | 0.2424 | 3  | 2  | [14,33]   |
| chr6:30337346   | AL662795.1 | mixed       |                                                                                          | + | CtoA | 0.1    | 0.4375 | 7  | 5  | [10,50]   |
| chr6:30337347   | AL662795.1 | mixed       |                                                                                          | + | GtoA | 0.1    | 0.8667 | 9  | 8  | [10,187]  |
| chr6:30337353   | AL662795.1 | mixed       |                                                                                          | + | TtoC | 0.1667 | 0.9868 | 12 | 12 | [13,116]  |
| chr6:30337384   | AL662795.1 | mixed       |                                                                                          | + | GtoA | 0.1333 | 0.3333 | 5  | 4  | [10,30]   |
| chr6:30337386   | AL662795.1 | mixed       |                                                                                          | + | TtoC | 0.1765 | 0.2    | 3  | 2  | [11,17]   |
| chr6:30780408   | AL662797.2 | mixed       |                                                                                          | + | TtoC | 0.1    | 0.1176 | 2  | 2  | [10,17]   |
| chr1:20942196   | AL663074.1 | mixed       |                                                                                          | + | CtoT | 0.1    | 0.25   | 7  | 2  | [10,12]   |
| chr6:32921691   | AL669918.1 | mixed       |                                                                                          | + | TtoC | 0.1    | 0.1071 | 9  | 2  | [28,40]   |
| chr6:32630486   | AL713966.1 | mixed       |                                                                                          | - | TtoC | 0.1111 | 0.125  | 2  | 2  | [10,24]   |
| chr6:32630527   | AL713966.1 | mixed       |                                                                                          | - | GtoA | 0.2418 | 0.867  | 2  | 2  | [183,189] |
| chr6:32630530   | AL713966.1 | mixed       |                                                                                          | - | GtoT | 0.1017 | 0.1282 | 6  | 2  | [41,59]   |
| chr6:32630557   | AL713966.1 | mixed       |                                                                                          | - | AtoG | 0.1    | 0.1739 | 2  | 2  | [11,23]   |
| chr6:32630680   | AL713966.1 | mixed       |                                                                                          | - | TtoG | 0.96   | 0.9767 | 2  | 2  | [25,43]   |
| chr6:32630700   | AL713966.1 | mixed       |                                                                                          | - | GtoT | 0.1009 | 0.1453 | 4  | 2  | [234,545] |
| chr6:32630718   | AL713966.1 | mixed       |                                                                                          | - | AtoG | 0.9811 | 1      | 4  | 4  | [53,358]  |
| chr6:32630724   | AL713966.1 | mixed       |                                                                                          | - | CtoT | 1      | 1      | 2  | 2  | [81,88]   |
| chr21:45172621  | AL844908.1 | mixed       |                                                                                          | + | CtoA | 0.1    | 0.1    | 2  | 2  | [10,10]   |
| chr1:38038070   | AL929472.1 | mixed       |                                                                                          | - | AtoG | 0.1    | 0.2308 | 2  | 2  | [10,14]   |
| chr9:115192920  | ALAD       | coding_exon | ENST00000277315:YtoN;ENST00000374173:YtoN;ENST00000409155:YtoN;                          | - | TtoA | 0.125  | 0.1818 | 4  | 2  | [11,16]   |
| chr9:115189164  | ALAD       | UTR3        |                                                                                          | - | TtoA | 0.1538 | 0.1667 | 5  | 2  | [12,13]   |
| chr9:115189168  | ALAD       | UTR3        |                                                                                          | - | TtoC | 0.1538 | 0.2    | 4  | 2  | [10,13]   |
| chr9:115189169  | ALAD       | UTR3        |                                                                                          | - | GtoT | 0.1333 | 0.1818 | 3  | 2  | [11,15]   |
| chr3:106754077  | ALCAM      | coding_exon | ENST00000306107:LtoR;ENST00000389926:LtoR;ENST00000389927:LtoR;ENST00000389928:LtoR;     | + | TtoG | 0.1    | 0.125  | 4  | 2  | [10,16]   |
| chr3:10677404   | ALCAM      | UTR3        |                                                                                          | - | TtoC | 0.1    | 0.1818 | 2  | 2  | [10,11]   |
| chr19:54659731  | ALDH16A1   | coding_exon | ENST00000293350:TtoP;ENST00000455361:TtoP;                                               | + | AtoC | 0.1    | 0.1    | 2  | 2  | [10,10]   |
| chr10:97361033  | ALDH18A1   | coding_exon | ENST00000371221:StoA;ENST00000371224:StoA;                                               | - | TtoG | 0.1053 | 0.1154 | 2  | 2  | [26,40]   |
| chr10:97355780  | ALDH18A1   | UTR3        |                                                                                          | - | TtoC | 0.1053 | 0.1111 | 7  | 2  | [18,19]   |
| chr9:38387268   | ALDH1B1    | coding_exon | ENST00000377698:VtoA;                                                                    | + | TtoC | 0.1212 | 0.1667 | 5  | 3  | [12,34]   |
| chr12:110714311 | ALDH2      | coding_exon | ENST00000261733:GtoR;ENST00000416293:GtoR;                                               | + | GtoA | 0.1    | 0.1111 | 2  | 2  | [10,18]   |
| chr6:24636277   | ALDH5A1    | coding_exon | ENST00000348925:GtoE;ENST00000357578:GtoE;ENST00000491546:GtoE;                          | + | GtoA | 0.1053 | 0.1111 | 3  | 2  | [18,19]   |
| chr1:163931204  | ALDH9A1    | coding_exon | ENST00000354775:VtoG;                                                                    | - | TtoG | 0.1    | 0.1333 | 2  | 2  | [10,15]   |
| chr16:29989236  | ALDOA      | UTR3        |                                                                                          | + | AtoG | 0.117  | 0.1189 | 7  | 2  | [101,150] |
| chr16:29989237  | ALDOA      | UTR3        |                                                                                          | + | GtoA | 0.5165 | 0.8511 | 14 | 14 | [47,194]  |
| chr16:29989238  | ALDOA      | UTR3        |                                                                                          | + | TtoA | 0.5    | 0.6667 | 3  | 3  | [11,17]   |
| chr17:23924270  | ALDOC      | UTR3        |                                                                                          | - | AtoG | 0.1    | 0.15   | 6  | 4  | [10,28]   |
| chr14:77210115  | ALKBH1     | coding_exon |                                                                                          | - | TtoG | 0.1    | 0.1    | 2  | 2  | [10,10]   |
| chr12:108010630 | ALKBH2     | coding_exon | ENST00000343075:IttoV;ENST00000429722:IttoV;ENST00000435370:IttoV;                       | - | AtoG | 0.1176 | 0.125  | 2  | 2  | [16,17]   |
| chr12:108010584 | ALKBH2     | coding_exon | ENST00000343075:HtoR;ENST00000429722:HtoR;ENST00000435370:HtoR;ENST00000435370:HtoR;     | - | AtoG | 0.1    | 0.1053 | 7  | 2  | [10,19]   |
| chr7:101885422  | ALKBH4     | coding_exon |                                                                                          | - | CtoG | 0.1    | 0.1    | 3  | 2  | [10,10]   |
| chr7:101884654  | ALKBH4     | UTR3        |                                                                                          | - | GtoA | 0.1    | 0.1    | 2  | 2  | [10,10]   |
| chr17:18053854  | ALKBH5     | UTR3        |                                                                                          | + | TtoC | 0.1091 | 0.1429 | 10 | 3  | [56,126]  |
| chr11:106880962 | ALKBH8     | mixed       |                                                                                          | - | GtoA | 0.1    | 0.1    | 2  | 2  | [10,10]   |
| chr4:113571881  | ALPK1      | coding_exon | ENST00000177648:StoG;ENST00000458497:StoG;                                               | + | AtoG | 0.1    | 0.25   | 3  | 2  | [10,16]   |
| chr4:113581570  | ALPK1      | coding_exon | ENST00000177648:QtoR;ENST00000458497:QtoR;                                               | + | AtoG | 0.1    | 0.125  | 2  | 2  | [10,16]   |
| chr4:113572115  | ALPK1      | coding_exon | ENST00000177648:NtoD;ENST00000458497:NtoD;                                               | + | AtoG | 0.1    | 0.1667 | 2  | 2  | [10,12]   |
| chr4:113572817  | ALPK1      | coding_exon | ENST00000177648:NtoD;ENST00000458497:NtoD;                                               | + | AtoG | 0.1    | 0.1053 | 2  | 2  | [10,19]   |
| chr4:113566354  | ALPK1      | coding_exon | ENST00000177648:LtoP;ENST00000458497:LtoP;                                               | + | TtoC | 0.1    | 0.1176 | 3  | 2  | [10,17]   |
| chr4:113581710  | ALPK1      | coding_exon | ENST00000177648:CtoG;ENST00000458497:CtoG;                                               | + | TtoG | 0.1    | 0.1667 | 5  | 3  | [10,13]   |
| chr4:113571103  | ALPK1      | coding_exon |                                                                                          | + | TtoC | 0.1    | 0.1    | 2  | 2  | [10,10]   |
| chr2:202199066  | ALS2CR4    | coding_exon | ENST00000396902:LtoI;ENST00000396905:LtoI;ENST00000409099:LtoI;ENST00000409100:LtoI;     | - | CtoA | 0.1    | 0.1    | 2  | 2  | [10,10]   |
| chr11:46520669  | AMBRA1     | coding_exon | ENST00000298834:StoP;ENST00000314823:StoP;ENST00000314845:StoP;ENST00000314846:StoP;     | - | TtoC | 0.1    | 0.15   | 2  | 2  | [10,20]   |
| chr11:46396045  | AMBRA1     | coding_exon | ENST00000298834:RtoQ;ENST00000314823:RtoQ;ENST00000314845:RtoQ;ENST00000314846:RtoQ;     | - | GtoA | 0.1    | 0.1    | 2  | 2  | [10,10]   |
| chr11:46396043  | AMBRA1     | coding_exon | ENST00000298834:PtoA;ENST00000314823:PtoA;ENST00000314845:PtoA;ENST00000314846:PtoA;     | - | CtoG | 0.1    | 0.1    | 2  | 2  | [10,10]   |
| chr16:54954210  | AMFR       | mixed       |                                                                                          | - | TtoG | 0.1    | 0.1053 | 5  | 2  | [10,19]   |
| chr16:54953428  | AMFR       | UTR3        |                                                                                          | - | TtoG | 0.1053 | 0.2308 | 9  | 6  | [10,20]   |
| chr2:128336224  | AMMECR1L   | UTR3        |                                                                                          | - | TtoA | 0.1    | 0.1667 | 2  | 2  | [12,22]   |
| chr2:128337474  | AMMECR1L   | UTR3        |                                                                                          | - | GtoT | 0.1    | 0.1667 | 2  | 2  | [12,20]   |
| chr2:128337724  | AMMECR1L   | UTR3        |                                                                                          | - | AtoT | 0.1    | 0.1    | 2  | 2  | [10,10]   |
| chr11:10473084  | AMPD3      | coding_exon | ENST00000256183:StoR;ENST00000396553:StoR;ENST00000431080:StoR;ENST00000431081:StoR;     | + | TtoG | 0.1    | 0.1333 | 2  | 2  | [10,15]   |
| chr11:10475011  | AMPD3      | coding_exon | ENST00000256183:AttoR;ENST00000396553:AttoR;ENST00000431080:AttoR;ENST00000431081:AttoR; | + | GtoA | 0.1    | 0.1    | 2  | 2  | [10,10]   |
| chr17:77451416  | ANAPC11    | UTR3        |                                                                                          | + | AtoG | 0.1    | 0.1429 | 2  | 2  | [10,14]   |
| chr4:25005570   | ANAPC4     | coding_exon | ENST00000315368:StoT;                                                                    | + | TtoA | 0.1    | 0.1    | 2  | 2  | [10,10]   |
| chr14:76342725  | ANGEL1     | coding_exon |                                                                                          | - | AtoG | 0.1    | 0.2    | 2  | 2  | [10,10]   |
| chr17:4020759   | ANKFY1     | coding_exon |                                                                                          | - | GtoA | 0.1    | 0.1    | 3  | 2  | [10,10]   |
| chr17:4031414   | ANKFY1     | coding_exon |                                                                                          | - | CtoG | 0.1    | 0.1    | 2  | 2  | [10,10]   |
| chr17:4014320   | ANKFY1     | UTR3        |                                                                                          | - | AtoG | 0.1    | 0.1429 | 3  | 3  | [10,14]   |
| chr17:4014416   | ANKFY1     | UTR3        |                                                                                          | - | TtoA | 0.1    | 0.1    | 2  | 2  | [10,10]   |
| chr17:4015175   | ANKFY1     | UTR3        |                                                                                          | - | TtoA | 0.1    | 0.1    | 2  | 2  | [10,10]   |
| chr17:4015839   | ANKFY1     | UTR3        |                                                                                          | - | GtoA | 0.1    | 0.1    | 2  | 2  | [10,10]   |
| chr5:14763154   | ANKH       | UTR3        |                                                                                          | - | TtoG | 0.12   | 0.2    | 3  | 2  | [10,25]   |
| chr5:139888199  | ANKHD1     | coding_exon |                                                                                          | + | TtoA | 0.1    | 0.125  | 10 | 2  | [11,24]   |
| chr5:139832072  | ANKHD1     | mixed       |                                                                                          | + | TtoC | 0.1    | 0.1053 | 5  | 2  | [10,19]   |
| chr5:139857026  | ANKHD1     | mixed       |                                                                                          | + | AtoG | 0.1    | 0.1    | 4  | 2  | [10,10]   |
| chr5:139899251  | ANKHD1     | mixed       |                                                                                          | + | AtoG | 0.125  | 0.2    | 2  | 2  | [10,17]   |
| chr7:91853839   | ANKIB1     | coding_exon |                                                                                          | + | TtoC | 0.1    | 0.125  | 3  | 2  | [10,16]   |

|                 |            |             |                                                                                                                                                                                                                                                              |   |      |        |        |    |    |         |
|-----------------|------------|-------------|--------------------------------------------------------------------------------------------------------------------------------------------------------------------------------------------------------------------------------------------------------------|---|------|--------|--------|----|----|---------|
| chr7:91867416   | ANKB1      | UTR3        |                                                                                                                                                                                                                                                              | + | AtoC | 0.1    | 0.1111 | 3  | 2  | [10,18] |
| chr12:131837446 | ANKL2      | coding_exon | ENST00000337516:StoP;ENST00000357997:StoP;                                                                                                                                                                                                                   | - | TtoC | 0.1053 | 0.1333 | 5  | 3  | [15,19] |
| chr12:131812951 | ANKL2      | UTR3        |                                                                                                                                                                                                                                                              | - | TtoA | 0.125  | 0.1333 | 7  | 2  | [15,24] |
| chr5:72887166   | ANKRA2     | coding_exon | ENST00000296785:EtaG;                                                                                                                                                                                                                                        | - | AtoG | 0.1    | 0.1    | 3  | 2  | [10,20] |
| chr13:110343528 | ANKRD10    | coding_exon | ENST00000267339:LtoP;                                                                                                                                                                                                                                        | - | TtoC | 0.125  | 0.1351 | 4  | 2  | [16,37] |
| chr13:110356382 | ANKRD10    | coding_exon | ENST00000267339:DtoN;ENST00000310847:EtaG;ENST00000375758:DtoN;                                                                                                                                                                                              | - | GtoA | 0.1429 | 0.1765 | 7  | 3  | [14,20] |
| chr13:110356381 | ANKRD10    | coding_exon | ENST00000267339:DtoG;ENST00000310847:EtaG;ENST00000375758:DtoG;                                                                                                                                                                                              | - | AtoG | 0.1111 | 0.2778 | 12 | 10 | [14,26] |
| chr13:110330460 | ANKRD10    | coding_exon | ENST00000267339:DtoG;                                                                                                                                                                                                                                        | - | AtoG | 0.1    | 0.1111 | 5  | 2  | [10,18] |
| chr13:110343611 | ANKRD10    | coding_exon | ENST00000267339:DtoE;ENST00000310847:PtoA;                                                                                                                                                                                                                   | - | CtoG | 0.1154 | 0.1739 | 15 | 8  | [12,37] |
| chr13:110344637 | ANKRD10    | coding_exon |                                                                                                                                                                                                                                                              | - | AtoT | 0.1818 | 0.6364 | 4  | 4  | [10,15] |
| chr13:110344640 | ANKRD10    | coding_exon |                                                                                                                                                                                                                                                              | - | CtoT | 0.1176 | 0.4375 | 9  | 7  | [14,29] |
| chr13:110329705 | ANKRD10    | UTR3        |                                                                                                                                                                                                                                                              | - | TtoC | 0.1    | 0.1333 | 2  | 2  | [10,15] |
| chr16:87877303  | ANKRD11    | coding_exon | ENST00000301030:KtoE;                                                                                                                                                                                                                                        | - | AtoG | 0.1    | 0.1429 | 5  | 2  | [10,14] |
| chr16:87880093  | ANKRD11    | coding_exon |                                                                                                                                                                                                                                                              | - | GtoT | 0.125  | 0.2308 | 9  | 6  | [20,33] |
| chr16:87910986  | ANKRD11    | UTR5        |                                                                                                                                                                                                                                                              | - | AtoC | 0.1    | 0.2162 | 13 | 10 | [10,37] |
| chr18:9246257   | ANKRD12    | coding_exon | ENST00000262126:LtoV;ENST00000383440:LtoV;                                                                                                                                                                                                                   | + | TtoG | 0.1    | 0.1429 | 3  | 2  | [14,20] |
| chr18:9246208   | ANKRD12    | coding_exon | ENST00000262126:KtoE;ENST00000383440:KtoE;                                                                                                                                                                                                                   | + | AtoG | 0.1034 | 0.1429 | 6  | 3  | [14,30] |
| chr18:9246268   | ANKRD12    | coding_exon | ENST00000262126:EtaD;ENST00000383440:EtaD;                                                                                                                                                                                                                   | + | AtoT | 0.1    | 0.1429 | 2  | 2  | [10,14] |
| chr12:108952891 | ANKRD13A   | coding_exon | ENST00000261739:CtoW;ENST00000334689:VtoG;                                                                                                                                                                                                                   | + | TtoG | 0.1    | 0.1    | 2  | 2  | [10,10] |
| chr12:108950703 | ANKRD13A   | mixed       |                                                                                                                                                                                                                                                              | + | CtoA | 0.1    | 0.1176 | 3  | 2  | [10,17] |
| chr12:108951756 | ANKRD13A   | mixed       |                                                                                                                                                                                                                                                              | + | TtoC | 0.1053 | 0.125  | 4  | 2  | [16,19] |
| chr12:108961214 | ANKRD13A   | UTR3        |                                                                                                                                                                                                                                                              | + | TtoA | 0.1053 | 0.2    | 3  | 3  | [15,28] |
| chr12:108961256 | ANKRD13A   | UTR3        |                                                                                                                                                                                                                                                              | + | GtoT | 0.1    | 0.1429 | 5  | 2  | [10,14] |
| chr4:74209613   | ANKRD17    | coding_exon | ENST00000330838:TtoP;ENST00000358602:TtoP;ENST00000411811:TtoP;                                                                                                                                                                                              | - | AtoC | 0.1    | 0.1111 | 2  | 2  | [10,27] |
| chr4:74231850   | ANKRD17    | coding_exon | ENST00000330838:LtoF;ENST00000358602:LtoF;ENST00000411811:LtoF;ENST00000330838:HtoD;ENST00000358602:HtoD;ENST00000411811:HtoD;ENST00000330838:AtoV;ENST00000358602:AtoV;ENST00000411811:AtoV;ENST00000330838:MtoL;ENST00000358602:MtoL;ENST00000411811:MtoL; | - | GtoT | 0.1    | 0.1    | 3  | 2  | [10,10] |
| chr4:74231855   | ANKRD17    | coding_exon | ENST00000330838:HtoD;ENST00000358602:HtoD;ENST00000411811:HtoD;ENST00000330838:AtoV;ENST00000358602:AtoV;ENST00000411811:AtoV;ENST00000330838:MtoL;ENST00000358602:MtoL;ENST00000411811:MtoL;                                                                | - | CtoG | 0.1    | 0.1053 | 2  | 2  | [10,19] |
| chr4:74231971   | ANKRD17    | coding_exon | ENST00000330838:AtoV;ENST00000358602:AtoV;ENST00000411811:AtoV;ENST00000330838:MtoL;ENST00000358602:MtoL;ENST00000411811:MtoL;                                                                                                                               | - | CtoT | 0.1    | 0.1    | 3  | 2  | [10,10] |
| chr4:74160436   | ANKRD17    | UTR3        |                                                                                                                                                                                                                                                              | - | AtoG | 0.1111 | 0.1818 | 8  | 5  | [10,22] |
| chr4:74160549   | ANKRD17    | UTR3        |                                                                                                                                                                                                                                                              | - | TtoG | 0.1    | 0.1176 | 3  | 2  | [10,17] |
| chr10:27363927  | ANKRD26    | mixed       |                                                                                                                                                                                                                                                              | - | CtoT | 0.1    | 0.1429 | 2  | 2  | [10,14] |
| chr10:27382276  | ANKRD26    | mixed       |                                                                                                                                                                                                                                                              | - | GtoA | 0.1    | 0.1    | 2  | 2  | [10,10] |
| chr19:37822170  | ANKRD27    | coding_exon | ENST00000306065:YtoN;                                                                                                                                                                                                                                        | - | TtoA | 0.1    | 0.1    | 3  | 2  | [10,10] |
| chr19:37779912  | ANKRD27    | UTR3        |                                                                                                                                                                                                                                                              | - | AtoT | 0.1053 | 0.6154 | 2  | 2  | [13,19] |
| chr19:37780528  | ANKRD27    | UTR3        |                                                                                                                                                                                                                                                              | - | TtoC | 0.1    | 0.1    | 2  | 2  | [10,10] |
| chr3:15728653   | ANKRD28    | coding_exon | ENST00000383776:StoL;ENST00000383777:StoL;ENST00000399451:StoL;ENST00000383776:StoL;ENST00000383777:StoL;ENST00000399451:StoL;                                                                                                                               | - | CtoT | 0.1    | 0.1    | 2  | 2  | [10,10] |
| chr3:15686465   | ANKRD28    | UTR3        |                                                                                                                                                                                                                                                              | - | CtoA | 0.1    | 0.1    | 2  | 2  | [10,10] |
| chr17:46127831  | ANKRD40    | UTR3        |                                                                                                                                                                                                                                                              | - | AtoG | 0.1    | 0.1    | 2  | 2  | [10,10] |
| chr17:46127837  | ANKRD40    | UTR3        |                                                                                                                                                                                                                                                              | - | AtoG | 0.1    | 0.1667 | 6  | 2  | [10,12] |
| chr17:46128070  | ANKRD40    | UTR3        |                                                                                                                                                                                                                                                              | - | GtoC | 0.1053 | 0.15   | 4  | 3  | [18,20] |
| chr2:197571326  | ANKRD44    | coding_exon | ENST00000328737:LtoV;ENST00000450567:LtoV;                                                                                                                                                                                                                   | - | TtoG | 0.1    | 0.12   | 3  | 2  | [10,25] |
| chr2:197659675  | ANKRD44    | coding_exon | ENST00000328737:DtoE;ENST00000409153:DtoE;ENST00000450567:DtoE;                                                                                                                                                                                              | - | TtoA | 0.1    | 0.1    | 2  | 2  | [10,10] |
| chr12:54918821  | ANKRD52    | UTR3        |                                                                                                                                                                                                                                                              | - | TtoC | 0.1    | 0.1304 | 3  | 2  | [10,23] |
| chr12:54921508  | ANKRD52    | UTR3        |                                                                                                                                                                                                                                                              | - | TtoG | 0.1111 | 0.1818 | 4  | 3  | [10,24] |
| chr6:35165575   | ANKS1A     | UTR3        |                                                                                                                                                                                                                                                              | + | AtoG | 0.1    | 0.1    | 2  | 2  | [10,10] |
| chr16:4691135   | ANKS3      | coding_exon | ENST00000304283:DtoV;ENST00000446014:DtoV;ENST00000450067:DtoV;                                                                                                                                                                                              | - | AtoT | 0.1    | 0.1    | 2  | 2  | [10,10] |
| chr9:100585840  | ANKS6      | coding_exon |                                                                                                                                                                                                                                                              | - | TtoC | 0.6    | 0.9167 | 2  | 2  | [10,12] |
| chr2:219807313  | ANKZF1     | coding_exon |                                                                                                                                                                                                                                                              | + | AtoG | 0.125  | 0.2308 | 7  | 2  | [13,16] |
| chr3:43593203   | ANO10      | coding_exon | ENST00000292246:FtoL;ENST00000396091:FtoL;ENST00000396092:FtoL;ENST00000292246:FtoL;ENST00000396091:FtoL;ENST00000396092:FtoL;                                                                                                                               | - | TtoA | 0.1    | 0.1818 | 3  | 2  | [10,11] |
| chr12:44109524  | ANO6       | mixed       |                                                                                                                                                                                                                                                              | + | AtoT | 0.1    | 0.1    | 3  | 2  | [10,10] |
| chr12:44111448  | ANO6       | mixed       |                                                                                                                                                                                                                                                              | + | TtoC | 0.1    | 0.1538 | 4  | 2  | [10,13] |
| chr12:44111584  | ANO6       | mixed       |                                                                                                                                                                                                                                                              | + | GtoA | 0.1    | 0.2    | 3  | 3  | [10,12] |
| chr11:409582    | ANO9       | coding_exon | ENST00000332826:DtoG;ENST00000412024:DtoG;                                                                                                                                                                                                                   | - | AtoG | 0.1667 | 0.2    | 5  | 2  | [10,12] |
| chr11:408813    | ANO9       | coding_exon |                                                                                                                                                                                                                                                              | - | AtoG | 0.1    | 0.1087 | 6  | 2  | [10,46] |
| chr11:408336    | ANO9       | UTR3        |                                                                                                                                                                                                                                                              | - | GtoT | 0.1    | 0.1    | 2  | 2  | [10,10] |
| chr15:66863951  | ANP32A     | coding_exon | ENST00000358235:NtoS;ENST00000465139:NtoS;                                                                                                                                                                                                                   | - | AtoG | 0.1    | 0.1    | 2  | 2  | [10,10] |
| chr15:66866841  | ANP32A     | coding_exon | ENST00000358235:NtoD;ENST00000465139:NtoD;                                                                                                                                                                                                                   | - | AtoG | 0.1351 | 0.4375 | 14 | 11 | [14,47] |
| chr15:66866825  | ANP32A     | coding_exon | ENST00000358235:LtoP;ENST00000465139:LtoP;                                                                                                                                                                                                                   | - | TtoC | 0.2    | 0.4118 | 9  | 9  | [10,18] |
| chr15:66867257  | ANP32A     | coding_exon | ENST00000358235:LtoP;ENST00000465139:LtoP;                                                                                                                                                                                                                   | - | TtoC | 0.1111 | 0.1818 | 4  | 2  | [12,20] |
| chr15:66866826  | ANP32A     | coding_exon | ENST00000358235:LtoL;ENST00000465139:LtoL;                                                                                                                                                                                                                   | - | CtoA | 0.1    | 0.1333 | 7  | 2  | [10,15] |
| chr15:66859824  | ANP32A     | coding_exon | ENST00000358235:EtaK;ENST00000465139:EtaK;                                                                                                                                                                                                                   | - | GtoA | 0.125  | 0.1429 | 4  | 2  | [15,16] |
| chr15:66858357  | ANP32A     | UTR3        |                                                                                                                                                                                                                                                              | - | AtoG | 0.1    | 0.2    | 2  | 2  | [10,15] |
| chr15:66858358  | ANP32A     | UTR3        |                                                                                                                                                                                                                                                              | - | AtoG | 0.125  | 0.3    | 8  | 4  | [10,24] |
| chr15:66859049  | ANP32A     | UTR3        |                                                                                                                                                                                                                                                              | - | AtoC | 0.1053 | 0.2143 | 8  | 5  | [20,48] |
| chr9:99800767   | ANP32B     | coding_exon | ENST00000339399:TtoP;                                                                                                                                                                                                                                        | + | AtoC | 0.1    | 0.1176 | 7  | 2  | [11,18] |
| chr9:99800751   | ANP32B     | coding_exon | ENST00000339399:KtoN;                                                                                                                                                                                                                                        | + | AtoT | 0.1071 | 0.1111 | 3  | 2  | [18,28] |
| chr10:81905325  | ANXA11     | UTR3        |                                                                                                                                                                                                                                                              | - | AtoG | 0.1053 | 0.1667 | 7  | 3  | [12,19] |
| chr10:81905357  | ANXA11     | UTR3        |                                                                                                                                                                                                                                                              | - | TtoA | 0.1042 | 0.125  | 7  | 2  | [26,48] |
| chr4:122808662  | ANXA5      | UTR3        |                                                                                                                                                                                                                                                              | - | TtoC | 0.1081 | 0.1429 | 6  | 2  | [14,38] |
| chr4:122808829  | ANXA5      | UTR3        |                                                                                                                                                                                                                                                              | - | AtoG | 0.1    | 0.1667 | 6  | 3  | [12,20] |
| chr5:150460531  | ANXA6      | UTR3        |                                                                                                                                                                                                                                                              | - | TtoC | 0.1429 | 0.1429 | 4  | 2  | [14,14] |
| chr6:18321959   | AOF1       | coding_exon | ENST00000297792:LtoL;ENST00000388869:LtoL;ENST00000388870:LtoL;ENST00000297792:LtoL;ENST00000388869:LtoL;ENST00000388870:LtoL;                                                                                                                               | + | CtoA | 0.1    | 0.1    | 2  | 2  | [10,10] |
| chr21:33558358  | AP000295.1 | mixed       |                                                                                                                                                                                                                                                              | - | TtoC | 0.1364 | 0.1818 | 5  | 2  | [11,22] |
| chr21:33558677  | AP000295.1 | mixed       |                                                                                                                                                                                                                                                              | - | TtoC | 0.1    | 0.1818 | 7  | 2  | [10,11] |
| chr21:33558678  | AP000295.1 | mixed       |                                                                                                                                                                                                                                                              | - | AtoT | 0.1    | 0.1429 | 6  | 3  | [10,19] |
| chr22:22355974  | AP000347.4 | mixed       |                                                                                                                                                                                                                                                              | - | TtoC | 0.1    | 0.1    | 4  | 2  | [10,10] |
| chr11:65026864  | AP000769.2 | coding_exon | ENST00000413499:MtoL;                                                                                                                                                                                                                                        | - | AtoT | 0.2    | 0.6667 | 4  | 4  | [11,18] |
| chr18:2792673   | AP001011.3 | UTR3        |                                                                                                                                                                                                                                                              | + | TtoC | 0.1    | 0.1111 | 4  | 2  | [10,19] |
| chr21:44404137  | AP001055.1 | mixed       |                                                                                                                                                                                                                                                              | - | GtoA | 0.1    | 0.125  | 3  | 3  | [10,17] |
| chr11:65869506  | AP001107.1 | UTR3        |                                                                                                                                                                                                                                                              | - | AtoG | 0.1    | 0.1    | 3  | 2  | [10,10] |
| chr11:65116047  | AP001362.1 | mixed       |                                                                                                                                                                                                                                                              | - | TtoC | 0.1042 | 0.1667 | 7  | 4  | [24,48] |
| chr11:113776699 | AP002373.1 | coding_exon | ENST00000375490:QtoH;                                                                                                                                                                                                                                        | + | GtoT | 0.1    | 0.1    | 2  | 2  | [10,10] |
| chr11:116233829 | AP006216.1 | coding_exon | ENST00000292055:LtoL;ENST00000375288:LtoL;ENST00000375300:LtoL;ENST00000292055:LtoL;ENST00000375288:LtoL;ENST00000375300:LtoL;                                                                                                                               | - | CtoA | 0.1    | 0.25   | 7  | 3  | [10,16] |
| chr11:116249516 | AP006216.1 | mixed       |                                                                                                                                                                                                                                                              | - | TtoG | 0.1    | 0.1667 | 2  | 2  | [11,12] |
| chr11:116249525 | AP006216.1 | mixed       |                                                                                                                                                                                                                                                              | - | TtoG | 0.1    | 0.1    | 3  | 2  | [10,10] |
| chr22:28053844  | AP1B1      | UTR3        |                                                                                                                                                                                                                                                              | - | TtoA | 0.1429 | 0.2857 | 10 | 7  | [11,25] |
| chr16:70330666  | AP1G1      | mixed       |                                                                                                                                                                                                                                                              | - | AtoC | 0.1    | 0.125  | 6  | 3  | [16,20] |
| chr14:23101337  | AP1G2      | coding_exon | ENST00000308724:NtoS;ENST00000397120:NtoS;                                                                                                                                                                                                                   | - | AtoG | 0.1034 | 0.25   | 8  | 3  | [16,29] |
| chr14:23101015  | AP1G2      | coding_exon | ENST00000308724:MtoL;ENST00000397120:MtoL;                                                                                                                                                                                                                   | - | AtoC | 0.1053 | 0.1333 | 5  | 4  | [15,38] |
| chr14:23101013  | AP1G2      | coding_exon | ENST00000308724:MtoL;ENST00000397120:MtoL;                                                                                                                                                                                                                   | - | GtoC | 0.1026 | 0.2    | 6  | 3  | [20,39] |
| chr14:23103065  | AP1G2      | coding_exon |                                                                                                                                                                                                                                                              | - | AtoG | 0.1    | 0.1    | 2  | 2  | [10,10] |
| chr14:23106368  | AP1G2      | UTR5        |                                                                                                                                                                                                                                                              | - | TtoC | 0.1    | 0.1538 | 3  | 2  | [10,27] |
| chr17:33005096  | AP1GBP1    | coding_exon | ENST00000339208:RtoT;ENST00000345615:RtoT;ENST00000346661:RtoT;ENST00000339208:RtoT;ENST00000345615:RtoT;ENST00000346661:RtoT;                                                                                                                               | - | GtoC | 0.1    | 0.1429 | 2  | 2  | [10,14] |
| chr17:33006038  | AP1GBP1    | coding_exon | ENST00000339208:LtoL;ENST00000345615:LtoL;ENST00000346661:LtoL;ENST00000339208:LtoL;ENST00000345615:LtoL;ENST00000346661:LtoL;                                                                                                                               | - | CtoA | 0.1    | 0.1    | 2  | 2  | [10,10] |
| chr17:33011775  | AP1GBP1    | coding_exon |                                                                                                                                                                                                                                                              | - | TtoC | 0.1111 | 0.1667 | 4  | 2  | [13,18] |
| chr17:32949975  | AP1GBP1    | UTR3        |                                                                                                                                                                                                                                                              | - | AtoG | 0.1    | 0.1875 | 7  | 5  | [10,16] |
| chr17:32952647  | AP1GBP1    | UTR3        |                                                                                                                                                                                                                                                              | - | CtoT | 0.1    | 0.1    | 2  | 2  | [10,10] |



|                 |           |             |                                                                                     |   |      |        |        |    |    |          |
|-----------------|-----------|-------------|-------------------------------------------------------------------------------------|---|------|--------|--------|----|----|----------|
| chr7:100590958  | AP1S1     | UTR3        |                                                                                     | + | CtoT | 0.1111 | 0.3    | 2  | 2  | [10,36]  |
| chr11:976858    | AP2A2     | coding_exon | ENST00000329626:YtoD;ENST00000332231:YtoD;ENST00000448903:YtoD;ENST00000448903:YtoD | + | TtoG | 0.1    | 0.1818 | 2  | 2  | [10,11]  |
| chr17:31075394  | AP2B1     | UTR3        |                                                                                     | + | TtoC | 0.1    | 0.1111 | 6  | 2  | [18,22]  |
| chr17:31075458  | AP2B1     | UTR3        |                                                                                     | + | CtoA | 0.1    | 0.1    | 3  | 2  | [10,10]  |
| chr19:52033264  | AP2S1     | UTR3        |                                                                                     | - | CtoA | 0.1429 | 0.1579 | 4  | 2  | [15,19]  |
| chr19:52033268  | AP2S1     | UTR3        |                                                                                     | - | CtoA | 0.12   | 0.1875 | 12 | 5  | [17,30]  |
| chr5:77509003   | AP3B1     | coding_exon | ENST00000255194:VtoG;                                                               | - | TtoG | 0.125  | 0.1818 | 2  | 2  | [11,16]  |
| chr5:77460856   | AP3B1     | coding_exon | ENST00000255194:LtoP;                                                               | - | TtoC | 0.1    | 0.1053 | 3  | 2  | [19,20]  |
| chr5:77441922   | AP3B1     | coding_exon |                                                                                     | - | TtoC | 0.1    | 0.2727 | 5  | 4  | [10,20]  |
| chr10:75551850  | AP3M1     | UTR3        |                                                                                     | - | TtoC | 0.1    | 0.1579 | 8  | 3  | [10,22]  |
| chr10:75553142  | AP3M1     | UTR3        |                                                                                     | - | CtoA | 0.1    | 0.1    | 4  | 2  | [10,10]  |
| chr8:42145987   | AP3M2     | UTR3        |                                                                                     | + | TtoC | 0.1111 | 0.1111 | 2  | 2  | [18,27]  |
| chr8:42146835   | AP3M2     | UTR3        |                                                                                     | + | TtoC | 0.1    | 0.2    | 3  | 2  | [10,10]  |
| chr8:42146892   | AP3M2     | UTR3        |                                                                                     | + | TtoC | 0.1053 | 0.2105 | 6  | 2  | [19,19]  |
| chr1:114248856  | AP4B1     | coding_exon | ENST00000256658:YtoH;ENST00000369566:YtoH;ENST00000369567:YtoH;ENST00000369567:YtoH | - | TtoC | 0.1    | 0.1111 | 6  | 2  | [10,18]  |
| chr1:114240599  | AP4B1     | coding_exon |                                                                                     | - | Atog | 0.1    | 0.1    | 3  | 2  | [10,10]  |
| chr12:97651342  | APAF1     | UTR3        |                                                                                     | + | GtoT | 0.1    | 0.2    | 2  | 2  | [10,20]  |
| chr10:26829986  | APBB1P    | coding_exon |                                                                                     | + | Atoc | 0.1111 | 0.1607 | 4  | 3  | [45,56]  |
| chr4:40590110   | APBB2     | coding_exon | ENST00000295974:VtoF;                                                               | - | GtoT | 0.1    | 0.1    | 2  | 2  | [10,10]  |
| chr5:139920168  | APBB3     | mixed       |                                                                                     | - | CtoA | 0.1    | 0.1    | 3  | 2  | [10,10]  |
| chr5:112204309  | APC       | coding_exon | ENST00000257430:StoA;ENST00000395617:StoA;ENST00000457016:StoA;                     | + | TtoG | 0.1    | 0.1    | 2  | 2  | [10,10]  |
| chr3:49695922   | APEH      | UTR3        |                                                                                     | + | TtoA | 0.12   | 0.2353 | 4  | 2  | [18,25]  |
| chr14:19993231  | APEX1     | UTR5        |                                                                                     | + | TtoG | 0.1    | 0.1    | 2  | 2  | [10,10]  |
| chr11:43299573  | API5L1    | coding_exon | ENST00000378852:LtoQ;ENST00000420461:LtoQ;ENST00000455725:LtoQ;                     | + | TtoA | 0.1064 | 0.1538 | 7  | 2  | [13,51]  |
| chr11:34860810  | APIP      | UTR3        |                                                                                     | - | Atog | 0.1429 | 0.1818 | 3  | 2  | [11,14]  |
| chr22:37743743  | APOBEC3D  | coding_exon |                                                                                     | + | Atog | 0.2    | 0.2222 | 2  | 2  | [10,10]  |
| chr22:37743768  | APOBEC3D  | coding_exon |                                                                                     | + | TtoC | 0.1176 | 0.1304 | 3  | 2  | [17,23]  |
| chr22:37743900  | APOBEC3D  | coding_exon |                                                                                     | + | Atoc | 0.1    | 0.3158 | 4  | 3  | [20,56]  |
| chr22:37744310  | APOBEC3D  | coding_exon |                                                                                     | + | Atog | 0.1364 | 0.2727 | 3  | 2  | [22,22]  |
| chr22:37813543  | APOBEC3G  | UTR3        |                                                                                     | + | Atog | 0.1    | 0.1429 | 4  | 2  | [10,14]  |
| chr22:37813668  | APOBEC3G  | UTR3        |                                                                                     | + | TtoA | 0.1818 | 0.1818 | 2  | 2  | [11,12]  |
| chr22:34867591  | APOL3     | coding_exon | ENST00000337769:RtoH;ENST00000349314:RtoH;ENST00000397293:RtoH;ENST00000397293:RtoH | - | GtoA | 0.1    | 0.1    | 2  | 2  | [10,10]  |
| chr22:34867577  | APOL3     | coding_exon | ENST00000337769:NtoD;ENST00000349314:NtoD;ENST00000397293:NtoD;ENST00000397293:NtoD | - | Atog | 0.1    | 0.2    | 2  | 2  | [10,15]  |
| chr22:34385394  | APOL6     | coding_exon |                                                                                     | + | GtoA | 0.1    | 0.1333 | 3  | 2  | [10,15]  |
| chr17:55878791  | APPBP2    | UTR3        |                                                                                     | - | GtoT | 0.1    | 0.1    | 3  | 2  | [10,10]  |
| chr17:55879596  | APPBP2    | UTR3        |                                                                                     | - | TtoA | 0.1    | 0.1    | 3  | 2  | [10,10]  |
| chr9:32963135   | APTX      | UTR3        |                                                                                     | - | TtoC | 0.1176 | 0.1429 | 3  | 2  | [14,17]  |
| chr15:32973226  | AQR       | coding_exon | ENST00000156471:VtoG;                                                               | - | TtoG | 0.1429 | 0.1538 | 4  | 2  | [13,14]  |
| chr15:32950296  | AQR       | coding_exon | ENST00000156471:DtoE;                                                               | - | CtoG | 0.1    | 0.1111 | 3  | 2  | [10,18]  |
| chr11:72073817  | ARAP1     | UTR3        |                                                                                     | - | CtoG | 0.1    | 0.1176 | 6  | 4  | [10,19]  |
| chr11:117976958 | ARCN1     | UTR3        |                                                                                     | + | TtoC | 0.1176 | 0.2143 | 4  | 2  | [14,18]  |
| chr11:117978671 | ARCN1     | UTR3        |                                                                                     | + | TtoC | 0.1143 | 0.1818 | 7  | 3  | [11,35]  |
| chr11:117978720 | ARCN1     | UTR3        |                                                                                     | + | TtoG | 0.1    | 0.1    | 3  | 2  | [10,10]  |
| chr12:47616257  | ARF3      | UTR3        |                                                                                     | - | CtoA | 0.1    | 0.2    | 5  | 2  | [10,10]  |
| chr3:57532350   | ARF4      | UTR3        |                                                                                     | - | TtoC | 0.1579 | 0.1852 | 7  | 2  | [19,27]  |
| chr20:61380728  | ARFGAP1   | coding_exon | ENST00000353546:NtoS;ENST00000370275:NtoS;ENST00000370283:NtoS;                     | + | Atog | 0.1111 | 0.1333 | 3  | 2  | [10,15]  |
| chr20:61386184  | ARFGAP1   | mixed       |                                                                                     | + | TtoA | 0.1    | 0.1    | 2  | 2  | [10,10]  |
| chr20:61389587  | ARFGAP1   | mixed       |                                                                                     | + | GtoA | 0.1    | 0.1333 | 2  | 2  | [10,15]  |
| chr22:41543167  | ARFGAP3   | coding_exon | ENST00000263245:EtoG;ENST00000429508:EtoG;ENST00000437119:EtoG;                     | - | Atog | 0.125  | 0.1579 | 4  | 2  | [16,19]  |
| chr22:41560237  | ARFGAP3   | coding_exon |                                                                                     | - | TtoC | 0.1154 | 0.1429 | 5  | 2  | [14,27]  |
| chr22:41523024  | ARFGAP3   | UTR3        |                                                                                     | - | Atog | 0.1    | 0.1667 | 9  | 2  | [12,32]  |
| chr22:41523452  | ARFGAP3   | UTR3        |                                                                                     | - | TtoA | 0.1111 | 0.1333 | 6  | 2  | [16,18]  |
| chr8:68275285   | ARFGEF1   | coding_exon | ENST00000262215:LtoQ;                                                               | - | TtoA | 0.1    | 0.1364 | 3  | 2  | [10,22]  |
| chr20:47082997  | ARFGEF2   | coding_exon | ENST00000371917:YtoD;                                                               | + | TtoG | 0.1    | 0.1538 | 3  | 3  | [10,18]  |
| chr20:47075362  | ARFGEF2   | coding_exon | ENST00000371917:StoP;                                                               | + | TtoC | 0.1    | 0.1    | 2  | 2  | [10,10]  |
| chr20:47083439  | ARFGEF2   | UTR3        |                                                                                     | + | Atot | 0.1    | 0.1    | 2  | 2  | [10,10]  |
| chr14:67187468  | ARG2      | UTR3        |                                                                                     | + | TtoG | 0.1    | 0.1    | 2  | 2  | [10,10]  |
| chr14:67187662  | ARG2      | UTR3        |                                                                                     | + | Atot | 0.1    | 0.1429 | 4  | 2  | [10,22]  |
| chr13:106009646 | ARGLU1    | coding_exon |                                                                                     | - | TtoC | 0.1111 | 0.1875 | 5  | 3  | [16,18]  |
| chr13:106008186 | ARGLU1    | mixed       |                                                                                     | - | Atog | 0.1111 | 0.1667 | 6  | 2  | [18,18]  |
| chr13:106009155 | ARGLU1    | mixed       |                                                                                     | - | TtoA | 0.1    | 0.1    | 2  | 2  | [10,10]  |
| chr15:30704682  | ARHGAP11A | coding_exon | ENST00000361627:LtoV;                                                               | + | CtoG | 0.1071 | 0.3077 | 9  | 7  | [10,28]  |
| chr15:30695027  | ARHGAP11A | UTR5        |                                                                                     | + | GtoA | 0.1    | 0.2857 | 4  | 2  | [10,14]  |
| chr16:24849983  | ARHGAP17  | mixed       |                                                                                     | - | Atoc | 0.1111 | 0.1538 | 8  | 4  | [13,46]  |
| chr16:24860839  | ARHGAP17  | mixed       |                                                                                     | - | TtoG | 0.1042 | 0.3    | 6  | 2  | [10,49]  |
| chr16:24838316  | ARHGAP17  | UTR3        |                                                                                     | - | CtoT | 0.1053 | 0.2222 | 12 | 4  | [18,28]  |
| chr6:129970760  | ARHGAP18  | coding_exon | ENST00000275189:EtoG;ENST00000368149:EtoG;                                          | - | Atog | 0.1    | 0.1111 | 2  | 2  | [10,10]  |
| chr10:98972366  | ARHGAP19  | UTR3        |                                                                                     | - | Atot | 0.1    | 0.1    | 2  | 2  | [10,10]  |
| chr10:98972972  | ARHGAP19  | UTR3        |                                                                                     | - | TtoC | 0.1111 | 0.1333 | 8  | 2  | [15,27]  |
| chr10:98973151  | ARHGAP19  | UTR3        |                                                                                     | - | Atoc | 0.1    | 0.1    | 2  | 2  | [10,10]  |
| chr5:142573789  | ARHGAP26  | coding_exon | ENST00000274498:CtoR;ENST00000378004:CtoR;                                          | + | TtoC | 0.1    | 0.1176 | 2  | 2  | [10,17]  |
| chr17:77418892  | ARHGDI A  | UTR3        |                                                                                     | - | TtoA | 0.25   | 0.3333 | 2  | 2  | [15,21]  |
| chr12:14986217  | ARHGDI B  | UTR3        |                                                                                     | - | GtoA | 0.1    | 0.2    | 2  | 2  | [10,10]  |
| chr12:14986220  | ARHGDI B  | UTR3        |                                                                                     | - | TtoG | 0.1148 | 0.2353 | 2  | 2  | [17,64]  |
| chr12:14986230  | ARHGDI B  | UTR3        |                                                                                     | - | GtoA | 0.102  | 0.1613 | 13 | 6  | [14,53]  |
| chr12:14986231  | ARHGDI B  | UTR3        |                                                                                     | - | TtoA | 0.1053 | 0.3333 | 19 | 17 | [19,191] |
| chr19:47084679  | ARHGEF1   | mixed       |                                                                                     | + | Atoc | 0.1081 | 0.1463 | 7  | 3  | [35,74]  |
| chr19:47103405  | ARHGEF1   | mixed       |                                                                                     | + | Atog | 0.1    | 0.125  | 2  | 2  | [10,16]  |
| chr11:119851422 | ARHGEF12  | coding_exon |                                                                                     | + | Atog | 0.1    | 0.1667 | 3  | 2  | [10,12]  |
| chr11:119856162 | ARHGEF12  | coding_exon |                                                                                     | + | Atog | 0.1667 | 0.1667 | 3  | 2  | [12,12]  |
| chr19:7440859   | ARHGEF18  | coding_exon | ENST00000319670:NtoT;ENST00000359920:NtoT;ENST00000398026:NtoT;                     | + | Atoc | 0.125  | 0.25   | 4  | 3  | [16,24]  |
| chr19:7427264   | ARHGEF18  | coding_exon | ENST00000319670:DtoG;ENST00000359920:DtoG;ENST00000398026:DtoG;                     | + | Atog | 0.1    | 0.1    | 3  | 2  | [10,10]  |
| chr1:154201546  | ARHGEF2   | coding_exon | ENST00000361247:Atog;ENST00000368315:Atog;ENST00000435736:Atog;                     | - | CtoA | 0.1    | 0.1667 | 11 | 3  | [20,54]  |
| chr1:154188626  | ARHGEF2   | coding_exon | ENST00000313667:VtoA;ENST00000313695:VtoA;ENST00000361247:VtoA;ENST00000361247:VtoA | - | TtoC | 0.1034 | 0.1429 | 3  | 2  | [15,29]  |
| chr1:154184115  | ARHGEF2   | UTR3        |                                                                                     | - | Atog | 0.1429 | 0.3333 | 11 | 4  | [12,21]  |
| chr3:56738394   | ARHGEF3   | coding_exon | ENST00000296315:MtoV;ENST00000338458:MtoV;ENST00000413728:MtoV;ENST00000413728:MtoV | - | Atog | 0.1    | 0.1111 | 3  | 2  | [10,10]  |
| chr3:56738480   | ARHGEF3   | coding_exon | ENST00000296315:EtoG;ENST00000338458:EtoG;ENST00000413728:EtoG;ENST00000413728:EtoG | - | Atog | 0.1    | 0.1    | 5  | 2  | [10,10]  |
| chr3:56736616   | ARHGEF3   | UTR3        |                                                                                     | - | GtoA | 0.1    | 0.1    | 2  | 2  | [10,10]  |
| chr13:110753996 | ARHGEF7   | UTR3        |                                                                                     | + | TtoC | 0.1    | 0.1    | 3  | 2  | [10,11]  |
| chr1:26971890   | ARID1A    | coding_exon | ENST00000324856:StoR;ENST00000374152:StoR;ENST00000457599:StoR;                     | + | CtoG | 0.1053 | 0.3333 | 12 | 9  | [10,32]  |
| chr1:26978259   | ARID1A    | coding_exon |                                                                                     | + | TtoC | 0.1    | 0.1333 | 8  | 2  | [15,30]  |
| chr1:26980160   | ARID1A    | UTR3        |                                                                                     | + | GtoA | 0.1    | 0.1429 | 9  | 4  | [10,21]  |
| chr1:26980537   | ARID1A    | UTR3        |                                                                                     | + | GtoA | 0.1111 | 0.2143 | 7  | 3  | [13,18]  |
| chr1:26980925   | ARID1A    | UTR3        |                                                                                     | + | TtoA | 0.1    | 0.2    | 9  | 3  | [10,12]  |
| chr12:44531788  | ARID2A    | coding_exon |                                                                                     | + | Atog | 0.1    | 0.1    | 2  | 2  | [10,10]  |
| chr19:923198    | ARID3A    | UTR3        |                                                                                     | + | TtoA | 0.125  | 0.1538 | 4  | 2  | [13,24]  |

|                 |         |             |                                                                                         |   |      |        |        |    |    |         |
|-----------------|---------|-------------|-----------------------------------------------------------------------------------------|---|------|--------|--------|----|----|---------|
| chr14:57897423  | ARID4A  | coding_exon | ENST00000348476:StoA;ENST00000355431:StoA;ENST00000395168:StoA;ENST00000395168:StoA     | + | TtoG | 0.1    | 0.125  | 2  | 2  | [10,16] |
| chr1:233412689  | ARID4B  | coding_exon | ENST00000264183:RtoI;ENST00000349213:RtoI;ENST00000366603:RtoI;ENST00000366603:RtoI     | - | GtoT | 0.1053 | 0.125  | 2  | 2  | [16,19] |
| chr1:233405275  | ARID4B  | coding_exon | ENST00000264183:KtoQ;ENST00000349213:KtoQ;ENST00000366603:KtoQ;ENST00000366603:KtoQ     | - | AtoC | 0.1    | 0.1429 | 2  | 2  | [10,14] |
| chr1:233443951  | ARID4B  | coding_exon | ENST00000264183:KtoE;ENST00000366603:KtoE;ENST00000391856:KtoE;                         | - | AtoG | 0.1    | 0.1053 | 2  | 2  | [10,19] |
| chr1:233405234  | ARID4B  | coding_exon |                                                                                         | - | TtoC | 0.1    | 0.1053 | 5  | 2  | [10,19] |
| chr15:70665406  | ARIH1   | UTR3        |                                                                                         | + | AtoG | 0.1    | 0.1    | 2  | 2  | [10,10] |
| chr3:48940233   | ARIH2   | coding_exon | ENST00000356401:LtoV;ENST00000444790:LtoV;ENST00000449376:LtoV;                         | + | TtoG | 0.1    | 0.15   | 6  | 2  | [10,20] |
| chr12:100320831 | ARL1    | coding_exon | ENST00000261636:VtoA;                                                                   | - | TtoC | 0.1053 | 0.1364 | 7  | 3  | [19,37] |
| chr16:55840014  | ARL2BP  | coding_exon |                                                                                         | + | AtoG | 0.2    | 0.2857 | 2  | 2  | [10,14] |
| chr16:55844933  | ARL2BP  | UTR3        |                                                                                         | + | TtoC | 0.1    | 0.1538 | 3  | 2  | [10,13] |
| chr10:104426489 | ARL3    | UTR3        |                                                                                         | - | TtoA | 0.1    | 0.1667 | 5  | 3  | [10,14] |
| chr12:122033401 | ARL6IP4 | UTR3        |                                                                                         | + | TtoG | 0.1667 | 0.2308 | 8  | 3  | [13,23] |
| chr3:69237880   | ARL6IP5 | UTR3        |                                                                                         | + | AtoG | 0.1111 | 0.2    | 9  | 2  | [10,18] |
| chr16:31385630  | ARMC5   | mixed       |                                                                                         | + | AtoG | 0.1    | 0.1    | 3  | 2  | [10,10] |
| chr16:31385939  | ARMC5   | UTR3        |                                                                                         | + | TtoC | 0.1    | 0.1    | 2  | 2  | [10,10] |
| chr19:19026082  | ARMC6   | coding_exon |                                                                                         | + | CtoG | 1      | 1      | 15 | 15 | [10,64] |
| chr19:19029508  | ARMC6   | UTR3        |                                                                                         | + | TtoC | 0.1    | 0.1053 | 3  | 2  | [19,30] |
| chr17:70636367  | ARMC7   | coding_exon | ENST00000245543:GtoA;                                                                   | + | GtoC | 0.1    | 0.1333 | 6  | 4  | [10,15] |
| chr17:70637040  | ARMC7   | UTR3        |                                                                                         | + | CtoA | 0.1    | 0.1    | 2  | 2  | [10,10] |
| chr3:139486039  | ARMC8   | coding_exon | ENST00000393058:QtoP;ENST00000461822:QtoP;ENST00000469044:QtoP;ENST00000469044:QtoP     | + | AtoC | 0.1    | 0.1    | 2  | 2  | [10,10] |
| chr3:139439014  | ARMC8   | coding_exon | ENST00000358441:VtoG;ENST00000393058:VtoG;ENST00000461822:VtoG;ENST00000461822:VtoG     | + | TtoG | 0.1    | 0.1818 | 2  | 2  | [10,11] |
| chr3:139423501  | ARMC8   | coding_exon | ENST00000358441:NtoD;ENST00000393058:NtoD;ENST00000461822:NtoD;ENST00000461822:NtoD     | + | AtoG | 0.1    | 0.1429 | 3  | 2  | [10,14] |
| chr3:139446912  | ARMC8   | mixed       |                                                                                         | + | AtoG | 0.1    | 0.1    | 2  | 2  | [10,10] |
| chr3:139497809  | ARMC8   | UTR3        |                                                                                         | + | TtoC | 0.1    | 0.1667 | 2  | 2  | [10,12] |
| chr3:51401781   | ARMET   | UTR3        |                                                                                         | + | AtoG | 0.2    | 0.25   | 3  | 2  | [10,12] |
| chr1:149075523  | ARNT    | coding_exon | ENST00000322733:VtoG;ENST00000342710:VtoG;ENST00000354396:VtoG;ENST00000354396:VtoG     | - | TtoG | 0.1    | 0.1053 | 4  | 2  | [10,19] |
| chr1:149075461  | ARNT    | coding_exon | ENST00000322733:StoC;ENST00000342710:StoC;ENST00000354396:StoC;ENST00000354396:StoC     | - | AtoT | 0.1    | 0.1176 | 2  | 2  | [10,17] |
| chr7:98784468   | ARPC1B  | coding_exon | ENST00000432884:WtoC;                                                                   | + | GtoC | 0.1154 | 0.3333 | 3  | 2  | [18,26] |
| chr7:98789469   | ARPC1B  | coding_exon | ENST00000432884:VtoL;                                                                   | + | GtoC | 0.1    | 0.4444 | 4  | 3  | [10,18] |
| chr7:98784478   | ARPC1B  | coding_exon | ENST00000432884:NtoD;                                                                   | + | AtoG | 0.1538 | 0.3571 | 5  | 2  | [13,14] |
| chr7:98780037   | ARPC1B  | coding_exon | ENST00000432884:LtoF;                                                                   | + | CtoT | 0.1765 | 0.2    | 3  | 3  | [10,17] |
| chr2:218827290  | ARPC2   | UTR3        |                                                                                         | + | AtoG | 0.1667 | 0.4615 | 8  | 8  | [10,17] |
| chr12:109357131 | ARPC3   | UTR3        |                                                                                         | - | CtoG | 0.1    | 0.1818 | 10 | 5  | [19,33] |
| chr12:109357132 | ARPC3   | UTR3        |                                                                                         | - | GtoA | 0.1053 | 0.1538 | 9  | 2  | [38,39] |
| chr9:126679503  | ARPC5L  | UTR3        |                                                                                         | + | TtoA | 0.1    | 0.1667 | 7  | 3  | [10,19] |
| chr15:50636710  | ARPP19  | coding_exon | ENST00000249822:EtoG;                                                                   | - | AtoG | 0.12   | 0.1429 | 3  | 2  | [21,26] |
| chr17:4565085   | ARRB2   | coding_exon | ENST00000269260:KtoQ;ENST00000346341:KtoQ;ENST00000381488:KtoQ;ENST00000381488:KtoQ     | + | AtoC | 0.1304 | 0.1429 | 5  | 2  | [14,23] |
| chr9:139629514  | ARRDC1  | UTR3        |                                                                                         | + | TtoC | 0.1    | 0.1364 | 2  | 2  | [10,22] |
| chr19:17982006  | ARRDC2  | coding_exon | ENST00000222250:VtoA;ENST00000379656:VtoA;                                              | + | TtoC | 0.1    | 0.1    | 2  | 2  | [10,10] |
| chr22:49410875  | ARSA    | coding_exon | ENST00000216124:QtoP;ENST00000356098:QtoP;ENST00000395619:QtoP;ENST00000395619:QtoP     | - | AtoC | 0.1304 | 0.1538 | 3  | 2  | [13,23] |
| chr22:49413209  | ARSA    | UTR5        |                                                                                         | - | GtoC | 1      | 1      | 3  | 3  | [11,12] |
| chr1:229202821  | ARV1    | UTR3        |                                                                                         | + | TtoG | 0.125  | 0.1333 | 6  | 2  | [16,17] |
| chr1:229202823  | ARV1    | UTR3        |                                                                                         | + | AtoG | 0.1333 | 0.2    | 3  | 3  | [14,15] |
| chr8:17965017   | ASAH1   | coding_exon | ENST00000262097:HtoN;ENST00000314146:HtoN;ENST00000381733:HtoN;ENST00000381733:HtoN     | - | CtoA | 0.1    | 0.1333 | 3  | 2  | [10,15] |
| chr2:239019865  | ASB1    | coding_exon | ENST00000264607:IttoV;ENST00000409297:IttoV;                                            | + | AtoG | 0.1    | 0.1    | 3  | 2  | [10,10] |
| chr2:239024055  | ASB1    | UTR3        |                                                                                         | + | AtoG | 0.1    | 0.1    | 2  | 2  | [10,10] |
| chr3:57280894   | ASB14   | UTR3        |                                                                                         | - | AtoG | 0.1    | 0.1    | 2  | 2  | [10,10] |
| chr2:53878200   | ASB3    | coding_exon |                                                                                         | - | AtoG | 0.1    | 0.125  | 6  | 2  | [10,16] |
| chr12:46828269  | ASB8    | UTR3        |                                                                                         | - | TtoA | 0.1    | 0.1333 | 3  | 2  | [10,15] |
| chr12:46828701  | ASB8    | UTR3        |                                                                                         | - | AtoT | 0.1    | 0.1667 | 2  | 2  | [10,12] |
| chr12:46829191  | ASB8    | UTR3        |                                                                                         | - | TtoG | 0.1    | 0.125  | 3  | 2  | [10,16] |
| chr12:46829361  | ASB8    | UTR3        |                                                                                         | - | CtoA | 0.1    | 0.1053 | 3  | 2  | [10,19] |
| chr10:73557857  | ASCC1   | coding_exon | ENST00000317126:NtoD;ENST00000317168:NtoD;ENST00000342444:NtoD;ENST00000342444:NtoD     | - | AtoG | 0.1176 | 0.1818 | 4  | 2  | [11,17] |
| chr22:28560482  | ASCC2   | UTR5        |                                                                                         | - | AtoG | 0.1    | 0.1429 | 5  | 2  | [10,14] |
| chr6:101197188  | ASCC3   | coding_exon |                                                                                         | - | TtoC | 0.1    | 0.1    | 5  | 2  | [10,10] |
| chr6:101063518  | ASCC3   | UTR3        |                                                                                         | - | AtoG | 0.1    | 0.1    | 2  | 2  | [10,10] |
| chr19:14092256  | ASF1B   | UTR3        |                                                                                         | - | AtoG | 0.5    | 0.6522 | 3  | 3  | [23,51] |
| chr1:153582882  | ASH1L   | coding_exon |                                                                                         | - | AtoG | 0.1    | 0.1364 | 3  | 3  | [10,22] |
| chr8:38115783   | ASH2L   | UTR3        |                                                                                         | + | TtoA | 0.1    | 0.1    | 2  | 2  | [10,10] |
| chr8:38116351   | ASH2L   | UTR3        |                                                                                         | + | TtoC | 0.1    | 0.2    | 2  | 2  | [10,10] |
| chr7:65195375   | ASL     | UTR3        |                                                                                         | + | GtoA | 0.1429 | 0.2    | 4  | 2  | [10,14] |
| chr7:65195377   | ASL     | UTR3        |                                                                                         | + | GtoA | 0.1667 | 0.5455 | 6  | 4  | [11,13] |
| chr2:190243625  | ASNSD1  | coding_exon |                                                                                         | + | AtoG | 0.1    | 0.2    | 4  | 2  | [10,10] |
| chr2:190243646  | ASNSD1  | coding_exon |                                                                                         | + | CtoG | 0.1    | 0.1429 | 3  | 2  | [10,14] |
| chr22:25160141  | ASPHD2  | coding_exon | ENST00000215906:DtoV;ENST00000382701:DtoV;ENST00000456021:DtoV;                         | + | AtoT | 0.1    | 0.1    | 2  | 2  | [10,10] |
| chr1:195320137  | ASPM    | coding_exon |                                                                                         | - | AtoG | 0.1053 | 0.1818 | 3  | 2  | [11,19] |
| chr1:195358268  | ASPM    | coding_exon |                                                                                         | - | AtoG | 0.1    | 0.1176 | 3  | 2  | [10,18] |
| chr9:132345640  | ASS1    | coding_exon | ENST00000334909:IttoT;ENST00000352480:IttoT;ENST00000372393:IttoT;ENST00000372393:IttoT | + | TtoC | 0.1429 | 0.3571 | 4  | 2  | [14,14] |
| chr9:132366234  | ASS1    | UTR3        |                                                                                         | + | GtoC | 0.1667 | 0.5333 | 4  | 2  | [12,15] |
| chr9:132366253  | ASS1    | UTR3        |                                                                                         | + | GtoA | 0.1    | 0.6154 | 2  | 2  | [10,13] |
| chr9:132366326  | ASS1    | UTR3        |                                                                                         | + | CtoT | 0.4167 | 0.7273 | 2  | 2  | [11,12] |
| chr20:30488363  | ASXL1   | coding_exon | ENST00000306058:VtoA;ENST00000358956:VtoA;ENST00000375687:VtoA;ENST00000375687:VtoA     | + | TtoC | 0.1    | 0.1    | 2  | 2  | [21,21] |
| chr20:30480891  | ASXL1   | coding_exon |                                                                                         | + | AtoT | 0.125  | 0.1667 | 7  | 2  | [12,24] |
| chr20:30488815  | ASXL1   | UTR3        |                                                                                         | + | AtoG | 0.1579 | 0.1818 | 6  | 2  | [11,19] |
| chr20:30490412  | ASXL1   | UTR3        |                                                                                         | + | AtoG | 0.1    | 0.1    | 2  | 2  | [10,10] |
| chr20:30490637  | ASXL1   | UTR3        |                                                                                         | + | TtoC | 0.1    | 0.1    | 2  | 2  | [10,10] |
| chr10:89567551  | ATAD1   | UTR5        |                                                                                         | - | AtoG | 0.1    | 0.1    | 2  | 2  | [10,10] |
| chr12:49500083  | ATF1    | UTR3        |                                                                                         | + | TtoA | 0.1    | 0.1429 | 2  | 2  | [10,14] |
| chr2:175645873  | ATF2    | UTR3        |                                                                                         | - | AtoG | 0.1    | 0.1    | 3  | 2  | [10,10] |
| chr2:175646325  | ATF2    | UTR3        |                                                                                         | - | TtoG | 0.1    | 0.125  | 5  | 3  | [10,16] |
| chr1:160195348  | ATF6    | UTR3        |                                                                                         | + | AtoC | 0.1    | 0.1053 | 2  | 2  | [10,19] |
| chr1:160200268  | ATF6    | UTR3        |                                                                                         | + | TtoC | 0.1    | 0.1    | 2  | 2  | [10,10] |
| chr1:160200272  | ATF6    | UTR3        |                                                                                         | + | AtoG | 0.1053 | 0.15   | 3  | 2  | [19,20] |
| chr12:52193229  | ATF7    | UTR3        |                                                                                         | - | AtoG | 0.1176 | 0.125  | 3  | 2  | [16,17] |
| chr12:52193817  | ATF7    | UTR3        |                                                                                         | - | TtoG | 0.1    | 0.1    | 2  | 2  | [10,10] |
| chr12:14525246  | ATF7IP  | coding_exon | ENST00000261168:VtoA;                                                                   | + | TtoC | 0.1176 | 0.125  | 2  | 2  | [16,17] |
| chr12:14542277  | ATF7IP  | UTR3        |                                                                                         | + | CtoA | 0.1    | 0.1    | 3  | 2  | [10,10] |
| chr5:115195166  | ATG12   | UTR3        |                                                                                         | - | TtoC | 0.1304 | 0.1538 | 2  | 2  | [13,23] |
| chr2:233867861  | ATG16L1 | UTR3        |                                                                                         | + | GtoT | 0.1    | 0.1429 | 2  | 2  | [10,14] |
| chr11:72211616  | ATG16L2 | mixed       |                                                                                         | + | GtoA | 0.1    | 0.1176 | 2  | 2  | [10,17] |
| chr11:64422752  | ATG2A   | coding_exon | ENST00000377264:StoP;ENST00000421419:StoP;                                              | - | TtoC | 0.1    | 0.1    | 2  | 2  | [10,10] |
| chr11:64420533  | ATG2A   | coding_exon | ENST00000377262:NtoD;ENST00000377264:NtoD;ENST00000421419:NtoD;                         | - | AtoG | 0.1    | 0.1    | 2  | 2  | [10,20] |
| chr1:63057272   | ATG4C   | coding_exon | ENST00000317868:WtoR;ENST00000371120:WtoR;                                              | + | TtoC | 0.1    | 0.1429 | 6  | 2  | [10,14] |
| chr3:11572622   | ATG7    | UTR3        |                                                                                         | + | CtoT | 0.1    | 0.1111 | 3  | 2  | [10,18] |
| chr2:219795120  | ATG9A   | coding_exon | ENST00000361242:TtoP;ENST00000396761:TtoP;ENST00000409422:TtoP;ENST00000409422:TtoP     | - | AtoC | 0.1    | 0.1667 | 3  | 2  | [10,12] |
| chr2:219793854  | ATG9A   | coding_exon |                                                                                         | - | TtoC | 0.1    | 0.125  | 3  | 2  | [16,20] |

|                 |          |             |                                                                                                                                                                                                                                                                                                                             |   |      |        |        |    |    |           |
|-----------------|----------|-------------|-----------------------------------------------------------------------------------------------------------------------------------------------------------------------------------------------------------------------------------------------------------------------------------------------------------------------------|---|------|--------|--------|----|----|-----------|
| chr11:284418    | ATHL1    | coding_exon | ENST00000312105:WtoR;ENST00000409479:WtoR;ENST00000409548:WtoR;ENST00000312105:KtoR;ENST00000382625:KtoR;ENST00000409479:KtoR;ENST00000312105:GtoR;ENST00000382625:GtoR;ENST00000409479:GtoR;ENST00000409548:GtoR                                                                                                           | + | TtoC | 0.1    | 0.1111 | 2  | 2  | [10,19]   |
| chr11:282983    | ATHL1    | coding_exon | ENST00000312105:WtoR;ENST00000409479:WtoR;ENST00000409548:WtoR;ENST00000312105:KtoR;ENST00000382625:KtoR;ENST00000409479:KtoR;ENST00000312105:GtoR;ENST00000382625:GtoR;ENST00000409479:GtoR;ENST00000409548:GtoR                                                                                                           | + | AtoG | 0.1    | 0.25   | 3  | 2  | [10,17]   |
| chr2:215922689  | ATIC     | UTR3        |                                                                                                                                                                                                                                                                                                                             | + | GtoA | 0.15   | 0.2857 | 7  | 2  | [14,20]   |
| chr2:215922691  | ATIC     | UTR3        |                                                                                                                                                                                                                                                                                                                             | + | TtoA | 0.1111 | 0.1875 | 7  | 3  | [17,36]   |
| chr2:38376731   | ATL2     | mixed       |                                                                                                                                                                                                                                                                                                                             | - | TtoC | 0.1    | 0.1    | 2  | 2  | [10,10]   |
| chr2:38375800   | ATL2     | UTR3        |                                                                                                                                                                                                                                                                                                                             | - | GtoT | 0.1    | 0.1053 | 3  | 2  | [10,19]   |
| chr2:38375890   | ATL2     | UTR3        |                                                                                                                                                                                                                                                                                                                             | - | TtoC | 0.1    | 0.1    | 3  | 2  | [10,10]   |
| chr11:63160279  | ATL3     | coding_exon |                                                                                                                                                                                                                                                                                                                             | - | TtoC | 0.1    | 0.1053 | 2  | 2  | [10,19]   |
| chr11:107744907 | ATM      | UTR3        |                                                                                                                                                                                                                                                                                                                             | + | AtoG | 0.1    | 0.1333 | 2  | 2  | [10,15]   |
| chr16:79632524  | ATMIN    | coding_exon |                                                                                                                                                                                                                                                                                                                             | + | TtoC | 0.1    | 0.1    | 2  | 2  | [10,10]   |
| chr12:6913617   | ATN1     | coding_exon |                                                                                                                                                                                                                                                                                                                             | + | AtoC | 0.1111 | 0.1667 | 3  | 2  | [12,27]   |
| chr12:6921558   | ATN1     | UTR3        |                                                                                                                                                                                                                                                                                                                             | + | TtoG | 0.1    | 0.2727 | 5  | 3  | [22,30]   |
| chr5:151102585  | ATOX1    | UTR3        |                                                                                                                                                                                                                                                                                                                             | - | TtoA | 0.1    | 0.3333 | 4  | 4  | [10,12]   |
| chr5:151102588  | ATOX1    | UTR3        |                                                                                                                                                                                                                                                                                                                             | - | TtoC | 0.1    | 0.1818 | 3  | 2  | [12,20]   |
| chr13:112587555 | ATP11A   | UTR3        |                                                                                                                                                                                                                                                                                                                             | + | AtoG | 0.1429 | 0.1818 | 3  | 2  | [11,14]   |
| chr3:184119240  | ATP11B   | UTR3        |                                                                                                                                                                                                                                                                                                                             | + | TtoA | 0.1    | 0.1538 | 2  | 2  | [10,13]   |
| chr19:19619449  | ATP13A1  | coding_exon | ENST00000291503:StoP;ENST00000357324:StoP;                                                                                                                                                                                                                                                                                  | - | TtoC | 0.1    | 0.1176 | 6  | 3  | [10,18]   |
| chr19:19617490  | ATP13A1  | coding_exon | ENST00000291503:NtoT;ENST00000357324:NtoT;                                                                                                                                                                                                                                                                                  | - | AtoC | 0.1081 | 0.15   | 3  | 3  | [14,37]   |
| chr3:195639482  | ATP13A3  | coding_exon | ENST00000256031:AtoT;ENST00000310773:AtoT;ENST00000439040:AtoT;                                                                                                                                                                                                                                                             | - | GtoA | 0.1    | 0.1    | 2  | 2  | [10,10]   |
| chr3:195639481  | ATP13A3  | coding_exon | ENST00000256031:AtoD;ENST00000310773:AtoD;ENST00000439040:AtoD;                                                                                                                                                                                                                                                             | - | CtoA | 0.1    | 0.1    | 2  | 2  | [10,10]   |
| chr3:195605188  | ATP13A3  | UTR3        |                                                                                                                                                                                                                                                                                                                             | - | TtoA | 0.1    | 0.3    | 2  | 2  | [10,10]   |
| chr1:167363146  | ATP1B1   | coding_exon | ENST00000367813:VtoA;ENST00000367815:VtoA;ENST00000367816:VtoA;                                                                                                                                                                                                                                                             | + | TtoC | 0.1176 | 0.1429 | 3  | 2  | [14,17]   |
| chr12:109267075 | ATP2A2   | coding_exon | ENST00000308664:CtoW;ENST00000313432:CtoW;ENST00000395494:CtoW;                                                                                                                                                                                                                                                             | + | TtoG | 0.1163 | 0.2933 | 6  | 2  | [43,75]   |
| chr12:109269372 | ATP2A2   | mixed       |                                                                                                                                                                                                                                                                                                                             | + | TtoA | 0.1111 | 0.1667 | 7  | 2  | [12,18]   |
| chr12:109272801 | ATP2A2   | UTR3        |                                                                                                                                                                                                                                                                                                                             | + | CtoG | 0.1    | 0.125  | 2  | 2  | [10,16]   |
| chr12:109272888 | ATP2A2   | UTR3        |                                                                                                                                                                                                                                                                                                                             | + | TtoC | 0.1    | 0.1    | 3  | 2  | [10,10]   |
| chr17:3773921   | ATP2A3   | UTR3        |                                                                                                                                                                                                                                                                                                                             | - | GtoA | 0.1    | 0.1818 | 9  | 5  | [10,20]   |
| chr17:3773923   | ATP2A3   | UTR3        |                                                                                                                                                                                                                                                                                                                             | - | TtoC | 0.1111 | 0.2632 | 15 | 7  | [14,44]   |
| chr12:88542149  | ATP2B1   | coding_exon | ENST00000261173:VtoA;ENST00000348959:VtoA;ENST00000359142:VtoA;ENST00000261173:GtoR;ENST00000348959:GtoR;ENST00000359142:GtoR;ENST00000261173:KtoR;ENST00000348959:KtoR;ENST00000359142:KtoR;ENST00000261173:GtoT;ENST00000348959:GtoT;ENST00000359142:GtoT;ENST00000261173:KtoT;ENST00000348959:KtoT;ENST00000359142:KtoT; | - | TtoC | 0.1333 | 0.1538 | 6  | 2  | [13,15]   |
| chr12:88537970  | ATP2B1   | coding_exon | ENST00000261173:VtoA;ENST00000348959:VtoA;ENST00000359142:VtoA;ENST00000261173:GtoR;ENST00000348959:GtoR;ENST00000359142:GtoR;ENST00000261173:KtoR;ENST00000348959:KtoR;ENST00000359142:KtoR;ENST00000261173:GtoT;ENST00000348959:GtoT;ENST00000359142:GtoT;ENST00000261173:KtoT;ENST00000348959:KtoT;ENST00000359142:KtoT; | - | TtoG | 0.1    | 0.1429 | 3  | 2  | [10,14]   |
| chr12:88538023  | ATP2B1   | coding_exon | ENST00000261173:VtoA;ENST00000348959:VtoA;ENST00000359142:VtoA;ENST00000261173:GtoR;ENST00000348959:GtoR;ENST00000359142:GtoR;ENST00000261173:KtoR;ENST00000348959:KtoR;ENST00000359142:KtoR;ENST00000261173:GtoT;ENST00000348959:GtoT;ENST00000359142:GtoT;ENST00000261173:KtoT;ENST00000348959:KtoT;ENST00000359142:KtoT; | - | AtoG | 0.1429 | 0.1667 | 2  | 2  | [12,14]   |
| chr12:88542103  | ATP2B1   | coding_exon | ENST00000261173:VtoA;ENST00000348959:VtoA;ENST00000359142:VtoA;ENST00000261173:GtoR;ENST00000348959:GtoR;ENST00000359142:GtoR;ENST00000261173:KtoR;ENST00000348959:KtoR;ENST00000359142:KtoR;ENST00000261173:GtoT;ENST00000348959:GtoT;ENST00000359142:GtoT;ENST00000261173:KtoT;ENST00000348959:KtoT;ENST00000359142:KtoT; | - | TtoA | 0.1    | 0.1    | 3  | 2  | [10,10]   |
| chr12:88508919  | ATP2B1   | mixed       |                                                                                                                                                                                                                                                                                                                             | - | AtoG | 0.1    | 0.1538 | 5  | 3  | [10,13]   |
| chr3:132217680  | ATP2C1   | coding_exon |                                                                                                                                                                                                                                                                                                                             | + | AtoG | 0.1    | 0.1    | 2  | 2  | [10,10]   |
| chr3:132203407  | ATP2C1   | mixed       |                                                                                                                                                                                                                                                                                                                             | + | TtoG | 0.1    | 0.125  | 6  | 2  | [10,16]   |
| chr18:41918111  | ATP5A1   | UTR3        |                                                                                                                                                                                                                                                                                                                             | - | AtoG | 0.1818 | 0.3636 | 4  | 4  | [10,13]   |
| chr19:1195818   | ATP5D    | UTR3        |                                                                                                                                                                                                                                                                                                                             | + | AtoG | 0.1053 | 0.1304 | 9  | 4  | [16,24]   |
| chr20:57038877  | ATP5E    | coding_exon | ENST00000243997:YtoS;ENST00000395659:YtoS;ENST00000395663:YtoS;                                                                                                                                                                                                                                                             | - | AtoC | 0.1    | 0.2727 | 3  | 2  | [11,31]   |
| chr20:57040692  | ATP5E    | coding_exon | ENST00000243997:YtoN;ENST00000395659:YtoN;ENST00000395663:YtoN;                                                                                                                                                                                                                                                             | - | TtoA | 0.1562 | 0.2    | 7  | 3  | [10,58]   |
| chr20:57038875  | ATP5E    | coding_exon | ENST00000243997:ItoL;ENST00000395659:ItoL;ENST00000395663:ItoL;                                                                                                                                                                                                                                                             | - | AtoC | 0.1042 | 0.1818 | 4  | 2  | [22,49]   |
| chr20:57038756  | ATP5E    | coding_exon | ENST00000243997:*toY;ENST00000395659:*toY;ENST00000395663:*toY;                                                                                                                                                                                                                                                             | - | AtoT | 0.1163 | 0.2027 | 6  | 4  | [45,116]  |
| chr20:57038876  | ATP5E    | coding_exon | ENST00000243997:*toY;ENST00000395659:*toY;ENST00000395663:*toY;                                                                                                                                                                                                                                                             | - | CtoT | 0.2    | 0.3    | 6  | 3  | [15,45]   |
| chr20:57037228  | ATP5E    | UTR3        |                                                                                                                                                                                                                                                                                                                             | - | AtoG | 0.1071 | 0.1316 | 6  | 2  | [28,38]   |
| chr20:57037238  | ATP5E    | UTR3        |                                                                                                                                                                                                                                                                                                                             | - | AtoG | 0.1094 | 0.125  | 12 | 2  | [56,64]   |
| chr20:57037240  | ATP5E    | UTR3        |                                                                                                                                                                                                                                                                                                                             | - | AtoG | 0.119  | 0.2987 | 16 | 15 | [31,101]  |
| chr20:57037290  | ATP5E    | UTR3        |                                                                                                                                                                                                                                                                                                                             | - | CtoT | 0.1    | 0.1    | 4  | 2  | [50,90]   |
| chr17:44328138  | ATP5G1   | UTR3        |                                                                                                                                                                                                                                                                                                                             | + | TtoA | 0.1429 | 0.2    | 4  | 2  | [10,14]   |
| chr17:44328146  | ATP5G1   | UTR3        |                                                                                                                                                                                                                                                                                                                             | + | TtoC | 0.1    | 0.1875 | 6  | 3  | [10,20]   |
| chr12:52345243  | ATP5G2   | UTR3        |                                                                                                                                                                                                                                                                                                                             | - | AtoG | 0.1    | 0.1273 | 7  | 2  | [56,60]   |
| chr2:175751142  | ATP5G3   | UTR3        |                                                                                                                                                                                                                                                                                                                             | - | AtoG | 0.1    | 0.2    | 7  | 3  | [10,19]   |
| chr2:175751143  | ATP5G3   | UTR3        |                                                                                                                                                                                                                                                                                                                             | - | CtoG | 0.1    | 0.2143 | 9  | 4  | [11,18]   |
| chr2:175751145  | ATP5G3   | UTR3        |                                                                                                                                                                                                                                                                                                                             | - | GtoA | 0.1    | 0.1053 | 5  | 2  | [19,20]   |
| chr2:17575196   | ATP5G3   | UTR5        |                                                                                                                                                                                                                                                                                                                             | - | TtoC | 0.8333 | 1      | 5  | 5  | [10,26]   |
| chr17:70546578  | ATP5H    | UTR3        |                                                                                                                                                                                                                                                                                                                             | - | TtoC | 0.1087 | 0.35   | 17 | 10 | [13,46]   |
| chr4:656234     | ATP5I    | UTR3        |                                                                                                                                                                                                                                                                                                                             | - | TtoA | 0.1176 | 0.2727 | 7  | 3  | [11,17]   |
| chr21:26018729  | ATP5J    | mixed       |                                                                                                                                                                                                                                                                                                                             | - | AtoG | 0.1    | 0.1429 | 6  | 2  | [10,14]   |
| chr7:98894811   | ATP5J2   | coding_exon | ENST00000292475:YtoH;ENST00000394186:YtoH;ENST00000449683:YtoH;                                                                                                                                                                                                                                                             | - | TtoC | 0.1034 | 0.114  | 7  | 2  | [119,152] |
| chr7:98893754   | ATP5J2   | UTR3        |                                                                                                                                                                                                                                                                                                                             | - | AtoG | 0.1739 | 0.1905 | 5  | 2  | [23,24]   |
| chr7:98901713   | ATP5J2   | UTR5        |                                                                                                                                                                                                                                                                                                                             | - | CtoT | 0.1143 | 0.1463 | 5  | 2  | [35,41]   |
| chr21:34197634  | ATP5O    | UTR3        |                                                                                                                                                                                                                                                                                                                             | - | AtoG | 0.1    | 0.2    | 4  | 3  | [10,10]   |
| chr19:46629493  | ATP5L    | UTR3        |                                                                                                                                                                                                                                                                                                                             | - | AtoG | 0.1053 | 0.1818 | 5  | 2  | [11,19]   |
| chr17:37900711  | ATP6VOA1 | coding_exon | ENST00000264649:PtoQ;ENST00000343619:PtoQ;ENST00000393829:PtoQ;                                                                                                                                                                                                                                                             | + | CtoA | 0.1    | 0.1    | 4  | 2  | [10,10]   |
| chr12:122805037 | ATP6VOA2 | coding_exon | ENST00000330342:QtoE;                                                                                                                                                                                                                                                                                                       | + | CtoG | 0.1333 | 0.2308 | 5  | 4  | [13,30]   |
| chr12:122795451 | ATP6VOA2 | coding_exon | ENST00000330342:QtoE;                                                                                                                                                                                                                                                                                                       | + | TtoA | 0.1    | 0.1111 | 2  | 2  | [10,19]   |
| chr5:172394475  | ATP6VOE1 | UTR3        |                                                                                                                                                                                                                                                                                                                             | + | TtoA | 0.1    | 0.1818 | 4  | 2  | [10,11]   |
| chr7:149207791  | ATP6VOE2 | mixed       |                                                                                                                                                                                                                                                                                                                             | + | TtoC | 0.1    | 0.2143 | 2  | 2  | [14,21]   |
| chr3:115012358  | ATP6V1A  | UTR3        |                                                                                                                                                                                                                                                                                                                             | + | AtoG | 0.1    | 0.1429 | 3  | 3  | [10,14]   |
| chr3:115012510  | ATP6V1A  | UTR3        |                                                                                                                                                                                                                                                                                                                             | + | TtoC | 0.1    | 0.1    | 3  | 2  | [10,10]   |
| chr3:115013285  | ATP6V1A  | UTR3        |                                                                                                                                                                                                                                                                                                                             | + | TtoC | 0.1818 | 0.4615 | 5  | 3  | [11,14]   |
| chr14:66875010  | ATP6V1D  | UTR3        |                                                                                                                                                                                                                                                                                                                             | - | TtoG | 0.1    | 0.1538 | 3  | 2  | [10,14]   |
| chr22:16455263  | ATP6V1E1 | UTR3        |                                                                                                                                                                                                                                                                                                                             | - | AtoG | 0.38   | 0.587  | 7  | 7  | [50,93]   |
| chr7:128292697  | ATP6V1F  | coding_exon | ENST00000249289:ItoM;ENST00000492758:ItoM;                                                                                                                                                                                                                                                                                  | + | CtoG | 0.1    | 0.1    | 2  | 2  | [10,20]   |
| chr7:128290349  | ATP6V1F  | coding_exon | ENST00000249289:FtoS;ENST00000492758:FtoS;                                                                                                                                                                                                                                                                                  | + | TtoC | 0.1    | 0.3636 | 3  | 2  | [10,11]   |
| chr7:128290341  | ATP6V1F  | coding_exon | ENST00000249289:FtoS;ENST00000492758:FtoS;                                                                                                                                                                                                                                                                                  | + | AtoG | 0.2    | 0.2    | 2  | 2  | [10,10]   |
| chr9:116399939  | ATP6V1G1 | UTR3        |                                                                                                                                                                                                                                                                                                                             | + | TtoA | 0.1    | 0.2    | 5  | 2  | [10,30]   |
| chr6:31624154   | ATP6V1G2 | mixed       |                                                                                                                                                                                                                                                                                                                             | - | CtoA | 0.1    | 0.1538 | 2  | 2  | [10,13]   |
| chr8:54847116   | ATP6V1H  | coding_exon | ENST00000355221:StoR;ENST00000359530:StoR;ENST00000396774:StoR;ENST00000355221:QtoP;ENST00000359530:QtoP;ENST00000396774:QtoP;ENST00000355221:KtoR;ENST00000359530:KtoR;ENST00000396774:KtoR;ENST00000355221:GtoT;ENST00000359530:GtoT;ENST00000396774:GtoT;ENST00000355221:KtoT;ENST00000359530:KtoT;ENST00000396774:KtoT; | - | TtoG | 0.1    | 0.1111 | 2  | 2  | [10,18]   |
| chr8:54916703   | ATP6V1H  | coding_exon | ENST00000355221:QtoP;ENST00000359530:QtoP;ENST00000396774:QtoP;ENST00000355221:KtoR;ENST00000359530:KtoR;ENST00000396774:KtoR;ENST00000355221:GtoT;ENST00000359530:GtoT;ENST00000396774:GtoT;ENST00000355221:KtoT;ENST00000359530:KtoT;ENST00000396774:KtoT;                                                                | - | AtoC | 0.1333 | 0.1429 | 8  | 2  | [15,16]   |
| chr4:42161697   | ATP8A1   | coding_exon |                                                                                                                                                                                                                                                                                                                             | - | AtoG | 0.1053 | 0.1538 | 3  | 2  | [13,19]   |
| chr4:42107853   | ATP8A1   | UTR3        |                                                                                                                                                                                                                                                                                                                             | - | AtoG | 0.1    | 0.1481 | 2  | 2  | [10,27]   |
| chr4:42108951   | ATP8A1   | UTR3        |                                                                                                                                                                                                                                                                                                                             | - | TtoA | 0.1    | 0.1667 | 2  | 2  | [10,12]   |
| chr1:152585750  | ATP8B2   | coding_exon | ENST00000341831:ItoL;ENST00000368489:ItoL;                                                                                                                                                                                                                                                                                  | + | AtoC | 0.1    | 0.1    | 4  | 2  | [10,20]   |
| chr1:152585378  | ATP8B2   | coding_exon | ENST00000341831:ItoL;ENST00000368489:ItoL;                                                                                                                                                                                                                                                                                  | + | GtoA | 0.1    | 0.1111 | 3  | 2  | [10,10]   |
| chr1:152588928  | ATP8B2   | UTR3        |                                                                                                                                                                                                                                                                                                                             | + | TtoC | 0.1    | 0.1    | 2  | 2  | [10,11]   |
| chr1:46873333   | ATPAF1   | UTR3        |                                                                                                                                                                                                                                                                                                                             | - | AtoG | 0.1    | 0.1818 | 3  | 2  | [10,11]   |
| chr1:46873336   | ATPAF1   | UTR3        |                                                                                                                                                                                                                                                                                                                             | - | TtoC | 0.1    | 0.1364 | 7  | 2  | [10,23]   |
| chr1:46873696   | ATPAF1   | UTR3        |                                                                                                                                                                                                                                                                                                                             | - | TtoC | 0.1    | 0.1875 | 8  | 5  | [30,54]   |
| chr17:17865253  | ATPAF2   | coding_exon | ENST00000474627:LtoH;                                                                                                                                                                                                                                                                                                       | - | TtoA | 0.1    | 0.125  | 3  | 2  | [10,16]   |
| chr1:28435956   | ATPIF1   | mixed       |                                                                                                                                                                                                                                                                                                                             | + | CtoA | 0.1    | 0.1    | 2  | 2  | [10,10]   |
| chr1:28437197   | ATPIF1   | UTR3        |                                                                                                                                                                                                                                                                                                                             | + | AtoC | 0.1333 | 0.2593 | 3  | 2  | [15,30]   |
| chr3:48475813   | ATRIP    | coding_exon | ENST00000320211:QtoR;ENST00000346691:QtoR;ENST00000412052:QtoR;                                                                                                                                                                                                                                                             | + | AtoG | 0.1    | 0.1    | 3  | 2  | [10,10]   |
| chr6:16411005   | ATXN1    | UTR3        |                                                                                                                                                                                                                                                                                                                             | - | AtoC | 0.1    | 0.1    | 2  | 2  | [10,10]   |
| chr22:44618515  | ATXN10   | mixed       |                                                                                                                                                                                                                                                                                                                             | + | AtoG | 0.1029 | 0.1176 | 5  | 2  | [17,73]   |
| chr22:44618522  | ATXN10   | mixed       |                                                                                                                                                                                                                                                                                                                             | + | TtoA | 0.1    | 0.1176 | 4  | 2  | [10,18]   |
| chr16:70446498  | ATXN1L   | mixed       |                                                                                                                                                                                                                                                                                                                             | + | TtoC | 0.1    | 0.1176 | 2  | 2  | [10,17]   |
| chr16:70446633  | ATXN1L   | mixed       |                                                                                                                                                                                                                                                                                                                             | + | TtoA | 0.1    | 0.1    | 2  | 2  | [10,10]   |

|                 |          |             |                                                                                                                                                                                               |   |      |        |        |    |    |           |
|-----------------|----------|-------------|-----------------------------------------------------------------------------------------------------------------------------------------------------------------------------------------------|---|------|--------|--------|----|----|-----------|
| chr16:28755984  | ATXN2L   | UTR3        |                                                                                                                                                                                               | + | GtoA | 0.1111 | 0.1905 | 6  | 3  | [16,21]   |
| chr1:109835725  | ATXN7L2  | coding_exon | ENST00000369869:KtoE;ENST00000369870:KtoE;                                                                                                                                                    | + | Atog | 0.1    | 0.1333 | 2  | 2  | [15,20]   |
| chr17:39630550  | ATXN7L3  | coding_exon |                                                                                                                                                                                               | - | TtoA | 0.1389 | 0.3684 | 14 | 11 | [10,72]   |
| chr17:39630559  | ATXN7L3  | coding_exon |                                                                                                                                                                                               | - | Atog | 0.1176 | 0.3036 | 13 | 11 | [21,81]   |
| chr2:74607286   | AUP1     | UTR3        |                                                                                                                                                                                               | - | GtoA | 0.1    | 0.1    | 3  | 3  | [10,10]   |
| chr20:54394923  | AURKA    | coding_exon | ENST00000312783:VtoA;ENST00000347343:VtoA;ENST00000371356:VtoA;ENST00000312783:RtoW;ENST00000347343:RtoW;ENST00000371356:RtoW;ENST00000312783:UtoG;ENST00000347343:UtoG;ENST00000371356:UtoG; | - | TtoC | 0.1111 | 0.2083 | 5  | 3  | [17,24]   |
| chr20:54394903  | AURKA    | coding_exon | ENST00000312783:RtoW;ENST00000347343:RtoW;ENST00000371356:RtoW;ENST00000312783:UtoG;ENST00000347343:UtoG;ENST00000371356:UtoG;                                                                | - | CtoT | 0.1    | 0.1579 | 5  | 3  | [11,21]   |
| chr20:54378954  | AURKA    | coding_exon |                                                                                                                                                                                               | - | Atoc | 0.1    | 0.1111 | 2  | 2  | [10,18]   |
| chr20:54381921  | AURKA    | coding_exon |                                                                                                                                                                                               | - | Atog | 0.1    | 0.1538 | 2  | 2  | [10,13]   |
| chr7:69869250   | AUTS2    | coding_exon |                                                                                                                                                                                               | + | TtoC | 0.1    | 0.1111 | 2  | 2  | [10,27]   |
| chr7:69894297   | AUTS2    | UTR3        |                                                                                                                                                                                               | + | GtoA | 0.1    | 0.1    | 3  | 3  | [10,11]   |
| chr15:31950443  | AVEN     | coding_exon |                                                                                                                                                                                               | - | TtoC | 0.125  | 0.1667 | 3  | 2  | [12,16]   |
| chr15:31946053  | AVEN     | UTR3        |                                                                                                                                                                                               | - | TtoG | 0.1    | 0.1818 | 3  | 2  | [11,11]   |
| chr7:32874426   | AVL9     | coding_exon |                                                                                                                                                                                               | + | GtoC | 0.1333 | 0.1667 | 3  | 2  | [12,15]   |
| chr7:32874431   | AVL9     | coding_exon |                                                                                                                                                                                               | + | CtoT | 0.1    | 0.1176 | 2  | 2  | [10,17]   |
| chr7:32875472   | AVL9     | coding_exon |                                                                                                                                                                                               | + | Atog | 0.1    | 0.1    | 3  | 2  | [10,10]   |
| chr7:32876887   | AVL9     | coding_exon |                                                                                                                                                                                               | + | Atog | 0.1538 | 0.3    | 2  | 2  | [10,13]   |
| chr7:33020279   | AVL9     | coding_exon |                                                                                                                                                                                               | + | TtoC | 0.1    | 0.1176 | 3  | 2  | [10,17]   |
| chr17:76786610  | AZ11     | coding_exon | ENST00000269392:LtoP;ENST00000374782:LtoP;ENST00000450824:LtoP;                                                                                                                               | - | TtoC | 0.1    | 0.1176 | 2  | 2  | [11,17]   |
| chr8:103910812  | AZIN1    | coding_exon | ENST00000337198:StoG;ENST00000347770:StoG;                                                                                                                                                    | - | Atog | 0.1226 | 0.3708 | 17 | 10 | [20,128]  |
| chr8:103910813  | AZIN1    | coding_exon |                                                                                                                                                                                               | - | Atog | 0.101  | 0.1011 | 5  | 2  | [89,99]   |
| chr15:42797611  | B2M      | UTR3        |                                                                                                                                                                                               | + | Atog | 0.1026 | 0.2143 | 8  | 6  | [14,52]   |
| chr15:42791000  | B2M      | UTR5        |                                                                                                                                                                                               | + | GtoC | 0.2353 | 0.3636 | 3  | 2  | [11,17]   |
| chr15:42791002  | B2M      | UTR5        |                                                                                                                                                                                               | + | CtoG | 0.3571 | 0.9259 | 16 | 16 | [10,65]   |
| chr15:42791019  | B2M      | UTR5        |                                                                                                                                                                                               | + | GtoC | 0.102  | 0.2035 | 12 | 4  | [98,324]  |
| chr15:42791020  | B2M      | UTR5        |                                                                                                                                                                                               | + | Atot | 0.1054 | 0.3649 | 14 | 11 | [112,582] |
| chr1:233680195  | B3GALNT2 | coding_exon |                                                                                                                                                                                               | - | GtoC | 0.1    | 0.1    | 4  | 2  | [10,10]   |
| chr2:231973401  | B3GNT7   | UTR3        |                                                                                                                                                                                               | + | GtoA | 0.1    | 0.1053 | 2  | 2  | [10,19]   |
| chr9:33102787   | B4GALT1  | UTR3        |                                                                                                                                                                                               | - | Atog | 0.1    | 0.1818 | 5  | 2  | [10,12]   |
| chr1:44223273   | B4GALT2  | coding_exon | ENST00000309519:QtoH;ENST00000356836:QtoH;ENST00000372324:QtoH;ENST00000309519:UtoG;ENST00000356836:UtoG;ENST00000372324:UtoG;                                                                | + | Atoc | 0.1429 | 0.1905 | 4  | 2  | [15,21]   |
| chr3:120413607  | B4GALT4  | UTR3        |                                                                                                                                                                                               | - | TtoG | 0.1    | 0.1538 | 2  | 2  | [10,13]   |
| chr5:176969532  | B4GALT7  | UTR3        |                                                                                                                                                                                               | + | TtoG | 0.1176 | 0.1667 | 2  | 2  | [12,17]   |
| chr14:103096980 | BAG5     | coding_exon | ENST00000337322:ltoN;                                                                                                                                                                         | - | TtoA | 0.1    | 0.125  | 4  | 3  | [10,16]   |
| chr15:38543409  | BAHD01   | coding_exon | ENST00000339351:TtoA;ENST00000416165:TtoA;ENST00000442618:TtoA;                                                                                                                               | + | Atog | 0.1    | 0.1176 | 2  | 2  | [10,17]   |
| chr15:38541418  | BAHD01   | coding_exon | ENST00000339351:ltoP;ENST00000416165:ltoP;ENST00000442618:ltoP;                                                                                                                               | + | TtoC | 0.1333 | 0.1538 | 3  | 2  | [13,15]   |
| chr16:1339246   | BAIAP3   | UTR3        |                                                                                                                                                                                               | + | TtoC | 0.1818 | 0.1818 | 3  | 2  | [11,11]   |
| chr16:86668321  | BANP     | UTR3        |                                                                                                                                                                                               | + | GtoT | 0.1    | 0.1667 | 4  | 2  | [10,12]   |
| chr2:215301803  | BARD1    | mixed       |                                                                                                                                                                                               | - | CtoG | 0.1    | 0.1    | 3  | 2  | [10,10]   |
| chr5:17329741   | BASP1    | coding_exon | ENST00000322611:NtoK;                                                                                                                                                                         | + | TtoA | 0.1064 | 0.1071 | 7  | 2  | [28,48]   |
| chr5:17329742   | BASP1    | coding_exon | ENST00000322611:Etok;                                                                                                                                                                         | + | GtoA | 0.129  | 0.1333 | 3  | 3  | [15,46]   |
| chr6:31611139   | BAT1     | coding_exon | ENST00000376177:RtoH;ENST00000396172:RtoH;ENST00000415382:RtoH;ENST00000376177:UtoG;ENST00000396172:UtoG;ENST00000415382:UtoG;                                                                | - | GtoA | 0.119  | 0.2308 | 4  | 2  | [52,84]   |
| chr6:31606044   | BAT1     | UTR3        |                                                                                                                                                                                               | - | Atog | 0.1053 | 0.1667 | 5  | 3  | [12,25]   |
| chr6:31713480   | BAT2     | UTR3        |                                                                                                                                                                                               | + | TtoC | 0.125  | 0.1429 | 4  | 2  | [16,21]   |
| chr1:169824161  | BAT2D1   | coding_exon | ENST00000338920:TtoP;ENST00000345788:NtoT;ENST00000367742:TtoP;ENST00000338920:UtoG;ENST00000345788:UtoG;ENST00000367742:UtoG;                                                                | + | Atoc | 0.1    | 0.3043 | 6  | 5  | [10,24]   |
| chr1:169827349  | BAT2D1   | mixed       |                                                                                                                                                                                               | + | GtoA | 0.1053 | 0.1765 | 6  | 2  | [17,19]   |
| chr9:133324507  | BAT2L    | mixed       |                                                                                                                                                                                               | + | Atog | 0.125  | 0.1667 | 2  | 2  | [12,16]   |
| chr9:133341305  | BAT2L    | mixed       |                                                                                                                                                                                               | + | TtoC | 0.1    | 0.1429 | 2  | 2  | [10,14]   |
| chr9:133363085  | BAT2L    | UTR3        |                                                                                                                                                                                               | + | Atog | 0.1111 | 0.1224 | 7  | 3  | [18,49]   |
| chr9:133363945  | BAT2L    | UTR3        |                                                                                                                                                                                               | + | Atog | 0.1154 | 0.1667 | 2  | 2  | [18,26]   |
| chr9:133364703  | BAT2L    | UTR3        |                                                                                                                                                                                               | + | TtoG | 0.3    | 0.4706 | 2  | 2  | [10,17]   |
| chr6:31714807   | BAT3     | UTR3        |                                                                                                                                                                                               | - | Atog | 0.1111 | 0.1818 | 4  | 2  | [10,11]   |
| chr6:31714811   | BAT3     | UTR3        |                                                                                                                                                                                               | - | TtoC | 0.1    | 0.1    | 4  | 2  | [10,10]   |
| chr1:210926502  | BATF3    | UTR3        |                                                                                                                                                                                               | - | TtoA | 0.1    | 0.1579 | 6  | 2  | [10,19]   |
| chr19:54155954  | BAX      | mixed       |                                                                                                                                                                                               | + | TtoG | 0.1349 | 0.1767 | 4  | 4  | [108,318] |
| chr19:54156835  | BAX      | UTR3        |                                                                                                                                                                                               | + | CtoG | 0.1    | 0.1667 | 3  | 2  | [10,12]   |
| chr14:34340105  | BAZ1A    | coding_exon | ENST00000358716:KtoE;ENST00000360310:KtoE;ENST00000382422:KtoE;                                                                                                                               | - | Atog | 0.1071 | 0.1579 | 5  | 2  | [19,29]   |
| chr14:34293838  | BAZ1A    | coding_exon | ENST00000358716:ltoV;ENST00000360310:ltoV;ENST00000382422:ltoV;                                                                                                                               | - | Atog | 0.125  | 0.1667 | 7  | 2  | [12,16]   |
| chr14:34365030  | BAZ1A    | coding_exon | ENST00000358716:Etog;ENST00000360310:Etog;ENST00000382422:Etog;                                                                                                                               | - | Atog | 0.1333 | 0.1667 | 12 | 4  | [12,16]   |
| chr14:34333806  | BAZ1A    | coding_exon |                                                                                                                                                                                               | - | TtoC | 0.1    | 0.1026 | 9  | 2  | [20,78]   |
| chr7:72494429   | BAZ1B    | UTR3        |                                                                                                                                                                                               | - | GtoA | 0.1429 | 0.1667 | 4  | 2  | [19,28]   |
| chr12:55297583  | BAZ2A    | mixed       |                                                                                                                                                                                               | - | Atog | 0.1538 | 0.1667 | 2  | 2  | [12,13]   |
| chr12:55316234  | BAZ2A    | mixed       |                                                                                                                                                                                               | - | GtoA | 0.1818 | 0.3333 | 3  | 3  | [11,12]   |
| chr12:55276872  | BAZ2A    | UTR3        |                                                                                                                                                                                               | - | TtoG | 0.1111 | 0.3    | 6  | 2  | [10,19]   |
| chr12:55278023  | BAZ2A    | UTR3        |                                                                                                                                                                                               | - | Atog | 0.1    | 0.1    | 3  | 2  | [10,10]   |
| chr2:159948369  | BAZ2B    | coding_exon | ENST00000343439:LtoP;ENST00000355831:LtoP;ENST00000392782:LtoP;ENST00000343439:UtoG;ENST00000355831:UtoG;ENST00000392782:UtoG;                                                                | - | TtoC | 0.1176 | 0.125  | 4  | 2  | [16,17]   |
| chr3:108949517  | BBX      | mixed       |                                                                                                                                                                                               | + | TtoC | 0.1667 | 0.1667 | 2  | 2  | [12,18]   |
| chr3:108974545  | BBX      | mixed       |                                                                                                                                                                                               | + | GtoC | 0.1    | 0.1111 | 3  | 2  | [11,18]   |
| chr3:109007318  | BBX      | UTR3        |                                                                                                                                                                                               | + | Atog | 0.1    | 0.1667 | 3  | 2  | [10,12]   |
| chr3:109008111  | BBX      | UTR3        |                                                                                                                                                                                               | + | TtoA | 0.1    | 0.1    | 3  | 2  | [10,10]   |
| chr7:107023576  | BCAP29   | coding_exon | ENST00000005259:TtoS;ENST00000379117:TtoS;ENST00000379119:TtoS;ENST00000005259:UtoG;ENST00000379117:UtoG;ENST00000379119:UtoG;                                                                | + | Atot | 0.1    | 0.1    | 2  | 2  | [10,10]   |
| chr16:73820739  | BCAR1    | UTR3        |                                                                                                                                                                                               | - | TtoG | 0.125  | 0.1429 | 2  | 2  | [14,16]   |
| chr16:73820773  | BCAR1    | UTR3        |                                                                                                                                                                                               | - | Atog | 0.1    | 0.1    | 3  | 2  | [10,10]   |
| chr12:24886323  | BCAT1    | coding_exon |                                                                                                                                                                                               | - | Atog | 0.1111 | 0.125  | 4  | 2  | [10,17]   |
| chr12:24855651  | BCAT1    | UTR3        |                                                                                                                                                                                               | - | Atog | 0.1    | 0.1    | 3  | 2  | [10,10]   |
| chr12:24855752  | BCAT1    | UTR3        |                                                                                                                                                                                               | - | Atog | 0.1053 | 0.1111 | 4  | 2  | [20,36]   |
| chr12:24860543  | BCAT1    | UTR3        |                                                                                                                                                                                               | - | Atog | 0.1    | 0.1429 | 2  | 2  | [10,14]   |
| chr10:127531859 | BCCIP    | UTR3        |                                                                                                                                                                                               | + | Atog | 0.1667 | 0.2    | 3  | 2  | [10,12]   |
| chr16:31031389  | BCKDK    | UTR3        |                                                                                                                                                                                               | + | CtoA | 0.1333 | 0.2727 | 4  | 3  | [10,15]   |
| chr18:58941947  | BCL2     | UTR3        |                                                                                                                                                                                               | - | TtoA | 0.125  | 0.1818 | 4  | 2  | [11,17]   |
| chr18:58942148  | BCL2     | UTR3        |                                                                                                                                                                                               | - | TtoC | 0.1136 | 0.1351 | 9  | 2  | [37,45]   |
| chr18:58943301  | BCL2     | UTR3        |                                                                                                                                                                                               | - | Atot | 0.1    | 0.1    | 2  | 2  | [10,10]   |
| chr18:58944711  | BCL2     | UTR3        |                                                                                                                                                                                               | - | TtoA | 0.15   | 0.1538 | 5  | 2  | [13,20]   |
| chr18:58944712  | BCL2     | UTR3        |                                                                                                                                                                                               | - | TtoG | 0.125  | 0.1538 | 7  | 3  | [13,20]   |
| chr18:58945266  | BCL2     | UTR3        |                                                                                                                                                                                               | - | TtoC | 0.1111 | 0.125  | 6  | 2  | [18,24]   |
| chr18:58945313  | BCL2     | UTR3        |                                                                                                                                                                                               | - | CtoA | 0.1    | 0.3    | 11 | 7  | [10,27]   |
| chr18:58945345  | BCL2     | UTR3        |                                                                                                                                                                                               | - | TtoC | 0.1    | 0.1538 | 3  | 2  | [10,13]   |
| chr18:58946100  | BCL2     | UTR3        |                                                                                                                                                                                               | - | GtoA | 0.125  | 0.125  | 4  | 2  | [16,16]   |
| chr18:59137683  | BCL2     | UTR5        |                                                                                                                                                                                               | - | Atog | 0.1111 | 0.1429 | 3  | 2  | [22,27]   |
| chr15:78040528  | BCL2A1   | mixed       |                                                                                                                                                                                               | - | TtoA | 0.1053 | 0.1429 | 6  | 3  | [17,41]   |
| chr15:78040321  | BCL2A1   | UTR3        |                                                                                                                                                                                               | - | Atog | 0.1304 | 0.4    | 5  | 4  | [11,23]   |
| chr15:78040326  | BCL2A1   | UTR3        |                                                                                                                                                                                               | - | TtoC | 0.1169 | 0.4    | 8  | 6  | [10,77]   |
| chr22:16590463  | BCL2L13  | UTR3        |                                                                                                                                                                                               | + | TtoC | 0.1    | 0.1667 | 8  | 4  | [20,29]   |
| chr14:22850238  | BCL2L2   | UTR3        |                                                                                                                                                                                               | + | Atot | 0.1    | 0.1    | 2  | 2  | [10,10]   |
| chr16:30806649  | BCL7C    | mixed       |                                                                                                                                                                                               | - | TtoG | 0.1    | 0.1667 | 3  | 2  | [10,18]   |
| chr11:118274166 | BCL9L    | mixed       |                                                                                                                                                                                               | - | Atog | 0.1333 | 0.2    | 2  | 2  | [15,15]   |
| chr22:21933647  | BCR      | coding_exon | ENST00000305877:KtoE;ENST00000359540:KtoE;                                                                                                                                                    | + | Atog | 0.1    | 0.1    | 2  | 2  | [10,11]   |

|                 |         |             |                                                                          |   |      |        |        |    |   |           |
|-----------------|---------|-------------|--------------------------------------------------------------------------|---|------|--------|--------|----|---|-----------|
| chr2:219234174  | BCS1L   | coding_exon | ENST00000359273:TtoS;ENST00000392109:TtoS;ENST00000392110:TtoS;ENST000   | + | AtoT | 0.1667 | 0.1818 | 4  | 2 | [11,12]   |
| chr2:219233054  | BCS1L   | UTR5        |                                                                          | + | AtoG | 0.1    | 0.1818 | 4  | 2 | [10,11]   |
| chr2:219233908  | BCS1L   | UTR5        |                                                                          | + | TtoA | 0.1    | 0.1    | 3  | 2 | [10,10]   |
| chr17:38216135  | BECN1   | UTR3        |                                                                          | - | TtoC | 0.1034 | 0.1429 | 6  | 2 | [14,29]   |
| chr16:14651163  | BFAR    | coding_exon | ENST00000261658:VtoG;ENST00000426842:VtoG;                               | + | TtoG | 0.1    | 0.1667 | 9  | 4 | [10,18]   |
| chr16:14656426  | BFAR    | coding_exon | ENST00000261658:LtoW;ENST00000426842:LtoW;                               | + | TtoG | 0.1429 | 0.1429 | 5  | 2 | [14,14]   |
| chr16:14656427  | BFAR    | coding_exon |                                                                          | + | GtoA | 0.125  | 0.1333 | 2  | 2 | [15,16]   |
| chr9:94514501   | BICD2   | UTR3        |                                                                          | - | TtoA | 0.1    | 0.125  | 2  | 2 | [16,20]   |
| chr22:16596939  | BID     | UTR3        |                                                                          | - | GtoA | 0.1    | 0.1    | 2  | 2 | [10,10]   |
| chr8:22537384   | BIN3    | coding_exon | ENST00000276416:ltoL;                                                    | - | AtoC | 0.1    | 0.1333 | 2  | 2 | [10,15]   |
| chr11:101738866 | BIRC2   | coding_exon | ENST00000227758:QtoR;                                                    | + | AtoG | 0.125  | 0.1875 | 6  | 2 | [16,16]   |
| chr11:101753527 | BIRC2   | coding_exon | ENST00000227758:NtoS;                                                    | + | AtoG | 0.1    | 0.1818 | 2  | 2 | [10,11]   |
| chr11:101724956 | BIRC2   | UTR5        |                                                                          | + | AtoC | 0.1    | 0.1    | 2  | 2 | [10,10]   |
| chr11:101713057 | BIRC3   | UTR3        |                                                                          | + | CtoG | 0.1    | 0.1429 | 3  | 2 | [10,14]   |
| chr11:101713062 | BIRC3   | UTR3        |                                                                          | + | TtoC | 0.1111 | 0.1818 | 2  | 2 | [10,11]   |
| chr11:101699446 | BIRC3   | UTR5        |                                                                          | + | AtoG | 0.1    | 0.1333 | 2  | 2 | [10,15]   |
| chr17:73732617  | BIRC5   | UTR3        |                                                                          | + | TtoC | 0.1    | 0.1429 | 4  | 2 | [10,14]   |
| chr2:32604149   | BIRC6   | coding_exon | ENST00000261359:NtoS;ENST00000421745:NtoS;                               | + | AtoG | 0.1    | 0.1538 | 2  | 2 | [10,13]   |
| chr2:32543185   | BIRC6   | coding_exon |                                                                          | + | TtoC | 0.1111 | 0.1538 | 2  | 2 | [13,18]   |
| chr2:32546242   | BIRC6   | coding_exon |                                                                          | + | AtoG | 0.1    | 0.1818 | 2  | 2 | [10,11]   |
| chr2:32591549   | BIRC6   | coding_exon |                                                                          | + | TtoA | 0.1    | 0.1    | 6  | 2 | [10,10]   |
| chr2:35580977   | BLCAP   | coding_exon | ENST00000414542:QtoR;                                                    | - | AtoG | 0.1034 | 0.1875 | 6  | 5 | [16,44]   |
| chr15:89155557  | BLM     | coding_exon | ENST00000355112:RtoS;                                                    | + | AtoC | 0.1111 | 0.125  | 5  | 2 | [10,16]   |
| chr15:89153444  | BLM     | coding_exon |                                                                          | + | TtoC | 0.1    | 0.1    | 5  | 2 | [10,10]   |
| chr15:89159564  | BLM     | UTR3        |                                                                          | + | AtoC | 0.1    | 0.1    | 2  | 2 | [10,10]   |
| chr10:97957645  | BLNK    | coding_exon |                                                                          | - | GtoA | 0.1068 | 0.165  | 14 | 7 | [37,176]  |
| chr10:97941486  | BLNK    | UTR3        |                                                                          | - | TtoA | 0.1333 | 0.2    | 4  | 3 | [11,16]   |
| chr12:54399743  | BLOC1S1 | UTR3        |                                                                          | + | CtoG | 0.2    | 0.3125 | 6  | 3 | [12,20]   |
| chr12:54399749  | BLOC1S1 | UTR3        |                                                                          | + | TtoC | 0.1818 | 0.4247 | 4  | 3 | [11,77]   |
| chr10:102030756 | BLOC1S2 | coding_exon | ENST00000358848:TtoA;ENST00000361832:TtoA;ENST00000370372:TtoA;ENST000   | - | AtoG | 0.1    | 0.1    | 3  | 3 | [10,10]   |
| chr19:50376597  | BLOC1S3 | mixed       |                                                                          | + | AtoG | 0.1    | 0.1    | 2  | 2 | [10,10]   |
| chr7:43813453   | BLVRA   | UTR3        |                                                                          | + | TtoC | 0.1364 | 0.1818 | 9  | 2 | [11,23]   |
| chr19:45645561  | BLVRB   | UTR3        |                                                                          | - | AtoG | 0.1034 | 0.1176 | 4  | 2 | [17,29]   |
| chr15:38171011  | BMF     | UTR3        |                                                                          | - | TtoG | 0.1    | 0.1818 | 3  | 2 | [10,11]   |
| chr14:53486382  | BMP4    | UTR3        |                                                                          | - | TtoC | 0.1176 | 0.2    | 2  | 2 | [10,17]   |
| chr10:42612512  | BMS1    | coding_exon | ENST00000374518:EtoG;                                                    | + | AtoG | 0.1    | 0.1053 | 3  | 3 | [10,19]   |
| chr10:42617671  | BMS1    | coding_exon | ENST00000374518:DtoE;                                                    | + | TtoG | 0.1    | 0.2143 | 10 | 5 | [10,69]   |
| chr10:42612534  | BMS1    | coding_exon |                                                                          | + | TtoG | 0.2    | 0.2222 | 4  | 2 | [10,15]   |
| chr15:57752218  | BNIP2   | coding_exon | ENST00000267859:DtoG;ENST00000409352:DtoG;ENST00000415213:DtoG;          | - | AtoG | 0.1    | 0.1053 | 3  | 2 | [19,20]   |
| chr15:57742801  | BNIP2   | UTR3        |                                                                          | - | TtoC | 0.1    | 0.2    | 2  | 2 | [10,10]   |
| chr10:133636610 | BNIP3   | coding_exon | ENST00000368636:PtoR;                                                    | - | CtoG | 0.1    | 0.1    | 2  | 2 | [10,10]   |
| chr4:13212472   | BOD1L   | coding_exon | ENST0000040738:MtoT;                                                     | - | TtoC | 0.1    | 0.1    | 4  | 2 | [10,10]   |
| chr4:13209670   | BOD1L   | coding_exon | ENST0000040738:ltoK;                                                     | - | TtoA | 0.1    | 0.1818 | 4  | 3 | [10,11]   |
| chr4:13210336   | BOD1L   | coding_exon | ENST0000040738:EtoG;                                                     | - | AtoG | 0.1    | 0.1    | 2  | 2 | [10,10]   |
| chr4:13212562   | BOD1L   | coding_exon | ENST0000040738:DtoG;                                                     | - | AtoG | 0.1    | 0.1    | 2  | 2 | [10,10]   |
| chr4:13211673   | BOD1L   | coding_exon |                                                                          | - | AtoG | 0.1    | 0.1176 | 3  | 2 | [10,17]   |
| chr4:13211859   | BOD1L   | coding_exon |                                                                          | - | TtoC | 0.1    | 0.1    | 2  | 2 | [10,10]   |
| chr2:74216147   | BOLA3   | UTR3        |                                                                          | - | AtoC | 0.1    | 0.2    | 2  | 2 | [10,10]   |
| chr2:74216150   | BOLA3   | UTR3        |                                                                          | - | AtoG | 0.1    | 0.2    | 7  | 2 | [10,10]   |
| chr7:134014547  | BPGM    | UTR3        |                                                                          | + | GtoT | 0.1    | 0.1    | 2  | 2 | [10,10]   |
| chr6:3097897    | BPHL    | UTR3        |                                                                          | + | TtoC | 0.1    | 0.2    | 3  | 2 | [10,10]   |
| chr1:218297821  | BPNT1   | mixed       |                                                                          | - | TtoC | 0.1    | 0.1    | 3  | 2 | [10,10]   |
| chr17:63338973  | BPTF    | coding_exon | ENST00000306378:LtoP;ENST00000321892:LtoP;ENST00000335221:LtoP;          | + | TtoC | 0.1    | 0.1111 | 4  | 2 | [10,18]   |
| chr17:63331327  | BPTF    | coding_exon |                                                                          | + | TtoG | 0.1538 | 0.2    | 4  | 2 | [13,15]   |
| chr17:63339727  | BPTF    | coding_exon |                                                                          | + | AtoG | 0.1    | 0.1667 | 2  | 2 | [10,12]   |
| chr7:140124301  | BRAF    | coding_exon |                                                                          | - | TtoC | 0.1    | 0.25   | 2  | 2 | [10,12]   |
| chr12:110580934 | BRAP    | coding_exon | ENST00000327551:LtoV;ENST00000419234:LtoV;                               | - | TtoG | 0.1    | 0.1667 | 3  | 2 | [10,12]   |
| chr12:110587859 | BRAP    | coding_exon | ENST00000327551:HtoP;ENST00000419234:HtoP;                               | - | AtoC | 0.1    | 0.2667 | 7  | 5 | [10,15]   |
| chr17:38497514  | BRCA1   | coding_exon | ENST00000309486:StoI;ENST00000346315:StoI;ENST00000353540:StoI;ENST00000 | - | GtoT | 0.1    | 0.1    | 2  | 2 | [10,20]   |
| chr17:38453188  | BRCA1   | coding_exon | ENST00000309486:HtoP;ENST00000346315:HtoP;ENST00000351666:HtoP;ENST000   | - | AtoC | 0.1333 | 0.2    | 3  | 2 | [10,15]   |
| chr17:38451234  | BRCA1   | mixed       |                                                                          | - | AtoC | 0.1429 | 0.2857 | 4  | 4 | [13,15]   |
| chr17:38450248  | BRCA1   | UTR3        |                                                                          | - | TtoG | 0.1    | 0.1333 | 2  | 2 | [10,15]   |
| chr13:31870541  | BRCA2   | coding_exon |                                                                          | + | AtoG | 0.1    | 0.1    | 2  | 2 | [10,10]   |
| chr6:33051844   | BRD2    | coding_exon | ENST00000374825:VtoA;ENST00000374831:VtoA;ENST00000395287:VtoA;ENST000   | + | TtoC | 0.1    | 0.125  | 3  | 2 | [10,16]   |
| chr6:33051159   | BRD2    | coding_exon | ENST00000374825:KtoN;ENST00000374831:KtoN;ENST00000395287:KtoN;ENST000   | + | AtoC | 0.1176 | 0.1765 | 6  | 2 | [17,17]   |
| chr6:33056699   | BRD2    | UTR3        |                                                                          | + | CtoG | 0.4545 | 0.5125 | 2  | 2 | [155,160] |
| chr9:135905466  | BRD3    | coding_exon | ENST00000303407:TtoP;ENST00000357885:TtoP;ENST00000371834:TtoP;          | - | AtoC | 0.1    | 0.1    | 2  | 2 | [10,10]   |
| chr9:135889750  | BRD3    | coding_exon |                                                                          | - | AtoG | 0.1    | 0.2143 | 3  | 2 | [10,14]   |
| chr16:48946222  | BRD7    | coding_exon | ENST00000394688:StoC;ENST00000394689:StoC;ENST00000401491:StoC;          | - | CtoG | 0.1154 | 0.1333 | 2  | 2 | [15,26]   |
| chr16:48912134  | BRD7    | coding_exon | ENST00000394688:LtoR;ENST00000394689:LtoR;                               | - | TtoG | 0.1176 | 0.1429 | 8  | 3 | [14,18]   |
| chr16:48946217  | BRD7    | coding_exon | ENST00000394688:AtoS;ENST00000394689:AtoS;ENST00000401491:AtoS;          | - | GtoT | 0.1    | 0.1034 | 2  | 2 | [10,29]   |
| chr5:137520636  | BRD8    | mixed       |                                                                          | - | AtoG | 0.125  | 0.1429 | 5  | 2 | [14,16]   |
| chr5:944832     | BRD9    | mixed       |                                                                          | - | AtoG | 0.1    | 0.1333 | 4  | 2 | [10,15]   |
| chr5:944834     | BRD9    | mixed       |                                                                          | - | AtoG | 0.1111 | 0.1176 | 3  | 2 | [17,18]   |
| chr2:28374804   | BRE     | mixed       |                                                                          | + | CtoA | 0.1    | 0.125  | 2  | 2 | [16,20]   |
| chr12:124076149 | BRI3BP  | UTR3        |                                                                          | + | TtoC | 0.1    | 0.125  | 3  | 2 | [10,16]   |
| chr11:65864219  | BRMS1   | coding_exon | ENST00000359957:StoP;ENST00000425825:StoP;                               | - | TtoC | 0.1    | 0.1176 | 2  | 2 | [10,17]   |
| chr11:65861449  | BRMS1   | UTR3        |                                                                          | - | TtoC | 0.1    | 0.1818 | 10 | 4 | [10,15]   |
| chr3:9757582    | BRPF1   | coding_exon | ENST00000302054:LtoP;ENST00000383829:LtoP;ENST00000424362:LtoP;ENST000   | + | TtoC | 0.1    | 0.1    | 2  | 2 | [10,10]   |
| chr3:9756542    | BRPF1   | coding_exon | ENST00000302054:KtoE;ENST00000383829:KtoE;ENST00000424362:KtoE;ENST000   | + | AtoG | 0.1    | 0.125  | 4  | 2 | [10,16]   |
| chr11:62214851  | BSCL2   | coding_exon | ENST00000278893:KtoR;                                                    | - | AtoG | 0.6    | 0.7692 | 2  | 2 | [13,40]   |
| chr1:32603892   | BSDC1   | UTR3        |                                                                          | - | TtoC | 0.1    | 0.2    | 3  | 2 | [10,10]   |
| chr19:523628    | BSG     | mixed       |                                                                          | + | GtoA | 0.9954 | 1      | 8  | 8 | [31,294]  |
| chr19:534449    | BSG     | UTR3        |                                                                          | + | TtoC | 0.1146 | 0.1447 | 5  | 4 | [51,115]  |
| chr19:17374757  | BST2    | mixed       |                                                                          | - | GtoA | 0.1    | 0.1333 | 3  | 2 | [10,15]   |
| chr19:17374758  | BST2    | mixed       |                                                                          | - | AtoG | 0.1071 | 0.2727 | 11 | 5 | [11,28]   |
| chr10:93757951  | BTAF1   | coding_exon | ENST00000265990:KtoR;                                                    | + | AtoG | 0.1    | 0.1667 | 5  | 3 | [10,14]   |
| chr10:93760833  | BTAF1   | coding_exon | ENST00000265990:HtoR;                                                    | + | AtoG | 0.1    | 0.1053 | 3  | 2 | [10,19]   |
| chr10:93760849  | BTAF1   | coding_exon |                                                                          | + | TtoG | 0.1333 | 0.1765 | 3  | 2 | [15,17]   |
| chr16:3572633   | BTBD12  | coding_exon | ENST00000294008:EtoG;                                                    | - | AtoG | 0.1    | 0.1    | 4  | 2 | [10,10]   |
| chr1:201543867  | BTG2    | UTR3        |                                                                          | + | AtoG | 0.1053 | 0.3056 | 7  | 5 | [15,36]   |
| chr1:201543876  | BTG2    | UTR3        |                                                                          | + | AtoG | 0.1    | 0.2941 | 8  | 7 | [13,50]   |
| chr1:201544476  | BTG2    | UTR3        |                                                                          | + | AtoG | 0.1    | 0.15   | 3  | 2 | [10,20]   |
| chr1:201545349  | BTG2    | UTR3        |                                                                          | + | AtoC | 0.1111 | 0.1111 | 2  | 2 | [10,10]   |
| chr3:113666014  | BTLA    | UTR3        |                                                                          | - | TtoG | 0.1429 | 0.1818 | 3  | 2 | [11,14]   |
| chr3:113666639  | BTLA    | UTR3        |                                                                          | - | AtoG | 0.1    | 0.125  | 4  | 2 | [10,16]   |

|                 |           |             |                                                                                      |   |      |        |        |    |    |         |
|-----------------|-----------|-------------|--------------------------------------------------------------------------------------|---|------|--------|--------|----|----|---------|
| chr3:113667086  | BTLA      | UTR3        |                                                                                      | - | TtoC | 0.125  | 0.1667 | 2  | 2  | [12,16] |
| chr6:26576421   | BTN2A1    | mixed       |                                                                                      | + | CtoT | 0.1429 | 0.1538 | 3  | 2  | [13,14] |
| chr6:26499056   | BTN2A2    | coding_exon |                                                                                      | + | TtoC | 0.1667 | 0.6    | 5  | 5  | [10,18] |
| chr6:26499169   | BTN2A2    | coding_exon |                                                                                      | + | GtoA | 0.1429 | 0.2353 | 4  | 4  | [14,18] |
| chr6:26519784   | BTN3A1    | coding_exon |                                                                                      | + | GtoA | 0.1    | 0.1364 | 3  | 2  | [10,22] |
| chr6:26521298   | BTN3A1    | mixed       |                                                                                      | + | CtoT | 0.1176 | 0.4545 | 3  | 3  | [11,17] |
| chr6:26521341   | BTN3A1    | mixed       |                                                                                      | + | TtoC | 0.2    | 0.2308 | 4  | 3  | [10,13] |
| chr6:26513657   | BTN3A1    | UTR5        |                                                                                      | + | AtoG | 0.1    | 0.1    | 2  | 2  | [10,10] |
| chr6:26483004   | BTN3A2    | UTR3        |                                                                                      | + | TtoA | 0.1    | 0.2308 | 15 | 8  | [13,48] |
| chr6:26485464   | BTN3A2    | UTR3        |                                                                                      | + | AtoC | 0.1053 | 0.2143 | 7  | 3  | [14,29] |
| chr10:103303344 | BTRC      | UTR3        |                                                                                      | + | TtoC | 0.1    | 0.1    | 2  | 2  | [10,10] |
| chr2:111112186  | BUB1      | coding_exon | ENST00000302759:NtoD;ENST00000409311:NtoD;                                           | - | AtoG | 0.1    | 0.1429 | 8  | 4  | [10,28] |
| chr2:111140447  | BUB1      | coding_exon | ENST00000302759:HtoR;ENST00000409311:HtoR;                                           | - | AtoG | 0.1111 | 0.1667 | 2  | 2  | [18,18] |
| chr11:116138642 | BUD13     | coding_exon |                                                                                      | - | AtoG | 0.1    | 0.1333 | 6  | 3  | [10,17] |
| chr11:116146067 | BUD13     | coding_exon |                                                                                      | - | AtoG | 0.1333 | 0.15   | 2  | 2  | [15,20] |
| chr5:34961342   | BXDC2     | coding_exon |                                                                                      | + | TtoC | 0.1    | 0.1667 | 2  | 2  | [18,20] |
| chr1:84734566   | BXDC5     | coding_exon |                                                                                      | + | TtoC | 0.1176 | 0.1667 | 4  | 2  | [12,17] |
| chr1:84735774   | BXDC5     | UTR3        |                                                                                      | + | AtoT | 0.1    | 0.1333 | 4  | 2  | [10,15] |
| chr1:84735894   | BXDC5     | UTR3        |                                                                                      | + | TtoA | 0.1    | 0.1111 | 5  | 3  | [10,21] |
| chr6:42008149   | BYSL      | coding_exon | ENST00000230340:DtoE;                                                                | + | TtoA | 0.1    | 0.1053 | 2  | 2  | [19,20] |
| chr6:42008743   | BYSL      | UTR3        |                                                                                      | + | AtoG | 0.1111 | 0.2143 | 3  | 2  | [14,18] |
| chr2:201391338  | BZW1      | coding_exon | ENST00000353957:StoP;ENST00000409226:StoP;ENST00000409521:StoP;ENST00000409521:StoP; | + | TtoC | 0.1053 | 0.1429 | 2  | 2  | [14,19] |
| chr2:201391343  | BZW1      | coding_exon |                                                                                      | + | TtoC | 0.1    | 0.1154 | 2  | 2  | [10,26] |
| chr10:73660130  | C10orf104 | coding_exon | ENST00000299381:DtoG;                                                                | + | AtoG | 0.1034 | 0.1311 | 12 | 4  | [28,82] |
| chr10:73663032  | C10orf104 | UTR3        |                                                                                      | + | AtoG | 0.1154 | 0.1395 | 8  | 2  | [43,57] |
| chr10:121585098 | C10orf119 | coding_exon | ENST00000360003:Itov;ENST00000369077:Itov;                                           | - | AtoG | 0.1333 | 0.1707 | 7  | 5  | [12,41] |
| chr10:121580899 | C10orf119 | UTR3        |                                                                                      | - | AtoG | 0.1053 | 0.2    | 2  | 2  | [10,20] |
| chr10:121580933 | C10orf119 | UTR3        |                                                                                      | - | AtoG | 0.1    | 0.125  | 4  | 2  | [10,33] |
| chr10:97617660  | C10orf131 | mixed       |                                                                                      | + | CtoA | 0.2727 | 0.2727 | 3  | 2  | [11,11] |
| chr10:97622470  | C10orf131 | mixed       |                                                                                      | + | GtoA | 0.1    | 0.1    | 2  | 2  | [10,10] |
| chr10:97626380  | C10orf131 | mixed       |                                                                                      | + | TtoA | 0.1    | 0.1333 | 3  | 2  | [10,16] |
| chr10:127428036 | C10orf137 | mixed       |                                                                                      | + | AtoG | 0.1    | 0.1579 | 9  | 3  | [10,20] |
| chr10:5840915   | C10orf18  | coding_exon | ENST00000263123:WtoR;ENST00000328090:WtoR;ENST00000380270:WtoR;ENST00000380270:WtoR; | + | TtoA | 0.1    | 0.1    | 2  | 2  | [10,10] |
| chr10:5830542   | C10orf18  | coding_exon | ENST00000263123:NtoD;ENST00000328090:NtoD;ENST00000380270:NtoD;ENST00000380270:NtoD; | + | AtoG | 0.1    | 0.1    | 3  | 2  | [10,10] |
| chr10:5843265   | C10orf18  | coding_exon | ENST00000263123:DtoE;ENST00000328090:DtoE;ENST00000380270:DtoE;ENST00000380270:DtoE; | + | TtoG | 0.1    | 0.1    | 2  | 2  | [10,10] |
| chr10:102739392 | C10orf2   | coding_exon |                                                                                      | + | GtoT | 0.1    | 0.2273 | 2  | 2  | [10,22] |
| chr10:102743158 | C10orf2   | mixed       |                                                                                      | + | CtoA | 0.1    | 0.1    | 2  | 2  | [10,10] |
| chr10:102743921 | C10orf2   | UTR3        |                                                                                      | + | TtoC | 0.1    | 0.2    | 6  | 2  | [10,10] |
| chr10:104613583 | C10orf32  | UTR3        |                                                                                      | + | AtoC | 0.1    | 0.2    | 2  | 2  | [10,10] |
| chr10:95441830  | C10orf4   | coding_exon | ENST00000359204:LtoV;ENST00000371426:LtoV;ENST00000371430:LtoV;ENST00000371430:LtoV; | - | CtoG | 0.1    | 0.1111 | 2  | 2  | [10,18] |
| chr10:120431211 | C10orf46  | UTR3        |                                                                                      | - | AtoG | 0.1667 | 0.1818 | 4  | 2  | [11,24] |
| chr10:120431215 | C10orf46  | UTR3        |                                                                                      | - | TtoG | 0.2143 | 0.2857 | 5  | 3  | [14,18] |
| chr10:120432080 | C10orf46  | UTR3        |                                                                                      | - | AtoG | 0.1    | 0.1    | 2  | 2  | [10,10] |
| chr10:120432613 | C10orf46  | UTR3        |                                                                                      | - | TtoG | 0.1    | 0.1    | 2  | 2  | [10,10] |
| chr10:120435546 | C10orf46  | UTR3        |                                                                                      | - | CtoG | 0.1    | 0.1    | 2  | 2  | [10,10] |
| chr10:120435629 | C10orf46  | UTR3        |                                                                                      | - | TtoG | 0.1    | 0.1    | 2  | 2  | [10,10] |
| chr10:73180749  | C10orf54  | UTR3        |                                                                                      | - | AtoG | 0.1    | 0.1    | 2  | 2  | [10,10] |
| chr10:103751819 | C10orf76  | coding_exon | ENST00000370033:VtoD;                                                                | - | TtoA | 0.1    | 0.1667 | 5  | 2  | [10,12] |
| chr10:103595391 | C10orf76  | UTR3        |                                                                                      | - | TtoC | 0.1    | 0.1154 | 2  | 2  | [10,26] |
| chr10:103596425 | C10orf76  | UTR3        |                                                                                      | - | GtoT | 0.1    | 0.1    | 2  | 2  | [10,10] |
| chr10:103596961 | C10orf76  | UTR3        |                                                                                      | - | TtoA | 0.1333 | 0.2    | 4  | 2  | [10,15] |
| chr10:120085741 | C10orf84  | coding_exon |                                                                                      | - | GtoA | 0.1    | 0.1    | 2  | 2  | [10,10] |
| chr10:104200072 | C10orf95  | UTR3        |                                                                                      | - | TtoA | 0.1    | 0.2143 | 4  | 2  | [10,14] |
| chr11:111259827 | C11orf1   | UTR3        |                                                                                      | + | TtoC | 0.1    | 0.1667 | 4  | 2  | [10,12] |
| chr11:61313186  | C11orf10  | UTR3        |                                                                                      | - | TtoA | 0.1    | 0.1818 | 6  | 3  | [10,18] |
| chr11:61316633  | C11orf10  | UTR5        |                                                                                      | - | GtoC | 0.1071 | 0.1489 | 3  | 2  | [28,50] |
| chr11:61316640  | C11orf10  | UTR5        |                                                                                      | - | TtoG | 0.1538 | 0.2    | 2  | 2  | [11,13] |
| chr11:64621101  | C11orf2   | coding_exon | ENST00000279281:RtoQ;                                                                | + | GtoA | 0.1163 | 0.1667 | 3  | 2  | [12,43] |
| chr11:64635749  | C11orf2   | UTR3        |                                                                                      | + | GtoA | 0.1333 | 0.2308 | 2  | 2  | [13,15] |
| chr11:30309380  | C11orf46  | coding_exon |                                                                                      | + | TtoA | 0.1    | 0.1    | 2  | 2  | [10,10] |
| chr11:62191574  | C11orf48  | coding_exon | ENST00000354588:EtoK;ENST00000415855:EtoK;ENST00000431002:EtoK;                      | - | GtoA | 0.1538 | 0.7273 | 9  | 9  | [10,21] |
| chr11:62191572  | C11orf48  | coding_exon | ENST00000354588:EtoD;ENST00000415855:EtoD;ENST00000431002:EtoD;                      | - | GtoC | 0.2857 | 0.9231 | 17 | 17 | [11,34] |
| chr11:62189698  | C11orf48  | coding_exon |                                                                                      | - | AtoG | 0.1    | 0.1818 | 3  | 3  | [10,11] |
| chr11:47140236  | C11orf49  | mixed       |                                                                                      | + | AtoC | 0.1429 | 0.1667 | 6  | 2  | [18,21] |
| chr11:71499978  | C11orf51  | UTR5        |                                                                                      | - | TtoC | 0.1154 | 0.1613 | 9  | 3  | [19,31] |
| chr11:71499980  | C11orf51  | UTR5        |                                                                                      | - | TtoG | 0.125  | 0.1875 | 5  | 2  | [16,32] |
| chr11:111456396 | C11orf57  | coding_exon | ENST00000280352:PtoQ;ENST00000393047:PtoQ;ENST00000393048:PtoQ;ENST00000393048:PtoQ; | + | CtoA | 0.1    | 0.15   | 2  | 2  | [10,20] |
| chr11:111460047 | C11orf57  | UTR3        |                                                                                      | + | GtoA | 0.1    | 0.1    | 3  | 3  | [10,10] |
| chr11:65440908  | C11orf68  | UTR3        |                                                                                      | - | TtoC | 0.1    | 0.1333 | 5  | 3  | [15,20] |
| chr11:60970353  | C11orf79  | UTR3        |                                                                                      | + | GtoT | 0.1    | 0.1    | 2  | 2  | [10,20] |
| chr12:151987184 | C12orf10  | coding_exon | ENST00000267103:LtoP;                                                                | + | TtoC | 0.1    | 0.1    | 4  | 2  | [10,20] |
| chr12:105891276 | C12orf23  | UTR3        |                                                                                      | + | TtoC | 0.1    | 0.1304 | 4  | 2  | [10,23] |
| chr12:109410051 | C12orf24  | coding_exon | ENST00000377673:Itok;                                                                | + | TtoA | 0.1    | 0.1    | 8  | 2  | [10,11] |
| chr12:109412386 | C12orf24  | UTR3        |                                                                                      | + | TtoC | 0.1    | 0.1    | 2  | 2  | [10,10] |
| chr12:110969949 | C12orf30  | coding_exon | ENST00000261745:StoP;ENST00000412551:StoP;                                           | - | TtoC | 0.1    | 0.1    | 3  | 2  | [10,10] |
| chr12:110950603 | C12orf30  | UTR3        |                                                                                      | - | TtoC | 0.1538 | 0.1818 | 3  | 2  | [11,13] |
| chr12:2864799   | C12orf32  | coding_exon |                                                                                      | + | TtoC | 0.1    | 0.1053 | 7  | 2  | [10,19] |
| chr12:2867463   | C12orf32  | coding_exon |                                                                                      | + | TtoC | 0.1071 | 0.1364 | 7  | 2  | [22,28] |
| chr12:2867892   | C12orf32  | UTR3        |                                                                                      | + | AtoG | 0.125  | 0.1667 | 6  | 2  | [12,16] |
| chr12:2868384   | C12orf32  | UTR3        |                                                                                      | + | AtoC | 0.1    | 0.1    | 3  | 2  | [10,10] |
| chr12:2868700   | C12orf32  | UTR3        |                                                                                      | + | GtoA | 0.1    | 0.1176 | 4  | 2  | [17,20] |
| chr12:32036633  | C12orf35  | coding_exon | ENST00000312561:MtoR;ENST00000381054:MtoR;                                           | + | TtoG | 0.1    | 0.1538 | 3  | 2  | [10,13] |
| chr12:47361581  | C12orf41  | mixed       |                                                                                      | - | AtoG | 0.1    | 0.1    | 2  | 2  | [10,10] |
| chr12:47333584  | C12orf41  | UTR3        |                                                                                      | - | TtoG | 0.1    | 0.1111 | 3  | 3  | [10,20] |
| chr12:119926147 | C12orf43  | UTR3        |                                                                                      | - | TtoG | 0.1    | 0.1111 | 2  | 2  | [10,10] |
| chr12:119926151 | C12orf43  | UTR3        |                                                                                      | - | AtoG | 0.2308 | 0.25   | 2  | 2  | [12,13] |
| chr12:119926152 | C12orf43  | UTR3        |                                                                                      | - | TtoG | 0.1538 | 0.3077 | 3  | 3  | [12,13] |
| chr12:50757244  | C12orf44  | UTR3        |                                                                                      | + | GtoC | 0.1    | 0.1111 | 2  | 2  | [10,18] |
| chr12:103912600 | C12orf45  | coding_exon | ENST00000280749:KtoR;                                                                | + | AtoG | 0.1    | 0.3077 | 4  | 3  | [10,20] |
| chr12:103912585 | C12orf45  | coding_exon | ENST00000280749:AtoE;                                                                | + | CtoA | 0.125  | 0.1765 | 8  | 3  | [13,17] |
| chr12:103912586 | C12orf45  | coding_exon |                                                                                      | + | AtoG | 0.1034 | 0.1667 | 9  | 3  | [12,29] |
| chr12:102869249 | C12orf73  | UTR3        |                                                                                      | - | AtoG | 0.1    | 0.1667 | 2  | 2  | [10,19] |
| chr13:38485502  | C13orf23  | coding_exon |                                                                                      | - | TtoG | 0.1429 | 0.1667 | 2  | 2  | [12,14] |
| chr13:38482997  | C13orf23  | UTR3        |                                                                                      | - | AtoG | 0.1    | 0.1818 | 2  | 2  | [10,11] |
| chr13:20626234  | C13orf3   | UTR3        |                                                                                      | - | TtoA | 0.1    | 0.1111 | 3  | 2  | [10,18] |
| chr13:20648659  | C13orf3   | UTR5        |                                                                                      | - | TtoG | 0.1429 | 0.1538 | 2  | 2  | [13,14] |

|                 |           |             |                                                                                     |   |      |        |        |    |    |          |
|-----------------|-----------|-------------|-------------------------------------------------------------------------------------|---|------|--------|--------|----|----|----------|
| chr14:89854159  | C14orf102 | mixed       |                                                                                     | - | TtoC | 0.1    | 0.1111 | 3  | 2  | [10,10]  |
| chr14:75707996  | C14orf118 | coding_exon | ENST00000261530:VtoA;ENST00000312858:VtoA;ENST00000336993:VtoA;ENST00000336993:VtoA | + | TtoC | 0.1    | 0.1    | 3  | 2  | [10,10]  |
| chr14:22637270  | C14orf119 | mixed       |                                                                                     | + | AtoG | 0.1    | 0.1579 | 14 | 4  | [17,33]  |
| chr14:22637521  | C14orf119 | mixed       |                                                                                     | + | TtoC | 0.1154 | 0.1154 | 5  | 2  | [26,26]  |
| chr14:22637526  | C14orf119 | mixed       |                                                                                     | + | TtoA | 0.1053 | 0.1364 | 4  | 2  | [19,22]  |
| chr14:76980404  | C14orf133 | coding_exon | ENST00000327028:DtoV;ENST00000343765:DtoV;ENST00000445370:DtoV;ENST00000343765:DtoV | - | GtoT | 0.1    | 0.1111 | 2  | 2  | [10,10]  |
| chr14:59681376  | C14orf135 | coding_exon |                                                                                     | + | AtoT | 0.1    | 0.1667 | 3  | 2  | [10,12]  |
| chr14:59628665  | C14orf135 | UTR5        |                                                                                     | + | TtoG | 0.1    | 0.1    | 2  | 2  | [10,10]  |
| chr14:92739805  | C14orf142 | coding_exon | ENST00000306954:RtoQ;                                                               | - | GtoA | 0.1    | 0.1    | 2  | 2  | [10,10]  |
| chr14:89467672  | C14orf143 | coding_exon | ENST00000316738:KtoE;                                                               | - | AtoG | 0.1    | 0.1    | 2  | 2  | [10,10]  |
| chr14:103223300 | C14orf153 | coding_exon | ENST00000246489:GtoS;ENST00000334553:GtoS;ENST00000347839:GtoS;                     | + | GtoA | 0.1053 | 0.1429 | 6  | 2  | [19,21]  |
| chr14:103107859 | C14orf153 | coding_exon |                                                                                     | + | AtoT | 0.1    | 0.1    | 6  | 3  | [10,10]  |
| chr14:103235225 | C14orf153 | coding_exon |                                                                                     | + | CtoG | 0.1    | 0.1429 | 3  | 2  | [10,14]  |
| chr14:103126619 | C14orf153 | mixed       |                                                                                     | + | GtoA | 0.1    | 0.2    | 6  | 4  | [10,12]  |
| chr14:103221730 | C14orf153 | mixed       |                                                                                     | + | CtoG | 0.1    | 0.1333 | 10 | 2  | [30,30]  |
| chr14:90725199  | C14orf159 | coding_exon | ENST00000256324:VtoA;ENST00000321157:VtoA;ENST00000336843:VtoA;ENST00000336843:VtoA | + | TtoC | 0.1    | 0.1333 | 7  | 2  | [10,15]  |
| chr14:90732562  | C14orf159 | coding_exon | ENST00000256324:QtoR;ENST00000321157:QtoR;ENST00000336843:QtoR;ENST00000336843:QtoR | + | AtoG | 0.1    | 0.1429 | 2  | 2  | [10,14]  |
| chr14:90706147  | C14orf159 | coding_exon | ENST00000256324:GtoV;ENST00000321157:GtoV;ENST00000336843:GtoV;ENST00000336843:GtoV | + | GtoT | 0.1    | 0.1    | 2  | 2  | [10,10]  |
| chr14:90712031  | C14orf159 | coding_exon | ENST00000256324:GtoV;ENST00000321157:GtoV;ENST00000336843:GtoV;ENST00000336843:GtoV | + | AtoG | 0.1    | 0.1818 | 2  | 2  | [10,11]  |
| chr14:75595465  | C14orf179 | coding_exon |                                                                                     | + | AtoG | 0.1    | 0.1    | 2  | 2  | [10,10]  |
| chr14:103448386 | C14orf2   | UTR3        |                                                                                     | - | TtoC | 0.1333 | 0.1333 | 3  | 2  | [15,15]  |
| chr14:103448604 | C14orf2   | UTR3        |                                                                                     | - | TtoA | 0.1087 | 0.1167 | 5  | 3  | [50,61]  |
| chr14:103448606 | C14orf2   | UTR3        |                                                                                     | - | AtoG | 0.1111 | 0.1231 | 9  | 2  | [38,67]  |
| chr14:23844240  | C14orf21  | UTR3        |                                                                                     | + | TtoC | 0.1    | 0.1    | 5  | 2  | [10,10]  |
| chr14:23844640  | C14orf21  | UTR3        |                                                                                     | + | TtoC | 0.1    | 0.1538 | 4  | 2  | [20,26]  |
| chr14:76564279  | C14orf4   | mixed       |                                                                                     | - | AtoC | 0.1    | 0.1429 | 2  | 2  | [10,21]  |
| chr14:73603336  | C14orf45  | mixed       |                                                                                     | + | TtoC | 0.1    | 0.1    | 2  | 2  | [10,10]  |
| chr14:105026168 | C14orf80  | mixed       |                                                                                     | + | AtoC | 0.1042 | 0.1129 | 5  | 2  | [52,68]  |
| chr14:105026169 | C14orf80  | mixed       |                                                                                     | + | AtoG | 0.1538 | 0.1556 | 4  | 2  | [14,45]  |
| chr15:72981460  | C15orf17  | UTR3        |                                                                                     | - | CtoA | 0.1    | 0.1818 | 10 | 4  | [10,17]  |
| chr15:72981461  | C15orf17  | UTR3        |                                                                                     | - | TtoC | 0.2    | 0.2    | 7  | 2  | [10,15]  |
| chr15:72981995  | C15orf17  | UTR3        |                                                                                     | - | GtoT | 0.1818 | 0.2667 | 8  | 6  | [10,16]  |
| chr15:73290916  | C15orf39  | UTR3        |                                                                                     | + | TtoA | 0.1111 | 0.1364 | 5  | 2  | [18,22]  |
| chr15:87971903  | C15orf42  | UTR3        |                                                                                     | + | TtoA | 0.1    | 0.125  | 2  | 2  | [10,16]  |
| chr15:63658296  | C15orf44  | UTR3        |                                                                                     | - | TtoC | 0.1    | 0.2    | 7  | 3  | [10,21]  |
| chr16:1353257   | C16orf28  | UTR3        |                                                                                     | - | TtoG | 0.1    | 0.1    | 2  | 2  | [10,10]  |
| chr16:76663     | C16orf35  | UTR3        |                                                                                     | - | GtoT | 0.1    | 0.1333 | 4  | 2  | [15,20]  |
| chr16:76664     | C16orf35  | UTR3        |                                                                                     | - | GtoT | 0.1    | 0.1176 | 3  | 2  | [10,17]  |
| chr16:66254824  | C16orf48  | coding_exon | ENST00000243878:StoG;ENST00000414445:StoG;                                          | - | AtoG | 0.1    | 0.1429 | 2  | 2  | [10,14]  |
| chr16:66255097  | C16orf48  | coding_exon | ENST00000243878:HtoR;ENST00000414445:HtoR;                                          | - | AtoG | 0.1    | 0.1    | 3  | 2  | [10,10]  |
| chr16:79588420  | C16orf61  | coding_exon | ENST00000219400:NtoK;                                                               | - | TtoG | 0.1429 | 0.16   | 9  | 2  | [14,25]  |
| chr16:19535543  | C16orf62  | mixed       |                                                                                     | + | TtoG | 0.1    | 0.1538 | 3  | 2  | [10,13]  |
| chr16:15867132  | C16orf63  | UTR3        |                                                                                     | - | TtoC | 0.1667 | 0.1875 | 5  | 2  | [16,18]  |
| chr16:15867935  | C16orf63  | UTR3        |                                                                                     | - | TtoC | 0.1    | 0.1818 | 4  | 2  | [10,11]  |
| chr16:8627111   | C16orf68  | coding_exon | ENST00000163678:NtoD;ENST00000381920:NtoD;                                          | + | AtoG | 0.1    | 0.1    | 2  | 2  | [10,10]  |
| chr16:65711576  | C16orf70  | coding_exon | ENST00000219139:VtoA;                                                               | + | TtoC | 0.1667 | 0.1818 | 2  | 2  | [11,12]  |
| chr16:11352244  | C16orf75  | UTR3        |                                                                                     | + | TtoA | 0.1    | 0.1    | 2  | 2  | [10,10]  |
| chr16:11352284  | C16orf75  | UTR3        |                                                                                     | + | AtoT | 0.1    | 0.1818 | 2  | 2  | [10,11]  |
| chr16:56707516  | C16orf80  | coding_exon | ENST00000262498:LtoP;                                                               | - | TtoC | 0.1    | 0.1429 | 4  | 2  | [11,15]  |
| chr16:87306587  | C16orf84  | coding_exon |                                                                                     | + | CtoT | 0.1    | 0.4583 | 2  | 2  | [10,24]  |
| chr16:45394058  | C16orf87  | UTR3        |                                                                                     | - | TtoC | 0.1    | 0.1    | 2  | 2  | [10,10]  |
| chr16:19625740  | C16orf88  | coding_exon | ENST00000219837:GtoG;ENST00000420899:GtoG;                                          | - | AtoG | 0.1176 | 0.1333 | 2  | 2  | [15,17]  |
| chr16:1410021   | C16orf91  | mixed       |                                                                                     | - | AtoG | 0.1111 | 0.1429 | 4  | 2  | [18,22]  |
| chr17:77945572  | C17orf101 | coding_exon |                                                                                     | - | TtoC | 0.1    | 0.1    | 3  | 2  | [10,10]  |
| chr17:26250461  | C17orf42  | coding_exon | ENST00000306409:DtoG;                                                               | - | AtoG | 0.1    | 0.1667 | 3  | 2  | [10,12]  |
| chr17:16285584  | C17orf45  | UTR3        |                                                                                     | + | TtoC | 0.1    | 0.1161 | 14 | 3  | [61,187] |
| chr17:16285958  | C17orf45  | UTR3        |                                                                                     | + | CtoG | 0.3973 | 0.8087 | 8  | 8  | [80,377] |
| chr17:16286054  | C17orf45  | UTR3        |                                                                                     | + | TtoC | 0.1    | 0.25   | 16 | 13 | [14,258] |
| chr17:10550595  | C17orf48  | coding_exon |                                                                                     | + | GtoC | 0.1    | 0.1    | 3  | 2  | [10,10]  |
| chr17:39581919  | C17orf53  | coding_exon | ENST00000245382:QtoK;ENST00000319977:QtoK;                                          | + | CtoA | 0.1    | 0.1818 | 3  | 2  | [10,11]  |
| chr17:39590756  | C17orf53  | coding_exon |                                                                                     | + | TtoA | 0.1    | 0.1    | 2  | 2  | [10,10]  |
| chr17:39595170  | C17orf53  | UTR3        |                                                                                     | + | TtoC | 0.1111 | 0.1176 | 4  | 2  | [10,17]  |
| chr17:7247024   | C17orf61  | UTR3        |                                                                                     | - | AtoG | 0.1    | 0.3125 | 5  | 4  | [10,16]  |
| chr17:8081538   | C17orf68  | coding_exon |                                                                                     | - | AtoC | 0.1    | 0.1    | 2  | 2  | [10,10]  |
| chr17:8072554   | C17orf68  | mixed       |                                                                                     | - | TtoC | 0.1111 | 0.1333 | 5  | 3  | [15,18]  |
| chr17:8072847   | C17orf68  | mixed       |                                                                                     | - | TtoC | 0.1    | 0.1    | 3  | 2  | [10,10]  |
| chr17:8071883   | C17orf68  | UTR3        |                                                                                     | - | AtoG | 0.1    | 0.1    | 2  | 2  | [10,10]  |
| chr17:8071991   | C17orf68  | UTR3        |                                                                                     | - | TtoA | 0.1    | 0.1538 | 2  | 2  | [10,13]  |
| chr17:8072117   | C17orf68  | UTR3        |                                                                                     | - | TtoG | 0.1    | 0.1    | 5  | 2  | [10,10]  |
| chr17:77128089  | C17orf70  | coding_exon | ENST00000327787:GtoD;                                                               | - | GtoT | 0.1    | 0.1111 | 2  | 2  | [10,18]  |
| chr17:77117583  | C17orf70  | UTR3        |                                                                                     | - | GtoC | 0.2353 | 0.2778 | 2  | 2  | [17,19]  |
| chr17:54645631  | C17orf71  | coding_exon | ENST00000300917:LtoI;                                                               | + | TtoA | 0.1    | 0.1    | 4  | 2  | [10,10]  |
| chr17:27689088  | C17orf75  | coding_exon | ENST00000225805:TtoP;                                                               | - | AtoC | 1      | 1      | 2  | 2  | [17,19]  |
| chr17:27689412  | C17orf75  | coding_exon | ENST00000225805:TtoK;                                                               | - | CtoA | 0.1    | 0.1    | 2  | 2  | [10,10]  |
| chr17:27689087  | C17orf75  | coding_exon | ENST00000225805:TtoI;                                                               | - | CtoT | 0.9167 | 1      | 4  | 4  | [10,17]  |
| chr17:7100906   | C17orf81  | coding_exon | ENST00000354429:StoT;ENST00000356683:StoT;ENST00000396627:StoT;ENST00000396627:StoT | + | GtoC | 0.1569 | 0.6    | 5  | 3  | [10,51]  |
| chr17:7100904   | C17orf81  | coding_exon | ENST00000354429:DtoE;ENST00000356683:DtoE;ENST00000396627:DtoE;ENST00000396627:DtoE | + | CtoG | 0.1622 | 0.5833 | 12 | 5  | [12,55]  |
| chr17:72600965  | C17orf86  | mixed       |                                                                                     | + | TtoC | 0.1    | 0.2    | 3  | 2  | [10,10]  |
| chr17:5053058   | C17orf87  | mixed       |                                                                                     | - | AtoG | 0.1    | 0.1    | 3  | 2  | [10,10]  |
| chr17:76829673  | C17orf89  | UTR3        |                                                                                     | + | TtoC | 0.1389 | 0.1429 | 5  | 2  | [35,36]  |
| chr17:76829675  | C17orf89  | UTR3        |                                                                                     | + | CtoA | 0.1    | 0.3636 | 9  | 5  | [10,16]  |
| chr17:34083024  | C17orf96  | mixed       |                                                                                     | - | TtoG | 0.1538 | 0.2    | 4  | 2  | [13,16]  |
| chr18:32662818  | C18orf10  | UTR5        |                                                                                     | - | TtoA | 0.1    | 0.1429 | 2  | 2  | [10,14]  |
| chr18:13672014  | C18orf19  | coding_exon | ENST00000322247:HtoQ;ENST00000402563:HtoQ;ENST00000457610:HtoQ;                     | - | TtoA | 0.1    | 0.1429 | 3  | 2  | [10,14]  |
| chr18:31809042  | C18orf21  | coding_exon | ENST00000269194:StoP;ENST00000333234:StoP;                                          | + | TtoC | 0.1053 | 0.1111 | 2  | 2  | [10,19]  |
| chr18:46171502  | C18orf24  | coding_exon | ENST00000285116:StoP;ENST00000398452:StoP;ENST00000417656:StoP;                     | + | TtoC | 0.15   | 0.1875 | 3  | 2  | [17,20]  |
| chr18:42097053  | C18orf25  | coding_exon | ENST00000282059:DtoN;ENST00000321319:DtoN;                                          | + | GtoA | 0.1    | 0.1    | 3  | 2  | [10,10]  |
| chr18:42100679  | C18orf25  | UTR3        |                                                                                     | + | TtoC | 0.1    | 0.1538 | 3  | 2  | [10,13]  |
| chr18:45262205  | C18orf32  | UTR3        |                                                                                     | - | TtoC | 0.125  | 0.129  | 6  | 3  | [16,31]  |
| chr18:69967078  | C18orf55  | coding_exon | ENST00000169551:StoP;                                                               | + | TtoC | 0.1176 | 0.1875 | 4  | 2  | [16,17]  |
| chr19:4608604   | C19orf10  | UTR3        |                                                                                     | - | GtoT | 0.1    | 0.1304 | 4  | 2  | [10,23]  |
| chr19:4608606   | C19orf10  | UTR3        |                                                                                     | - | GtoT | 0.1053 | 0.1333 | 3  | 2  | [15,19]  |
| chr19:34885578  | C19orf12  | coding_exon | ENST00000323670:DtoN;ENST00000392278:DtoN;                                          | - | GtoA | 0.1    | 0.1    | 3  | 2  | [10,10]  |
| chr19:34884885  | C19orf12  | UTR3        |                                                                                     | - | AtoG | 0.1111 | 0.1765 | 4  | 2  | [17,27]  |
| chr19:847508    | C19orf22  | UTR3        |                                                                                     | - | TtoC | 0.1667 | 0.2    | 3  | 2  | [10,12]  |
| chr19:1425170   | C19orf25  | UTR3        |                                                                                     | - | TtoA | 0.1    | 0.1    | 3  | 2  | [10,10]  |

|                |           |             |                                                                                      |   |      |        |        |    |    |          |
|----------------|-----------|-------------|--------------------------------------------------------------------------------------|---|------|--------|--------|----|----|----------|
| chr19:3574708  | C19orf29  | coding_exon | ENST00000221899:LtoR;ENST00000248420:LtoR;ENST00000429344:LtoR;                      | - | TtoG | 0.1    | 0.1    | 4  | 2  | [10,10]  |
| chr19:3561928  | C19orf29  | mixed       |                                                                                      | - | TtoC | 1      | 1      | 6  | 6  | [10,30]  |
| chr19:2049800  | C19orf36  | coding_exon | ENST00000300960:MtoK;ENST00000395301:MtoK;ENST00000395307:MtoK;                      | + | TtoA | 0.1818 | 0.2143 | 4  | 3  | [11,15]  |
| chr19:2049801  | C19orf36  | coding_exon | ENST00000300960:MtoL;ENST00000395301:MtoL;ENST00000395307:MtoL;                      | + | GtoC | 0.1    | 0.2667 | 7  | 4  | [10,19]  |
| chr19:2049449  | C19orf36  | coding_exon | ENST00000300960:KtoR;ENST00000395301:KtoR;ENST00000395307:KtoR;                      | + | AtoG | 0.25   | 0.3333 | 3  | 2  | [12,18]  |
| chr19:16618378 | C19orf42  | UTR3        |                                                                                      | - | TtoA | 0.1    | 0.1    | 3  | 2  | [10,10]  |
| chr19:16618710 | C19orf42  | UTR3        |                                                                                      | - | AtoC | 0.1    | 0.1818 | 3  | 2  | [10,11]  |
| chr19:45526202 | C19orf47  | coding_exon | ENST00000357884:TtoA;ENST00000392035:TtoA;                                           | - | AtoG | 0.1176 | 0.2    | 2  | 2  | [10,17]  |
| chr19:13750274 | C19orf53  | UTR3        |                                                                                      | + | TtoC | 0.1667 | 0.2    | 2  | 2  | [10,12]  |
| chr19:13750276 | C19orf53  | UTR3        |                                                                                      | + | CtoA | 0.122  | 0.3636 | 3  | 2  | [12,42]  |
| chr19:45939634 | C19orf54  | UTR3        |                                                                                      | - | CtoA | 0.1    | 0.1429 | 3  | 2  | [10,14]  |
| chr19:18561294 | C19orf60  | coding_exon | ENST00000358607:HtoP;ENST00000397217:HtoP;ENST00000450195:HtoP;                      | + | AtoC | 0.1176 | 0.1515 | 2  | 2  | [33,34]  |
| chr19:55678411 | C19orf63  | UTR3        |                                                                                      | + | TtoC | 0.1176 | 0.1852 | 3  | 2  | [17,28]  |
| chr19:55678415 | C19orf63  | UTR3        |                                                                                      | + | CtoA | 0.1176 | 0.1538 | 5  | 3  | [13,17]  |
| chr2:68123546  | C1D       | coding_exon | ENST00000355848:NtoK;ENST0000047324:NtoK;ENST00000409302:NtoK;ENST00000409302:NtoK;  | - | TtoA | 0.1    | 0.125  | 2  | 2  | [10,16]  |
| chr2:68127938  | C1D       | coding_exon |                                                                                      | - | TtoG | 0.1364 | 0.2    | 9  | 4  | [10,29]  |
| chr1:199134141 | C1orf106  | mixed       |                                                                                      | + | AtoG | 0.1    | 0.125  | 3  | 2  | [16,20]  |
| chr1:37921119  | C1orf109  | UTR3        |                                                                                      | - | AtoG | 0.1    | 0.1818 | 3  | 2  | [10,12]  |
| chr1:167944268 | C1orf112  | mixed       |                                                                                      | + | AtoG | 0.1    | 0.1053 | 4  | 2  | [10,19]  |
| chr1:168068196 | C1orf112  | mixed       |                                                                                      | + | TtoG | 0.1    | 0.1    | 3  | 2  | [10,10]  |
| chr1:168085352 | C1orf112  | mixed       |                                                                                      | + | TtoA | 0.1    | 0.2    | 2  | 2  | [10,10]  |
| chr1:16809324  | C1orf112  | UTR3        |                                                                                      | + | TtoG | 0.1    | 0.1    | 2  | 2  | [10,10]  |
| chr1:36558814  | C1orf113  | coding_exon | ENST00000312808:QtoK;ENST00000426732:QtoK;ENST00000453908:QtoK;                      | + | CtoA | 0.1    | 0.1053 | 3  | 3  | [10,19]  |
| chr1:36557633  | C1orf113  | mixed       |                                                                                      | + | CtoA | 0.1333 | 0.1429 | 2  | 2  | [14,15]  |
| chr1:23984835  | C1orf128  | coding_exon | ENST00000246151:GtoE;ENST00000374524:GtoE;                                           | + | GtoA | 0.1111 | 0.1765 | 3  | 2  | [17,19]  |
| chr1:23984836  | C1orf128  | coding_exon |                                                                                      | + | AtoT | 0.1111 | 0.1765 | 3  | 2  | [17,18]  |
| chr1:23986554  | C1orf128  | UTR3        |                                                                                      | + | AtoC | 0.1    | 0.1739 | 4  | 2  | [20,25]  |
| chr1:229441353 | C1orf131  | coding_exon | ENST00000318906:GtoV;ENST00000366648:GtoV;ENST00000366649:GtoV;ENST00000366649:GtoV; | - | GtoT | 0.1    | 0.1    | 2  | 2  | [10,10]  |
| chr1:37732130  | C1orf149  | mixed       |                                                                                      | - | GtoT | 0.1    | 0.1    | 2  | 2  | [10,10]  |
| chr1:37731574  | C1orf149  | UTR3        |                                                                                      | - | AtoC | 0.1    | 0.1    | 3  | 2  | [10,10]  |
| chr1:37731875  | C1orf149  | UTR3        |                                                                                      | - | TtoC | 0.1333 | 0.2    | 4  | 2  | [10,15]  |
| chr1:19825680  | C1orf151  | UTR3        |                                                                                      | + | TtoC | 0.1    | 0.1818 | 12 | 7  | [12,36]  |
| chr1:19825683  | C1orf151  | UTR3        |                                                                                      | + | TtoC | 0.1351 | 0.3333 | 13 | 4  | [14,37]  |
| chr1:1007113   | C1orf159  | UTR3        |                                                                                      | - | GtoA | 0.1    | 0.2    | 2  | 2  | [10,10]  |
| chr1:3795711   | C1orf174  | UTR3        |                                                                                      | - | AtoG | 0.1429 | 0.3    | 5  | 2  | [11,14]  |
| chr1:54980176  | C1orf175  | mixed       |                                                                                      | + | AtoC | 0.2    | 0.2    | 3  | 2  | [10,10]  |
| chr1:243083617 | C1orf199  | mixed       |                                                                                      | - | TtoG | 0.1    | 0.1176 | 7  | 3  | [18,30]  |
| chr1:35952436  | C1orf216  | mixed       |                                                                                      | - | GtoA | 0.1    | 0.1    | 2  | 2  | [10,20]  |
| chr1:35952638  | C1orf216  | mixed       |                                                                                      | - | CtoA | 0.1    | 0.1    | 2  | 2  | [10,10]  |
| chr1:28085699  | C1orf38   | UTR3        |                                                                                      | + | TtoC | 0.1    | 0.1    | 4  | 2  | [20,30]  |
| chr1:152445866 | C1orf43   | UTR3        |                                                                                      | - | TtoC | 0.1471 | 0.1765 | 4  | 2  | [17,141] |
| chr1:148515664 | C1orf54   | coding_exon |                                                                                      | + | TtoG | 0.1111 | 0.1333 | 4  | 4  | [15,27]  |
| chr1:224238001 | C1orf55   | UTR3        |                                                                                      | - | AtoG | 0.1    | 0.2    | 2  | 2  | [10,10]  |
| chr1:25441444  | C1orf63   | UTR3        |                                                                                      | - | TtoA | 0.1034 | 0.1429 | 5  | 2  | [14,29]  |
| chr1:25441492  | C1orf63   | UTR3        |                                                                                      | - | GtoA | 0.1    | 0.1111 | 8  | 3  | [20,80]  |
| chr1:25441498  | C1orf63   | UTR3        |                                                                                      | - | CtoA | 0.1176 | 0.125  | 2  | 2  | [16,17]  |
| chr1:244877424 | C1orf71   | coding_exon | ENST00000366512:PtoL;ENST00000366513:PtoL;                                           | + | CtoT | 0.1    | 0.1    | 2  | 2  | [10,10]  |
| chr1:244896879 | C1orf71   | UTR3        |                                                                                      | + | TtoC | 0.1    | 0.1    | 2  | 2  | [10,10]  |
| chr1:244897983 | C1orf71   | UTR3        |                                                                                      | + | TtoC | 0.1176 | 0.1667 | 3  | 2  | [12,17]  |
| chr1:244897988 | C1orf71   | UTR3        |                                                                                      | + | AtoG | 0.1    | 0.1667 | 3  | 2  | [10,12]  |
| chr12:7140279  | C1RL      | coding_exon | ENST00000266512:StoR;                                                                | - | CtoA | 0.1    | 0.1    | 2  | 2  | [10,10]  |
| chr20:42131274 | C20orf100 | UTR3        |                                                                                      | + | AtoG | 0.1    | 0.1818 | 6  | 4  | [11,20]  |
| chr20:54527335 | C20orf106 | mixed       |                                                                                      | + | TtoC | 0.1    | 0.125  | 6  | 3  | [10,17]  |
| chr20:61047300 | C20orf11  | mixed       |                                                                                      | + | CtoA | 0.1111 | 0.2308 | 5  | 2  | [13,18]  |
| chr20:61047379 | C20orf11  | mixed       |                                                                                      | + | CtoA | 0.1111 | 0.1667 | 2  | 2  | [10,12]  |
| chr20:42259550 | C20orf111 | coding_exon |                                                                                      | - | AtoG | 0.12   | 0.1667 | 6  | 2  | [12,25]  |
| chr20:57954386 | C20orf177 | coding_exon | ENST00000358293:TtoP;ENST00000360816:TtoP;                                           | + | AtoC | 0.1    | 0.1    | 2  | 2  | [10,10]  |
| chr20:47339172 | C20orf199 | mixed       |                                                                                      | + | TtoC | 0.1034 | 0.1923 | 14 | 6  | [26,72]  |
| chr20:47339175 | C20orf199 | mixed       |                                                                                      | + | AtoG | 0.1429 | 0.2727 | 11 | 4  | [11,20]  |
| chr20:47339176 | C20orf199 | mixed       |                                                                                      | + | TtoA | 0.1429 | 0.3913 | 4  | 4  | [10,25]  |
| chr20:47339177 | C20orf199 | mixed       |                                                                                      | + | AtoG | 0.1    | 0.1429 | 2  | 2  | [10,21]  |
| chr20:3682184  | C20orf27  | UTR3        |                                                                                      | - | TtoA | 0.1    | 0.1316 | 5  | 2  | [10,39]  |
| chr20:3752803  | C20orf29  | mixed       |                                                                                      | + | GtoA | 0.1    | 0.1    | 2  | 2  | [10,10]  |
| chr20:24902342 | C20orf3   | coding_exon |                                                                                      | - | GtoA | 0.1053 | 0.1429 | 5  | 2  | [14,19]  |
| chr20:24892549 | C20orf3   | mixed       |                                                                                      | - | TtoC | 0.1    | 0.12   | 3  | 2  | [20,26]  |
| chr20:13730286 | C20orf7   | coding_exon | ENST00000378106:LtoP;ENST00000463598:LtoP;                                           | + | TtoC | 0.1    | 0.1818 | 4  | 2  | [10,11]  |
| chr21:44581974 | C21orf2   | coding_exon | ENST00000325223:StoC;ENST00000339818:StoC;ENST00000397956:StoC;                      | - | AtoT | 0.1    | 0.1    | 2  | 2  | [10,10]  |
| chr21:44576418 | C21orf2   | coding_exon |                                                                                      | - | TtoG | 0.1    | 0.1    | 2  | 2  | [10,11]  |
| chr21:44378091 | C21orf33  | coding_exon |                                                                                      | + | TtoC | 0.125  | 0.1429 | 2  | 2  | [16,29]  |
| chr21:44389598 | C21orf33  | UTR3        |                                                                                      | + | AtoT | 0.102  | 0.1471 | 2  | 2  | [34,49]  |
| chr21:44389794 | C21orf33  | UTR3        |                                                                                      | + | AtoC | 0.119  | 0.1818 | 7  | 3  | [41,44]  |
| chr21:44390017 | C21orf33  | UTR3        |                                                                                      | + | TtoG | 0.1333 | 0.2727 | 2  | 2  | [12,49]  |
| chr21:32563972 | C21orf45  | coding_exon | ENST00000290130:StoP;                                                                | - | TtoC | 0.1    | 0.2143 | 4  | 3  | [10,14]  |
| chr21:34679753 | C21orf51  | coding_exon |                                                                                      | + | AtoG | 0.1667 | 0.1667 | 4  | 2  | [12,12]  |
| chr21:46546912 | C21orf58  | mixed       |                                                                                      | - | TtoC | 0.1667 | 0.3    | 4  | 2  | [10,12]  |
| chr21:46561581 | C21orf58  | mixed       |                                                                                      | - | AtoT | 0.1    | 0.1    | 4  | 2  | [10,10]  |
| chr21:33053449 | C21orf66  | coding_exon | ENST00000290178:Lto*;ENST00000331923:Lto*;ENST00000342419:Lto*;                      | - | TtoA | 0.1    | 0.1    | 2  | 2  | [10,10]  |
| chr21:33053264 | C21orf66  | coding_exon | ENST00000290178:KtoQ;ENST00000331923:KtoQ;ENST00000342419:KtoQ;                      | - | AtoC | 0.1    | 0.3077 | 3  | 2  | [10,13]  |
| chr21:45177759 | C21orf67  | UTR3        |                                                                                      | - | CtoT | 0.1    | 0.1    | 3  | 2  | [10,10]  |
| chr21:29469010 | C21orf7   | mixed       |                                                                                      | + | TtoC | 0.1    | 0.1818 | 2  | 2  | [10,11]  |
| chr21:18087601 | C21orf91  | UTR3        |                                                                                      | - | CtoA | 0.1176 | 0.125  | 2  | 2  | [16,17]  |
| chr22:31125746 | C22orf28  | coding_exon | ENST00000442204:RtoG;                                                                | - | AtoG | 0.1    | 0.1    | 2  | 2  | [10,10]  |
| chr22:30408251 | C22orf30  | mixed       |                                                                                      | - | GtoA | 0.1    | 0.2    | 3  | 2  | [10,10]  |
| chr22:30408326 | C22orf30  | mixed       |                                                                                      | - | AtoG | 0.1    | 0.1333 | 6  | 2  | [10,15]  |
| chr22:30408445 | C22orf30  | mixed       |                                                                                      | - | TtoC | 0.1    | 0.25   | 3  | 2  | [10,12]  |
| chr22:30408542 | C22orf30  | mixed       |                                                                                      | - | TtoC | 0.1    | 0.1    | 2  | 2  | [10,10]  |
| chr22:30408588 | C22orf30  | mixed       |                                                                                      | - | GtoT | 0.1    | 0.2    | 3  | 3  | [10,10]  |
| chr22:30408589 | C22orf30  | mixed       |                                                                                      | - | TtoG | 0.1    | 0.1    | 2  | 2  | [10,10]  |
| chr22:30409345 | C22orf30  | mixed       |                                                                                      | - | CtoA | 0.1    | 0.1    | 2  | 2  | [10,10]  |
| chr22:40809272 | C22orf32  | UTR3        |                                                                                      | + | AtoG | 0.1111 | 0.1429 | 10 | 2  | [18,21]  |
| chr22:17811327 | C22orf39  | mixed       |                                                                                      | - | AtoG | 0.1    | 0.1    | 3  | 2  | [10,10]  |
| chr22:43968465 | C22orf9   | UTR3        |                                                                                      | - | TtoC | 0.1    | 0.1053 | 4  | 2  | [10,19]  |
| chr22:43968528 | C22orf9   | UTR3        |                                                                                      | - | AtoG | 0.3333 | 0.6    | 4  | 4  | [10,18]  |
| chr22:43968953 | C22orf9   | UTR3        |                                                                                      | - | AtoG | 0.4545 | 0.7692 | 3  | 3  | [10,13]  |
| chr22:43968958 | C22orf9   | UTR3        |                                                                                      | - | AtoG | 0.3636 | 0.6923 | 3  | 2  | [12,13]  |
| chr22:43969023 | C22orf9   | UTR3        |                                                                                      | - | AtoG | 0.1    | 0.5    | 11 | 10 | [10,26]  |



|                |          |             |                                                                                      |   |      |        |        |    |    |         |
|----------------|----------|-------------|--------------------------------------------------------------------------------------|---|------|--------|--------|----|----|---------|
| chr11:73430852 | C2CD3    | mixed       |                                                                                      | - | GtoA | 0.1667 | 0.1667 | 4  | 2  | [12,12] |
| chr2:219745270 | C2orf24  | UTR3        |                                                                                      | - | TtoG | 0.1176 | 0.1176 | 5  | 2  | [17,18] |
| chr2:101252599 | C2orf29  | UTR3        |                                                                                      | + | TtoA | 0.1    | 0.1    | 4  | 2  | [10,20] |
| chr2:75745337  | C2orf3   | coding_exon | ENST00000321027:HtoR;ENST00000409857:HtoR;                                           | - | AtoG | 0.1    | 0.1538 | 2  | 2  | [10,13] |
| chr2:70293015  | C2orf42  | mixed       |                                                                                      | - | AtoG | 0.1    | 0.1    | 3  | 2  | [10,10] |
| chr2:70293359  | C2orf42  | mixed       |                                                                                      | - | AtoG | 0.1053 | 0.1111 | 2  | 2  | [18,19] |
| chr2:20864698  | C2orf43  | mixed       |                                                                                      | - | TtoA | 0.1    | 0.1    | 3  | 2  | [10,10] |
| chr2:24105961  | C2orf44  | UTR3        |                                                                                      | - | AtoG | 0.1    | 0.1176 | 2  | 2  | [10,17] |
| chr2:24107295  | C2orf44  | UTR3        |                                                                                      | - | TtoC | 0.1    | 0.1    | 2  | 2  | [10,10] |
| chr2:200532846 | C2orf47  | coding_exon | ENST00000295079:KtoR;ENST00000392290:KtoR;                                           | + | AtoG | 0.1333 | 0.1667 | 3  | 2  | [12,15] |
| chr2:37332800  | C2orf56  | mixed       |                                                                                      | + | AtoG | 0.1    | 0.1    | 3  | 2  | [10,11] |
| chr2:98583502  | C2orf64  | UTR3        |                                                                                      | - | TtoA | 0.1    | 0.1    | 6  | 2  | [10,30] |
| chr2:200498968 | C2orf69  | UTR3        |                                                                                      | + | GtoA | 0.1    | 0.1    | 2  | 2  | [10,10] |
| chr2:73309181  | C2orf7   | coding_exon | ENST00000258083:HtoP;                                                                | - | AtoC | 0.1818 | 0.2    | 7  | 2  | [11,15] |
| chr2:73309135  | C2orf7   | coding_exon |                                                                                      | - | CtoT | 0.2    | 0.3636 | 5  | 2  | [11,15] |
| chr2:73310761  | C2orf7   | coding_exon |                                                                                      | - | TtoC | 0.1818 | 0.4    | 10 | 4  | [10,16] |
| chr2:73308708  | C2orf7   | UTR3        |                                                                                      | - | TtoC | 0.1176 | 0.2857 | 6  | 4  | [12,17] |
| chr2:24866665  | C2orf79  | UTR3        |                                                                                      | - | GtoC | 0.1538 | 0.1667 | 3  | 2  | [12,13] |
| chr2:24866667  | C2orf79  | UTR3        |                                                                                      | - | AtoG | 0.1053 | 0.1667 | 10 | 5  | [14,21] |
| chr2:24866668  | C2orf79  | UTR3        |                                                                                      | - | CtoG | 0.1111 | 0.12   | 4  | 2  | [18,25] |
| chr2:233430567 | C2orf82  | mixed       |                                                                                      | + | TtoC | 0.1111 | 0.2143 | 5  | 2  | [14,18] |
| chr2:63687807  | C2orf86  | mixed       |                                                                                      | - | TtoC | 0.1    | 0.2857 | 14 | 11 | [10,37] |
| chr2:63687808  | C2orf86  | mixed       |                                                                                      | - | AtoT | 0.1    | 0.2    | 10 | 7  | [10,27] |
| chr3:10143590  | C3orf10  | mixed       |                                                                                      | + | TtoC | 0.1111 | 0.1176 | 7  | 2  | [18,34] |
| chr3:10143624  | C3orf10  | mixed       |                                                                                      | + | TtoC | 0.1    | 0.1111 | 2  | 2  | [10,10] |
| chr3:114207233 | C3orf17  | coding_exon | ENST00000314400:VtoD;ENST00000383675:VtoD;ENST00000393857:VtoD;ENST00000393857:VtoD; | - | TtoA | 0.1    | 0.5    | 3  | 2  | [10,16] |
| chr3:114206623 | C3orf17  | UTR3        |                                                                                      | - | TtoG | 0.1    | 0.1429 | 4  | 2  | [14,20] |
| chr3:114206798 | C3orf17  | UTR3        |                                                                                      | - | TtoC | 0.1    | 0.1538 | 4  | 2  | [11,13] |
| chr3:14684643  | C3orf19  | coding_exon |                                                                                      | + | AtoG | 0.1    | 0.1818 | 4  | 2  | [10,11] |
| chr3:10108922  | C3orf24  | mixed       |                                                                                      | - | TtoC | 0.1    | 0.1    | 4  | 2  | [10,10] |
| chr3:10118022  | C3orf24  | mixed       |                                                                                      | - | AtoT | 0.1    | 0.1    | 5  | 2  | [10,11] |
| chr3:11824319  | C3orf31  | coding_exon | ENST00000444133:Itol;ENST00000455809:Itol;                                           | - | AtoC | 0.1    | 0.2    | 4  | 2  | [10,10] |
| chr3:130492301 | C3orf37  | coding_exon |                                                                                      | + | AtoG | 0.1053 | 0.125  | 2  | 2  | [16,19] |
| chr3:130506708 | C3orf37  | UTR3        |                                                                                      | + | CtoA | 0.1    | 0.12   | 4  | 2  | [10,25] |
| chr3:88288196  | C3orf38  | mixed       |                                                                                      | + | TtoC | 0.1    | 0.1053 | 4  | 2  | [19,20] |
| chr3:113322488 | C3orf52  | mixed       |                                                                                      | + | TtoC | 0.1    | 0.2    | 2  | 2  | [10,10] |
| chr3:113323430 | C3orf52  | mixed       |                                                                                      | + | AtoG | 0.1    | 0.1875 | 7  | 3  | [10,18] |
| chr3:56655601  | C3orf63  | coding_exon | ENST00000296313:HtoR;ENST00000355628:HtoR;ENST00000431842:HtoR;ENST00000431842:HtoR; | - | AtoG | 0.1    | 0.1    | 3  | 2  | [10,10] |
| chr3:56647814  | C3orf63  | coding_exon |                                                                                      | - | AtoG | 0.1    | 0.1053 | 3  | 2  | [10,19] |
| chr3:56632354  | C3orf63  | mixed       |                                                                                      | - | AtoT | 0.1    | 0.125  | 2  | 2  | [10,16] |
| chr4:129169344 | C4orf29  | coding_exon | ENST00000388795:PtoT;ENST00000398961:PtoT;ENST00000398965:PtoT;ENST00000398965:PtoT; | + | CtoA | 0.1    | 0.2    | 2  | 2  | [10,10] |
| chr4:129169342 | C4orf29  | coding_exon | ENST00000388795:NtoS;ENST00000398961:NtoS;ENST00000398965:NtoS;ENST00000398965:NtoS; | + | AtoG | 0.1    | 0.1    | 2  | 2  | [10,10] |
| chr4:17415360  | C4orf30  | coding_exon | ENST00000382247:VtoI;                                                                | - | GtoA | 0.1    | 0.1429 | 5  | 4  | [10,19] |
| chr4:17415248  | C4orf30  | coding_exon | ENST00000382247:KtoM;                                                                | - | AtoT | 0.1429 | 0.5    | 5  | 3  | [10,14] |
| chr4:17415068  | C4orf30  | coding_exon | ENST00000382247:FtoY;                                                                | - | TtoA | 0.1    | 0.3    | 6  | 4  | [10,19] |
| chr4:17415043  | C4orf30  | coding_exon |                                                                                      | - | AtoG | 0.1    | 0.2    | 4  | 4  | [10,20] |
| chr4:17411751  | C4orf30  | UTR3        |                                                                                      | - | GtoA | 0.1    | 0.2143 | 4  | 3  | [10,14] |
| chr4:39229326  | C4orf34  | UTR3        |                                                                                      | - | TtoC | 0.1    | 0.125  | 3  | 2  | [10,24] |
| chr4:39229793  | C4orf34  | UTR3        |                                                                                      | - | TtoC | 0.1053 | 0.2    | 3  | 2  | [19,20] |
| chr4:39316754  | C4orf34  | UTR5        |                                                                                      | - | GtoT | 0.1    | 0.2941 | 8  | 3  | [10,19] |
| chr4:159809850 | C4orf46  | UTR3        |                                                                                      | - | GtoA | 0.1    | 0.125  | 5  | 2  | [10,16] |
| chr4:159810121 | C4orf46  | UTR3        |                                                                                      | - | TtoC | 0.1111 | 0.125  | 2  | 2  | [16,18] |
| chr4:2662454   | C4orf8   | coding_exon | ENST00000324666:NtoT;ENST00000382839:NtoT;                                           | + | AtoC | 0.1667 | 0.2    | 3  | 2  | [10,12] |
| chr4:2631571   | C4orf8   | coding_exon |                                                                                      | + | AtoG | 0.1    | 0.1    | 3  | 2  | [10,10] |
| chr4:2704016   | C4orf8   | UTR3        |                                                                                      | + | TtoC | 0.1667 | 0.25   | 4  | 2  | [12,16] |
| chr5:111119386 | C5orf13  | mixed       |                                                                                      | - | AtoG | 0.1176 | 0.1176 | 8  | 2  | [17,17] |
| chr5:31570171  | C5orf22  | mixed       |                                                                                      | + | GtoA | 0.1    | 0.1    | 2  | 2  | [10,10] |
| chr5:31589572  | C5orf22  | UTR3        |                                                                                      | + | GtoA | 0.1    | 0.1    | 2  | 2  | [10,10] |
| chr5:31590201  | C5orf22  | UTR3        |                                                                                      | + | GtoC | 0.1    | 0.1    | 3  | 2  | [10,10] |
| chr5:31590202  | C5orf22  | UTR3        |                                                                                      | + | AtoT | 0.1    | 0.1818 | 4  | 3  | [10,11] |
| chr5:134218703 | C5orf24  | coding_exon | ENST00000435259:Itov;                                                                | + | AtoG | 0.1    | 0.1    | 2  | 2  | [10,10] |
| chr5:131839529 | C5orf56  | UTR3        |                                                                                      | + | TtoA | 0.1    | 0.1333 | 6  | 2  | [10,15] |
| chr6:34663647  | C6orf106 | UTR3        |                                                                                      | - | AtoG | 0.1    | 0.1977 | 3  | 3  | [40,86] |
| chr6:139406076 | C6orf115 | UTR3        |                                                                                      | + | TtoA | 0.1111 | 0.1333 | 4  | 2  | [10,15] |
| chr6:30727033  | C6orf136 | coding_exon | ENST00000293604:WtoS;ENST00000376471:WtoS;ENST00000376473:WtoS;                      | + | GtoC | 0.1    | 0.1    | 3  | 2  | [10,10] |
| chr6:30726838  | C6orf136 | coding_exon | ENST00000293604:KtoR;ENST00000376471:KtoR;ENST00000376473:KtoR;                      | + | AtoG | 0.1111 | 0.1538 | 3  | 2  | [13,18] |
| chr6:30725677  | C6orf136 | coding_exon | ENST00000293604:EtoK;ENST00000376473:EtoK;                                           | + | AtoA | 0.1    | 0.1667 | 2  | 2  | [10,12] |
| chr6:43101767  | C6orf153 | coding_exon |                                                                                      | + | TtoC | 0.1    | 0.1818 | 4  | 2  | [10,11] |
| chr6:43105289  | C6orf153 | UTR3        |                                                                                      | + | AtoG | 0.1    | 0.1    | 3  | 2  | [10,11] |
| chr6:151832250 | C6orf211 | UTR3        |                                                                                      | + | CtoA | 0.1    | 0.2    | 2  | 2  | [10,10] |
| chr6:151832397 | C6orf211 | UTR3        |                                                                                      | + | AtoG | 0.1667 | 0.2727 | 3  | 2  | [11,12] |
| chr6:44080470  | C6orf223 | mixed       |                                                                                      | + | AtoG | 0.1364 | 0.3    | 3  | 2  | [10,22] |
| chr6:31910687  | C6orf48  | UTR5        |                                                                                      | + | GtoT | 0.1176 | 0.1333 | 5  | 2  | [15,17] |
| chr6:24813294  | C6orf62  | UTR3        |                                                                                      | - | GtoT | 0.1    | 0.2353 | 5  | 3  | [15,20] |
| chr6:24813931  | C6orf62  | UTR3        |                                                                                      | - | TtoC | 0.125  | 0.1429 | 4  | 2  | [16,22] |
| chr6:169897394 | C6orf70  | coding_exon | ENST00000366772:QtoR;ENST00000366773:QtoR;                                           | + | AtoG | 0.1    | 0.1    | 4  | 2  | [10,10] |
| chr6:169898770 | C6orf70  | coding_exon | ENST00000366772:FtoI;ENST00000366773:FtoI;                                           | + | TtoA | 0.1    | 0.1176 | 2  | 2  | [10,17] |
| chr6:149954290 | C6orf72  | UTR3        |                                                                                      | + | TtoA | 0.1    | 0.1818 | 4  | 2  | [10,11] |
| chr6:36999393  | C6orf89  | UTR3        |                                                                                      | + | TtoA | 0.1    | 0.1    | 2  | 2  | [10,10] |
| chr6:37000057  | C6orf89  | UTR3        |                                                                                      | + | TtoA | 0.1    | 0.1333 | 6  | 2  | [10,15] |
| chr7:40139345  | C7orf11  | coding_exon |                                                                                      | - | TtoA | 0.1    | 0.1053 | 5  | 2  | [10,19] |
| chr7:40140726  | C7orf11  | UTR5        |                                                                                      | - | AtoT | 0.1    | 0.1    | 3  | 2  | [10,10] |
| chr7:6608296   | C7orf26  | coding_exon | ENST00000344417:NtoS;ENST00000359073:NtoS;                                           | + | AtoG | 0.125  | 0.1818 | 5  | 2  | [11,16] |
| chr7:2544772   | C7orf27  | coding_exon |                                                                                      | - | AtoG | 0.6154 | 1      | 5  | 5  | [13,17] |
| chr7:66053507  | C7orf42  | coding_exon | ENST00000341567:Gto*;                                                                | + | GtoT | 0.1176 | 0.1429 | 2  | 2  | [17,28] |
| chr7:66058377  | C7orf42  | UTR3        |                                                                                      | + | TtoC | 0.1154 | 0.125  | 10 | 3  | [27,33] |
| chr7:66060614  | C7orf42  | UTR3        |                                                                                      | + | AtoG | 0.1    | 0.125  | 2  | 2  | [16,20] |
| chr7:66060623  | C7orf42  | UTR3        |                                                                                      | + | TtoC | 0.1429 | 0.1667 | 3  | 3  | [12,14] |
| chr7:99592197  | C7orf43  | coding_exon | ENST00000316937:YtoH;ENST00000419841:YtoH;ENST00000457641:YtoH;                      | - | TtoC | 0.1    | 0.1111 | 2  | 2  | [10,10] |
| chr7:1003168   | C7orf50  | UTR3        |                                                                                      | - | AtoG | 0.1429 | 0.2    | 5  | 3  | [10,28] |
| chr7:99585055  | C7orf59  | coding_exon |                                                                                      | + | TtoA | 0.1    | 0.1    | 4  | 2  | [10,10] |
| chr7:99589763  | C7orf59  | mixed       |                                                                                      | + | GtoA | 0.5455 | 0.6667 | 2  | 2  | [12,12] |
| chr7:99590628  | C7orf59  | mixed       |                                                                                      | + | GtoT | 0.1    | 0.1    | 2  | 2  | [10,10] |
| chr7:99590979  | C7orf59  | mixed       |                                                                                      | + | GtoT | 0.1    | 0.125  | 4  | 2  | [10,16] |
| chr7:99589755  | C7orf59  | UTR3        |                                                                                      | + | GtoA | 0.1111 | 0.1515 | 4  | 2  | [18,33] |
| chr7:99589759  | C7orf59  | UTR3        |                                                                                      | + | TtoC | 0.1    | 0.1154 | 8  | 2  | [20,26] |

|                 |          |             |                                                                                     |   |      |        |        |    |    |          |
|-----------------|----------|-------------|-------------------------------------------------------------------------------------|---|------|--------|--------|----|----|----------|
| chr7:99589762   | C7orf59  | UTR3        |                                                                                     | + | AtoG | 0.1    | 0.125  | 4  | 2  | [10,17]  |
| chr7:112247007  | C7orf60  | UTR3        |                                                                                     | - | TtoC | 0.1    | 0.1    | 2  | 2  | [10,10]  |
| chr8:146250517  | C8orf33  | UTR3        |                                                                                     | + | AtoG | 0.1    | 0.1    | 2  | 2  | [10,20]  |
| chr8:33477873   | C8orf41  | coding_exon |                                                                                     | - | AtoT | 0.1    | 0.1111 | 4  | 2  | [11,19]  |
| chr8:143814372  | C8orf55  | UTR3        |                                                                                     | + | GtoT | 0.1    | 0.1    | 2  | 2  | [10,10]  |
| chr8:143814660  | C8orf55  | UTR3        |                                                                                     | + | TtoC | 0.1    | 0.1    | 2  | 2  | [10,11]  |
| chr8:86314079   | C8orf59  | coding_exon | ENST00000417663:DtoN;ENST00000421308:DtoN;ENST00000431163:DtoN;ENST00000431163:DtoN | - | GtoA | 0.1667 | 0.4286 | 2  | 2  | [14,24]  |
| chr8:86314009   | C8orf59  | UTR3        |                                                                                     | - | TtoA | 0.2    | 0.3077 | 2  | 2  | [11,13]  |
| chr8:86319843   | C8orf59  | UTR5        |                                                                                     | - | CtoT | 0.1034 | 0.125  | 5  | 2  | [16,29]  |
| chr8:124301619  | C8orf76  | coding_exon | ENST00000276704:StoP;                                                               | - | TtoC | 0.1    | 0.1    | 5  | 2  | [10,10]  |
| chr8:124312866  | C8orf76  | coding_exon | ENST00000276704:StoA;                                                               | - | TtoG | 0.1    | 0.1    | 2  | 2  | [10,10]  |
| chr9:35653375   | C9orf100 | coding_exon | ENST00000343259:VtoA;ENST00000378382:VtoA;ENST00000378387:VtoA;ENST00000378387:VtoA | - | TtoC | 0.1    | 0.1667 | 3  | 2  | [10,18]  |
| chr9:97677149   | C9orf130 | mixed       |                                                                                     | - | CtoA | 0.1    | 0.1    | 2  | 2  | [10,10]  |
| chr9:129966018  | C9orf16  | UTR3        |                                                                                     | + | TtoC | 0.1111 | 0.1818 | 7  | 3  | [11,18]  |
| chr9:5351155    | C9orf46  | coding_exon | ENST00000223864:VtoA;                                                               | - | TtoC | 0.1    | 0.1    | 3  | 2  | [11,20]  |
| chr9:5351851    | C9orf46  | coding_exon | ENST00000223864:VtoG;                                                               | - | AtoG | 0.1538 | 0.2    | 4  | 2  | [10,13]  |
| chr9:5348207    | C9orf46  | UTR3        |                                                                                     | - | AtoG | 0.1    | 0.1765 | 2  | 2  | [10,17]  |
| chr9:85744131   | C9orf64  | UTR3        |                                                                                     | - | AtoG | 0.1    | 0.1    | 2  | 2  | [10,10]  |
| chr9:4654902    | C9orf68  | coding_exon |                                                                                     | - | AtoT | 0.1    | 0.1333 | 2  | 2  | [10,15]  |
| chr9:131629503  | C9orf78  | UTR3        |                                                                                     | - | GtoA | 0.1875 | 0.25   | 5  | 2  | [12,16]  |
| chr9:114491698  | C9orf80  | coding_exon | ENST00000374236:StoC;ENST00000374242:StoC;                                          | - | CtoG | 0.1053 | 0.1538 | 5  | 2  | [13,19]  |
| chr9:114491681  | C9orf80  | coding_exon | ENST00000374236:RtoW;ENST00000374242:RtoW;                                          | - | CtoT | 0.1    | 0.125  | 2  | 2  | [16,20]  |
| chr9:26877510   | C9orf82  | coding_exon | ENST00000333916:VtoG;                                                               | - | AtoG | 0.1    | 0.1429 | 3  | 2  | [10,14]  |
| chr9:76873811   | C9orf95  | coding_exon |                                                                                     | - | TtoC | 0.1    | 0.1667 | 3  | 2  | [10,12]  |
| chr22:22813431  | CABIN1   | coding_exon | ENST00000263119:LtoP;ENST00000398319:LtoP;ENST00000405822:LtoP;                     | + | TtoC | 0.1    | 0.1    | 2  | 2  | [10,10]  |
| chr22:1972777   | CACNA1C  | coding_exon |                                                                                     | + | AtoG | 0.1    | 0.1    | 2  | 2  | [10,11]  |
| chr1:179814950  | CACNA1E  | coding_exon | ENST00000357570:KtoE;ENST00000358338:KtoE;ENST00000360108:KtoE;ENST00000360108:KtoE | + | AtoG | 0.1    | 0.1    | 4  | 2  | [10,10]  |
| chr1:180035390  | CACNA1E  | UTR3        |                                                                                     | + | TtoG | 0.1111 | 0.1429 | 4  | 2  | [14,18]  |
| chr2:27297602   | CAD      | coding_exon | ENST00000264705:StoP;ENST00000403525:StoP;                                          | + | TtoC | 0.1053 | 0.1111 | 6  | 2  | [19,27]  |
| chr17:44296134  | CALCOCO2 | UTR3        |                                                                                     | + | AtoG | 0.1    | 0.1333 | 6  | 2  | [10,15]  |
| chr10:105196589 | CALHM2   | UTR3        |                                                                                     | - | CtoA | 0.1    | 0.2727 | 2  | 2  | [10,12]  |
| chr10:105199708 | CALHM2   | UTR5        |                                                                                     | - | AtoC | 0.1    | 0.2667 | 4  | 4  | [10,29]  |
| chr2:47253101   | CALM2    | mixed       |                                                                                     | - | TtoC | 0.1    | 0.1111 | 2  | 2  | [10,10]  |
| chr2:47156201   | CALM2    | UTR3        |                                                                                     | - | GtoT | 0.1    | 0.125  | 6  | 3  | [10,24]  |
| chr2:47240893   | CALM2    | UTR3        |                                                                                     | - | TtoA | 0.1224 | 0.125  | 8  | 2  | [34,54]  |
| chr2:47257139   | CALM2    | UTR5        |                                                                                     | - | AtoT | 0.1    | 0.2222 | 8  | 4  | [10,55]  |
| chr2:47257140   | CALM2    | UTR5        |                                                                                     | - | GtoC | 0.1026 | 0.1304 | 4  | 3  | [18,39]  |
| chr2:47257146   | CALM2    | UTR5        |                                                                                     | - | TtoG | 0.1    | 0.1667 | 9  | 3  | [10,14]  |
| chr19:12915900  | CALR     | UTR3        |                                                                                     | + | GtoC | 0.1364 | 0.1579 | 3  | 2  | [22,38]  |
| chr19:12916269  | CALR     | UTR3        |                                                                                     | + | AtoG | 0.1154 | 0.1667 | 12 | 3  | [12,27]  |
| chr19:12916273  | CALR     | UTR3        |                                                                                     | + | AtoG | 0.1818 | 0.25   | 3  | 2  | [11,12]  |
| chr7:128198292  | CALU     | UTR3        |                                                                                     | + | TtoA | 0.1    | 0.125  | 5  | 3  | [10,24]  |
| chr7:128198548  | CALU     | UTR3        |                                                                                     | + | AtoG | 0.1    | 0.1538 | 4  | 3  | [10,13]  |
| chr7:128198672  | CALU     | UTR3        |                                                                                     | + | TtoG | 0.1    | 0.1    | 2  | 2  | [10,10]  |
| chr10:12907702  | CAMK1D   | coding_exon | ENST00000378845:YtoS;                                                               | + | AtoC | 0.1    | 0.125  | 2  | 2  | [10,16]  |
| chr10:12851714  | CAMK1D   | coding_exon | ENST00000378845:StoP;ENST00000378847:StoP;                                          | + | TtoC | 0.1    | 0.1    | 4  | 2  | [10,10]  |
| chr10:12912013  | CAMK1D   | UTR3        |                                                                                     | + | TtoG | 0.1    | 0.1    | 2  | 2  | [10,10]  |
| chr10:12916593  | CAMK1D   | UTR3        |                                                                                     | + | TtoG | 0.1    | 0.2353 | 2  | 2  | [10,18]  |
| chr4:114593599  | CAMK2D   | UTR3        |                                                                                     | - | GtoA | 0.1    | 0.1    | 2  | 2  | [10,10]  |
| chr10:75242710  | CAMK2G   | UTR3        |                                                                                     | - | AtoG | 0.1    | 0.1    | 3  | 3  | [10,20]  |
| chr5:110847856  | CAMK4    | coding_exon |                                                                                     | + | TtoC | 0.1071 | 0.2    | 3  | 2  | [10,28]  |
| chr5:110848173  | CAMK4    | UTR3        |                                                                                     | + | TtoC | 0.1    | 0.1111 | 4  | 2  | [10,18]  |
| chr5:110848176  | CAMK4    | UTR3        |                                                                                     | + | AtoG | 0.1    | 0.1667 | 12 | 6  | [10,12]  |
| chr12:120162590 | CAMKK2   | UTR3        |                                                                                     | - | AtoG | 0.1053 | 0.125  | 4  | 2  | [16,19]  |
| chr5:134105060  | CAMLG    | coding_exon | ENST00000297156:VtoA;                                                               | + | TtoC | 0.1    | 0.1538 | 3  | 2  | [10,13]  |
| chr9:137854457  | CAMSAP1  | coding_exon | ENST00000312405:VtoE;ENST00000389532:VtoE;ENST00000389533:VtoE;ENST00000389533:VtoE | - | TtoA | 0.1    | 0.1    | 2  | 2  | [10,10]  |
| chr1:199096371  | CAMSAP11 | UTR3        |                                                                                     | + | TtoC | 0.1    | 0.125  | 2  | 2  | [10,16]  |
| chr12:65990255  | CAND1    | coding_exon |                                                                                     | + | AtoG | 0.1    | 0.1538 | 3  | 2  | [13,20]  |
| chr12:65993007  | CAND1    | UTR3        |                                                                                     | + | AtoG | 0.1667 | 0.3571 | 2  | 2  | [12,15]  |
| chr3:12852538   | CAND2    | coding_exon |                                                                                     | + | AtoT | 0.1034 | 0.2    | 5  | 4  | [10,29]  |
| chr3:12852539   | CAND2    | coding_exon |                                                                                     | + | TtoC | 0.1084 | 0.1333 | 11 | 4  | [15,83]  |
| chr3:12852540   | CAND2    | coding_exon |                                                                                     | + | GtoT | 0.1364 | 0.1429 | 9  | 2  | [21,22]  |
| chr3:12852544   | CAND2    | coding_exon |                                                                                     | + | GtoT | 0.1048 | 0.177  | 15 | 5  | [35,114] |
| chr3:12852545   | CAND2    | coding_exon |                                                                                     | + | AtoT | 0.1086 | 0.2373 | 19 | 11 | [38,178] |
| chr3:12852547   | CAND2    | coding_exon |                                                                                     | + | GtoT | 0.1117 | 0.2025 | 19 | 15 | [63,569] |
| chr17:74500590  | CANT1    | UTR3        |                                                                                     | - | TtoG | 0.1    | 0.1538 | 3  | 3  | [10,17]  |
| chr5:179088514  | CANX     | UTR3        |                                                                                     | + | TtoC | 0.1667 | 0.2    | 4  | 2  | [10,18]  |
| chr5:179090533  | CANX     | UTR3        |                                                                                     | + | TtoA | 0.1333 | 0.3    | 9  | 8  | [15,40]  |
| chr2:85475400   | CAPG     | UTR3        |                                                                                     | - | GtoA | 0.1538 | 0.2    | 2  | 2  | [10,14]  |
| chr11:64736039  | CAPN1    | UTR3        |                                                                                     | + | CtoA | 0.1176 | 0.1818 | 2  | 2  | [11,17]  |
| chr2:241183391  | CAPN10   | coding_exon | ENST00000354082:Wto*;ENST00000391982:Wto*;ENST00000391984:Wto*;ENST00000391984:Wto* | + | GtoA | 0.1    | 0.1818 | 3  | 2  | [10,11]  |
| chr2:241183392  | CAPN10   | coding_exon | ENST00000354082:KtoQ;ENST00000391982:KtoQ;ENST00000391984:KtoQ;ENST00000391984:KtoQ | + | AtoC | 0.125  | 0.1429 | 4  | 2  | [14,16]  |
| chr15:40431558  | CAPN3    | UTR5        |                                                                                     | + | AtoC | 0.1    | 0.1538 | 5  | 2  | [10,13]  |
| chr19:41333090  | CAPNS1   | UTR3        |                                                                                     | + | TtoA | 0.4615 | 0.6667 | 3  | 3  | [10,13]  |
| chr11:34078429  | CAPRIN1  | UTR3        |                                                                                     | + | TtoC | 0.1    | 0.1212 | 2  | 2  | [41,66]  |
| chr11:34079232  | CAPRIN1  | UTR3        |                                                                                     | + | GtoA | 0.1    | 0.1429 | 2  | 2  | [14,20]  |
| chr1:113011240  | CAPZA1   | coding_exon | ENST00000263168:NtoD;                                                               | + | AtoG | 0.119  | 0.1923 | 12 | 2  | [26,42]  |
| chr1:113003871  | CAPZA1   | coding_exon | ENST00000263168:KtoE;                                                               | + | AtoG | 0.1    | 0.1    | 5  | 2  | [10,20]  |
| chr7:116346164  | CAPZA2   | UTR3        |                                                                                     | + | TtoC | 0.1    | 0.2857 | 3  | 3  | [10,14]  |
| chr7:116346167  | CAPZA2   | UTR3        |                                                                                     | + | TtoA | 0.1    | 0.1    | 3  | 2  | [10,10]  |
| chr7:116346357  | CAPZA2   | UTR3        |                                                                                     | + | TtoC | 0.1    | 0.2222 | 2  | 2  | [10,10]  |
| chr1:19537975   | CAPZB    | UTR3        |                                                                                     | - | TtoG | 0.1    | 0.1154 | 3  | 2  | [11,28]  |
| chr1:19537977   | CAPZB    | UTR3        |                                                                                     | - | GtoA | 0.1176 | 0.1667 | 4  | 2  | [12,17]  |
| chr19:53444845  | CARD8    | UTR5        |                                                                                     | - | AtoG | 0.1    | 0.2    | 4  | 2  | [10,10]  |
| chr16:8854697   | CARHSP1  | UTR3        |                                                                                     | - | TtoC | 0.1    | 0.1667 | 2  | 2  | [10,18]  |
| chr16:8854698   | CARHSP1  | UTR3        |                                                                                     | - | CtoT | 0.1429 | 0.5455 | 6  | 6  | [10,21]  |
| chr16:8856270   | CARHSP1  | UTR3        |                                                                                     | - | GtoA | 0.1818 | 0.6364 | 10 | 8  | [11,22]  |
| chr13:110087477 | CARKD    | coding_exon | ENST00000309957:VtoG;ENST00000397191:VtoG;ENST00000424185:VtoG;ENST00000424185:VtoG | + | TtoG | 0.1818 | 0.2    | 3  | 2  | [10,11]  |
| chr13:110085827 | CARKD    | mixed       |                                                                                     | + | TtoA | 0.1818 | 0.1875 | 6  | 2  | [12,17]  |
| chr11:2995734   | CARS     | coding_exon |                                                                                     | - | CtoT | 0.1875 | 0.2857 | 5  | 2  | [14,16]  |
| chr13:110091770 | CARS2    | UTR3        |                                                                                     | - | AtoG | 0.1    | 0.2    | 4  | 4  | [10,13]  |
| chr17:35578166  | CASC3    | coding_exon |                                                                                     | + | AtoC | 0.1034 | 0.1667 | 3  | 2  | [18,29]  |
| chr17:35580292  | CASC3    | mixed       |                                                                                     | + | AtoG | 0.1    | 0.1    | 2  | 2  | [10,10]  |
| chr15:38701703  | CASC5    | coding_exon | ENST00000260369:PtOH;ENST00000346991:PtOH;ENST00000399668:PtOH;                     | + | CtoA | 0.1    | 0.1    | 2  | 2  | [10,11]  |
| chr15:38705127  | CASC5    | coding_exon |                                                                                     | + | GtoA | 0.1    | 0.1333 | 2  | 2  | [10,15]  |
| chr11:104417540 | CASP1    | coding_exon |                                                                                     | - | TtoC | 0.1    | 0.1538 | 9  | 2  | [10,13]  |

|                 |          |             |                                                                                     |   |      |        |        |    |   |         |
|-----------------|----------|-------------|-------------------------------------------------------------------------------------|---|------|--------|--------|----|---|---------|
| chr7:142713204  | CASP2    | UTR3        |                                                                                     | + | TtoC | 0.1    | 0.1    | 4  | 2 | [10,10] |
| chr4:185786290  | CASP3    | UTR3        |                                                                                     | - | AtoG | 0.1111 | 0.2    | 7  | 3 | [10,18] |
| chr4:185787180  | CASP3    | UTR3        |                                                                                     | - | AtoG | 0.1176 | 0.1333 | 7  | 2 | [15,17] |
| chr4:185787401  | CASP3    | UTR3        |                                                                                     | - | GtoT | 0.1    | 0.1091 | 5  | 3 | [20,55] |
| chr11:104318849 | CASP4    | UTR3        |                                                                                     | - | TtoG | 0.1053 | 0.1111 | 6  | 2 | [10,19] |
| chr2:201839549  | CASP8    | coding_exon | ENST00000264274:QtoR;ENST00000264275:QtoR;ENST00000303385:QtoR;ENST00000303386:QtoR | + | AtoG | 0.1    | 0.1429 | 3  | 2 | [10,14] |
| chr5:96134289   | CAST     | UTR3        |                                                                                     | + | TtoA | 0.1    | 0.1818 | 4  | 2 | [10,11] |
| chr5:96134648   | CAST     | UTR3        |                                                                                     | + | TtoA | 0.1    | 0.1    | 5  | 2 | [10,20] |
| chr5:96135536   | CAST     | UTR3        |                                                                                     | + | AtoG | 0.125  | 0.1538 | 2  | 2 | [13,16] |
| chr11:34449665  | CAT      | UTR3        |                                                                                     | + | TtoA | 0.1    | 0.1111 | 6  | 2 | [10,18] |
| chr20:31696261  | CBFA2T2  | UTR3        |                                                                                     | + | AtoC | 0.1    | 0.2    | 2  | 2 | [10,10] |
| chr16:87470044  | CBFA2T3  | UTR3        |                                                                                     | - | AtoG | 0.1    | 0.1818 | 3  | 2 | [10,11] |
| chr16:65690393  | CBFB     | UTR3        |                                                                                     | + | TtoA | 0.1    | 0.2    | 3  | 2 | [10,10] |
| chr16:65691715  | CBFB     | UTR3        |                                                                                     | + | GtoA | 0.1    | 0.1    | 5  | 2 | [10,10] |
| chr16:65692254  | CBFB     | UTR3        |                                                                                     | + | TtoG | 0.12   | 0.1818 | 7  | 4 | [11,26] |
| chr11:118679382 | CBL      | UTR3        |                                                                                     | + | TtoC | 0.1    | 0.1333 | 3  | 2 | [10,15] |
| chr11:118680246 | CBL      | UTR3        |                                                                                     | + | TtoC | 0.125  | 0.1429 | 4  | 2 | [14,16] |
| chr11:118682349 | CBL      | UTR3        |                                                                                     | + | TtoG | 0.5455 | 0.5769 | 2  | 2 | [12,26] |
| chr11:118682601 | CBL      | UTR3        |                                                                                     | + | GtoC | 0.1    | 0.1333 | 2  | 2 | [15,20] |
| chr11:118683108 | CBL      | UTR3        |                                                                                     | + | TtoC | 0.1176 | 0.12   | 6  | 2 | [17,25] |
| chr3:106903631  | CBLB     | coding_exon |                                                                                     | - | TtoA | 0.1    | 0.1    | 3  | 2 | [10,20] |
| chr3:106859864  | CBLB     | UTR3        |                                                                                     | - | AtoC | 0.1    | 0.1429 | 2  | 2 | [10,14] |
| chr4:170146290  | CBR4     | mixed       |                                                                                     | - | TtoC | 0.1    | 0.1    | 2  | 2 | [10,10] |
| chr12:52923236  | CBX5     | coding_exon |                                                                                     | - | TtoA | 0.1053 | 0.12   | 3  | 2 | [19,25] |
| chr12:52914322  | CBX5     | UTR3        |                                                                                     | - | GtoA | 0.1579 | 0.1667 | 2  | 2 | [12,19] |
| chr12:52914708  | CBX5     | UTR3        |                                                                                     | - | AtoG | 0.1304 | 0.1538 | 3  | 3 | [13,24] |
| chr12:52915110  | CBX5     | UTR3        |                                                                                     | - | AtoG | 0.1    | 0.1176 | 4  | 2 | [10,17] |
| chr12:52916820  | CBX5     | UTR3        |                                                                                     | - | GtoT | 0.1    | 0.15   | 4  | 2 | [20,20] |
| chr12:52921522  | CBX5     | UTR3        |                                                                                     | - | CtoA | 0.1    | 0.1    | 2  | 2 | [10,10] |
| chr22:37589492  | CBX6     | UTR3        |                                                                                     | - | GtoA | 0.1818 | 0.2143 | 2  | 2 | [14,22] |
| chr22:37394057  | CBY1     | coding_exon | ENST00000216029:StoP;ENST00000396811:StoP;ENST00000454616:StoP;                     | + | TtoC | 0.1    | 0.1429 | 2  | 2 | [10,14] |
| chr22:37399621  | CBY1     | UTR3        |                                                                                     | + | TtoA | 0.1    | 0.1    | 4  | 2 | [10,20] |
| chr19:13891753  | CC2D1A   | coding_exon | ENST00000318003:VtoL;ENST00000397486:VtoL;ENST00000412841:VtoL;                     | + | GtoC | 0.1    | 0.2    | 2  | 2 | [10,10] |
| chr1:52599263   | CC2D1B   | mixed       |                                                                                     | - | GtoA | 0.1    | 0.1    | 2  | 2 | [10,10] |
| chr10:70183734  | CCAR1    | coding_exon | ENST00000265872:LtoP;                                                               | + | TtoC | 0.1    | 0.1    | 2  | 2 | [10,10] |
| chr10:70184565  | CCAR1    | coding_exon | ENST00000265872:FtoS;                                                               | + | TtoC | 0.1111 | 0.2    | 2  | 2 | [10,18] |
| chr10:70172216  | CCAR1    | coding_exon |                                                                                     | + | AtoT | 0.125  | 0.1333 | 2  | 2 | [15,16] |
| chr10:70178933  | CCAR1    | coding_exon |                                                                                     | + | AtoC | 0.1    | 0.1765 | 5  | 2 | [10,17] |
| chr2:55616394   | CCDC104  | coding_exon |                                                                                     | + | GtoA | 0.1429 | 0.1818 | 4  | 3 | [11,14] |
| chr9:35651157   | CCDC107  | mixed       |                                                                                     | + | TtoC | 0.1    | 0.1538 | 13 | 5 | [10,26] |
| chr4:110825222  | CCDC109B | coding_exon | ENST00000344132:FtoL;ENST00000394650:FtoL;                                          | + | TtoA | 0.1111 | 0.1579 | 5  | 2 | [21,37] |
| chr4:110828218  | CCDC109B | UTR3        |                                                                                     | + | TtoC | 0.1053 | 0.2    | 4  | 3 | [10,19] |
| chr22:27514201  | CCDC117  | UTR3        |                                                                                     | + | GtoC | 0.1111 | 0.1818 | 2  | 2 | [10,11] |
| chr22:27514937  | CCDC117  | UTR3        |                                                                                     | + | TtoC | 0.1    | 0.2    | 4  | 2 | [10,10] |
| chr22:27515169  | CCDC117  | UTR3        |                                                                                     | + | AtoG | 0.1429 | 0.1818 | 3  | 2 | [11,21] |
| chr19:17915788  | CCDC124  | UTR3        |                                                                                     | + | TtoC | 0.1071 | 0.1875 | 5  | 2 | [16,28] |
| chr3:125150669  | CCDC14   | mixed       |                                                                                     | - | CtoG | 0.1538 | 0.2    | 2  | 2 | [10,13] |
| chr5:42837433   | CCDC152  | UTR3        |                                                                                     | + | AtoG | 0.1    | 0.1429 | 2  | 2 | [15,20] |
| chr6:139156081  | CCDC28A  | UTR3        |                                                                                     | + | AtoG | 0.1    | 0.2    | 3  | 2 | [10,10] |
| chr1:32443562   | CCDC28B  | UTR3        |                                                                                     | + | CtoA | 0.1333 | 0.3333 | 7  | 6 | [12,31] |
| chr1:32443563   | CCDC28B  | UTR3        |                                                                                     | + | AtoG | 0.129  | 0.2632 | 8  | 5 | [12,31] |
| chr11:27318833  | CCDC34   | coding_exon | ENST00000328697:NtoS;                                                               | - | AtoG | 0.4211 | 0.4615 | 2  | 2 | [13,19] |
| chr3:181810445  | CCDC39   | mixed       |                                                                                     | - | AtoC | 0.1    | 0.1    | 3  | 2 | [10,10] |
| chr3:181810670  | CCDC39   | mixed       |                                                                                     | - | TtoC | 0.1    | 0.1    | 3  | 2 | [10,10] |
| chr17:59959434  | CCDC45   | coding_exon | ENST00000269064:HtoL;ENST00000397727:HtoL;                                          | + | AtoT | 0.1    | 0.1    | 2  | 2 | [10,10] |
| chr17:59957532  | CCDC45   | coding_exon |                                                                                     | + | AtoG | 0.1    | 0.1    | 2  | 2 | [10,10] |
| chr17:59177086  | CCDC47   | UTR3        |                                                                                     | - | TtoG | 0.1    | 0.3077 | 4  | 2 | [10,13] |
| chr17:34211928  | CCDC49   | coding_exon | ENST00000225428:NtoK;                                                               | - | TtoA | 0.1    | 0.1667 | 5  | 3 | [10,13] |
| chr17:34224805  | CCDC49   | coding_exon | ENST00000225428:LtoR;                                                               | - | TtoG | 0.1    | 0.1    | 2  | 2 | [10,11] |
| chr17:34220359  | CCDC49   | coding_exon | ENST00000225428:EtoK;                                                               | - | GtoA | 0.1    | 0.3    | 5  | 3 | [10,22] |
| chr17:34219544  | CCDC49   | coding_exon |                                                                                     | - | AtoG | 0.1163 | 0.2143 | 16 | 7 | [14,43] |
| chr17:34220249  | CCDC49   | coding_exon |                                                                                     | - | GtoA | 0.1    | 0.1667 | 3  | 2 | [10,12] |
| chr17:34211814  | CCDC49   | UTR3        |                                                                                     | - | TtoA | 0.1667 | 0.1818 | 2  | 2 | [11,12] |
| chr3:114655226  | CCDC52   | coding_exon | ENST00000295872:StoL;                                                               | - | GtoT | 0.1    | 0.1    | 2  | 2 | [10,10] |
| chr12:100979186 | CCDC53   | coding_exon |                                                                                     | - | CtoT | 0.1    | 0.1429 | 3  | 2 | [10,14] |
| chr17:25469263  | CCDC55   | coding_exon |                                                                                     | + | CtoT | 0.2308 | 0.3    | 3  | 2 | [10,39] |
| chr17:25523691  | CCDC55   | coding_exon |                                                                                     | + | TtoC | 0.1    | 0.2727 | 3  | 3 | [10,33] |
| chr17:77652659  | CCDC57   | UTR3        |                                                                                     | - | AtoG | 0.1111 | 0.1739 | 3  | 2 | [18,23] |
| chr3:123569761  | CCDC58   | coding_exon | ENST00000291458:NtoK;ENST00000479899:NtoK;                                          | - | TtoG | 0.1053 | 0.125  | 3  | 2 | [16,19] |
| chr3:123561421  | CCDC58   | coding_exon |                                                                                     | - | TtoC | 0.1176 | 0.1739 | 6  | 4 | [15,24] |
| chr12:81270955  | CCDC59   | UTR3        |                                                                                     | - | AtoG | 0.1    | 0.1    | 2  | 2 | [10,10] |
| chr19:51201700  | CCDC61   | coding_exon | ENST00000263284:LtoP;                                                               | + | TtoC | 0.1    | 0.1    | 2  | 2 | [10,10] |
| chr5:150542231  | CCDC69   | UTR3        |                                                                                     | - | TtoC | 0.1304 | 0.15   | 3  | 2 | [20,23] |
| chr3:49175343   | CCDC71   | mixed       |                                                                                     | - | TtoG | 0.1053 | 0.1111 | 5  | 2 | [19,28] |
| chr2:37176091   | CCDC75   | coding_exon | ENST00000281932:EtoG;ENST00000379187:EtoG;ENST00000409774:EtoG;                     | + | AtoG | 0.1    | 0.1    | 2  | 2 | [10,10] |
| chr2:37170500   | CCDC75   | coding_exon |                                                                                     | + | AtoG | 0.1538 | 0.1765 | 3  | 2 | [13,17] |
| chr1:100386333  | CCDC76   | coding_exon |                                                                                     | + | AtoG | 0.1    | 0.1    | 2  | 2 | [10,10] |
| chr11:95756933  | CCDC82   | coding_exon |                                                                                     | - | TtoC | 0.1    | 0.1538 | 4  | 2 | [10,13] |
| chr11:118390957 | CCDC84   | coding_exon |                                                                                     | + | TtoC | 0.1818 | 0.1818 | 4  | 2 | [11,11] |
| chr2:55376418   | CCDC88A  | coding_exon |                                                                                     | - | AtoT | 0.1    | 0.1053 | 4  | 2 | [10,19] |
| chr11:63873710  | CCDC88B  | mixed       |                                                                                     | + | GtoC | 0.1111 | 0.12   | 2  | 2 | [25,27] |
| chr11:63873713  | CCDC88B  | mixed       |                                                                                     | + | CtoG | 0.1    | 0.2    | 5  | 4 | [10,26] |
| chr11:63881574  | CCDC88B  | UTR3        |                                                                                     | + | GtoA | 0.1538 | 0.2    | 2  | 2 | [11,27] |
| chr14:90874160  | CCDC88C  | coding_exon | ENST00000389857:EtoG;                                                               | - | AtoG | 0.1    | 0.1    | 2  | 2 | [10,10] |
| chr14:90819614  | CCDC88C  | coding_exon | ENST00000331194:StoT;ENST00000389857:GtoA;ENST00000427583:StoT;                     | - | GtoC | 0.1    | 0.1053 | 3  | 2 | [10,19] |
| chr19:52455435  | CCDC9    | coding_exon |                                                                                     | + | TtoC | 0.1    | 0.125  | 4  | 2 | [10,24] |
| chr11:82650574  | CCDC90B  | UTR3        |                                                                                     | - | TtoG | 0.1    | 0.1176 | 4  | 2 | [10,17] |
| chr12:28435532  | CCDC91   | coding_exon | ENST00000306172:QtoR;ENST00000381259:QtoR;                                          | + | AtoG | 0.1667 | 0.25   | 2  | 2 | [12,12] |
| chr19:46520849  | CCDC97   | UTR3        |                                                                                     | + | TtoC | 0.12   | 0.2    | 3  | 2 | [10,25] |
| chr5:168953818  | CCDC99   | coding_exon | ENST00000265295:LtoP;ENST00000446362:LtoP;                                          | + | TtoC | 0.1    | 0.1053 | 2  | 2 | [10,21] |
| chr6:31230419   | CCHCR1   | mixed       |                                                                                     | - | GtoT | 0.1    | 0.1    | 2  | 2 | [10,10] |
| chr16:55957595  | CCL22    | UTR3        |                                                                                     | + | TtoG | 0.1154 | 0.1667 | 6  | 2 | [12,28] |
| chr16:55950195  | CCL22    | UTR3        |                                                                                     | + | TtoG | 0.4167 | 0.4706 | 3  | 3 | [12,21] |
| chr4:122958228  | CCNA2    | UTR3        |                                                                                     | - | CtoG | 0.1    | 0.1    | 3  | 2 | [10,10] |
| chr5:68509235   | CCNB1    | UTR3        |                                                                                     | + | TtoG | 0.1538 | 0.1538 | 9  | 2 | [13,26] |
| chr5:68498741   | CCNB1    | UTR5        |                                                                                     | + | GtoT | 0.1    | 0.2    | 3  | 2 | [10,10] |

|                |          |             |                                                                         |   |      |        |        |    |    |             |
|----------------|----------|-------------|-------------------------------------------------------------------------|---|------|--------|--------|----|----|-------------|
| chr14:19854432 | CCNB1IP1 | coding_exon | ENST00000353689:Itov;ENST00000358932:Itov;ENST00000398160:Itov;ENST0000 | - | AtoG | 0.1    | 0.1538 | 2  | 2  | [10,13]     |
| chr6:100097483 | CCNC     | UTR3        |                                                                         | - | TtoC | 0.1    | 0.1739 | 8  | 4  | [23,36]     |
| chr6:100097586 | CCNC     | UTR3        |                                                                         | - | GtoT | 0.1    | 0.1    | 4  | 2  | [10,20]     |
| chr12:4280763  | CCND2    | UTR3        |                                                                         | + | AtoG | 0.102  | 0.1667 | 6  | 4  | [12,49]     |
| chr12:4280794  | CCND2    | UTR3        |                                                                         | + | AtoT | 0.1176 | 0.3333 | 11 | 11 | [11,72]     |
| chr12:4281331  | CCND2    | UTR3        |                                                                         | + | AtoG | 0.1333 | 0.1765 | 6  | 3  | [15,17]     |
| chr12:4253196  | CCND2    | UTR5        |                                                                         | + | AtoG | 0.1    | 0.1364 | 2  | 2  | [10,22]     |
| chr12:4253215  | CCND2    | UTR5        |                                                                         | + | AtoT | 0.1515 | 0.1667 | 2  | 2  | [30,34]     |
| chr6:42011333  | CCND3    | UTR3        |                                                                         | - | AtoC | 0.2222 | 0.3333 | 2  | 2  | [12,36]     |
| chr19:35003512 | CCNE1    | coding_exon | ENST00000262643:YtoH;ENST00000444983:YtoH;                              | + | TtoC | 0.1    | 0.1667 | 3  | 2  | [10,13]     |
| chr19:35006474 | CCNE1    | coding_exon | ENST00000262643:TtoP;ENST00000357943:TtoP;ENST00000444983:TtoP;         | + | AtoC | 0.1111 | 0.2    | 6  | 3  | [10,18]     |
| chr19:35006559 | CCNE1    | UTR3        |                                                                         | + | GtoA | 0.1053 | 0.2    | 4  | 2  | [15,19]     |
| chr16:2447710  | CCNF     | UTR3        |                                                                         | + | TtoC | 0.1154 | 0.2    | 5  | 2  | [16,26]     |
| chr16:2448852  | CCNF     | UTR3        |                                                                         | + | TtoC | 0.1667 | 0.1667 | 3  | 2  | [12,13]     |
| chr5:86740926  | CCNH     | coding_exon | ENST00000256897:CtoF;ENST00000448765:CtoF;                              | - | GtoT | 0.2    | 0.2    | 2  | 2  | [10,15]     |
| chr4:78187338  | CCNI     | UTR3        |                                                                         | - | TtoC | 0.1429 | 0.4    | 6  | 3  | [11,21]     |
| chr4:78187806  | CCNI     | UTR3        |                                                                         | - | AtoG | 0.1    | 0.2083 | 6  | 2  | [20,25]     |
| chr4:78187808  | CCNI     | UTR3        |                                                                         | - | TtoA | 0.1429 | 0.2    | 4  | 2  | [10,28]     |
| chr3:158352661 | CCNL1    | coding_exon | ENST00000295926:WtoR;ENST00000417607:WtoR;ENST00000461804:WtoR;         | - | TtoA | 0.1176 | 0.5833 | 10 | 8  | [12,17]     |
| chr3:158350635 | CCNL1    | coding_exon |                                                                         | - | TtoC | 0.102  | 0.2083 | 8  | 4  | [24,53]     |
| chr2:135428250 | CCNT2    | coding_exon |                                                                         | + | TtoG | 0.1    | 0.1    | 3  | 2  | [10,10]     |
| chr10:35845544 | CCNY     | coding_exon | ENST00000265375:YtoD;ENST00000339497:YtoD;ENST00000374704:YtoD;ENST00   | + | TtoG | 0.1    | 0.1    | 3  | 2  | [10,10]     |
| chr17:35963548 | CCR7     | UTR3        |                                                                         | - | AtoG | 0.1    | 0.2    | 3  | 2  | [10,10]     |
| chr17:35963549 | CCR7     | UTR3        |                                                                         | - | AtoG | 0.2143 | 0.375  | 7  | 6  | [11,18]     |
| chr12:68265515 | CCT2     | UTR5        |                                                                         | + | GtoA | 0.1    | 0.2    | 4  | 4  | [13,36]     |
| chr1:154545404 | CCT3     | UTR3        |                                                                         | - | TtoC | 0.1    | 0.25   | 9  | 7  | [10,24]     |
| chr2:61949130  | CCT4     | UTR3        |                                                                         | - | TtoC | 0.1    | 0.1111 | 3  | 2  | [10,18]     |
| chr2:73333617  | CCT7     | UTR3        |                                                                         | + | TtoG | 0.1029 | 0.119  | 11 | 4  | [44,71]     |
| chr6:109794440 | CD164    | UTR3        |                                                                         | - | TtoA | 0.1    | 0.1667 | 4  | 4  | [10,20]     |
| chr6:109794639 | CD164    | UTR3        |                                                                         | - | GtoT | 0.1    | 0.1818 | 4  | 2  | [10,11]     |
| chr6:109794640 | CD164    | UTR3        |                                                                         | - | GtoC | 0.1    | 0.1818 | 3  | 2  | [10,11]     |
| chr6:109794648 | CD164    | UTR3        |                                                                         | - | TtoA | 0.1    | 0.1429 | 3  | 2  | [10,14]     |
| chr6:109794650 | CD164    | UTR3        |                                                                         | - | AtoG | 0.1304 | 0.4167 | 5  | 2  | [12,23]     |
| chr3:113551306 | CD200    | coding_exon | ENST00000315711:VtoA;ENST00000383681:VtoA;ENST00000451093:VtoA;ENST00   | + | TtoC | 0.1053 | 0.1429 | 4  | 2  | [14,19]     |
| chr3:113542498 | CD200    | mixed       |                                                                         | + | AtoT | 0.1    | 0.1    | 2  | 2  | [10,10]     |
| chr19:40514815 | CD22     | coding_exon | ENST00000085219:LtoR;ENST00000341773:LtoR;ENST00000419549:LtoR;         | + | TtoG | 0.1    | 0.1429 | 3  | 2  | [14,20]     |
| chr19:40515294 | CD22     | coding_exon |                                                                         | + | AtoG | 0.1111 | 0.1429 | 11 | 4  | [14,41]     |
| chr19:40530094 | CD22     | UTR3        |                                                                         | + | AtoG | 0.1538 | 0.1667 | 3  | 2  | [12,13]     |
| chr18:65765238 | CD226    | coding_exon | ENST00000280200:NtoD;                                                   | - | AtoG | 0.1    | 0.1538 | 3  | 2  | [10,13]     |
| chr18:65679662 | CD226    | UTR3        |                                                                         | - | AtoT | 0.1053 | 0.25   | 2  | 2  | [12,19]     |
| chr18:65679663 | CD226    | UTR3        |                                                                         | - | TtoC | 0.1    | 0.1667 | 3  | 2  | [10,12]     |
| chr18:65681167 | CD226    | UTR3        |                                                                         | - | AtoG | 0.1071 | 0.2    | 6  | 2  | [10,28]     |
| chr18:65681396 | CD226    | UTR3        |                                                                         | - | GtoA | 0.1    | 0.3333 | 12 | 6  | [10,64]     |
| chr18:65681589 | CD226    | UTR3        |                                                                         | - | AtoG | 0.1    | 0.3    | 9  | 2  | [10,10]     |
| chr12:6431137  | CD27     | UTR3        |                                                                         | + | CtoA | 0.1    | 0.2727 | 6  | 4  | [10,11]     |
| chr12:6431138  | CD27     | UTR3        |                                                                         | + | AtoG | 0.1    | 0.2222 | 6  | 3  | [10,11]     |
| chr12:6431141  | CD27     | UTR3        |                                                                         | + | CtoA | 0.2    | 0.3333 | 2  | 2  | [13,25]     |
| chr9:5460448   | CD274    | UTR3        |                                                                         | + | TtoC | 0.1111 | 0.3    | 5  | 2  | [10,18]     |
| chr6:47700552  | CD2AP    | UTR3        |                                                                         | + | AtoG | 0.1    | 0.1    | 3  | 2  | [10,20]     |
| chr6:47701927  | CD2AP    | UTR3        |                                                                         | + | TtoC | 0.1    | 0.1111 | 3  | 2  | [10,19]     |
| chr6:47702068  | CD2AP    | UTR3        |                                                                         | + | AtoG | 0.1    | 0.1111 | 3  | 2  | [10,18]     |
| chr17:69981559 | CD300A   | coding_exon |                                                                         | + | CtoT | 0.1    | 0.1    | 2  | 2  | [10,10]     |
| chr19:50603835 | CD3EAP   | coding_exon | ENST00000309424:KtoE;ENST00000423698:KtoE;                              | + | AtoG | 0.1    | 0.15   | 3  | 2  | [10,21]     |
| chr11:35208047 | CD44     | UTR3        |                                                                         | + | TtoC | 0.1538 | 0.1818 | 6  | 2  | [13,23]     |
| chr11:35209485 | CD44     | UTR3        |                                                                         | + | AtoC | 0.1034 | 0.125  | 4  | 2  | [29,40]     |
| chr11:35209595 | CD44     | UTR3        |                                                                         | + | GtoA | 0.1071 | 0.2143 | 4  | 2  | [14,28]     |
| chr1:206007030 | CD46     | coding_exon |                                                                         | + | AtoG | 0.1    | 0.1667 | 3  | 2  | [10,13]     |
| chr1:206033566 | CD46     | UTR3        |                                                                         | + | TtoC | 0.1053 | 0.15   | 3  | 2  | [19,20]     |
| chr1:206033847 | CD46     | UTR3        |                                                                         | + | AtoG | 0.1    | 0.25   | 7  | 3  | [10,17]     |
| chr1:206035103 | CD46     | UTR3        |                                                                         | + | TtoA | 0.1111 | 0.1176 | 5  | 2  | [17,18]     |
| chr3:109245583 | CD47     | UTR3        |                                                                         | - | TtoC | 0.125  | 0.1333 | 4  | 2  | [15,16]     |
| chr3:109245728 | CD47     | UTR3        |                                                                         | - | AtoC | 0.1    | 0.1    | 2  | 2  | [10,10]     |
| chr1:26519601  | CD52     | UTR3        |                                                                         | + | AtoG | 0.1724 | 0.36   | 8  | 4  | [22,65]     |
| chr1:111244030 | CD53     | UTR3        |                                                                         | + | TtoA | 0.1053 | 0.125  | 6  | 3  | [16,19]     |
| chr1:111217296 | CD53     | UTR5        |                                                                         | + | AtoC | 0.1    | 0.3333 | 12 | 11 | [10,22]     |
| chr1:111217298 | CD53     | UTR5        |                                                                         | + | TtoC | 0.1429 | 0.3684 | 12 | 11 | [10,25]     |
| chr1:116862939 | CD58     | mixed       |                                                                         | - | TtoA | 0.1    | 0.1    | 2  | 2  | [10,10]     |
| chr12:9796567  | CD69     | UTR3        |                                                                         | - | AtoG | 0.1429 | 0.1875 | 5  | 3  | [11,22]     |
| chr19:6536894  | CD70     | mixed       |                                                                         | - | AtoG | 0.1    | 0.2727 | 7  | 4  | [11,30]     |
| chr5:149761401 | CD74     | UTR3        |                                                                         | - | AtoG | 0.1    | 0.2    | 3  | 2  | [20,38]     |
| chr5:149761402 | CD74     | UTR3        |                                                                         | - | AtoG | 0.1364 | 0.2222 | 10 | 4  | [19,44]     |
| chr5:149761403 | CD74     | UTR3        |                                                                         | - | TtoA | 0.1933 | 0.5571 | 14 | 14 | [30,143]    |
| chr5:149761406 | CD74     | UTR3        |                                                                         | - | TtoA | 0.1538 | 0.1667 | 13 | 2  | [66,191]    |
| chr5:149761408 | CD74     | UTR3        |                                                                         | - | GtoA | 0.1402 | 0.1719 | 8  | 3  | [64,290]    |
| chr5:149761980 | CD74     | UTR3        |                                                                         | - | TtoG | 0.1222 | 0.1899 | 6  | 3  | [1872,4407] |
| chr5:149772511 | CD74     | UTR5        |                                                                         | - | TtoG | 0.1515 | 0.1765 | 6  | 3  | [34,66]     |
| chr5:149772524 | CD74     | UTR5        |                                                                         | - | CtoT | 0.1053 | 0.1111 | 5  | 2  | [18,19]     |
| chr19:47077273 | CD79A    | UTR3        |                                                                         | + | AtoG | 0.1    | 0.2308 | 7  | 3  | [10,15]     |
| chr17:59359836 | CD79B    | UTR3        |                                                                         | - | AtoG | 0.2105 | 0.5    | 2  | 2  | [11,19]     |
| chr3:123321130 | CD86     | UTR3        |                                                                         | + | TtoC | 0.1    | 0.1333 | 5  | 2  | [15,20]     |
| chr15:40803736 | CDAN1    | UTR3        |                                                                         | - | TtoC | 0.1    | 0.1    | 2  | 2  | [10,10]     |
| chr10:12278284 | CDC123   | coding_exon | ENST00000281141:StoP;ENST00000378900:StoP;                              | + | TtoC | 0.1    | 0.1053 | 2  | 2  | [10,19]     |
| chr10:62217991 | CDC2     | coding_exon | ENST00000307250:HtoQ;ENST00000373811:HtoQ;ENST00000395284:HtoQ;ENST0    | + | TtoA | 0.1    | 0.1538 | 3  | 2  | [10,13]     |
| chr1:43601439  | CDC20    | UTR3        |                                                                         | + | TtoC | 0.1304 | 0.2    | 12 | 5  | [10,23]     |
| chr3:48173786  | CDC25A   | UTR3        |                                                                         | - | TtoA | 0.1    | 0.1053 | 2  | 2  | [10,19]     |
| chr20:3731597  | CDC25B   | coding_exon | ENST00000245960:LtoP;ENST00000340833:LtoP;ENST00000344256:LtoP;ENST000  | + | TtoC | 0.1053 | 0.125  | 4  | 2  | [16,19]     |
| chr20:3726278  | CDC25B   | coding_exon |                                                                         | + | AtoG | 0.1    | 0.1333 | 3  | 2  | [10,15]     |
| chr20:3733821  | CDC25B   | UTR3        |                                                                         | + | AtoG | 0.125  | 0.1538 | 5  | 3  | [13,17]     |
| chr5:137649188 | CDC25C   | UTR3        |                                                                         | - | AtoG | 0.1    | 0.1    | 2  | 2  | [10,10]     |
| chr9:115060817 | CDC26    | mixed       |                                                                         | - | TtoC | 0.1    | 0.1818 | 2  | 2  | [10,11]     |
| chr17:42574390 | CDC27    | coding_exon | ENST00000066544:EtoA;ENST00000441612:EtoA;                              | - | AtoC | 0.1    | 0.1818 | 3  | 2  | [10,11]     |
| chr17:42550711 | CDC27    | UTR3        |                                                                         | - | TtoC | 0.1    | 0.1176 | 3  | 3  | [10,20]     |
| chr1:1637753   | CDC2L2   | coding_exon | ENST00000317673:RtoK;ENST00000341028:RtoK;ENST00000341832:RtoK;ENST000  | - | GtoA | 0.1    | 0.2963 | 12 | 8  | [11,51]     |
| chr1:1640667   | CDC2L2   | coding_exon |                                                                         | - | GtoA | 0.3529 | 0.7143 | 4  | 4  | [13,17]     |
| chr7:40094317  | CDC2L5   | coding_exon | ENST00000181839:MtoV;ENST00000340829:MtoV;                              | + | AtoG | 0.1304 | 0.1818 | 3  | 2  | [11,23]     |
| chr7:40100653  | CDC2L5   | coding_exon | ENST00000181839:LtoP;ENST00000340829:LtoP;                              | + | TtoC | 0.1    | 0.1    | 2  | 2  | [10,10]     |

|                 |          |             |                                                                        |   |       |        |        |    |    |         |
|-----------------|----------|-------------|------------------------------------------------------------------------|---|-------|--------|--------|----|----|---------|
| chr7:40003671   | CDC2L5   | coding_exon | ENST00000181839:LtoP;ENST00000326351:LtoP;ENST00000340829:LtoP;        | + | TtoC  | 0.1    | 0.1176 | 3  | 2  | [10,17] |
| chr7:39993857   | CDC2L5   | mixed       |                                                                        | + | TtoC  | 0.1    | 0.1333 | 7  | 3  | [10,15] |
| chr7:40101517   | CDC2L5   | UTR3        |                                                                        | + | CtoA  | 0.1    | 0.1    | 2  | 2  | [10,10] |
| chr6:111041483  | CDC2L6   | UTR3        |                                                                        | - | TtoC  | 0.1    | 0.1667 | 3  | 2  | [10,12] |
| chr2:37727325   | CDC42EP3 | mixed       |                                                                        | - | TtoA  | 0.1    | 0.1    | 3  | 2  | [10,10] |
| chr5:130757299  | CDC42SE2 | UTR3        |                                                                        | + | TtoA  | 0.1053 | 0.1111 | 3  | 2  | [10,19] |
| chr6:44505563   | CDCSL    | coding_exon | ENST00000371477:YtoN;ENST00000423012:YtoN;                             | + | TtoA  | 0.1    | 0.2105 | 2  | 2  | [21,30] |
| chr8:25421024   | CDCA2    | coding_exon |                                                                        | + | GtoA  | 0.1053 | 0.1176 | 2  | 2  | [17,19] |
| chr12:6828320   | CDCA3    | UTR3        |                                                                        | - | TtoA  | 0.125  | 0.1538 | 4  | 2  | [14,16] |
| chr11:64601523  | CDCA5    | UTR3        |                                                                        | - | AttoG | 0.1    | 0.1176 | 3  | 2  | [10,17] |
| chr2:123936868  | CDCA7    | coding_exon | ENST00000306721:Sto*;ENST00000347703:Sto*;ENST00000392567:Sto*;ENST000 | + | CtoA  | 0.1    | 0.1081 | 3  | 2  | [20,38] |
| chr7:21914588   | CDCA7L   | coding_exon | ENST00000356195:DtoE;ENST00000373934:DtoE;ENST00000396561:DtoE;ENST000 | - | TtoG  | 0.1    | 0.1    | 2  | 2  | [10,10] |
| chr3:120618599  | CDGAP    | UTR3        |                                                                        | + | TtoC  | 0.1    | 0.1176 | 8  | 2  | [10,17] |
| chr10:73180522  | CDH23    | coding_exon |                                                                        | + | TtoC  | 0.1    | 0.1    | 2  | 2  | [10,10] |
| chr12:54652560  | CDK2     | UTR3        |                                                                        | + | AttoG | 0.1053 | 0.1176 | 3  | 2  | [17,19] |
| chr11:67030584  | CDK2AP2  | UTR3        |                                                                        | - | CtoA  | 0.125  | 0.125  | 4  | 2  | [16,16] |
| chr17:27841802  | CDK5R1   | coding_exon | ENST00000313401:NtoK;                                                  | + | TtoA  | 0.1    | 0.2    | 3  | 2  | [10,15] |
| chr17:27842309  | CDK5R1   | coding_exon |                                                                        | + | TtoA  | 0.1    | 0.1111 | 4  | 2  | [10,18] |
| chr20:31431106  | CDK5RAP1 | coding_exon | ENST00000346416:NtoI;ENST00000357886:NtoI;ENST00000452723:NtoI;        | - | AttoT | 0.1    | 0.1176 | 3  | 2  | [10,17] |
| chr20:31437165  | CDK5RAP1 | coding_exon |                                                                        | - | TtoC  | 0.1333 | 0.1429 | 5  | 2  | [14,15] |
| chr9:12202902   | CDK5RAP2 | coding_exon | ENST00000349780:LtoQ;ENST00000359309:LtoQ;ENST00000360190:LtoQ;ENST000 | - | TtoA  | 0.1    | 0.1818 | 4  | 2  | [10,12] |
| chr9:122347879  | CDK5RAP2 | coding_exon | ENST00000349780:LtoH;ENST00000359309:LtoH;ENST00000360190:LtoH;ENST000 | - | TtoA  | 0.1    | 0.1    | 2  | 2  | [10,10] |
| chr9:122191138  | CDK5RAP2 | UTR3        |                                                                        | - | TtoC  | 0.1    | 0.125  | 3  | 2  | [11,16] |
| chr9:122191233  | CDK5RAP2 | UTR3        |                                                                        | - | TtoC  | 0.1    | 0.2727 | 7  | 3  | [10,19] |
| chr17:43406808  | CDK5RAP3 | coding_exon | ENST00000338399:YtoF;                                                  | + | AttoT | 0.125  | 0.1905 | 10 | 3  | [21,30] |
| chr17:43406811  | CDK5RAP3 | coding_exon | ENST00000338399:LtoS;                                                  | + | TtoC  | 0.1053 | 0.5714 | 20 | 10 | [14,76] |
| chr17:43408016  | CDK5RAP3 | coding_exon |                                                                        | + | GtoA  | 0.1064 | 0.2917 | 11 | 4  | [24,86] |
| chr7:92075030   | CDK6     | UTR3        |                                                                        | - | AttoC | 0.1    | 0.1538 | 6  | 3  | [10,20] |
| chr7:92075308   | CDK6     | UTR3        |                                                                        | - | TtoA  | 0.1    | 0.1    | 2  | 2  | [10,10] |
| chr7:92076887   | CDK6     | UTR3        |                                                                        | - | CtoG  | 0.1    | 0.2    | 5  | 3  | [10,20] |
| chr9:129592607  | CDK9     | UTR3        |                                                                        | + | AttoG | 0.1    | 0.1    | 5  | 2  | [10,10] |
| chr6:20954285   | CDKAL1   | coding_exon |                                                                        | + | GtoA  | 0.1    | 0.2    | 3  | 2  | [10,20] |
| chr6:20642741   | CDKAL1   | UTR5        |                                                                        | + | TtoG  | 0.1    | 0.1    | 2  | 2  | [10,10] |
| chr6:36754477   | CDKN1A   | mixed       |                                                                        | + | AttoG | 0.1538 | 0.2143 | 6  | 3  | [13,14] |
| chr6:36754479   | CDKN1A   | mixed       |                                                                        | + | CtoG  | 0.1282 | 0.4583 | 3  | 2  | [24,41] |
| chr6:36754481   | CDKN1A   | mixed       |                                                                        | + | GtoT  | 0.2131 | 0.6061 | 6  | 5  | [36,85] |
| chr12:12766270  | CDKN1B   | UTR3        |                                                                        | + | AttoC | 0.1    | 0.1429 | 2  | 2  | [10,14] |
| chr12:12766523  | CDKN1B   | UTR3        |                                                                        | + | AttoG | 0.1    | 0.1538 | 2  | 2  | [10,13] |
| chr9:21960979   | CDKN2A   | coding_exon | ENST00000304494:StoA;ENST00000446177:StoA;                             | - | TtoG  | 1      | 1      | 3  | 3  | [20,50] |
| chr16:22265170  | CDR2     | UTR3        |                                                                        | - | AttoG | 0.1    | 0.2222 | 6  | 2  | [10,10] |
| chr20:5119333   | CDS2     | UTR3        |                                                                        | + | TtoA  | 0.1    | 0.1333 | 4  | 2  | [11,15] |
| chr16:87402419  | CDT1     | UTR3        |                                                                        | + | AttoG | 0.125  | 0.25   | 7  | 7  | [14,24] |
| chr16:87402420  | CDT1     | UTR3        |                                                                        | + | CtoA  | 0.1053 | 0.25   | 7  | 3  | [17,25] |
| chr3:134788765  | CDV3     | mixed       |                                                                        | + | AttoG | 0.1176 | 0.125  | 5  | 2  | [16,17] |
| chr3:134791796  | CDV3     | UTR3        |                                                                        | + | TtoA  | 0.6    | 1      | 2  | 2  | [10,11] |
| chr19:46733793  | CEACAM21 | UTR5        |                                                                        | + | AttoG | 0.1538 | 0.4    | 5  | 3  | [15,26] |
| chr19:46733983  | CEACAM21 | UTR5        |                                                                        | + | CtoT  | 0.1053 | 0.1333 | 5  | 2  | [15,38] |
| chr19:38562627  | CEBPG    | mixed       |                                                                        | + | TtoG  | 0.1    | 0.1818 | 2  | 2  | [10,11] |
| chr22:15998775  | CECR5    | UTR3        |                                                                        | - | AttoG | 0.1071 | 0.125  | 5  | 2  | [24,29] |
| chr2:26857130   | CENPA    | mixed       |                                                                        | + | GtoA  | 0.1    | 0.1    | 2  | 2  | [10,10] |
| chr2:26870480   | CENPA    | UTR3        |                                                                        | + | TtoC  | 0.1    | 0.2    | 2  | 2  | [10,10] |
| chr4:68023226   | CENPC1   | coding_exon |                                                                        | - | TtoC  | 0.1    | 0.25   | 3  | 2  | [10,12] |
| chr4:104288124  | CENPE    | coding_exon |                                                                        | - | AttoG | 0.1    | 0.1538 | 2  | 2  | [10,13] |
| chr1:212903624  | CENPF    | coding_exon | ENST00000366955:VtoA;                                                  | + | TtoC  | 0.1053 | 0.2041 | 9  | 4  | [10,49] |
| chr1:212886465  | CENPF    | coding_exon | ENST00000366955:LtoR;                                                  | + | TtoG  | 0.1    | 0.1    | 2  | 2  | [10,10] |
| chr1:212883055  | CENPF    | coding_exon | ENST00000366955:LtoP;                                                  | + | TtoC  | 0.1    | 0.125  | 4  | 2  | [10,16] |
| chr1:212897109  | CENPF    | coding_exon | ENST00000366955:GtoE;                                                  | + | GtoA  | 0.1212 | 0.15   | 3  | 2  | [20,33] |
| chr1:212887176  | CENPF    | coding_exon | ENST00000366955:EtoG;                                                  | + | AttoG | 0.1    | 0.1    | 3  | 2  | [10,20] |
| chr1:212886682  | CENPF    | coding_exon |                                                                        | + | TtoC  | 0.1    | 0.1    | 4  | 3  | [10,10] |
| chr5:68541536   | CENPH    | UTR3        |                                                                        | + | AttoG | 0.1333 | 0.2    | 3  | 2  | [11,15] |
| chr16:79619719  | CENPN    | coding_exon | ENST00000305850:NtoD;ENST00000428963:NtoD;ENST00000439957:NtoD;        | + | AttoG | 0.1    | 0.1818 | 2  | 2  | [10,11] |
| chr16:79603097  | CENPN    | coding_exon | ENST00000299572:MtoV;ENST00000305850:MtoV;ENST00000393335:MtoV;ENST    | + | AttoG | 0.1    | 0.1    | 4  | 2  | [10,20] |
| chr2:24897247   | CENPO    | UTR3        |                                                                        | + | AttoC | 0.1    | 0.1429 | 2  | 2  | [10,14] |
| chr16:66420835  | CENPT    | coding_exon |                                                                        | - | TtoC  | 0.1    | 0.1538 | 3  | 2  | [10,13] |
| chr16:66422620  | CENPT    | mixed       |                                                                        | - | AttoG | 0.1    | 0.2    | 9  | 5  | [10,30] |
| chr17:16186622  | CENPV    | UTR3        |                                                                        | - | TtoA  | 0.1    | 0.1818 | 2  | 2  | [10,11] |
| chr9:122964270  | CEP110   | mixed       |                                                                        | + | TtoC  | 0.1    | 0.1    | 2  | 2  | [10,20] |
| chr15:46818393  | CEP152   | coding_exon | ENST00000399334:Sto*;                                                  | - | CtoA  | 0.1    | 0.1    | 3  | 2  | [10,10] |
| chr11:116783878 | CEP164   | coding_exon | ENST00000278935:StoP;ENST00000444913:StoP;                             | + | TtoC  | 0.1    | 0.1429 | 3  | 2  | [14,20] |
| chr11:116747167 | CEP164   | coding_exon |                                                                        | + | TtoC  | 0.1    | 0.1538 | 5  | 2  | [10,13] |
| chr11:116788303 | CEP164   | UTR3        |                                                                        | + | TtoC  | 0.1    | 0.1667 | 2  | 2  | [10,12] |
| chr11:116788362 | CEP164   | UTR3        |                                                                        | + | GtoC  | 0.1    | 0.1    | 3  | 2  | [10,10] |
| chr18:13059848  | CEP192   | coding_exon | ENST00000325971:EtoK;ENST00000399863:EtoK;ENST00000430049:EtoK;        | + | GtoA  | 0.1    | 0.1667 | 2  | 2  | [10,12] |
| chr18:13104239  | CEP192   | mixed       |                                                                        | + | TtoC  | 0.1    | 0.3333 | 2  | 2  | [10,12] |
| chr18:13106479  | CEP192   | mixed       |                                                                        | + | AttoG | 0.1    | 0.1818 | 8  | 3  | [10,22] |
| chr20:33542567  | CEP250   | coding_exon | ENST00000342580:VtoA;ENST00000356095:VtoA;ENST00000397527:VtoA;        | + | TtoC  | 0.1    | 0.1    | 2  | 2  | [10,10] |
| chr20:33545853  | CEP250   | coding_exon | ENST00000342580:QtoR;ENST00000356095:QtoR;ENST00000397527:QtoR;        | + | AttoG | 0.1    | 0.1429 | 2  | 2  | [10,14] |
| chr20:3355925   | CEP250   | coding_exon | ENST00000342580:QtoR;ENST00000356095:QtoR;ENST00000397527:QtoR;        | + | AttoG | 0.1    | 0.1176 | 3  | 2  | [10,18] |
| chr20:33549110  | CEP250   | coding_exon | ENST00000342580:LtoQ;ENST00000356095:LtoQ;ENST00000397527:LtoQ;        | + | TtoA  | 0.1    | 0.1    | 2  | 2  | [10,10] |
| chr20:33545835  | CEP250   | coding_exon | ENST00000342580:EtoG;ENST00000356095:EtoG;ENST00000397527:EtoG;        | + | AttoG | 0.1    | 0.1    | 2  | 2  | [10,10] |
| chr20:33551293  | CEP250   | coding_exon | ENST00000342580:DtoG;ENST00000356095:DtoG;ENST00000397527:DtoG;        | + | AttoG | 0.1    | 0.1333 | 2  | 2  | [10,15] |
| chr1:178329449  | CEP350   | coding_exon | ENST00000367607:VtoE;ENST00000419991:VtoE;                             | + | TtoA  | 0.1    | 0.1111 | 2  | 2  | [10,18] |
| chr1:178346852  | CEP350   | coding_exon | ENST00000367607:LtoQ;ENST00000419991:LtoQ;                             | + | TtoA  | 0.1    | 0.1818 | 3  | 2  | [10,11] |
| chr1:178256546  | CEP350   | coding_exon | ENST00000367607:LtoH;ENST00000419991:LtoH;                             | + | TtoA  | 0.1    | 0.1    | 2  | 2  | [10,10] |
| chr1:178350561  | CEP350   | UTR3        |                                                                        | + | TtoC  | 0.1    | 0.1818 | 2  | 2  | [11,12] |
| chr10:95278253  | CEP55    | UTR3        |                                                                        | + | GtoA  | 0.1176 | 0.15   | 6  | 2  | [17,20] |
| chr11:95172197  | CEP57    | coding_exon | ENST00000325486:RtoG;ENST00000325542:RtoG;                             | + | AttoG | 0.1    | 0.1538 | 3  | 2  | [10,13] |
| chr1:111527081  | CEPT1    | coding_exon |                                                                        | + | TtoA  | 0.1    | 0.1176 | 5  | 2  | [11,17] |
| chr22:45459943  | CERK     | UTR3        |                                                                        | - | TtoC  | 0.1053 | 0.1429 | 5  | 2  | [14,19] |
| chr2:182110069  | CERKL    | UTR3        |                                                                        | - | TtoC  | 0.1176 | 0.1429 | 5  | 2  | [14,18] |
| chr2:182110539  | CERKL    | UTR3        |                                                                        | - | TtoC  | 0.125  | 0.4545 | 9  | 2  | [11,24] |
| chr16:65529443  | CES2     | coding_exon | ENST00000317091:QtoE;ENST00000417689:QtoE;                             | + | CtoG  | 0.1111 | 0.125  | 4  | 2  | [18,24] |
| chr16:65534183  | CES2     | coding_exon | ENST00000317091:NtoD;                                                  | + | AttoG | 0.1    | 0.1111 | 4  | 2  | [10,18] |
| chr16:65535454  | CES2     | UTR3        |                                                                        | + | TtoC  | 0.1    | 0.2    | 7  | 3  | [10,20] |
| chr16:65526073  | CES2     | UTR5        |                                                                        | + | TtoC  | 0.1    | 0.2222 | 4  | 3  | [10,10] |
| chr5:89725646   | CETN3    | coding_exon |                                                                        | - | TtoC  | 0.1    | 0.2    | 5  | 3  | [10,15] |

|                 |         |             |                                                                                                                                                                                               |   |      |        |        |    |   |          |
|-----------------|---------|-------------|-----------------------------------------------------------------------------------------------------------------------------------------------------------------------------------------------|---|------|--------|--------|----|---|----------|
| chr2:201709339  | CFLAR   | coding_exon | ENST00000395148:GtoW;                                                                                                                                                                         | + | GtoT | 0.1    | 0.1    | 2  | 2 | [10,10]  |
| chr3:88186689   | CGGBP1  | mixed       |                                                                                                                                                                                               | - | TtoG | 0.1    | 0.1034 | 2  | 2 | [10,29]  |
| chr21:36707199  | CHAF1B  | coding_exon | ENST00000314103:StoR;                                                                                                                                                                         | + | TtoG | 0.1    | 0.1    | 3  | 2 | [10,10]  |
| chr22:22438021  | CHCHD10 | UTR3        |                                                                                                                                                                                               | - | AtoG | 0.1    | 0.1538 | 3  | 2 | [10,13]  |
| chr7:56141552   | CHCHD2  | coding_exon | ENST00000395422:StoR;                                                                                                                                                                         | - | AtoC | 0.1053 | 0.125  | 3  | 3 | [16,19]  |
| chr7:56139606   | CHCHD2  | coding_exon | ENST00000395422:AtoE;                                                                                                                                                                         | - | CtoA | 0.1333 | 0.1579 | 4  | 2 | [15,20]  |
| chr7:56136830   | CHCHD2  | UTR3        |                                                                                                                                                                                               | - | TtoG | 0.1132 | 0.1509 | 13 | 5 | [42,59]  |
| chr7:56137013   | CHCHD2  | UTR3        |                                                                                                                                                                                               | - | GtoC | 0.1053 | 0.12   | 4  | 2 | [19,26]  |
| chr7:56137022   | CHCHD2  | UTR3        |                                                                                                                                                                                               | - | TtoC | 0.102  | 0.1406 | 12 | 4 | [32,100] |
| chr7:132120345  | CHCHD3  | UTR3        |                                                                                                                                                                                               | - | AtoG | 0.1    | 0.1395 | 6  | 3 | [10,43]  |
| chr8:57287998   | CHCHD7  | mixed       |                                                                                                                                                                                               | + | AtoG | 0.1    | 0.1    | 2  | 2 | [10,10]  |
| chr11:73261499  | CHCHD8  | mixed       |                                                                                                                                                                                               | - | GtoA | 0.1    | 0.2    | 5  | 3 | [10,10]  |
| chr5:98236081   | CHD1    | coding_exon | ENST00000284049:HtoR;                                                                                                                                                                         | - | AtoG | 0.1053 | 0.1667 | 4  | 2 | [12,19]  |
| chr5:98233361   | CHD1    | coding_exon | ENST00000284049:DtoE;                                                                                                                                                                         | - | TtoA | 0.1667 | 0.1818 | 3  | 2 | [11,12]  |
| chr5:98233358   | CHD1    | coding_exon |                                                                                                                                                                                               | - | AtoG | 0.1    | 0.3077 | 5  | 3 | [10,13]  |
| chr5:98236134   | CHD1    | coding_exon |                                                                                                                                                                                               | - | TtoC | 0.1429 | 0.1538 | 4  | 2 | [13,14]  |
| chr5:98218942   | CHD1    | UTR3        |                                                                                                                                                                                               | - | AtoG | 0.1    | 0.1111 | 2  | 2 | [10,45]  |
| chr1:145229803  | CHD1L   | coding_exon | ENST00000369258:GtoD;ENST00000369259:GtoD;ENST00000431239:GtoD;                                                                                                                               | + | GtoA | 0.125  | 0.1818 | 4  | 2 | [11,16]  |
| chr15:91286133  | CHD2    | coding_exon | ENST00000309818:QtoR;ENST00000394196:QtoR;ENST00000420239:QtoR;                                                                                                                               | + | AtoG | 0.1    | 0.1071 | 4  | 2 | [10,28]  |
| chr15:91316139  | CHD2    | coding_exon | ENST00000309818:Etog;ENST00000394196:Etog;                                                                                                                                                    | + | AtoG | 0.1    | 0.1    | 2  | 2 | [10,10]  |
| chr15:91283941  | CHD2    | coding_exon |                                                                                                                                                                                               | + | TtoA | 0.1212 | 0.3333 | 9  | 2 | [10,33]  |
| chr15:91369477  | CHD2    | UTR3        |                                                                                                                                                                                               | + | CtoG | 0.16   | 0.25   | 5  | 2 | [12,25]  |
| chr15:91370630  | CHD2    | UTR3        |                                                                                                                                                                                               | + | TtoG | 0.1071 | 0.1935 | 6  | 3 | [28,35]  |
| chr15:91371324  | CHD2    | UTR3        |                                                                                                                                                                                               | + | TtoC | 0.1154 | 0.1538 | 4  | 2 | [13,26]  |
| chr15:91371351  | CHD2    | UTR3        |                                                                                                                                                                                               | + | TtoC | 0.1111 | 0.1333 | 5  | 2 | [16,18]  |
| chr17:7749996   | CHD3    | coding_exon | ENST00000330494:VtoG;ENST00000358181:VtoG;ENST00000380358:VtoG;ENST00000330494:AtoG;ENST00000358181:AtoG;ENST00000380358:AtoG;ENST00000330494:StoR;ENST00000358181:StoR;ENST00000380358:StoR; | + | TtoG | 0.1    | 0.2    | 4  | 2 | [10,16]  |
| chr17:7753229   | CHD3    | coding_exon | ENST00000330494:AtoG;ENST00000358181:AtoG;ENST00000380358:AtoG;ENST00000330494:StoR;ENST00000358181:StoR;ENST00000380358:StoR;                                                                | + | CtoG | 0.1    | 0.1    | 4  | 2 | [10,10]  |
| chr12:6549583   | CHD4    | UTR3        |                                                                                                                                                                                               | - | GtoA | 0.1    | 0.1053 | 6  | 2 | [10,19]  |
| chr12:6549585   | CHD4    | UTR3        |                                                                                                                                                                                               | - | AtoG | 0.1667 | 0.1765 | 4  | 2 | [12,17]  |
| chr12:6549598   | CHD4    | UTR3        |                                                                                                                                                                                               | - | GtoA | 0.1    | 0.1591 | 7  | 3 | [14,44]  |
| chr12:6549614   | CHD4    | UTR3        |                                                                                                                                                                                               | - | TtoA | 0.125  | 0.2308 | 14 | 5 | [13,24]  |
| chr12:6549764   | CHD4    | UTR3        |                                                                                                                                                                                               | - | TtoA | 0.1    | 0.1053 | 4  | 2 | [19,30]  |
| chr8:61928506   | CHD7    | coding_exon | ENST00000307121:VtoA;ENST00000423902:VtoA;                                                                                                                                                    | + | TtoC | 0.1053 | 0.2    | 6  | 2 | [19,20]  |
| chr8:61936202   | CHD7    | coding_exon | ENST00000307121:HtoQ;ENST00000423902:HtoQ;                                                                                                                                                    | + | CtoA | 0.1    | 0.1    | 2  | 2 | [10,10]  |
| chr8:61891539   | CHD7    | coding_exon |                                                                                                                                                                                               | + | GtoT | 0.1    | 0.1    | 3  | 2 | [10,10]  |
| chr14:20932930  | CHD8    | coding_exon | ENST00000399982:RtoG;ENST00000430710:RtoG;                                                                                                                                                    | - | CtoG | 0.1    | 0.2222 | 2  | 2 | [10,10]  |
| chr14:20966046  | CHD8    | coding_exon | ENST00000399982:RtoC;ENST00000430710:RtoC;                                                                                                                                                    | - | CtoT | 0.1    | 0.1    | 2  | 2 | [10,10]  |
| chr14:20923485  | CHD8    | UTR3        |                                                                                                                                                                                               | - | GtoA | 0.1111 | 0.1875 | 8  | 5 | [14,27]  |
| chr16:51897748  | CHD9    | coding_exon | ENST00000219084:TtoP;ENST00000398510:TtoP;ENST00000447540:TtoP;ENST00000219084:StoP;ENST00000398510:StoP;ENST00000447540:StoP;ENST00000219084:UtoP;ENST00000398510:UtoP;ENST00000447540:UtoP; | + | AtoC | 0.1    | 0.1    | 2  | 2 | [10,10]  |
| chr16:51916270  | CHD9    | coding_exon | ENST00000219084:StoP;ENST00000398510:StoP;ENST00000447540:StoP;ENST00000219084:UtoP;ENST00000398510:UtoP;ENST00000447540:UtoP;                                                                | + | TtoC | 0.1176 | 0.15   | 5  | 2 | [17,20]  |
| chr16:51913025  | CHD9    | coding_exon |                                                                                                                                                                                               | + | AtoG | 0.1    | 0.1667 | 2  | 2 | [10,12]  |
| chr16:51822915  | CHD9    | mixed       |                                                                                                                                                                                               | + | TtoC | 0.1333 | 0.1667 | 2  | 2 | [12,15]  |
| chr16:51829786  | CHD9    | mixed       |                                                                                                                                                                                               | + | TtoC | 0.1429 | 0.1875 | 2  | 2 | [14,16]  |
| chr11:125002790 | CHEK1   | coding_exon |                                                                                                                                                                                               | + | TtoC | 0.1111 | 0.125  | 5  | 3 | [16,18]  |
| chr22:27425893  | CHEK2   | mixed       |                                                                                                                                                                                               | - | TtoC | 0.1    | 0.2727 | 4  | 3 | [10,15]  |
| chr12:131940090 | CHFR    | coding_exon | ENST00000266880:AtoT;ENST00000315585:AtoT;ENST00000432561:AtoT;ENST00000266880:StoT;ENST00000315585:StoT;ENST00000432561:StoT;                                                                | - | GtoA | 0.1818 | 0.25   | 7  | 6 | [10,25]  |
| chr12:131940091 | CHFR    | coding_exon |                                                                                                                                                                                               | - | AtoG | 0.1538 | 0.3    | 7  | 7 | [10,26]  |
| chr12:131927447 | CHFR    | UTR3        |                                                                                                                                                                                               | - | GtoC | 0.1667 | 0.3077 | 3  | 2 | [12,13]  |
| chr12:131927741 | CHFR    | UTR3        |                                                                                                                                                                                               | - | TtoG | 0.1    | 0.1    | 2  | 2 | [10,10]  |
| chr1:111585505  | CHI3L2  | coding_exon | ENST00000369744:RtoW;ENST00000369748:RtoW;ENST00000393553:RtoW;ENST00000369744:StoW;ENST00000369748:StoW;ENST00000393553:StoW;                                                                | + | CtoT | 0.125  | 1      | 5  | 5 | [12,199] |
| chr1:111573927  | CHI3L2  | mixed       |                                                                                                                                                                                               | + | AtoC | 0.1    | 0.1    | 2  | 2 | [10,10]  |
| chr1:111587578  | CHI3L2  | UTR3        |                                                                                                                                                                                               | + | TtoC | 0.1667 | 0.4545 | 4  | 3 | [11,19]  |
| chr11:859795    | CHID1   | UTR3        |                                                                                                                                                                                               | - | TtoA | 0.1    | 0.2222 | 2  | 2 | [10,10]  |
| chr11:67590534  | CHKA    | coding_exon |                                                                                                                                                                                               | - | AtoG | 0.1    | 0.1    | 5  | 2 | [10,21]  |
| chr22:49366848  | CHKB    | coding_exon | ENST00000406938:StoG;                                                                                                                                                                         | - | AtoG | 0.1    | 0.1111 | 3  | 2 | [10,18]  |
| chr16:88239909  | CHMP1A  | mixed       |                                                                                                                                                                                               | - | AtoC | 0.1176 | 0.1333 | 2  | 2 | [16,17]  |
| chr3:87386981   | CHMP2B  | UTR3        |                                                                                                                                                                                               | + | GtoT | 0.1    | 0.1333 | 2  | 2 | [10,15]  |
| chr14:23748660  | CHMP4A  | UTR3        |                                                                                                                                                                                               | - | TtoA | 0.1    | 0.2    | 5  | 2 | [10,10]  |
| chr14:23748679  | CHMP4A  | UTR3        |                                                                                                                                                                                               | - | TtoA | 0.1    | 0.1    | 3  | 2 | [10,10]  |
| chr20:31905768  | CHMP4B  | UTR3        |                                                                                                                                                                                               | + | AtoG | 0.1    | 0.1667 | 5  | 2 | [10,12]  |
| chr8:23174682   | CHMP7   | UTR3        |                                                                                                                                                                                               | + | CtoG | 0.1818 | 0.2    | 2  | 2 | [10,11]  |
| chr11:89579081  | CHORDC1 | coding_exon | ENST00000320585:QtoR;ENST00000457199:QtoR;                                                                                                                                                    | - | AtoG | 0.1    | 0.2667 | 4  | 3 | [10,15]  |
| chr11:89579083  | CHORDC1 | coding_exon |                                                                                                                                                                                               | - | CtoT | 0.1    | 0.25   | 4  | 2 | [10,12]  |
| chr12:100634647 | CHPT1   | coding_exon | ENST00000229266:TtoS;                                                                                                                                                                         | + | AtoT | 0.2    | 0.2727 | 3  | 2 | [10,11]  |
| chr12:103675453 | CHST11  | coding_exon |                                                                                                                                                                                               | + | TtoC | 0.1    | 0.1    | 3  | 2 | [10,30]  |
| chr15:99535825  | CHSY1   | coding_exon | ENST00000254190:LtoP;                                                                                                                                                                         | - | TtoC | 0.1    | 0.1    | 3  | 2 | [10,10]  |
| chr16:782781    | CHTF18  | coding_exon | ENST00000262315:LtoP;ENST00000317063:LtoP;ENST00000448184:LtoP;ENST00000262315:StoP;ENST00000317063:StoP;ENST00000448184:StoP;                                                                | + | TtoC | 0.1    | 0.1    | 2  | 2 | [10,10]  |
| chr16:781204    | CHTF18  | coding_exon | ENST00000262315:LtoM;ENST00000317063:LtoM;ENST00000455171:LtoM;                                                                                                                               | + | CtoA | 0.1    | 0.1    | 2  | 2 | [10,10]  |
| chr16:781946    | CHTF18  | coding_exon | ENST00000262315:AtoG;ENST00000317063:AtoG;ENST00000455171:AtoG;                                                                                                                               | + | CtoG | 0.125  | 0.2308 | 5  | 2 | [13,16]  |
| chr2:96301012   | CIAO1   | UTR3        |                                                                                                                                                                                               | + | CtoA | 0.1053 | 0.12   | 10 | 2 | [19,25]  |
| chr16:56025530  | CIAPIN1 | coding_exon |                                                                                                                                                                                               | - | CtoA | 0.1111 | 0.125  | 8  | 3 | [16,18]  |
| chr19:47489929  | CIC     | coding_exon | ENST00000160740:RtoK;                                                                                                                                                                         | + | GtoA | 0.1176 | 0.1667 | 7  | 2 | [17,18]  |
| chr19:47491577  | CIC     | UTR3        |                                                                                                                                                                                               | + | TtoG | 0.1154 | 0.1154 | 3  | 2 | [26,26]  |
| chr19:1223788   | CIRBP   | UTR3        |                                                                                                                                                                                               | + | AtoT | 0.1111 | 0.3158 | 9  | 5 | [16,36]  |
| chr19:1224161   | CIRBP   | UTR3        |                                                                                                                                                                                               | + | TtoC | 0.1    | 0.125  | 12 | 3 | [17,20]  |
| chr16:67724961  | CIRH1A  | coding_exon | ENST00000314423:VtoG;ENST00000352319:VtoG;ENST00000453167:VtoG;                                                                                                                               | + | TtoG | 0.1176 | 0.2609 | 7  | 4 | [16,24]  |
| chr12:118634535 | CIT     | coding_exon | ENST00000261833:DtoG;ENST00000392520:DtoG;ENST00000392521:DtoG;                                                                                                                               | - | AtoG | 0.1    | 0.1    | 2  | 2 | [10,11]  |
| chr13:51946049  | CKAP2   | coding_exon | ENST00000258607:Etog;ENST00000378037:Etog;ENST00000490903:Etog;                                                                                                                               | + | AtoG | 0.1    | 0.1667 | 4  | 2 | [12,20]  |
| chr12:105156624 | CKAP4   | UTR3        |                                                                                                                                                                                               | - | AtoG | 0.1818 | 0.2727 | 5  | 2 | [11,11]  |
| chr11:46729608  | CKAP5   | mixed       |                                                                                                                                                                                               | - | TtoC | 0.1    | 0.1333 | 3  | 2 | [10,15]  |
| chr11:46754439  | CKAP5   | mixed       |                                                                                                                                                                                               | - | TtoC | 0.1    | 0.16   | 3  | 2 | [10,25]  |
| chr9:91121381   | CKS2    | UTR3        |                                                                                                                                                                                               | + | TtoA | 0.2    | 0.2143 | 9  | 2 | [15,21]  |
| chr2:121921385  | CLASP1  | coding_exon | ENST00000263710:LtoS;ENST00000397587:LtoS;ENST00000409078:LtoS;ENST00000263710:StoS;ENST00000397587:StoS;ENST00000409078:StoS;                                                                | - | TtoC | 0.1154 | 0.2    | 4  | 3 | [10,26]  |
| chr2:122001886  | CLASP1  | coding_exon |                                                                                                                                                                                               | - | TtoC | 0.1    | 0.1333 | 2  | 2 | [10,15]  |
| chr2:122079747  | CLASP1  | mixed       |                                                                                                                                                                                               | - | GtoA | 0.1667 | 0.1667 | 6  | 2 | [18,18]  |
| chr2:121813765  | CLASP1  | UTR3        |                                                                                                                                                                                               | - | GtoA | 0.1333 | 0.2143 | 11 | 7 | [11,24]  |
| chr3:33561293   | CLASP2  | coding_exon |                                                                                                                                                                                               | - | AtoG | 0.1176 | 0.2    | 2  | 2 | [10,17]  |
| chr1:109276646  | CLCC1   | mixed       |                                                                                                                                                                                               | - | AtoG | 0.1    | 0.3    | 4  | 3 | [10,20]  |
| chr1:109274287  | CLCC1   | UTR3        |                                                                                                                                                                                               | - | AtoC | 0.1    | 0.1176 | 2  | 2 | [10,17]  |
| chr4:170864926  | CLCN3   | coding_exon | ENST00000347613:StoV;ENST00000360642:StoV;                                                                                                                                                    | + | AtoG | 0.1    | 0.1    | 2  | 2 | [10,10]  |
| chr16:1436357   | CLCN7   | UTR3        |                                                                                                                                                                                               | - | GtoC | 0.1    | 0.1    | 2  | 2 | [10,10]  |
| chr16:11183319  | CLEC16A | UTR3        |                                                                                                                                                                                               | + | TtoC | 0.1    | 0.1    | 2  | 2 | [10,10]  |
| chr12:9738756   | CLEC2D  | UTR3        |                                                                                                                                                                                               | + | AtoG | 0.1042 | 0.1429 | 9  | 2 | [14,48]  |
| chr12:9766435   | CLECL1  | UTR3        |                                                                                                                                                                                               | - | AtoG | 0.1    | 0.1429 | 5  | 2 | [20,21]  |
| chr6:31806360   | CLIC1   | UTR3        |                                                                                                                                                                                               | - | TtoA | 0.1818 | 0.2778 | 3  | 2 | [11,19]  |
| chr6:31806393   | CLIC1   | UTR3        |                                                                                                                                                                                               | - | TtoC | 0.1206 | 0.1579 | 5  | 2 | [61,148] |

|                 |          |             |                                                                                     |   |      |        |        |    |    |          |
|-----------------|----------|-------------|-------------------------------------------------------------------------------------|---|------|--------|--------|----|----|----------|
| chr5:157146393  | CLINT1   | UTR3        |                                                                                     | - | TtoC | 0.1    | 0.2    | 6  | 3  | [10,25]  |
| chr12:121378650 | CLIP1    | coding_exon | ENST00000302528:Etok;ENST00000358808:Etok;ENST00000361654:Etok;ENST00000361654:Etok | - | GtoA | 0.1818 | 0.2    | 4  | 2  | [11,15]  |
| chr12:121324633 | CLIP1    | coding_exon |                                                                                     | - | CtoT | 0.1    | 0.1111 | 3  | 2  | [10,18]  |
| chr12:121324642 | CLIP1    | coding_exon |                                                                                     | - | AtoG | 0.1    | 0.1    | 2  | 2  | [10,10]  |
| chr12:121367263 | CLIP1    | coding_exon |                                                                                     | - | AtoG | 0.1    | 0.1667 | 2  | 2  | [10,12]  |
| chr12:121378890 | CLIP1    | coding_exon |                                                                                     | - | TtoC | 0.1667 | 0.2    | 2  | 2  | [11,12]  |
| chr7:73458195   | CLIP2    | UTR3        |                                                                                     | + | TtoC | 0.1379 | 0.1538 | 4  | 2  | [31,40]  |
| chr2:29210099   | CLIP4    | coding_exon | ENST00000320081:WtoR;ENST00000379543:WtoR;ENST00000401605:WtoR;ENST00000401605:WtoR | + | TtoC | 0.1    | 0.1    | 7  | 2  | [10,10]  |
| chr2:201433156  | CLK1     | coding_exon | ENST00000321356:StoR;ENST00000434813:StoR;                                          | - | AtoC | 0.1    | 0.1    | 2  | 2  | [10,10]  |
| chr2:201430781  | CLK1     | coding_exon | ENST00000321356:LtoH;ENST00000357369:LtoH;ENST00000409769:LtoH;ENST00000409769:LtoH | - | TtoA | 0.1    | 0.1333 | 3  | 2  | [10,15]  |
| chr2:201434207  | CLK1     | coding_exon | ENST00000321356:GtoE;ENST00000357369:GtoE;ENST00000434813:GtoE;                     | - | GtoA | 0.1    | 0.1667 | 9  | 4  | [10,26]  |
| chr15:72709461  | CLK3     | UTR3        |                                                                                     | + | AtoG | 0.1    | 0.1154 | 2  | 2  | [10,57]  |
| chr12:91338919  | CLLU1O5  | coding_exon | ENST00000378487:*toQ;                                                               | - | TtoC | 0.1    | 0.2    | 3  | 3  | [10,15]  |
| chr16:28405406  | CLN3     | coding_exon | ENST00000354630:YtoS;ENST00000355477:YtoS;ENST00000359984:YtoS;ENST00000359984:YtoS | - | AtoC | 0.1    | 0.1    | 2  | 2  | [10,10]  |
| chr11:57183883  | CLP1     | coding_exon | ENST00000302731:VtoA;ENST00000438099:VtoA;                                          | + | TtoC | 0.1    | 0.1538 | 4  | 2  | [10,13]  |
| chr11:57184884  | CLP1     | coding_exon | ENST00000302731:CtoW;ENST00000438099:CtoW;                                          | + | TtoG | 0.1818 | 0.2308 | 3  | 2  | [11,13]  |
| chr11:57185046  | CLP1     | coding_exon |                                                                                     | + | TtoA | 0.1    | 0.1    | 3  | 2  | [10,10]  |
| chr11:71681264  | CLPB     | UTR3        |                                                                                     | - | CtoG | 0.1    | 0.1    | 3  | 2  | [10,10]  |
| chr19:6319885   | CLPP     | UTR3        |                                                                                     | + | TtoC | 0.1053 | 0.2    | 4  | 2  | [11,19]  |
| chr15:63246143  | CLPX     | coding_exon | ENST00000300107:HtoR;                                                               | - | AtoG | 0.1    | 0.1    | 3  | 2  | [10,10]  |
| chr15:63259552  | CLPX     | coding_exon |                                                                                     | - | TtoC | 0.1    | 0.1053 | 3  | 2  | [10,19]  |
| chr1:36001348   | CLSPN    | coding_exon |                                                                                     | - | GtoA | 0.125  | 0.2    | 3  | 2  | [10,16]  |
| chr1:9732172    | CLSTN1   | coding_exon | ENST00000361311:TtoP;ENST00000377288:TtoP;ENST00000377298:TtoP;                     | - | AtoC | 0.1333 | 0.1429 | 2  | 2  | [14,15]  |
| chr1:9711696    | CLSTN1   | UTR3        |                                                                                     | - | TtoC | 0.1    | 0.1111 | 11 | 2  | [18,20]  |
| chr1:9712103    | CLSTN1   | UTR3        |                                                                                     | - | AtoC | 0.125  | 0.1765 | 2  | 2  | [17,48]  |
| chr12:7201362   | CLSTN3   | coding_exon | ENST00000266546:StoR;ENST00000331148:StoR;                                          | + | CtoA | 0.1    | 0.1    | 3  | 2  | [10,10]  |
| chr12:7176996   | CLSTN3   | coding_exon |                                                                                     | + | GtoC | 0.1    | 0.2    | 4  | 2  | [10,15]  |
| chr17:55076590  | CLTC     | coding_exon | ENST00000269122:IttoV;ENST00000393043:IttoV;                                        | + | AtoG | 0.1111 | 0.1538 | 3  | 2  | [18,26]  |
| chr17:55126822  | CLTC     | UTR3        |                                                                                     | + | AtoG | 0.1071 | 0.1081 | 8  | 2  | [38,56]  |
| chr6:25205379   | CMAH     | coding_exon | ENST00000377989:DtoG;ENST00000377993:DtoG;ENST00000436589:DtoG;                     | - | AtoG | 0.1    | 0.1    | 2  | 2  | [10,10]  |
| chr12:107209101 | CMKLR1   | UTR3        |                                                                                     | - | GtoA | 0.1    | 0.1    | 2  | 2  | [10,10]  |
| chr1:47613509   | CMPK1    | mixed       |                                                                                     | + | TtoC | 0.125  | 0.1667 | 3  | 2  | [12,17]  |
| chr1:47616993   | CMPK1    | UTR3        |                                                                                     | + | AtoG | 0.1333 | 0.4545 | 7  | 4  | [11,15]  |
| chr16:65204919  | CMTM3    | UTR3        |                                                                                     | + | TtoA | 0.1    | 0.1    | 2  | 2  | [10,10]  |
| chr3:32498322   | CMTM7    | mixed       |                                                                                     | + | AtoG | 0.1071 | 0.1333 | 7  | 2  | [28,45]  |
| chr3:32498346   | CMTM7    | mixed       |                                                                                     | + | AtoG | 0.1111 | 0.1176 | 4  | 2  | [17,27]  |
| chr3:32499254   | CMTM7    | mixed       |                                                                                     | + | TtoC | 0.1875 | 0.2105 | 4  | 3  | [16,20]  |
| chr3:32471328   | CMTM7    | UTR3        |                                                                                     | + | TtoC | 0.129  | 0.2727 | 3  | 2  | [11,31]  |
| chr3:130372816  | CNBP     | coding_exon | ENST00000307433:VtoD;ENST00000441626:VtoD;ENST00000446936:VtoD;                     | - | TtoA | 0.4444 | 0.8824 | 14 | 14 | [10,31]  |
| chr3:130372812  | CNBP     | coding_exon | ENST00000307433:Etod;ENST00000441626:Etod;ENST00000446936:Etod;ENST00000446936:Etod | - | AtoT | 0.1039 | 0.2069 | 18 | 16 | [18,143] |
| chr3:130372980  | CNBP     | coding_exon | ENST00000307433:DtoE;ENST00000393290:DtoE;ENST00000422453:DtoE;ENST00000422453:DtoE | - | TtoG | 0.1087 | 0.1304 | 16 | 2  | [70,276] |
| chr3:130369543  | CNBP     | UTR3        |                                                                                     | - | GtoC | 0.1    | 0.1    | 3  | 2  | [10,10]  |
| chr3:130371109  | CNBP     | UTR3        |                                                                                     | - | GtoA | 0.1    | 0.1463 | 14 | 5  | [31,88]  |
| chr3:130371110  | CNBP     | UTR3        |                                                                                     | - | AtoG | 0.1026 | 0.1053 | 9  | 2  | [39,39]  |
| chr18:70331924  | CNDP2    | coding_exon | ENST00000324262:HtoP;ENST00000324301:HtoP;                                          | + | AtoC | 0.1744 | 0.2292 | 7  | 3  | [48,87]  |
| chr18:70331922  | CNDP2    | coding_exon |                                                                                     | + | GtoC | 0.1    | 0.1205 | 3  | 2  | [60,83]  |
| chr18:70318149  | CNDP2    | UTR5        |                                                                                     | + | AtoC | 0.1111 | 0.1111 | 5  | 2  | [73,81]  |
| chr19:988983    | CNN2     | UTR3        |                                                                                     | + | CtoT | 0.1026 | 0.2593 | 8  | 5  | [17,78]  |
| chr2:96858162   | CNNM3    | coding_exon | ENST00000305510:KtoQ;ENST00000377060:KtoQ;ENST00000424641:KtoQ;                     | + | AtoC | 0.1    | 0.1429 | 6  | 2  | [10,14]  |
| chr2:96858462   | CNNM3    | coding_exon |                                                                                     | + | TtoG | 0.1053 | 0.1667 | 6  | 2  | [12,19]  |
| chr2:96838069   | CNNM4    | coding_exon | ENST00000377075:LtoV;                                                               | + | CtoG | 0.1    | 0.1    | 2  | 2  | [10,10]  |
| chr2:96839623   | CNNM4    | UTR3        |                                                                                     | + | TtoC | 0.1176 | 0.2    | 2  | 2  | [10,17]  |
| chr2:96840973   | CNNM4    | UTR3        |                                                                                     | + | AtoG | 0.1    | 0.2    | 2  | 2  | [10,10]  |
| chr16:57114906  | CNOT1    | coding_exon |                                                                                     | - | TtoC | 0.125  | 0.1364 | 2  | 2  | [16,44]  |
| chr16:57136844  | CNOT1    | mixed       |                                                                                     | - | AtoC | 0.1    | 0.1538 | 3  | 2  | [26,50]  |
| chr16:57136847  | CNOT1    | mixed       |                                                                                     | - | AtoC | 0.1    | 0.1714 | 4  | 2  | [20,35]  |
| chr3:32725262   | CNOT10   | coding_exon | ENST00000328834:YtoN;ENST00000331889:YtoN;ENST00000435630:YtoN;ENST00000435630:YtoN | + | TtoA | 0.1    | 0.125  | 3  | 2  | [10,16]  |
| chr3:32736615   | CNOT10   | coding_exon |                                                                                     | + | AtoG | 0.1    | 0.1333 | 2  | 2  | [10,15]  |
| chr12:68991024  | CNOT2    | coding_exon | ENST00000229195:YtoS;ENST00000418359:YtoS;                                          | + | AtoC | 0.1053 | 0.2    | 5  | 3  | [15,19]  |
| chr12:68991023  | CNOT2    | coding_exon | ENST00000229195:YtoH;ENST00000418359:YtoH;                                          | + | TtoC | 0.1111 | 0.1333 | 3  | 2  | [15,18]  |
| chr5:154235498  | CNOT8    | UTR3        |                                                                                     | + | GtoT | 0.1    | 0.1    | 2  | 2  | [10,10]  |
| chr5:154236199  | CNOT8    | UTR3        |                                                                                     | + | TtoA | 0.1    | 0.1538 | 5  | 2  | [10,13]  |
| chr12:54990543  | CNPY2    | UTR3        |                                                                                     | - | AtoG | 0.1    | 0.2857 | 10 | 6  | [10,29]  |
| chr12:54990547  | CNPY2    | UTR3        |                                                                                     | - | TtoC | 0.1176 | 0.125  | 7  | 2  | [16,17]  |
| chr6:43014954   | CNPY3    | UTR3        |                                                                                     | + | AtoG | 0.1    | 0.1429 | 5  | 3  | [10,14]  |
| chr6:88908205   | CNR1     | UTR3        |                                                                                     | - | AtoC | 0.1    | 0.1    | 2  | 2  | [10,10]  |
| chr17:38105038  | CNTNAP1  | UTR3        |                                                                                     | + | TtoC | 0.1    | 0.1786 | 9  | 6  | [18,28]  |
| chr17:7778589   | CNTROB   | mixed       |                                                                                     | + | AtoG | 0.1    | 0.1818 | 3  | 2  | [11,20]  |
| chr17:37971788  | COASY    | UTR3        |                                                                                     | + | AtoG | 0.1    | 0.125  | 2  | 2  | [10,16]  |
| chr9:139286480  | COBRA1   | coding_exon | ENST00000343053:LtoP;                                                               | + | TtoC | 0.1    | 0.1034 | 6  | 3  | [10,30]  |
| chr17:68714527  | COG1     | coding_exon | ENST00000299886:LtoP;ENST00000438720:LtoP;                                          | + | TtoC | 0.1    | 0.1    | 3  | 2  | [10,10]  |
| chr17:68708438  | COG1     | coding_exon |                                                                                     | + | TtoC | 0.1    | 0.1    | 3  | 2  | [10,10]  |
| chr1:228877392  | COG2     | coding_exon | ENST00000366668:YtoN;ENST00000366669:YtoN;                                          | + | TtoA | 0.1    | 0.1765 | 3  | 2  | [10,18]  |
| chr1:228873914  | COG2     | coding_exon |                                                                                     | + | TtoC | 0.1    | 0.1    | 3  | 2  | [10,10]  |
| chr13:45007919  | COG3     | UTR3        |                                                                                     | + | TtoC | 0.1    | 0.1    | 2  | 2  | [10,10]  |
| chr7:106638274  | COG5     | coding_exon | ENST00000297135:StoP;ENST00000347053:StoP;ENST00000393603:StoP;                     | - | TtoC | 0.1333 | 0.1667 | 3  | 2  | [12,15]  |
| chr7:106790099  | COG5     | coding_exon | ENST00000297135:GtoR;ENST00000347053:GtoR;ENST00000393603:GtoR;                     | - | GtoC | 0.1    | 0.1667 | 4  | 2  | [10,12]  |
| chr16:23361390  | COG7     | coding_exon |                                                                                     | - | AtoT | 0.1    | 0.1    | 2  | 2  | [10,10]  |
| chr16:67920028  | COG8     | UTR3        |                                                                                     | - | TtoC | 0.1    | 0.2308 | 6  | 3  | [10,18]  |
| chr5:74705728   | COL4A3BP | UTR3        |                                                                                     | - | GtoA | 0.1429 | 0.1818 | 6  | 4  | [11,27]  |
| chr1:40539561   | COL9A2   | coding_exon |                                                                                     | - | TtoC | 0.1111 | 0.1765 | 4  | 2  | [17,18]  |
| chr2:62216686   | COMMD1   | UTR3        |                                                                                     | + | TtoC | 0.1026 | 0.3529 | 19 | 17 | [14,39]  |
| chr10:22649015  | COMMD3   | UTR3        |                                                                                     | + | CtoA | 0.125  | 0.1579 | 5  | 2  | [19,24]  |
| chr13:74998621  | COMMD6   | UTR3        |                                                                                     | - | AtoG | 0.1111 | 0.2    | 3  | 2  | [11,18]  |
| chr20:30754210  | COMMD7   | UTR3        |                                                                                     | - | CtoA | 0.1    | 0.1429 | 4  | 2  | [10,21]  |
| chr4:47148297   | COMMD8   | UTR3        |                                                                                     | - | AtoG | 0.125  | 0.1333 | 6  | 2  | [15,16]  |
| chr11:36254337  | COMMD9   | coding_exon | ENST00000263401:WtoG;ENST00000452374:WtoG;                                          | - | TtoG | 0.1    | 0.1    | 2  | 2  | [10,10]  |
| chr11:36252695  | COMMD9   | UTR3        |                                                                                     | - | AtoG | 0.1    | 0.1    | 2  | 2  | [10,10]  |
| chr22:18336272  | COMT     | UTR3        |                                                                                     | + | CtoG | 0.1538 | 0.1923 | 2  | 2  | [14,26]  |
| chr10:76663746  | COMTD1   | UTR3        |                                                                                     | - | TtoC | 0.1111 | 0.1818 | 5  | 2  | [11,18]  |
| chr1:158571656  | COPA     | coding_exon | ENST00000241704:HtoQ;ENST00000368069:HtoQ;                                          | - | TtoG | 0.1    | 0.1379 | 2  | 2  | [10,29]  |
| chr3:130479131  | COPG     | UTR3        |                                                                                     | + | TtoA | 0.1429 | 0.1667 | 5  | 2  | [13,14]  |
| chr7:129946502  | COPG2    | coding_exon | ENST00000445977:VtoD;                                                               | - | TtoA | 0.1    | 0.1    | 2  | 2  | [10,10]  |
| chr7:129933562  | COPG2    | mixed       |                                                                                     | - | CtoT | 0.1818 | 0.25   | 2  | 2  | [11,16]  |
| chr15:47213448  | COPS2    | coding_exon | ENST00000299259:StoP;ENST00000388901:StoP;                                          | - | TtoC | 0.1    | 0.1333 | 2  | 2  | [10,15]  |
| chr15:47235065  | COPS2    | coding_exon | ENST00000299259:MtoI;ENST00000388901:MtoI;                                          | - | GtoC | 0.1176 | 0.2    | 5  | 4  | [10,17]  |

|                 |         |             |                                                                                      |   |      |        |        |    |    |          |
|-----------------|---------|-------------|--------------------------------------------------------------------------------------|---|------|--------|--------|----|----|----------|
| chr15:47205952  | COPS2   | UTR3        |                                                                                      | - | AtoG | 0.1    | 0.1667 | 2  | 2  | [10,12]  |
| chr15:47206851  | COPS2   | UTR3        |                                                                                      | - | TtoC | 0.1    | 0.1    | 3  | 2  | [10,10]  |
| chr15:47206862  | COPS2   | UTR3        |                                                                                      | - | AtoG | 0.1034 | 0.1429 | 5  | 2  | [14,29]  |
| chr15:47207109  | COPS2   | UTR3        |                                                                                      | - | TtoA | 0.1154 | 0.1463 | 4  | 2  | [26,42]  |
| chr4:84206687   | COPS4   | coding_exon | ENST00000264389:TtoI;                                                                | + | CtoT | 0.1    | 0.1    | 2  | 2  | [10,20]  |
| chr8:68118052   | COPS5   | coding_exon | ENST00000357849:DtoE;                                                                | - | TtoA | 0.125  | 0.2    | 7  | 3  | [10,25]  |
| chr7:99527467   | COPS6   | UTR3        |                                                                                      | + | CtoA | 0.1176 | 0.3333 | 15 | 9  | [17,33]  |
| chr2:232380578  | COPS7B  | mixed       |                                                                                      | + | TtoG | 0.1    | 0.1    | 2  | 2  | [10,10]  |
| chr2:232380944  | COPS7B  | UTR3        |                                                                                      | + | AtoC | 0.1    | 0.1818 | 4  | 2  | [10,11]  |
| chr2:237663350  | COPS8   | coding_exon | ENST00000354371:VtoA;ENST00000392008:VtoA;ENST00000409334:VtoA;ENST00000409334:VtoA; | + | TtoC | 0.1    | 0.2222 | 2  | 2  | [10,10]  |
| chr2:53031176   | COP21   | UTR3        |                                                                                      | + | AtoC | 0.1154 | 0.1818 | 4  | 2  | [11,26]  |
| chr2:53031593   | COP21   | UTR3        |                                                                                      | + | TtoC | 0.1154 | 0.3    | 9  | 3  | [20,26]  |
| chr2:53031879   | COP21   | UTR3        |                                                                                      | + | AtoG | 0.1    | 0.1333 | 2  | 2  | [10,16]  |
| chr2:53031880   | COP21   | UTR3        |                                                                                      | + | TtoA | 0.1111 | 0.2727 | 2  | 2  | [12,18]  |
| chr2:53005192   | COP21   | UTR5        |                                                                                      | + | GtoC | 0.1    | 0.1176 | 3  | 2  | [10,17]  |
| chr2:198032942  | COQ10B  | coding_exon | ENST00000263960:PtoL;ENST00000409010:PtoL;                                           | + | CtoT | 0.1    | 0.1333 | 2  | 2  | [10,15]  |
| chr9:130136037  | COQ4    | UTR3        |                                                                                      | + | TtoC | 0.1    | 0.1053 | 3  | 2  | [10,58]  |
| chr12:119425495 | COQ5    | UTR3        |                                                                                      | - | TtoA | 0.1    | 0.1    | 4  | 2  | [10,20]  |
| chr14:73497630  | COQ6    | coding_exon | ENST00000238709:WtoL;ENST00000334571:WtoL;ENST00000394026:WtoL;                      | + | GtoT | 0.1    | 0.1176 | 4  | 2  | [10,17]  |
| chr12:107563172 | CORO1C  | UTR3        |                                                                                      | - | TtoA | 0.1053 | 0.1538 | 8  | 3  | [13,19]  |
| chr12:107563438 | CORO1C  | UTR3        |                                                                                      | - | AtoG | 0.1    | 0.2    | 17 | 11 | [13,40]  |
| chr16:4344549   | CORO7   | UTR3        |                                                                                      | - | TtoC | 0.1176 | 0.2727 | 10 | 8  | [10,18]  |
| chr16:83156743  | COTL1   | UTR3        |                                                                                      | - | AtoG | 0.1333 | 0.25   | 6  | 2  | [13,15]  |
| chr17:13946283  | COX10   | coding_exon | ENST00000261643:QtoR;                                                                | + | AtoG | 0.125  | 0.2    | 2  | 2  | [10,16]  |
| chr17:13946284  | COX10   | coding_exon | ENST00000261643:QtoH;                                                                | + | GtoT | 0.1333 | 0.1818 | 2  | 2  | [11,15]  |
| chr17:14052505  | COX10   | UTR3        |                                                                                      | + | TtoC | 0.1429 | 0.1538 | 4  | 2  | [13,14]  |
| chr17:13913627  | COX10   | UTR5        |                                                                                      | + | GtoT | 0.1    | 0.1176 | 3  | 2  | [10,17]  |
| chr3:120871119  | COX17   | UTR3        |                                                                                      | - | AtoG | 0.1176 | 0.2353 | 7  | 2  | [17,34]  |
| chr4:74149380   | COX18   | mixed       |                                                                                      | - | CtoG | 0.1    | 0.1    | 3  | 2  | [10,10]  |
| chr16:84398099  | COX41   | UTR3        |                                                                                      | + | TtoA | 0.125  | 0.1852 | 15 | 3  | [27,65]  |
| chr16:84398105  | COX41   | UTR3        |                                                                                      | + | TtoC | 0.1333 | 0.3333 | 8  | 2  | [10,15]  |
| chr16:84398109  | COX41   | UTR3        |                                                                                      | + | AtoG | 0.1    | 0.1111 | 4  | 2  | [10,11]  |
| chr16:84370175  | COX4NB  | UTR3        |                                                                                      | - | AtoG | 0.1    | 0.1333 | 2  | 2  | [10,15]  |
| chr16:84370576  | COX4NB  | UTR3        |                                                                                      | - | TtoA | 0.1053 | 0.1053 | 6  | 2  | [19,19]  |
| chr16:84370627  | COX4NB  | UTR3        |                                                                                      | - | TtoC | 0.1    | 0.1    | 5  | 2  | [20,30]  |
| chr2:97631083   | COX5B   | UTR3        |                                                                                      | + | TtoC | 0.1209 | 0.2381 | 3  | 3  | [15,91]  |
| chr12:119360595 | COX6A1  | coding_exon | ENST00000229379:VtoA;                                                                | + | TtoC | 0.1    | 0.2174 | 5  | 4  | [20,26]  |
| chr12:119360585 | COX6A1  | coding_exon | ENST00000229379:TtoA;                                                                | + | AtoG | 0.129  | 0.1316 | 6  | 2  | [33,38]  |
| chr12:119360380 | COX6A1  | coding_exon | ENST00000229379:PtoH;                                                                | + | CtoA | 0.1154 | 0.25   | 3  | 2  | [12,26]  |
| chr12:119360382 | COX6A1  | coding_exon | ENST00000229379:MtoL;                                                                | + | AtoC | 0.12   | 0.2727 | 4  | 4  | [11,26]  |
| chr12:119360381 | COX6A1  | coding_exon |                                                                                      | + | TtoG | 0.1    | 0.2727 | 3  | 2  | [10,11]  |
| chr12:119362762 | COX6A1  | UTR3        |                                                                                      | + | GtoT | 0.1429 | 0.3333 | 6  | 4  | [11,21]  |
| chr12:119362764 | COX6A1  | UTR3        |                                                                                      | + | AtoT | 0.2    | 0.3333 | 5  | 3  | [10,22]  |
| chr12:119362776 | COX6A1  | UTR3        |                                                                                      | + | CtoA | 0.1026 | 0.2941 | 11 | 4  | [16,40]  |
| chr12:119362778 | COX6A1  | UTR3        |                                                                                      | + | TtoA | 0.1071 | 0.3    | 10 | 4  | [15,43]  |
| chr12:119362798 | COX6A1  | UTR3        |                                                                                      | + | AtoG | 0.1    | 0.1    | 4  | 2  | [10,10]  |
| chr19:40841500  | COX6B1  | UTR3        |                                                                                      | + | TtoA | 0.1143 | 0.1463 | 9  | 3  | [38,46]  |
| chr6:76020289   | COX7A2  | coding_exon |                                                                                      | - | AtoG | 0.1    | 0.1818 | 3  | 2  | [10,11]  |
| chr6:76010179   | COX7A2  | mixed       |                                                                                      | - | AtoC | 0.1125 | 0.124  | 2  | 2  | [81,123] |
| chr6:76004222   | COX7A2  | UTR3        |                                                                                      | - | CtoA | 0.75   | 1      | 8  | 8  | [11,15]  |
| chr2:42431227   | COX7A2L | UTR3        |                                                                                      | - | AtoG | 0.1071 | 0.1364 | 4  | 2  | [56,92]  |
| chr2:42431305   | COX7A2L | UTR3        |                                                                                      | - | TtoG | 0.1053 | 0.3231 | 5  | 3  | [38,65]  |
| chr2:42431317   | COX7A2L | UTR3        |                                                                                      | - | AtoG | 0.1216 | 0.3091 | 6  | 3  | [55,88]  |
| chr5:85952340   | COX7C   | UTR3        |                                                                                      | + | TtoA | 0.12   | 0.3    | 9  | 6  | [10,25]  |
| chr11:63500572  | COX8A   | UTR3        |                                                                                      | + | TtoA | 0.2    | 0.5    | 3  | 2  | [10,20]  |
| chr3:150367592  | CP      | mixed       |                                                                                      | - | GtoT | 0.1    | 0.1    | 2  | 2  | [10,10]  |
| chr5:173312821  | CPEB4   | coding_exon | ENST00000265085:StoR;ENST00000326629:StoR;ENST00000334035:StoR;                      | + | TtoA | 0.1    | 0.1111 | 2  | 2  | [10,18]  |
| chr5:173317457  | CPEB4   | UTR3        |                                                                                      | + | TtoG | 0.1    | 0.1    | 3  | 2  | [10,10]  |
| chr5:173319667  | CPEB4   | UTR3        |                                                                                      | + | AtoG | 0.1    | 0.1538 | 2  | 2  | [10,13]  |
| chr20:33678725  | CPNE1   | coding_exon | ENST00000317619:YtoS;ENST00000317677:YtoS;ENST00000349942:YtoS;ENST00000349942:YtoS; | - | AtoC | 0.1111 | 0.5    | 11 | 9  | [10,73]  |
| chr20:33678726  | CPNE1   | coding_exon | ENST00000317619:YtoH;ENST00000317677:YtoH;ENST00000349942:YtoH;ENST00000349942:YtoH; | - | TtoC | 0.129  | 0.3077 | 7  | 2  | [13,31]  |
| chr20:33703835  | CPNE1   | mixed       |                                                                                      | - | TtoC | 0.1    | 0.1579 | 6  | 2  | [10,19]  |
| chr20:33704256  | CPNE1   | mixed       |                                                                                      | - | TtoC | 0.1176 | 0.1515 | 4  | 2  | [17,33]  |
| chr8:87640012   | CPNE3   | UTR3        |                                                                                      | + | TtoC | 0.1    | 0.125  | 6  | 3  | [10,32]  |
| chr6:36822291   | CPNE5   | coding_exon | ENST00000244751:YtoD;                                                                | - | TtoG | 0.1    | 0.2    | 4  | 2  | [11,20]  |
| chr16:88190635  | CPNE7   | UTR3        |                                                                                      | + | TtoC | 0.1    | 0.1    | 4  | 2  | [10,10]  |
| chr12:37373851  | CPNE8   | coding_exon | ENST00000331366:YtoN;                                                                | - | TtoA | 0.1    | 0.1    | 3  | 2  | [10,10]  |
| chr3:99782005   | CPOX    | UTR3        |                                                                                      | - | AtoG | 0.1    | 0.125  | 3  | 2  | [24,40]  |
| chr14:91698605  | CP5F2   | UTR3        |                                                                                      | + | TtoC | 0.1    | 0.1333 | 2  | 2  | [10,15]  |
| chr2:9517115    | CP5F3   | coding_exon | ENST00000238112:LtoP;ENST00000460593:LtoP;                                           | + | TtoC | 0.1053 | 0.1579 | 5  | 2  | [19,19]  |
| chr12:67931190  | CP5F6   | coding_exon |                                                                                      | + | TtoC | 0.1    | 0.2143 | 9  | 4  | [14,43]  |
| chr22:49362620  | CPT1B   | coding_exon | ENST00000312108:GtoW;ENST00000360719:GtoW;ENST00000395650:GtoW;ENST00000395650:GtoW; | - | GtoT | 0.1    | 0.1429 | 2  | 2  | [10,14]  |
| chr22:49362152  | CPT1B   | coding_exon |                                                                                      | - | TtoG | 0.1053 | 0.125  | 4  | 2  | [16,19]  |
| chr3:3166873    | CRBN    | UTR3        |                                                                                      | - | TtoC | 0.2    | 0.2    | 2  | 2  | [10,10]  |
| chr3:3167353    | CRBN    | UTR3        |                                                                                      | - | AtoC | 0.1    | 0.1111 | 2  | 2  | [10,18]  |
| chr7:65255981   | CRCP    | UTR3        |                                                                                      | + | AtoG | 0.1111 | 0.1818 | 5  | 4  | [11,20]  |
| chr2:208169949  | CREB1   | coding_exon |                                                                                      | + | AtoG | 0.1053 | 0.1333 | 6  | 2  | [16,19]  |
| chr9:35726851   | CREB3   | UTR3        |                                                                                      | + | CtoG | 0.1429 | 0.4615 | 3  | 3  | [10,14]  |
| chr9:35726862   | CREB3   | UTR3        |                                                                                      | + | AtoT | 0.2222 | 0.25   | 3  | 3  | [10,13]  |
| chr7:137239254  | CREB3L2 | coding_exon | ENST00000330387:LtoP;ENST00000456390:LtoP;                                           | - | TtoC | 0.1    | 0.1429 | 4  | 2  | [10,14]  |
| chr7:137210992  | CREB3L2 | UTR3        |                                                                                      | - | TtoG | 0.2308 | 0.3    | 4  | 2  | [10,13]  |
| chr7:137210998  | CREB3L2 | UTR3        |                                                                                      | - | GtoT | 0.1111 | 0.5    | 6  | 4  | [12,28]  |
| chr7:137211656  | CREB3L2 | UTR3        |                                                                                      | - | GtoC | 0.1    | 0.25   | 3  | 2  | [10,12]  |
| chr7:137212592  | CREB3L2 | UTR3        |                                                                                      | - | AtoG | 0.1    | 0.1429 | 7  | 3  | [10,21]  |
| chr7:137214485  | CREB3L2 | UTR3        |                                                                                      | - | AtoG | 0.1    | 0.2143 | 2  | 2  | [11,15]  |
| chr7:137214507  | CREB3L2 | UTR3        |                                                                                      | - | AtoG | 0.1    | 0.1818 | 3  | 2  | [10,11]  |
| chr1:152212297  | CREB3L4 | coding_exon | ENST00000271889:VtoA;ENST00000368600:VtoA;ENST00000368603:VtoA;ENST00000368603:VtoA; | + | TtoC | 0.1    | 0.1    | 3  | 3  | [10,10]  |
| chr1:152213139  | CREB3L4 | coding_exon | ENST00000271889:StoP;ENST00000368600:StoP;ENST00000368603:StoP;ENST00000368603:StoP; | + | TtoC | 0.1    | 0.1333 | 3  | 2  | [10,15]  |
| chr1:152212357  | CREB3L4 | coding_exon | ENST00000271889:HtoR;ENST00000368600:HtoR;ENST00000368603:HtoR;ENST00000368603:HtoR; | + | AtoG | 0.1    | 0.1818 | 4  | 2  | [10,11]  |
| chr1:152213439  | CREB3L4 | UTR3        |                                                                                      | + | AtoG | 0.1    | 0.1    | 2  | 2  | [10,10]  |
| chr16:3741735   | CREBBP  | mixed       |                                                                                      | - | CtoA | 0.1    | 0.1053 | 2  | 2  | [10,19]  |
| chr16:3768817   | CREBBP  | mixed       |                                                                                      | - | TtoC | 0.1    | 0.1    | 4  | 2  | [10,10]  |
| chr16:3840433   | CREBBP  | mixed       |                                                                                      | - | GtoA | 0.1    | 0.1    | 3  | 2  | [10,10]  |
| chr16:3840484   | CREBBP  | mixed       |                                                                                      | - | CtoA | 0.1    | 0.1    | 2  | 2  | [10,10]  |
| chr6:32191126   | CREBL1  | UTR3        |                                                                                      | - | CtoA | 0.1333 | 0.2667 | 7  | 2  | [30,30]  |
| chr6:32191175   | CREBL1  | UTR3        |                                                                                      | - | TtoG | 0.1186 | 0.1923 | 8  | 3  | [26,59]  |





|                 |          |             |                                                                                      |   |      |        |        |    |    |          |
|-----------------|----------|-------------|--------------------------------------------------------------------------------------|---|------|--------|--------|----|----|----------|
| chr6:43122631   | CUL7     | coding_exon | ENST00000265348:KtoE;                                                                | - | AtaG | 0.125  | 0.1667 | 2  | 2  | [12,16]  |
| chr6:43123940   | CUL7     | coding_exon | ENST00000265348:EtoG;                                                                | - | AtaG | 0.1    | 0.1    | 2  | 2  | [10,20]  |
| chr6:43296595   | CUL9     | coding_exon | ENST00000252050:WtoR;ENST00000354495:WtoR;ENST00000372647:WtoR;                      | + | TtoC | 0.1    | 0.1333 | 4  | 3  | [10,19]  |
| chr6:43260529   | CUL9     | coding_exon | ENST00000252050:LtoQ;ENST00000354351:LtoQ;ENST00000354495:LtoQ;ENST00000372647:LtoQ; | + | TtoA | 0.1    | 0.1    | 2  | 2  | [10,10]  |
| chr6:43300100   | CUL9     | coding_exon | ENST00000252050:LtoP;ENST00000354495:LtoP;ENST00000372647:LtoP;                      | + | TtoC | 0.1    | 0.1667 | 6  | 2  | [10,30]  |
| chr6:43288948   | CUL9     | coding_exon | ENST00000252050:KtoE;ENST00000354495:KtoE;ENST00000372647:KtoE;                      | + | AtaG | 0.1    | 0.1    | 3  | 2  | [10,10]  |
| chr6:33493507   | CUTA     | mixed       |                                                                                      | - | GtoC | 0.1071 | 0.1786 | 2  | 2  | [28,29]  |
| chr6:33492314   | CUTA     | UTR3        |                                                                                      | - | TtoC | 0.15   | 0.1818 | 7  | 3  | [11,20]  |
| chr10:101504328 | CUTC     | coding_exon |                                                                                      | + | TtoA | 0.1034 | 0.3    | 5  | 2  | [10,29]  |
| chr10:101504379 | CUTC     | coding_exon |                                                                                      | + | TtoC | 0.1    | 0.1111 | 6  | 2  | [10,18]  |
| chr10:101504380 | CUTC     | coding_exon |                                                                                      | + | CtoA | 0.1    | 0.1176 | 5  | 2  | [10,17]  |
| chr10:101505634 | CUTC     | UTR3        |                                                                                      | + | AtaG | 0.1333 | 0.15   | 4  | 2  | [15,20]  |
| chr7:101527397  | CUX1     | coding_exon | ENST00000292535:LtoP;ENST00000292538:LtoP;ENST00000338990:LtoP;ENST00000372647:LtoP; | + | TtoC | 0.1    | 0.1    | 2  | 2  | [10,10]  |
| chr11:94339159  | CWC15    | coding_exon | ENST00000279839:LtoI;                                                                | - | CtoA | 0.2    | 0.4    | 2  | 2  | [10,10]  |
| chr11:94339158  | CWC15    | coding_exon | ENST00000279839:LtoH;                                                                | - | TtoA | 0.4545 | 0.6364 | 2  | 2  | [11,11]  |
| chr11:118271569 | CXCR5    | UTR3        |                                                                                      | + | AtaG | 0.1333 | 0.1667 | 2  | 2  | [12,15]  |
| chr5:139040879  | CXC5     | coding_exon | ENST00000302517:VtoG;                                                                | + | TtoG | 0.1429 | 0.15   | 2  | 2  | [20,21]  |
| chr5:139040571  | CXC5     | coding_exon |                                                                                      | + | TtoG | 0.1282 | 0.2097 | 2  | 2  | [39,62]  |
| chr5:139040886  | CXC5     | coding_exon |                                                                                      | + | TtoG | 0.1154 | 0.125  | 4  | 2  | [40,52]  |
| chr5:139043348  | CXC5     | UTR3        |                                                                                      | + | GtoA | 0.1364 | 0.1579 | 8  | 3  | [19,22]  |
| chr5:139008341  | CXC5     | UTR5        |                                                                                      | + | GtoA | 0.1    | 0.1    | 2  | 2  | [10,20]  |
| chr3:50363951   | CYB561D2 | coding_exon | ENST00000232508:LtoP;ENST00000418577:LtoP;ENST00000424512:LtoP;ENST00000435939:LtoP; | + | TtoC | 0.1    | 0.1765 | 7  | 2  | [10,17]  |
| chr3:50367296   | CYB561D2 | mixed       |                                                                                      | + | TtoC | 0.1    | 0.1    | 3  | 2  | [10,10]  |
| chr6:84660030   | CYB5R4   | coding_exon |                                                                                      | + | AtaG | 0.1667 | 0.2    | 3  | 2  | [10,12]  |
| chr2:172121682  | CYBRD1   | UTR3        |                                                                                      | + | CtoG | 0.1    | 0.1    | 2  | 2  | [10,10]  |
| chr15:20515200  | CYFIP1   | coding_exon | ENST00000313077:LtoP;ENST00000412127:LtoP;ENST00000435939:LtoP;                      | + | TtoC | 0.1111 | 0.125  | 4  | 2  | [16,18]  |
| chr15:20551650  | CYFIP1   | coding_exon | ENST00000313077:KtoR;ENST00000412127:KtoR;ENST00000435939:KtoR;                      | + | AtaG | 0.125  | 0.1429 | 4  | 2  | [14,16]  |
| chr15:20487364  | CYFIP1   | coding_exon | ENST00000313077:KtoE;ENST00000412127:KtoE;                                           | + | AtaG | 0.1    | 0.1    | 5  | 2  | [10,10]  |
| chr15:20554531  | CYFIP1   | UTR3        |                                                                                      | + | AtaG | 0.1    | 0.1176 | 2  | 2  | [17,20]  |
| chr15:20554558  | CYFIP1   | UTR3        |                                                                                      | + | TtoA | 0.1    | 0.1111 | 7  | 3  | [10,18]  |
| chr15:20555000  | CYFIP1   | UTR3        |                                                                                      | + | TtoC | 0.1    | 0.1923 | 3  | 2  | [10,26]  |
| chr5:156718606  | CYFIP2   | coding_exon | ENST00000318218:YtoD;ENST00000347377:YtoD;ENST00000377576:YtoD;ENST00000435939:YtoD; | + | TtoG | 0.1    | 0.1667 | 2  | 2  | [10,12]  |
| chr5:156753835  | CYFIP2   | UTR3        |                                                                                      | + | TtoA | 0.1    | 0.1    | 2  | 2  | [10,10]  |
| chr5:156754451  | CYFIP2   | UTR3        |                                                                                      | + | AtaG | 0.1    | 0.1111 | 3  | 2  | [10,18]  |
| chr16:49388090  | CYLD     | UTR3        |                                                                                      | + | AtaG | 0.1    | 0.1    | 3  | 2  | [10,10]  |
| chr16:49388116  | CYLD     | UTR3        |                                                                                      | + | TtoC | 0.1    | 0.1    | 2  | 2  | [10,10]  |
| chr16:49390840  | CYLD     | UTR3        |                                                                                      | + | AtaG | 0.1    | 0.1    | 2  | 2  | [10,10]  |
| chr16:49392572  | CYLD     | UTR3        |                                                                                      | + | AtaG | 0.1    | 0.1    | 5  | 2  | [10,10]  |
| chr16:49392578  | CYLD     | UTR3        |                                                                                      | + | TtoG | 0.1    | 0.1818 | 5  | 2  | [10,11]  |
| chr2:38149965   | CYP1B1   | UTR3        |                                                                                      | - | TtoA | 0.1    | 0.1    | 2  | 2  | [10,10]  |
| chr17:74183307  | CYTH1    | UTR3        |                                                                                      | - | AtaG | 0.1176 | 0.1364 | 5  | 2  | [17,22]  |
| chr19:53673135  | CYTH2    | coding_exon | ENST00000427476:AtaG;                                                                | + | CtoG | 1      | 1      | 10 | 10 | [10,21]  |
| chr7:6168836    | CYTH3    | UTR3        |                                                                                      | - | TtoG | 0.125  | 0.2222 | 2  | 2  | [10,16]  |
| chr7:6169380    | CYTH3    | UTR3        |                                                                                      | - | CtoT | 0.1    | 0.1    | 2  | 2  | [10,10]  |
| chr2:157979781  | CYTIP    | UTR3        |                                                                                      | - | TtoA | 0.1    | 0.3571 | 7  | 4  | [10,22]  |
| chr2:157980074  | CYTIP    | UTR3        |                                                                                      | - | AtaG | 0.1    | 0.1429 | 3  | 3  | [10,16]  |
| chr22:23091500  | CYTSA    | coding_exon | ENST00000314328:StoP;ENST00000437398:StoP;                                           | + | TtoG | 0.1429 | 0.1429 | 4  | 2  | [14,14]  |
| chr22:23048563  | CYTSA    | coding_exon | ENST00000314328:EtoK;ENST00000437398:EtoK;                                           | + | GtoA | 0.1    | 0.1    | 2  | 2  | [10,10]  |
| chr22:23141615  | CYTSA    | UTR3        |                                                                                      | + | AtaG | 0.1    | 0.1    | 2  | 2  | [10,10]  |
| chr2:242331725  | D2HGDH   | coding_exon | ENST00000321264:QtoL;ENST00000342518:QtoL;ENST00000403782:QtoL;                      | + | AtaT | 0.1053 | 0.1818 | 3  | 2  | [11,19]  |
| chr1:58744323   | DAB1     | mixed       |                                                                                      | - | TtoC | 0.1    | 0.1333 | 7  | 3  | [10,18]  |
| chr1:58777085   | DAB1     | mixed       |                                                                                      | - | TtoC | 0.1    | 0.1111 | 4  | 2  | [10,18]  |
| chr3:49544799   | DAG1     | coding_exon |                                                                                      | + | AtaG | 0.1    | 0.1    | 3  | 2  | [10,10]  |
| chr11:60865904  | DAK      | coding_exon | ENST00000311463:VtoA;ENST00000394900:VtoA;                                           | + | TtoC | 0.1    | 0.1034 | 2  | 2  | [10,29]  |
| chr5:10732983   | DAP      | UTR3        |                                                                                      | - | AtaC | 0.1047 | 0.2    | 6  | 2  | [41,86]  |
| chr5:10733501   | DAP      | UTR3        |                                                                                      | - | AtaC | 0.4202 | 0.5366 | 2  | 2  | [41,257] |
| chr9:89486358   | DAPK1    | coding_exon | ENST00000358077:TtoA;ENST00000408954:TtoA;ENST00000469640:TtoA;ENST00000469640:TtoA; | + | AtaG | 0.1    | 0.1176 | 2  | 2  | [10,17]  |
| chr9:89510940   | DAPK1    | coding_exon | ENST00000358077:LtoP;ENST00000408954:LtoP;ENST00000469640:LtoP;ENST00000469640:LtoP; | + | TtoC | 0.1053 | 0.1071 | 4  | 2  | [19,28]  |
| chr4:101004023  | DAPP1    | coding_exon | ENST00000296414:VtoA;                                                                | + | TtoC | 0.1    | 0.2308 | 3  | 2  | [10,14]  |
| chr2:136435478  | DARS     | coding_exon | ENST00000264161:VtoG;                                                                | - | TtoG | 0.1111 | 0.1429 | 6  | 2  | [57,64]  |
| chr1:172093635  | DARS2    | UTR3        |                                                                                      | + | AtaG | 0.1429 | 0.1875 | 3  | 2  | [14,16]  |
| chr19:1383538   | DAZAP1   | coding_exon |                                                                                      | + | AtaC | 0.1053 | 0.1364 | 2  | 2  | [44,57]  |
| chr19:1383577   | DAZAP1   | coding_exon |                                                                                      | + | AtaC | 0.1081 | 0.1159 | 5  | 2  | [70,74]  |
| chr19:1386059   | DAZAP1   | UTR3        |                                                                                      | + | TtoG | 0.1111 | 0.1429 | 2  | 2  | [14,27]  |
| chr19:1386158   | DAZAP1   | UTR3        |                                                                                      | + | TtoC | 0.1176 | 0.1842 | 6  | 4  | [17,38]  |
| chr17:40180352  | DBF4B    | coding_exon | ENST00000315005:ItaN;ENST00000393547:ItaN;                                           | + | TtoA | 0.1    | 0.1    | 2  | 2  | [10,10]  |
| chr17:40167045  | DBF4B    | coding_exon |                                                                                      | + | AtaG | 0.1    | 0.1    | 2  | 2  | [10,10]  |
| chr2:119846535  | DBI      | UTR3        |                                                                                      | + | TtoA | 0.1    | 0.1333 | 14 | 9  | [18,51]  |
| chr16:88599266  | DBNDD1   | UTR3        |                                                                                      | - | TtoC | 0.1    | 0.1143 | 2  | 2  | [10,37]  |
| chr16:88599763  | DBNDD1   | UTR3        |                                                                                      | - | TtoG | 0.1053 | 0.1176 | 4  | 2  | [17,19]  |
| chr7:44065567   | DBNL     | coding_exon | ENST00000258780:RtoG;ENST00000389369:RtoG;ENST00000414258:RtoG;ENST00000414258:RtoG; | + | AtaG | 0.1875 | 0.25   | 4  | 3  | [10,16]  |
| chr8:104524359  | DCAF13   | UTR3        |                                                                                      | + | TtoC | 0.1    | 0.1    | 2  | 2  | [10,10]  |
| chr14:72492104  | DCAF4    | coding_exon | ENST00000340355:VtoL;ENST00000353777:VtoL;ENST00000358377:VtoL;ENST00000358377:VtoL; | + | GtoC | 0.1    | 0.1429 | 2  | 2  | [10,14]  |
| chr14:72495737  | DCAF4    | UTR3        |                                                                                      | + | TtoC | 0.1    | 0.1818 | 2  | 2  | [10,11]  |
| chr14:68652888  | DCAF5    | coding_exon | ENST00000341516:TtoA;ENST00000389997:TtoA;                                           | - | AtaG | 0.1    | 0.1    | 4  | 2  | [10,10]  |
| chr14:68588512  | DCAF5    | UTR3        |                                                                                      | - | TtoC | 0.1    | 0.1    | 2  | 2  | [10,10]  |
| chr14:68588837  | DCAF5    | UTR3        |                                                                                      | - | CtoG | 0.1    | 0.1667 | 5  | 2  | [10,12]  |
| chr14:68588993  | DCAF5    | UTR3        |                                                                                      | - | AtaT | 0.1    | 0.1    | 2  | 2  | [10,10]  |
| chr14:68589250  | DCAF5    | UTR3        |                                                                                      | - | TtoG | 0.1    | 0.1538 | 8  | 5  | [10,20]  |
| chr4:72110440   | DKC      | coding_exon | ENST00000286648:QtoR;                                                                | + | AtaG | 0.1667 | 0.2    | 2  | 2  | [10,12]  |
| chr1:114256077  | DCLRE1B  | coding_exon | ENST00000369563:TtoN;                                                                | + | CtoA | 0.1    | 0.1667 | 2  | 2  | [10,12]  |
| chr10:14989196  | DCLRE1C  | mixed       |                                                                                      | - | GtoA | 0.1333 | 0.1333 | 2  | 2  | [15,16]  |
| chr10:14989248  | DCLRE1C  | mixed       |                                                                                      | - | AtaT | 0.1    | 0.2    | 2  | 2  | [10,10]  |
| chr3:53321417   | DCP1A    | coding_exon | ENST00000294241:QtoR;ENST00000398650:QtoR;ENST00000480258:QtoR;                      | - | AtaG | 0.1    | 0.1176 | 3  | 2  | [10,17]  |
| chr3:53297343   | DCP1A    | coding_exon | ENST00000294241:QtoP;                                                                | - | AtaC | 1      | 1      | 11 | 11 | [10,17]  |
| chr3:53294009   | DCP1A    | UTR3        |                                                                                      | - | GtoT | 0.1071 | 0.1818 | 6  | 3  | [11,28]  |
| chr3:53294887   | DCP1A    | UTR3        |                                                                                      | - | TtoA | 0.1111 | 0.1667 | 4  | 2  | [12,18]  |
| chr3:53296130   | DCP1A    | UTR3        |                                                                                      | - | GtoA | 0.1    | 0.1111 | 3  | 2  | [10,18]  |
| chr12:1925589   | DCP1B    | UTR3        |                                                                                      | - | TtoC | 0.1538 | 0.1538 | 4  | 2  | [13,13]  |
| chr11:125720822 | DCP5     | UTR3        |                                                                                      | + | TtoG | 0.1071 | 0.1667 | 5  | 3  | [18,28]  |
| chr4:184073651  | DCTD     | coding_exon | ENST00000312820:VtoG;ENST00000357067:VtoG;ENST00000438320:VtoG;ENST00000438320:VtoG; | - | TtoG | 0.1176 | 0.1667 | 4  | 3  | [17,43]  |
| chr5:150069649  | DCTN4    | UTR3        |                                                                                      | - | CtoT | 0.1    | 0.1    | 3  | 2  | [10,10]  |
| chr5:150070168  | DCTN4    | UTR3        |                                                                                      | - | TtoC | 0.1    | 0.1    | 3  | 2  | [10,10]  |
| chr5:150070297  | DCTN4    | UTR3        |                                                                                      | - | TtoG | 0.1    | 0.1    | 2  | 2  | [10,10]  |
| chr5:150070604  | DCTN4    | UTR3        |                                                                                      | - | AtaG | 0.125  | 0.1667 | 6  | 3  | [12,16]  |
| chr3:184161770  | DCUN1D1  | coding_exon | ENST00000292782:RtoQ;ENST00000458486:RtoQ;ENST00000469954:RtoQ;                      | - | GtoA | 0.1    | 0.1    | 2  | 2  | [10,10]  |

|                 |         |             |                                                                                      |   |      |        |        |    |    |          |
|-----------------|---------|-------------|--------------------------------------------------------------------------------------|---|------|--------|--------|----|----|----------|
| chr11:102438212 | DCUN1D5 | UTR3        |                                                                                      | - | TtoC | 0.1111 | 0.1875 | 9  | 3  | [16,24]  |
| chr11:60837717  | DDB1    | coding_exon |                                                                                      | - | TtoC | 0.9722 | 1      | 13 | 13 | [11,178] |
| chr14:52583202  | DDHD1   | UTR3        |                                                                                      | - | AtoT | 0.1111 | 0.2    | 3  | 2  | [10,10]  |
| chr8:38226402   | DDHD2   | coding_exon | ENST00000319246:DtoG;ENST00000397166:DtoG;ENST00000440212:DtoG;                      | + | AtoG | 0.1    | 0.1    | 5  | 2  | [10,10]  |
| chr1:15864452   | DDI2    | UTR3        |                                                                                      | + | TtoC | 0.1    | 0.1    | 3  | 2  | [10,10]  |
| chr12:56196673  | DDIT3   | UTR3        |                                                                                      | - | TtoC | 0.129  | 0.3    | 2  | 2  | [10,32]  |
| chr12:56197487  | DDIT3   | UTR5        |                                                                                      | - | TtoC | 0.1053 | 0.1667 | 3  | 2  | [13,19]  |
| chr12:56197488  | DDIT3   | UTR5        |                                                                                      | - | AtoG | 0.1    | 0.1    | 4  | 2  | [10,11]  |
| chr10:73704341  | DDIT4   | coding_exon |                                                                                      | + | AtoG | 0.1053 | 0.15   | 2  | 2  | [19,20]  |
| chr10:73705761  | DDIT4   | UTR3        |                                                                                      | + | AtoG | 0.1333 | 0.1818 | 4  | 4  | [12,22]  |
| chr1:20851300   | DDOST   | UTR3        |                                                                                      | - | TtoA | 0.1364 | 0.3704 | 11 | 9  | [19,47]  |
| chr20:3119165   | DDRK1   | UTR3        |                                                                                      | - | GtoA | 0.1    | 0.1667 | 2  | 2  | [10,12]  |
| chr22:22643955  | DDT     | coding_exon |                                                                                      | - | AtoG | 0.1    | 0.2    | 2  | 2  | [10,10]  |
| chr11:108069474 | DDX10   | coding_exon | ENST00000322536:VtoA;ENST00000456020:VtoA;                                           | + | TtoC | 0.1    | 0.1667 | 4  | 2  | [10,12]  |
| chr11:108082732 | DDX10   | coding_exon | ENST00000322536:VtoA;ENST00000456020:VtoA;                                           | + | TtoC | 0.1    | 0.1111 | 3  | 2  | [10,18]  |
| chr22:37212009  | DDX17   | coding_exon |                                                                                      | - | AtoC | 0.1023 | 0.1319 | 4  | 2  | [88,91]  |
| chr22:37211519  | DDX17   | UTR3        |                                                                                      | - | AtoG | 0.1053 | 0.3636 | 5  | 3  | [11,19]  |
| chr22:37211761  | DDX17   | UTR3        |                                                                                      | - | CtoT | 0.1    | 0.2    | 5  | 2  | [11,11]  |
| chr1:112110290  | DDX20   | coding_exon | ENST00000369702:QtoR;                                                                | + | AtoG | 0.1    | 0.1    | 2  | 2  | [10,20]  |
| chr1:112111140  | DDX20   | UTR3        |                                                                                      | + | AtoG | 0.1538 | 0.1579 | 4  | 2  | [13,19]  |
| chr10:70398756  | DDX21   | coding_exon | ENST00000354185:QtoR;                                                                | + | AtoG | 0.1538 | 0.1818 | 3  | 2  | [14,22]  |
| chr10:70413167  | DDX21   | UTR3        |                                                                                      | + | AtoA | 0.1111 | 0.1538 | 11 | 4  | [10,41]  |
| chr14:93587291  | DDX24   | coding_exon | ENST00000330836:*toS;ENST00000423579:*toS;ENST00000440370:*toS;                      | - | AtoC | 0.12   | 0.1429 | 3  | 2  | [14,25]  |
| chr14:93587067  | DDX24   | UTR3        |                                                                                      | - | TtoG | 0.1    | 0.2222 | 3  | 2  | [10,10]  |
| chr14:93587286  | DDX24   | UTR3        |                                                                                      | - | GtoC | 0.119  | 0.2667 | 4  | 3  | [16,42]  |
| chr20:47293868  | DDX27   | UTR3        |                                                                                      | + | GtoT | 0.1    | 0.1429 | 2  | 2  | [10,14]  |
| chr9:134497286  | DDX31   | coding_exon | ENST00000372153:RtoQ;ENST00000372155:RtoQ;ENST00000372159:RtoQ;                      | - | GtoA | 0.1    | 0.1    | 3  | 2  | [10,10]  |
| chr19:14382028  | DDX39   | coding_exon | ENST00000242792:DtoE;ENST00000324340:DtoE;ENST00000451994:DtoE;ENST00000373585:DtoY; | - | TtoG | 0.1167 | 0.1489 | 5  | 2  | [47,181] |
| chr5:176871196  | DDX41   | UTR3        |                                                                                      | - | AtoG | 0.1    | 0.1    | 3  | 2  | [10,10]  |
| chr5:176871197  | DDX41   | UTR3        |                                                                                      | - | AtoG | 0.1    | 0.1429 | 6  | 2  | [10,14]  |
| chr17:59250160  | DDX42   | UTR3        |                                                                                      | + | TtoC | 0.1013 | 0.1034 | 10 | 2  | [30,80]  |
| chr17:59250192  | DDX42   | UTR3        |                                                                                      | + | AtoG | 0.1333 | 0.1765 | 9  | 2  | [15,17]  |
| chr5:134190554  | DDX46   | coding_exon | ENST00000354283:VtoG;ENST00000452510:VtoG;                                           | + | TtoG | 0.1034 | 0.1333 | 5  | 2  | [15,29]  |
| chr5:134134519  | DDX46   | coding_exon |                                                                                      | + | TtoC | 0.125  | 0.1429 | 3  | 2  | [21,24]  |
| chr5:134181243  | DDX46   | coding_exon |                                                                                      | + | TtoC | 0.1053 | 0.1364 | 3  | 3  | [17,22]  |
| chr5:134182514  | DDX46   | coding_exon |                                                                                      | + | AtoG | 0.12   | 0.1429 | 4  | 3  | [14,33]  |
| chr17:59926507  | DDX5    | coding_exon | ENST00000225792:QtoR;ENST00000450599:QtoR;                                           | - | AtoG | 0.1064 | 0.12   | 10 | 2  | [50,94]  |
| chr17:59929579  | DDX5    | coding_exon | ENST00000225792:QtoR;ENST00000450599:QtoR;                                           | - | GtoT | 0.1    | 0.1134 | 4  | 2  | [98,150] |
| chr17:59926505  | DDX5    | coding_exon | ENST00000225792:*toK;ENST00000450599:*toK;                                           | - | TtoA | 0.1067 | 0.1591 | 10 | 3  | [33,75]  |
| chr17:59929577  | DDX5    | coding_exon |                                                                                      | - | AtoT | 0.112  | 0.1319 | 7  | 2  | [92,127] |
| chr10:70336506  | DDX50   | coding_exon | ENST00000373585:StoP;                                                                | + | TtoC | 0.1    | 0.1538 | 3  | 2  | [10,13]  |
| chr10:70340914  | DDX50   | coding_exon | ENST00000373585:RtoQ;                                                                | + | GtoA | 0.1111 | 0.1667 | 3  | 2  | [18,18]  |
| chr10:70331171  | DDX50   | coding_exon | ENST00000373585:DtoY;                                                                | + | GtoT | 0.16   | 0.1667 | 3  | 2  | [18,25]  |
| chr10:70331182  | DDX50   | coding_exon |                                                                                      | + | GtoA | 0.1379 | 0.1579 | 3  | 2  | [19,30]  |
| chr10:70340918  | DDX50   | coding_exon |                                                                                      | + | AtoG | 0.1    | 0.1176 | 3  | 2  | [10,17]  |
| chr10:70364116  | DDX50   | coding_exon |                                                                                      | + | TtoC | 0.1    | 0.1    | 2  | 2  | [10,10]  |
| chr10:70376513  | DDX50   | UTR3        |                                                                                      | + | TtoC | 0.1304 | 0.16   | 3  | 2  | [25,46]  |
| chr12:122663701 | DDX55   | coding_exon | ENST00000238146:LtoP;ENST00000354291:LtoP;                                           | + | TtoC | 0.1    | 0.1    | 5  | 2  | [10,10]  |
| chr12:122671258 | DDX55   | UTR3        |                                                                                      | + | TtoC | 0.1111 | 0.1667 | 3  | 2  | [12,18]  |
| chr1:198902180  | DDX59   | mixed       |                                                                                      | - | GtoA | 0.1    | 0.1333 | 4  | 2  | [10,15]  |
| chr11:118123994 | DDX6    | UTR3        |                                                                                      | - | AtoG | 0.1    | 0.1    | 7  | 2  | [21,30]  |
| chr11:118124562 | DDX6    | UTR3        |                                                                                      | - | AtoG | 0.1042 | 0.1587 | 9  | 4  | [28,63]  |
| chr11:118125939 | DDX6    | UTR3        |                                                                                      | - | TtoA | 0.1    | 0.1    | 3  | 2  | [10,10]  |
| chr8:91133336   | DECR1   | UTR3        |                                                                                      | + | GtoA | 0.1053 | 0.1163 | 5  | 2  | [19,44]  |
| chr1:159358125  | DEDD    | UTR3        |                                                                                      | - | CtoG | 0.1    | 0.1053 | 3  | 2  | [10,19]  |
| chr6:18332446   | DEK     | UTR3        |                                                                                      | - | TtoG | 0.1176 | 0.2    | 6  | 2  | [10,17]  |
| chr9:125203939  | DENND1A | coding_exon | ENST00000373620:TtoA;                                                                | - | AtoG | 0.1    | 0.1429 | 2  | 2  | [10,14]  |
| chr9:125454195  | DENND1A | coding_exon | ENST00000373618:VtoG;ENST00000373620:VtoG;ENST00000373624:VtoG;                      | - | TtoG | 0.1111 | 0.2308 | 3  | 3  | [10,18]  |
| chr9:125454192  | DENND1A | coding_exon | ENST00000373618:DtoG;ENST00000373620:DtoG;ENST00000373624:DtoG;                      | - | AtoG | 0.1    | 0.1    | 4  | 2  | [10,10]  |
| chr9:125182542  | DENND1A | UTR3        |                                                                                      | - | AtoG | 0.1    | 0.1053 | 3  | 2  | [10,19]  |
| chr19:6430011   | DENND1C | coding_exon | ENST00000381480:GtoD;                                                                | - | GtoA | 0.1304 | 0.1429 | 4  | 2  | [14,23]  |
| chr19:6432691   | DENND1C | coding_exon | ENST00000381480:EtoK;                                                                | - | GtoA | 0.1111 | 0.1333 | 3  | 2  | [15,18]  |
| chr19:6432690   | DENND1C | coding_exon | ENST00000381480:EtoG;                                                                | - | AtoG | 0.1    | 0.1538 | 4  | 2  | [13,20]  |
| chr15:63741252  | DENND4A | coding_exon |                                                                                      | - | TtoA | 0.1    | 0.1538 | 3  | 2  | [10,13]  |
| chr1:152174013  | DENND4B | coding_exon | ENST00000361217:WtoR;ENST00000368646:WtoR;                                           | - | TtoC | 0.1    | 0.1176 | 4  | 2  | [17,20]  |
| chr9:19363822   | DENND4C | UTR3        |                                                                                      | + | TtoA | 0.1    | 0.1429 | 3  | 2  | [11,14]  |
| chr12:16081164  | DERA    | UTR3        |                                                                                      | + | TtoC | 0.1    | 0.1111 | 3  | 2  | [10,20]  |
| chr8:124112070  | DERL1   | mixed       |                                                                                      | - | TtoC | 0.1333 | 0.1667 | 5  | 2  | [12,15]  |
| chr8:124094977  | DERL1   | UTR3        |                                                                                      | - | TtoC | 0.1    | 0.1579 | 5  | 2  | [10,19]  |
| chr8:124095756  | DERL1   | UTR3        |                                                                                      | - | TtoC | 0.1    | 0.1429 | 4  | 2  | [10,14]  |
| chr17:5324185   | DERL2   | coding_exon | ENST00000158771:ltoN;                                                                | - | TtoA | 0.1    | 0.1    | 2  | 2  | [10,10]  |
| chr17:5329200   | DERL2   | coding_exon | ENST00000158771:FtoI;                                                                | - | TtoA | 0.1    | 0.1    | 2  | 2  | [10,10]  |
| chr22:22506754  | DERL3   | UTR3        |                                                                                      | - | TtoC | 0.1333 | 0.1818 | 2  | 2  | [11,15]  |
| chr16:10930917  | DEXI    | mixed       |                                                                                      | - | AtoG | 0.1429 | 0.1579 | 6  | 2  | [14,19]  |
| chr16:10942927  | DEXI    | mixed       |                                                                                      | - | TtoG | 0.2    | 0.2143 | 5  | 2  | [10,14]  |
| chr7:24705225   | DFNA5   | coding_exon | ENST00000342947:LtoQ;ENST00000409775:LtoQ;ENST00000409970:LtoQ;ENST00000342947:WtoG; | - | TtoA | 0.1    | 0.1429 | 4  | 2  | [21,30]  |
| chr22:17456923  | DGCR2   | coding_exon | ENST00000263196:WtoG;ENST00000447928:WtoG;                                           | - | TtoG | 0.1    | 0.1    | 4  | 2  | [10,10]  |
| chr22:18457499  | DGCR8   | coding_exon | ENST00000351989:KtoE;ENST00000383024:KtoE;ENST00000407755:KtoE;                      | + | AtoG | 0.1111 | 0.1333 | 5  | 2  | [15,18]  |
| chr2:234021475  | DGKD    | coding_exon | ENST00000264057:Qto*;                                                                | + | CtoT | 0.1    | 0.2    | 5  | 2  | [15,20]  |
| chr2:234033674  | DGKD    | coding_exon |                                                                                      | + | GtoA | 0.4706 | 0.5    | 2  | 2  | [16,34]  |
| chr2:74031276   | DGUOK   | mixed       |                                                                                      | + | AtoG | 0.1053 | 0.1667 | 8  | 2  | [12,19]  |
| chr11:70823900  | DHCR7   | UTR3        |                                                                                      | - | TtoC | 0.1    | 0.1163 | 3  | 2  | [40,43]  |
| chr11:70837047  | DHCR7   | UTR5        |                                                                                      | - | GtoT | 0.5333 | 0.5455 | 2  | 2  | [11,15]  |
| chr1:26668136   | DHDDS   | coding_exon | ENST00000236342:VtoA;ENST00000357049:VtoA;ENST00000360009:VtoA;ENST00000236342:WtoG; | + | TtoC | 0.1    | 0.1538 | 4  | 2  | [10,14]  |
| chr1:26641831   | DHDDS   | mixed       |                                                                                      | + | TtoC | 0.125  | 0.2727 | 7  | 3  | [11,16]  |
| chr1:26669241   | DHDDS   | UTR3        |                                                                                      | + | TtoC | 0.1    | 0.1    | 2  | 2  | [10,10]  |
| chr16:70605883  | DHODH   | coding_exon | ENST00000219240:VtoA;ENST00000378782:VtoA;                                           | + | TtoC | 0.1    | 0.1    | 2  | 2  | [10,10]  |
| chr17:32030785  | DHRS11  | UTR3        |                                                                                      | + | GtoT | 0.1    | 0.1    | 2  | 2  | [10,10]  |
| chr10:12203928  | DHTKD1  | UTR3        |                                                                                      | + | TtoG | 0.1111 | 0.1111 | 3  | 2  | [18,27]  |
| chr4:24187092   | DHX15   | coding_exon | ENST00000336812:YtoN;                                                                | - | TtoA | 0.1    | 0.1667 | 8  | 2  | [20,24]  |
| chr4:24140391   | DHX15   | coding_exon | ENST00000336812:VtoA;                                                                | - | TtoC | 0.1064 | 0.1231 | 6  | 3  | [47,67]  |
| chr4:24138219   | DHX15   | UTR3        |                                                                                      | - | TtoA | 0.2222 | 0.2857 | 2  | 2  | [10,14]  |
| chr4:24138225   | DHX15   | UTR3        |                                                                                      | - | AtoG | 0.1    | 0.1071 | 5  | 2  | [10,28]  |
| chr6:30732393   | DHX16   | coding_exon |                                                                                      | - | GtoA | 0.1    | 0.1    | 2  | 2  | [10,10]  |
| chr5:54601150   | DHX29   | coding_exon | ENST00000251636:NtoD;                                                                | - | AtoG | 0.1    | 0.2    | 3  | 2  | [10,10]  |
| chr3:47866645   | DHX30   | UTR3        |                                                                                      | + | TtoC | 0.1    | 0.15   | 9  | 2  | [10,20]  |

|                 |          |             |                                                                                      |   |      |        |        |   |   |         |
|-----------------|----------|-------------|--------------------------------------------------------------------------------------|---|------|--------|--------|---|---|---------|
| chr17:5306382   | DHX33    | coding_exon | ENST00000225296:LtoP;ENST00000457531:LtoP;                                           | - | TtoC | 0.1111 | 0.2143 | 3 | 2 | [14,18] |
| chr17:5294967   | DHX33    | coding_exon | ENST00000225296:Atop;ENST00000433302:Atop;ENST00000457531:Atop;                      | - | GtoC | 0.1    | 0.1    | 2 | 2 | [10,11] |
| chr17:5285209   | DHX33    | UTR3        |                                                                                      | - | Atot | 0.1333 | 0.1818 | 3 | 2 | [11,15] |
| chr12:124010854 | DHX37    | coding_exon | ENST00000308736:VtoG;                                                                | - | TtoG | 0.1    | 0.1    | 2 | 2 | [10,10] |
| chr12:124036606 | DHX37    | coding_exon | ENST00000308736:KtoE;                                                                | - | Atog | 0.1    | 0.1    | 2 | 2 | [10,10] |
| chr12:123997344 | DHX37    | UTR3        |                                                                                      | - | TtoA | 0.1    | 0.1    | 2 | 2 | [10,10] |
| chr16:70687873  | DHX38    | coding_exon | ENST00000268482:KtoE;                                                                | + | Atog | 0.1    | 0.1034 | 4 | 2 | [10,29] |
| chr16:70704237  | DHX38    | UTR3        |                                                                                      | + | Atog | 0.1111 | 0.125  | 7 | 2 | [16,18] |
| chr2:38906616   | DHX57    | coding_exon | ENST00000295373:RtoQ;                                                                | - | GtoA | 0.1    | 0.1    | 2 | 2 | [10,10] |
| chr2:38896250   | DHX57    | coding_exon | ENST00000295373:FtoL;                                                                | - | TtoC | 0.1    | 0.1    | 3 | 2 | [10,10] |
| chr2:38899595   | DHX57    | coding_exon |                                                                                      | - | Atog | 0.1    | 0.1    | 2 | 2 | [10,10] |
| chr17:38956821  | DHX8     | UTR3        |                                                                                      | + | Atot | 0.1    | 0.1333 | 3 | 2 | [10,15] |
| chr17:38956866  | DHX8     | UTR3        |                                                                                      | + | TtoC | 0.1176 | 0.1429 | 4 | 2 | [14,17] |
| chr17:38957184  | DHX8     | UTR3        |                                                                                      | + | TtoC | 0.1    | 0.1429 | 3 | 2 | [10,14] |
| chr12:121258280 | DIABLO   | UTR3        |                                                                                      | - | GtoA | 0.1    | 0.3    | 4 | 3 | [10,12] |
| chr12:121258455 | DIABLO   | UTR3        |                                                                                      | - | Atog | 0.1154 | 0.1786 | 6 | 2 | [26,28] |
| chr13:59246325  | DIAPH3   | coding_exon | ENST00000267214:HtoQ;ENST00000267215:HtoQ;ENST00000377908:HtoQ;ENST00000377908:HtoQ; | - | TtoA | 0.1    | 0.1    | 3 | 2 | [10,10] |
| chr14:94632042  | DICER1   | coding_exon | ENST00000343455:DtoE;ENST00000393063:DtoE;                                           | - | TtoA | 0.1    | 0.1176 | 3 | 2 | [10,17] |
| chr14:94665696  | DICER1   | coding_exon |                                                                                      | - | TtoC | 0.1    | 0.1    | 2 | 2 | [10,10] |
| chr20:61016186  | DIDO1    | UTR5        |                                                                                      | - | Atoc | 0.1    | 0.1429 | 3 | 2 | [10,14] |
| chr5:61720613   | DIMT1L   | coding_exon | ENST00000199320:EtoG;                                                                | - | Atog | 0.1333 | 0.1579 | 6 | 2 | [15,19] |
| chr5:61720636   | DIMT1L   | coding_exon |                                                                                      | - | Atog | 0.1364 | 0.1538 | 5 | 2 | [13,22] |
| chr12:49394499  | DIP2B    | coding_exon | ENST00000301180:NtoD;                                                                | + | Atog | 0.1    | 0.1    | 2 | 2 | [10,10] |
| chr12:49425846  | DIP2B    | UTR3        |                                                                                      | + | Atoc | 0.1    | 0.1    | 2 | 2 | [10,10] |
| chr12:49427686  | DIP2B    | UTR3        |                                                                                      | + | CtoT | 0.1    | 0.1    | 2 | 2 | [10,10] |
| chr2:232736487  | DIS3L2   | coding_exon | ENST00000273009:VtoA;ENST00000325385:VtoA;ENST00000409307:VtoA;                      | + | TtoC | 0.2    | 0.2    | 3 | 2 | [10,10] |
| chr2:232811563  | DIS3L2   | coding_exon |                                                                                      | + | TtoC | 0.1    | 0.1    | 2 | 2 | [10,10] |
| chr11:111421163 | DLAT     | coding_exon | ENST00000280346:RtoQ;ENST00000393051:RtoQ;ENST00000452417:RtoQ;                      | + | GtoA | 0.1    | 0.1538 | 5 | 2 | [10,13] |
| chr7:107346923  | DLG      | coding_exon | ENST00000205402:KtoE;ENST00000417551:KtoE;ENST00000437604:KtoE;ENST00000437604:KtoE; | + | Atog | 0.1    | 0.1818 | 6 | 2 | [10,11] |
| chr13:49577189  | DLEU1    | UTR3        |                                                                                      | + | Atog | 0.1    | 0.1    | 3 | 2 | [10,10] |
| chr3:198255912  | DLG1     | coding_exon |                                                                                      | - | TtoC | 0.1    | 0.2    | 3 | 3 | [10,25] |
| chr3:198351497  | DLG1     | coding_exon |                                                                                      | - | TtoC | 0.1    | 0.1    | 5 | 2 | [10,20] |
| chr3:198255205  | DLG1     | UTR3        |                                                                                      | - | CtoG | 0.4667 | 0.5909 | 2 | 2 | [15,22] |
| chr20:34558868  | DLGAP4   | mixed       |                                                                                      | + | Atog | 0.125  | 0.125  | 2 | 2 | [16,16] |
| chr14:54695029  | DLGAP5   | coding_exon | ENST00000247191:FtoI;ENST00000341764:FtoI;ENST00000395425:FtoI;                      | - | TtoA | 0.1    | 0.1    | 3 | 2 | [10,10] |
| chr1:44458924   | DMAP1    | UTR3        |                                                                                      | + | TtoA | 0.1    | 0.2    | 3 | 2 | [10,10] |
| chr19:50975066  | DMPK     | coding_exon | ENST00000343373:GtoD;ENST00000348168:GtoD;ENST00000354227:GtoD;                      | - | GtoA | 0.1    | 0.2    | 2 | 2 | [10,10] |
| chr7:86660605   | DMTF1    | mixed       |                                                                                      | + | CtoG | 0.1    | 0.1429 | 6 | 2 | [10,14] |
| chr7:86662677   | DMTF1    | UTR3        |                                                                                      | + | TtoA | 0.1    | 0.1667 | 7 | 2 | [11,12] |
| chr19:50981633  | DMWD     | coding_exon | ENST00000270223:LtoI;ENST00000377735:LtoI;                                           | - | CtoA | 0.1333 | 0.15   | 3 | 2 | [15,20] |
| chr5:118567028  | DMXL1    | coding_exon | ENST00000311085:EtoK;                                                                | + | GtoA | 0.125  | 0.125  | 2 | 2 | [16,16] |
| chr15:49560583  | DMXL2    | coding_exon |                                                                                      | - | GtoA | 0.1    | 0.1    | 2 | 2 | [10,10] |
| chr10:69860283  | DNA2     | coding_exon | ENST00000433594:LtoQ;                                                                | - | TtoA | 0.1    | 0.1429 | 2 | 2 | [10,14] |
| chr10:69846613  | DNA2     | coding_exon |                                                                                      | - | TtoG | 0.1    | 0.1    | 2 | 2 | [10,10] |
| chr10:69866844  | DNA2     | mixed       |                                                                                      | - | TtoG | 0.1    | 0.125  | 3 | 2 | [10,16] |
| chr16:45547916  | DNAJ2    | UTR3        |                                                                                      | - | TtoC | 0.1    | 0.2    | 5 | 2 | [10,10] |
| chr4:101046735  | DNAJB14  | coding_exon | ENST00000337833:Rto*;ENST00000442697:Rto*;                                           | - | CtoT | 0.3125 | 0.4    | 3 | 2 | [10,16] |
| chr4:101045852  | DNAJB14  | coding_exon | ENST00000337833:ltoK;ENST00000442697:ltoK;                                           | - | TtoA | 0.1    | 0.2    | 2 | 2 | [10,10] |
| chr2:219858590  | DNAJB2   | mixed       |                                                                                      | + | Atot | 0.1    | 0.1818 | 2 | 2 | [10,11] |
| chr7:156848642  | DNAJB6   | coding_exon | ENST00000262177:HtoR;ENST00000413963:HtoR;ENST00000429029:HtoR;ENST00000429029:HtoR; | + | Atog | 0.1026 | 0.1333 | 3 | 2 | [15,39] |
| chr10:22085650  | DNAJC1   | coding_exon | ENST00000376980:VtoA;                                                                | - | TtoC | 0.1    | 0.3636 | 6 | 4 | [10,41] |
| chr10:22233482  | DNAJC1   | coding_exon |                                                                                      | - | TtoA | 0.1053 | 0.1053 | 2 | 2 | [19,19] |
| chr3:133700731  | DNAJC13  | coding_exon | ENST00000260818:LtoI;                                                                | + | CtoA | 0.1    | 0.1111 | 2 | 2 | [10,18] |
| chr3:133718344  | DNAJC13  | coding_exon |                                                                                      | + | TtoC | 0.1    | 0.1    | 2 | 2 | [10,20] |
| chr12:54507616  | DNAJC14  | coding_exon | ENST00000317269:LtoH;                                                                | - | TtoA | 0.1    | 0.1818 | 5 | 2 | [10,11] |
| chr12:54501223  | DNAJC14  | UTR3        |                                                                                      | - | Atog | 0.1    | 0.2    | 6 | 4 | [10,26] |
| chr1:15782318   | DNAJC16  | mixed       |                                                                                      | + | GtoC | 0.1    | 0.1    | 3 | 2 | [10,10] |
| chr15:38853904  | DNAJC17  | coding_exon | ENST00000220496:VtoA;                                                                | - | TtoC | 0.1    | 0.1053 | 3 | 2 | [20,20] |
| chr11:63756515  | DNAJC4   | coding_exon | ENST00000321460:HtoP;ENST00000321685:HtoP;                                           | + | Atoc | 0.1111 | 0.1111 | 6 | 2 | [27,45] |
| chr17:37382058  | DNAJC7   | UTR3        |                                                                                      | - | Atog | 0.2    | 0.2    | 4 | 2 | [10,10] |
| chr1:28432104   | DNAJC8   | UTR5        |                                                                                      | - | CtoT | 0.1    | 0.1538 | 2 | 2 | [10,13] |
| chr10:74676466  | DNAJC9   | coding_exon | ENST00000372950:LtoV;                                                                | - | CtoG | 0.1071 | 0.1333 | 6 | 3 | [15,35] |
| chr16:3648038   | DNASE1   | mixed       |                                                                                      | + | CtoT | 0.7273 | 0.7857 | 3 | 3 | [11,14] |
| chr16:3648040   | DNASE1   | mixed       |                                                                                      | + | CtoT | 0.1    | 0.1111 | 6 | 2 | [10,18] |
| chr3:58166285   | DNASE1L3 | coding_exon |                                                                                      | - | TtoC | 0.1    | 0.1154 | 3 | 2 | [10,26] |
| chr12:32784674  | DNM1L    | coding_exon | ENST00000266479:LtoH;ENST00000266481:LtoH;ENST00000358214:LtoH;ENST00000358214:LtoH; | + | TtoA | 0.125  | 0.125  | 4 | 2 | [16,17] |
| chr12:32787935  | DNM1L    | mixed       |                                                                                      | + | TtoA | 0.1    | 0.1    | 2 | 2 | [10,10] |
| chr19:10796797  | DNM2     | coding_exon | ENST00000314646:VtoG;ENST00000355667:VtoG;ENST00000359692:VtoG;ENST00000359692:VtoG; | + | TtoG | 0.1304 | 0.1667 | 3 | 2 | [23,30] |
| chr19:10803567  | DNM2     | UTR3        |                                                                                      | + | GtoA | 0.1    | 0.1    | 3 | 2 | [10,10] |
| chr10:101638609 | DNMBP    | coding_exon | ENST00000324109:VtoA;ENST00000342239:VtoA;ENST00000393570:VtoA;                      | - | TtoC | 0.1    | 0.1333 | 3 | 2 | [10,16] |
| chr10:101626185 | DNMBP    | UTR3        |                                                                                      | - | CtoA | 0.1    | 0.1333 | 2 | 2 | [10,15] |
| chr2:25312137   | DNMT3A   | coding_exon | ENST00000264709:HtoR;ENST00000321117:HtoR;ENST00000380746:HtoR;ENST00000380746:HtoR; | - | Atog | 0.1538 | 0.1667 | 3 | 2 | [12,13] |
| chr2:25358093   | DNMT3A   | mixed       |                                                                                      | - | CtoA | 0.1    | 0.1    | 2 | 2 | [10,10] |
| chr2:25309927   | DNMT3A   | UTR3        |                                                                                      | - | TtoA | 0.1    | 0.1053 | 5 | 2 | [10,19] |
| chr2:219960095  | DNPEP    | mixed       |                                                                                      | - | TtoG | 0.125  | 0.1379 | 5 | 2 | [16,29] |
| chr20:43863480  | DNTTIP1  | coding_exon | ENST00000372605:HtoQ;ENST00000372614:HtoQ;ENST00000372622:HtoQ;ENST00000372622:HtoQ; | + | TtoA | 0.1    | 0.1333 | 3 | 2 | [10,15] |
| chr20:43873432  | DNTTIP1  | UTR3        |                                                                                      | + | TtoA | 0.1    | 0.1111 | 4 | 2 | [10,11] |
| chr2:225380632  | DOCK10   | coding_exon | ENST00000258390:NtoK;ENST00000373702:NtoK;ENST00000409592:NtoK;                      | - | TtoA | 0.1    | 0.2    | 2 | 2 | [10,20] |
| chr2:225380633  | DOCK10   | coding_exon | ENST00000258390:NtoI;ENST00000373702:NtoI;ENST00000409592:NtoI;                      | - | Atot | 0.1053 | 0.1667 | 2 | 2 | [12,19] |
| chr2:225359995  | DOCK10   | coding_exon |                                                                                      | - | Atog | 0.1364 | 0.2    | 4 | 2 | [11,22] |
| chr2:225407171  | DOCK10   | mixed       |                                                                                      | - | TtoA | 0.1042 | 0.1667 | 4 | 2 | [13,49] |
| chr19:11174362  | DOCK6    | coding_exon |                                                                                      | - | CtoT | 0.1    | 0.2    | 2 | 2 | [10,10] |
| chr5:176864352  | DOK3     | coding_exon | ENST00000312943:KtoQ;ENST00000357198:KtoQ;ENST00000377112:KtoQ;ENST00000377112:KtoQ; | - | Atoc | 0.125  | 0.1818 | 8 | 2 | [11,16] |
| chr5:176863573  | DOK3     | mixed       |                                                                                      | - | TtoC | 0.1    | 0.1    | 2 | 2 | [20,20] |
| chr16:56064582  | DOK4     | UTR3        |                                                                                      | - | TtoC | 0.1    | 0.1    | 2 | 2 | [10,10] |
| chr9:130891469  | DOLPP1   | UTR3        |                                                                                      | + | Atog | 0.1    | 0.1    | 2 | 2 | [10,10] |
| chr6:83934343   | DOPEY1   | coding_exon | ENST00000237163:EtoG;ENST00000349129:EtoG;ENST00000369739:EtoG;                      | + | Atog | 0.1    | 0.12   | 2 | 2 | [10,25] |
| chr19:2162751   | DOT1L    | coding_exon | ENST00000221482:EtoD;ENST00000398665:EtoD;                                           | + | GtoT | 0.1    | 0.1    | 2 | 2 | [10,10] |
| chr19:2136890   | DOT1L    | coding_exon |                                                                                      | + | TtoA | 0.1    | 0.125  | 3 | 2 | [11,26] |
| chr11:118473914 | DPAGT1   | coding_exon | ENST00000354202:MtoV;ENST00000409993:MtoV;ENST00000432443:MtoV;                      | - | Atog | 0.1111 | 0.1176 | 5 | 3 | [17,18] |
| chr16:66579366  | DPEP2    | mixed       |                                                                                      | - | TtoC | 0.1    | 0.1    | 2 | 2 | [10,10] |
| chr17:1893444   | DPH1     | UTR3        |                                                                                      | + | GtoT | 0.1    | 0.1    | 3 | 2 | [10,10] |
| chr3:16281325   | DPH3     | coding_exon |                                                                                      | - | GtoA | 0.1034 | 0.3913 | 4 | 2 | [23,29] |
| chr3:16281379   | DPH3     | coding_exon |                                                                                      | - | GtoA | 0.1176 | 0.1818 | 5 | 4 | [11,26] |
| chr1:101251906  | DPH5     | coding_exon | ENST00000342173:RtoI;ENST00000370106:RtoI;ENST00000370109:RtoI;ENST00000370109:RtoI; | - | GtoT | 0.1    | 0.1    | 2 | 2 | [10,10] |
| chr1:101259848  | DPH5     | coding_exon | ENST00000342173:DtoG;ENST00000370106:DtoG;ENST00000370109:DtoG;ENST00000370109:DtoG; | - | Atog | 0.1    | 0.1818 | 4 | 2 | [10,12] |

|                 |          |             |                                                                                                           |   |      |        |        |    |    |            |
|-----------------|----------|-------------|-----------------------------------------------------------------------------------------------------------|---|------|--------|--------|----|----|------------|
| chr20:49008458  | DPM1     | coding_exon |                                                                                                           | - | TtoC | 0.1111 | 0.1538 | 2  | 2  | [18,26]    |
| chr1:153379026  | DPM3     | mixed       |                                                                                                           | - | TtoC | 0.1    | 0.1538 | 4  | 2  | [11,13]    |
| chr9:139128755  | DPP7     | coding_exon | ENST00000443858:StoP;                                                                                     | - | TtoC | 0.4773 | 0.5065 | 2  | 2  | [44,77]    |
| chr9:139128590  | DPP7     | coding_exon | ENST00000371579:AtoP;ENST00000443858:GtoA;                                                                | - | GtoC | 0.5581 | 0.6118 | 2  | 2  | [85,86]    |
| chr15:63524509  | DPP8     | UTR3        |                                                                                                           | - | TtoC | 0.1429 | 0.2    | 5  | 2  | [11,21]    |
| chr15:63524675  | DPP8     | UTR3        |                                                                                                           | - | TtoC | 0.1    | 0.1    | 2  | 2  | [10,10]    |
| chr19:4665114   | DPP9     | coding_exon | ENST00000262959:StoP;ENST00000262960:StoP;                                                                | - | TtoC | 0.125  | 0.1905 | 4  | 3  | [21,47]    |
| chr19:4665110   | DPP9     | coding_exon | ENST00000262959:HtoP;ENST00000262960:HtoP;                                                                | - | Atoc | 0.1429 | 0.25   | 3  | 2  | [16,35]    |
| chr19:4645802   | DPP9     | coding_exon | ENST00000262959:Eto*;ENST00000262960:Eto*;                                                                | - | GtoT | 0.1    | 0.1    | 2  | 2  | [10,10]    |
| chr12:100839291 | DRAM1    | UTR3        |                                                                                                           | + | CtoG | 0.1    | 0.1818 | 11 | 7  | [10,32]    |
| chr12:100839292 | DRAM1    | UTR3        |                                                                                                           | + | TtoA | 0.1071 | 0.1429 | 8  | 4  | [14,30]    |
| chr22:30160165  | DRG1     | UTR3        |                                                                                                           | + | TtoA | 0.1    | 0.1818 | 10 | 4  | [10,21]    |
| chr22:30160172  | DRG1     | UTR3        |                                                                                                           | + | Atog | 0.1    | 0.1429 | 5  | 2  | [10,14]    |
| chr6:56484022   | DST      | coding_exon | ENST00000244364:StoC;ENST00000312431:StoC;ENST00000340834:StoC;ENST00000340834:StoR;ENST00000340834:StoT; | - | Atot | 0.1    | 0.1538 | 5  | 2  | [10,13]    |
| chr6:56482426   | DST      | coding_exon | ENST00000244364:GtoR;ENST00000312431:GtoR;ENST00000340834:GtoR;ENST00000340834:GtoT;                      | - | GtoA | 0.1    | 0.1    | 3  | 2  | [10,10]    |
| chr6:56441754   | DST      | coding_exon |                                                                                                           | - | CtoT | 0.125  | 0.5    | 7  | 5  | [12,30]    |
| chr20:17529435  | DSTN     | coding_exon | ENST00000246069:KtoR;ENST00000403962:KtoR;                                                                | + | Atog | 0.1333 | 0.2    | 3  | 2  | [15,20]    |
| chr20:17536857  | DSTN     | UTR3        |                                                                                                           | + | TtoA | 0.1111 | 0.1818 | 2  | 2  | [10,11]    |
| chr1:210342893  | DTL      | mixed       |                                                                                                           | + | Atog | 0.1    | 0.1111 | 4  | 2  | [11,18]    |
| chr1:210343230  | DTL      | UTR3        |                                                                                                           | + | CtoA | 0.1176 | 0.4    | 8  | 3  | [10,17]    |
| chr2:25497593   | DTNB     | coding_exon |                                                                                                           | - | CtoT | 0.1    | 0.1667 | 3  | 3  | [10,18]    |
| chr11:58730248  | DTX4     | UTR3        |                                                                                                           | + | TtoA | 0.1    | 0.1053 | 4  | 2  | [10,19]    |
| chr10:112261285 | DUSP     | UTR3        |                                                                                                           | + | GtoA | 0.1    | 0.2174 | 4  | 3  | [10,23]    |
| chr1:159933267  | DUSP12   | coding_exon | ENST00000367943:GtoD;                                                                                     | + | GtoA | 0.1    | 0.1    | 2  | 2  | [10,10]    |
| chr17:32946718  | DUSP14   | coding_exon |                                                                                                           | + | TtoC | 0.1    | 0.1333 | 3  | 2  | [10,15]    |
| chr12:12565637  | DUSP16   | UTR5        |                                                                                                           | - | Atoc | 0.1    | 0.1111 | 2  | 2  | [10,18]    |
| chr2:96172669   | DUSP2    | UTR3        |                                                                                                           | - | TtoA | 0.12   | 0.25   | 4  | 3  | [12,26]    |
| chr8:29249102   | DUSP4    | UTR3        |                                                                                                           | - | Atog | 0.1176 | 0.1765 | 5  | 2  | [17,17]    |
| chr3:52063035   | DUSP7    | coding_exon | ENST00000296483:NtoD;ENST00000495880:NtoD;                                                                | - | Atog | 0.1    | 0.1    | 2  | 2  | [10,10]    |
| chr15:46421597  | DUT      | UTR3        |                                                                                                           | + | TtoC | 0.1    | 0.1    | 2  | 2  | [10,10]    |
| chr15:46421611  | DUT      | UTR3        |                                                                                                           | + | TtoA | 0.1    | 0.1    | 2  | 2  | [10,10]    |
| chr15:46421899  | DUT      | UTR3        |                                                                                                           | + | TtoA | 0.1    | 0.1    | 6  | 2  | [10,10]    |
| chr15:46422277  | DUT      | UTR3        |                                                                                                           | + | Atog | 0.1538 | 0.2222 | 3  | 2  | [10,13]    |
| chr15:46422714  | DUT      | UTR3        |                                                                                                           | + | TtoC | 0.1538 | 0.3333 | 5  | 2  | [10,13]    |
| chr18:44877822  | DYM      | coding_exon | ENST00000269445:VtoA;ENST00000442713:VtoA;                                                                | - | TtoC | 0.1    | 0.1176 | 4  | 2  | [17,20]    |
| chr18:45062386  | DYM      | coding_exon |                                                                                                           | - | TtoC | 0.1    | 0.1364 | 7  | 2  | [10,22]    |
| chr14:101548481 | DYNC1H1  | coding_exon | ENST00000360184:VtoD;                                                                                     | + | TtoA | 0.1    | 0.1538 | 4  | 2  | [10,13]    |
| chr14:101537742 | DYNC1H1  | coding_exon | ENST00000360184:StoP;                                                                                     | + | TtoC | 0.1    | 0.125  | 3  | 2  | [10,24]    |
| chr14:101553304 | DYNC1H1  | coding_exon | ENST00000360184:LtoM;                                                                                     | + | CtoA | 0.1    | 0.1176 | 4  | 2  | [10,17]    |
| chr14:101531293 | DYNC1H1  | coding_exon | ENST00000360184:HtoR;                                                                                     | + | Atog | 0.1    | 0.1    | 3  | 2  | [10,10]    |
| chr3:32553522   | DYNC1L1  | coding_exon | ENST00000273130:KtoE;ENST00000432458:KtoE;                                                                | - | Atog | 0.1    | 0.125  | 4  | 2  | [10,16]    |
| chr3:32544979   | DYNC1L1  | coding_exon |                                                                                                           | - | TtoC | 0.1    | 0.1538 | 5  | 2  | [10,13]    |
| chr16:65327648  | DYNC1L2  | coding_exon | ENST00000258198:FtoC;ENST00000379482:FtoC;ENST00000443351:VtoG;                                           | - | TtoG | 0.1    | 0.1    | 2  | 2  | [10,10]    |
| chr16:65315065  | DYNC1L2  | mixed       |                                                                                                           | - | Atog | 0.1    | 0.1429 | 2  | 2  | [10,14]    |
| chr21:37787277  | DYRK1A   | coding_exon | ENST00000321219:LtoP;ENST00000338785:LtoP;ENST00000339659:LtoP;ENST00000339659:LtoT;                      | + | TtoC | 0.1    | 0.15   | 3  | 2  | [20,20]    |
| chr21:37787275  | DYRK1A   | coding_exon |                                                                                                           | + | CtoT | 0.1    | 0.1    | 2  | 2  | [10,10]    |
| chr12:66338107  | DYRK2    | coding_exon | ENST00000319833:StoP;ENST00000344096:StoP;ENST00000393555:StoP;                                           | + | TtoC | 0.1    | 0.1429 | 2  | 2  | [14,20]    |
| chr12:66342538  | DYRK2    | mixed       |                                                                                                           | + | TtoC | 0.1    | 0.1    | 2  | 2  | [10,10]    |
| chr12:4592939   | DYRK4    | coding_exon | ENST0000010132:AtoE;                                                                                      | + | CtoA | 0.1053 | 0.1667 | 8  | 4  | [12,19]    |
| chr20:31728446  | E2F1     | coding_exon | ENST00000343380:EtoG;ENST00000402461:EtoG;                                                                | - | Atog | 0.1    | 0.1429 | 2  | 2  | [21,30]    |
| chr20:31727185  | E2F1     | UTR3        |                                                                                                           | - | TtoC | 0.1    | 0.2222 | 3  | 3  | [10,18]    |
| chr1:23705644   | E2F2     | UTR3        |                                                                                                           | - | Atot | 0.1    | 0.1667 | 2  | 2  | [10,12]    |
| chr3:15458215   | EAF1     | UTR3        |                                                                                                           | + | CtoA | 0.1    | 0.1    | 2  | 2  | [10,10]    |
| chr3:123074303  | EAF2     | coding_exon |                                                                                                           | + | TtoC | 0.1304 | 0.1333 | 3  | 2  | [15,23]    |
| chr16:23442024  | EARS2    | UTR3        |                                                                                                           | - | TtoC | 0.1    | 0.1    | 2  | 2  | [10,20]    |
| chr16:23442292  | EARS2    | UTR3        |                                                                                                           | - | TtoC | 0.1579 | 0.1667 | 2  | 2  | [12,19]    |
| chr16:23443180  | EARS2    | UTR3        |                                                                                                           | - | TtoC | 0.1    | 0.1176 | 4  | 2  | [17,20]    |
| chr5:158156060  | EBF1     | coding_exon |                                                                                                           | - | TtoA | 0.1429 | 0.1579 | 4  | 2  | [14,19]    |
| chr1:43465342   | EBNA1BP2 | mixed       |                                                                                                           | - | Atog | 0.1    | 0.1333 | 4  | 2  | [10,15]    |
| chr13:49132910  | EBPL     | UTR3        |                                                                                                           | - | Atog | 0.1    | 0.125  | 3  | 2  | [10,25]    |
| chr10:74578084  | ECD      | coding_exon | ENST00000372979:WtoR;ENST00000430082:WtoR;ENST00000454759:WtoR;                                           | - | TtoC | 0.125  | 0.1667 | 6  | 2  | [12,32]    |
| chr10:74567798  | ECD      | coding_exon | ENST00000372979:DtoE;ENST00000430082:DtoE;ENST00000454759:DtoE;                                           | - | TtoA | 0.1    | 0.1538 | 4  | 4  | [10,16]    |
| chr10:74597636  | ECD      | UTR5        |                                                                                                           | - | TtoG | 0.1111 | 0.1667 | 5  | 2  | [12,27]    |
| chr1:21416529   | ECE1     | UTR3        |                                                                                                           | - | Atoc | 0.1    | 0.2105 | 3  | 2  | [10,19]    |
| chr6:127651595  | ECHDC1   | UTR3        |                                                                                                           | - | Atog | 0.1    | 0.1667 | 3  | 2  | [10,12]    |
| chr6:127652225  | ECHDC1   | UTR3        |                                                                                                           | - | GtoT | 0.1    | 0.1    | 2  | 2  | [10,10]    |
| chr15:72735372  | EDC3     | coding_exon | ENST00000315127:FtoS;ENST00000426797:FtoS;                                                                | - | TtoC | 0.1    | 0.1    | 2  | 2  | [10,10]    |
| chr15:72710133  | EDC3     | UTR3        |                                                                                                           | - | TtoC | 0.1    | 0.125  | 4  | 3  | [10,16]    |
| chr16:66475801  | EDC4     | UTR3        |                                                                                                           | + | CtoG | 0.1    | 0.1304 | 8  | 4  | [10,23]    |
| chr16:66475807  | EDC4     | UTR3        |                                                                                                           | + | TtoG | 0.1    | 0.1    | 2  | 2  | [10,10]    |
| chr3:5234190    | EDEM1    | UTR3        |                                                                                                           | + | GtoA | 0.1    | 0.1    | 3  | 2  | [10,10]    |
| chr3:5235444    | EDEM1    | UTR3        |                                                                                                           | + | TtoG | 0.4225 | 0.4514 | 2  | 2  | [71,144]   |
| chr3:5235445    | EDEM1    | UTR3        |                                                                                                           | + | CtoA | 0.3594 | 0.4207 | 2  | 2  | [64,145]   |
| chr9:138876631  | EDF1     | mixed       |                                                                                                           | - | TtoG | 0.1071 | 0.2222 | 3  | 3  | [18,36]    |
| chr12:91775347  | EEA1     | coding_exon |                                                                                                           | - | TtoG | 0.1667 | 0.2    | 3  | 2  | [10,12]    |
| chr11:85633492  | EED      | UTR5        |                                                                                                           | + | GtoT | 0.1    | 0.1429 | 3  | 2  | [10,14]    |
| chr11:85633577  | EED      | UTR5        |                                                                                                           | + | TtoG | 0.1389 | 0.1538 | 6  | 3  | [13,36]    |
| chr6:74283487   | EEF1A1   | UTR3        |                                                                                                           | - | TtoA | 0.1    | 0.1    | 4  | 2  | [10,10]    |
| chr6:74283957   | EEF1A1   | UTR3        |                                                                                                           | - | CtoA | 0.1538 | 0.4    | 4  | 3  | [10,13]    |
| chr6:74283958   | EEF1A1   | UTR3        |                                                                                                           | - | CtoA | 0.1176 | 0.4167 | 5  | 5  | [10,17]    |
| chr6:74286508   | EEF1A1   | UTR5        |                                                                                                           | - | CtoG | 0.1    | 0.1538 | 5  | 3  | [10,20]    |
| chr6:74287476   | EEF1A1   | UTR5        |                                                                                                           | - | CtoT | 0.1429 | 0.4643 | 12 | 11 | [12,58]    |
| chr6:74287477   | EEF1A1   | UTR5        |                                                                                                           | - | TtoG | 0.1111 | 0.3871 | 11 | 7  | [11,34]    |
| chr2:20673586   | EEF1B2   | coding_exon | ENST00000236957:VtoG;ENST00000392221:VtoG;ENST00000392222:VtoG;                                           | + | TtoG | 0.1178 | 0.1908 | 2  | 2  | [887,1266] |
| chr2:206735873  | EEF1B2   | UTR3        |                                                                                                           | + | Atog | 0.1061 | 0.2935 | 17 | 16 | [68,201]   |
| chr2:206735874  | EEF1B2   | UTR3        |                                                                                                           | + | TtoA | 0.1048 | 0.1379 | 13 | 4  | [30,109]   |
| chr2:206732768  | EEF1B2   | UTR5        |                                                                                                           | + | GtoT | 0.1    | 0.1    | 4  | 2  | [10,10]    |
| chr2:206732863  | EEF1B2   | UTR5        |                                                                                                           | + | TtoG | 0.1    | 0.1667 | 4  | 3  | [10,13]    |
| chr19:3930885   | EEF2     | coding_exon | ENST00000309311:VtoG;                                                                                     | - | TtoG | 0.114  | 0.1161 | 2  | 2  | [732,1669] |
| chr19:3927055   | EEF2     | UTR3        |                                                                                                           | - | GtoA | 0.1008 | 0.1757 | 15 | 5  | [74,270]   |
| chr19:3927059   | EEF2     | UTR3        |                                                                                                           | - | TtoC | 0.1003 | 0.1576 | 17 | 11 | [150,643]  |
| chr16:22175654  | EEF2K    | coding_exon | ENST00000263026:KtoE;                                                                                     | + | Atog | 0.1    | 0.1    | 6  | 2  | [10,10]    |
| chr3:129448483  | EEFSEC   | coding_exon | ENST00000254730:VtoE;ENST00000483457:VtoE;                                                                | + | TtoA | 0.1    | 0.1111 | 2  | 2  | [10,10]    |
| chr3:129609858  | EEFSEC   | UTR3        |                                                                                                           | + | Atog | 0.1    | 0.1111 | 3  | 2  | [10,19]    |
| chr3:129609968  | EEFSEC   | UTR3        |                                                                                                           | + | TtoC | 0.1667 | 0.2    | 3  | 2  | [10,12]    |
| chr5:106750835  | EFNA5    | coding_exon | ENST00000333274:DtoN;                                                                                     | - | GtoA | 0.1538 | 0.1538 | 2  | 2  | [13,13]    |

|                 |          |             |                                                                       |   |      |        |        |    |    |           |
|-----------------|----------|-------------|-----------------------------------------------------------------------|---|------|--------|--------|----|----|-----------|
| chr5:106744139  | EFNA5    | UTR3        |                                                                       | - | TtoA | 0.1    | 0.1    | 2  | 2  | [10,10]   |
| chr8:133093999  | EFR3A    | UTR3        |                                                                       | + | Atog | 0.1    | 0.1    | 3  | 2  | [10,10]   |
| chr8:133094395  | EFR3A    | UTR3        |                                                                       | + | Atog | 0.1333 | 0.1818 | 3  | 2  | [11,15]   |
| chr1:229566984  | EGLN1    | UTR3        |                                                                       | - | GtoA | 0.1    | 0.2    | 5  | 3  | [10,20]   |
| chr1:229567146  | EGLN1    | UTR3        |                                                                       | - | TtoG | 0.1    | 0.1053 | 2  | 2  | [10,19]   |
| chr5:137832173  | EGR1     | UTR3        |                                                                       | + | GtoA | 0.1    | 0.1    | 3  | 2  | [10,10]   |
| chr5:137832251  | EGR1     | UTR3        |                                                                       | + | CtoT | 0.1    | 0.1    | 3  | 2  | [10,10]   |
| chr5:137832831  | EGR1     | UTR3        |                                                                       | + | TtoG | 0.1429 | 0.1667 | 3  | 2  | [12,14]   |
| chr11:64377203  | EHD1     | UTR3        |                                                                       | - | Atog | 0.3333 | 0.5    | 3  | 3  | [11,22]   |
| chr9:13972187   | EHMT1    | coding_exon |                                                                       | + | TtoA | 0.1    | 0.1    | 3  | 2  | [10,10]   |
| chr6:31968243   | EHMT2    | coding_exon | ENST00000375528:VtoR;ENST00000375530:VtoR;ENST00000375537:VtoR;ENST   | - | TtoC | 0.1    | 0.1667 | 3  | 3  | [10,15]   |
| chr6:31962380   | EHMT2    | coding_exon | ENST00000375528:VtoA;ENST00000375530:VtoA;ENST00000375537:VtoA;ENST00 | - | TtoC | 0.1053 | 0.1538 | 7  | 3  | [13,38]   |
| chr11:124957509 | EI24     | coding_exon | ENST00000343678:RtoT;                                                 | + | GtoC | 0.1429 | 0.4    | 4  | 4  | [10,15]   |
| chr11:124951409 | EI24     | coding_exon |                                                                       | + | TtoC | 0.1    | 0.1154 | 3  | 2  | [10,27]   |
| chr17:37100777  | EIF1     | UTR3        |                                                                       | + | Atog | 0.1011 | 0.211  | 7  | 3  | [11,291]  |
| chr17:37100778  | EIF1     | UTR3        |                                                                       | + | TtoA | 0.1176 | 0.3125 | 7  | 4  | [70,178]  |
| chr11:65520925  | EIF1AD   | UTR3        |                                                                       | - | TtoA | 0.1    | 0.1    | 2  | 2  | [10,10]   |
| chr11:65521585  | EIF1AD   | UTR3        |                                                                       | - | GtoT | 0.1    | 0.1176 | 2  | 2  | [10,17]   |
| chr7:6030530    | EIF2AK1  | UTR3        |                                                                       | - | GtoT | 0.1154 | 0.2222 | 6  | 4  | [18,29]   |
| chr7:6030531    | EIF2AK1  | UTR3        |                                                                       | - | CtoT | 0.12   | 0.2632 | 7  | 4  | [13,31]   |
| chr7:6030532    | EIF2AK1  | UTR3        |                                                                       | - | CtoT | 0.1111 | 0.1154 | 4  | 3  | [18,27]   |
| chr7:6030536    | EIF2AK1  | UTR3        |                                                                       | - | GtoT | 0.1333 | 0.3333 | 2  | 2  | [12,15]   |
| chr2:37203242   | EIF2AK2  | coding_exon | ENST00000233057:CtoW;ENST00000343510:CtoW;ENST00000395127:CtoW;ENST   | - | TtoG | 0.1176 | 0.2    | 3  | 2  | [10,17]   |
| chr2:37180827   | EIF2AK2  | UTR3        |                                                                       | - | TtoG | 0.1    | 0.1765 | 7  | 2  | [10,18]   |
| chr2:37181094   | EIF2AK2  | UTR3        |                                                                       | - | Atog | 0.1111 | 0.3478 | 13 | 13 | [11,35]   |
| chr2:37181118   | EIF2AK2  | UTR3        |                                                                       | - | Atog | 0.1163 | 0.2308 | 6  | 2  | [13,43]   |
| chr2:37181148   | EIF2AK2  | UTR3        |                                                                       | - | Atog | 0.1    | 0.1429 | 6  | 4  | [14,20]   |
| chr2:37181206   | EIF2AK2  | UTR3        |                                                                       | - | Atog | 0.2308 | 0.8333 | 9  | 8  | [10,30]   |
| chr2:37181512   | EIF2AK2  | UTR3        |                                                                       | - | Atog | 0.1053 | 0.28   | 12 | 10 | [15,26]   |
| chr2:37181517   | EIF2AK2  | UTR3        |                                                                       | - | Atog | 0.125  | 0.6429 | 17 | 17 | [14,37]   |
| chr2:37181520   | EIF2AK2  | UTR3        |                                                                       | - | Atog | 0.1081 | 0.2308 | 14 | 10 | [13,37]   |
| chr2:37181538   | EIF2AK2  | UTR3        |                                                                       | - | Atog | 0.6    | 1      | 17 | 17 | [10,32]   |
| chr2:37181546   | EIF2AK2  | UTR3        |                                                                       | - | Atog | 0.1    | 0.25   | 11 | 6  | [10,25]   |
| chr2:37181579   | EIF2AK2  | UTR3        |                                                                       | - | Atog | 0.1    | 0.4615 | 16 | 13 | [10,43]   |
| chr2:37181586   | EIF2AK2  | UTR3        |                                                                       | - | Atog | 0.1304 | 0.5714 | 20 | 19 | [12,49]   |
| chr2:37181591   | EIF2AK2  | UTR3        |                                                                       | - | Atog | 0.1053 | 0.4286 | 18 | 17 | [11,52]   |
| chr2:37181601   | EIF2AK2  | UTR3        |                                                                       | - | Atog | 0.2941 | 0.8095 | 18 | 18 | [10,54]   |
| chr2:37186353   | EIF2AK2  | UTR3        |                                                                       | - | Atot | 0.1    | 0.1818 | 2  | 2  | [10,11]   |
| chr2:88638078   | EIF2AK3  | UTR3        |                                                                       | - | Atog | 0.1    | 0.1667 | 4  | 3  | [10,12]   |
| chr1:45113953   | EIF2B3   | coding_exon | ENST00000360403:VtoA;ENST00000372183:VtoA;                            | - | TtoC | 0.1    | 0.1111 | 4  | 2  | [10,18]   |
| chr1:45119900   | EIF2B3   | coding_exon | ENST00000360403:DtoG;ENST00000372183:DtoG;                            | - | Atog | 0.1    | 0.1111 | 2  | 2  | [10,10]   |
| chr3:185338487  | EIF2B5   | coding_exon | ENST00000273783:VtoG;ENST0000044495:VtoG;                             | + | TtoG | 0.1667 | 0.2857 | 9  | 6  | [10,19]   |
| chr3:185338683  | EIF2B5   | coding_exon |                                                                       | + | TtoG | 0.1    | 0.2143 | 2  | 2  | [15,20]   |
| chr3:185371530  | EIF2B5   | coding_exon |                                                                       | + | TtoA | 0.1    | 0.1    | 2  | 2  | [10,10]   |
| chr3:185384554  | EIF2B5   | coding_exon |                                                                       | + | Atog | 0.1071 | 0.3125 | 11 | 6  | [17,36]   |
| chr3:185442906  | EIF2B5   | coding_exon |                                                                       | + | TtoC | 0.1    | 0.1    | 2  | 2  | [10,10]   |
| chr3:185458066  | EIF2B5   | coding_exon |                                                                       | + | Atog | 0.1    | 0.1    | 2  | 2  | [10,10]   |
| chr3:185458797  | EIF2B5   | coding_exon |                                                                       | + | CtoT | 0.1    | 0.3636 | 2  | 2  | [10,33]   |
| chr3:185509531  | EIF2B5   | coding_exon |                                                                       | + | Atog | 0.1429 | 0.2381 | 7  | 5  | [14,23]   |
| chr3:185509532  | EIF2B5   | coding_exon |                                                                       | + | Atog | 0.1    | 0.1    | 3  | 2  | [10,10]   |
| chr3:185532079  | EIF2B5   | coding_exon |                                                                       | + | CtoT | 0.5199 | 0.5331 | 2  | 2  | [302,427] |
| chr3:185535810  | EIF2B5   | coding_exon |                                                                       | + | TtoA | 0.1304 | 0.16   | 3  | 2  | [24,26]   |
| chr3:185535826  | EIF2B5   | coding_exon |                                                                       | + | Atog | 0.1    | 0.2    | 2  | 2  | [10,10]   |
| chr1:36158578   | EIF2C1   | UTR3        |                                                                       | + | TtoG | 0.1    | 0.1    | 2  | 2  | [10,10]   |
| chr1:36161283   | EIF2C1   | UTR3        |                                                                       | + | TtoC | 0.1    | 0.1    | 3  | 2  | [10,10]   |
| chr1:36161734   | EIF2C1   | UTR3        |                                                                       | + | GtoT | 0.1    | 0.1053 | 2  | 2  | [10,19]   |
| chr1:36161780   | EIF2C1   | UTR3        |                                                                       | + | Atot | 0.1    | 0.1    | 2  | 2  | [10,10]   |
| chr8:141618660  | EIF2C2   | coding_exon | ENST00000220592:FtoV;                                                 | - | TtoG | 0.1    | 0.1    | 3  | 2  | [10,10]   |
| chr14:66919976  | EIF2S1   | mixed       |                                                                       | + | CtoG | 0.1    | 0.1667 | 5  | 2  | [10,12]   |
| chr22:35236878  | EIF3D    | UTR3        |                                                                       | - | TtoA | 0.1538 | 0.3077 | 7  | 5  | [10,13]   |
| chr8:109330105  | EIF3E    | coding_exon | ENST00000220849:MtoL;                                                 | - | GtoC | 0.1    | 0.5714 | 12 | 8  | [10,38]   |
| chr8:109330104  | EIF3E    | coding_exon | ENST00000220849:AtoS;                                                 | - | GtoT | 0.1304 | 0.4286 | 11 | 7  | [10,30]   |
| chr11:7965485   | EIF3F    | coding_exon | ENST00000309828:PtoS;ENST00000449102:PtoS;                            | + | CtoT | 0.1053 | 0.4286 | 7  | 6  | [14,51]   |
| chr11:7973139   | EIF3F    | coding_exon | ENST00000309828:NtoK;ENST00000449102:NtoK;                            | + | CtoA | 0.1    | 0.1111 | 3  | 2  | [10,21]   |
| chr11:7973137   | EIF3F    | coding_exon | ENST00000309828:NtoD;ENST00000449102:NtoD;                            | + | Atog | 0.1395 | 0.48   | 13 | 13 | [17,72]   |
| chr11:7974276   | EIF3F    | UTR3        |                                                                       | + | CtoA | 0.1    | 0.1    | 5  | 3  | [10,11]   |
| chr11:7974277   | EIF3F    | UTR3        |                                                                       | + | CtoG | 0.125  | 0.2    | 3  | 2  | [10,16]   |
| chr19:10091571  | EIF3G    | UTR5        |                                                                       | - | GtoC | 0.1    | 0.1    | 2  | 2  | [10,10]   |
| chr19:43819430  | EIF3K    | UTR3        |                                                                       | + | TtoC | 0.1026 | 0.2727 | 19 | 14 | [25,69]   |
| chr19:43819432  | EIF3K    | UTR3        |                                                                       | + | Atog | 0.1111 | 0.1333 | 11 | 3  | [27,30]   |
| chr19:43819434  | EIF3K    | UTR3        |                                                                       | + | CtoA | 0.3684 | 0.75   | 12 | 12 | [10,33]   |
| chr19:43819435  | EIF3K    | UTR3        |                                                                       | + | CtoA | 0.3571 | 0.6364 | 2  | 2  | [12,15]   |
| chr22:36614582  | EIF3L    | UTR3        |                                                                       | + | Atog | 0.1029 | 0.1373 | 13 | 4  | [52,122]  |
| chr22:36614584  | EIF3L    | UTR3        |                                                                       | + | Atog | 0.1207 | 0.3333 | 16 | 10 | [16,62]   |
| chr22:36614585  | EIF3L    | UTR3        |                                                                       | + | TtoA | 0.3    | 0.5455 | 7  | 7  | [10,22]   |
| chr22:36614586  | EIF3L    | UTR3        |                                                                       | + | TtoA | 0.125  | 0.2222 | 2  | 2  | [10,16]   |
| chr17:7422739   | EIF4A1   | UTR3        |                                                                       | + | TtoC | 0.1    | 0.1538 | 4  | 2  | [13,20]   |
| chr17:7422742   | EIF4A1   | UTR3        |                                                                       | + | CtoA | 0.1154 | 0.1515 | 4  | 2  | [33,52]   |
| chr3:187989649  | EIF4A2   | coding_exon | ENST00000323963:IttoK;ENST00000356531:IttoK;ENST00000440191:IttoK;    | + | TtoA | 0.1333 | 0.1807 | 2  | 2  | [75,83]   |
| chr3:187990324  | EIF4A2   | UTR3        |                                                                       | + | TtoG | 0.1053 | 0.129  | 2  | 2  | [19,62]   |
| chr3:187990334  | EIF4A2   | UTR3        |                                                                       | + | GtoA | 0.1    | 0.1429 | 6  | 2  | [10,14]   |
| chr3:187990335  | EIF4A2   | UTR3        |                                                                       | + | TtoC | 0.1    | 0.1818 | 3  | 2  | [10,11]   |
| chr3:187984078  | EIF4A2   | UTR5        |                                                                       | + | Atog | 0.1    | 0.2    | 3  | 2  | [10,11]   |
| chr12:51720384  | EIF4B    | UTR3        |                                                                       | + | GtoA | 0.1429 | 0.1667 | 3  | 2  | [12,14]   |
| chr10:71854609  | EIF4EBP2 | UTR3        |                                                                       | + | Atog | 0.1    | 0.2143 | 2  | 2  | [10,14]   |
| chr10:71834160  | EIF4EBP2 | UTR5        |                                                                       | + | Atog | 0.1    | 0.125  | 2  | 2  | [10,24]   |
| chr11:10785472  | EIF4G2   | mixed       |                                                                       | - | Atot | 0.1026 | 0.1304 | 4  | 2  | [40,71]   |
| chr11:10775281  | EIF4G2   | UTR3        |                                                                       | - | TtoC | 0.1    | 0.1272 | 18 | 3  | [150,206] |
| chr1:21078405   | EIF4G3   | coding_exon | ENST00000264211:TtoP;ENST00000400422:TtoP;                            | - | Atoc | 0.125  | 0.125  | 4  | 2  | [16,17]   |
| chr1:21085282   | EIF4G3   | coding_exon | ENST00000264211:QtoR;ENST00000400422:QtoR;                            | - | Atog | 0.1    | 0.1538 | 2  | 2  | [10,13]   |
| chr1:21140627   | EIF4G3   | coding_exon | ENST00000264211:QtoR;ENST00000356916:QtoR;ENST00000400422:QtoR;       | - | Atog | 0.1    | 0.3077 | 6  | 3  | [10,18]   |
| chr1:21168555   | EIF4G3   | coding_exon | ENST00000264211:QtoP;ENST00000356916:QtoP;ENST00000400422:QtoP;       | - | Atoc | 0.1053 | 0.2727 | 5  | 3  | [11,19]   |
| chr1:21149190   | EIF4G3   | coding_exon | ENST00000264211:QtoL;ENST00000356916:QtoL;ENST00000400422:QtoL;       | - | Atot | 0.1333 | 0.2    | 4  | 2  | [10,15]   |
| chr1:21168554   | EIF4G3   | coding_exon | ENST00000264211:QtoH;ENST00000356916:QtoH;ENST00000400422:QtoH;       | - | GtoT | 0.1    | 0.3    | 6  | 5  | [10,20]   |
| chr1:21098926   | EIF4G3   | coding_exon | ENST00000264211:LtoQ;ENST00000374933:LtoQ;ENST00000400422:LtoQ;       | - | TtoA | 0.1    | 0.1    | 3  | 2  | [10,10]   |
| chr1:21059562   | EIF4G3   | coding_exon |                                                                       | - | TtoA | 0.1    | 0.1818 | 8  | 2  | [10,11]   |

|                 |         |             |                                                                                     |   |      |        |        |    |    |           |
|-----------------|---------|-------------|-------------------------------------------------------------------------------------|---|------|--------|--------|----|----|-----------|
| chr17:7156173   | EIF5A   | UTR3        |                                                                                     | + | AtoT | 0.1161 | 0.2651 | 4  | 2  | [83,155]  |
| chr17:7156483   | EIF5A   | UTR3        |                                                                                     | + | AtoG | 0.1    | 0.125  | 5  | 2  | [16,30]   |
| chr17:7156499   | EIF5A   | UTR3        |                                                                                     | + | GtoA | 0.1538 | 0.2667 | 6  | 5  | [10,15]   |
| chr2:99382378   | EIF5B   | UTR3        |                                                                                     | + | CtoA | 0.1    | 0.125  | 7  | 2  | [30,40]   |
| chr17:12836972  | ELAC2   | coding_exon | ENST00000338034:VtoG;ENST00000395962:VtoG;ENST00000424152:VtoG;ENST00000424152:VtoG | - | TtoG | 0.1    | 0.2    | 4  | 2  | [10,10]   |
| chr13:40454392  | ELF1    | UTR5        |                                                                                     | - | TtoC | 0.1    | 0.1    | 2  | 2  | [10,10]   |
| chr1:203850348  | ELK4    | UTR3        |                                                                                     | - | TtoC | 0.1    | 0.1    | 2  | 2  | [10,10]   |
| chr19:18416594  | ELL     | coding_exon | ENST00000262809:YtoN;                                                               | - | TtoA | 0.1154 | 0.1429 | 2  | 2  | [14,26]   |
| chr19:18414854  | ELL     | UTR3        |                                                                                     | - | AtoC | 0.1    | 0.1    | 2  | 2  | [10,10]   |
| chr19:18414867  | ELL     | UTR3        |                                                                                     | - | TtoC | 0.1    | 0.1    | 2  | 2  | [10,10]   |
| chr15:41852696  | ELL3    | coding_exon | ENST00000319359:EtoD;                                                               | - | AtoT | 0.1111 | 0.1111 | 2  | 2  | [10,18]   |
| chr20:44429249  | ELMO2   | UTR3        |                                                                                     | - | AtoG | 0.1    | 0.1    | 2  | 2  | [10,10]   |
| chr4:141694260  | ELMOD2  | UTR3        |                                                                                     | + | TtoA | 0.1    | 0.1    | 2  | 2  | [10,10]   |
| chr2:85470881   | ELMOD3  | coding_exon | ENST00000315658:StoP;ENST00000393852:StoP;ENST00000393856:StoP;ENST00000393856:StoP | + | TtoC | 0.1    | 0.1    | 3  | 2  | [10,10]   |
| chr8:28026505   | ELP3    | coding_exon |                                                                                     | + | TtoC | 0.1    | 0.125  | 2  | 2  | [10,16]   |
| chr17:45813597  | EME1    | UTR3        |                                                                                     | + | GtoT | 0.1    | 0.2    | 3  | 2  | [10,10]   |
| chr16:1768771   | EME2    | UTR3        |                                                                                     | + | GtoA | 0.1    | 0.1    | 2  | 2  | [10,10]   |
| chr12:6950352   | EMG1    | coding_exon | ENST00000261406:AtoV;ENST00000439543:AtoV;ENST00000451846:AtoV;                     | + | CtoT | 0.125  | 0.2143 | 4  | 3  | [12,16]   |
| chr12:6958112   | EMG1    | coding_exon |                                                                                     | + | TtoC | 0.1053 | 0.1538 | 3  | 2  | [13,19]   |
| chr22:27941548  | EMID1   | mixed       |                                                                                     | + | TtoC | 0.1    | 0.1111 | 2  | 2  | [10,19]   |
| chr2:42375837   | EML4    | coding_exon |                                                                                     | + | TtoA | 0.1111 | 0.2    | 4  | 3  | [10,17]   |
| chr19:53521905  | EMP3    | UTR5        |                                                                                     | + | AtoC | 0.1    | 0.1429 | 2  | 2  | [10,46]   |
| chr4:71740124   | ENAM    | mixed       |                                                                                     | + | TtoC | 0.1053 | 0.3636 | 3  | 3  | [11,64]   |
| chr4:71740541   | ENAM    | mixed       |                                                                                     | + | CtoG | 0.1163 | 0.2889 | 6  | 4  | [24,45]   |
| chr4:71740810   | ENAM    | mixed       |                                                                                     | + | GtoA | 0.1458 | 0.2    | 6  | 4  | [12,50]   |
| chr9:130623318  | ENDOG   | coding_exon |                                                                                     | + | AtoG | 0.1    | 0.1818 | 2  | 2  | [10,11]   |
| chr17:74595756  | ENGASE  | UTR3        |                                                                                     | + | GtoC | 0.1    | 0.1176 | 2  | 2  | [10,17]   |
| chr1:8845549    | ENO1    | coding_exon | ENST00000234590:YtoN;                                                               | - | TtoA | 0.1803 | 0.3929 | 8  | 7  | [16,65]   |
| chr1:8854549    | ENO1    | coding_exon | ENST00000234590:YtoH;                                                               | - | TtoC | 0.1111 | 0.1587 | 9  | 2  | [65,66]   |
| chr1:8854615    | ENO1    | coding_exon | ENST00000234590:VtoL;                                                               | - | GtoC | 0.1176 | 0.165  | 11 | 3  | [71,109]  |
| chr1:8850693    | ENO1    | coding_exon | ENST00000234590:VtoA;                                                               | - | TtoC | 0.1048 | 0.1692 | 9  | 2  | [68,330]  |
| chr1:8846682    | ENO1    | coding_exon | ENST00000234590:TtoP;                                                               | - | AtoC | 0.1292 | 0.2581 | 4  | 3  | [72,899]  |
| chr1:8857500    | ENO1    | coding_exon | ENST00000234590:TtoA;                                                               | - | AtoG | 0.1    | 0.1062 | 13 | 2  | [42,167]  |
| chr1:8848125    | ENO1    | coding_exon | ENST00000234590:LtoP;                                                               | - | TtoC | 0.1161 | 0.1961 | 9  | 6  | [55,176]  |
| chr1:8845552    | ENO1    | coding_exon | ENST00000234590:KtoE;                                                               | - | AtoG | 0.1019 | 0.1135 | 11 | 3  | [109,141] |
| chr1:8844063    | ENO1    | coding_exon | ENST00000234590:EtoD;                                                               | - | GtoT | 0.1522 | 0.2414 | 6  | 2  | [30,47]   |
| chr1:8854621    | ENO1    | coding_exon | ENST00000234590:AtoS;                                                               | - | GtoT | 0.1    | 0.1538 | 5  | 3  | [13,44]   |
| chr1:8854617    | ENO1    | coding_exon | ENST00000234590:AtoD;                                                               | - | CtoA | 0.1026 | 0.2316 | 15 | 10 | [28,167]  |
| chr1:8854624    | ENO1    | coding_exon |                                                                                     | - | AtoC | 0.1091 | 0.1538 | 5  | 2  | [13,56]   |
| chr1:8861358    | ENO1    | mixed       |                                                                                     | - | AtoG | 0.1538 | 0.1818 | 2  | 2  | [11,14]   |
| chr1:8843649    | ENO1    | UTR3        |                                                                                     | - | AtoG | 0.1    | 0.1    | 3  | 2  | [10,44]   |
| chr1:8843650    | ENO1    | UTR3        |                                                                                     | - | GtoA | 0.1053 | 0.1136 | 12 | 2  | [38,44]   |
| chr1:8843653    | ENO1    | UTR3        |                                                                                     | - | TtoA | 0.1    | 0.1351 | 16 | 5  | [66,118]  |
| chr1:8843654    | ENO1    | UTR3        |                                                                                     | - | AtoG | 0.1004 | 0.2695 | 18 | 17 | [96,503]  |
| chr12:6902706   | ENO2    | UTR3        |                                                                                     | + | TtoG | 0.1111 | 0.2941 | 8  | 5  | [10,38]   |
| chr12:6903118   | ENO2    | UTR3        |                                                                                     | + | TtoC | 0.2    | 0.6667 | 4  | 4  | [10,31]   |
| chr17:4800624   | ENO3    | coding_exon | ENST00000323997:VtoG;ENST00000381335:VtoG;ENST00000441285:VtoG;                     | + | TtoG | 0.1    | 0.1    | 3  | 3  | [10,10]   |
| chr17:4799584   | ENO3    | coding_exon |                                                                                     | + | AtoG | 0.1    | 0.1    | 6  | 2  | [10,10]   |
| chr4:83601006   | ENOPH1  | UTR3        |                                                                                     | + | AtoG | 0.1053 | 0.1111 | 4  | 2  | [18,19]   |
| chr4:83601202   | ENOPH1  | UTR3        |                                                                                     | + | TtoA | 0.1818 | 0.3077 | 4  | 2  | [11,13]   |
| chr18:681070    | ENOSF1  | coding_exon | ENST00000251101:RtoT;ENST00000340116:RtoT;ENST00000383578:RtoT;                     | - | GtoC | 0.1    | 0.3333 | 9  | 7  | [10,24]   |
| chr18:675930    | ENOSF1  | coding_exon |                                                                                     | - | AtoG | 0.1    | 0.1818 | 3  | 2  | [11,20]   |
| chr18:696560    | ENOSF1  | mixed       |                                                                                     | - | TtoC | 0.1    | 0.1    | 4  | 3  | [10,10]   |
| chr18:663435    | ENOSF1  | UTR3        |                                                                                     | - | AtoT | 0.1    | 0.1364 | 6  | 2  | [20,22]   |
| chr18:663447    | ENOSF1  | UTR3        |                                                                                     | - | TtoA | 0.1364 | 0.9231 | 3  | 3  | [13,29]   |
| chr18:663494    | ENOSF1  | UTR3        |                                                                                     | - | AtoT | 0.1053 | 0.3889 | 14 | 9  | [11,29]   |
| chr18:663498    | ENOSF1  | UTR3        |                                                                                     | - | AtoG | 0.1    | 0.1818 | 3  | 2  | [10,11]   |
| chr6:46216008   | ENPP4   | coding_exon | ENST00000321037:Cto*;ENST00000371401:Cto*;                                          | + | TtoA | 0.1    | 0.1333 | 3  | 3  | [10,15]   |
| chr1:148861232  | ENSA    | mixed       |                                                                                     | - | CtoA | 0.1    | 0.2    | 5  | 2  | [10,10]   |
| chr1:148861234  | ENSA    | mixed       |                                                                                     | - | AtoG | 0.1    | 0.2308 | 7  | 3  | [10,20]   |
| chr20:25152764  | ENTPD6  | coding_exon | ENST00000354989:VtoA;ENST00000360031:VtoA;ENST00000376635:VtoA;ENST00000376635:VtoA | + | TtoC | 0.1    | 0.1053 | 3  | 2  | [10,19]   |
| chr22:39884418  | EP300   | coding_exon |                                                                                     | + | TtoC | 0.1    | 0.1818 | 3  | 2  | [10,11]   |
| chr12:131128095 | EP400   | coding_exon | ENST00000330386:PtoG;ENST00000332482:PtoQ;ENST00000333577:PtoQ;ENST00000333577:PtoQ | + | CtoA | 0.1    | 0.1    | 2  | 2  | [10,10]   |
| chr12:131088193 | EP400   | coding_exon | ENST00000330386:NtoD;ENST00000332482:NtoD;ENST00000333577:NtoD;ENST00000333577:NtoD | + | AtoG | 0.1333 | 0.1429 | 4  | 2  | [14,15]   |
| chr12:131128711 | EP400   | UTR3        |                                                                                     | + | AtoG | 0.1333 | 0.1429 | 5  | 2  | [14,15]   |
| chr12:131128764 | EP400   | UTR3        |                                                                                     | + | TtoC | 0.1    | 0.1    | 2  | 2  | [10,10]   |
| chr12:131129209 | EP400   | UTR3        |                                                                                     | + | TtoC | 0.1    | 0.2308 | 4  | 2  | [10,13]   |
| chr12:131129216 | EP400   | UTR3        |                                                                                     | + | AtoG | 0.1    | 0.1111 | 2  | 2  | [10,18]   |
| chr12:131130484 | EP400   | UTR3        |                                                                                     | + | GtoT | 0.1    | 0.1    | 2  | 2  | [10,10]   |
| chr12:131130608 | EP400   | UTR3        |                                                                                     | + | AtoG | 0.1    | 0.1    | 2  | 2  | [10,10]   |
| chr1:29316885   | EPB41   | UTR3        |                                                                                     | + | TtoC | 0.1429 | 0.1818 | 4  | 2  | [11,14]   |
| chr1:29317125   | EPB41   | UTR3        |                                                                                     | + | TtoA | 0.1111 | 0.1538 | 3  | 2  | [10,13]   |
| chr1:29319068   | EPB41   | UTR3        |                                                                                     | + | TtoC | 0.1    | 0.1333 | 2  | 2  | [10,15]   |
| chr1:29319099   | EPB41   | UTR3        |                                                                                     | + | TtoA | 0.1    | 0.1    | 4  | 2  | [10,20]   |
| chr6:131257859  | EPB41L2 | mixed       |                                                                                     | - | AtoG | 0.1    | 0.1429 | 4  | 2  | [10,14]   |
| chr6:131203249  | EPB41L2 | UTR3        |                                                                                     | - | TtoC | 0.1667 | 0.1905 | 5  | 2  | [12,21]   |
| chr6:131220964  | EPB41L2 | UTR3        |                                                                                     | - | GtoA | 0.15   | 0.1667 | 9  | 2  | [18,20]   |
| chr3:136355797  | EPHB1   | mixed       |                                                                                     | + | TtoC | 0.1    | 0.1    | 3  | 2  | [10,10]   |
| chr19:16358022  | EPS15L1 | coding_exon | ENST00000248070:StoR;ENST00000455140:StoR;                                          | - | TtoA | 0.1    | 0.1429 | 4  | 2  | [10,14]   |
| chr19:16333590  | EPS15L1 | coding_exon |                                                                                     | - | TtoG | 0.1154 | 0.1818 | 7  | 2  | [11,26]   |
| chr5:96136592   | ERAP1   | mixed       |                                                                                     | - | TtoA | 0.1538 | 0.3077 | 8  | 2  | [14,14]   |
| chr5:96137616   | ERAP1   | mixed       |                                                                                     | - | TtoC | 0.1    | 0.1429 | 4  | 2  | [11,14]   |
| chr5:96137621   | ERAP1   | mixed       |                                                                                     | - | TtoA | 0.1364 | 0.15   | 3  | 2  | [20,22]   |
| chr5:65410484   | ERBB2IP | UTR3        |                                                                                     | + | CtoA | 0.1176 | 0.1538 | 2  | 2  | [13,17]   |
| chr5:65411630   | ERBB2IP | UTR3        |                                                                                     | + | AtoG | 0.1    | 0.1818 | 3  | 2  | [10,11]   |
| chr2:127731424  | ERCC3   | UTR3        |                                                                                     | - | TtoC | 0.1538 | 0.2    | 7  | 2  | [10,13]   |
| chr13:102322576 | ERCC5   | coding_exon | ENST00000355739:NtoK;ENST00000375954:NtoK;                                          | + | TtoA | 0.1538 | 0.2    | 4  | 2  | [10,13]   |
| chr13:102312963 | ERCC5   | coding_exon | ENST00000355739:ItoK;                                                               | + | TtoA | 0.1    | 0.1053 | 6  | 2  | [19,20]   |
| chr5:60276526   | ERCC8   | coding_exon | ENST00000265038:StoT;ENST00000426118:StoT;ENST00000426742:VtoD;                     | - | TtoA | 0.1    | 0.1    | 2  | 2  | [10,10]   |
| chr19:47446381  | ERF     | coding_exon | ENST00000222329:WtoG;                                                               | - | TtoG | 0.1034 | 0.2353 | 4  | 3  | [17,29]   |
| chr5:172312129  | ERGIC1  | UTR3        |                                                                                     | + | GtoA | 0.1    | 0.2727 | 5  | 3  | [10,20]   |
| chr5:172312142  | ERGIC1  | UTR3        |                                                                                     | + | AtoC | 0.125  | 0.5882 | 4  | 2  | [16,17]   |
| chr5:172312277  | ERGIC1  | UTR3        |                                                                                     | + | GtoA | 0.1    | 0.1875 | 3  | 3  | [10,16]   |
| chr12:29401886  | ERGIC2  | coding_exon | ENST00000201023:HtoR;ENST00000360150:HtoR;                                          | - | AtoG | 0.1    | 0.2    | 3  | 3  | [10,16]   |
| chr12:29385001  | ERGIC2  | UTR3        |                                                                                     | - | GtoA | 0.1053 | 0.1667 | 3  | 2  | [12,19]   |
| chr20:33608786  | ERGIC3  | UTR3        |                                                                                     | + | AtoG | 0.1    | 0.1538 | 7  | 5  | [13,28]   |

|                 |         |             |                                                                                      |   |      |        |        |    |    |          |
|-----------------|---------|-------------|--------------------------------------------------------------------------------------|---|------|--------|--------|----|----|----------|
| chr14:68916620  | ERH     | UTR3        |                                                                                      | - | TtoG | 0.2766 | 0.381  | 7  | 4  | [22,50]  |
| chr10:101900472 | ERLIN1  | UTR3        |                                                                                      | - | Atoc | 0.1    | 0.1333 | 2  | 2  | [10,15]  |
| chr8:37714627   | ERLIN2  | coding_exon | ENST00000276461:VtoG;ENST00000335171:VtoG;ENST00000397228:VtoG;                      | + | TtoG | 0.1    | 0.2308 | 3  | 3  | [10,14]  |
| chr8:37721355   | ERLIN2  | coding_exon | ENST00000276461:VtoA;ENST00000335171:VtoA;ENST00000397228:VtoA;                      | + | TtoC | 0.1    | 0.125  | 3  | 2  | [10,17]  |
| chr9:5775667    | ERMP1   | UTR3        |                                                                                      | - | Atoc | 0.1    | 0.1    | 3  | 2  | [10,10]  |
| chr14:52176999  | ERO1L   | UTR3        |                                                                                      | - | TtoA | 0.1176 | 0.1304 | 4  | 2  | [17,23]  |
| chr1:234473346  | ERO1LB  | coding_exon | ENST00000354619:DtoE;                                                                | - | TtoA | 0.1    | 0.1    | 2  | 2  | [10,10]  |
| chr12:110935645 | ERP29   | UTR5        |                                                                                      | + | CtoT | 0.1    | 0.1379 | 3  | 2  | [20,29]  |
| chr13:46243489  | ESD     | UTR3        |                                                                                      | - | TtoC | 0.1034 | 0.1471 | 8  | 4  | [29,49]  |
| chr20:13643610  | ESF1    | coding_exon | ENST00000202816:StoP;                                                                | - | TtoC | 0.1    | 0.2    | 2  | 2  | [10,11]  |
| chr20:13704611  | ESF1    | coding_exon | ENST00000202816:DtoN;                                                                | - | GtoA | 0.1    | 0.1    | 2  | 2  | [10,10]  |
| chr20:13643656  | ESF1    | coding_exon |                                                                                      | - | Atog | 0.1    | 0.1176 | 5  | 3  | [10,18]  |
| chr20:13703893  | ESF1    | coding_exon |                                                                                      | - | TtoC | 0.1    | 0.1333 | 5  | 3  | [10,15]  |
| chr20:13711706  | ESF1    | coding_exon |                                                                                      | - | Atog | 0.1538 | 0.16   | 3  | 2  | [13,25]  |
| chr16:66819804  | ESRP2   | UTR3        |                                                                                      | - | Atot | 0.1    | 0.1053 | 4  | 2  | [10,19]  |
| chr11:63840777  | ESRRA   | UTR3        |                                                                                      | + | TtoC | 0.1373 | 0.2308 | 6  | 3  | [11,56]  |
| chr11:63840778  | ESRRA   | UTR3        |                                                                                      | + | Atog | 0.125  | 0.25   | 4  | 4  | [13,53]  |
| chr11:63840782  | ESRRA   | UTR3        |                                                                                      | + | Atog | 0.1084 | 0.1311 | 17 | 7  | [60,113] |
| chr12:54808705  | ESYT1   | coding_exon | ENST00000267113:Etog;ENST00000394048:Etog;ENST00000402331:Etog;                      | + | Atog | 0.1    | 0.1176 | 3  | 2  | [17,30]  |
| chr12:54810907  | ESYT1   | coding_exon |                                                                                      | + | TtoC | 0.1333 | 0.1429 | 4  | 2  | [15,28]  |
| chr7:158227150  | ESYT2   | coding_exon | ENST00000251527:Atog;ENST00000377650:Atog;ENST00000421679:Atog;ENST00000421679:Atog; | - | GtoT | 0.1    | 0.1    | 2  | 2  | [11,20]  |
| chr7:158284490  | ESYT2   | mixed       |                                                                                      | - | TtoA | 0.1    | 0.1333 | 2  | 2  | [10,15]  |
| chr2:67484243   | ETAA1   | coding_exon | ENST00000272342:StoG;                                                                | + | Atog | 0.1    | 0.1    | 2  | 2  | [10,10]  |
| chr19:56540240  | ETFB    | UTR3        |                                                                                      | - | CtoG | 0.1818 | 0.2    | 2  | 2  | [10,11]  |
| chr19:56540242  | ETFB    | UTR3        |                                                                                      | - | Atog | 0.1    | 0.2727 | 8  | 3  | [10,16]  |
| chr19:56540244  | ETFB    | UTR3        |                                                                                      | - | TtoC | 0.125  | 0.1818 | 5  | 4  | [11,20]  |
| chr19:48702734  | ETHE1   | UTR3        |                                                                                      | - | TtoA | 0.1143 | 0.1667 | 4  | 3  | [13,35]  |
| chr19:48702738  | ETHE1   | UTR3        |                                                                                      | - | TtoC | 0.1111 | 0.1364 | 9  | 5  | [15,27]  |
| chr11:127834002 | ETS1    | UTR3        |                                                                                      | - | Atog | 0.1    | 0.1333 | 5  | 2  | [15,20]  |
| chr11:127834547 | ETS1    | UTR3        |                                                                                      | - | TtoG | 0.1042 | 0.2105 | 8  | 4  | [38,50]  |
| chr12:11928688  | ETV6    | coding_exon | ENST00000266427:DtoA;                                                                | + | Atoc | 0.125  | 0.1667 | 4  | 2  | [12,16]  |
| chr12:11937383  | ETV6    | UTR3        |                                                                                      | + | Atog | 0.1429 | 0.1538 | 2  | 2  | [13,14]  |
| chr12:11938595  | ETV6    | UTR3        |                                                                                      | + | TtoC | 0.1    | 0.1176 | 6  | 2  | [10,17]  |
| chr12:11939463  | ETV6    | UTR3        |                                                                                      | + | Atog | 0.1    | 0.1    | 4  | 2  | [10,10]  |
| chr17:26669827  | EV12A   | coding_exon | ENST00000247270:Etog*;ENST00000394756:Etog*;                                         | - | GtoT | 0.1    | 0.125  | 2  | 2  | [10,16]  |
| chr14:99680321  | EVL     | UTR3        |                                                                                      | + | TtoC | 0.1    | 0.2121 | 8  | 3  | [20,70]  |
| chr1:240101957  | EXO1    | coding_exon | ENST00000348581:Atog;ENST00000366548:Atog;ENST00000445862:Atog;                      | + | CtoA | 0.1111 | 0.1818 | 5  | 4  | [10,18]  |
| chr1:240101958  | EXO1    | coding_exon |                                                                                      | + | Atog | 0.1    | 0.2    | 5  | 4  | [10,19]  |
| chr4:56465271   | EXOC1   | coding_exon |                                                                                      | + | GtoT | 0.1    | 0.1    | 4  | 2  | [10,10]  |
| chr5:512570     | EXOC3   | mixed       |                                                                                      | + | Atoc | 0.1176 | 0.1538 | 7  | 3  | [13,17]  |
| chr5:512571     | EXOC3   | mixed       |                                                                                      | + | GtoT | 0.1111 | 0.1667 | 7  | 3  | [12,18]  |
| chr5:520388     | EXOC3   | mixed       |                                                                                      | + | TtoC | 0.2    | 0.2632 | 2  | 2  | [10,19]  |
| chr7:132624217  | EXOC4   | coding_exon | ENST00000253861:VtoE;ENST00000393161:VtoE;                                           | + | TtoA | 0.1    | 0.1818 | 3  | 2  | [10,11]  |
| chr7:132610446  | EXOC4   | coding_exon | ENST00000253861:StoP;ENST00000393161:StoP;                                           | + | TtoC | 0.1    | 0.1538 | 4  | 3  | [10,13]  |
| chr7:132610437  | EXOC4   | coding_exon | ENST00000253861:Itov;ENST00000393161:Itov;                                           | + | Atog | 0.1    | 0.125  | 2  | 2  | [10,16]  |
| chr7:132610451  | EXOC4   | coding_exon |                                                                                      | + | Atoc | 0.1    | 0.1    | 4  | 2  | [10,10]  |
| chr7:132652638  | EXOC4   | coding_exon |                                                                                      | + | Atog | 0.1111 | 0.125  | 3  | 2  | [16,18]  |
| chr7:133399893  | EXOC4   | UTR3        |                                                                                      | + | TtoA | 0.1176 | 0.1333 | 5  | 2  | [15,17]  |
| chr1:11050694   | EXOSC10 | coding_exon | ENST00000304457:VtoA;ENST00000376936:VtoA;                                           | - | TtoC | 0.1053 | 0.2    | 7  | 2  | [15,19]  |
| chr9:3770561    | EXOSC3  | UTR3        |                                                                                      | - | TtoC | 0.1    | 0.25   | 4  | 3  | [10,16]  |
| chr16:68843118  | EXOSC6  | coding_exon | ENST00000435634:VtoL;                                                                | - | GtoC | 1      | 1      | 3  | 3  | [19,31]  |
| chr16:68842242  | EXOSC6  | UTR3        |                                                                                      | - | Atot | 0.1667 | 0.25   | 6  | 3  | [12,24]  |
| chr16:68842243  | EXOSC6  | UTR3        |                                                                                      | - | Atot | 0.125  | 0.2941 | 9  | 2  | [17,24]  |
| chr16:68842297  | EXOSC6  | UTR3        |                                                                                      | - | Atog | 0.1    | 0.7174 | 12 | 11 | [10,71]  |
| chr16:68842300  | EXOSC6  | UTR3        |                                                                                      | - | Atog | 0.1034 | 0.7105 | 11 | 8  | [16,61]  |
| chr16:68842315  | EXOSC6  | UTR3        |                                                                                      | - | GtoA | 0.1125 | 0.5    | 9  | 7  | [28,83]  |
| chr16:68842350  | EXOSC6  | UTR3        |                                                                                      | - | CtoA | 0.1364 | 0.6818 | 9  | 9  | [42,80]  |
| chr16:68842379  | EXOSC6  | UTR3        |                                                                                      | - | GtoT | 0.1111 | 0.3214 | 8  | 2  | [10,28]  |
| chr4:122957504  | EXOSC9  | UTR3        |                                                                                      | + | TtoA | 0.1    | 0.1429 | 2  | 2  | [10,14]  |
| chr4:122957623  | EXOSC9  | UTR3        |                                                                                      | + | Atog | 0.2353 | 0.25   | 4  | 2  | [16,17]  |
| chr11:44214461  | EXT2    | coding_exon | ENST00000343631:Itov;ENST00000358681:Itov;                                           | + | Atog | 0.1    | 0.1333 | 2  | 2  | [10,15]  |
| chr11:44212273  | EXT2    | coding_exon |                                                                                      | + | TtoC | 0.1    | 0.2    | 2  | 2  | [10,10]  |
| chr11:44222536  | EXT2    | UTR3        |                                                                                      | + | Atog | 0.1    | 0.1538 | 2  | 2  | [10,13]  |
| chr1:28203513   | EYA3    | coding_exon | ENST00000373863:VtoA;ENST00000373864:VtoA;ENST00000373871:VtoA;                      | - | TtoC | 0.1111 | 0.1176 | 3  | 2  | [10,17]  |
| chr1:28199088   | EYA3    | coding_exon |                                                                                      | - | TtoG | 0.1    | 0.1667 | 2  | 2  | [10,12]  |
| chr1:28170309   | EYA3    | UTR3        |                                                                                      | - | TtoG | 0.1    | 0.1304 | 3  | 2  | [20,23]  |
| chr1:28171360   | EYA3    | UTR3        |                                                                                      | - | GtoT | 0.1    | 0.1538 | 2  | 2  | [10,13]  |
| chr17:38106886  | EZH1    | UTR3        |                                                                                      | - | TtoC | 0.1    | 0.1    | 3  | 2  | [10,10]  |
| chr17:38107711  | EZH1    | UTR3        |                                                                                      | - | TtoC | 0.1    | 0.1667 | 3  | 2  | [10,12]  |
| chr17:38107897  | EZH1    | UTR3        |                                                                                      | - | GtoT | 0.1    | 0.125  | 2  | 2  | [10,16]  |
| chr7:148135649  | EZH2    | UTR3        |                                                                                      | - | TtoC | 0.1176 | 0.1667 | 3  | 2  | [12,17]  |
| chr7:148135656  | EZH2    | UTR3        |                                                                                      | - | TtoC | 0.1739 | 0.5    | 7  | 6  | [12,36]  |
| chr1:159233356  | F11R    | UTR3        |                                                                                      | - | Atog | 0.1    | 0.1667 | 8  | 3  | [12,21]  |
| chr1:159233360  | F11R    | UTR3        |                                                                                      | - | Atog | 0.15   | 0.1667 | 3  | 2  | [12,20]  |
| chr1:159234396  | F11R    | UTR3        |                                                                                      | - | TtoG | 0.1    | 0.1    | 3  | 2  | [10,11]  |
| chr6:6196046    | F13A1   | mixed       |                                                                                      | - | TtoG | 0.1    | 0.1    | 3  | 2  | [10,10]  |
| chr6:6211828    | F13A1   | mixed       |                                                                                      | - | Atog | 0.1    | 0.1    | 2  | 2  | [10,10]  |
| chr1:31618424   | FABP3   | coding_exon | ENST00000373713:WtoR;                                                                | - | TtoA | 0.1    | 0.1    | 2  | 2  | [10,10]  |
| chr8:82358198   | FABP5   | coding_exon | ENST00000297258:PtoR;ENST00000396359:PtoR;                                           | + | CtoG | 0.1    | 0.1538 | 2  | 2  | [10,13]  |
| chr8:82358158   | FABP5   | mixed       |                                                                                      | + | GtoT | 0.1    | 0.2    | 4  | 2  | [10,10]  |
| chr8:82358165   | FABP5   | mixed       |                                                                                      | + | TtoA | 0.1818 | 0.3333 | 2  | 2  | [10,11]  |
| chr11:61323721  | FADS1   | UTR3        |                                                                                      | - | TtoG | 0.1    | 0.1    | 2  | 2  | [10,10]  |
| chr11:61323722  | FADS1   | UTR3        |                                                                                      | - | TtoA | 0.1    | 0.1667 | 5  | 2  | [10,12]  |
| chr11:61324581  | FADS1   | UTR3        |                                                                                      | - | Atoc | 0.1    | 0.1379 | 7  | 2  | [20,29]  |
| chr5:175868000  | FAF2    | UTR3        |                                                                                      | + | GtoA | 0.25   | 0.3333 | 3  | 2  | [12,28]  |
| chr5:175868614  | FAF2    | UTR3        |                                                                                      | + | Atot | 0.1    | 0.1176 | 5  | 2  | [10,17]  |
| chr15:78256956  | FAH     | coding_exon |                                                                                      | + | TtoG | 0.1    | 0.1429 | 4  | 2  | [14,20]  |
| chr16:4599962   | FAM100A | coding_exon |                                                                                      | - | TtoA | 0.1    | 0.1538 | 3  | 3  | [10,20]  |
| chr16:4599153   | FAM100A | UTR3        |                                                                                      | - | TtoC | 0.1111 | 0.2    | 6  | 2  | [10,18]  |
| chr1:108982788  | FAM102B | mixed       |                                                                                      | + | Atog | 0.1    | 0.125  | 2  | 2  | [10,16]  |
| chr17:68715686  | FAM104A | UTR3        |                                                                                      | - | Atog | 0.1    | 0.1818 | 2  | 2  | [10,11]  |
| chr17:68715898  | FAM104A | UTR3        |                                                                                      | - | TtoG | 0.1    | 0.1    | 3  | 2  | [10,10]  |
| chr5:14726774   | FAM105B | coding_exon | ENST00000284274:Atog;                                                                | + | CtoA | 0.1    | 0.1    | 4  | 2  | [10,20]  |
| chr5:14751542   | FAM105B | UTR3        |                                                                                      | + | TtoC | 0.1    | 0.1176 | 3  | 2  | [10,17]  |
| chr10:14612490  | FAM107B | mixed       |                                                                                      | - | Atoc | 0.1    | 0.125  | 3  | 2  | [16,20]  |
| chr10:14602487  | FAM107B | UTR3        |                                                                                      | - | TtoC | 0.122  | 0.1429 | 3  | 3  | [15,41]  |



|                 |           |             |                                                                                     |   |      |        |        |    |   |          |
|-----------------|-----------|-------------|-------------------------------------------------------------------------------------|---|------|--------|--------|----|---|----------|
| chr11:58676405  | FAM111A   | coding_exon | ENST00000361723:RtoG;ENST00000420244:RtoG;ENST00000423534:RtoG;ENST00000423534:RtoG | + | AtaG | 0.1    | 0.1053 | 4  | 2 | [10,19]  |
| chr11:58650013  | FAM111B   | coding_exon | ENST00000343597:MtoL;ENST00000435727:MtoL;                                          | + | AtaC | 0.1    | 0.1    | 2  | 2 | [10,10]  |
| chr11:58650185  | FAM111B   | coding_exon | ENST00000343597:LtoR;ENST00000435727:LtoR;                                          | + | TtoG | 0.1    | 0.2    | 3  | 2 | [10,10]  |
| chr20:2764768   | FAM113A   | coding_exon | ENST00000356872:PtoL;ENST00000360652:PtoL;ENST00000436952:PtoL;                     | - | CtoT | 0.1    | 0.1667 | 3  | 2 | [12,20]  |
| chr22:44102950  | FAM118A   | coding_exon | ENST00000405673:AtaG;ENST00000442334:AtaG;                                          | + | CtoG | 0.3333 | 0.3333 | 2  | 2 | [15,15]  |
| chr22:44105152  | FAM118A   | coding_exon | ENST00000216214:LtoP;ENST00000405548:LtoP;ENST00000441876:LtoP;                     | + | TtoC | 0.1    | 0.1538 | 4  | 2 | [10,13]  |
| chr22:44102584  | FAM118A   | coding_exon |                                                                                     | + | CtoT | 0.1594 | 0.6667 | 5  | 4 | [12,69]  |
| chr11:125637480 | FAM118B   | UTR3        |                                                                                     | + | TtoC | 0.1176 | 0.1429 | 2  | 2 | [14,17]  |
| chr2:208186404  | FAM119A   | coding_exon | ENST00000272839:VtoL;ENST00000406927:VtoL;ENST00000411432:VtoL;ENST00000411432:VtoL | - | GtoT | 0.1    | 0.1667 | 2  | 2 | [10,12]  |
| chr2:208186106  | FAM119A   | mixed       |                                                                                     | - | GtoT | 0.1    | 0.1    | 2  | 2 | [10,10]  |
| chr9:95248963   | FAM120AOS | UTR3        |                                                                                     | - | TtoC | 0.1    | 0.1053 | 4  | 2 | [10,19]  |
| chr9:95249325   | FAM120AOS | UTR3        |                                                                                     | - | GtoA | 0.1    | 0.1053 | 3  | 2 | [10,19]  |
| chr6:170469404  | FAM120B   | coding_exon | ENST00000476287:DtoA;                                                               | + | AtaC | 0.1    | 0.1333 | 4  | 3 | [10,15]  |
| chr6:170555810  | FAM120B   | UTR3        |                                                                                     | + | CtoG | 0.3939 | 0.4545 | 2  | 2 | [22,33]  |
| chr19:17394210  | FAM125A   | coding_exon | ENST00000317040:VtoG;ENST00000392702:VtoG;                                          | + | TtoG | 0.1    | 0.1333 | 5  | 2 | [10,15]  |
| chr7:22966412   | FAM126A   | coding_exon | ENST00000409923:WtoR;ENST00000432176:WtoR;                                          | - | TtoC | 0.1    | 0.1    | 2  | 2 | [10,20]  |
| chr1:183026817  | FAM129A   | UTR3        |                                                                                     | - | TtoA | 0.125  | 0.2222 | 4  | 3 | [10,17]  |
| chr1:183029934  | FAM129A   | UTR3        |                                                                                     | - | TtoC | 0.1064 | 0.1333 | 4  | 2 | [16,47]  |
| chr1:183030113  | FAM129A   | UTR3        |                                                                                     | - | TtoG | 0.1    | 0.1    | 2  | 2 | [10,10]  |
| chr1:183030682  | FAM129A   | UTR3        |                                                                                     | - | GtoT | 0.1    | 0.1    | 2  | 2 | [10,10]  |
| chr7:92044427   | FAM133B   | coding_exon | ENST00000427372:RtoW;ENST00000438306:RtoW;ENST00000445716:RtoW;                     | - | CtoT | 0.1176 | 0.2951 | 5  | 4 | [17,61]  |
| chr7:92033307   | FAM133B   | coding_exon | ENST00000427372:RtoQ;ENST00000438306:RtoQ;ENST00000445716:RtoQ;                     | - | GtoA | 0.1765 | 0.3333 | 5  | 2 | [12,18]  |
| chr7:92044426   | FAM133B   | coding_exon | ENST00000427372:RtoQ;ENST00000438306:RtoQ;ENST00000445716:RtoQ;                     | - | GtoA | 0.1429 | 0.1778 | 4  | 3 | [21,45]  |
| chr7:92048668   | FAM133B   | coding_exon | ENST00000427372:PtoQ;ENST00000438306:PtoQ;ENST00000445716:PtoQ;                     | - | CtoA | 0.1    | 0.3    | 2  | 2 | [10,10]  |
| chr7:92046617   | FAM133B   | coding_exon | ENST00000427372:KtoE;ENST00000438306:KtoE;ENST00000445716:KtoE;                     | - | AtaG | 0.1    | 0.2    | 2  | 2 | [10,10]  |
| chr7:92037165   | FAM133B   | coding_exon | ENST00000427372:DtoH;ENST00000438306:DtoH;ENST00000445716:DtoH;                     | - | GtoC | 0.1    | 0.5476 | 4  | 4 | [10,42]  |
| chr7:92057587   | FAM133B   | UTR5        |                                                                                     | - | CtoT | 0.1818 | 0.25   | 4  | 2 | [11,20]  |
| chr17:37987169  | FAM134C   | UTR3        |                                                                                     | - | AtaG | 0.1111 | 0.1667 | 5  | 3 | [18,27]  |
| chr5:137301709  | FAM13B    | UTR3        |                                                                                     | - | TtoC | 0.1    | 0.1818 | 3  | 2 | [10,11]  |
| chr14:23679940  | FAM158A   | coding_exon | ENST00000216799:QtoH;ENST00000396903:QtoH;ENST00000439499:QtoH;                     | - | GtoC | 0.1    | 0.1702 | 9  | 6 | [10,47]  |
| chr11:6192219   | FAM160A2  | mixed       |                                                                                     | - | TtoC | 0.1    | 0.1    | 3  | 2 | [10,10]  |
| chr11:6189233   | FAM160A2  | UTR3        |                                                                                     | - | AtaG | 0.1    | 0.1667 | 2  | 2 | [10,12]  |
| chr10:116592771 | FAM160B1  | coding_exon |                                                                                     | + | AtaT | 0.1    | 0.1    | 4  | 2 | [10,10]  |
| chr10:116613565 | FAM160B1  | mixed       |                                                                                     | + | TtoG | 0.1    | 0.1    | 4  | 2 | [10,10]  |
| chr9:139257961  | FAM166A   | UTR3        |                                                                                     | - | TtoC | 0.1667 | 0.3333 | 6  | 4 | [18,40]  |
| chr2:131524090  | FAM168B   | mixed       |                                                                                     | - | TtoA | 0.1    | 0.125  | 4  | 2 | [10,16]  |
| chr2:131525736  | FAM168B   | mixed       |                                                                                     | - | TtoC | 0.1    | 0.2105 | 6  | 5 | [10,20]  |
| chr2:131522176  | FAM168B   | UTR3        |                                                                                     | - | CtoT | 0.1    | 0.1    | 4  | 2 | [20,20]  |
| chr1:177310027  | FAM20B    | UTR3        |                                                                                     | + | AtaG | 0.1    | 0.125  | 3  | 2 | [10,16]  |
| chr1:243072132  | FAM36A    | coding_exon | ENST00000366528:RtoK;ENST00000411948:RtoK;                                          | + | GtoA | 0.1011 | 0.125  | 3  | 2 | [72,89]  |
| chr1:243071920  | FAM36A    | coding_exon | ENST00000366528:HtoD;ENST00000411948:HtoD;                                          | + | CtoG | 0.1064 | 0.2131 | 15 | 7 | [29,75]  |
| chr1:243071913  | FAM36A    | coding_exon |                                                                                     | + | CtoT | 0.1143 | 0.1304 | 8  | 2 | [23,35]  |
| chr1:243072157  | FAM36A    | coding_exon |                                                                                     | + | GtoA | 0.1029 | 0.25   | 15 | 7 | [27,87]  |
| chr1:243073115  | FAM36A    | UTR3        |                                                                                     | + | TtoA | 0.1071 | 0.1591 | 3  | 2 | [28,44]  |
| chr16:87327235  | FAM38A    | coding_exon |                                                                                     | - | CtoT | 0.1    | 0.1053 | 2  | 2 | [10,19]  |
| chr1:110397953  | FAM40A    | coding_exon | ENST00000369795:GtoS;ENST00000369796:GtoS;                                          | + | GtoA | 0.1053 | 0.1429 | 3  | 2 | [14,19]  |
| chr1:110398484  | FAM40A    | UTR3        |                                                                                     | + | GtoA | 0.1    | 0.1176 | 3  | 2 | [10,17]  |
| chr10:120869939 | FAM45B    | coding_exon | ENST00000361432:VtoA;                                                               | + | TtoC | 0.1    | 0.1    | 2  | 2 | [10,10]  |
| chr13:36494212  | FAM48A    | coding_exon | ENST00000350612:TtoS;ENST00000356185:TtoS;ENST00000360252:TtoS;ENST00000360252:TtoS | - | AtaT | 0.1    | 0.1333 | 5  | 3 | [10,15]  |
| chr13:36496172  | FAM48A    | coding_exon | ENST00000350612:RtoG;ENST00000356185:RtoG;ENST00000360252:RtoG;ENST00000360252:RtoG | - | AtaG | 0.1538 | 0.1667 | 5  | 2 | [13,13]  |
| chr10:126298073 | FAM53B    | UTR3        |                                                                                     | - | TtoG | 0.1    | 0.1667 | 5  | 2 | [12,31]  |
| chr10:126300458 | FAM53B    | UTR3        |                                                                                     | - | TtoC | 0.1    | 0.2    | 3  | 2 | [10,10]  |
| chr5:137712560  | FAM53C    | UTR3        |                                                                                     | + | TtoG | 0.1429 | 0.1579 | 4  | 2 | [15,19]  |
| chr5:137712798  | FAM53C    | UTR3        |                                                                                     | + | TtoG | 0.1    | 0.1    | 2  | 2 | [10,10]  |
| chr5:137712895  | FAM53C    | UTR3        |                                                                                     | + | TtoC | 0.1    | 0.2    | 10 | 4 | [10,30]  |
| chr3:102987138  | FAM55C    | coding_exon | ENST00000273347:TtoI;ENST00000422132:TtoI;ENST00000477909:TtoI;ENST00000477909:TtoI | + | CtoT | 0.1    | 0.1    | 2  | 2 | [10,10]  |
| chr1:149236292  | FAM63A    | UTR3        |                                                                                     | - | AtaG | 0.1    | 0.1    | 2  | 2 | [10,11]  |
| chr17:6294876   | FAM64A    | UTR3        |                                                                                     | + | GtoT | 0.1579 | 0.2    | 4  | 2 | [10,19]  |
| chr6:24977317   | FAM65B    | coding_exon | ENST00000259698:Etog;ENST00000378023:Etog;                                          | - | AtaG | 0.1    | 0.1    | 2  | 2 | [10,10]  |
| chr9:130851959  | FAM73B    | coding_exon | ENST00000277475:WtoR;ENST00000358369:WtoR;ENST00000406926:WtoR;ENST00000406926:WtoR | + | TtoC | 0.1    | 0.1    | 2  | 2 | [10,10]  |
| chr9:130850587  | FAM73B    | coding_exon | ENST00000277475:Itos;ENST00000358369:Itos;ENST00000406926:Itos;ENST00000406926:Itos | + | TtoG | 0.1    | 0.1    | 2  | 2 | [10,10]  |
| chr9:133125393  | FAM78A    | UTR3        |                                                                                     | - | TtoG | 0.1    | 0.1    | 2  | 2 | [10,10]  |
| chr9:133125819  | FAM78A    | UTR3        |                                                                                     | - | AtaG | 0.1    | 0.1429 | 2  | 2 | [10,14]  |
| chr15:57586830  | FAM81A    | coding_exon |                                                                                     | + | AtaG | 0.1    | 0.1    | 2  | 2 | [10,10]  |
| chr15:38817490  | FAM82A2   | coding_exon | ENST00000260385:MtoV;ENST00000338376:MtoV;ENST00000397465:MtoV;ENST00000397465:MtoV | - | AtaG | 0.1    | 0.1    | 3  | 2 | [10,10]  |
| chr15:38817134  | FAM82A2   | coding_exon | ENST00000260385:LtoP;ENST00000338376:LtoP;ENST00000397465:StoP;ENST00000397465:StoP | - | TtoC | 0.1429 | 0.1667 | 4  | 2 | [12,14]  |
| chr8:124880965  | FAM91A1   | coding_exon | ENST00000334705:VtoI;                                                               | + | GtoA | 0.1    | 0.1    | 2  | 2 | [10,10]  |
| chr8:124881001  | FAM91A1   | coding_exon | ENST00000334705:VtoI;                                                               | + | GtoA | 0.1    | 0.1818 | 2  | 2 | [10,11]  |
| chr8:124880987  | FAM91A1   | coding_exon | ENST00000334705:LtoR;                                                               | + | TtoG | 0.1    | 0.2    | 3  | 2 | [10,10]  |
| chr16:65523521  | FAM96B    | UTR3        |                                                                                     | - | TtoC | 0.125  | 0.125  | 8  | 2 | [16,41]  |
| chr2:33662258   | FAM98A    | UTR3        |                                                                                     | - | TtoC | 0.1053 | 0.1333 | 6  | 3 | [15,19]  |
| chr15:36564285  | FAM98B    | UTR3        |                                                                                     | + | TtoA | 0.1    | 0.1333 | 3  | 2 | [10,15]  |
| chr19:43585949  | FAM98C    | coding_exon | ENST00000252530:VtoG;ENST00000343358:VtoG;                                          | + | TtoG | 0.1    | 0.1538 | 2  | 2 | [10,13]  |
| chr16:88404654  | FANCA     | coding_exon | ENST00000389301:StoP;                                                               | - | TtoC | 0.1    | 0.1    | 4  | 2 | [10,20]  |
| chr16:88358799  | FANCA     | coding_exon | ENST00000389301:HtoQ;                                                               | - | CtoG | 0.1    | 0.3    | 5  | 2 | [10,10]  |
| chr3:10113062   | FANCD2    | mixed       |                                                                                     | + | TtoC | 0.1364 | 0.2    | 5  | 3 | [14,22]  |
| chr11:22603158  | FANCF     | mixed       |                                                                                     | - | CtoT | 0.1    | 0.1304 | 3  | 2 | [10,23]  |
| chr9:35066799   | FANCG     | coding_exon |                                                                                     | - | AtaG | 0.1    | 0.1    | 2  | 2 | [10,10]  |
| chr15:87617651  | FANCI     | coding_exon | ENST00000300027:FtoI;ENST00000310775:FtoI;ENST00000447611:FtoI;                     | + | TtoA | 0.125  | 0.1818 | 4  | 2 | [11,16]  |
| chr15:87660939  | FANCI     | UTR3        |                                                                                     | + | AtaC | 0.1333 | 0.9    | 3  | 2 | [10,30]  |
| chr15:87660940  | FANCI     | UTR3        |                                                                                     | + | CtoA | 0.125  | 0.6364 | 3  | 2 | [11,32]  |
| chr15:87661213  | FANCI     | UTR3        |                                                                                     | + | TtoC | 0.1111 | 0.2222 | 3  | 2 | [10,28]  |
| chr2:58284831   | FANCL     | coding_exon | ENST00000233741:KtoE;ENST00000402135:KtoE;ENST00000403295:KtoE;ENST00000403295:KtoE | - | AtaG | 0.1    | 0.1    | 2  | 2 | [10,10]  |
| chr12:29377913  | FAR2      | coding_exon |                                                                                     | + | TtoC | 0.1    | 0.1    | 2  | 2 | [10,10]  |
| chr6:5314398    | FARS2     | coding_exon | ENST00000274680:LtoR;ENST00000324331:LtoR;ENST00000397563:LtoR;                     | + | TtoG | 0.1    | 0.1818 | 5  | 2 | [10,11]  |
| chr6:5314396    | FARS2     | coding_exon |                                                                                     | + | GtoT | 0.1    | 0.1    | 4  | 2 | [10,10]  |
| chr2:223212621  | FAR5B     | coding_exon | ENST00000281828:LtoP;                                                               | - | TtoC | 0.1034 | 0.125  | 4  | 2 | [16,29]  |
| chr2:223144830  | FAR5B     | UTR3        |                                                                                     | - | TtoC | 0.4466 | 0.6078 | 2  | 2 | [51,103] |
| chr2:170096123  | FASTK01   | coding_exon | ENST00000260971:PtoR;ENST00000361619:PtoR;ENST00000415956:PtoR;ENST00000415956:PtoR | - | CtoG | 0.1333 | 0.1333 | 7  | 2 | [15,15]  |
| chr2:170094595  | FASTK01   | coding_exon | ENST00000260971:KtoE;ENST00000361619:KtoE;ENST00000415956:KtoE;ENST00000415956:KtoE | - | AtaG | 0.1    | 0.2143 | 3  | 2 | [10,14]  |
| chr2:207359779  | FASTKD2   | coding_exon | ENST00000236980:VtoE;ENST00000402774:VtoE;ENST00000403094:VtoE;                     | + | GtoA | 0.1    | 0.1818 | 6  | 2 | [10,11]  |
| chr2:207339691  | FASTKD2   | coding_exon | ENST00000236980:StoT;ENST00000402774:StoT;ENST00000403094:StoT;                     | + | GtoC | 0.2727 | 0.3333 | 2  | 2 | [11,12]  |
| chr11:64645073  | FAU       | coding_exon | ENST00000279259:GtoS;                                                               | - | GtoA | 0.1071 | 0.4444 | 10 | 8 | [18,56]  |
| chr11:64645072  | FAU       | coding_exon | ENST00000279259:GtoD;                                                               | - | GtoA | 0.1    | 0.3182 | 3  | 2 | [10,22]  |
| chr11:64645678  | FAU       | coding_exon |                                                                                     | - | AtaT | 0.1071 | 0.1282 | 7  | 2 | [31,43]  |
| chr11:64644680  | FAU       | UTR3        |                                                                                     | - | TtoC | 0.1905 | 0.5    | 8  | 7 | [10,29]  |

|                 |          |             |                                                                                      |   |      |        |        |    |   |         |
|-----------------|----------|-------------|--------------------------------------------------------------------------------------|---|------|--------|--------|----|---|---------|
| chr15:46489609  | FBN1     | UTR3        |                                                                                      | - | AtoG | 0.1    | 0.1    | 3  | 2 | [10,20] |
| chr12:131670635 | FBRSL1   | UTR3        |                                                                                      | + | GtoA | 0.1    | 0.1    | 7  | 2 | [10,30] |
| chr19:9783341   | FBXL12   | coding_exon | ENST00000247977:LtoR;                                                                | - | TtoG | 0.1333 | 0.1667 | 2  | 2 | [12,15] |
| chr16:30867377  | FBXL19   | UTR3        |                                                                                      | + | TtoC | 0.1    | 0.1538 | 2  | 2 | [10,13] |
| chr13:76473312  | FBXL3    | mixed       |                                                                                      | - | AtoT | 0.1    | 0.1    | 2  | 2 | [10,10] |
| chr4:15247332   | FBXL5    | coding_exon | ENST00000341285:FtoL;ENST00000382358:FtoL;ENST00000412094:FtoL;ENST00000412094:FtoL; | - | TtoC | 0.1    | 0.1    | 3  | 2 | [10,10] |
| chr4:15215939   | FBXL5    | UTR3        |                                                                                      | - | AtoG | 0.1    | 0.125  | 2  | 2 | [10,16] |
| chr4:15216340   | FBXL5    | UTR3        |                                                                                      | - | TtoC | 0.1    | 0.1818 | 2  | 2 | [10,11] |
| chr16:65754252  | FBXL8    | coding_exon | ENST00000258200:StoR;                                                                | + | TtoG | 0.1    | 0.1765 | 3  | 2 | [10,17] |
| chr16:65754255  | FBXL8    | coding_exon | ENST00000258200:Cto*;                                                                | + | CtoA | 0.1    | 0.15   | 4  | 2 | [10,20] |
| chr9:37502716   | FBXO10   | coding_exon | ENST00000276960:StoC;ENST00000432825:StoC;                                           | - | CtoG | 0.1053 | 0.1429 | 3  | 2 | [14,19] |
| chr9:37522055   | FBXO10   | coding_exon | ENST00000276960:StoC;ENST00000432825:StoC;                                           | - | AtoG | 0.1    | 0.1333 | 3  | 2 | [10,15] |
| chr9:37501389   | FBXO10   | UTR3        |                                                                                      | - | TtoG | 0.1    | 0.1538 | 3  | 2 | [10,13] |
| chr2:47881317   | FBXO11   | coding_exon |                                                                                      | - | AtoT | 0.1    | 0.1818 | 2  | 2 | [10,11] |
| chr2:47886872   | FBXO11   | coding_exon |                                                                                      | - | CtoT | 0.1111 | 0.119  | 4  | 2 | [18,43] |
| chr2:47913083   | FBXO11   | mixed       |                                                                                      | - | TtoG | 0.1    | 0.1667 | 2  | 2 | [10,12] |
| chr2:47920138   | FBXO11   | mixed       |                                                                                      | - | CtoG | 0.1    | 0.125  | 2  | 2 | [11,16] |
| chr2:47920306   | FBXO11   | mixed       |                                                                                      | - | TtoC | 0.125  | 0.1538 | 3  | 2 | [13,16] |
| chr19:44113451  | FBXO17   | coding_exon |                                                                                      | - | GtoA | 0.1    | 0.1111 | 2  | 2 | [10,18] |
| chr10:6007450   | FBXO18   | coding_exon | ENST00000379999:HtoR;ENST00000397269:HtoR;                                           | + | AtoG | 0.1154 | 0.1364 | 4  | 2 | [23,26] |
| chr12:116066931 | FBXO21   | UTR3        |                                                                                      | - | TtoC | 0.1    | 0.1    | 2  | 2 | [10,10] |
| chr14:38970662  | FBXO33   | coding_exon |                                                                                      | - | TtoG | 0.1    | 0.1    | 3  | 2 | [10,10] |
| chr14:54887796  | FBXO34   | mixed       |                                                                                      | + | TtoC | 0.1    | 0.1    | 2  | 2 | [10,10] |
| chr14:54888594  | FBXO34   | mixed       |                                                                                      | + | TtoC | 0.1    | 0.1    | 2  | 2 | [10,10] |
| chr14:54889489  | FBXO34   | mixed       |                                                                                      | + | GtoA | 0.1176 | 0.1538 | 3  | 2 | [13,17] |
| chr14:54889491  | FBXO34   | mixed       |                                                                                      | + | AtoC | 0.1176 | 0.1538 | 3  | 2 | [13,17] |
| chr5:147787487  | FBXO38   | coding_exon | ENST00000340253:StoP;                                                                | + | TtoC | 0.1    | 0.1818 | 3  | 2 | [10,11] |
| chr5:147799493  | FBXO38   | coding_exon | ENST00000296701:VtoL;ENST00000340253:VtoL;ENST00000394370:VtoL;                      | + | GtoC | 0.1    | 0.1333 | 4  | 3 | [10,18] |
| chr5:147787492  | FBXO38   | coding_exon |                                                                                      | + | CtoG | 0.1    | 0.1    | 2  | 2 | [10,10] |
| chr5:147801846  | FBXO38   | coding_exon |                                                                                      | + | AtoG | 0.1    | 0.1111 | 6  | 2 | [10,18] |
| chr5:147802027  | FBXO38   | UTR3        |                                                                                      | + | AtoG | 0.1    | 0.2    | 2  | 2 | [10,10] |
| chr5:41975312   | FBXO4    | coding_exon | ENST00000281623:QtoR;                                                                | + | AtoG | 0.1    | 0.2727 | 3  | 2 | [10,11] |
| chr5:41977131   | FBXO4    | coding_exon |                                                                                      | + | TtoC | 0.1    | 0.1    | 2  | 2 | [10,10] |
| chr2:73335529   | FBXO41   | UTR3        |                                                                                      | - | TtoC | 0.1    | 0.125  | 2  | 2 | [10,16] |
| chr2:73335677   | FBXO41   | UTR3        |                                                                                      | - | TtoC | 0.1053 | 0.1333 | 3  | 2 | [15,19] |
| chr1:16514300   | FBXO42   | coding_exon | ENST00000375592:EtoD;                                                                | - | AtoT | 0.1    | 0.1    | 3  | 2 | [10,10] |
| chr1:11641457   | FBXO44   | coding_exon | ENST00000251547:GtoE;ENST00000376770:GtoE;                                           | + | GtoA | 0.1304 | 0.2632 | 4  | 3 | [19,23] |
| chr1:11644396   | FBXO44   | UTR3        |                                                                                      | + | TtoC | 0.1    | 0.1    | 4  | 2 | [10,10] |
| chr1:11644592   | FBXO44   | UTR3        |                                                                                      | + | TtoG | 0.1    | 0.2    | 5  | 2 | [10,10] |
| chr6:153335140  | FBXO5    | coding_exon | ENST00000229758:QtoL;ENST00000367241:QtoL;                                           | - | AtoT | 0.1    | 0.1538 | 2  | 2 | [10,13] |
| chr22:31224796  | FBXO7    | UTR3        |                                                                                      | + | AtoG | 0.1    | 0.1429 | 6  | 3 | [10,17] |
| chr6:53065559   | FBXO9    | coding_exon | ENST00000244426:WtoR;ENST00000323557:WtoR;ENST00000370939:WtoR;                      | + | TtoC | 0.1    | 0.1111 | 5  | 2 | [10,10] |
| chr5:17128377   | FBXW11   | coding_exon | ENST00000265094:QtoR;ENST00000296933:QtoR;ENST00000393802:QtoR;                      | - | AtoG | 0.1    | 0.1333 | 2  | 2 | [10,15] |
| chr9:122573460  | FBXW2    | coding_exon | ENST00000340778:YtoD;ENST00000373926:YtoD;ENST00000444833:YtoD;                      | - | TtoG | 0.1    | 0.1    | 2  | 2 | [10,10] |
| chr9:122573461  | FBXW2    | coding_exon | ENST00000340778:StoR;ENST00000373926:StoR;ENST00000444833:StoR;                      | - | TtoA | 0.1    | 0.1    | 3  | 2 | [10,10] |
| chr9:122589934  | FBXW2    | coding_exon | ENST00000340778:StoP;ENST00000373926:StoP;ENST00000444833:StoP;                      | - | TtoC | 0.1    | 0.1053 | 4  | 2 | [10,19] |
| chr9:122566365  | FBXW2    | UTR3        |                                                                                      | - | TtoA | 0.1    | 0.1333 | 7  | 3 | [10,20] |
| chr9:138956702  | FBXW5    | coding_exon | ENST00000325285:LtoP;                                                                | - | TtoC | 0.1053 | 0.1304 | 7  | 2 | [19,25] |
| chr9:138954712  | FBXW5    | UTR3        |                                                                                      | - | CtoA | 0.1    | 0.2    | 3  | 3 | [10,10] |
| chr9:138954713  | FBXW5    | UTR3        |                                                                                      | - | AtoG | 0.1    | 0.2    | 3  | 2 | [10,10] |
| chr4:153463028  | FBXW7    | UTR3        |                                                                                      | - | TtoG | 0.1    | 0.125  | 2  | 2 | [10,16] |
| chr4:153675543  | FBXW7    | UTR5        |                                                                                      | - | TtoG | 0.3846 | 0.5    | 2  | 2 | [12,14] |
| chr19:7659663   | FCER2    | UTR3        |                                                                                      | - | CtoA | 0.1    | 0.2    | 4  | 2 | [10,20] |
| chr19:7659665   | FCER2    | UTR3        |                                                                                      | - | CtoA | 0.1111 | 0.15   | 8  | 3 | [18,25] |
| chr19:7659666   | FCER2    | UTR3        |                                                                                      | - | TtoA | 0.125  | 0.2121 | 4  | 4 | [17,36] |
| chr19:7672995   | FCER2    | UTR5        |                                                                                      | - | GtoT | 0.1    | 0.1053 | 2  | 2 | [10,19] |
| chr14:74259787  | FCF1     | coding_exon | ENST00000341162:Rto*;                                                                | + | CtoT | 0.1071 | 0.1667 | 4  | 4 | [12,36] |
| chr14:74252442  | FCF1     | coding_exon | ENST00000341162:NtoL;                                                                | + | AtoT | 0.1667 | 0.3    | 6  | 3 | [10,13] |
| chr14:74252414  | FCF1     | coding_exon | ENST00000341162:HtoY;                                                                | + | CtoT | 0.1176 | 0.25   | 6  | 3 | [12,17] |
| chr14:74252433  | FCF1     | coding_exon | ENST00000341162:FtoC;                                                                | + | TtoG | 0.1    | 0.15   | 4  | 2 | [10,20] |
| chr14:74269190  | FCF1     | coding_exon |                                                                                      | + | TtoC | 0.1    | 0.4    | 6  | 2 | [10,10] |
| chr14:74271420  | FCF1     | UTR3        |                                                                                      | + | GtoC | 0.1    | 0.1053 | 4  | 2 | [10,19] |
| chr11:72226105  | FCHSD2   | UTR3        |                                                                                      | - | TtoC | 0.1    | 0.1429 | 2  | 2 | [10,14] |
| chr11:72227069  | FCHSD2   | UTR3        |                                                                                      | - | TtoG | 0.1    | 0.1579 | 8  | 3 | [10,19] |
| chr1:155760958  | FCRL5    | coding_exon |                                                                                      | - | TtoC | 0.15   | 0.3    | 3  | 2 | [10,20] |
| chr1:155750805  | FCRL5    | UTR3        |                                                                                      | - | AtoC | 0.1    | 0.1    | 2  | 2 | [10,10] |
| chr1:155751511  | FCRL5    | UTR3        |                                                                                      | - | TtoG | 0.1    | 0.1    | 2  | 2 | [10,10] |
| chr1:159949958  | FCRLA    | UTR3        |                                                                                      | + | GtoA | 0.1    | 0.125  | 5  | 2 | [10,16] |
| chr8:11733878   | FDFT1    | UTR3        |                                                                                      | + | GtoT | 0.1    | 0.1    | 2  | 2 | [10,10] |
| chr8:11734171   | FDFT1    | UTR3        |                                                                                      | + | TtoC | 0.1176 | 0.3636 | 10 | 5 | [11,17] |
| chr8:11734176   | FDFT1    | UTR3        |                                                                                      | + | AtoG | 0.1    | 0.16   | 2  | 2 | [10,27] |
| chr1:153553455  | FDP5     | coding_exon |                                                                                      | + | AtoG | 0.1333 | 0.1429 | 2  | 2 | [14,15] |
| chr11:111185602 | FDXACB1  | coding_exon | ENST00000320165:YtoD;ENST00000398006:YtoD;ENST00000428306:YtoD;ENST00000428306:YtoD; | - | TtoG | 0.1    | 0.1053 | 5  | 2 | [10,19] |
| chr17:70380586  | FDXR     | coding_exon | ENST00000293195:StoG;ENST00000413947:TtoA;ENST00000420580:StoG;ENST00000420580:StoG; | - | AtoG | 0.1    | 0.1429 | 2  | 2 | [10,14] |
| chr17:70370239  | FDXR     | UTR3        |                                                                                      | - | TtoC | 0.1    | 0.1538 | 7  | 2 | [10,13] |
| chr15:66371054  | FEM1B    | UTR3        |                                                                                      | + | AtoC | 0.1    | 0.125  | 2  | 2 | [10,16] |
| chr11:63747580  | FERMT3   | UTR3        |                                                                                      | + | AtoC | 0.1094 | 0.125  | 7  | 4 | [33,83] |
| chr9:94812410   | FGD3     | coding_exon | ENST00000337352:VtoA;ENST00000375482:VtoA;ENST00000416701:VtoA;                      | + | TtoC | 0.1    | 0.15   | 3  | 2 | [10,20] |
| chr9:94838062   | FGD3     | UTR3        |                                                                                      | + | AtoC | 0.1    | 0.1667 | 4  | 3 | [10,19] |
| chr17:7287119   | FGF11    | coding_exon | ENST00000293829:VtoG;                                                                | + | TtoG | 0.1    | 0.1    | 2  | 2 | [10,10] |
| chr8:38401297   | FGFR1    | coding_exon | ENST00000310729:FtoV;ENST00000326324:FtoV;ENST00000335922:FtoV;ENST00000335922:FtoV; | - | TtoG | 0.1    | 0.1    | 3  | 2 | [10,10] |
| chr6:167356098  | FGFR1OP  | coding_exon | ENST00000283506:EtoV;ENST00000349556:EtoV;ENST00000366847:EtoV;ENST00000366847:EtoV; | + | AtoT | 0.1    | 0.1    | 6  | 2 | [10,10] |
| chr6:167373561  | FGFR1OP  | mixed       |                                                                                      | + | TtoC | 0.1    | 0.1    | 2  | 2 | [10,10] |
| chr12:27001830  | FGFR1OP2 | coding_exon | ENST00000229395:StoP;ENST00000327214:StoP;                                           | + | TtoC | 0.1    | 0.1364 | 4  | 3 | [10,23] |
| chr1:27822669   | FIG1     | coding_exon |                                                                                      | - | TtoA | 0.1    | 0.2143 | 3  | 2 | [10,14] |
| chr1:239747217  | FH       | coding_exon | ENST00000366560:ItoK;                                                                | - | TtoA | 0.1    | 0.2    | 7  | 4 | [20,32] |
| chr1:239727757  | FH       | coding_exon |                                                                                      | - | AtoG | 0.1579 | 0.2143 | 7  | 2 | [14,19] |
| chr2:105344151  | FHL2     | UTR3        |                                                                                      | - | TtoC | 0.1    | 0.1176 | 2  | 2 | [10,17] |
| chr1:38235321   | FHL3     | UTR3        |                                                                                      | - | TtoG | 0.1    | 0.125  | 5  | 2 | [10,16] |
| chr18:32410465  | FHOD3    | mixed       |                                                                                      | + | AtoG | 0.1    | 0.1    | 2  | 2 | [10,10] |
| chr11:65407967  | FIBP     | UTR3        |                                                                                      | - | GtoA | 0.125  | 0.5    | 9  | 9 | [11,21] |
| chr6:110219387  | FIG4     | coding_exon |                                                                                      | + | CtoA | 0.1    | 0.1    | 2  | 2 | [10,10] |
| chr7:50481914   | FIGNL1   | coding_exon | ENST00000451735:QtoR;                                                                | - | AtoG | 0.1    | 0.1    | 2  | 2 | [10,10] |
| chr7:50481106   | FIGNL1   | coding_exon |                                                                                      | - | TtoC | 0.1176 | 0.2    | 2  | 2 | [10,17] |
| chr7:50479508   | FIGNL1   | UTR3        |                                                                                      | - | TtoC | 0.1    | 0.1    | 2  | 2 | [10,10] |
| chr7:50480390   | FIGNL1   | UTR3        |                                                                                      | - | TtoC | 0.1    | 0.2    | 2  | 2 | [10,10] |



|                 |           |             |                                                                                      |   |      |        |        |    |    |          |
|-----------------|-----------|-------------|--------------------------------------------------------------------------------------|---|------|--------|--------|----|----|----------|
| chr16:74168887  | GABARAPL2 | UTR3        |                                                                                      | + | TtoA | 0.1111 | 0.1111 | 8  | 2  | [18,19]  |
| chr1:67926378   | GADD45A   | UTR3        |                                                                                      | + | TtoC | 0.1111 | 0.1333 | 5  | 2  | [15,18]  |
| chr2:38814513   | GALM      | UTR3        |                                                                                      | + | TtoC | 0.1    | 0.1111 | 2  | 2  | [10,18]  |
| chr2:38815148   | GALM      | UTR3        |                                                                                      | + | CtoA | 0.1    | 0.125  | 2  | 2  | [10,24]  |
| chr18:31511712  | GALNT1    | coding_exon | ENST00000269195:StoR;                                                                | + | TtoA | 0.1    | 0.1    | 2  | 2  | [10,10]  |
| chr18:31517384  | GALNT1    | coding_exon |                                                                                      | + | GtoA | 0.1    | 0.1333 | 2  | 2  | [10,15]  |
| chr18:31545500  | GALNT1    | UTR3        |                                                                                      | + | CtoT | 0.2    | 0.2143 | 4  | 2  | [10,14]  |
| chr18:31545544  | GALNT1    | UTR3        |                                                                                      | + | Atog | 0.3158 | 0.3571 | 2  | 2  | [14,19]  |
| chr18:31545584  | GALNT1    | UTR3        |                                                                                      | + | GtoC | 0.3571 | 0.5455 | 3  | 3  | [10,14]  |
| chr5:153736135  | GALNT10   | coding_exon | ENST00000297107:Atog;ENST00000425427:Atog;                                           | + | CtoG | 0.1    | 0.2    | 3  | 2  | [10,10]  |
| chr5:153778719  | GALNT10   | UTR3        |                                                                                      | + | TtoC | 0.1    | 0.1034 | 3  | 2  | [20,29]  |
| chr5:153778884  | GALNT10   | UTR3        |                                                                                      | + | TtoA | 0.1    | 0.1    | 4  | 2  | [10,10]  |
| chr1:228438406  | GALNT2    | coding_exon | ENST00000366672:VtoG;                                                                | + | TtoG | 0.1143 | 0.1333 | 5  | 2  | [15,36]  |
| chr1:228483302  | GALNT2    | UTR3        |                                                                                      | + | Atoc | 0.1    | 0.1562 | 6  | 4  | [10,33]  |
| chr12:50034334  | GALNT6    | UTR3        |                                                                                      | - | TtoA | 0.1    | 0.1111 | 3  | 2  | [10,18]  |
| chr4:174480854  | GALNT7    | UTR3        |                                                                                      | + | Atot | 0.1    | 0.1    | 2  | 2  | [10,10]  |
| chr4:174481274  | GALNT7    | UTR3        |                                                                                      | + | Atog | 0.1    | 0.1    | 2  | 2  | [10,10]  |
| chr11:11249317  | GALNT4    | coding_exon | ENST00000227756:StoP;                                                                | - | TtoC | 0.1    | 0.1176 | 2  | 2  | [10,17]  |
| chr9:34639049   | GALT      | coding_exon | ENST00000378842:TtoM;ENST00000450095:TtoM;                                           | + | CtoT | 0.1    | 0.1429 | 2  | 2  | [10,14]  |
| chr19:1348171   | GAMT      | UTR3        |                                                                                      | - | TtoG | 0.1    | 0.1111 | 2  | 2  | [10,10]  |
| chr11:62150937  | GANAB     | coding_exon | ENST00000346178:TtoP;ENST00000356638:TtoP;                                           | - | Atoc | 0.1176 | 0.1333 | 2  | 2  | [17,108] |
| chr11:62156790  | GANAB     | coding_exon |                                                                                      | - | TtoG | 0.1017 | 0.2083 | 3  | 2  | [49,62]  |
| chr12:6514890   | GAPDH     | mixed       |                                                                                      | + | TtoA | 0.9655 | 1      | 2  | 2  | [10,29]  |
| chr12:6514895   | GAPDH     | mixed       |                                                                                      | + | TtoG | 0.6667 | 0.9459 | 5  | 5  | [10,37]  |
| chr12:6517797   | GAPDH     | UTR3        |                                                                                      | + | CtoA | 0.1434 | 0.5973 | 11 | 11 | [89,300] |
| chr12:6517798   | GAPDH     | UTR3        |                                                                                      | + | Atog | 0.2083 | 0.7627 | 10 | 10 | [24,168] |
| chr12:6513943   | GAPDH     | UTR5        |                                                                                      | + | CtoG | 0.125  | 0.3    | 8  | 4  | [20,79]  |
| chr9:127134641  | GAPVD1    | coding_exon | ENST00000265956:NtoK;ENST00000297933:NtoK;ENST00000312123:NtoK;ENST00000312123:NtoK; | + | TtoA | 0.1    | 0.1429 | 3  | 2  | [10,14]  |
| chr9:127104865  | GAPVD1    | coding_exon | ENST00000265956:EtoA;ENST00000297933:EtoA;ENST00000312123:EtoA;ENST00000312123:EtoA; | + | Atoc | 0.1    | 0.2308 | 2  | 2  | [10,13]  |
| chr9:127139325  | GAPVD1    | coding_exon |                                                                                      | + | TtoA | 0.1    | 0.1818 | 3  | 2  | [10,11]  |
| chr9:127156766  | GAPVD1    | coding_exon |                                                                                      | + | Atog | 0.1    | 0.1538 | 5  | 3  | [10,13]  |
| chr9:127164908  | GAPVD1    | UTR3        |                                                                                      | + | TtoC | 0.1    | 0.1    | 4  | 2  | [10,10]  |
| chr9:127064055  | GAPVD1    | UTR5        |                                                                                      | + | CtoT | 0.1    | 0.1    | 2  | 2  | [10,10]  |
| chr7:30640033   | GARS      | UTR3        |                                                                                      | + | CtoA | 0.1515 | 0.1667 | 3  | 2  | [33,36]  |
| chr21:33804022  | GART      | coding_exon | ENST00000381815:LtoP;ENST00000381831:LtoP;ENST00000381839:LtoP;                      | - | TtoC | 0.1    | 0.1333 | 7  | 3  | [10,15]  |
| chr21:33822510  | GART      | coding_exon | ENST00000361093:VtoE;ENST00000381815:VtoE;ENST00000381831:VtoE;ENST00000381831:VtoE; | - | TtoA | 0.1111 | 0.1154 | 3  | 2  | [18,27]  |
| chr21:33825667  | GART      | coding_exon | ENST00000361093:StoP;ENST00000381815:StoP;ENST00000381831:StoP;ENST00000381831:StoP; | - | TtoC | 0.1    | 0.1538 | 2  | 2  | [10,13]  |
| chr21:33825060  | GART      | coding_exon | ENST00000361093:CtoG;ENST00000381815:CtoG;ENST00000381831:CtoG;ENST00000381831:CtoG; | - | TtoG | 0.1    | 0.1538 | 2  | 2  | [10,13]  |
| chr17:9758817   | GAS7      | UTR3        |                                                                                      | - | Atog | 0.1    | 0.125  | 3  | 2  | [10,16]  |
| chr16:88629588  | GAS8      | coding_exon | ENST00000268699:QtoR;                                                                | + | Atog | 0.1    | 0.1    | 2  | 2  | [10,10]  |
| chr7:91914836   | GATAD1    | UTR5        |                                                                                      | + | CtoG | 0.1    | 0.1    | 2  | 2  | [10,10]  |
| chr19:19477832  | GATAD2A   | UTR3        |                                                                                      | + | TtoC | 0.1111 | 0.1333 | 4  | 2  | [15,19]  |
| chr1:152049316  | GATAD2B   | coding_exon |                                                                                      | - | TtoC | 0.1    | 0.1053 | 5  | 2  | [10,20]  |
| chr1:152045625  | GATAD2B   | UTR3        |                                                                                      | - | TtoC | 0.1    | 0.1176 | 4  | 2  | [11,17]  |
| chr1:152049179  | GATAD2B   | UTR3        |                                                                                      | - | TtoA | 0.1    | 0.1    | 2  | 2  | [10,10]  |
| chr9:35730327   | GBA2      | coding_exon | ENST00000378094:VtoV;ENST00000378103:VtoV;                                           | - | Atog | 0.1    | 0.1    | 2  | 2  | [20,20]  |
| chr9:35727914   | GBA2      | coding_exon | ENST00000378088:VtoA;ENST00000378094:VtoA;ENST00000378103:VtoA;                      | - | TtoC | 0.1    | 0.1429 | 4  | 2  | [10,14]  |
| chr9:35726931   | GBA2      | UTR3        |                                                                                      | - | Atot | 0.1    | 0.1053 | 2  | 2  | [10,19]  |
| chr9:35727042   | GBA2      | UTR3        |                                                                                      | - | Atoc | 0.1    | 0.125  | 2  | 2  | [10,16]  |
| chr3:81631067   | GBE1      | coding_exon | ENST00000264326:FtoL;ENST00000429644:FtoL;ENST00000489715:FtoL;                      | - | TtoC | 0.1053 | 0.2857 | 11 | 6  | [13,31]  |
| chr3:81621953   | GBE1      | UTR3        |                                                                                      | - | TtoA | 0.1818 | 0.2    | 3  | 2  | [11,16]  |
| chr10:104126876 | GBF1      | coding_exon | ENST00000369983:VtoF;                                                                | + | GtoT | 0.1053 | 0.2632 | 10 | 2  | [19,19]  |
| chr10:104120171 | GBF1      | coding_exon | ENST00000369983:EtoV;                                                                | + | Atot | 0.12   | 0.2308 | 3  | 2  | [13,25]  |
| chr10:104126887 | GBF1      | coding_exon | ENST00000369983:DtoE;                                                                | + | CtoG | 0.1053 | 0.2222 | 8  | 2  | [18,19]  |
| chr10:104126878 | GBF1      | coding_exon |                                                                                      | + | CtoG | 0.1176 | 0.2632 | 8  | 4  | [14,19]  |
| chr22:36541161  | GCAT      | coding_exon | ENST00000248924:LtoP;ENST00000323205:LtoP;                                           | + | TtoC | 0.1    | 0.125  | 4  | 2  | [10,16]  |
| chr2:108475622  | GCC2      | coding_exon | ENST00000309863:QtoR;ENST00000409325:QtoR;                                           | + | Atog | 0.1    | 0.1    | 3  | 2  | [10,10]  |
| chr19:12865307  | GCDH      | mixed       |                                                                                      | + | TtoG | 0.1    | 0.3125 | 12 | 8  | [16,38]  |
| chr15:38846951  | GCHFR     | UTR3        |                                                                                      | + | Atoc | 0.1111 | 0.1364 | 5  | 3  | [22,27]  |
| chr12:119112547 | GCN11     | coding_exon | ENST00000300648:TtoP;                                                                | - | Atoc | 0.1176 | 0.1379 | 4  | 2  | [17,29]  |
| chr12:119107046 | GCN11     | coding_exon | ENST00000300648:LtoR;                                                                | - | TtoG | 0.1    | 0.2    | 6  | 2  | [10,10]  |
| chr12:119082091 | GCN11     | coding_exon |                                                                                      | - | TtoC | 0.125  | 0.1429 | 2  | 2  | [14,32]  |
| chr12:119049991 | GCN11     | UTR3        |                                                                                      | - | Atog | 0.1    | 0.1    | 2  | 2  | [10,20]  |
| chr16:19420836  | GDE1      | UTR3        |                                                                                      | - | Atog | 0.1    | 0.1538 | 3  | 2  | [10,13]  |
| chr12:54429900  | GDF11     | coding_exon |                                                                                      | + | TtoC | 0.1    | 0.1    | 3  | 2  | [10,10]  |
| chr10:5847737   | GDI2      | UTR3        |                                                                                      | - | CtoT | 0.1    | 0.2941 | 11 | 8  | [17,50]  |
| chr10:5847749   | GDI2      | UTR3        |                                                                                      | - | CtoT | 0.1026 | 0.1818 | 5  | 4  | [39,79]  |
| chr5:154262883  | GEMIN5    | coding_exon | ENST00000285873:LtoP;                                                                | - | TtoC | 0.1538 | 0.1765 | 2  | 2  | [13,17]  |
| chr5:74054006   | GFM2      | coding_exon | ENST00000296805:QtoR;ENST00000345239:QtoR;                                           | - | Atog | 0.1    | 0.1538 | 4  | 2  | [10,13]  |
| chr5:74082187   | GFM2      | coding_exon |                                                                                      | - | TtoC | 0.1    | 0.1    | 3  | 2  | [10,22]  |
| chr6:13468461   | GFOD1     | UTR3        |                                                                                      | - | TtoA | 0.1    | 0.1333 | 2  | 2  | [10,15]  |
| chr6:13468510   | GFOD1     | UTR3        |                                                                                      | - | GtoT | 0.1    | 0.25   | 3  | 2  | [10,13]  |
| chr6:13468511   | GFOD1     | UTR3        |                                                                                      | - | GtoC | 0.1    | 0.1818 | 3  | 2  | [10,11]  |
| chr2:69406727   | GFPT1     | UTR3        |                                                                                      | - | TtoA | 0.1    | 0.1    | 2  | 2  | [10,10]  |
| chr16:23384195  | GGA2      | UTR3        |                                                                                      | - | TtoG | 0.1    | 0.2308 | 6  | 3  | [10,19]  |
| chr16:23384198  | GGA2      | UTR3        |                                                                                      | - | TtoG | 0.1667 | 0.2    | 6  | 3  | [11,18]  |
| chr16:23385008  | GGA2      | UTR3        |                                                                                      | - | TtoG | 0.1667 | 0.1667 | 6  | 2  | [12,12]  |
| chr16:23385452  | GGA2      | UTR3        |                                                                                      | - | TtoA | 0.1429 | 0.1818 | 6  | 2  | [11,14]  |
| chr16:23385454  | GGA2      | UTR3        |                                                                                      | - | Atog | 0.1    | 0.1    | 3  | 2  | [10,10]  |
| chr16:23385456  | GGA2      | UTR3        |                                                                                      | - | TtoC | 0.1053 | 0.2    | 11 | 6  | [10,20]  |
| chr17:70744778  | GGA3      | UTR3        |                                                                                      | - | CtoA | 0.1    | 0.1875 | 7  | 4  | [16,20]  |
| chr17:70745215  | GGA3      | UTR3        |                                                                                      | - | TtoA | 0.1111 | 0.1429 | 3  | 2  | [14,27]  |
| chr8:64099047   | GGH       | coding_exon | ENST00000260118:KtoE;                                                                | - | Atog | 0.1429 | 0.1875 | 2  | 2  | [14,16]  |
| chr8:64090565   | GGH       | coding_exon |                                                                                      | - | TtoC | 0.125  | 0.1667 | 5  | 2  | [12,16]  |
| chr17:31987202  | GGNBP2    | coding_exon | ENST00000304718:LtoQ;ENST00000453197:LtoQ;                                           | + | TtoA | 0.1    | 0.2    | 12 | 4  | [10,15]  |
| chr17:32008719  | GGNBP2    | coding_exon | ENST00000304718:FtoV;ENST00000453197:FtoV;                                           | + | TtoG | 0.1    | 0.1538 | 4  | 2  | [10,13]  |
| chr17:32015899  | GGNBP2    | coding_exon |                                                                                      | + | TtoC | 0.1333 | 0.2    | 8  | 3  | [10,21]  |
| chr1:233572485  | GGPS1     | coding_exon |                                                                                      | + | Atog | 0.1818 | 0.1818 | 2  | 2  | [11,11]  |
| chr7:100122592  | GIGYF1    | coding_exon | ENST00000275732:FtoV;                                                                | - | TtoG | 0.1    | 0.1765 | 4  | 2  | [10,18]  |
| chr2:233385345  | GIGYF2    | coding_exon |                                                                                      | + | Atog | 0.1    | 0.125  | 2  | 2  | [10,16]  |
| chr20:25374611  | GINS1     | mixed       |                                                                                      | + | Atog | 0.1    | 0.1111 | 2  | 2  | [10,18]  |
| chr20:25374845  | GINS1     | UTR3        |                                                                                      | + | TtoA | 0.1    | 0.2222 | 2  | 2  | [10,10]  |
| chr16:84278676  | GINS2     | coding_exon |                                                                                      | - | CtoT | 0.1    | 0.1111 | 2  | 2  | [10,18]  |
| chr16:56995921  | GINS3     | coding_exon |                                                                                      | + | TtoC | 0.1    | 0.1    | 2  | 2  | [10,10]  |
| chr16:56997245  | GINS3     | UTR3        |                                                                                      | + | TtoC | 0.1    | 0.1538 | 4  | 2  | [10,13]  |
| chr8:41516668   | GINS4     | coding_exon | ENST00000276533:LtoI;                                                                | + | CtoA | 0.1111 | 0.125  | 2  | 2  | [18,24]  |

|                  |          |             |                                                                                     |   |      |        |        |    |    |            |
|------------------|----------|-------------|-------------------------------------------------------------------------------------|---|------|--------|--------|----|----|------------|
| chr8:41520002    | GIN54    | UTR3        |                                                                                     | + | AtoC | 0.1    | 0.1667 | 2  | 2  | [10,12]    |
| chr8:41520110    | GIN54    | UTR3        |                                                                                     | + | TtoA | 0.1333 | 0.1429 | 5  | 2  | [14,15]    |
| chr8:41520695    | GIN54    | UTR3        |                                                                                     | + | AtoG | 0.129  | 0.1765 | 9  | 3  | [17,31]    |
| chr19:14449627   | GIPC1    | UTR3        |                                                                                     | - | TtoC | 0.1    | 0.1111 | 3  | 2  | [10,18]    |
| chr12:1088560631 | GIT2     | coding_exon | ENST00000338373:TtoN;ENST00000343646:TtoN;ENST00000345474:TtoN;ENST00000345474:TtoN | - | CtoA | 0.1    | 0.1    | 2  | 2  | [10,10]    |
| chr12:108852268  | GIT2     | UTR3        |                                                                                     | - | TtoC | 0.1    | 0.1    | 2  | 2  | [10,10]    |
| chr12:108853128  | GIT2     | UTR3        |                                                                                     | - | GtoA | 0.1    | 0.1    | 3  | 2  | [10,10]    |
| chr17:40238153   | GJC1     | mixed       |                                                                                     | - | TtoC | 0.1    | 0.1053 | 2  | 2  | [10,19]    |
| chr3:33040789    | GLB1     | coding_exon |                                                                                     | - | AtoG | 0.1    | 0.1111 | 2  | 2  | [10,18]    |
| chr7:8077235     | GLCC1    | coding_exon | ENST00000223145:QtoK;ENST00000456919:QtoK;                                          | + | CtoA | 0.1282 | 0.1667 | 4  | 3  | [12,39]    |
| chr7:8093891     | GLCC1    | UTR3        |                                                                                     | + | TtoG | 0.2    | 0.2105 | 2  | 2  | [10,19]    |
| chr7:8095043     | GLCC1    | UTR3        |                                                                                     | + | TtoA | 0.1    | 0.1333 | 4  | 2  | [10,32]    |
| chr9:6579230     | GLDC     | coding_exon |                                                                                     | - | GtoA | 0.2258 | 0.5455 | 3  | 3  | [11,31]    |
| chr9:130324877   | GLE1     | coding_exon | ENST00000309971:HtoR;ENST00000372770:HtoR;                                          | + | AtoG | 0.1111 | 0.1515 | 6  | 2  | [27,33]    |
| chr9:130325908   | GLE1     | coding_exon | ENST00000309971:CtoG;ENST00000372770:CtoG;                                          | + | TtoG | 0.1    | 0.1    | 3  | 2  | [10,10]    |
| chr16:73198103   | GLG1     | coding_exon | ENST00000205061:WtoG;ENST00000422840:WtoG;ENST00000447066:WtoG;                     | - | TtoG | 0.1    | 0.1111 | 2  | 2  | [10,19]    |
| chr16:73077308   | GLG1     | coding_exon |                                                                                     | - | AtoG | 0.55   | 0.5909 | 2  | 2  | [40,44]    |
| chr12:74178926   | GLPR1    | coding_exon | ENST00000456650:LtoR;                                                               | + | TtoG | 0.1    | 0.1    | 4  | 2  | [10,10]    |
| chr17:609495     | GLOD4    | UTR3        |                                                                                     | - | AtoC | 0.1    | 0.1667 | 3  | 2  | [10,12]    |
| chr5:95178004    | GLRX     | coding_exon | ENST00000237858:TtoR;ENST00000379979:TtoR;ENST00000448201:TtoR;                     | - | CtoG | 0.125  | 0.3    | 10 | 3  | [10,24]    |
| chr5:95177977    | GLRX     | coding_exon | ENST00000237858:QtoR;ENST00000379979:QtoR;ENST00000448201:QtoR;                     | - | AtoG | 0.1    | 0.1538 | 7  | 2  | [10,14]    |
| chr5:95177998    | GLRX     | coding_exon | ENST00000237858:LtoQ;ENST00000379979:LtoQ;ENST00000448201:LtoQ;                     | - | TtoA | 0.1667 | 0.3333 | 7  | 4  | [15,21]    |
| chr1:191332427   | GLRX2    | coding_exon | ENST00000367439:LtoR;ENST00000367440:LtoR;                                          | - | TtoA | 0.1    | 0.1111 | 3  | 2  | [10,10]    |
| chr1:191332433   | GLRX2    | coding_exon | ENST00000367439:LtoP;ENST00000367440:LtoP;                                          | - | TtoC | 0.1    | 0.125  | 5  | 2  | [10,16]    |
| chr2:191503510   | GLS      | coding_exon | ENST00000320717:NtoD;ENST00000338435:NtoD;ENST00000409215:NtoD;ENST00000320717:NtoD | + | AtoG | 0.1    | 0.1364 | 4  | 2  | [22,30]    |
| chr2:191507031   | GLS      | mixed       |                                                                                     | + | AtoG | 0.1667 | 0.1667 | 3  | 2  | [12,18]    |
| chr2:191507081   | GLS      | mixed       |                                                                                     | + | TtoA | 0.1    | 0.1304 | 2  | 2  | [21,24]    |
| chr19:17551292   | GLT25D1  | coding_exon | ENST00000252599:VtoA;ENST00000379714:VtoA;                                          | + | TtoC | 0.1    | 0.1667 | 2  | 2  | [10,12]    |
| chr19:52940631   | GLTSCR2  | coding_exon | ENST00000246802:MtoI;ENST00000446535:MtoI;                                          | + | GtoC | 0.125  | 0.25   | 3  | 2  | [16,16]    |
| chr19:52940634   | GLTSCR2  | coding_exon |                                                                                     | + | GtoT | 0.1    | 0.125  | 5  | 2  | [10,32]    |
| chr19:52952124   | GLTSCR2  | UTR3        |                                                                                     | + | CtoA | 0.1429 | 0.1818 | 3  | 2  | [11,21]    |
| chr10:88803080   | GLUD1    | coding_exon | ENST00000277865:RtoM;                                                               | - | GtoT | 0.1429 | 0.1667 | 2  | 2  | [12,14]    |
| chr6:1906016     | GMD5     | coding_exon | ENST00000380815:StoP;                                                               | - | TtoC | 0.1176 | 0.1818 | 3  | 2  | [11,17]    |
| chr1:28913869    | GMEB1    | coding_exon | ENST00000294409:DtoE;ENST00000361872:DtoE;ENST00000373816:DtoE;ENST00000373816:DtoE | + | TtoA | 0.1    | 0.1111 | 4  | 2  | [18,20]    |
| chr1:28916980    | GMEB1    | UTR3        |                                                                                     | + | AtoC | 0.1    | 0.1    | 2  | 2  | [10,10]    |
| chr20:61699570   | GMEB2    | coding_exon | ENST00000266068:NtoH;ENST00000370069:NtoH;ENST00000370077:NtoH;                     | - | AtoC | 0.1    | 0.1    | 3  | 2  | [10,10]    |
| chr20:61690429   | GMEB2    | UTR3        |                                                                                     | - | CtoG | 0.1    | 0.1    | 2  | 2  | [10,10]    |
| chr20:61690523   | GMEB2    | UTR3        |                                                                                     | - | TtoG | 0.1    | 0.1    | 3  | 2  | [10,10]    |
| chr19:19605988   | GMIP     | coding_exon | ENST00000203556:RtoQ;ENST00000445806:RtoQ;                                          | - | GtoA | 0.4167 | 0.439  | 2  | 2  | [41,84]    |
| chr6:24883212    | GMNN     | UTR5        |                                                                                     | + | GtoA | 0.125  | 0.3333 | 2  | 2  | [15,16]    |
| chr3:49733935    | GMPPB    | UTR3        |                                                                                     | - | GtoA | 0.1    | 0.1    | 5  | 2  | [10,10]    |
| chr3:49733941    | GMPPB    | UTR3        |                                                                                     | - | AtoG | 0.1    | 0.1053 | 2  | 2  | [10,19]    |
| chr7:2735417     | GNA12    | UTR3        |                                                                                     | - | TtoG | 0.1    | 0.1    | 2  | 2  | [10,10]    |
| chr7:2736238     | GNA12    | UTR3        |                                                                                     | - | AtoC | 0.1    | 0.125  | 3  | 3  | [24,30]    |
| chr7:2737020     | GNA12    | UTR3        |                                                                                     | - | TtoG | 0.125  | 0.1667 | 3  | 2  | [12,16]    |
| chr17:60444881   | GNA13    | coding_exon |                                                                                     | - | TtoC | 0.1    | 0.25   | 8  | 3  | [10,12]    |
| chr17:60439259   | GNA13    | UTR3        |                                                                                     | - | TtoG | 0.1    | 0.3077 | 6  | 4  | [10,20]    |
| chr17:60439947   | GNA13    | UTR3        |                                                                                     | - | TtoA | 0.1111 | 0.1818 | 5  | 2  | [11,18]    |
| chr1:109936795   | GNAI3    | UTR3        |                                                                                     | + | CtoT | 0.1538 | 0.25   | 6  | 2  | [12,13]    |
| chr1:109937658   | GNAI3    | UTR3        |                                                                                     | + | CtoA | 0.1    | 0.2    | 3  | 2  | [10,10]    |
| chr20:56919632   | GNAS     | UTR3        |                                                                                     | + | TtoC | 0.1053 | 0.125  | 4  | 2  | [16,19]    |
| chr1:1708124     | GNB1     | UTR3        |                                                                                     | - | AtoG | 0.1    | 0.1875 | 11 | 5  | [15,30]    |
| chr1:1708127     | GNB1     | UTR3        |                                                                                     | - | GtoA | 0.1    | 0.1875 | 7  | 3  | [16,30]    |
| chr5:180597737   | GNB2L1   | mixed       |                                                                                     | - | TtoG | 0.1377 | 0.1973 | 6  | 2  | [845,1409] |
| chr5:180598671   | GNB2L1   | mixed       |                                                                                     | - | TtoG | 0.1    | 0.625  | 15 | 11 | [10,32]    |
| chr5:180598672   | GNB2L1   | mixed       |                                                                                     | - | GtoA | 0.1111 | 0.3158 | 13 | 11 | [12,34]    |
| chr5:180596541   | GNB2L1   | UTR3        |                                                                                     | - | TtoA | 0.25   | 0.6    | 10 | 10 | [12,27]    |
| chr5:180596546   | GNB2L1   | UTR3        |                                                                                     | - | TtoC | 0.1061 | 0.3882 | 17 | 8  | [85,223]   |
| chr5:180603508   | GNB2L1   | UTR5        |                                                                                     | - | CtoT | 0.1    | 0.1818 | 5  | 3  | [10,19]    |
| chr15:50205438   | GNB5     | coding_exon | ENST00000261837:StoR;ENST00000358784:StoR;ENST00000396335:StoR;                     | - | TtoA | 0.1    | 0.1    | 2  | 2  | [10,10]    |
| chr14:51504587   | GNG2     | UTR3        |                                                                                     | + | AtoT | 0.1    | 0.1    | 2  | 2  | [10,10]    |
| chr14:51504700   | GNG2     | UTR3        |                                                                                     | + | TtoG | 0.1    | 0.1    | 2  | 2  | [10,10]    |
| chr14:51504783   | GNG2     | UTR3        |                                                                                     | + | AtoG | 0.1429 | 0.3    | 3  | 2  | [10,21]    |
| chr6:30630380    | GNL1     | coding_exon | ENST00000376602:VtoG;ENST00000376621:VtoG;ENST00000426875:VtoG;ENST00000376602:VtoG | - | TtoG | 0.1    | 0.125  | 6  | 2  | [16,21]    |
| chr1:37806535    | GNL2     | coding_exon | ENST00000373062:GtoR;                                                               | - | GtoA | 0.1    | 0.1111 | 2  | 2  | [10,18]    |
| chr3:52696595    | GNL3     | coding_exon | ENST00000354540:QtoR;ENST00000394799:QtoR;ENST00000418458:QtoR;ENST00000354540:QtoR | + | AtoG | 0.1    | 0.1429 | 9  | 2  | [36,40]    |
| chr3:52703472    | GNL3     | UTR3        |                                                                                     | + | TtoA | 0.125  | 0.1333 | 9  | 2  | [31,34]    |
| chr1:229467739   | GNPAT    | coding_exon | ENST00000366647:NtoD;                                                               | + | AtoG | 0.1034 | 0.1176 | 4  | 2  | [29,35]    |
| chr1:229480108   | GNPAT    | UTR3        |                                                                                     | + | TtoC | 0.1034 | 0.1053 | 9  | 2  | [19,30]    |
| chr5:141362927   | GNPDA1   | coding_exon | ENST00000311337:StoT;ENST00000458112:StoT;                                          | - | TtoA | 0.1    | 0.1    | 4  | 2  | [10,10]    |
| chr5:141361616   | GNPDA1   | UTR3        |                                                                                     | - | AtoG | 0.1    | 0.1667 | 2  | 2  | [10,12]    |
| chr14:52318354   | GNPNAT1  | coding_exon |                                                                                     | - | TtoC | 0.1    | 0.1429 | 2  | 2  | [10,14]    |
| chr14:52313599   | GNPNAT1  | UTR3        |                                                                                     | - | GtoC | 0.1    | 0.1    | 2  | 2  | [10,10]    |
| chr12:63396591   | GNS      | mixed       |                                                                                     | - | CtoA | 0.1    | 0.1    | 2  | 2  | [10,10]    |
| chr12:63393623   | GNS      | UTR3        |                                                                                     | - | TtoA | 0.1    | 0.1154 | 3  | 3  | [10,26]    |
| chr12:63394880   | GNS      | UTR3        |                                                                                     | - | GtoA | 0.1    | 0.1    | 3  | 2  | [10,10]    |
| chr9:126714123   | GOLGA1   | coding_exon | ENST00000373555:TtoS;                                                               | - | AtoT | 0.1    | 0.1818 | 2  | 2  | [10,11]    |
| chr9:130059564   | GOLGA2   | coding_exon | ENST00000342583:HtoR;ENST00000421699:HtoR;                                          | - | AtoG | 0.1304 | 0.1429 | 2  | 2  | [14,23]    |
| chr9:130059028   | GOLGA2   | UTR3        |                                                                                     | - | TtoC | 0.1333 | 0.1818 | 3  | 2  | [11,15]    |
| chr12:99074687   | GOLGA2L1 | UTR3        |                                                                                     | - | GtoA | 0.1    | 0.1    | 2  | 2  | [10,10]    |
| chr12:131882878  | GOLGA3   | coding_exon | ENST00000204726:VtoA;ENST00000450791:VtoA;ENST00000456883:VtoA;                     | - | TtoC | 0.1154 | 0.2    | 3  | 2  | [10,26]    |
| chr12:131882519  | GOLGA3   | coding_exon | ENST00000204726:StoP;ENST00000450791:StoP;ENST00000456883:StoP;                     | - | TtoC | 0.1    | 0.1667 | 7  | 4  | [10,18]    |
| chr12:131864335  | GOLGA3   | coding_exon | ENST00000204726:DtoN;ENST00000450791:DtoN;ENST00000456883:DtoN;                     | - | GtoA | 0.25   | 0.625  | 2  | 2  | [12,24]    |
| chr12:131855676  | GOLGA3   | UTR3        |                                                                                     | - | TtoG | 0.1    | 0.2    | 3  | 2  | [10,10]    |
| chr12:131858545  | GOLGA3   | UTR3        |                                                                                     | - | GtoT | 0.4583 | 0.625  | 2  | 2  | [24,24]    |
| chr12:131858658  | GOLGA3   | UTR3        |                                                                                     | - | TtoG | 0.1    | 0.1    | 2  | 2  | [10,10]    |
| chr12:131858834  | GOLGA3   | UTR3        |                                                                                     | - | AtoG | 0.1667 | 0.1818 | 2  | 2  | [11,12]    |
| chr12:131859540  | GOLGA3   | UTR3        |                                                                                     | - | GtoC | 0.1    | 0.1    | 2  | 2  | [10,10]    |
| chr3:37343120    | GOLGA4   | coding_exon | ENST00000273176:VtoD;ENST00000356847:VtoD;ENST00000361924:VtoD;ENST00000273176:VtoD | + | TtoA | 0.1    | 0.1176 | 5  | 2  | [10,17]    |
| chr3:37340849    | GOLGA4   | coding_exon | ENST00000273176:QtoR;ENST00000356847:QtoR;ENST00000361924:QtoR;ENST00000273176:QtoR | + | AtoG | 0.1    | 0.1    | 4  | 2  | [10,10]    |
| chr3:37342182    | GOLGA4   | coding_exon | ENST00000273176:KtoN;ENST00000356847:KtoN;ENST00000361924:KtoN;ENST00000273176:KtoN | + | AtoC | 0.1    | 0.1111 | 2  | 2  | [10,18]    |
| chr3:37344167    | GOLGA4   | coding_exon | ENST00000273176:Etog;ENST00000356847:Etog;ENST00000361924:Etog;ENST00000273176:Etog | + | AtoG | 0.1    | 0.1    | 3  | 2  | [10,10]    |
| chr3:37343844    | GOLGA4   | coding_exon |                                                                                     | + | TtoG | 0.1    | 0.2    | 4  | 2  | [10,10]    |
| chr3:122894071   | GOLGB1   | coding_exon | ENST00000340645:VtoA;ENST00000393667:VtoA;                                          | - | TtoC | 0.1538 | 0.1667 | 3  | 2  | [12,13]    |
| chr3:122892914   | GOLGB1   | coding_exon | ENST00000340645:LtoM;ENST00000393667:LtoM;                                          | - | CtoA | 0.1    | 0.1    | 2  | 2  | [10,10]    |
| chr3:122896113   | GOLGB1   | coding_exon | ENST00000340645:Etok;ENST00000393667:Etok;                                          | - | GtoA | 0.1053 | 0.1081 | 4  | 2  | [19,37]    |

|                 |         |             |                                                                                      |   |      |        |        |    |    |         |
|-----------------|---------|-------------|--------------------------------------------------------------------------------------|---|------|--------|--------|----|----|---------|
| chr3:122869078  | GOLGB1  | coding_exon |                                                                                      | - | AtaG | 0.1    | 0.1111 | 3  | 2  | [10,18] |
| chr3:169229782  | GOLIM4  | coding_exon | ENST00000309027:QtoR;ENST00000470487:QtoR;                                           | - | AtaG | 0.1    | 0.1    | 3  | 2  | [10,10] |
| chr3:169229710  | GOLIM4  | coding_exon | ENST00000309027:Etog;ENST00000470487:Etog;                                           | - | AtaG | 0.1176 | 0.1429 | 5  | 2  | [14,17] |
| chr12:21551100  | GOLT1B  | coding_exon | ENST00000229314:LtoV;                                                                | + | TtoG | 0.1    | 0.1    | 3  | 2  | [10,10] |
| chr1:154014233  | GON4L   | coding_exon | ENST00000271883:FtoC;ENST00000361040:FtoC;ENST00000368327:FtoC;ENST00000368327:FtoC; | - | TtoG | 0.1    | 0.1    | 2  | 2  | [10,10] |
| chr1:153993406  | GON4L   | coding_exon |                                                                                      | - | GtoA | 0.1    | 0.125  | 3  | 3  | [10,16] |
| chr1:154020201  | GON4L   | coding_exon |                                                                                      | - | CtoT | 0.2    | 1      | 7  | 7  | [10,18] |
| chr1:154020206  | GON4L   | coding_exon |                                                                                      | - | AtaG | 0.8    | 1      | 6  | 6  | [11,17] |
| chr3:39114855   | GORASP1 | coding_exon | ENST00000319283:DtoA;ENST00000422110:DtoA;ENST00000479927:DtoA;                      | - | AtaC | 0.1    | 0.1    | 2  | 2  | [10,10] |
| chr3:39113871   | GORASP1 | UTR3        |                                                                                      | - | AtoT | 0.1    | 0.1    | 2  | 2  | [10,11] |
| chr2:171531334  | GORASP2 | UTR3        |                                                                                      | + | TtoC | 0.1034 | 0.1081 | 8  | 3  | [31,66] |
| chr17:25871098  | GOSR1   | coding_exon |                                                                                      | + | AtaG | 0.1    | 0.1    | 3  | 2  | [10,10] |
| chr17:25876463  | GOSR1   | UTR3        |                                                                                      | + | AtaG | 0.1176 | 0.1538 | 6  | 3  | [13,18] |
| chr17:42371411  | GOSR2   | mixed       |                                                                                      | + | GtoT | 0.125  | 0.1333 | 3  | 2  | [15,16] |
| chr17:42372550  | GOSR2   | mixed       |                                                                                      | + | TtoC | 0.1    | 0.1818 | 3  | 2  | [10,11] |
| chr17:42373160  | GOSR2   | UTR3        |                                                                                      | + | GtoA | 0.1    | 0.1818 | 3  | 2  | [10,11] |
| chr17:42373646  | GOSR2   | UTR3        |                                                                                      | + | GtoT | 0.1    | 0.1    | 2  | 2  | [10,10] |
| chr16:57298537  | GOT2    | UTR3        |                                                                                      | - | AtaG | 0.1818 | 0.5    | 10 | 10 | [10,17] |
| chr17:39833281  | GPATCH8 | coding_exon | ENST00000335500:StoP;                                                                | - | TtoC | 0.1    | 0.1429 | 5  | 2  | [10,14] |
| chr17:39833504  | GPATCH8 | coding_exon | ENST00000335500:DtoE;                                                                | - | TtoG | 0.1    | 0.1429 | 2  | 2  | [10,14] |
| chr17:39833495  | GPATCH8 | coding_exon |                                                                                      | - | TtoC | 0.1    | 0.1111 | 2  | 2  | [18,20] |
| chr17:39830321  | GPATCH8 | UTR3        |                                                                                      | - | GtoA | 0.1    | 0.1333 | 3  | 2  | [10,15] |
| chr5:56578661   | GPBP1   | coding_exon |                                                                                      | + | TtoC | 0.125  | 0.1429 | 3  | 2  | [14,16] |
| chr5:56578781   | GPBP1   | coding_exon |                                                                                      | + | TtoA | 0.1333 | 0.1765 | 5  | 2  | [15,17] |
| chr1:458966141  | GPBP1L1 | UTR3        |                                                                                      | - | AtaG | 0.1053 | 0.15   | 8  | 3  | [19,44] |
| chr1:45898920   | GPBP1L1 | UTR5        |                                                                                      | - | TtoG | 0.1    | 0.1333 | 2  | 2  | [10,15] |
| chr1:45899369   | GPBP1L1 | UTR5        |                                                                                      | - | TtoG | 0.1    | 0.1    | 4  | 2  | [10,10] |
| chr2:157136035  | GPD2    | coding_exon | ENST00000310454:DtoE;ENST00000409674:DtoE;ENST00000438166:DtoE;                      | + | TtoA | 0.1    | 0.1538 | 6  | 3  | [10,13] |
| chr14:66705421  | PHNN    | coding_exon | ENST00000305960:VtoG;ENST00000315266:VtoG;ENST00000478722:VtoG;                      | + | TtoG | 0.1176 | 0.2727 | 6  | 4  | [10,20] |
| chr19:39583074  | GPI     | UTR3        |                                                                                      | + | GtoA | 0.1031 | 0.5385 | 12 | 12 | [11,97] |
| chr19:39583075  | GPI     | UTR3        |                                                                                      | + | GtoA | 0.175  | 0.4167 | 3  | 3  | [10,43] |
| chr2:27727152   | GNP1    | UTR3        |                                                                                      | + | AtaG | 0.1053 | 0.1818 | 4  | 2  | [11,19] |
| chr9:131885669  | GPR107  | coding_exon | ENST00000347136:StoP;ENST00000372406:StoP;ENST00000372410:StoP;ENST00000372410:StoP; | + | TtoC | 0.1    | 0.1    | 2  | 2  | [10,10] |
| chr9:131885669  | GPR107  | coding_exon |                                                                                      | + | TtoC | 0.1    | 0.1429 | 2  | 2  | [10,14] |
| chr19:6685248   | GPR108  | mixed       |                                                                                      | - | TtoC | 0.1    | 0.2    | 3  | 2  | [10,10] |
| chr16:56168144  | GPR114  | mixed       |                                                                                      | + | AtaG | 0.1111 | 0.1111 | 4  | 2  | [18,18] |
| chr1:234409911  | GPR137B | coding_exon | ENST00000366591:VtoA;ENST00000366592:VtoA;                                           | + | TtoC | 0.2    | 0.2308 | 7  | 2  | [10,14] |
| chr3:99734681   | GPR15   | mixed       |                                                                                      | + | TtoC | 0.1389 | 0.2308 | 5  | 2  | [13,36] |
| chr3:171285142  | GPR160  | coding_exon | ENST00000355897:StoT;                                                                | + | TtoA | 0.1    | 0.2    | 2  | 2  | [10,10] |
| chr3:171284558  | GPR160  | coding_exon | ENST00000355897:KtoR;                                                                | + | AtaG | 0.1    | 0.2    | 4  | 2  | [10,15] |
| chr3:128776733  | GPR175  | coding_exon | ENST00000355552:LtoP;ENST00000450633:LtoP;ENST00000489960:LtoP;                      | - | TtoC | 0.1    | 0.1333 | 5  | 3  | [10,18] |
| chr3:128774647  | GPR175  | UTR3        |                                                                                      | - | TtoC | 0.2    | 0.3636 | 3  | 3  | [10,11] |
| chr13:94062525  | GPR180  | coding_exon | ENST00000376958:KtoE;                                                                | + | AtaG | 0.1    | 0.1    | 2  | 2  | [10,10] |
| chr2:231481135  | GPR55   | mixed       |                                                                                      | - | AtaC | 0.1111 | 0.375  | 2  | 2  | [16,27] |
| chr16:45501197  | GPT2    | coding_exon | ENST00000340124:LtoP;ENST00000440783:LtoP;                                           | + | TtoC | 0.1    | 0.125  | 2  | 2  | [10,16] |
| chr16:45515940  | GPT2    | coding_exon | ENST00000340124:AtoS;ENST00000440783:AtoS;                                           | + | GtoT | 0.1    | 0.1    | 2  | 2  | [10,10] |
| chr3:49369614   | GPX1    | UTR3        |                                                                                      | - | AtaG | 0.1    | 0.2727 | 7  | 4  | [10,19] |
| chr3:49369615   | GPX1    | UTR3        |                                                                                      | - | GtoA | 0.1034 | 0.45   | 21 | 20 | [10,59] |
| chr3:49369616   | GPX1    | UTR3        |                                                                                      | - | AtaG | 0.1333 | 0.1633 | 9  | 2  | [30,49] |
| chr19:40209205  | GRAMD1A | UTR3        |                                                                                      | + | TtoC | 0.1111 | 0.1579 | 5  | 4  | [18,44] |
| chr17:70826870  | GRB2    | UTR3        |                                                                                      | - | GtoC | 0.125  | 0.1333 | 2  | 2  | [15,16] |
| chr9:37426949   | GRHPR   | UTR3        |                                                                                      | + | AtaG | 0.102  | 0.16   | 8  | 5  | [16,49] |
| chr10:121130427 | GRK5    | mixed       |                                                                                      | + | GtoA | 0.1    | 0.1    | 3  | 2  | [10,10] |
| chr5:176791614  | GRK6    | coding_exon | ENST00000355472:HtoP;ENST00000355958:HtoP;ENST00000393576:HtoP;                      | + | AtaC | 0.1    | 0.1111 | 4  | 2  | [18,20] |
| chr19:52195609  | GRLF1   | coding_exon | ENST00000317082:TtoP;ENST00000404338:TtoP;                                           | + | AtaC | 0.1    | 0.1    | 2  | 2  | [10,10] |
| chr19:52184656  | GRLF1   | coding_exon | ENST00000317082:LtoP;ENST00000404338:LtoP;                                           | + | TtoC | 0.1    | 0.125  | 2  | 2  | [20,24] |
| chr19:52114246  | GRLF1   | coding_exon |                                                                                      | + | TtoC | 0.1    | 0.1    | 2  | 2  | [10,10] |
| chr19:52196128  | GRLF1   | mixed       |                                                                                      | + | TtoC | 0.1    | 0.1667 | 4  | 2  | [12,20] |
| chr19:52198012  | GRLF1   | UTR3        |                                                                                      | + | TtoC | 0.1    | 0.1    | 3  | 2  | [10,10] |
| chr4:71904392   | GRSF1   | UTR3        |                                                                                      | - | TtoG | 0.1    | 0.1    | 2  | 2  | [10,10] |
| chr19:53647788  | GRWD1   | coding_exon |                                                                                      | + | AtaC | 0.1333 | 0.2727 | 3  | 2  | [11,15] |
| chr19:53648960  | GRWD1   | UTR3        |                                                                                      | + | AtaG | 0.1    | 0.1    | 4  | 2  | [10,20] |
| chr19:53648966  | GRWD1   | UTR3        |                                                                                      | + | CtoA | 0.1    | 0.1818 | 2  | 2  | [10,11] |
| chr3:121024141  | GSK3B   | UTR3        |                                                                                      | - | TtoA | 0.1    | 0.1053 | 4  | 2  | [10,19] |
| chr3:121027474  | GSK3B   | UTR3        |                                                                                      | - | TtoG | 0.1    | 0.1    | 3  | 2  | [10,10] |
| chr3:121027634  | GSK3B   | UTR3        |                                                                                      | - | AtoT | 0.1    | 0.1    | 2  | 2  | [10,10] |
| chr16:11889042  | GSPT1   | coding_exon |                                                                                      | - | TtoC | 0.1053 | 0.1176 | 3  | 2  | [17,19] |
| chr16:11896341  | GSPT1   | coding_exon |                                                                                      | - | TtoC | 0.1538 | 0.16   | 2  | 2  | [13,25] |
| chr16:11874069  | GSPT1   | UTR3        |                                                                                      | - | AtaG | 0.1053 | 0.2308 | 6  | 5  | [13,19] |
| chr8:30655761   | GSR     | UTR3        |                                                                                      | - | TtoA | 0.1    | 0.1    | 4  | 2  | [10,10] |
| chr4:106859965  | GSTCD   | coding_exon |                                                                                      | + | AtaG | 0.1818 | 0.2    | 3  | 2  | [11,15] |
| chr1:110005385  | GSTM4   | mixed       |                                                                                      | + | TtoC | 0.1    | 0.2143 | 8  | 4  | [10,24] |
| chr11:67110698  | GSTP1   | mixed       |                                                                                      | + | CtoA | 0.3    | 0.375  | 5  | 4  | [16,40] |
| chr14:76867621  | GSTZ1   | UTR3        |                                                                                      | + | TtoG | 0.1333 | 0.1429 | 2  | 2  | [14,15] |
| chr14:80721638  | GTF2A1  | coding_exon | ENST00000298173:QtoR;ENST00000344860:QtoR;ENST00000393604:QtoR;ENST00000393604:QtoR; | - | AtaG | 0.1    | 0.1818 | 4  | 2  | [10,11] |
| chr14:80721637  | GTF2A1  | coding_exon |                                                                                      | - | AtaG | 0.1    | 0.1    | 2  | 2  | [10,10] |
| chr15:57721658  | GTF2A2  | coding_exon | ENST00000396060:DtoE;ENST00000396061:DtoE;ENST00000396063:DtoE;ENST00000396063:DtoE; | - | TtoA | 0.1154 | 0.122  | 12 | 3  | [27,41] |
| chr15:57718394  | GTF2A2  | UTR3        |                                                                                      | - | TtoA | 0.1429 | 0.1538 | 4  | 2  | [13,14] |
| chr1:89091326   | GTF2B   | UTR3        |                                                                                      | - | TtoC | 0.1    | 0.1    | 2  | 2  | [10,10] |
| chr3:121982892  | GTF2E1  | coding_exon | ENST00000283875:PtoQ;                                                                | + | CtoA | 0.1    | 0.1    | 2  | 2  | [10,10] |
| chr3:121982782  | GTF2E1  | coding_exon |                                                                                      | + | TtoC | 0.1    | 0.1    | 2  | 2  | [10,10] |
| chr8:30630513   | GTF2E2  | coding_exon | ENST00000355904:StoP;                                                                | - | TtoC | 0.1    | 0.1364 | 9  | 2  | [22,41] |
| chr8:30584177   | GTF2E2  | coding_exon |                                                                                      | - | TtoC | 0.1    | 0.1071 | 9  | 3  | [10,30] |
| chr8:30555647   | GTF2E2  | UTR3        |                                                                                      | - | TtoA | 0.1111 | 0.1818 | 3  | 2  | [11,18] |
| chr13:44755819  | GTF2F2  | UTR3        |                                                                                      | + | TtoC | 0.1    | 0.125  | 4  | 3  | [10,32] |
| chr11:18319431  | GTF2H1  | mixed       |                                                                                      | + | GtoA | 0.1    | 0.1    | 2  | 2  | [10,20] |
| chr11:18330044  | GTF2H1  | mixed       |                                                                                      | + | AtaG | 0.1    | 0.1538 | 4  | 2  | [10,13] |
| chr12:122706323 | GTF2H3  | coding_exon | ENST00000228955:QtoL;                                                                | + | AtoT | 0.1    | 0.1    | 2  | 2  | [10,10] |
| chr13:26907824  | GTF3A   | mixed       |                                                                                      | + | AtaG | 0.1071 | 0.125  | 7  | 2  | [16,30] |
| chr16:27421714  | GTF3C1  | coding_exon | ENST00000170629:VtoA;ENST00000356183:VtoA;                                           | - | TtoC | 0.1    | 0.1176 | 5  | 3  | [10,20] |
| chr16:27425741  | GTF3C1  | coding_exon | ENST00000170629:StoP;ENST00000356183:StoP;                                           | - | TtoC | 0.1    | 0.2667 | 6  | 4  | [10,15] |
| chr16:27456649  | GTF3C1  | coding_exon | ENST00000170629:QtoK;ENST00000356183:QtoK;                                           | - | CtoA | 0.1    | 0.1818 | 2  | 2  | [10,11] |
| chr16:27380264  | GTF3C1  | coding_exon | ENST00000170629:MtoV;ENST00000356183:MtoV;                                           | - | AtaG | 0.1    | 0.1176 | 2  | 2  | [10,17] |
| chr16:27456740  | GTF3C1  | coding_exon |                                                                                      | - | TtoC | 0.1    | 0.1    | 4  | 3  | [10,10] |
| chr2:197337450  | GTF3C3  | UTR3        |                                                                                      | - | TtoC | 0.1    | 0.125  | 4  | 3  | [10,18] |
| chr9:134554475  | GTF3C4  | UTR3        |                                                                                      | + | TtoC | 0.1    | 0.1111 | 3  | 3  | [10,10] |



|                |           |             |                                                                        |   |      |        |        |    |    |             |
|----------------|-----------|-------------|------------------------------------------------------------------------|---|------|--------|--------|----|----|-------------|
| chr9:35802964  | HINT2     | UTR3        |                                                                        | - | TtoC | 0.1    | 0.2    | 9  | 5  | [10,45]     |
| chr1:114319824 | HIPK1     | UTR3        |                                                                        | + | TtoC | 0.1    | 0.1    | 3  | 2  | [10,10]     |
| chr7:139062552 | HIPK2     | coding_exon | ENST00000263551:DtoE;ENST00000342645:DtoE;ENST00000406875:DtoE;ENST000 | - | TtoG | 0.1053 | 0.1429 | 5  | 2  | [14,19]     |
| chr7:138949714 | HIPK2     | coding_exon |                                                                        | - | AtoC | 0.1    | 0.1    | 2  | 2  | [10,10]     |
| chr7:138902088 | HIPK2     | UTR3        |                                                                        | - | TtoC | 0.1154 | 0.125  | 6  | 2  | [16,26]     |
| chr7:138902248 | HIPK2     | UTR3        |                                                                        | - | CtoT | 0.1    | 0.3    | 7  | 2  | [10,10]     |
| chr11:33265575 | HIPK3     | coding_exon | ENST00000303296:StoP;ENST00000379016:StoP;ENST00000456517:StoP;        | + | TtoC | 0.1    | 0.1111 | 3  | 3  | [10,19]     |
| chr11:33335107 | HIPK3     | UTR3        |                                                                        | + | TtoC | 0.1    | 0.2143 | 3  | 2  | [10,14]     |
| chr6:26164406  | HIST1H1C  | mixed       |                                                                        | - | AtoC | 0.1    | 0.1775 | 12 | 7  | [10,231]    |
| chr6:26246261  | HIST1H2AC | mixed       |                                                                        | + | GtoA | 0.1    | 0.1333 | 3  | 2  | [10,15]     |
| chr6:26212488  | HIST1H4C  | mixed       |                                                                        | + | TtoC | 0.1    | 0.1923 | 4  | 4  | [10,26]     |
| chr6:26313114  | HIST1H4E  | mixed       |                                                                        | + | TtoG | 0.1    | 0.1    | 2  | 2  | [10,10]     |
| chr6:12271726  | HIVEP1    | coding_exon |                                                                        | + | TtoC | 0.1    | 0.1176 | 3  | 2  | [10,17]     |
| chr1:41822998  | HIVEP3    | coding_exon |                                                                        | - | CtoA | 0.1    | 0.1    | 2  | 2  | [10,10]     |
| chr10:70773697 | HK1       | mixed       |                                                                        | + | AtoC | 0.1    | 0.1111 | 7  | 2  | [10,27]     |
| chr10:70831169 | HK1       | UTR3        |                                                                        | + | AtoG | 0.1176 | 0.127  | 4  | 2  | [66,70]     |
| chr10:70831629 | HK1       | UTR3        |                                                                        | + | TtoA | 0.1667 | 0.4545 | 8  | 6  | [11,22]     |
| chr10:70831630 | HK1       | UTR3        |                                                                        | + | TtoG | 0.1304 | 0.3333 | 7  | 4  | [14,23]     |
| chr2:74954504  | HK2       | coding_exon | ENST00000290573:VtoG;ENST00000409174:VtoG;                             | + | TtoG | 0.2    | 0.4286 | 4  | 2  | [10,21]     |
| chr6:31432278  | HLA-B     | coding_exon | ENST00000428231:QtoR;                                                  | - | AtoG | 0.102  | 0.1667 | 5  | 3  | [49,54]     |
| chr6:31432274  | HLA-B     | coding_exon | ENST00000428231:LtoF;                                                  | - | GtoT | 0.16   | 0.3455 | 7  | 7  | [25,66]     |
| chr6:31431286  | HLA-B     | coding_exon | ENST00000412585:WtoR;ENST00000428231:WtoR;                             | - | TtoC | 0.1    | 0.1475 | 6  | 3  | [19,67]     |
| chr6:31431284  | HLA-B     | coding_exon | ENST00000412585:Wto*;ENST00000428231:Wto*;                             | - | GtoA | 0.1325 | 0.625  | 6  | 6  | [19,147]    |
| chr6:31432015  | HLA-B     | coding_exon | ENST00000412585:VtoE;ENST00000428231:VtoE;                             | - | TtoA | 0.8008 | 0.922  | 3  | 2  | [141,532]   |
| chr6:31431241  | HLA-B     | coding_exon | ENST00000412585:RtoW;ENST00000428231:RtoW;                             | - | CtoT | 0.1234 | 0.1633 | 3  | 2  | [1049,2558] |
| chr6:31431283  | HLA-B     | coding_exon | ENST00000412585:AtoT;ENST00000428231:AtoT;                             | - | GtoA | 0.16   | 0.2667 | 4  | 3  | [14,52]     |
| chr6:31431282  | HLA-B     | coding_exon | ENST00000412585:AtoD;ENST00000428231:AtoD;                             | - | CtoA | 0.1111 | 0.155  | 3  | 2  | [76,140]    |
| chr6:31431233  | HLA-B     | coding_exon |                                                                        | - | CtoG | 0.1071 | 0.1422 | 4  | 2  | [1672,4098] |
| chr6:31432056  | HLA-B     | coding_exon |                                                                        | - | CtoG | 0.9596 | 0.9745 | 2  | 2  | [204,676]   |
| chr6:31429628  | HLA-B     | UTR3        |                                                                        | - | AtoG | 0.1127 | 0.2    | 3  | 2  | [10,71]     |
| chr6:31429630  | HLA-B     | UTR3        |                                                                        | - | GtoA | 0.1111 | 0.5833 | 5  | 5  | [12,54]     |
| chr6:31429631  | HLA-B     | UTR3        |                                                                        | - | AtoG | 0.2174 | 0.2667 | 7  | 4  | [15,46]     |
| chr6:31429634  | HLA-B     | UTR3        |                                                                        | - | TtoC | 0.1184 | 0.3636 | 7  | 6  | [25,77]     |
| chr6:31429636  | HLA-B     | UTR3        |                                                                        | - | CtoA | 0.1522 | 0.1818 | 6  | 3  | [48,110]    |
| chr6:31429637  | HLA-B     | UTR3        |                                                                        | - | CtoG | 0.1053 | 0.1633 | 4  | 3  | [51,119]    |
| chr6:31429638  | HLA-B     | UTR3        |                                                                        | - | AtoT | 0.125  | 0.125  | 7  | 2  | [32,68]     |
| chr6:31429643  | HLA-B     | UTR3        |                                                                        | - | TtoC | 0.1163 | 0.2283 | 10 | 6  | [73,262]    |
| chr6:31429665  | HLA-B     | UTR3        |                                                                        | - | TtoG | 0.1682 | 0.2069 | 5  | 2  | [320,422]   |
| chr6:31429782  | HLA-B     | UTR3        |                                                                        | - | CtoT | 0.1489 | 0.1707 | 3  | 2  | [2443,3068] |
| chr6:31429972  | HLA-B     | UTR3        |                                                                        | - | TtoG | 0.1009 | 0.125  | 8  | 2  | [115,170]   |
| chr6:31432920  | HLA-B     | UTR5        |                                                                        | - | GtoT | 0.1975 | 0.2012 | 2  | 2  | [159,165]   |
| chr6:31345285  | HLA-C     | coding_exon | ENST00000383329:TtoS;                                                  | - | AtoT | 0.25   | 0.5588 | 6  | 4  | [16,44]     |
| chr6:31345287  | HLA-C     | coding_exon | ENST00000383329:PtoL;                                                  | - | CtoT | 0.15   | 0.5    | 7  | 5  | [15,53]     |
| chr6:31346177  | HLA-C     | coding_exon | ENST00000376228:Wto*;ENST00000383329:Wto*;ENST00000396254:Wto*;        | - | GtoA | 0.1    | 0.15   | 2  | 2  | [10,20]     |
| chr6:31347755  | HLA-C     | coding_exon | ENST00000376228:CtoG;ENST00000383329:CtoG;ENST00000396254:CtoG;        | - | TtoG | 0.1299 | 0.1691 | 2  | 2  | [308,337]   |
| chr6:31345298  | HLA-C     | coding_exon |                                                                        | - | GtoA | 0.1111 | 0.3846 | 3  | 3  | [13,21]     |
| chr6:31344507  | HLA-C     | UTR3        |                                                                        | - | GtoA | 0.25   | 0.3125 | 3  | 2  | [12,16]     |
| chr6:31344508  | HLA-C     | UTR3        |                                                                        | - | AtoG | 0.1    | 0.2    | 3  | 2  | [10,15]     |
| chr6:31344509  | HLA-C     | UTR3        |                                                                        | - | CtoA | 0.1176 | 0.125  | 4  | 2  | [16,17]     |
| chr6:31344511  | HLA-C     | UTR3        |                                                                        | - | TtoC | 0.12   | 0.2857 | 6  | 5  | [14,25]     |
| chr6:31344520  | HLA-C     | UTR3        |                                                                        | - | TtoC | 0.1111 | 0.2857 | 11 | 5  | [14,48]     |
| chr6:31344701  | HLA-C     | UTR3        |                                                                        | - | GtoA | 0.151  | 0.3262 | 2  | 2  | [615,1151]  |
| chr6:31344751  | HLA-C     | UTR3        |                                                                        | - | CtoT | 0.1363 | 0.1592 | 6  | 3  | [1921,2632] |
| chr6:31344805  | HLA-C     | UTR3        |                                                                        | - | AtoC | 0.3576 | 0.4191 | 2  | 2  | [1430,3239] |
| chr6:33024526  | HLA-DMA   | UTR3        |                                                                        | - | GtoA | 0.1176 | 0.1333 | 6  | 2  | [15,17]     |
| chr6:33028847  | HLA-DMA   | UTR5        |                                                                        | - | TtoC | 0.1    | 0.1111 | 6  | 2  | [10,18]     |
| chr6:33028848  | HLA-DMA   | UTR5        |                                                                        | - | TtoC | 0.1    | 0.1818 | 6  | 3  | [10,22]     |
| chr6:33028849  | HLA-DMA   | UTR5        |                                                                        | - | GtoT | 0.2    | 0.2    | 3  | 2  | [10,11]     |
| chr6:33024389  | HLA-DMB   | mixed       |                                                                        | - | TtoA | 0.1818 | 0.3846 | 9  | 6  | [11,54]     |
| chr6:33010392  | HLA-DMB   | UTR3        |                                                                        | - | AtoG | 0.1667 | 0.2727 | 4  | 2  | [12,23]     |
| chr6:33010396  | HLA-DMB   | UTR3        |                                                                        | - | TtoC | 0.1111 | 0.2727 | 13 | 6  | [11,18]     |
| chr6:33079973  | HLA-DOA   | UTR3        |                                                                        | - | TtoA | 0.1818 | 0.2    | 2  | 2  | [10,23]     |
| chr6:33081833  | HLA-DOA   | UTR3        |                                                                        | - | TtoC | 0.1111 | 0.1481 | 2  | 2  | [27,27]     |
| chr6:33081964  | HLA-DOA   | UTR3        |                                                                        | - | TtoC | 0.1579 | 0.4545 | 6  | 3  | [11,19]     |
| chr6:33160714  | HLA-DPB1  | coding_exon | ENST00000418931:RtoK;ENST00000422592:RtoK;                             | + | GtoA | 0.144  | 0.1915 | 3  | 3  | [113,705]   |
| chr6:33160936  | HLA-DPB1  | coding_exon | ENST00000411942:TtoL;ENST00000418931:TtoL;ENST00000422592:TtoL;        | + | CtoT | 0.5155 | 0.6195 | 2  | 2  | [259,1253]  |
| chr6:33156435  | HLA-DPB1  | coding_exon | ENST00000411942:LtoV;ENST00000418931:LtoV;ENST00000422592:LtoV;        | + | CtoG | 0.1119 | 0.1393 | 3  | 3  | [280,412]   |
| chr6:33156606  | HLA-DPB1  | coding_exon | ENST00000411942:ItoL;ENST00000418931:ItoL;ENST00000422592:ItoL;        | + | AtoC | 0.1143 | 0.3487 | 2  | 2  | [565,1928]  |
| chr6:33156577  | HLA-DPB1  | coding_exon | ENST00000411942:AtoD;ENST00000418931:AtoD;ENST00000422592:AtoD;        | + | CtoA | 0.1731 | 0.4013 | 3  | 2  | [209,2879]  |
| chr6:33159732  | HLA-DPB1  | coding_exon |                                                                        | + | TtoA | 0.1    | 0.1818 | 4  | 2  | [10,11]     |
| chr6:33160721  | HLA-DPB1  | coding_exon |                                                                        | + | TtoC | 0.2517 | 0.2979 | 2  | 2  | [143,483]   |
| chr6:33160928  | HLA-DPB1  | coding_exon |                                                                        | + | TtoC | 0.5786 | 0.6254 | 2  | 2  | [280,1198]  |
| chr6:33162303  | HLA-DPB1  | UTR3        |                                                                        | + | GtoC | 0.3666 | 0.3918 | 2  | 2  | [486,974]   |
| chr6:33162309  | HLA-DPB1  | UTR3        |                                                                        | + | TtoC | 0.2974 | 0.305  | 2  | 2  | [436,850]   |
| chr6:33162523  | HLA-DPB1  | UTR3        |                                                                        | + | AtoG | 0.1    | 0.1915 | 22 | 15 | [30,156]    |
| chr6:33162525  | HLA-DPB1  | UTR3        |                                                                        | + | CtoA | 0.1    | 0.2206 | 16 | 8  | [30,93]     |
| chr6:33162713  | HLA-DPB1  | UTR3        |                                                                        | + | CtoA | 0.1    | 0.1176 | 2  | 2  | [11,17]     |
| chr6:32718368  | HLA-DQA1  | coding_exon | ENST00000343139:PtoL;ENST00000374949:PtoL;ENST00000395363:PtoL;ENST000 | + | CtoT | 0.1515 | 0.3    | 4  | 2  | [10,33]     |
| chr6:32717985  | HLA-DQA1  | coding_exon | ENST00000343139:DtoA;ENST00000374949:DtoA;ENST00000395363:DtoA;ENST000 | + | AtoC | 0.1    | 0.125  | 7  | 4  | [10,27]     |
| chr6:32717704  | HLA-DQA1  | coding_exon |                                                                        | + | CtoT | 0.25   | 0.25   | 2  | 2  | [12,24]     |
| chr6:32718513  | HLA-DQA1  | coding_exon |                                                                        | + | AtoC | 0.1338 | 0.492  | 5  | 5  | [412,1249]  |
| chr6:32718773  | HLA-DQA1  | UTR3        |                                                                        | + | GtoC | 0.125  | 0.2716 | 3  | 2  | [81,354]    |
| chr6:32718997  | HLA-DQA1  | UTR3        |                                                                        | + | AtoG | 0.1    | 0.2647 | 7  | 6  | [10,34]     |
| chr6:32719177  | HLA-DQA1  | UTR3        |                                                                        | + | TtoA | 0.1754 | 0.4706 | 3  | 3  | [13,57]     |
| chr6:32820977  | HLA-DQA2  | coding_exon | ENST00000374940:TtoS;                                                  | + | CtoG | 0.994  | 1      | 3  | 3  | [184,336]   |
| chr6:32821022  | HLA-DQA2  | coding_exon | ENST00000374940:TtoR;                                                  | + | CtoG | 0.9966 | 1      | 5  | 5  | [102,588]   |
| chr6:32821707  | HLA-DQA2  | coding_exon | ENST00000374940:StoP;                                                  | + | TtoC | 0.1    | 0.25   | 3  | 2  | [10,12]     |
| chr6:32822142  | HLA-DQA2  | coding_exon | ENST00000374940:LtoP;                                                  | + | TtoC | 1      | 1      | 3  | 3  | [11,164]    |
| chr6:32822009  | HLA-DQA2  | coding_exon | ENST00000374940:AtoT;                                                  | + | GtoA | 0.9845 | 1      | 5  | 5  | [68,129]    |
| chr6:32817258  | HLA-DQA2  | coding_exon |                                                                        | + | CtoT | 1      | 1      | 2  | 2  | [19,40]     |
| chr6:32820969  | HLA-DQA2  | coding_exon |                                                                        | + | CtoG | 0.9936 | 1      | 3  | 3  | [101,156]   |
| chr6:32821026  | HLA-DQA2  | coding_exon |                                                                        | + | AtoG | 0.9545 | 1      | 5  | 5  | [88,482]    |
| chr6:32821805  | HLA-DQA2  | coding_exon |                                                                        | + | CtoT | 1      | 1      | 2  | 2  | [228,610]   |
| chr6:32822011  | HLA-DQA2  | coding_exon |                                                                        | + | CtoA | 0.9688 | 1      | 5  | 5  | [10,64]     |
| chr6:32822053  | HLA-DQA2  | coding_exon |                                                                        | + | GtoA | 0.4184 | 0.8305 | 2  | 2  | [98,118]    |
| chr6:32822146  | HLA-DQA2  | coding_exon |                                                                        | + | AtoG | 1      | 1      | 3  | 3  | [72,162]    |





|                 |           |             |                                                                                      |   |      |        |        |    |    |           |
|-----------------|-----------|-------------|--------------------------------------------------------------------------------------|---|------|--------|--------|----|----|-----------|
| chr5:162851186  | HMMR      | UTR3        |                                                                                      | + | TtoC | 0.1    | 0.1176 | 4  | 2  | [17,20]   |
| chr16:4499897   | HMOX2     | UTR3        |                                                                                      | + | AtoG | 0.1    | 0.1    | 3  | 2  | [10,10]   |
| chr17:70643681  | HN1       | UTR3        |                                                                                      | - | TtoG | 0.1111 | 0.2    | 6  | 2  | [11,18]   |
| chr17:70643687  | HN1       | UTR3        |                                                                                      | - | AtoG | 0.1034 | 0.1538 | 3  | 2  | [13,29]   |
| chr17:70643688  | HN1       | UTR3        |                                                                                      | - | GtoA | 0.1    | 0.12   | 2  | 2  | [25,30]   |
| chr16:1689356   | HN1L      | UTR3        |                                                                                      | + | AtoC | 0.1176 | 0.16   | 9  | 3  | [25,51]   |
| chr16:1689541   | HN1L      | UTR3        |                                                                                      | + | TtoC | 0.1489 | 0.1765 | 8  | 2  | [17,47]   |
| chr16:1691541   | HN1L      | UTR3        |                                                                                      | + | AtoG | 0.1    | 0.1    | 2  | 2  | [10,10]   |
| chr16:1691627   | HN1L      | UTR3        |                                                                                      | + | GtoT | 0.1    | 0.2    | 2  | 2  | [10,10]   |
| chr17:33167852  | HNF1B     | coding_exon | ENST00000225893:PtoR;ENST00000427275:PtoR;                                           | - | CtoG | 0.1429 | 0.1818 | 3  | 2  | [11,14]   |
| chr17:33167921  | HNF1B     | coding_exon | ENST00000225893:NtoS;ENST00000427275:NtoS;                                           | - | AtoG | 0.1111 | 0.1364 | 6  | 2  | [18,22]   |
| chr17:33167850  | HNF1B     | coding_exon | ENST00000225893:EtoQ;ENST00000427275:EtoQ;                                           | - | GtoC | 0.1111 | 0.2    | 4  | 3  | [10,18]   |
| chr17:33167926  | HNF1B     | coding_exon |                                                                                      | - | AtoG | 0.1154 | 0.3333 | 7  | 5  | [11,26]   |
| chr5:137115700  | HNRNPA0   | mixed       |                                                                                      | - | CtoT | 0.1    | 0.1    | 3  | 2  | [10,20]   |
| chr5:137116262  | HNRNPA0   | mixed       |                                                                                      | - | AtoG | 0.1296 | 0.1818 | 3  | 2  | [33,59]   |
| chr12:52961437  | HNRNPA1P2 | coding_exon | ENST00000330752:StoT;ENST00000340913:StoT;ENST00000420780:StoT;                      | + | TtoA | 0.1053 | 0.1765 | 6  | 3  | [17,38]   |
| chr12:52960869  | HNRNPA1P2 | coding_exon | ENST00000330752:Sto*;ENST00000340913:Sto*;ENST00000420780:Sto*;                      | + | CtoG | 0.1034 | 0.186  | 9  | 4  | [15,149]  |
| chr12:52962536  | HNRNPA1P2 | coding_exon | ENST00000330752:RtoS;ENST00000340913:RtoS;ENST00000420780:RtoS;                      | + | AtoC | 0.1159 | 0.2105 | 15 | 5  | [20,73]   |
| chr12:52963863  | HNRNPA1P2 | coding_exon | ENST00000330752:GtoV;ENST00000340913:GtoV;                                           | + | GtoT | 0.1    | 0.1    | 2  | 2  | [10,10]   |
| chr12:52962537  | HNRNPA1P2 | coding_exon | ENST00000330752:GtoC;ENST00000340913:GtoC;ENST00000420780:GtoC;                      | + | GtoT | 0.1059 | 0.5161 | 18 | 15 | [31,201]  |
| chr12:52962527  | HNRNPA1P2 | coding_exon |                                                                                      | + | CtoT | 0.1    | 0.1    | 3  | 2  | [10,10]   |
| chr12:52962664  | HNRNPA1P2 | coding_exon |                                                                                      | + | TtoG | 0.1088 | 0.1813 | 8  | 5  | [158,257] |
| chr12:52960818  | HNRNPA1P2 | UTR5        |                                                                                      | + | GtoC | 0.1    | 0.1385 | 4  | 2  | [50,65]   |
| chr7:26196858   | HNRNPA2B1 | UTR3        |                                                                                      | - | TtoC | 0.1    | 0.2    | 3  | 2  | [10,10]   |
| chr7:26196960   | HNRNPA2B1 | UTR3        |                                                                                      | - | TtoC | 0.1111 | 0.1818 | 5  | 2  | [11,18]   |
| chr7:26197850   | HNRNPA2B1 | UTR3        |                                                                                      | - | TtoA | 0.1304 | 0.1429 | 3  | 2  | [14,23]   |
| chr7:26198027   | HNRNPA2B1 | UTR3        |                                                                                      | - | TtoC | 0.125  | 0.1429 | 10 | 3  | [25,110]  |
| chr2:177790723  | HNRNPA3   | coding_exon | ENST00000392524:YtoH;ENST00000411529:YtoH;ENST00000416446:YtoH;ENST00000412538:YtoH; | + | TtoC | 0.1    | 0.1    | 3  | 2  | [10,10]   |
| chr2:177789516  | HNRNPA3   | coding_exon | ENST00000392524:VtoG;ENST00000411529:VtoG;ENST00000412538:VtoG;ENST00000412538:VtoG; | + | TtoG | 0.15   | 0.2    | 5  | 2  | [10,20]   |
| chr2:177789664  | HNRNPA3   | coding_exon | ENST00000392524:StoP;ENST00000411529:StoP;ENST00000412538:StoP;ENST00000412538:StoP; | + | TtoC | 0.1    | 0.1    | 5  | 2  | [10,10]   |
| chr2:177790739  | HNRNPA3   | coding_exon | ENST00000392524:PtoR;ENST00000411529:PtoR;ENST00000416446:PtoR;ENST00000412538:PtoR; | + | CtoG | 0.1    | 0.1    | 3  | 2  | [10,10]   |
| chr2:177789518  | HNRNPA3   | coding_exon | ENST00000392524:KtoE;ENST00000411529:KtoE;ENST00000412538:KtoE;ENST00000412538:KtoE; | + | AtoG | 0.1    | 0.25   | 6  | 2  | [20,20]   |
| chr2:177789554  | HNRNPA3   | coding_exon | ENST00000392524:GtoR;ENST00000411529:GtoR;ENST00000412538:GtoR;ENST00000412538:GtoR; | + | GtoC | 0.1053 | 0.1429 | 11 | 3  | [21,46]   |
| chr2:177789651  | HNRNPA3   | coding_exon |                                                                                      | + | TtoC | 0.1143 | 0.1538 | 7  | 3  | [13,36]   |
| chr2:177789654  | HNRNPA3   | coding_exon |                                                                                      | + | TtoC | 0.1    | 0.2    | 12 | 5  | [11,21]   |
| chr2:177790695  | HNRNPA3   | coding_exon |                                                                                      | + | TtoG | 0.1271 | 0.3017 | 8  | 4  | [93,144]  |
| chr2:177790704  | HNRNPA3   | coding_exon |                                                                                      | + | TtoC | 0.1034 | 0.1379 | 7  | 2  | [29,29]   |
| chr2:177790722  | HNRNPA3   | coding_exon |                                                                                      | + | CtoG | 0.1    | 0.1875 | 4  | 2  | [10,16]   |
| chr2:177790737  | HNRNPA3   | coding_exon |                                                                                      | + | AtoT | 0.1    | 0.1818 | 7  | 2  | [10,12]   |
| chr14:20771963  | HNRNPC    | coding_exon | ENST00000320084:GtoV;ENST00000336053:GtoV;ENST00000420743:GtoV;ENST00000420743:GtoV; | - | GtoT | 0.122  | 0.14   | 5  | 3  | [39,50]   |
| chr14:20750982  | HNRNPC    | coding_exon | ENST00000216296:RtoQ;ENST00000320084:RtoQ;ENST00000336053:RtoQ;ENST00000336053:RtoQ; | - | GtoA | 0.1    | 0.1667 | 17 | 7  | [40,104]  |
| chr14:20750979  | HNRNPC    | coding_exon | ENST00000216296:GtoE;ENST00000320084:GtoE;ENST00000336053:GtoE;ENST00000336053:GtoE; | - | GtoA | 0.1    | 0.25   | 14 | 6  | [31,55]   |
| chr14:20750975  | HNRNPC    | coding_exon |                                                                                      | - | TtoG | 0.1    | 0.1053 | 4  | 2  | [19,20]   |
| chr14:20750978  | HNRNPC    | coding_exon |                                                                                      | - | AtoG | 0.122  | 0.1509 | 9  | 2  | [41,58]   |
| chr14:20750981  | HNRNPC    | coding_exon |                                                                                      | - | GtoA | 0.1552 | 0.1842 | 14 | 2  | [39,59]   |
| chr14:20771965  | HNRNPC    | coding_exon |                                                                                      | - | TtoC | 0.1053 | 0.1538 | 13 | 7  | [21,57]   |
| chr4:83494040   | HNRNPD    | UTR3        |                                                                                      | - | TtoA | 0.1    | 0.3    | 9  | 4  | [10,20]   |
| chr4:83494212   | HNRNPD    | UTR3        |                                                                                      | - | TtoC | 0.1014 | 0.1268 | 9  | 5  | [57,143]  |
| chr5:178974419  | HNRNPH1   | UTR3        |                                                                                      | - | TtoC | 0.1148 | 0.1333 | 5  | 2  | [15,61]   |
| chr10:69767653  | HNRNPH3   | coding_exon | ENST00000265866:TtoP;ENST00000354695:TtoP;                                           | + | AtoC | 0.1129 | 0.1746 | 11 | 2  | [124,126] |
| chr10:69767594  | HNRNPH3   | coding_exon |                                                                                      | + | AtoC | 0.1    | 0.2    | 2  | 2  | [10,10]   |
| chr10:69767617  | HNRNPH3   | coding_exon |                                                                                      | + | AtoG | 0.4545 | 0.75   | 11 | 11 | [11,35]   |
| chr10:69771860  | HNRNPH3   | UTR3        |                                                                                      | + | TtoC | 0.1053 | 0.1538 | 8  | 2  | [13,19]   |
| chr19:44028133  | HNRNPL    | coding_exon | ENST00000221419:VtoG;ENST00000388749:VtoG;ENST00000388750:VtoG;ENST00000388750:VtoG; | - | TtoG | 0.1    | 0.1818 | 5  | 2  | [11,11]   |
| chr19:44021073  | HNRNPL    | coding_exon | ENST00000221419:StoF;ENST00000388749:StoF;ENST00000388750:StoF;ENST00000388750:StoF; | - | CtoT | 0.1053 | 0.1333 | 6  | 3  | [15,28]   |
| chr19:44026546  | HNRNPL    | coding_exon | ENST00000221419:StoC;ENST00000388749:StoC;ENST00000388750:StoC;ENST00000388750:StoC; | - | CtoG | 0.1111 | 0.1818 | 3  | 2  | [10,12]   |
| chr19:44028541  | HNRNPL    | coding_exon | ENST00000221419:QtoR;ENST00000388749:QtoR;ENST00000388750:QtoR;ENST00000388750:QtoR; | - | AtoG | 0.1    | 0.1    | 3  | 2  | [10,11]   |
| chr19:44021390  | HNRNPL    | coding_exon | ENST00000221419:QtoK;ENST00000388749:QtoK;ENST00000388750:QtoK;ENST00000388750:QtoK; | - | CtoA | 0.2    | 0.2    | 2  | 2  | [10,10]   |
| chr19:44028151  | HNRNPL    | coding_exon | ENST00000221419:NtoT;ENST00000388749:NtoT;ENST00000388750:NtoT;ENST00000388750:NtoT; | - | AtoC | 0.1    | 0.1    | 4  | 2  | [10,10]   |
| chr19:44020924  | HNRNPL    | coding_exon | ENST00000221419:HtoN;ENST00000388749:HtoN;ENST00000388750:HtoN;ENST00000388750:HtoN; | - | CtoA | 0.1    | 0.1333 | 2  | 2  | [10,15]   |
| chr19:44026579  | HNRNPL    | coding_exon | ENST00000221419:DtoV;ENST00000388749:DtoV;ENST00000388750:DtoV;ENST00000388750:DtoV; | - | AtoT | 0.1818 | 0.25   | 3  | 2  | [11,12]   |
| chr19:44026580  | HNRNPL    | coding_exon | ENST00000221419:DtoH;ENST00000388749:DtoH;ENST00000388750:DtoH;ENST00000388750:DtoH; | - | GtoC | 0.1667 | 0.2    | 3  | 2  | [10,12]   |
| chr19:44026556  | HNRNPL    | coding_exon | ENST00000221419:AtoT;ENST00000388749:AtoT;ENST00000388750:AtoT;ENST00000388750:AtoT; | - | GtoA | 0.1    | 0.1818 | 3  | 2  | [10,11]   |
| chr19:44026555  | HNRNPL    | coding_exon | ENST00000221419:AtoG;ENST00000388749:AtoG;ENST00000388750:AtoG;ENST00000388750:AtoG; | - | CtoG | 0.1    | 0.2    | 3  | 2  | [10,10]   |
| chr19:44020102  | HNRNPL    | coding_exon |                                                                                      | - | AtoG | 0.1296 | 0.1905 | 8  | 2  | [54,70]   |
| chr19:44021024  | HNRNPL    | coding_exon |                                                                                      | - | GtoA | 0.1111 | 0.2353 | 5  | 4  | [18,35]   |
| chr19:44026491  | HNRNPL    | coding_exon |                                                                                      | - | AtoG | 0.1538 | 0.4167 | 10 | 7  | [10,17]   |
| chr19:44029800  | HNRNPL    | mixed       |                                                                                      | - | AtoG | 0.1    | 0.4    | 9  | 4  | [10,23]   |
| chr19:44019142  | HNRNPL    | UTR3        |                                                                                      | - | TtoA | 0.1053 | 0.1667 | 13 | 5  | [16,58]   |
| chr19:44019143  | HNRNPL    | UTR3        |                                                                                      | - | AtoG | 0.1053 | 0.1711 | 7  | 5  | [16,84]   |
| chr1:243085469  | HNRNPU    | coding_exon |                                                                                      | - | AtoG | 0.1133 | 0.1633 | 2  | 2  | [346,459] |
| chr1:243085472  | HNRNPU    | coding_exon |                                                                                      | - | TtoG | 0.1143 | 0.1297 | 7  | 2  | [191,459] |
| chr19:46492379  | HNRNPUL1  | coding_exon | ENST00000263367:NtoT;ENST00000352456:NtoT;ENST00000378215:NtoT;ENST00000378215:NtoT; | + | AtoC | 0.1154 | 0.1231 | 4  | 2  | [26,65]   |
| chr19:46505339  | HNRNPUL1  | UTR3        |                                                                                      | + | CtoA | 0.1    | 0.1    | 5  | 3  | [10,10]   |
| chr19:46505340  | HNRNPUL1  | UTR3        |                                                                                      | + | TtoA | 0.1    | 0.1026 | 3  | 2  | [10,39]   |
| chr11:62238821  | HNRNPUL2  | UTR3        |                                                                                      | - | TtoA | 0.1    | 0.1064 | 3  | 2  | [30,48]   |
| chr4:83566704   | HNRPDL    | coding_exon |                                                                                      | - | AtoG | 0.1069 | 0.1111 | 2  | 2  | [108,132] |
| chr5:78704985   | HOMER1    | UTR3        |                                                                                      | - | GtoT | 0.4444 | 0.8    | 4  | 4  | [10,27]   |
| chr14:22815360  | HOMEZ     | coding_exon | ENST00000357460:LtoP;                                                                | - | TtoC | 0.1538 | 0.2    | 2  | 2  | [10,13]   |
| chr14:22814368  | HOMEZ     | UTR3        |                                                                                      | - | GtoA | 0.1    | 0.1    | 3  | 2  | [10,10]   |
| chr14:22814390  | HOMEZ     | UTR3        |                                                                                      | - | TtoC | 0.1818 | 0.2    | 5  | 2  | [10,11]   |
| chr14:22814600  | HOMEZ     | UTR3        |                                                                                      | - | TtoG | 0.1    | 0.2    | 3  | 2  | [10,10]   |
| chr8:43001115   | HOOK3     | UTR3        |                                                                                      | + | AtoG | 0.1    | 0.1538 | 2  | 2  | [10,13]   |
| chr17:44009283  | HQB3      | UTR5        |                                                                                      | - | TtoG | 0.1    | 0.2    | 3  | 2  | [10,10]   |
| chr1:20943593   | HP1BP3    | UTR3        |                                                                                      | - | TtoA | 0.1    | 0.1429 | 6  | 2  | [10,15]   |
| chr2:10484784   | HPCAL1    | UTR3        |                                                                                      | + | TtoC | 0.1    | 0.1    | 2  | 2  | [10,10]   |
| chr2:10485148   | HPCAL1    | UTR3        |                                                                                      | + | TtoC | 0.1    | 0.1    | 5  | 3  | [10,10]   |
| chr1:45566577   | HPDL      | coding_exon |                                                                                      | + | AtoG | 0.1    | 0.1818 | 3  | 2  | [10,11]   |
| chr10:100185446 | HPS1      | coding_exon | ENST00000249092:KtoT;ENST00000325103:KtoT;ENST00000338546:KtoT;ENST00000338546:KtoT; | - | AtoC | 0.1    | 0.1111 | 3  | 2  | [10,18]   |
| chr10:100192899 | HPS1      | coding_exon | ENST00000249092:FtoS;ENST00000325103:FtoS;ENST00000338546:FtoS;ENST00000338546:FtoS; | - | TtoC | 0.1176 | 0.1429 | 6  | 3  | [14,17]   |
| chr10:100167122 | HPS1      | UTR3        |                                                                                      | - | AtoG | 0.1    | 0.1    | 5  | 2  | [10,20]   |
| chr3:150341831  | HPS3      | coding_exon | ENST00000296051:LtoP;ENST00000460120:LtoP;                                           | + | TtoC | 0.1    | 0.1429 | 2  | 2  | [10,14]   |
| chr22:25190014  | HPS4      | coding_exon | ENST00000336873:RtoW;ENST00000398141:RtoW;ENST00000398145:RtoW;ENST00000398145:RtoW; | - | AtoT | 0.1    | 0.1    | 3  | 2  | [10,10]   |
| chr22:25207781  | HPS4      | UTR5        |                                                                                      | - | TtoA | 0.1    | 0.1538 | 2  | 2  | [10,13]   |
| chr11:18269887  | HPS5      | coding_exon |                                                                                      | - | AtoT | 0.1    | 0.1    | 2  | 2  | [10,10]   |
| chr11:18257672  | HPS5      | UTR3        |                                                                                      | - | AtoG | 0.1    | 0.1    | 2  | 2  | [10,10]   |

|                 |          |             |                                                                                      |   |      |        |        |    |    |           |
|-----------------|----------|-------------|--------------------------------------------------------------------------------------|---|------|--------|--------|----|----|-----------|
| chr10:103816292 | HPS6     | coding_exon | ENST00000299238:EtOD;                                                                | + | AtoC | 0.1429 | 0.2    | 4  | 2  | [10,14]   |
| chr11:63082528  | HRASLS2  | coding_exon | ENST0000025695:VtoA;                                                                 | - | TtoC | 0.1    | 0.1    | 3  | 2  | [10,30]   |
| chr16:82399159  | HSBP1    | UTR5        |                                                                                      | + | AtoC | 0.1034 | 0.1134 | 4  | 2  | [29,98]   |
| chr22:2747229   | HSCB     | coding_exon | ENST00000216027:Atog;ENST00000398941:StoR;                                           | + | CtoG | 0.1    | 0.1429 | 2  | 2  | [10,14]   |
| chr19:54026737  | HSD17B14 | coding_exon | ENST00000263278:KtoN;                                                                | - | GtoC | 0.1667 | 0.1739 | 3  | 2  | [12,23]   |
| chr19:16126299  | HSH2D    | mixed       |                                                                                      | + | GtoC | 0.1053 | 0.2143 | 5  | 2  | [14,57]   |
| chr14:101620494 | HSP90AA2 | coding_exon | ENST00000216281:YtoS;ENST00000334701:YtoS;                                           | - | AtoC | 0.1    | 0.2    | 14 | 10 | [10,42]   |
| chr14:101619971 | HSP90AA2 | coding_exon | ENST00000216281:VtoA;ENST00000334701:VtoA;                                           | - | TtoC | 0.1    | 0.2143 | 7  | 4  | [14,25]   |
| chr14:101617879 | HSP90AA2 | coding_exon | ENST00000216281:TtoP;ENST00000334701:TtoP;ENST00000456274:TtoP;                      | - | AtoC | 0.1053 | 0.1111 | 9  | 2  | [27,38]   |
| chr14:101617878 | HSP90AA2 | coding_exon | ENST00000216281:TtoI;ENST00000334701:TtoI;ENST00000456274:TtoI;                      | - | CtoT | 0.1176 | 0.1818 | 8  | 2  | [11,51]   |
| chr14:101619969 | HSP90AA2 | coding_exon | ENST00000216281:KtoE;ENST00000334701:KtoE;                                           | - | Atog | 0.1333 | 0.25   | 4  | 4  | [10,15]   |
| chr14:101617892 | HSP90AA2 | coding_exon |                                                                                      | - | TtoA | 0.1042 | 0.1818 | 10 | 3  | [24,48]   |
| chr14:101617910 | HSP90AA2 | coding_exon |                                                                                      | - | TtoG | 0.1143 | 0.1379 | 12 | 2  | [29,35]   |
| chr14:101619955 | HSP90AA2 | coding_exon |                                                                                      | - | Atog | 0.1333 | 0.1429 | 3  | 2  | [14,16]   |
| chr14:101619970 | HSP90AA2 | coding_exon |                                                                                      | - | CtoT | 0.1538 | 0.3333 | 3  | 2  | [10,14]   |
| chr14:101617135 | HSP90AA2 | UTR3        |                                                                                      | - | TtoA | 0.1    | 0.3    | 8  | 4  | [10,17]   |
| chr14:101617137 | HSP90AA2 | UTR3        |                                                                                      | - | TtoA | 0.1053 | 0.3333 | 9  | 4  | [12,26]   |
| chr14:101617153 | HSP90AA2 | UTR3        |                                                                                      | - | CtoG | 0.1077 | 0.1111 | 8  | 3  | [36,65]   |
| chr14:101617521 | HSP90AA2 | UTR3        |                                                                                      | - | TtoG | 0.1091 | 0.3077 | 9  | 6  | [25,78]   |
| chr14:101617527 | HSP90AA2 | UTR3        |                                                                                      | - | TtoG | 0.1023 | 0.2093 | 11 | 10 | [18,155]  |
| chr6:44327809   | HSP90AB1 | coding_exon | ENST00000353801:YtoN;ENST00000371554:YtoN;ENST00000371646:YtoN;                      | + | TtoA | 0.1024 | 0.2773 | 13 | 11 | [33,184]  |
| chr6:44328822   | HSP90AB1 | coding_exon | ENST00000353801:WtoC;ENST00000371554:WtoC;ENST00000371646:WtoC;                      | + | GtoC | 0.125  | 0.5294 | 7  | 3  | [17,24]   |
| chr6:44327731   | HSP90AB1 | coding_exon | ENST00000353801:VtoL;ENST00000371554:VtoL;ENST00000371562:VtoL;ENST00000371646:VtoL; | + | GtoC | 0.1017 | 0.1429 | 9  | 5  | [83,178]  |
| chr6:44327783   | HSP90AB1 | coding_exon | ENST00000353801:VtoA;ENST00000371554:VtoA;ENST00000371646:VtoA;                      | + | TtoC | 0.1111 | 0.1781 | 15 | 8  | [28,205]  |
| chr6:44328823   | HSP90AB1 | coding_exon | ENST00000353801:TtoP;ENST00000371554:TtoP;ENST00000371646:TtoP;                      | + | AtoC | 0.15   | 0.7895 | 11 | 8  | [12,34]   |
| chr6:44328874   | HSP90AB1 | coding_exon | ENST00000353801:TtoA;ENST00000371554:TtoA;ENST00000371646:TtoA;                      | + | Atog | 0.1    | 0.2222 | 5  | 4  | [10,16]   |
| chr6:44328871   | HSP90AB1 | coding_exon | ENST00000353801:StoP;ENST00000371554:StoP;ENST00000371646:StoP;                      | + | TtoC | 0.1538 | 0.3077 | 4  | 3  | [13,14]   |
| chr6:44327731   | HSP90AB1 | coding_exon | ENST00000353801:StoI;ENST00000371554:StoI;ENST00000371562:StoI;ENST00000371646:StoI; | + | GtoT | 0.1111 | 0.1194 | 8  | 2  | [18,68]   |
| chr6:44327730   | HSP90AB1 | coding_exon | ENST00000353801:QtoH;ENST00000371554:QtoH;ENST00000371562:QtoH;ENST00000371646:QtoH; | + | GtoT | 0.1043 | 0.1728 | 13 | 5  | [81,176]  |
| chr6:44328869   | HSP90AB1 | coding_exon | ENST00000353801:NtoI;ENST00000371554:NtoI;ENST00000371646:NtoI;                      | + | AtoT | 0.15   | 0.1724 | 7  | 3  | [18,29]   |
| chr6:44327737   | HSP90AB1 | coding_exon | ENST00000353801:NtoD;ENST00000371554:NtoD;ENST00000371562:NtoD;ENST00000371646:NtoD; | + | Atog | 0.1165 | 0.1176 | 13 | 2  | [102,104] |
| chr6:44328998   | HSP90AB1 | coding_exon | ENST00000353801:LtoQ;ENST00000371554:LtoQ;ENST00000371646:LtoQ;                      | + | TtoA | 0.1538 | 0.4286 | 8  | 8  | [10,22]   |
| chr6:44327939   | HSP90AB1 | coding_exon | ENST00000353801:LtoP;ENST00000371554:LtoP;ENST00000371646:LtoP;                      | + | TtoC | 0.1311 | 0.1809 | 12 | 6  | [26,101]  |
| chr6:44327960   | HSP90AB1 | coding_exon | ENST00000353801:ItoN;ENST00000371554:ItoN;ENST00000371646:ItoN;                      | + | TtoA | 0.1    | 0.1429 | 4  | 2  | [14,21]   |
| chr6:44326909   | HSP90AB1 | coding_exon | ENST00000353801:EtoD;ENST00000371554:EtoD;ENST00000371562:EtoD;ENST00000371646:EtoD; | + | GtoC | 0.1304 | 0.2353 | 8  | 4  | [16,28]   |
| chr6:44328865   | HSP90AB1 | coding_exon | ENST00000353801:DtoN;ENST00000371554:DtoN;ENST00000371646:DtoN;                      | + | GtoA | 0.129  | 0.1538 | 3  | 2  | [13,34]   |
| chr6:44328971   | HSP90AB1 | coding_exon | ENST00000353801:DtoG;ENST00000371554:DtoG;ENST00000371646:DtoG;                      | + | AtoG | 0.1    | 0.1    | 3  | 2  | [10,20]   |
| chr6:44326906   | HSP90AB1 | coding_exon | ENST00000353801:DtoE;ENST00000371554:DtoE;ENST00000371562:DtoE;ENST00000371646:DtoE; | + | TtoG | 0.1053 | 0.1429 | 5  | 2  | [14,19]   |
| chr6:44327736   | HSP90AB1 | coding_exon |                                                                                      | + | CtoA | 0.1038 | 0.1044 | 12 | 2  | [106,251] |
| chr6:44328978   | HSP90AB1 | coding_exon |                                                                                      | + | Atog | 0.5    | 0.7    | 2  | 2  | [11,17]   |
| chr6:44328990   | HSP90AB1 | coding_exon |                                                                                      | + | GtoT | 0.1    | 0.1    | 3  | 2  | [10,10]   |
| chr6:44328999   | HSP90AB1 | coding_exon |                                                                                      | + | GtoT | 0.1818 | 0.5238 | 11 | 10 | [10,25]   |
| chr6:44324385   | HSP90AB1 | mixed       |                                                                                      | + | CtoG | 0.102  | 0.2    | 8  | 4  | [10,64]   |
| chr6:44324386   | HSP90AB1 | mixed       |                                                                                      | + | TtoA | 0.1111 | 0.3462 | 12 | 9  | [19,72]   |
| chr6:44325092   | HSP90AB1 | mixed       |                                                                                      | + | GtoC | 0.12   | 0.2143 | 8  | 6  | [14,27]   |
| chr6:44325093   | HSP90AB1 | mixed       |                                                                                      | + | CtoT | 0.1429 | 0.2    | 9  | 7  | [12,22]   |
| chr6:44325098   | HSP90AB1 | mixed       |                                                                                      | + | GtoC | 0.1    | 0.16   | 7  | 4  | [19,32]   |
| chr6:44325107   | HSP90AB1 | mixed       |                                                                                      | + | CtoT | 0.1    | 0.2    | 5  | 2  | [10,10]   |
| chr6:44325129   | HSP90AB1 | mixed       |                                                                                      | + | CtoT | 0.1111 | 0.1212 | 5  | 2  | [33,36]   |
| chr6:44325149   | HSP90AB1 | mixed       |                                                                                      | + | Atog | 0.129  | 0.2667 | 8  | 5  | [10,31]   |
| chr6:44325155   | HSP90AB1 | mixed       |                                                                                      | + | CtoT | 0.15   | 0.1579 | 2  | 2  | [21,40]   |
| chr6:44325203   | HSP90AB1 | mixed       |                                                                                      | + | GtoA | 0.1    | 0.3684 | 13 | 11 | [13,44]   |
| chr6:44325205   | HSP90AB1 | mixed       |                                                                                      | + | Atog | 0.1364 | 0.28   | 17 | 12 | [11,39]   |
| chr6:44325209   | HSP90AB1 | mixed       |                                                                                      | + | Atog | 0.1    | 0.125  | 4  | 2  | [10,24]   |
| chr6:44325215   | HSP90AB1 | mixed       |                                                                                      | + | Atog | 0.1    | 0.3125 | 6  | 6  | [10,16]   |
| chr6:44325248   | HSP90AB1 | mixed       |                                                                                      | + | TtoC | 0.1429 | 0.2    | 12 | 4  | [10,24]   |
| chr6:44325250   | HSP90AB1 | mixed       |                                                                                      | + | GtoT | 0.125  | 0.1429 | 4  | 2  | [16,21]   |
| chr6:44325508   | HSP90AB1 | mixed       |                                                                                      | + | AtoT | 0.16   | 0.2    | 7  | 2  | [10,25]   |
| chr6:44325751   | HSP90AB1 | mixed       |                                                                                      | + | GtoA | 0.1026 | 0.1111 | 5  | 2  | [39,46]   |
| chr6:44325769   | HSP90AB1 | mixed       |                                                                                      | + | TtoC | 0.1071 | 0.2222 | 11 | 8  | [22,50]   |
| chr6:44325772   | HSP90AB1 | mixed       |                                                                                      | + | Atog | 0.122  | 0.3333 | 13 | 12 | [14,45]   |
| chr6:44325812   | HSP90AB1 | mixed       |                                                                                      | + | GtoA | 0.1    | 0.125  | 3  | 2  | [16,20]   |
| chr6:44325813   | HSP90AB1 | mixed       |                                                                                      | + | GtoA | 0.1    | 0.1143 | 6  | 2  | [20,38]   |
| chr6:44325816   | HSP90AB1 | mixed       |                                                                                      | + | Atog | 0.1667 | 0.1818 | 3  | 2  | [12,13]   |
| chr6:44325841   | HSP90AB1 | mixed       |                                                                                      | + | AtoT | 0.1    | 0.1875 | 8  | 5  | [10,16]   |
| chr6:44326193   | HSP90AB1 | mixed       |                                                                                      | + | AtoT | 0.1    | 0.1667 | 2  | 2  | [10,13]   |
| chr6:44326204   | HSP90AB1 | mixed       |                                                                                      | + | AtoC | 0.1111 | 0.1212 | 5  | 3  | [10,34]   |
| chr6:44326816   | HSP90AB1 | mixed       |                                                                                      | + | TtoC | 0.1    | 0.2371 | 21 | 17 | [26,180]  |
| chr6:44326822   | HSP90AB1 | mixed       |                                                                                      | + | TtoG | 0.1111 | 0.3529 | 13 | 11 | [18,94]   |
| chr6:44326846   | HSP90AB1 | mixed       |                                                                                      | + | GtoT | 0.1    | 0.1111 | 6  | 2  | [10,18]   |
| chr6:44326854   | HSP90AB1 | mixed       |                                                                                      | + | AtoT | 0.1429 | 0.2    | 3  | 2  | [10,21]   |
| chr6:44326875   | HSP90AB1 | mixed       |                                                                                      | + | TtoC | 0.1    | 0.1667 | 10 | 6  | [15,30]   |
| chr6:44322829   | HSP90AB1 | UTR5        |                                                                                      | + | CtoT | 0.1224 | 0.25   | 6  | 3  | [20,49]   |
| chr12:102861718 | HSP90B1  | coding_exon | ENST00000299767:StoA;ENST00000421266:StoA;                                           | + | TtoG | 0.125  | 0.1333 | 6  | 2  | [15,40]   |
| chr12:102864581 | HSP90B1  | coding_exon | ENST00000299767:RtoG;ENST00000421266:RtoG;                                           | + | Atog | 0.1    | 0.1    | 7  | 4  | [10,10]   |
| chr12:102861093 | HSP90B1  | coding_exon | ENST00000299767:KtoE;ENST00000421266:KtoE;                                           | + | Atog | 0.1765 | 0.2    | 2  | 2  | [10,18]   |
| chr12:102864599 | HSP90B1  | coding_exon | ENST00000299767:ItoV;ENST00000421266:ItoV;                                           | + | Atog | 0.1    | 0.1333 | 3  | 2  | [10,15]   |
| chr12:102864586 | HSP90B1  | coding_exon | ENST00000299767:DtoE;ENST00000421266:DtoE;                                           | + | CtoG | 0.1    | 0.2    | 3  | 2  | [10,11]   |
| chr12:102861072 | HSP90B1  | coding_exon | ENST00000299767:Atot;ENST00000421266:Atot;                                           | + | GtoA | 0.1    | 0.125  | 3  | 2  | [10,16]   |
| chr12:102861745 | HSP90B1  | coding_exon | ENST00000299767:Atos;ENST00000421266:Atos;                                           | + | GtoT | 0.1154 | 0.5    | 13 | 10 | [10,49]   |
| chr12:102861101 | HSP90B1  | coding_exon |                                                                                      | + | CtoT | 0.1    | 0.1818 | 6  | 3  | [11,20]   |
| chr12:102865720 | HSP90B1  | UTR3        |                                                                                      | + | TtoA | 0.1    | 0.1667 | 15 | 6  | [31,131]  |
| chr10:14928847  | HSPA14   | coding_exon |                                                                                      | + | TtoC | 0.1    | 0.1333 | 3  | 2  | [10,15]   |
| chr5:132459768  | HSPA4    | coding_exon | ENST00000304858:VtoG;                                                                | + | TtoG | 0.1111 | 0.1221 | 3  | 2  | [54,131]  |
| chr4:128973785  | HSPA4L   | UTR3        |                                                                                      | + | Atog | 0.1    | 0.1    | 2  | 2  | [10,10]   |
| chr9:127038352  | HSPA5    | UTR3        |                                                                                      | - | TtoG | 0.1    | 0.1    | 4  | 2  | [10,20]   |
| chr9:127043423  | HSPA5    | UTR5        |                                                                                      | - | AtoT | 0.1    | 0.194  | 4  | 4  | [15,68]   |
| chr5:137938981  | HSPA9    | UTR5        |                                                                                      | - | TtoC | 0.1154 | 0.1667 | 2  | 2  | [12,26]   |
| chr2:198076081  | HSPF1    | coding_exon | ENST00000233893:VtoE;ENST00000409468:VtoE;ENST00000409729:VtoE;                      | + | TtoA | 0.1    | 0.1176 | 8  | 2  | [11,17]   |
| chr2:198076074  | HSPF1    | coding_exon | ENST00000233893:TtoA;ENST00000409468:TtoA;ENST00000409729:TtoA;                      | + | Atog | 0.1    | 0.25   | 11 | 7  | [13,33]   |
| chr2:198074130  | HSPF1    | coding_exon | ENST00000233893:ItoV;ENST00000409468:ItoV;                                           | + | Atog | 0.1    | 0.1471 | 12 | 8  | [23,47]   |
| chr2:198076072  | HSPF1    | coding_exon | ENST00000233893:GtoD;ENST00000409468:GtoD;ENST00000409729:GtoD;                      | + | GtoA | 0.1081 | 0.2083 | 4  | 2  | [24,37]   |
| chr2:198076091  | HSPF1    | coding_exon | ENST00000233893:DtoE;ENST00000409468:DtoE;ENST00000409729:DtoE;                      | + | TtoA | 0.1    | 0.2    | 4  | 2  | [10,10]   |
| chr2:198074144  | HSPF1    | coding_exon |                                                                                      | + | Atog | 0.1    | 0.1    | 5  | 2  | [10,10]   |
| chr2:198074189  | HSPF1    | coding_exon |                                                                                      | + | AtoT | 0.1    | 0.1667 | 5  | 2  | [12,30]   |
| chr2:198076079  | HSPF1    | coding_exon |                                                                                      | + | Atog | 0.1053 | 0.1176 | 4  | 2  | [17,19]   |

|                 |         |             |                                                                                     |   |      |        |        |    |    |          |
|-----------------|---------|-------------|-------------------------------------------------------------------------------------|---|------|--------|--------|----|----|----------|
| chr13:30609486  | HSPH1   | coding_exon | ENST00000320027:Etov;ENST00000380405:Etov;ENST00000380406:Etov;ENST00000380407:Etov | - | AtoT | 0.1765 | 0.1818 | 2  | 2  | [11,17]  |
| chr13:30609487  | HSPH1   | coding_exon | ENST00000320027:Etov;ENST00000380405:Etov;ENST00000380406:Etov;ENST00000380407:Etov | - | GtoC | 0.1538 | 0.2    | 2  | 2  | [10,13]  |
| chr13:30608808  | HSPH1   | UTR3        |                                                                                     | - | TtoA | 0.1    | 0.1    | 4  | 2  | [10,20]  |
| chr11:20361810  | HTATIP2 | UTR3        |                                                                                     | + | TtoA | 0.1538 | 0.1667 | 5  | 2  | [12,13]  |
| chr4:3114304    | HTT     | coding_exon | ENST00000355072:YtoN;                                                               | + | TtoA | 0.1    | 0.1429 | 5  | 2  | [10,14]  |
| chr4:3070892    | HTT     | coding_exon |                                                                                     | + | TtoG | 0.1    | 0.1    | 2  | 2  | [10,10]  |
| chr4:3094415    | HTT     | coding_exon |                                                                                     | + | TtoC | 0.1    | 0.1176 | 2  | 2  | [10,17]  |
| chr4:3215368    | HTT     | UTR3        |                                                                                     | + | AtoG | 0.1    | 0.1    | 2  | 2  | [10,10]  |
| chr12:109573422 | HVCN1   | coding_exon | ENST00000356742:VtoG;                                                               | - | TtoG | 0.1053 | 0.1585 | 6  | 2  | [59,83]  |
| chr3:50309843   | HYAL3   | mixed       |                                                                                     | - | AtoG | 0.1    | 0.1    | 2  | 2  | [10,10]  |
| chr11:125269085 | HVLS1   | mixed       |                                                                                     | + | AtoG | 0.1    | 0.1667 | 3  | 2  | [10,12]  |
| chr11:118422340 | HYOU1   | coding_exon |                                                                                     | - | TtoA | 0.1    | 0.127  | 9  | 3  | [10,127] |
| chr11:118420299 | HYOU1   | UTR3        |                                                                                     | - | CtoT | 0.1304 | 0.2143 | 7  | 4  | [14,26]  |
| chr11:118420967 | HYOU1   | UTR3        |                                                                                     | - | AtoT | 0.1667 | 0.4    | 2  | 2  | [12,15]  |
| chr15:41880103  | HYPK    | coding_exon |                                                                                     | + | TtoG | 0.125  | 0.1818 | 6  | 2  | [11,24]  |
| chr15:41881326  | HYPK    | UTR3        |                                                                                     | + | TtoA | 0.1    | 0.1429 | 10 | 6  | [10,32]  |
| chr2:9546585    | IAH1    | mixed       |                                                                                     | + | GtoC | 0.1    | 0.1    | 2  | 2  | [10,10]  |
| chr9:94043005   | IARS    | coding_exon |                                                                                     | - | TtoA | 0.1034 | 0.119  | 9  | 3  | [18,42]  |
| chr9:94095576   | IARS    | UTR5        |                                                                                     | - | CtoA | 0.1    | 0.1429 | 2  | 2  | [10,14]  |
| chr19:10257447  | ICAM1   | UTR3        |                                                                                     | + | AtoG | 0.1034 | 0.1053 | 4  | 2  | [19,29]  |
| chr17:59434871  | ICAM2   | coding_exon | ENST00000225760:TtoP;ENST00000412356:TtoP;ENST00000418105:TtoP;ENST00000418106:TtoP | - | AtoC | 0.1034 | 0.1364 | 7  | 2  | [22,29]  |
| chr19:10305699  | ICAM3   | coding_exon | ENST00000160262:VtoG;                                                               | - | TtoG | 0.1121 | 0.1446 | 5  | 3  | [79,166] |
| chr1:6205174    | ICMT    | UTR3        |                                                                                     | - | AtoG | 0.1176 | 0.3636 | 6  | 4  | [10,17]  |
| chr1:6205700    | ICMT    | UTR3        |                                                                                     | - | AtoG | 0.1    | 0.1111 | 3  | 2  | [10,10]  |
| chr21:44471760  | ICOSLG  | mixed       |                                                                                     | - | CtoT | 0.1    | 0.1667 | 5  | 2  | [18,40]  |
| chr21:44471761  | ICOSLG  | mixed       |                                                                                     | - | AtoC | 0.1111 | 0.1429 | 10 | 3  | [14,36]  |
| chr10:94284490  | IDE     | coding_exon | ENST00000265986:LtoV;                                                               | - | TtoG | 0.1    | 0.1053 | 2  | 2  | [11,19]  |
| chr10:94215450  | IDE     | coding_exon |                                                                                     | - | AtoG | 0.1    | 0.1    | 2  | 2  | [10,10]  |
| chr10:94202042  | IDE     | UTR3        |                                                                                     | - | AtoC | 0.1    | 0.1667 | 2  | 2  | [12,20]  |
| chr15:76248632  | IDH3A   | UTR3        |                                                                                     | + | TtoC | 0.1176 | 0.2    | 3  | 3  | [10,17]  |
| chr20:2587057   | IDH3B   | UTR3        |                                                                                     | - | TtoG | 0.1    | 0.1818 | 2  | 2  | [11,12]  |
| chr6:30818958   | IER3    | UTR3        |                                                                                     | - | TtoA | 0.1667 | 0.4    | 2  | 2  | [11,13]  |
| chr6:30819436   | IER3    | UTR3        |                                                                                     | - | TtoC | 0.1    | 0.1538 | 3  | 3  | [10,36]  |
| chr6:30819455   | IER3    | UTR3        |                                                                                     | - | TtoA | 0.1111 | 0.1429 | 3  | 2  | [18,21]  |
| chr12:6519126   | IFFO1   | UTR3        |                                                                                     | - | TtoC | 0.1176 | 0.125  | 3  | 2  | [16,17]  |
| chr17:38412334  | IFI35   | UTR5        |                                                                                     | + | CtoT | 0.125  | 0.1818 | 2  | 2  | [11,16]  |
| chr1:78888796   | IFI44   | coding_exon | ENST00000370747:StoP;                                                               | + | TtoC | 0.1333 | 0.1765 | 4  | 2  | [15,17]  |
| chr1:27865167   | IFI6    | UTR3        |                                                                                     | - | AtoG | 0.1296 | 0.3091 | 12 | 12 | [13,58]  |
| chr1:27865412   | IFI6    | UTR3        |                                                                                     | - | CtoT | 0.1    | 0.1818 | 7  | 5  | [11,33]  |
| chr2:162852969  | IFIH1   | coding_exon |                                                                                     | - | TtoG | 0.1    | 0.1111 | 4  | 2  | [10,38]  |
| chr10:91168375  | IFIT5   | coding_exon | ENST00000371795:LtoH;ENST00000416601:LtoH;                                          | + | TtoA | 0.1    | 0.1    | 2  | 2  | [10,10]  |
| chr10:91168107  | IFIT5   | coding_exon | ENST00000371795:KtoE;ENST00000416601:KtoE;                                          | + | AtoG | 0.1    | 0.2    | 2  | 2  | [10,10]  |
| chr10:91168089  | IFIT5   | coding_exon | ENST00000371795:FtoV;ENST00000416601:FtoV;                                          | + | TtoG | 0.1    | 0.1    | 4  | 3  | [10,10]  |
| chr11:305264    | IFITM1  | UTR3        |                                                                                     | + | TtoC | 0.1014 | 0.15   | 12 | 4  | [16,70]  |
| chr11:305266    | IFITM1  | UTR3        |                                                                                     | + | CtoA | 0.1    | 0.1333 | 7  | 3  | [10,46]  |
| chr11:305267    | IFITM1  | UTR3        |                                                                                     | + | TtoG | 0.1    | 0.2308 | 3  | 3  | [13,32]  |
| chr6:137560659  | IFNGR1  | UTR3        |                                                                                     | - | AtoT | 0.1875 | 0.2143 | 3  | 2  | [14,16]  |
| chr7:111902733  | IFRD1   | coding_exon | ENST0000005558:StoP;ENST00000403825:StoP;                                           | + | TtoC | 0.1    | 0.125  | 3  | 2  | [10,16]  |
| chr3:50300491   | IFRD2   | UTR3        |                                                                                     | - | TtoC | 0.1    | 0.1    | 3  | 2  | [10,10]  |
| chr16:1579753   | IFT140  | mixed       |                                                                                     | - | AtoG | 0.1111 | 0.2    | 2  | 2  | [10,10]  |
| chr2:27526451   | IFT172  | coding_exon | ENST00000260570:IttoN;ENST00000425023:IttoN;                                        | - | TtoA | 0.1    | 0.1429 | 2  | 2  | [10,14]  |
| chr20:41704641  | IFTS2   | mixed       |                                                                                     | + | TtoC | 0.125  | 0.2    | 6  | 2  | [10,16]  |
| chr3:109365244  | IFTS7   | coding_exon | ENST00000264538:VtoA;ENST00000457963:VtoA;                                          | - | TtoC | 0.1    | 0.1176 | 3  | 2  | [10,17]  |
| chr3:109421082  | IFTS7   | coding_exon |                                                                                     | - | TtoC | 0.1    | 0.1111 | 3  | 2  | [10,18]  |
| chr3:161619840  | IFT80   | coding_exon |                                                                                     | - | TtoC | 0.1    | 0.1    | 3  | 2  | [10,30]  |
| chr3:161629334  | IFT80   | coding_exon |                                                                                     | - | TtoC | 0.1    | 0.2222 | 4  | 2  | [19,30]  |
| chr3:161629335  | IFT80   | coding_exon |                                                                                     | - | TtoC | 0.1    | 0.1429 | 2  | 2  | [10,14]  |
| chr3:161632881  | IFT80   | coding_exon |                                                                                     | - | AtoT | 0.1111 | 0.1111 | 2  | 2  | [10,20]  |
| chr3:161636829  | IFT80   | coding_exon |                                                                                     | - | TtoG | 0.1    | 0.1    | 4  | 2  | [10,22]  |
| chr12:101320378 | IGF1    | UTR3        |                                                                                     | - | CtoT | 0.1818 | 0.1818 | 3  | 2  | [11,11]  |
| chr6:160446441  | IGF2R   | UTR3        |                                                                                     | + | TtoA | 0.1    | 0.1111 | 7  | 2  | [11,19]  |
| chr6:160446528  | IGF2R   | UTR3        |                                                                                     | + | GtoA | 0.1    | 0.1333 | 4  | 3  | [10,15]  |
| chr6:160446889  | IGF2R   | UTR3        |                                                                                     | + | TtoG | 0.1053 | 0.1538 | 4  | 2  | [13,19]  |
| chr6:160447456  | IGF2R   | UTR3        |                                                                                     | + | TtoA | 0.1154 | 0.1429 | 6  | 3  | [21,27]  |
| chr17:35866569  | IGFBP4  | UTR3        |                                                                                     | + | TtoC | 0.1    | 0.1538 | 4  | 3  | [10,17]  |
| chr14:105796436 | IGHV3-6 | coding_exon | ENST00000422244:StoN;                                                               | - | GtoA | 0.9091 | 1      | 3  | 3  | [59,95]  |
| chr14:105401104 | IGHV3-6 | coding_exon | ENST00000422244:PtoH;ENST00000425681:PtoH;                                          | - | CtoA | 0.9286 | 0.963  | 2  | 2  | [14,27]  |
| chr14:105796443 | IGHV3-6 | coding_exon | ENST00000422244:AtoT;                                                               | - | GtoA | 0.9891 | 1      | 2  | 2  | [17,185] |
| chr14:105389086 | IGHV3-6 | coding_exon |                                                                                     | - | TtoC | 0.1    | 0.125  | 2  | 2  | [10,17]  |
| chr14:105901064 | IGHV3-6 | coding_exon |                                                                                     | - | AtoG | 0.3721 | 0.8667 | 2  | 2  | [30,44]  |
| chr1:158331441  | IGSF8   | coding_exon | ENST00000314485:VtoE;ENST00000358475:VtoE;ENST00000368086:VtoE;                     | - | TtoA | 0.1    | 0.1    | 2  | 2  | [10,10]  |
| chr9:110681591  | IKBKAP  | coding_exon | ENST00000374647:StoR;                                                               | - | TtoG | 0.1    | 0.125  | 5  | 2  | [16,21]  |
| chr9:110698708  | IKBKAP  | coding_exon |                                                                                     | - | AtoG | 0.1    | 0.1    | 2  | 2  | [10,10]  |
| chr7:50439158   | IKZF1   | UTR3        |                                                                                     | + | AtoG | 0.1818 | 0.1818 | 6  | 2  | [11,12]  |
| chr2:21357325   | IKZF2   | UTR3        |                                                                                     | - | GtoA | 0.1    | 0.1053 | 2  | 2  | [10,19]  |
| chr2:213575442  | IKZF2   | UTR3        |                                                                                     | - | AtoG | 0.1    | 0.129  | 4  | 2  | [10,31]  |
| chr2:213577670  | IKZF2   | UTR3        |                                                                                     | - | GtoA | 0.1    | 0.1333 | 2  | 2  | [10,15]  |
| chr2:213578625  | IKZF2   | UTR3        |                                                                                     | - | AtoG | 0.1    | 0.1111 | 4  | 2  | [10,27]  |
| chr2:213579251  | IKZF2   | UTR3        |                                                                                     | - | TtoC | 0.125  | 0.1304 | 4  | 2  | [16,23]  |
| chr17:35169924  | IKZF3   | UTR3        |                                                                                     | - | GtoA | 0.1429 | 0.2727 | 9  | 5  | [11,19]  |
| chr17:35171400  | IKZF3   | UTR3        |                                                                                     | - | TtoC | 0.1364 | 0.1818 | 6  | 3  | [11,22]  |
| chr17:35173274  | IKZF3   | UTR3        |                                                                                     | - | AtoT | 0.1    | 0.1    | 4  | 2  | [10,10]  |
| chr17:35175066  | IKZF3   | UTR3        |                                                                                     | - | AtoC | 0.1667 | 0.3333 | 11 | 4  | [10,13]  |
| chr11:117375532 | IL10RA  | coding_exon | ENST00000227752:LtoP;                                                               | + | TtoC | 0.1    | 0.1667 | 3  | 2  | [10,12]  |
| chr21:33574082  | IL10RB  | coding_exon | ENST00000290200:TtoA;ENST00000433395:TtoA;                                          | + | AtoG | 0.1    | 0.1    | 3  | 2  | [10,20]  |
| chr4:142859969  | IL15    | UTR5        |                                                                                     | + | AtoT | 0.1    | 0.1818 | 6  | 4  | [10,14]  |
| chr10:6034792   | IL15RA  | UTR3        |                                                                                     | - | AtoG | 0.1    | 0.1    | 2  | 2  | [10,10]  |
| chr15:79379715  | IL16    | coding_exon | ENST00000302987:VtoG;ENST00000329842:VtoG;ENST00000355368:VtoG;ENST00000355369:VtoG | + | TtoG | 0.1013 | 0.1389 | 9  | 3  | [37,79]  |
| chr15:79392810  | IL16    | UTR3        |                                                                                     | + | AtoG | 0.1    | 0.1    | 2  | 2  | [10,10]  |
| chr3:53874479   | IL17RB  | UTR3        |                                                                                     | + | CtoA | 0.1333 | 0.1429 | 2  | 2  | [14,16]  |
| chr11:71391065  | IL18BP  | UTR3        |                                                                                     | + | AtoC | 0.1    | 0.1111 | 4  | 2  | [10,10]  |
| chr2:102372948  | IL18R1  | coding_exon | ENST00000233957:AtoE;ENST00000409599:AtoE;ENST00000410040:AtoE;                     | + | CtoA | 0.1    | 0.12   | 2  | 2  | [10,25]  |
| chr19:14018392  | IL27RA  | coding_exon | ENST00000263379:VtoA;                                                               | + | TtoC | 0.1    | 0.1818 | 3  | 2  | [10,11]  |
| chr16:3055623   | IL32    | UTR5        |                                                                                     | + | CtoG | 0.1333 | 0.1667 | 2  | 2  | [12,15]  |
| chr16:3055625   | IL32    | UTR5        |                                                                                     | + | GtoA | 0.1429 | 0.1538 | 2  | 2  | [13,14]  |
| chr19:55084747  | IL41I   | coding_exon | ENST00000319225:StoP;ENST00000341114:StoP;ENST00000391826:StoP;                     | - | TtoC | 0.1    | 0.16   | 12 | 5  | [25,130] |

|                 |         |             |                                                                                          |   |      |        |        |    |    |            |
|-----------------|---------|-------------|------------------------------------------------------------------------------------------|---|------|--------|--------|----|----|------------|
| chr16:27282602  | IL4R    | coding_exon | ENST00000170630:KtoE;ENST00000395762:KtoE;                                               | + | AtoG | 0.1    | 0.1    | 3  | 2  | [10,10]    |
| chr16:27283351  | IL4R    | UTR3        |                                                                                          | + | TtoC | 0.1    | 0.1333 | 2  | 2  | [10,15]    |
| chr1:152706084  | IL6R    | UTR3        |                                                                                          | + | GtoT | 0.1    | 0.1    | 2  | 2  | [10,10]    |
| chr5:55276217   | IL6ST   | mixed       |                                                                                          | - | GtoA | 0.16   | 0.1875 | 7  | 3  | [16,30]    |
| chr5:55276235   | IL6ST   | mixed       |                                                                                          | - | CtoA | 0.996  | 1      | 12 | 12 | [320,1635] |
| chr5:55276273   | IL6ST   | mixed       |                                                                                          | - | GtoT | 0.15   | 0.2273 | 6  | 4  | [10,42]    |
| chr19:10656777  | ILF3    | mixed       |                                                                                          | + | AtoT | 0.125  | 0.1364 | 2  | 2  | [16,22]    |
| chr19:10661525  | ILF3    | UTR3        |                                                                                          | + | GtoA | 0.1304 | 0.2    | 6  | 3  | [10,27]    |
| chr11:6588660   | ILK     | UTR3        |                                                                                          | + | TtoA | 0.1    | 0.1923 | 3  | 2  | [20,26]    |
| chr2:86239293   | IMMT    | coding_exon |                                                                                          | - | TtoC | 0.102  | 0.1176 | 5  | 2  | [17,49]    |
| chr15:731718490 | IMP3    | mixed       |                                                                                          | - | AtoG | 0.2    | 0.2308 | 2  | 2  | [10,13]    |
| chr15:731718493 | IMP3    | mixed       |                                                                                          | - | TtoC | 0.1538 | 0.1538 | 4  | 2  | [13,13]    |
| chr15:731718507 | IMP3    | mixed       |                                                                                          | - | AtoG | 0.1176 | 0.1333 | 7  | 3  | [16,23]    |
| chr2:130820655  | IMP4    | UTR3        |                                                                                          | + | TtoC | 0.1    | 0.2083 | 4  | 2  | [20,25]    |
| chr3:49036798   | IMPDH2  | UTR3        |                                                                                          | - | TtoC | 0.1    | 0.2692 | 15 | 9  | [15,57]    |
| chr14:104252110 | INF2    | coding_exon | ENST00000252520:LtoP;ENST00000330634:LtoP;ENST00000339008:LtoP;ENST00000339008:LtoP;     | + | TtoC | 0.1364 | 0.1538 | 2  | 2  | [13,23]    |
| chr2:190944079  | INPP1   | coding_exon |                                                                                          | + | TtoG | 0.1    | 0.1    | 3  | 2  | [10,10]    |
| chr2:190944393  | INPP1   | UTR3        |                                                                                          | + | TtoG | 0.1    | 0.1667 | 2  | 2  | [10,12]    |
| chr2:98537341   | INPP4A  | coding_exon | ENST00000074304:NtoT;ENST00000409016:NtoT;ENST00000409540:NtoT;ENST00000409540:NtoT;     | + | AtoC | 0.1    | 0.125  | 3  | 2  | [16,20]    |
| chr2:98526880   | INPP4A  | coding_exon |                                                                                          | + | GtoC | 0.1    | 0.1    | 2  | 2  | [10,10]    |
| chr1:38111237   | INPP5B  | mixed       |                                                                                          | - | CtoA | 0.1    | 0.1    | 2  | 2  | [10,10]    |
| chr1:38099404   | INPP5B  | UTR3        |                                                                                          | - | AtoG | 0.1111 | 0.1304 | 3  | 2  | [23,38]    |
| chr17:1345698   | INPP5K  | UTR3        |                                                                                          | - | TtoA | 0.1    | 0.1    | 2  | 2  | [10,10]    |
| chr11:71627765  | INPPL1  | UTR3        |                                                                                          | + | GtoA | 0.1    | 0.2857 | 6  | 2  | [10,14]    |
| chr2:118583530  | INSIG2  | UTR3        |                                                                                          | + | AtoG | 0.1    | 0.1    | 2  | 2  | [10,10]    |
| chr19:7117337   | INSR    | coding_exon |                                                                                          | - | AtoG | 0.1    | 0.1    | 3  | 2  | [10,10]    |
| chr19:7063717   | INSR    | UTR3        |                                                                                          | - | CtoA | 0.1    | 0.1    | 2  | 2  | [10,10]    |
| chr19:7066491   | INSR    | UTR3        |                                                                                          | - | AtoG | 0.1    | 0.1053 | 2  | 2  | [19,20]    |
| chr19:7067317   | INSR    | UTR3        |                                                                                          | - | TtoG | 0.1875 | 0.2222 | 5  | 2  | [16,18]    |
| chr7:1506135    | INTS1   | mixed       |                                                                                          | - | AtoG | 0.1304 | 0.1538 | 3  | 2  | [13,23]    |
| chr4:106836217  | INTS12  | coding_exon | ENST00000265150:KtoE;ENST00000340139:KtoE;ENST00000394735:KtoE;ENST00000394735:KtoE;     | - | AtoG | 0.125  | 0.2    | 3  | 2  | [10,16]    |
| chr4:106836245  | INTS12  | coding_exon |                                                                                          | - | AtoG | 0.1    | 0.1667 | 2  | 2  | [10,12]    |
| chr4:106823331  | INTS12  | UTR3        |                                                                                          | - | AtoG | 0.1111 | 0.3    | 4  | 3  | [10,18]    |
| chr1:152013072  | INTS3   | UTR3        |                                                                                          | + | AtoG | 0.1    | 0.2727 | 5  | 2  | [10,11]    |
| chr1:210247292  | INTS7   | coding_exon | ENST00000366992:StoP;ENST00000366993:StoP;ENST00000366994:StoP;ENST00000366994:StoP;     | - | TtoC | 0.1    | 0.1429 | 5  | 2  | [10,14]    |
| chr1:210181794  | INTS7   | coding_exon | ENST00000366992:FtoL;ENST00000366993:FtoL;ENST00000366994:FtoL;ENST00000366994:FtoL;     | - | TtoC | 0.1111 | 0.1818 | 4  | 2  | [10,11]    |
| chr8:28760234   | INTS9   | coding_exon | ENST00000416984:EtoD;                                                                    | - | GtoC | 0.1    | 0.1    | 2  | 2  | [10,10]    |
| chr8:28691324   | INTS9   | coding_exon | ENST00000416984:CtoR;                                                                    | - | TtoC | 0.1    | 0.1    | 3  | 2  | [10,10]    |
| chr3:49736992   | IP6K1   | UTR3        |                                                                                          | - | AtoC | 0.1    | 0.1667 | 2  | 2  | [10,12]    |
| chr3:49739476   | IP6K1   | UTR3        |                                                                                          | - | AtoG | 0.1    | 0.1    | 2  | 2  | [10,10]    |
| chr3:48703890   | IP6K2   | coding_exon | ENST00000328631:LtoQ;ENST00000395507:LtoQ;ENST00000395509:LtoQ;                          | - | TtoA | 0.1    | 0.1875 | 9  | 3  | [17,40]    |
| chr5:61960101   | IPO11   | UTR3        |                                                                                          | + | AtoC | 0.1    | 0.1    | 3  | 2  | [10,10]    |
| chr1:44205953   | IPO13   | UTR3        |                                                                                          | + | AtoG | 0.1    | 0.1429 | 3  | 2  | [10,14]    |
| chr1:44206003   | IPO13   | UTR3        |                                                                                          | + | TtoC | 0.1    | 0.1429 | 5  | 2  | [10,14]    |
| chr11:9411918   | IPO7    | coding_exon | ENST00000379719:LtoI;                                                                    | + | CtoA | 0.1111 | 0.1333 | 2  | 2  | [10,15]    |
| chr11:9420282   | IPO7    | coding_exon | ENST00000379719:DtoG;                                                                    | + | AtoG | 0.1    | 0.2222 | 2  | 2  | [10,10]    |
| chr1:200106918  | IPO9    | coding_exon | ENST00000361565:LtoI;                                                                    | + | AtoC | 0.1    | 0.125  | 2  | 2  | [10,16]    |
| chr3:199161471  | IQCG    | UTR5        |                                                                                          | - | GtoA | 0.1364 | 0.2105 | 5  | 3  | [19,30]    |
| chr3:199161472  | IQCG    | UTR5        |                                                                                          | - | TtoG | 0.1034 | 0.2353 | 6  | 4  | [17,30]    |
| chr3:199167115  | IQCG    | UTR5        |                                                                                          | - | AtoT | 0.4211 | 0.7222 | 4  | 4  | [13,23]    |
| chr15:88839018  | IQGAP1  | coding_exon |                                                                                          | + | AtoG | 0.1    | 0.1538 | 6  | 2  | [10,13]    |
| chr15:88845255  | IQGAP1  | UTR3        |                                                                                          | + | TtoC | 0.1    | 0.1667 | 5  | 2  | [18,20]    |
| chr15:88845392  | IQGAP1  | UTR3        |                                                                                          | + | CtoG | 0.3333 | 0.5455 | 3  | 3  | [11,14]    |
| chr5:75984371   | IQGAP2  | coding_exon | ENST00000274364:HtoR;ENST00000396234:HtoR;                                               | + | AtoG | 0.1    | 0.1429 | 2  | 2  | [10,14]    |
| chr5:76005533   | IQGAP2  | coding_exon |                                                                                          | + | TtoA | 0.1    | 0.1    | 2  | 2  | [10,10]    |
| chr3:12917140   | IQSEC1  | mixed       |                                                                                          | - | AtoG | 0.1    | 0.1111 | 5  | 2  | [10,18]    |
| chr3:12913744   | IQSEC1  | UTR3        |                                                                                          | - | AtoG | 0.1538 | 0.1818 | 2  | 2  | [12,13]    |
| chr3:12915364   | IQSEC1  | UTR3        |                                                                                          | - | CtoG | 0.2    | 0.25   | 2  | 2  | [10,12]    |
| chr12:64928237  | IRAK3   | UTR3        |                                                                                          | + | GtoA | 0.1    | 0.1    | 2  | 2  | [10,10]    |
| chr12:42466627  | IRAK4   | coding_exon | ENST00000356669:KtoN;ENST00000431837:KtoN;ENST00000440781:KtoN;ENST00000440781:KtoN;     | + | GtoT | 0.1    | 0.1    | 3  | 2  | [10,10]    |
| chr12:42463779  | IRAK4   | coding_exon |                                                                                          | + | TtoC | 0.1    | 0.1    | 5  | 3  | [10,10]    |
| chr15:76551319  | IREB2   | coding_exon | ENST00000258886:Wto*;                                                                    | + | GtoA | 0.1    | 0.1    | 2  | 2  | [10,10]    |
| chr15:76573375  | IREB2   | coding_exon |                                                                                          | + | TtoA | 0.1    | 0.1818 | 3  | 2  | [10,11]    |
| chr15:76577669  | IREB2   | UTR3        |                                                                                          | + | GtoT | 0.1    | 0.1    | 2  | 2  | [10,10]    |
| chr1:232807016  | IRF2BP2 | UTR3        |                                                                                          | - | TtoG | 0.1    | 0.1    | 4  | 2  | [10,10]    |
| chr1:232807766  | IRF2BP2 | UTR3        |                                                                                          | - | AtoG | 0.1    | 0.1538 | 2  | 2  | [10,13]    |
| chr1:232808840  | IRF2BP2 | UTR3        |                                                                                          | - | TtoG | 0.1    | 0.1071 | 5  | 3  | [10,28]    |
| chr1:232808841  | IRF2BP2 | UTR3        |                                                                                          | - | GtoT | 0.1034 | 0.2727 | 5  | 5  | [11,29]    |
| chr19:54860701  | IRF3    | UTR5        |                                                                                          | - | AtoC | 0.1875 | 0.3    | 4  | 2  | [10,16]    |
| chr7:128376626  | IRF5    | UTR3        |                                                                                          | + | TtoC | 0.1333 | 0.2143 | 10 | 4  | [14,37]    |
| chr11:602563    | IRF7    | UTR3        |                                                                                          | - | TtoC | 0.1333 | 0.1875 | 5  | 3  | [16,45]    |
| chr16:84513117  | IRF8    | UTR3        |                                                                                          | + | TtoA | 0.1111 | 0.1905 | 6  | 3  | [22,36]    |
| chr19:48785220  | IRGQ    | UTR3        |                                                                                          | - | GtoA | 0.1    | 0.1818 | 3  | 2  | [10,11]    |
| chr14:74031709  | ISCA2   | UTR3        |                                                                                          | + | TtoC | 0.1111 | 0.1176 | 6  | 2  | [17,18]    |
| chr14:74031712  | ISCA2   | UTR3        |                                                                                          | + | GtoA | 0.1    | 0.1053 | 3  | 2  | [19,20]    |
| chr12:107482056 | ISCU    | coding_exon | ENST00000338291:TtoI;ENST00000392807:TtoI;                                               | + | CtoT | 0.1    | 0.1333 | 3  | 2  | [10,15]    |
| chr12:107482058 | ISCU    | coding_exon | ENST00000338291:Qto*;ENST00000392807:Qto*;                                               | + | CtoT | 0.1    | 0.1    | 4  | 2  | [10,10]    |
| chr1:154963323  | ISG20L2 | coding_exon | ENST00000313146:QtoR;ENST00000368219:QtoR;                                               | - | AtoG | 0.1    | 0.1    | 2  | 2  | [10,10]    |
| chr1:154958985  | ISG20L2 | UTR3        |                                                                                          | - | TtoC | 0.1    | 0.1    | 2  | 2  | [10,10]    |
| chr5:128470628  | ISOC1   | coding_exon | ENST00000173527:MtoV;                                                                    | + | AtoG | 0.1    | 0.2    | 3  | 2  | [10,10]    |
| chr5:128477140  | ISOC1   | UTR3        |                                                                                          | + | AtoG | 0.1    | 0.1667 | 2  | 2  | [10,12]    |
| chr20:32560731  | ITCH    | UTR3        |                                                                                          | + | TtoG | 0.1    | 0.1429 | 2  | 2  | [10,14]    |
| chr20:32560874  | ITCH    | UTR3        |                                                                                          | + | TtoC | 0.1    | 0.1    | 2  | 2  | [10,10]    |
| chr16:250154    | ITFG3   | coding_exon | ENST00000301678:FtoL;ENST00000301679:FtoL;ENST00000399932:FtoL;ENST00000399932:FtoL;     | + | TtoC | 0.1    | 0.1818 | 3  | 2  | [10,11]    |
| chr2:182104651  | ITGA4   | coding_exon | ENST00000397033:HtoR;                                                                    | + | AtoG | 0.1    | 0.1667 | 8  | 3  | [10,12]    |
| chr17:3576065   | ITGAE   | coding_exon |                                                                                          | - | TtoC | 0.1    | 0.1    | 2  | 2  | [10,10]    |
| chr10:33252584  | ITGB1   | coding_exon | ENST00000302252:IttoV;ENST00000302278:IttoV;ENST00000359614:IttoV;ENST00000359614:IttoV; | - | AtoG | 0.1    | 0.1    | 6  | 2  | [10,20]    |
| chr21:45130366  | ITGB2   | UTR3        |                                                                                          | - | AtoG | 0.1053 | 0.1154 | 8  | 2  | [19,26]    |
| chr13:47733318  | ITM2B   | coding_exon | ENST00000378549:HtoR;ENST00000378565:HtoR;                                               | + | AtoG | 0.1    | 0.1176 | 3  | 2  | [10,17]    |
| chr14:92475959  | ITPK1   | mixed       |                                                                                          | - | TtoA | 0.1053 | 0.2    | 8  | 4  | [15,25]    |
| chr14:92475960  | ITPK1   | mixed       |                                                                                          | - | AtoG | 0.1    | 0.2222 | 6  | 5  | [10,22]    |
| chr1:224991037  | ITPK8   | coding_exon | ENST00000272117:QtoR;ENST00000429204:QtoR;                                               | - | AtoG | 0.1    | 0.1538 | 3  | 2  | [10,13]    |
| chr1:224886156  | ITPK8   | UTR3        |                                                                                          | - | AtoG | 0.125  | 0.1667 | 3  | 2  | [12,17]    |
| chr3:4804754    | ITPR1   | coding_exon | ENST00000302640:KtoE;ENST00000354582:KtoE;ENST00000356617:KtoE;ENST00000356617:KtoE;     | + | AtoG | 0.1    | 0.125  | 2  | 2  | [10,16]    |
| chr12:26538403  | ITPR2   | coding_exon | ENST00000381340:GtoS;ENST00000451599:GtoS;                                               | - | GtoA | 0.1    | 0.1    | 2  | 2  | [10,10]    |
| chr12:26666602  | ITPR2   | coding_exon |                                                                                          | - | AtoG | 0.1    | 0.2    | 2  | 2  | [10,10]    |

|                 |          |             |                                                                                      |   |      |        |        |    |   |          |
|-----------------|----------|-------------|--------------------------------------------------------------------------------------|---|------|--------|--------|----|---|----------|
| chr12:26726148  | ITPR2    | coding_exon |                                                                                      | - | CtoA | 0.1    | 0.1333 | 3  | 2 | [10,15]  |
| chr12:26380105  | ITPR2    | UTR3        |                                                                                      | - | AtoG | 0.1    | 0.2308 | 3  | 3 | [10,13]  |
| chr12:26381097  | ITPR2    | UTR3        |                                                                                      | - | AtoC | 0.1    | 0.1176 | 2  | 2 | [10,17]  |
| chr12:26381107  | ITPR2    | UTR3        |                                                                                      | - | GtoA | 0.1    | 0.2    | 3  | 2 | [10,10]  |
| chr12:26381108  | ITPR2    | UTR3        |                                                                                      | - | AtoG | 0.1    | 0.1667 | 3  | 2 | [10,12]  |
| chr12:26381369  | ITPR2    | UTR3        |                                                                                      | - | TtoC | 0.1    | 0.125  | 3  | 2 | [10,16]  |
| chr12:26383149  | ITPR2    | UTR3        |                                                                                      | - | TtoA | 0.1333 | 0.1818 | 4  | 2 | [11,16]  |
| chr6:33731553   | ITPR3    | coding_exon | ENST00000374316:YtoN;                                                                | + | TtoA | 0.1    | 0.1    | 3  | 2 | [10,10]  |
| chr6:33760155   | ITPR3    | coding_exon | ENST00000374316:LtoM;                                                                | + | CtoA | 0.1    | 0.1429 | 2  | 2 | [10,14]  |
| chr6:33755773   | ITPR3    | coding_exon | ENST00000374316:DtoA;                                                                | + | AtoC | 0.1    | 0.1    | 2  | 2 | [10,10]  |
| chr10:106062970 | ITPRIP   | mixed       |                                                                                      | - | AtoG | 0.1    | 0.1    | 2  | 2 | [10,10]  |
| chr2:24334466   | ITSN2    | coding_exon | ENST00000355123:GtoR;ENST00000361999:GtoR;ENST00000380868:GtoR;ENST00000380868:GtoR; | - | GtoA | 0.1    | 0.1304 | 2  | 2 | [10,23]  |
| chr2:24325232   | ITSN2    | coding_exon |                                                                                      | - | TtoC | 0.1    | 0.1818 | 4  | 2 | [10,11]  |
| chr2:24388712   | ITSN2    | coding_exon |                                                                                      | - | TtoC | 0.1    | 0.1    | 5  | 2 | [10,30]  |
| chr15:38497848  | IVD      | UTR3        |                                                                                      | + | TtoG | 0.1    | 0.1    | 2  | 2 | [10,10]  |
| chr15:38498319  | IVD      | UTR3        |                                                                                      | + | GtoA | 0.1111 | 0.1818 | 5  | 2 | [11,18]  |
| chr15:38500366  | IVD      | UTR3        |                                                                                      | + | TtoA | 0.1    | 0.1    | 4  | 2 | [10,10]  |
| chr1:183533525  | IVNS1ABP | UTR3        |                                                                                      | - | AtoG | 0.1    | 0.1176 | 5  | 2 | [17,20]  |
| chr1:183533595  | IVNS1ABP | UTR3        |                                                                                      | - | TtoG | 0.1    | 0.1    | 7  | 2 | [10,11]  |
| chr1:183533728  | IVNS1ABP | UTR3        |                                                                                      | - | AtoG | 0.1    | 0.1053 | 2  | 2 | [10,19]  |
| chr2:127955046  | IWS1     | UTR3        |                                                                                      | - | AtoG | 0.1154 | 0.1176 | 10 | 2 | [17,26]  |
| chr2:127955047  | IWS1     | UTR3        |                                                                                      | - | CtoA | 0.1    | 0.1111 | 4  | 2 | [10,18]  |
| chr3:9910528    | JAGN1    | UTR3        |                                                                                      | + | TtoC | 0.1    | 0.1    | 5  | 2 | [10,10]  |
| chr1:65098412   | JAK1     | coding_exon | ENST00000342505:VtoA;                                                                | + | TtoC | 0.1    | 0.125  | 4  | 2 | [10,16]  |
| chr21:25996414  | JAM2     | coding_exon | ENST00000312957:VtoA;ENST00000400532:VtoA;ENST00000400533:VtoA;ENST00000400534:VtoA; | + | TtoC | 0.1    | 0.1    | 2  | 2 | [10,10]  |
| chr6:15621214   | JARID2   | coding_exon |                                                                                      | + | TtoC | 0.1    | 0.2    | 4  | 3 | [10,16]  |
| chr4:75006550   | JDP2     | UTR3        |                                                                                      | + | CtoA | 0.1    | 0.1    | 2  | 2 | [10,10]  |
| chr7:72226173   | JMJD6    | mixed       |                                                                                      | - | AtoG | 0.1111 | 0.2941 | 6  | 2 | [17,20]  |
| chr16:673532    | JMJD8    | coding_exon | ENST00000293882:NtoK;ENST00000412368:NtoK;ENST00000454700:NtoK;                      | - | TtoA | 0.1176 | 0.1765 | 5  | 2 | [17,17]  |
| chr16:671680    | JMJD8    | UTR3        |                                                                                      | - | TtoA | 0.1    | 0.1818 | 2  | 2 | [10,11]  |
| chr16:672748    | JMJD8    | UTR3        |                                                                                      | - | CtoT | 0.1026 | 0.1111 | 5  | 2 | [27,39]  |
| chr22:37411681  | JOSD1    | UTR3        |                                                                                      | - | TtoC | 0.1176 | 0.2    | 6  | 4 | [10,17]  |
| chr22:37412780  | JOSD1    | UTR3        |                                                                                      | - | AtoG | 0.1111 | 0.1111 | 5  | 2 | [18,18]  |
| chr4:23108229   | JPH4     | UTR3        |                                                                                      | - | TtoC | 0.1364 | 0.1579 | 7  | 3 | [19,36]  |
| chr19:12765027  | JUNB     | coding_exon | ENST00000302754:HtoR;                                                                | + | AtoG | 0.1    | 0.1538 | 10 | 4 | [13,44]  |
| chr16:74233110  | KARS     | coding_exon |                                                                                      | - | AtoG | 0.2373 | 0.4015 | 2  | 2 | [59,137] |
| chr16:74219162  | KARS     | UTR3        |                                                                                      | - | AtoG | 0.1042 | 0.1379 | 12 | 4 | [19,49]  |
| chr17:37524728  | KAT2A    | coding_exon |                                                                                      | - | CtoT | 0.1    | 0.1    | 6  | 2 | [10,10]  |
| chr6:150001321  | KATNA1   | coding_exon | ENST00000335643:LtoP;ENST00000335647:LtoP;ENST00000367411:LtoP;                      | - | TtoC | 0.1    | 0.1    | 3  | 2 | [10,10]  |
| chr11:47550697  | KBTD4    | UTR3        |                                                                                      | - | AtoG | 0.1176 | 0.2    | 8  | 3 | [10,17]  |
| chr2:85108563   | KCMF1    | coding_exon |                                                                                      | + | TtoC | 0.1071 | 0.1429 | 7  | 3 | [21,30]  |
| chr1:6083285    | KCNAB2   | UTR3        |                                                                                      | + | GtoC | 0.24   | 0.4884 | 4  | 4 | [24,43]  |
| chr1:6083286    | KCNAB2   | UTR3        |                                                                                      | + | AtoG | 0.2353 | 0.3333 | 4  | 4 | [17,34]  |
| chr1:6083669    | KCNAB2   | UTR3        |                                                                                      | + | TtoC | 0.1    | 0.2    | 4  | 2 | [15,20]  |
| chr1:6083821    | KCNAB2   | UTR3        |                                                                                      | + | AtoG | 0.125  | 0.1667 | 7  | 2 | [16,42]  |
| chr17:59020652  | KCNH6    | UTR3        |                                                                                      | + | TtoC | 0.122  | 0.1304 | 2  | 2 | [23,42]  |
| chr17:59022438  | KCNH6    | UTR3        |                                                                                      | + | AtoG | 0.1    | 0.1818 | 8  | 3 | [10,16]  |
| chr17:59116671  | KCNH6    | UTR3        |                                                                                      | + | GtoC | 0.1667 | 0.2    | 5  | 3 | [10,18]  |
| chr17:59116672  | KCNH6    | UTR3        |                                                                                      | + | TtoC | 0.1    | 0.1875 | 4  | 2 | [10,17]  |
| chr12:108382824 | KCTD10   | coding_exon |                                                                                      | - | AtoG | 0.1    | 0.1    | 3  | 2 | [10,20]  |
| chr12:108371300 | KCTD10   | UTR3        |                                                                                      | - | TtoC | 0.1    | 0.1    | 2  | 2 | [10,10]  |
| chr12:108371343 | KCTD10   | UTR3        |                                                                                      | - | AtoG | 0.125  | 0.1667 | 4  | 2 | [12,16]  |
| chr17:70572323  | KCTD2    | UTR3        |                                                                                      | + | TtoC | 0.1    | 0.1    | 3  | 2 | [10,10]  |
| chr6:36565445   | KCTD20   | UTR3        |                                                                                      | + | AtoG | 0.1    | 0.3333 | 9  | 6 | [10,20]  |
| chr11:107849343 | KDELC2   | UTR3        |                                                                                      | - | TtoC | 0.1    | 0.1    | 2  | 2 | [10,10]  |
| chr19:53584669  | KDELR1   | coding_exon | ENST00000330720:TtoP;                                                                | - | AtoC | 0.1148 | 0.2353 | 4  | 2 | [17,61]  |
| chr7:6469045    | KDELR2   | UTR3        |                                                                                      | - | AtoT | 0.1    | 0.1081 | 4  | 2 | [20,37]  |
| chr11:23281443  | KDM1     | coding_exon |                                                                                      | + | AtoC | 0.1111 | 0.1667 | 13 | 5 | [19,36]  |
| chr11:66739928  | KDM2A    | coding_exon | ENST00000401583:CtoG;                                                                | + | TtoG | 0.1    | 0.2    | 2  | 2 | [10,10]  |
| chr11:66780005  | KDM2A    | UTR3        |                                                                                      | + | TtoC | 0.1    | 0.1176 | 2  | 2 | [10,17]  |
| chr11:66780378  | KDM2A    | UTR3        |                                                                                      | + | GtoA | 0.1    | 0.1538 | 2  | 2 | [10,13]  |
| chr11:66780411  | KDM2A    | UTR3        |                                                                                      | + | AtoG | 0.1    | 0.125  | 2  | 2 | [10,16]  |
| chr12:120471165 | KDM2B    | coding_exon | ENST00000261824:KtoR;ENST00000377069:KtoR;ENST00000377071:KtoR;ENST00000377072:KtoR; | - | AtoG | 0.1667 | 0.6    | 6  | 6 | [10,14]  |
| chr12:120351711 | KDM2B    | UTR3        |                                                                                      | - | AtoG | 0.1    | 0.1765 | 7  | 2 | [10,17]  |
| chr5:137755483  | KDM3B    | coding_exon | ENST00000314358:GtoR;ENST00000394866:GtoR;                                           | + | GtoA | 0.1    | 0.1    | 3  | 2 | [10,10]  |
| chr5:137799418  | KDM3B    | UTR3        |                                                                                      | + | TtoC | 0.1    | 0.1176 | 5  | 2 | [10,17]  |
| chr5:137800310  | KDM3B    | UTR3        |                                                                                      | + | AtoG | 0.1    | 0.1667 | 4  | 2 | [12,20]  |
| chr5:137800469  | KDM3B    | UTR3        |                                                                                      | + | TtoG | 0.1    | 0.2    | 2  | 2 | [10,10]  |
| chr19:5061795   | KDM4B    | coding_exon | ENST00000159111:StoP;ENST00000381759:StoP;                                           | + | TtoC | 0.1    | 0.1    | 2  | 2 | [10,20]  |
| chr19:5082097   | KDM4B    | coding_exon | ENST00000159111:RtoS;                                                                | + | GtoC | 0.1    | 0.125  | 3  | 2 | [10,17]  |
| chr19:5103120   | KDM4B    | UTR3        |                                                                                      | + | CtoG | 0.1429 | 0.1538 | 4  | 2 | [21,26]  |
| chr19:5103126   | KDM4B    | UTR3        |                                                                                      | + | GtoA | 0.1071 | 0.1538 | 2  | 2 | [13,28]  |
| chr19:5104603   | KDM4B    | UTR3        |                                                                                      | + | TtoC | 0.1333 | 0.2    | 5  | 3 | [10,15]  |
| chr12:292607    | KDM5A    | coding_exon | ENST00000382815:VtoA;ENST00000399787:VtoA;ENST00000399788:VtoA;                      | - | TtoC | 0.1    | 0.1429 | 4  | 2 | [14,20]  |
| chr12:312997    | KDM5A    | coding_exon | ENST00000382815:EtoK;ENST00000399787:EtoK;ENST00000399788:EtoK;                      | - | GtoA | 0.1    | 0.2    | 3  | 3 | [10,10]  |
| chr12:275043    | KDM5A    | coding_exon | ENST00000382815:AtoV;ENST00000399787:AtoV;ENST00000399788:AtoV;                      | - | CtoT | 0.1    | 0.125  | 2  | 2 | [10,16]  |
| chr12:265030    | KDM5A    | mixed       |                                                                                      | - | TtoA | 0.125  | 0.1429 | 7  | 2 | [17,21]  |
| chr12:264669    | KDM5A    | UTR3        |                                                                                      | - | AtoC | 0.1667 | 0.2632 | 6  | 4 | [13,19]  |
| chr17:7690999   | KDM6B    | coding_exon | ENST00000254846:StoR;ENST00000448097:StoR;                                           | + | TtoG | 0.1    | 0.1    | 2  | 2 | [10,10]  |
| chr17:7697093   | KDM6B    | coding_exon | ENST00000254846:LtoR;ENST00000448097:LtoR;                                           | + | TtoG | 0.1    | 0.1    | 2  | 2 | [10,10]  |
| chr17:7690265   | KDM6B    | coding_exon |                                                                                      | + | AtoG | 0.1    | 0.1    | 2  | 2 | [10,10]  |
| chr17:7698028   | KDM6B    | UTR3        |                                                                                      | + | AtoC | 0.1    | 0.1111 | 2  | 2 | [10,10]  |
| chr17:7698171   | KDM6B    | UTR3        |                                                                                      | + | AtoC | 0.1    | 0.125  | 3  | 3 | [10,16]  |
| chr18:59153497  | KDSR     | coding_exon |                                                                                      | - | AtoG | 0.1    | 0.1818 | 2  | 2 | [10,11]  |
| chr19:6366156   | KHSRP    | coding_exon | ENST00000398148:QtoP;                                                                | - | AtoC | 0.1    | 0.2083 | 5  | 4 | [25,41]  |
| chr19:6364536   | KHSRP    | mixed       |                                                                                      | - | TtoC | 0.1071 | 0.1235 | 4  | 3 | [28,81]  |
| chr19:6364740   | KHSRP    | mixed       |                                                                                      | - | AtoC | 0.1042 | 0.1471 | 4  | 4 | [29,96]  |
| chr1:173393706  | KIAA0040 | mixed       |                                                                                      | - | TtoC | 0.1    | 0.1    | 3  | 2 | [10,10]  |
| chr1:173394013  | KIAA0040 | mixed       |                                                                                      | - | AtoC | 0.1    | 0.25   | 5  | 4 | [10,15]  |
| chr1:19418760   | KIAA0090 | coding_exon | ENST00000375199:YtoH;ENST00000375208:YtoH;ENST00000477853:YtoH;                      | - | TtoC | 0.1154 | 0.2    | 5  | 2 | [10,26]  |
| chr1:19432111   | KIAA0090 | coding_exon | ENST00000375184:RtoQ;ENST00000375199:RtoQ;ENST00000375208:RtoQ;ENST00000375209:RtoQ; | - | GtoA | 0.1    | 0.125  | 2  | 2 | [10,16]  |
| chr1:19432207   | KIAA0090 | coding_exon | ENST00000375184:LtoP;ENST00000375199:LtoP;ENST00000375208:LtoP;ENST00000375209:LtoP; | - | TtoC | 0.1    | 0.1111 | 5  | 2 | [10,18]  |
| chr15:62445235  | KIAA0101 | UTR3        |                                                                                      | - | AtoG | 0.1053 | 0.1176 | 3  | 2 | [17,19]  |
| chr15:62445239  | KIAA0101 | UTR3        |                                                                                      | - | TtoC | 0.1    | 0.1176 | 7  | 3 | [11,27]  |
| chr5:141298499  | KIAA0141 | coding_exon |                                                                                      | + | TtoG | 0.1    | 0.1    | 4  | 2 | [10,20]  |
| chr16:70514018  | KIAA0174 | coding_exon |                                                                                      | + | CtoA | 0.1351 | 0.2115 | 4  | 2 | [37,52]  |

|                 |           |             |                                                                                      |   |      |        |        |   |   |         |
|-----------------|-----------|-------------|--------------------------------------------------------------------------------------|---|------|--------|--------|---|---|---------|
| chr16:70514772  | KIAA0174  | coding_exon |                                                                                      | + | AtoG | 0.1176 | 0.125  | 4 | 2 | [16,17] |
| chr16:84245995  | KIAA0182  | mixed       |                                                                                      | + | CtoA | 0.1    | 0.1    | 2 | 2 | [10,10] |
| chr16:84266124  | KIAA0182  | UTR3        |                                                                                      | + | AtoG | 0.1    | 0.1    | 2 | 2 | [10,10] |
| chr16:84266408  | KIAA0182  | UTR3        |                                                                                      | + | TtoG | 0.1429 | 0.1429 | 2 | 2 | [14,14] |
| chr16:84266986  | KIAA0182  | UTR3        |                                                                                      | + | AtoG | 0.1    | 0.1    | 2 | 2 | [10,10] |
| chr16:84267149  | KIAA0182  | UTR3        |                                                                                      | + | TtoC | 0.1    | 0.1    | 4 | 2 | [10,10] |
| chr17:70999575  | KIAA0195  | coding_exon | ENST00000314256:KtoR;ENST00000375248:KtoR;                                           | + | AtoG | 0.1    | 0.2143 | 3 | 2 | [10,14] |
| chr17:70999576  | KIAA0195  | coding_exon | ENST00000314256:KtoN;ENST00000375248:KtoN;                                           | + | GtoC | 0.1364 | 0.2353 | 4 | 2 | [17,22] |
| chr17:71001451  | KIAA0195  | coding_exon | ENST00000314256:CtoR;ENST00000375248:CtoR;                                           | + | TtoC | 0.1053 | 0.1053 | 4 | 2 | [19,19] |
| chr17:71007022  | KIAA0195  | UTR3        |                                                                                      | + | TtoG | 0.1333 | 0.1818 | 2 | 2 | [11,15] |
| chr8:126154622  | KIAA0196  | coding_exon | ENST00000318410:CtoR;                                                                | - | TtoC | 0.1    | 0.1111 | 3 | 2 | [10,18] |
| chr3:198905643  | KIAA0226  | coding_exon | ENST00000273582:StoG;ENST00000296343:StoG;ENST00000389665:StoG;ENST00000273582:StoA; | - | AtoG | 0.1    | 0.1429 | 5 | 3 | [14,20] |
| chr3:198893832  | KIAA0226  | coding_exon | ENST00000273582:AtoS;ENST00000296343:AtoS;ENST00000389665:AtoS;ENST00000273582:AtoD; | - | GtoT | 0.1667 | 0.2143 | 2 | 2 | [14,18] |
| chr3:198912326  | KIAA0226  | coding_exon |                                                                                      | - | CtoA | 0.1111 | 0.2105 | 3 | 2 | [18,19] |
| chr3:198884763  | KIAA0226  | UTR3        |                                                                                      | - | AtoC | 0.1    | 0.1818 | 2 | 2 | [10,11] |
| chr3:198886234  | KIAA0226  | UTR3        |                                                                                      | - | TtoC | 0.1    | 0.1111 | 4 | 3 | [10,18] |
| chr6:42943706   | KIAA0240  | UTR3        |                                                                                      | + | TtoG | 0.1    | 0.1    | 5 | 2 | [10,10] |
| chr14:69247629  | KIAA0247  | UTR3        |                                                                                      | + | TtoC | 0.1    | 0.1053 | 4 | 2 | [10,19] |
| chr1:35691753   | KIAA0319L | coding_exon |                                                                                      | - | AtoG | 0.1    | 0.1    | 2 | 2 | [10,10] |
| chr9:113176115  | KIAA0368  | mixed       |                                                                                      | - | TtoC | 0.1    | 0.1111 | 2 | 2 | [10,18] |
| chr9:113188552  | KIAA0368  | mixed       |                                                                                      | - | TtoA | 0.1    | 0.2    | 4 | 3 | [10,17] |
| chr9:113214220  | KIAA0368  | mixed       |                                                                                      | - | GtoT | 0.1176 | 0.1429 | 4 | 2 | [14,17] |
| chr9:113214221  | KIAA0368  | mixed       |                                                                                      | - | TtoC | 0.1333 | 0.1429 | 5 | 2 | [14,15] |
| chr9:113164016  | KIAA0368  | UTR3        |                                                                                      | - | TtoC | 0.1429 | 0.1818 | 3 | 2 | [11,14] |
| chr14:34662493  | KIAA0391  | coding_exon |                                                                                      | + | TtoC | 0.1    | 0.1    | 3 | 2 | [10,10] |
| chr20:36074379  | KIAA0406  | coding_exon |                                                                                      | - | CtoA | 0.1    | 0.1    | 4 | 2 | [10,10] |
| chr20:36044891  | KIAA0406  | UTR3        |                                                                                      | - | TtoA | 0.1    | 0.1    | 3 | 2 | [10,10] |
| chr7:4796083    | KIAA0415  | coding_exon | ENST00000348624:HtoR;ENST0000041897:HtoR;ENST00000450194:HtoR;                       | + | AtoG | 0.1    | 0.2727 | 5 | 3 | [10,18] |
| chr7:4796082    | KIAA0415  | coding_exon | ENST00000348624:HtoD;ENST0000041897:HtoD;ENST00000450194:HtoD;                       | + | CtoG | 0.1    | 0.1667 | 5 | 3 | [10,20] |
| chr7:4773595    | KIAA0415  | coding_exon |                                                                                      | + | AtoC | 0.1    | 0.1053 | 2 | 2 | [10,19] |
| chr7:4773552    | KIAA0415  | coding_exon |                                                                                      | + | AtoG | 0.1    | 0.1667 | 4 | 2 | [10,12] |
| chr16:15598187  | KIAA0430  | coding_exon | ENST00000321370:VtoE;ENST00000344181:VtoE;ENST00000396368:VtoE;                      | - | TtoA | 0.1    | 0.1    | 2 | 2 | [10,10] |
| chr16:15595753  | KIAA0430  | UTR3        |                                                                                      | - | GtoA | 0.1379 | 0.1818 | 2 | 2 | [11,29] |
| chr16:15596013  | KIAA0430  | UTR3        |                                                                                      | - | TtoC | 0.1    | 0.1176 | 2 | 2 | [10,18] |
| chr1:46954664   | KIAA0494  | coding_exon | ENST00000371933:LtoH;                                                                | - | TtoA | 0.1    | 0.1333 | 5 | 2 | [10,15] |
| chr1:46927849   | KIAA0494  | coding_exon | ENST00000371933:KtoN;                                                                | - | AtoC | 0.1    | 0.1333 | 2 | 2 | [10,15] |
| chr12:22493082  | KIAA0528  | UTR3        |                                                                                      | - | TtoG | 0.1    | 0.1    | 2 | 2 | [10,10] |
| chr13:41077329  | KIAA0564  | coding_exon | ENST00000251030:LtoP;ENST00000379310:LtoP;                                           | - | TtoC | 0.1667 | 0.1818 | 3 | 2 | [12,22] |
| chr13:41062797  | KIAA0564  | coding_exon |                                                                                      | - | TtoC | 0.1    | 0.1538 | 3 | 2 | [10,13] |
| chr13:41087197  | KIAA0564  | coding_exon |                                                                                      | - | TtoC | 0.1    | 0.1    | 3 | 2 | [10,10] |
| chr14:58035355  | KIAA0586  | coding_exon |                                                                                      | + | AtoG | 0.1    | 0.1818 | 2 | 2 | [10,11] |
| chr11:46652258  | KIAA0652  | UTR3        |                                                                                      | + | AtoG | 0.1    | 0.1111 | 3 | 2 | [10,18] |
| chr11:46652553  | KIAA0652  | UTR3        |                                                                                      | + | TtoC | 0.1379 | 0.2    | 2 | 2 | [10,29] |
| chr11:46596007  | KIAA0652  | UTR5        |                                                                                      | + | AtoG | 0.1    | 0.1    | 2 | 2 | [10,10] |
| chr17:2546766   | KIAA0664  | coding_exon | ENST00000322335:TtoA;ENST00000435359:TtoA;                                           | - | AtoG | 0.1053 | 0.2667 | 5 | 5 | [15,37] |
| chr17:2546579   | KIAA0664  | coding_exon | ENST00000322335:DtoA;ENST00000435359:DtoA;                                           | - | AtoC | 0.1    | 0.1818 | 4 | 3 | [10,25] |
| chr17:2539435   | KIAA0664  | UTR3        |                                                                                      | - | TtoC | 0.125  | 0.1818 | 7 | 2 | [11,16] |
| chr12:53646183  | KIAA0748  | mixed       |                                                                                      | - | AtoG | 0.1    | 0.1333 | 3 | 2 | [10,15] |
| chr12:53647245  | KIAA0748  | mixed       |                                                                                      | - | TtoC | 0.1    | 0.12   | 4 | 2 | [10,25] |
| chr12:53654657  | KIAA0748  | UTR5        |                                                                                      | - | AtoC | 0.1333 | 0.25   | 6 | 2 | [15,16] |
| chr17:6440223   | KIAA0753  | coding_exon | ENST00000361413:MtoL;                                                                | - | GtoA | 0.1    | 0.1    | 2 | 2 | [10,10] |
| chr19:19307995  | KIAA0892  | mixed       |                                                                                      | + | AtoC | 0.1    | 0.1667 | 4 | 2 | [10,12] |
| chr19:19329260  | KIAA0892  | UTR3        |                                                                                      | + | CtoT | 0.3214 | 0.381  | 2 | 2 | [21,28] |
| chr19:19329283  | KIAA0892  | UTR3        |                                                                                      | + | AtoT | 0.1111 | 0.125  | 2 | 2 | [16,27] |
| chr1:154162102  | KIAA0907  | coding_exon | ENST00000368319:CtoG;ENST00000368320:CtoG;ENST00000368321:CtoG;                      | - | TtoG | 0.1    | 0.1    | 2 | 2 | [10,10] |
| chr1:154149729  | KIAA0907  | UTR3        |                                                                                      | - | TtoA | 0.1081 | 0.125  | 4 | 2 | [16,41] |
| chr1:154149733  | KIAA0907  | UTR3        |                                                                                      | - | TtoC | 0.1    | 0.1667 | 5 | 3 | [10,19] |
| chr1:154150201  | KIAA0907  | UTR3        |                                                                                      | - | CtoA | 0.1429 | 0.1818 | 5 | 2 | [11,21] |
| chr10:75227206  | KIAA0913  | coding_exon | ENST00000398706:RtoG;ENST00000412131:RtoG;ENST00000414462:RtoG;ENST00000398706:RtoA; | + | AtoG | 0.1    | 0.1    | 4 | 2 | [10,10] |
| chr10:75218480  | KIAA0913  | coding_exon |                                                                                      | + | AtoG | 0.1    | 0.2727 | 5 | 3 | [10,15] |
| chr4:154744729  | KIAA0922  | coding_exon | ENST00000361316:Itov;ENST00000409663:Itov;ENST00000409959:Itov;ENST00000361316:GtoW; | + | AtoG | 0.1176 | 0.1429 | 2 | 2 | [14,34] |
| chr5:5517758    | KIAA0947  | coding_exon | ENST00000296564:GtoW;                                                                | + | GtoT | 0.1    | 0.1    | 2 | 2 | [10,10] |
| chr18:27673321  | KIAA1012  | coding_exon | ENST00000283351:TtoK;ENST00000451747:TtoK;                                           | - | CtoA | 0.1    | 0.1    | 2 | 2 | [10,10] |
| chr12:104085433 | KIAA1033  | UTR3        |                                                                                      | + | TtoA | 0.1    | 0.1818 | 3 | 2 | [10,11] |
| chr7:141032853  | KIAA1147  | coding_exon | ENST00000297761:StoP;ENST00000482493:StoP;                                           | - | TtoC | 0.1    | 0.125  | 3 | 2 | [10,16] |
| chr7:141003744  | KIAA1147  | UTR3        |                                                                                      | - | TtoC | 0.1    | 0.1667 | 5 | 2 | [12,20] |
| chr7:141004275  | KIAA1147  | UTR3        |                                                                                      | - | AtoG | 0.1    | 0.1111 | 2 | 2 | [18,30] |
| chr7:141005075  | KIAA1147  | UTR3        |                                                                                      | - | GtoA | 0.3939 | 0.5789 | 2 | 2 | [19,33] |
| chr7:141005208  | KIAA1147  | UTR3        |                                                                                      | - | TtoG | 0.1    | 0.1818 | 5 | 2 | [11,11] |
| chr5:175719173  | KIAA1191  | UTR5        |                                                                                      | - | GtoT | 0.1    | 0.1176 | 5 | 2 | [17,20] |
| chr5:175719444  | KIAA1191  | UTR5        |                                                                                      | - | TtoG | 0.1    | 0.2    | 3 | 2 | [10,10] |
| chr5:175712996  | KIAA1191  | UTR5        |                                                                                      | - | AtoC | 0.125  | 0.1333 | 2 | 2 | [15,16] |
| chr20:36594859  | KIAA1219  | coding_exon | ENST00000262879:TtoA;ENST00000304939:TtoA;ENST00000397038:TtoA;ENST00000262879:StoA; | + | AtoG | 0.1    | 0.1    | 2 | 2 | [10,10] |
| chr20:36636966  | KIAA1219  | coding_exon | ENST00000262879:StoA;ENST00000304939:StoA;ENST00000397038:StoA;ENST00000262879:StoD; | + | AtoC | 0.1    | 0.1    | 2 | 2 | [10,10] |
| chr10:70445416  | KIAA1279  | coding_exon |                                                                                      | + | TtoC | 0.1    | 0.1333 | 3 | 2 | [10,15] |
| chr2:96634297   | KIAA1310  | coding_exon | ENST00000354204:LtoP;ENST00000421845:LtoP;ENST00000431828:LtoP;ENST00000354204:StoP; | - | TtoC | 0.1    | 0.1    | 2 | 2 | [10,10] |
| chr2:96633816   | KIAA1310  | coding_exon | ENST00000354204:AtoS;ENST00000421845:AtoS;ENST00000431828:AtoS;ENST00000354204:StoA; | - | GtoA | 0.1    | 0.1538 | 5 | 2 | [10,13] |
| chr8:95612422   | KIAA1429  | coding_exon |                                                                                      | - | TtoC | 0.1    | 0.1    | 2 | 2 | [10,10] |
| chr8:95571473   | KIAA1429  | mixed       |                                                                                      | - | TtoC | 0.1    | 0.1429 | 4 | 2 | [20,21] |
| chr8:95576267   | KIAA1429  | mixed       |                                                                                      | - | TtoA | 0.1    | 0.1667 | 5 | 2 | [10,12] |
| chr8:95577771   | KIAA1429  | mixed       |                                                                                      | - | TtoC | 0.1    | 0.1364 | 2 | 2 | [10,22] |
| chr4:186348889  | KIAA1430  | coding_exon |                                                                                      | - | TtoA | 0.1    | 0.1176 | 4 | 2 | [10,35] |
| chr4:186318571  | KIAA1430  | UTR3        |                                                                                      | - | AtoC | 0.125  | 0.1579 | 2 | 2 | [16,19] |
| chr4:186320622  | KIAA1430  | UTR3        |                                                                                      | - | TtoC | 0.1538 | 0.2727 | 3 | 3 | [11,15] |
| chr9:5736004    | KIAA1432  | coding_exon | ENST00000251879:DtoA;ENST00000381532:DtoA;ENST00000414202:DtoA;ENST00000251879:StoA; | + | AtoC | 0.1    | 0.1    | 2 | 2 | [10,10] |
| chr9:5764613    | KIAA1432  | UTR3        |                                                                                      | + | TtoC | 0.1    | 0.1    | 6 | 2 | [10,10] |
| chr9:5764741    | KIAA1432  | UTR3        |                                                                                      | + | TtoC | 0.1    | 0.125  | 5 | 2 | [11,16] |
| chr11:93103115  | KIAA1731  | UTR3        |                                                                                      | + | TtoC | 0.1    | 0.2    | 2 | 2 | [10,10] |
| chr11:93103163  | KIAA1731  | UTR3        |                                                                                      | + | AtoT | 0.1    | 0.125  | 2 | 2 | [10,16] |
| chr11:93103168  | KIAA1731  | UTR3        |                                                                                      | + | AtoG | 0.1    | 0.1176 | 6 | 2 | [11,18] |
| chr14:76650885  | KIAA1737  | UTR3        |                                                                                      | + | GtoT | 0.1    | 0.2    | 3 | 2 | [10,10] |
| chr9:20913760   | KIAA1797  | coding_exon | ENST00000338382:LtoR;ENST00000380249:LtoR;                                           | + | TtoG | 0.1    | 0.1667 | 5 | 3 | [10,20] |
| chr11:105385761 | KIAA1826  | coding_exon | ENST00000301919:LtoR;                                                                | - | TtoG | 0.1    | 0.1333 | 6 | 3 | [11,20] |
| chr2:61224503   | KIAA1841  | mixed       |                                                                                      | + | AtoT | 0.1    | 0.1538 | 2 | 2 | [10,13] |
| chr8:22520142   | KIAA1967  | coding_exon |                                                                                      | + | CtoT | 0.1    | 0.1379 | 4 | 2 | [10,29] |
| chr1:11902346   | KIAA2013  | UTR3        |                                                                                      | - | AtoG | 0.1    | 0.1053 | 3 | 2 | [10,19] |

|                 |           |             |                                                                        |   |      |        |        |    |   |         |
|-----------------|-----------|-------------|------------------------------------------------------------------------|---|------|--------|--------|----|---|---------|
| chr9:5958025    | KIAA2026  | mixed       |                                                                        | - | AtoG | 0.1    | 0.1    | 3  | 2 | [10,10] |
| chr2:8788824    | KIDINS220 | coding_exon | ENST00000256707:StoY;ENST00000418530:StoY;ENST00000427284:StoY;ENST000 | - | CtoA | 0.1    | 0.1    | 2  | 2 | [10,10] |
| chr2:8794529    | KIDINS220 | coding_exon | ENST00000256707:DtoH;ENST00000418530:DtoH;ENST00000427284:DtoH;ENST000 | - | GtoC | 0.1    | 0.1    | 3  | 2 | [10,10] |
| chr10:94403522  | KIF11     | coding_exon | ENST00000260731:IttoV;                                                 | + | AtoG | 0.1    | 0.1176 | 2  | 2 | [10,17] |
| chr10:94362855  | KIF11     | coding_exon |                                                                        | + | AtoC | 0.1    | 0.1053 | 3  | 2 | [10,19] |
| chr3:44869190   | KIF15     | coding_exon | ENST00000326047:Etok;ENST00000425755:Etok;                             | + | GtoA | 0.1    | 0.2143 | 2  | 2 | [10,14] |
| chr11:28013510  | KIF18A    | coding_exon | ENST00000263181:StoT;                                                  | - | GtoC | 0.1    | 0.2    | 2  | 2 | [10,10] |
| chr17:40367149  | KIF18B    | coding_exon | ENST00000339151:LtoR;ENST00000376982:LtoR;ENST00000438933:LtoR;        | - | TtoG | 0.1    | 0.1111 | 3  | 2 | [10,18] |
| chr17:40359330  | KIF18B    | coding_exon |                                                                        | - | AtoG | 0.1    | 0.2    | 3  | 3 | [10,14] |
| chr17:40358936  | KIF18B    | UTR3        |                                                                        | - | AtoC | 0.1    | 0.1111 | 3  | 2 | [10,18] |
| chr1:10363946   | KIF1B     | UTR3        |                                                                        | + | TtoG | 0.1    | 0.1429 | 2  | 2 | [10,14] |
| chr17:4868723   | KIF1C     | UTR3        |                                                                        | + | GtoA | 0.1333 | 0.2143 | 3  | 3 | [10,15] |
| chr5:137549287  | KIF20A    | coding_exon | ENST00000394894:StoC;                                                  | + | CtoG | 0.1    | 0.1    | 2  | 2 | [10,10] |
| chr5:137549636  | KIF20A    | coding_exon | ENST00000394894:QtoR;                                                  | + | AtoG | 0.1    | 0.1429 | 5  | 2 | [10,14] |
| chr5:137546793  | KIF20A    | coding_exon | ENST00000394894:PtoR;                                                  | + | CtoG | 0.1    | 0.1    | 3  | 2 | [10,10] |
| chr10:91487558  | KIF20B    | coding_exon | ENST00000260753:TtoP;ENST00000371728:TtoP;ENST00000394289:TtoP;ENST000 | + | AtoC | 0.1    | 0.1667 | 2  | 2 | [10,12] |
| chr10:91504280  | KIF20B    | coding_exon | ENST00000260753:DtoG;ENST00000371728:DtoG;ENST00000394289:DtoG;ENST000 | + | AtoG | 0.1    | 0.1176 | 2  | 2 | [10,17] |
| chr10:91493568  | KIF20B    | coding_exon | ENST00000260753:DtoE;ENST00000371728:DtoE;ENST00000394289:DtoE;ENST000 | + | TtoA | 0.1429 | 0.1818 | 4  | 2 | [11,15] |
| chr10:91488022  | KIF20B    | coding_exon |                                                                        | + | GtoT | 0.1    | 0.1    | 2  | 2 | [10,10] |
| chr10:91488043  | KIF20B    | coding_exon |                                                                        | + | TtoC | 0.1    | 0.1176 | 3  | 2 | [17,20] |
| chr12:38031931  | KIF21A    | coding_exon | ENST00000341813:StoP;ENST00000361418:StoP;ENST00000361961:StoP;ENST000 | - | TtoC | 0.1    | 0.1    | 2  | 2 | [10,10] |
| chr12:38013324  | KIF21A    | coding_exon | ENST00000341813:QtoR;ENST00000361418:QtoR;ENST00000361961:QtoR;ENST000 | - | AtoG | 0.1    | 0.2    | 6  | 4 | [10,12] |
| chr12:38046539  | KIF21A    | coding_exon | ENST00000341813:NtoK;ENST00000361418:NtoK;ENST00000361961:NtoK;ENST000 | - | TtoG | 0.1    | 0.125  | 3  | 2 | [10,16] |
| chr12:38020319  | KIF21A    | coding_exon | ENST00000341813:HtoR;ENST00000361418:HtoR;ENST00000361961:HtoR;ENST000 | - | AtoG | 0.1    | 0.1    | 2  | 2 | [10,10] |
| chr12:37987750  | KIF21A    | coding_exon |                                                                        | - | TtoC | 0.1    | 0.1    | 3  | 2 | [10,10] |
| chr12:37973565  | KIF21A    | UTR3        |                                                                        | - | AtoG | 0.1    | 0.1    | 2  | 2 | [10,10] |
| chr12:37974360  | KIF21A    | UTR3        |                                                                        | - | CtoA | 0.1    | 0.1    | 2  | 2 | [10,10] |
| chr1:199235186  | KIF21B    | coding_exon | ENST00000332129:Etog;                                                  | - | AtoG | 0.1    | 0.1    | 2  | 2 | [10,10] |
| chr15:67526277  | KIF23     | coding_exon | ENST00000260363:VtoG;ENST00000352331:VtoG;                             | + | TtoG | 0.1154 | 0.2    | 4  | 3 | [15,26] |
| chr15:67514877  | KIF23     | coding_exon |                                                                        | + | TtoC | 0.1    | 0.1429 | 4  | 2 | [10,14] |
| chr15:67532211  | KIF23     | mixed       |                                                                        | + | CtoG | 0.2222 | 0.6    | 4  | 4 | [10,19] |
| chr15:67532212  | KIF23     | mixed       |                                                                        | + | CtoG | 0.2    | 0.5    | 5  | 3 | [15,16] |
| chr15:67532214  | KIF23     | mixed       |                                                                        | + | CtoT | 0.1034 | 0.2    | 8  | 5 | [10,48] |
| chr5:61689727   | KIF2A     | coding_exon | ENST00000230731:QtoR;ENST00000381103:QtoR;ENST0000041507:QtoR;ENST000  | + | AtoG | 0.1    | 0.1    | 2  | 2 | [10,10] |
| chr5:61717821   | KIF2A     | UTR3        |                                                                        | + | AtoC | 0.125  | 0.1818 | 8  | 3 | [11,24] |
| chr5:132065690  | KIF3A     | coding_exon |                                                                        | - | TtoC | 0.1    | 0.2    | 5  | 4 | [10,25] |
| chr20:30384767  | KIF3B     | UTR3        |                                                                        | + | TtoG | 0.1333 | 0.1333 | 3  | 2 | [15,15] |
| chr10:32338719  | KIF5B     | UTR3        |                                                                        | - | AtoG | 0.1    | 0.2    | 4  | 2 | [10,15] |
| chr10:32339710  | KIF5B     | UTR3        |                                                                        | - | TtoG | 0.1    | 0.2    | 3  | 2 | [10,11] |
| chr10:7841859   | KIN       | coding_exon |                                                                        | - | TtoC | 0.1    | 0.1    | 3  | 2 | [10,10] |
| chr8:103731200  | KLF10     | UTR3        |                                                                        | - | CtoT | 0.1    | 0.1538 | 2  | 2 | [10,13] |
| chr8:103731343  | KLF10     | UTR3        |                                                                        | - | AtoG | 0.1    | 0.1905 | 7  | 2 | [10,21] |
| chr13:73167108  | KLF12     | UTR3        |                                                                        | - | TtoC | 0.1    | 0.1    | 2  | 2 | [10,10] |
| chr15:29454013  | KLF13     | UTR3        |                                                                        | + | TtoC | 0.1053 | 0.1429 | 10 | 3 | [19,43] |
| chr15:29455786  | KLF13     | UTR3        |                                                                        | + | TtoG | 0.1    | 0.1053 | 6  | 2 | [10,19] |
| chr15:29457236  | KLF13     | UTR3        |                                                                        | + | TtoA | 0.1053 | 0.129  | 10 | 2 | [20,32] |
| chr15:29457263  | KLF13     | UTR3        |                                                                        | + | AtoG | 0.1176 | 0.1304 | 5  | 2 | [17,23] |
| chr19:1804264   | KLF16     | UTR3        |                                                                        | - | TtoG | 0.1    | 0.1    | 2  | 2 | [10,10] |
| chr19:1804529   | KLF16     | UTR3        |                                                                        | - | TtoG | 0.1    | 0.1538 | 2  | 2 | [10,13] |
| chr19:1805253   | KLF16     | UTR3        |                                                                        | - | CtoG | 0.1    | 0.2308 | 4  | 2 | [13,20] |
| chr7:12959247   | KLHDC10   | UTR3        |                                                                        | + | GtoT | 0.1    | 0.1    | 2  | 2 | [10,10] |
| chr14:49311100  | KLHDC2    | coding_exon | ENST00000298307:VtoE;                                                  | + | TtoA | 0.1    | 0.1    | 3  | 2 | [10,11] |
| chr14:49316786  | KLHDC2    | coding_exon |                                                                        | + | AtoG | 0.1    | 0.1    | 2  | 2 | [10,10] |
| chr1:888604     | KLHL17    | coding_exon |                                                                        | + | TtoG | 0.1    | 0.1    | 2  | 2 | [10,10] |
| chr3:47360511   | KLHL18    | UTR3        |                                                                        | + | AtoG | 0.1    | 0.1    | 3  | 2 | [10,10] |
| chr3:47360584   | KLHL18    | UTR3        |                                                                        | + | TtoC | 0.1    | 0.1111 | 6  | 2 | [10,10] |
| chr4:166454680  | KLHL2     | coding_exon |                                                                        | + | TtoG | 0.1    | 0.1429 | 3  | 2 | [10,15] |
| chr1:6573482    | KLHL21    | UTR3        |                                                                        | - | GtoA | 0.1    | 0.1667 | 2  | 2 | [10,12] |
| chr1:6573627    | KLHL21    | UTR3        |                                                                        | - | AtoC | 0.1    | 0.1    | 2  | 2 | [10,10] |
| chr5:136981207  | KLHL3     | UTR3        |                                                                        | - | TtoC | 0.1    | 0.1    | 2  | 2 | [10,10] |
| chr16:83253321  | KLHL36    | UTR3        |                                                                        | + | GtoA | 0.1    | 0.1333 | 3  | 2 | [10,15] |
| chr16:83258266  | KLHL36    | UTR3        |                                                                        | + | TtoA | 0.1    | 0.1176 | 5  | 3 | [10,18] |
| chr3:184694758  | KLHL6     | coding_exon | ENST00000341319:KtoE;                                                  | - | AtoG | 0.1    | 0.1    | 5  | 2 | [10,10] |
| chr7:23131991   | KLHL7     | mixed       |                                                                        | + | TtoC | 0.1    | 0.1538 | 3  | 2 | [13,20] |
| chr9:21321754   | KLHL9     | mixed       |                                                                        | - | AtoG | 0.1    | 0.1053 | 2  | 2 | [10,20] |
| chr2:48592111   | KLRAQ1    | mixed       |                                                                        | + | GtoA | 0.1    | 0.1    | 2  | 2 | [10,10] |
| chr2:48595587   | KLRAQ1    | UTR3        |                                                                        | + | TtoC | 0.1304 | 0.2    | 7  | 2 | [10,23] |
| chr12:121653180 | KNTC1     | coding_exon | ENST00000333479:TtoP;ENST00000436959:TtoP;                             | + | AtoC | 0.1    | 0.1875 | 2  | 2 | [10,17] |
| chr12:121623642 | KNTC1     | mixed       |                                                                        | + | GtoA | 0.1    | 0.1    | 2  | 2 | [10,20] |
| chr12:121638256 | KNTC1     | mixed       |                                                                        | + | TtoA | 0.1    | 0.1176 | 2  | 2 | [10,17] |
| chr12:121676788 | KNTC1     | UTR3        |                                                                        | + | TtoA | 0.1    | 0.1538 | 2  | 2 | [10,13] |
| chr13:49204900  | KPNA3     | mixed       |                                                                        | - | TtoA | 0.1    | 0.2    | 2  | 2 | [10,10] |
| chr13:49171943  | KPNA3     | UTR3        |                                                                        | - | GtoA | 0.4483 | 0.5625 | 2  | 2 | [29,32] |
| chr3:161696147  | KPNA4     | UTR3        |                                                                        | - | TtoC | 0.1    | 0.1    | 2  | 2 | [10,10] |
| chr1:32405361   | KPNA6     | coding_exon | ENST00000373625:VtoG;                                                  | + | TtoG | 0.1    | 0.1818 | 3  | 2 | [10,11] |
| chr1:32409450   | KPNA6     | UTR3        |                                                                        | + | TtoC | 0.1    | 0.1    | 2  | 2 | [10,11] |
| chr2:88108978   | KRCC1     | mixed       |                                                                        | - | TtoC | 0.1053 | 0.1111 | 3  | 2 | [10,19] |
| chr2:88109082   | KRCC1     | mixed       |                                                                        | - | AtoC | 0.1    | 0.25   | 3  | 2 | [10,16] |
| chr2:88109135   | KRCC1     | mixed       |                                                                        | - | AtoT | 0.1    | 0.1    | 2  | 2 | [10,10] |
| chr7:91680450   | KRIT1     | mixed       |                                                                        | - | AtoG | 0.1    | 0.1    | 2  | 2 | [10,10] |
| chr12:74183976  | KRR1      | coding_exon | ENST00000229214:FtoS;                                                  | - | TtoC | 0.1    | 0.1765 | 4  | 2 | [10,17] |
| chr12:74186446  | KRR1      | coding_exon | ENST00000229214:Atot;ENST00000438169:Atot;                             | - | GtoA | 0.1111 | 0.1875 | 3  | 2 | [16,18] |
| chr12:74186445  | KRR1      | coding_exon | ENST00000229214:Atog;ENST00000438169:Atog;                             | - | CtoG | 0.1    | 0.1333 | 4  | 2 | [15,20] |
| chr17:36228026  | KRT10     | UTR3        |                                                                        | - | TtoA | 0.1    | 0.1429 | 6  | 3 | [10,20] |
| chr12:50928679  | KRT7      | coding_exon |                                                                        | + | TtoG | 0.1333 | 0.1667 | 7  | 2 | [12,15] |
| chr1:153408534  | KRTCAP2   | UTR3        |                                                                        | - | AtoG | 0.1    | 0.3125 | 5  | 3 | [11,16] |
| chr17:22952550  | KSR1      | mixed       |                                                                        | + | TtoC | 0.1053 | 0.4167 | 6  | 5 | [11,19] |
| chr17:22956639  | KSR1      | mixed       |                                                                        | + | TtoC | 0.1    | 0.15   | 4  | 2 | [10,20] |
| chr17:22974697  | KSR1      | mixed       |                                                                        | + | AtoG | 0.1    | 0.1    | 2  | 2 | [10,10] |
| chr17:22975111  | KSR1      | mixed       |                                                                        | + | AtoG | 0.1    | 0.2    | 5  | 3 | [10,20] |
| chr3:120694659  | KTELC1    | UTR3        |                                                                        | + | TtoA | 0.1    | 0.25   | 2  | 2 | [10,12] |
| chr14:55148640  | KTN1      | coding_exon | ENST00000334975:QtoK;ENST00000356229:QtoK;ENST00000395308:QtoK;ENST000 | + | CtoA | 0.1    | 0.1053 | 7  | 3 | [20,76] |
| chr14:55220660  | KTN1      | UTR3        |                                                                        | + | TtoG | 0.1    | 0.1053 | 2  | 2 | [10,19] |
| chr22:39939871  | L3MBTL2   | coding_exon |                                                                        | + | TtoA | 0.1    | 0.1429 | 4  | 2 | [10,14] |
| chr8:17132643   | LACTB2    | coding_exon |                                                                        | - | AtoG | 0.1    | 0.1333 | 2  | 2 | [10,15] |
| chr12:6754912   | LAG3      | coding_exon | ENST00000203629:TtoP;ENST00000441671:TtoP;                             | + | AtoC | 0.1364 | 0.1379 | 2  | 2 | [22,29] |



|                 |              |             |                                                                          |   |      |        |        |    |    |           |
|-----------------|--------------|-------------|--------------------------------------------------------------------------|---|------|--------|--------|----|----|-----------|
| chr19:59557461  | LAIR1        | UTR3        |                                                                          | - | CtoA | 0.15   | 0.4444 | 3  | 3  | [18,24]   |
| chr1:181353293  | LAMC1        | coding_exon |                                                                          | + | AtoG | 0.1    | 0.1    | 3  | 2  | [10,10]   |
| chr1:181380527  | LAMC1        | UTR3        |                                                                          | + | TtoA | 0.1    | 0.1    | 2  | 2  | [10,10]   |
| chr3:184324696  | LAMP3        | coding_exon | ENST00000265598:VtoA;ENST00000466939:VtoA;                               | - | TtoC | 0.12   | 0.1212 | 9  | 2  | [25,33]   |
| chr1:30977905   | LAPTM5       | UTR3        |                                                                          | - | TtoA | 0.3    | 0.4444 | 3  | 3  | [10,10]   |
| chr1:30977912   | LAPTM5       | UTR3        |                                                                          | - | AtoG | 0.1    | 0.1846 | 15 | 13 | [65,567]  |
| chr1:30978575   | LAPTM5       | UTR3        |                                                                          | - | TtoA | 0.1117 | 0.1643 | 12 | 3  | [149,191] |
| chr5:154173702  | LARP1        | coding_exon |                                                                          | + | TtoG | 0.1053 | 0.1385 | 2  | 2  | [19,65]   |
| chr5:154174105  | LARP1        | UTR3        |                                                                          | + | GtoA | 0.1026 | 0.25   | 10 | 4  | [12,40]   |
| chr5:154174106  | LARP1        | UTR3        |                                                                          | + | GtoA | 0.1    | 0.1538 | 10 | 3  | [13,23]   |
| chr5:154175469  | LARP1        | UTR3        |                                                                          | + | TtoG | 0.1957 | 0.2222 | 3  | 2  | [19,48]   |
| chr5:154176265  | LARP1        | UTR3        |                                                                          | + | AtoG | 0.1429 | 0.2    | 5  | 2  | [15,20]   |
| chr5:154177172  | LARP1        | UTR3        |                                                                          | + | AtoG | 0.1034 | 0.1538 | 9  | 3  | [13,29]   |
| chr12:49107814  | LARP4        | mixed       |                                                                          | + | GtoT | 0.1538 | 0.1765 | 3  | 2  | [13,17]   |
| chr12:49107815  | LARP4        | mixed       |                                                                          | + | GtoT | 0.1    | 0.1667 | 3  | 3  | [10,16]   |
| chr10:846092    | LARP4B       | UTR3        |                                                                          | - | AtoG | 0.1    | 0.1    | 5  | 3  | [10,10]   |
| chr4:113788295  | LARP7        | coding_exon | ENST00000324052:DtoA;ENST00000344442:DtoA;                               | + | AtoC | 0.1    | 0.1    | 2  | 2  | [10,10]   |
| chr4:113793691  | LARP7        | coding_exon | ENST00000324052:AtoS;ENST00000344442:AtoS;                               | + | GtoT | 0.1053 | 0.1333 | 4  | 2  | [15,19]   |
| chr5:145489883  | LARS         | coding_exon | ENST00000394434:VtoG;                                                    | - | TtoG | 0.1042 | 0.1875 | 7  | 4  | [16,48]   |
| chr3:45534442   | LARS2        | coding_exon | ENST00000265537:Wto*;ENST00000414984:Wto*;ENST00000415258:Wto*;          | + | GtoA | 0.1    | 0.1    | 3  | 2  | [10,10]   |
| chr3:45564417   | LARS2        | UTR3        |                                                                          | + | TtoG | 0.1    | 0.1    | 4  | 2  | [10,10]   |
| chr17:34328812  | LASP1        | mixed       |                                                                          | + | AtoG | 0.141  | 0.1765 | 4  | 3  | [51,81]   |
| chr17:34331547  | LASP1        | UTR3        |                                                                          | + | GtoA | 0.2    | 0.5455 | 6  | 6  | [10,14]   |
| chr19:8181744   | LASS4        | UTR5        |                                                                          | + | GtoC | 0.1818 | 0.25   | 3  | 3  | [10,12]   |
| chr2:16939599   | LASS6        | UTR3        |                                                                          | + | AtoG | 0.1    | 0.1    | 2  | 2  | [10,10]   |
| chr1:223678358  | LBR          | coding_exon |                                                                          | - | CtoA | 0.1    | 0.1    | 2  | 2  | [10,20]   |
| chr1:223656148  | LBR          | UTR3        |                                                                          | - | TtoC | 0.1    | 0.1212 | 10 | 5  | [20,36]   |
| chr15:41408221  | LCMT2        | coding_exon | ENST00000305641:YtoD;                                                    | - | TtoG | 0.1    | 0.2    | 2  | 2  | [10,10]   |
| chr13:45630661  | LCP1         | coding_exon | ENST00000323076:StoA;ENST00000398576:StoA;                               | - | TtoG | 0.1053 | 0.125  | 2  | 2  | [19,24]   |
| chr5:169608317  | LCP2         | coding_exon | ENST00000046794:YtoD;                                                    | - | TtoG | 0.125  | 0.1579 | 2  | 2  | [16,19]   |
| chr5:169608315  | LCP2         | coding_exon |                                                                          | - | CtoT | 0.1333 | 0.15   | 2  | 2  | [15,20]   |
| chr10:103858777 | LDB1         | coding_exon | ENST00000361198:PtoH;ENST00000419270:PtoH;ENST00000425280:PtoH;          | - | CtoA | 0.1053 | 0.15   | 8  | 5  | [19,54]   |
| chr10:103858776 | LDB1         | coding_exon |                                                                          | - | TtoG | 0.1    | 0.1905 | 9  | 4  | [21,57]   |
| chr10:103870090 | LDB1         | UTR5        |                                                                          | - | GtoA | 0.1    | 0.25   | 2  | 2  | [10,12]   |
| chr11:18377641  | LDHA         | coding_exon | ENST00000227157:LtoI;ENST00000379412:LtoI;ENST00000396222:LtoI;ENST00000 | + | CtoA | 0.1429 | 0.1429 | 7  | 2  | [21,100]  |
| chr11:18377652  | LDHA         | coding_exon |                                                                          | + | AtoG | 0.1029 | 0.144  | 12 | 7  | [24,153]  |
| chr11:18385970  | LDHA         | UTR3        |                                                                          | + | AtoG | 0.1045 | 0.3478 | 10 | 10 | [42,298]  |
| chr11:18385971  | LDHA         | UTR3        |                                                                          | + | CtoA | 0.5455 | 1      | 12 | 12 | [11,75]   |
| chr11:18385972  | LDHA         | UTR3        |                                                                          | + | TtoA | 0.75   | 0.8333 | 4  | 4  | [13,24]   |
| chr12:21679544  | LDHB         | UTR3        |                                                                          | - | TtoC | 0.125  | 0.1429 | 5  | 2  | [14,16]   |
| chr12:21679546  | LDHB         | UTR3        |                                                                          | - | TtoC | 0.1    | 0.3333 | 6  | 3  | [10,12]   |
| chr19:11103991  | LDLR         | UTR3        |                                                                          | + | AtoC | 0.1176 | 0.1429 | 5  | 2  | [14,17]   |
| chr12:63920063  | LEMD3        | coding_exon | ENST00000308330:VtoA;                                                    | + | TtoC | 0.1    | 0.1333 | 2  | 2  | [10,15]   |
| chr12:63918816  | LEMD3        | coding_exon | ENST00000308330:RtoS;                                                    | + | CtoA | 0.1    | 0.1    | 2  | 2  | [10,10]   |
| chr12:63850681  | LEMD3        | coding_exon |                                                                          | + | TtoC | 0.1    | 0.1    | 2  | 2  | [10,10]   |
| chr12:63926554  | LEMD3        | UTR3        |                                                                          | + | TtoC | 0.1    | 0.1    | 3  | 2  | [10,10]   |
| chr19:60294099  | LENG3        | UTR3        |                                                                          | - | CtoA | 0.1    | 0.1667 | 2  | 2  | [10,12]   |
| chr19:59658518  | LENG8        | coding_exon | ENST00000301196:StoP;ENST00000326764:StoP;ENST00000376526:StoP;ENST000   | + | TtoC | 0.1364 | 0.1667 | 3  | 2  | [18,22]   |
| chr19:59664777  | LENG8        | mixed       |                                                                          | + | TtoA | 0.1    | 0.1    | 3  | 2  | [10,10]   |
| chr19:59652262  | LENG8        | UTR5        |                                                                          | + | TtoG | 0.1    | 0.125  | 3  | 2  | [10,16]   |
| chr15:50045844  | LEO1         | coding_exon | ENST00000299601:GtoR;ENST00000315141:GtoR;                               | - | GtoA | 0.1333 | 0.2    | 4  | 2  | [10,15]   |
| chr15:50045713  | LEO1         | coding_exon |                                                                          | - | TtoA | 0.1    | 0.1538 | 3  | 2  | [10,13]   |
| chr1:42993246   | LEPRE1       | coding_exon | ENST00000236040:Sto*;ENST00000296388:Sto*;                               | - | CtoG | 0.1667 | 0.2727 | 2  | 2  | [11,12]   |
| chr3:191195925  | LEPREL1      | mixed       |                                                                          | - | CtoG | 0.1    | 0.2    | 3  | 3  | [10,27]   |
| chr8:30081372   | LEPROTL1     | coding_exon | ENST00000321250:LtoH;ENST00000442880:LtoH;                               | + | TtoA | 0.1    | 0.1111 | 4  | 2  | [10,10]   |
| chr8:30083834   | LEPROTL1     | mixed       |                                                                          | + | GtoA | 0.1    | 0.1    | 2  | 2  | [10,10]   |
| chr8:30084741   | LEPROTL1     | mixed       |                                                                          | + | GtoT | 0.1    | 0.1    | 3  | 2  | [10,10]   |
| chr4:1812996    | LETM1        | coding_exon | ENST00000302787:VtoG;                                                    | - | TtoG | 0.125  | 0.1538 | 2  | 2  | [13,16]   |
| chr4:1813173    | LETM1        | coding_exon | ENST00000302787:VtoG;                                                    | - | TtoG | 0.1    | 0.1852 | 6  | 2  | [10,27]   |
| chr4:1813257    | LETM1        | coding_exon | ENST00000302787:LtoP;                                                    | - | TtoC | 0.1053 | 0.1111 | 3  | 2  | [18,19]   |
| chr12:49732207  | LETMD1       | coding_exon | ENST00000262055:NtoD;ENST00000418425:NtoD;ENST00000448283:NtoD;          | + | AtoG | 0.1    | 0.1818 | 2  | 2  | [10,11]   |
| chr22:36405751  | LGALS1       | UTR3        |                                                                          | + | CtoG | 0.16   | 0.2727 | 4  | 2  | [11,26]   |
| chr22:36405752  | LGALS1       | UTR3        |                                                                          | + | TtoG | 0.3    | 0.5    | 3  | 3  | [10,16]   |
| chr22:36401596  | LGALS1       | UTR5        |                                                                          | + | TtoC | 0.1111 | 0.1786 | 2  | 2  | [10,28]   |
| chr22:36401597  | LGALS1       | UTR5        |                                                                          | + | CtoA | 0.125  | 0.1538 | 2  | 2  | [13,17]   |
| chr14:54681755  | LGALS3       | UTR3        |                                                                          | + | AtoG | 0.1    | 0.1667 | 5  | 2  | [10,12]   |
| chr1:234778153  | LGALS8       | UTR3        |                                                                          | + | GtoA | 0.1053 | 0.1875 | 5  | 4  | [16,25]   |
| chr1:234780604  | LGALS8       | UTR3        |                                                                          | + | TtoC | 0.1    | 0.1053 | 2  | 2  | [10,19]   |
| chr1:204831661  | LGTN         | UTR3        |                                                                          | - | AtoG | 0.1    | 0.2727 | 12 | 6  | [11,18]   |
| chr1:204831675  | LGTN         | UTR3        |                                                                          | - | TtoA | 0.125  | 0.1818 | 9  | 3  | [11,32]   |
| chr5:77820329   | LHFPL2       | UTR3        |                                                                          | - | AtoG | 0.1176 | 0.125  | 4  | 2  | [16,17]   |
| chr4:39141595   | LIAS         | coding_exon | ENST00000261434:YtoS;ENST00000340169:YtoS;ENST00000381846:YtoS;ENST000   | + | AtoC | 0.1429 | 0.1667 | 2  | 2  | [12,14]   |
| chr4:39141600   | LIAS         | coding_exon | ENST00000261434:TtoP;ENST00000340169:TtoP;ENST00000381846:TtoP;ENST000   | + | AtoC | 0.1538 | 0.2222 | 5  | 2  | [13,18]   |
| chr4:39149312   | LIAS         | mixed       |                                                                          | + | TtoC | 0.1    | 0.1    | 2  | 2  | [10,10]   |
| chr19:53346407  | LIG1         | coding_exon |                                                                          | - | AtoG | 0.1    | 0.1282 | 4  | 2  | [30,39]   |
| chr19:53310547  | LIG1         | UTR3        |                                                                          | - | TtoC | 0.1    | 0.14   | 7  | 3  | [10,50]   |
| chr17:30348953  | LIG3         | coding_exon | ENST00000262327:VtoA;ENST00000378526:VtoA;                               | + | TtoC | 0.1    | 0.1    | 3  | 2  | [10,10]   |
| chr17:30343100  | LIG3         | coding_exon | ENST00000262327:NtoD;ENST00000378526:NtoD;                               | + | AtoG | 0.1    | 0.1    | 2  | 2  | [10,10]   |
| chr17:30334205  | LIG3         | coding_exon | ENST00000262327:LtoQ;ENST00000378526:LtoQ;                               | + | TtoA | 0.1111 | 0.2    | 3  | 2  | [10,10]   |
| chr17:30340763  | LIG3         | coding_exon | ENST00000262327:IttoT;ENST00000378526:IttoT;                             | + | TtoC | 0.1    | 0.1    | 2  | 2  | [10,10]   |
| chr17:30355645  | LIG3         | UTR3        |                                                                          | + | TtoA | 0.1    | 0.1    | 3  | 2  | [10,10]   |
| chr12:48857996  | LIMA1        | coding_exon |                                                                          | - | AtoG | 0.1    | 0.1    | 4  | 2  | [10,20]   |
| chr12:48855949  | LIMA1        | UTR3        |                                                                          | - | AtoG | 0.1    | 0.1818 | 5  | 2  | [10,11]   |
| chr12:48856854  | LIMA1        | UTR3        |                                                                          | - | TtoC | 0.1    | 0.1    | 3  | 2  | [10,20]   |
| chr20:61838489  | LIME1        | UTR5        |                                                                          | + | GtoA | 0.1    | 0.1    | 3  | 3  | [10,10]   |
| chr7:73173273   | LIMK1        | coding_exon | ENST00000336180:YtoF;ENST00000418310:YtoF;                               | + | AtoT | 1      | 1      | 13 | 13 | [11,80]   |
| chr7:73174283   | LIMK1        | UTR3        |                                                                          | + | CtoT | 0.375  | 0.5    | 2  | 2  | [56,74]   |
| chr22:29985175  | LIMK2        | coding_exon |                                                                          | + | TtoC | 0.1    | 0.1429 | 2  | 2  | [10,14]   |
| chr14:73735481  | LIN52        | UTR3        |                                                                          | + | TtoC | 0.1053 | 0.125  | 3  | 2  | [16,19]   |
| chr10:91152641  | LIPA         | coding_exon |                                                                          | - | AtoG | 0.1    | 0.2143 | 3  | 2  | [10,14]   |
| chr16:11550849  | LITAF        | mixed       |                                                                          | - | TtoC | 0.1    | 0.1149 | 9  | 2  | [87,121]  |
| chr16:11549965  | LITAF        | UTR3        |                                                                          | - | TtoC | 0.1071 | 0.1818 | 10 | 3  | [11,29]   |
| chr1:144212896  | LIX1L        | UTR3        |                                                                          | + | AtoG | 0.1    | 0.1818 | 5  | 3  | [10,11]   |
| chr22:21003526  | 22NC03-80A10 | mixed       |                                                                          | + | CtoG | 0.4667 | 0.8438 | 2  | 2  | [15,64]   |
| chr22:21003534  | 22NC03-80A10 | mixed       |                                                                          | + | TtoC | 0.25   | 0.5714 | 2  | 2  | [14,16]   |
| chr12:64803960  | LIPH         | coding_exon | ENST00000266604:KtoT;                                                    | - | AtoC | 0.1009 | 0.102  | 8  | 2  | [49,109]  |

|                |        |             |                                                                                                                                                     |   |      |        |        |    |    |          |
|----------------|--------|-------------|-----------------------------------------------------------------------------------------------------------------------------------------------------|---|------|--------|--------|----|----|----------|
| chr12:64804041 | LLPH   | coding_exon | ENST00000266604:Itot;                                                                                                                               | - | TtoC | 0.1    | 0.2258 | 11 | 5  | [18,62]  |
| chr12:64803612 | LLPH   | UTR3        |                                                                                                                                                     | - | AtoG | 0.1333 | 0.2    | 3  | 2  | [10,15]  |
| chr18:55147922 | LMAN1  | UTR3        |                                                                                                                                                     | - | AtoG | 0.1429 | 0.2    | 4  | 2  | [20,21]  |
| chr5:176691179 | LMAN2  | UTR3        |                                                                                                                                                     | - | AtoG | 0.1    | 0.1333 | 4  | 2  | [11,16]  |
| chr5:176691627 | LMAN2  | UTR3        |                                                                                                                                                     | - | AtoG | 0.1    | 0.1667 | 5  | 3  | [11,18]  |
| chr2:96736499  | LMAN2L | UTR3        |                                                                                                                                                     | - | TtoC | 0.1    | 0.1    | 2  | 2  | [10,10]  |
| chr2:96736677  | LMAN2L | UTR3        |                                                                                                                                                     | - | TtoG | 0.1    | 0.1    | 3  | 2  | [10,10]  |
| chr7:156169603 | LMBR1  | coding_exon | ENST00000316198:HtoP;ENST00000347571:HtoP;ENST00000353442:HtoP;ENST00000370570:VtoL;ENST00000370577:VtoL;                                           | - | AtoC | 0.1    | 0.1    | 2  | 2  | [10,10]  |
| chr6:70485601  | LMBRD1 | coding_exon | ENST00000370570:VtoL;ENST00000370577:VtoL;                                                                                                          | - | GtoT | 0.1    | 0.1    | 3  | 2  | [10,10]  |
| chr3:8553937   | LMCD1  | mixed       |                                                                                                                                                     | + | TtoC | 0.1    | 0.1667 | 3  | 2  | [10,12]  |
| chr11:33837092 | LMO2   | UTR3        |                                                                                                                                                     | - | AtoG | 0.1    | 0.12   | 3  | 3  | [10,25]  |
| chr1:87583556  | LMO4   | UTR3        |                                                                                                                                                     | + | TtoA | 0.1    | 0.1765 | 8  | 3  | [10,22]  |
| chr5:96341273  | LNPEP  | coding_exon | ENST00000231368:AtoD;ENST00000379870:AtoD;ENST00000395770:AtoD;ENST00000396395:UtoA;                                                                | + | CtoA | 0.1    | 0.1    | 2  | 2  | [10,10]  |
| chr5:96395815  | LNPEP  | UTR3        |                                                                                                                                                     | + | TtoC | 0.1    | 0.1    | 2  | 2  | [10,10]  |
| chr5:96398142  | LNPEP  | UTR3        |                                                                                                                                                     | + | TtoG | 0.1176 | 0.1429 | 2  | 2  | [14,17]  |
| chr19:5670776  | LONP1  | coding_exon | ENST00000358403:HtoP;ENST00000360614:HtoP;                                                                                                          | - | AtoC | 0.1667 | 0.3571 | 4  | 2  | [15,18]  |
| chr16:46843599 | LONP2  | coding_exon | ENST00000285737:HtoR;ENST00000416006:HtoR;                                                                                                          | + | AtoG | 0.1    | 0.1    | 3  | 2  | [10,10]  |
| chr16:46943219 | LONP2  | UTR3        |                                                                                                                                                     | + | AtoG | 0.1111 | 0.1333 | 7  | 2  | [15,18]  |
| chr16:46943360 | LONP2  | UTR3        |                                                                                                                                                     | + | TtoA | 0.1    | 0.1333 | 3  | 2  | [10,16]  |
| chr19:19596300 | LPAR2  | coding_exon | ENST00000407877:LtoP;                                                                                                                               | - | TtoC | 0.1    | 0.1    | 3  | 2  | [10,20]  |
| chr5:1514542   | LPCAT1 | UTR3        |                                                                                                                                                     | - | AtoG | 0.1    | 0.1333 | 2  | 2  | [10,15]  |
| chr15:32443698 | LPCAT4 | coding_exon | ENST00000314891:KtoE;                                                                                                                               | - | AtoG | 0.1034 | 0.1333 | 4  | 3  | [16,29]  |
| chr1:210023225 | LPGAT1 | coding_exon |                                                                                                                                                     | - | AtoC | 0.1    | 0.1    | 2  | 2  | [10,10]  |
| chr1:209985691 | LPGAT1 | UTR3        |                                                                                                                                                     | - | TtoC | 0.1111 | 0.1304 | 3  | 2  | [18,23]  |
| chr1:209986229 | LPGAT1 | UTR3        |                                                                                                                                                     | - | TtoC | 0.1111 | 0.125  | 7  | 3  | [16,18]  |
| chr1:209986988 | LPGAT1 | UTR3        |                                                                                                                                                     | - | TtoC | 0.1    | 0.1    | 2  | 2  | [10,10]  |
| chr1:209988099 | LPGAT1 | UTR3        |                                                                                                                                                     | - | TtoG | 0.1    | 0.1    | 2  | 2  | [10,11]  |
| chr1:209988748 | LPGAT1 | UTR3        |                                                                                                                                                     | - | AtoT | 0.1    | 0.1    | 2  | 2  | [10,10]  |
| chr18:2929544  | LPIN2  | coding_exon |                                                                                                                                                     | - | GtoA | 0.1    | 0.1    | 4  | 2  | [10,10]  |
| chr18:2908112  | LPIN2  | UTR3        |                                                                                                                                                     | - | TtoG | 0.1    | 0.1053 | 7  | 3  | [10,19]  |
| chr18:2909346  | LPIN2  | UTR3        |                                                                                                                                                     | - | GtoA | 0.2308 | 0.2727 | 2  | 2  | [11,13]  |
| chr11:58051340 | LPXN   | UTR3        |                                                                                                                                                     | - | TtoG | 0.1    | 0.1724 | 4  | 3  | [20,40]  |
| chr4:151948934 | LRBA   | coding_exon | ENST00000357115:VtoA;                                                                                                                               | - | TtoC | 0.1    | 0.125  | 5  | 3  | [10,32]  |
| chr4:151406265 | LRBA   | UTR3        |                                                                                                                                                     | - | TtoA | 0.1    | 0.1538 | 5  | 2  | [10,13]  |
| chr13:46223076 | LRCH1  | UTR3        |                                                                                                                                                     | + | AtoC | 0.1818 | 0.25   | 4  | 2  | [11,12]  |
| chr13:46223596 | LRCH1  | UTR3        |                                                                                                                                                     | + | AtoG | 0.1    | 0.1053 | 3  | 2  | [10,19]  |
| chr3:199043543 | LRCH3  | coding_exon | ENST00000334859:YtoN;ENST00000414675:YtoN;ENST00000425562:YtoN;ENST00000425562:StoC;ENST00000425562:StoC;ENST00000425562:StoC;ENST00000425562:StoC; | + | TtoA | 0.1    | 0.2    | 4  | 2  | [10,10]  |
| chr3:199026319 | LRCH3  | coding_exon | ENST00000334859:StoC;ENST00000414675:StoC;ENST00000425562:StoC;ENST00000425562:StoC;ENST00000425562:StoC;ENST00000425562:StoC;                      | + | AtoT | 0.1429 | 0.1538 | 2  | 2  | [13,14]  |
| chr3:199087040 | LRCH3  | coding_exon |                                                                                                                                                     | + | TtoC | 0.125  | 0.1333 | 2  | 2  | [15,16]  |
| chr3:199097094 | LRCH3  | UTR3        |                                                                                                                                                     | + | AtoG | 0.1818 | 0.3    | 2  | 2  | [11,11]  |
| chr12:25096958 | LRMP   | UTR5        |                                                                                                                                                     | + | AtoG | 0.1    | 0.1333 | 2  | 2  | [10,15]  |
| chr2:44054452  | LRPPRC | coding_exon | ENST00000260665:LtoP;ENST00000409659:LtoP;ENST00000409946:LtoP;                                                                                     | - | TtoC | 0.1    | 0.1389 | 5  | 2  | [20,36]  |
| chr2:44055355  | LRPPRC | coding_exon | ENST00000260665:DtoG;ENST00000409659:DtoG;ENST00000409946:DtoG;                                                                                     | - | AtoG | 0.1111 | 0.1429 | 3  | 2  | [14,18]  |
| chr2:43980230  | LRPPRC | coding_exon |                                                                                                                                                     | - | AtoG | 0.1071 | 0.1154 | 2  | 2  | [26,28]  |
| chr2:44041215  | LRPPRC | coding_exon |                                                                                                                                                     | - | AtoG | 0.1    | 0.3    | 9  | 3  | [10,28]  |
| chr2:43969172  | LRPPRC | UTR3        |                                                                                                                                                     | - | TtoC | 0.125  | 0.1818 | 7  | 2  | [16,22]  |
| chr10:71728983 | LRRC20 | UTR3        |                                                                                                                                                     | - | TtoG | 0.1    | 0.1    | 3  | 2  | [10,10]  |
| chr10:71729562 | LRRC20 | UTR3        |                                                                                                                                                     | - | GtoT | 0.1    | 0.1    | 3  | 2  | [10,10]  |
| chr15:97613726 | LRRC28 | coding_exon | ENST00000301981:LtoR;ENST00000331450:LtoR;ENST00000422500:LtoR;ENST00000422500:LtoR;ENST00000422500:LtoR;                                           | + | TtoG | 0.1    | 0.1    | 2  | 2  | [10,10]  |
| chr15:9719067  | LRRC28 | coding_exon | ENST00000301981:CtoW;ENST00000422500:CtoW;ENST00000447360:CtoW;ENST00000447360:CtoW;ENST00000447360:CtoW;                                           | + | TtoG | 0.125  | 0.2308 | 7  | 3  | [13,16]  |
| chr15:97270977 | LRRC28 | coding_exon | ENST00000301981:AtoS;ENST00000422500:AtoS;ENST00000450058:AtoS;                                                                                     | + | GtoT | 0.1    | 0.1429 | 2  | 2  | [10,14]  |
| chr15:9719073  | LRRC28 | coding_exon |                                                                                                                                                     | + | TtoC | 0.1    | 0.1667 | 3  | 2  | [10,12]  |
| chr1:46524047  | LRRC41 | coding_exon | ENST00000254454:StoP;ENST00000343304:StoP;ENST00000371972:StoP;                                                                                     | - | TtoC | 0.1    | 0.1333 | 2  | 2  | [10,15]  |
| chr1:3686917   | LRRC47 | UTR3        |                                                                                                                                                     | - | AtoG | 0.1154 | 0.1818 | 4  | 2  | [11,26]  |
| chr15:40624714 | LRRCS7 | coding_exon |                                                                                                                                                     | - | CtoA | 0.1    | 0.1    | 2  | 2  | [10,10]  |
| chr17:45815211 | LRRCS9 | UTR3        |                                                                                                                                                     | - | TtoC | 0.1    | 0.1333 | 2  | 2  | [15,20]  |
| chr7:149659721 | LRRC61 | UTR5        |                                                                                                                                                     | + | AtoG | 0.1111 | 0.15   | 4  | 2  | [18,20]  |
| chr7:149659747 | LRRC61 | UTR5        |                                                                                                                                                     | + | AtoG | 0.1    | 0.2143 | 6  | 3  | [10,14]  |
| chr9:130710186 | LRRC8A | coding_exon | ENST00000259324:YtoN;ENST00000372599:YtoN;ENST00000372600:YtoN;                                                                                     | + | TtoA | 0.1    | 0.1    | 2  | 2  | [10,10]  |
| chr9:130710916 | LRRC8A | coding_exon | ENST00000259324:LtoH;ENST00000372599:LtoH;ENST00000372600:LtoH;                                                                                     | + | TtoA | 0.1    | 0.1    | 2  | 2  | [10,10]  |
| chr9:130719991 | LRRC8A | UTR3        |                                                                                                                                                     | + | TtoC | 0.1818 | 0.2    | 3  | 2  | [10,11]  |
| chr1:90171563  | LRRC8D | mixed       |                                                                                                                                                     | + | TtoC | 0.1    | 0.2    | 4  | 2  | [10,10]  |
| chr1:90172282  | LRRC8D | mixed       |                                                                                                                                                     | + | AtoG | 0.1    | 0.2    | 2  | 2  | [10,10]  |
| chr2:23833477  | LRRFP1 | coding_exon | ENST00000244815:AtoV;ENST00000289175:AtoV;ENST00000308482:AtoV;ENST00000308482:AtoV;ENST00000308482:AtoV;                                           | + | CtoT | 0.1081 | 0.1429 | 2  | 2  | [35,37]  |
| chr2:37071635  | LRRFP2 | coding_exon |                                                                                                                                                     | - | AtoG | 0.1667 | 0.2    | 4  | 2  | [18,20]  |
| chr3:37070265  | LRRFP2 | UTR3        |                                                                                                                                                     | - | TtoG | 0.1    | 0.1    | 6  | 3  | [10,10]  |
| chr15:99423272 | LRRK1  | coding_exon | ENST00000284395:StoA;ENST00000388948:StoA;                                                                                                          | + | TtoG | 0.1    | 0.1053 | 4  | 2  | [10,19]  |
| chr15:99406355 | LRRK1  | coding_exon | ENST00000284395:LtoR;ENST00000388948:LtoR;                                                                                                          | + | TtoG | 0.1429 | 0.2    | 2  | 2  | [15,20]  |
| chr15:99427163 | LRRK1  | UTR3        |                                                                                                                                                     | + | GtoT | 0.375  | 0.5652 | 2  | 2  | [23,56]  |
| chr9:129275915 | LRSAM1 | coding_exon | ENST00000300417:YtoN;ENST00000323301:YtoN;ENST00000373322:YtoN;ENST00000373322:YtoN;ENST00000373322:YtoN;                                           | + | TtoA | 0.1    | 0.1    | 2  | 2  | [10,10]  |
| chr9:129257126 | LRSAM1 | coding_exon | ENST00000300417:LtoP;ENST00000323301:LtoP;ENST00000373322:LtoP;ENST00000373322:LtoP;ENST00000373322:LtoP;                                           | + | TtoC | 0.1    | 0.1667 | 6  | 3  | [10,14]  |
| chr7:101900568 | LRWD1  | UTR3        |                                                                                                                                                     | + | TtoG | 0.1    | 0.1176 | 3  | 2  | [10,17]  |
| chr8:38140179  | LSM1   | UTR3        |                                                                                                                                                     | - | TtoA | 0.1    | 0.1    | 4  | 2  | [10,10]  |
| chr19:39410718 | LSM14A | UTR3        |                                                                                                                                                     | + | GtoA | 0.1    | 0.1    | 3  | 2  | [10,10]  |
| chr19:39411221 | LSM14A | UTR3        |                                                                                                                                                     | + | CtoT | 0.125  | 0.2    | 5  | 2  | [15,16]  |
| chr19:39411976 | LSM14A | UTR3        |                                                                                                                                                     | + | TtoG | 0.1    | 0.2857 | 6  | 4  | [10,14]  |
| chr20:60142724 | LSM14B | mixed       |                                                                                                                                                     | + | AtoG | 0.1304 | 0.1364 | 6  | 2  | [22,23]  |
| chr20:60142852 | LSM14B | UTR3        |                                                                                                                                                     | + | CtoA | 0.1    | 0.1    | 3  | 2  | [10,10]  |
| chr20:60142853 | LSM14B | UTR3        |                                                                                                                                                     | + | AtoG | 0.1667 | 0.1875 | 4  | 2  | [12,16]  |
| chr6:31873169  | LSM2   | UTR3        |                                                                                                                                                     | - | TtoA | 0.1053 | 0.125  | 3  | 2  | [16,19]  |
| chr6:31873171  | LSM2   | UTR3        |                                                                                                                                                     | - | AtoG | 0.1    | 0.1087 | 9  | 4  | [20,46]  |
| chr4:147330401 | LSM6   | UTR3        |                                                                                                                                                     | + | AtoG | 0.1    | 0.1    | 2  | 2  | [10,10]  |
| chr11:1870029  | LSP1   | UTR3        |                                                                                                                                                     | + | AtoC | 0.1071 | 0.1138 | 5  | 2  | [58,125] |
| chr11:1870054  | LSP1   | UTR3        |                                                                                                                                                     | + | TtoC | 0.1077 | 0.1087 | 7  | 2  | [46,65]  |
| chr21:46453962 | LSS    | coding_exon |                                                                                                                                                     | - | CtoG | 0.125  | 0.2222 | 3  | 2  | [17,18]  |
| chr6:31650059  | LTA    | UTR3        |                                                                                                                                                     | + | AtoG | 0.1024 | 0.2927 | 19 | 16 | [20,207] |
| chr6:31650060  | LTA    | UTR3        |                                                                                                                                                     | + | AtoG | 0.1071 | 0.2222 | 15 | 5  | [10,42]  |
| chr6:31650061  | LTA    | UTR3        |                                                                                                                                                     | + | TtoA | 0.1    | 0.3529 | 13 | 10 | [10,54]  |
| chr12:94947080 | LTA4H  | coding_exon |                                                                                                                                                     | - | GtoA | 0.1111 | 0.1111 | 3  | 2  | [18,18]  |
| chr12:94918892 | LTA4H  | UTR3        |                                                                                                                                                     | - | TtoC | 0.1111 | 0.129  | 6  | 2  | [27,32]  |
| chr6:31656353  | LTB    | UTR3        |                                                                                                                                                     | - | AtoC | 0.1    | 0.1053 | 2  | 2  | [10,19]  |
| chr6:144225056 | LTV1   | coding_exon | ENST00000367576:DtoG;                                                                                                                               | + | AtoG | 0.1429 | 0.2222 | 10 | 3  | [10,17]  |
| chr16:210649   | LUC7L  | coding_exon | ENST00000293872:DtoE;ENST00000337351:DtoE;ENST00000397780:DtoE;ENST00000397780:DtoE;ENST00000397780:DtoE;                                           | - | TtoG | 0.1053 | 0.1111 | 3  | 2  | [19,19]  |
| chr16:217335   | LUC7L  | mixed       |                                                                                                                                                     | - | AtoT | 0.1111 | 0.3    | 11 | 7  | [10,27]  |
| chr7:138758324 | LUC7L2 | UTR3        |                                                                                                                                                     | + | TtoG | 0.125  | 0.1667 | 3  | 2  | [12,16]  |
| chr7:138758395 | LUC7L2 | UTR3        |                                                                                                                                                     | + | TtoA | 0.1    | 0.1818 | 6  | 3  | [10,12]  |

|                |           |             |                                                                                      |   |      |        |        |    |   |         |
|----------------|-----------|-------------|--------------------------------------------------------------------------------------|---|------|--------|--------|----|---|---------|
| chr1:23292498  | LUZP1     | coding_exon | ENST00000314174:NtoD;ENST00000374623:NtoD;ENST00000418342:NtoD;                      | - | AtoG | 0.1    | 0.2    | 2  | 2 | [10,15] |
| chr6:31746732  | LY6G5B    | mixed       |                                                                                      | + | TtoA | 0.1333 | 0.2    | 4  | 2 | [10,15] |
| chr6:31748710  | LY6G5B    | UTR3        |                                                                                      | + | AtoG | 0.1    | 0.1333 | 5  | 2 | [10,15] |
| chr2:160458692 | LY75      | coding_exon | ENST00000263636:WtoG;ENST00000409803:WtoG;ENST00000409827:WtoG;                      | - | TtoG | 0.1    | 0.1    | 3  | 2 | [10,10] |
| chr6:6600206   | LY86      | UTR3        |                                                                                      | + | TtoC | 0.1429 | 0.1875 | 7  | 4 | [13,18] |
| chr1:159036278 | LY9       | mixed       |                                                                                      | + | TtoG | 0.1    | 0.125  | 2  | 2 | [10,16] |
| chr1:159036288 | LY9       | mixed       |                                                                                      | + | TtoC | 0.1765 | 0.2143 | 5  | 2 | [14,17] |
| chr4:4320533   | LYAR      | coding_exon | ENST00000343470:VtoA;ENST00000452476:VtoA;                                           | - | TtoC | 0.1    | 0.1364 | 3  | 3 | [10,22] |
| chr4:4320559   | LYAR      | coding_exon |                                                                                      | - | TtoC | 0.1    | 0.1111 | 5  | 2 | [10,28] |
| chr1:23994613  | LYPLA2    | UTR3        |                                                                                      | + | TtoC | 0.1176 | 0.1818 | 2  | 2 | [11,18] |
| chr1:23994615  | LYPLA2    | UTR3        |                                                                                      | + | AtoG | 0.1667 | 0.4118 | 2  | 2 | [12,18] |
| chr1:217450564 | LYPLAL1   | coding_exon |                                                                                      | + | AtoG | 0.1    | 0.1667 | 6  | 2 | [10,12] |
| chr16:20843304 | LYRM1     | UTR3        |                                                                                      | + | TtoA | 0.1    | 0.1429 | 5  | 3 | [10,18] |
| chr16:20843735 | LYRM1     | UTR3        |                                                                                      | + | TtoC | 0.1176 | 0.1538 | 5  | 2 | [13,18] |
| chr5:130566784 | LYRM7     | UTR3        |                                                                                      | + | TtoC | 0.1    | 0.1    | 2  | 2 | [10,10] |
| chr1:149401031 | LYSMD1    | coding_exon | ENST00000368908:WtoS;ENST00000440902:WtoS;                                           | - | GtoC | 0.1111 | 0.1333 | 2  | 2 | [15,18] |
| chr15:98073610 | LYSMD4    | mixed       |                                                                                      | - | TtoC | 0.1    | 0.1    | 7  | 2 | [10,21] |
| chr1:9913074   | LZIC      | coding_exon |                                                                                      | - | AtoG | 0.1    | 0.1    | 3  | 2 | [10,10] |
| chr22:19672309 | LZTR1     | coding_exon |                                                                                      | + | TtoC | 0.1    | 0.1    | 2  | 2 | [10,10] |
| chr19:4789352  | M6PRBP1   | UTR3        |                                                                                      | - | TtoA | 0.2    | 0.4    | 3  | 3 | [10,16] |
| chr19:4789359  | M6PRBP1   | UTR3        |                                                                                      | - | AtoG | 0.1    | 0.1667 | 9  | 3 | [12,20] |
| chr1:39591327  | MACF1     | mixed       |                                                                                      | + | TtoC | 0.1    | 0.1429 | 4  | 2 | [10,14] |
| chr1:39669016  | MACF1     | mixed       |                                                                                      | + | TtoC | 0.1    | 0.1538 | 5  | 2 | [10,13] |
| chr1:39677585  | MACF1     | mixed       |                                                                                      | + | TtoC | 0.1163 | 0.1429 | 4  | 2 | [14,43] |
| chr1:39681709  | MACF1     | mixed       |                                                                                      | + | AtoG | 0.1111 | 0.125  | 5  | 2 | [18,24] |
| chr1:39686147  | MACF1     | mixed       |                                                                                      | + | GtoA | 0.1    | 0.1    | 2  | 2 | [10,30] |
| chr1:39724179  | MACF1     | UTR3        |                                                                                      | + | TtoC | 0.1    | 0.2    | 4  | 4 | [10,14] |
| chr1:39724310  | MACF1     | UTR3        |                                                                                      | + | TtoC | 0.1    | 0.1176 | 3  | 2 | [10,17] |
| chr4:121206413 | MAD2L1    | coding_exon | ENST00000296509:itoV;ENST00000333047:itoV;                                           | - | AtoG | 0.1053 | 0.2    | 2  | 2 | [10,21] |
| chr4:121202598 | MAD2L1    | coding_exon |                                                                                      | - | CtoT | 0.129  | 0.1429 | 2  | 2 | [21,31] |
| chr4:121200566 | MAD2L1    | UTR3        |                                                                                      | - | AtoG | 0.1    | 0.1    | 3  | 2 | [10,10] |
| chr11:47286772 | MADD      | coding_exon | ENST00000311027:itoV;ENST00000342922:itoV;ENST00000349238:itoV;ENST00000349238:itoV; | + | AtoG | 0.1    | 0.1    | 5  | 2 | [10,10] |
| chr4:1323279   | MAEA      | UTR3        |                                                                                      | + | TtoC | 0.1176 | 0.1538 | 2  | 2 | [13,17] |
| chr4:1323875   | MAEA      | UTR3        |                                                                                      | + | TtoA | 0.1    | 0.2308 | 5  | 3 | [10,14] |
| chr8:145234484 | MAF1      | UTR3        |                                                                                      | + | TtoA | 0.1    | 0.1111 | 3  | 2 | [10,10] |
| chr3:185910879 | MAGEF1    | mixed       |                                                                                      | - | TtoC | 0.1    | 0.1765 | 8  | 2 | [10,17] |
| chr1:53465273  | MAGOH     | UTR3        |                                                                                      | - | TtoG | 0.1    | 0.1429 | 3  | 2 | [14,20] |
| chr12:10654520 | MAGOHB    | coding_exon | ENST00000320756:NtoD;ENST00000381881:NtoD;                                           | - | AtoG | 0.1    | 0.1667 | 3  | 2 | [18,30] |
| chr9:87823517  | MAK10     | coding_exon |                                                                                      | + | AtoG | 0.1053 | 0.1429 | 6  | 2 | [14,19] |
| chr1:117786376 | MAN1A2    | mixed       |                                                                                      | + | AtoG | 0.1    | 0.1818 | 7  | 3 | [10,17] |
| chr1:117786377 | MAN1A2    | mixed       |                                                                                      | + | TtoG | 0.1    | 0.2    | 7  | 3 | [10,15] |
| chr1:117872591 | MAN1A2    | UTR3        |                                                                                      | + | CtoG | 0.1    | 0.2    | 3  | 2 | [10,10] |
| chr9:139116584 | MAN1B1    | coding_exon |                                                                                      | + | GtoA | 0.2308 | 0.3333 | 4  | 4 | [10,13] |
| chr15:89257111 | MAN2A2    | coding_exon | ENST00000360468:PtoA;ENST00000431652:NtoK;                                           | + | CtoG | 0.1    | 0.2381 | 11 | 4 | [13,30] |
| chr4:6662463   | MAN2B2    | coding_exon | ENST00000285599:StoP;                                                                | + | TtoC | 0.2    | 0.2143 | 4  | 2 | [10,14] |
| chr15:73438726 | MAN2C1    | coding_exon | ENST00000267978:QtoP;                                                                | - | AtoC | 0.1    | 0.4375 | 13 | 5 | [10,41] |
| chr15:73438724 | MAN2C1    | coding_exon | ENST00000267978:EtoK;                                                                | - | GtoA | 0.1    | 0.4118 | 14 | 9 | [10,40] |
| chr15:73435192 | MAN2C1    | UTR3        |                                                                                      | - | TtoC | 0.1364 | 0.1538 | 8  | 2 | [13,22] |
| chr4:103804992 | MANBA     | coding_exon |                                                                                      | - | GtoA | 0.125  | 0.1429 | 3  | 2 | [14,16] |
| chr5:71530066  | MAP1B     | coding_exon | ENST00000296755:StoA;                                                                | + | TtoG | 0.1    | 0.2    | 2  | 2 | [10,10] |
| chr5:71530076  | MAP1B     | coding_exon | ENST00000296755:QtoR;                                                                | + | AtoG | 0.1818 | 0.2727 | 2  | 2 | [11,11] |
| chr19:4052140  | MAP2K2    | coding_exon | ENST00000262948:DtoE;ENST00000394867:DtoE;ENST00000443189:DtoE;                      | - | TtoG | 0.1    | 0.2    | 5  | 2 | [10,16] |
| chr19:4052246  | MAP2K2    | mixed       |                                                                                      | - | GtoC | 0.1429 | 0.1875 | 7  | 3 | [14,29] |
| chr19:4052247  | MAP2K2    | mixed       |                                                                                      | - | AtoT | 0.125  | 0.1667 | 7  | 4 | [13,32] |
| chr19:4053378  | MAP2K2    | mixed       |                                                                                      | - | TtoC | 0.1    | 0.1875 | 6  | 2 | [10,16] |
| chr19:4053405  | MAP2K2    | mixed       |                                                                                      | - | CtoT | 0.1053 | 0.12   | 5  | 2 | [19,25] |
| chr19:4053415  | MAP2K2    | mixed       |                                                                                      | - | AtoG | 0.1    | 0.125  | 7  | 2 | [10,24] |
| chr19:4068477  | MAP2K2    | mixed       |                                                                                      | - | CtoG | 0.1    | 0.1667 | 4  | 2 | [22,42] |
| chr17:21158633 | MAP2K3    | UTR3        |                                                                                      | + | TtoC | 0.9855 | 1      | 7  | 7 | [33,95] |
| chr15:65665294 | MAP2K5    | coding_exon | ENST00000178640:PtoH;ENST00000395476:PtoH;                                           | + | CtoA | 0.1    | 0.1    | 2  | 2 | [10,10] |
| chr15:65849002 | MAP2K5    | coding_exon |                                                                                      | + | CtoG | 0.1    | 0.1    | 2  | 2 | [10,10] |
| chr17:65024636 | MAP2K6    | coding_exon | ENST00000359094:NtoK;                                                                | + | TtoG | 0.1    | 0.1    | 3  | 2 | [10,10] |
| chr17:65031300 | MAP2K6    | coding_exon | ENST00000359094:CtoR;                                                                | + | TtoC | 0.1    | 0.125  | 2  | 2 | [10,16] |
| chr19:7883830  | MAP2K7    | UTR3        |                                                                                      | + | CtoA | 0.1    | 0.1538 | 2  | 2 | [10,13] |
| chr12:52162236 | MAP3K12   | coding_exon | ENST00000267079:QtoR;ENST00000444144:QtoR;                                           | - | AtoG | 0.1    | 0.1    | 3  | 2 | [10,10] |
| chr12:5216490  | MAP3K12   | coding_exon | ENST00000267079:KtoR;ENST00000444144:KtoR;                                           | - | AtoG | 0.1    | 0.2    | 3  | 2 | [10,10] |
| chr3:186486014 | MAP3K13   | UTR5        |                                                                                      | + | AtoC | 0.1    | 0.1    | 2  | 2 | [10,10] |
| chr17:40707646 | MAP3K14   | coding_exon | ENST00000344686:PtoR;                                                                | - | CtoG | 0.1    | 0.1579 | 3  | 2 | [10,19] |
| chr17:40700857 | MAP3K14   | coding_exon |                                                                                      | - | AtoC | 0.1818 | 0.2    | 3  | 2 | [10,11] |
| chr17:40696815 | MAP3K14   | UTR3        |                                                                                      | - | AtoC | 0.1    | 0.1176 | 2  | 2 | [10,17] |
| chr2:127780650 | MAP3K2    | UTR3        |                                                                                      | - | TtoG | 0.1    | 0.1    | 2  | 2 | [10,10] |
| chr6:161390909 | MAP3K4    | coding_exon | ENST00000348824:LtoI;ENST00000366919:LtoI;ENST00000366920:LtoI;ENST00000366920:LtoI; | + | TtoA | 0.1    | 0.1111 | 2  | 2 | [10,10] |
| chr6:161422032 | MAP3K4    | coding_exon | ENST00000348824:Gto*;ENST00000366919:Gto*;ENST00000366920:Gto*;ENST00000366920:Gto*; | + | GtoT | 0.1    | 0.1    | 2  | 2 | [10,10] |
| chr6:136964708 | MAP3K5    | coding_exon | ENST00000355845:CtoR;ENST00000359015:CtoR;                                           | - | TtoC | 0.1    | 0.1538 | 3  | 2 | [10,13] |
| chr6:136985738 | MAP3K5    | coding_exon |                                                                                      | - | TtoC | 0.1    | 0.1429 | 7  | 2 | [10,14] |
| chr22:38214122 | MAP3K7IP1 | mixed       |                                                                                      | + | AtoC | 0.1    | 0.1    | 2  | 2 | [10,10] |
| chr22:38241623 | MAP3K7IP1 | mixed       |                                                                                      | + | TtoC | 0.1    | 0.1    | 7  | 2 | [10,40] |
| chr22:38241871 | MAP3K7IP1 | mixed       |                                                                                      | + | TtoC | 0.1    | 0.1    | 2  | 2 | [10,10] |
| chr22:38242094 | MAP3K7IP1 | mixed       |                                                                                      | + | TtoC | 0.1    | 0.1429 | 3  | 2 | [10,14] |
| chr6:149741482 | MAP3K7IP2 | coding_exon |                                                                                      | + | AtoG | 0.1    | 0.1    | 2  | 2 | [10,10] |
| chr6:149772609 | MAP3K7IP2 | UTR3        |                                                                                      | + | TtoC | 0.1    | 0.1667 | 5  | 2 | [10,12] |
| chr6:149773419 | MAP3K7IP2 | UTR3        |                                                                                      | + | AtoT | 0.1    | 0.1111 | 4  | 2 | [10,18] |
| chr10:30787136 | MAP3K8    | coding_exon | ENST00000263056:YtoN;ENST00000375321:YtoN;ENST00000375328:YtoN;                      | + | TtoA | 0.1    | 0.1053 | 2  | 2 | [10,19] |
| chr10:30776876 | MAP3K8    | coding_exon | ENST00000263056:CtoS;ENST00000375321:CtoS;ENST00000375328:CtoS;                      | + | TtoA | 0.1    | 0.1    | 4  | 2 | [10,10] |
| chr3:47933123  | MAP4      | coding_exon | ENST00000360240:KtoE;ENST00000395734:KtoE;ENST00000403918:KtoE;                      | - | AtoG | 0.1    | 0.1538 | 3  | 2 | [10,13] |
| chr3:47933226  | MAP4      | coding_exon |                                                                                      | - | CtoT | 0.1    | 0.1333 | 4  | 2 | [15,30] |
| chr3:47867249  | MAP4      | UTR3        |                                                                                      | - | TtoC | 0.1154 | 0.1875 | 4  | 3 | [16,26] |
| chr3:47868721  | MAP4      | UTR3        |                                                                                      | - | AtoG | 0.1053 | 0.1111 | 2  | 2 | [18,19] |
| chr19:43770125 | MAP4K1    | UTR3        |                                                                                      | - | TtoC | 0.1    | 0.1429 | 7  | 3 | [14,52] |
| chr14:49956572 | MAP4K5    | coding_exon | ENST00000013125:VtoD;ENST00000429500:VtoD;                                           | - | TtoA | 0.1    | 0.1667 | 2  | 2 | [10,12] |
| chr1:36410676  | MAP7D1    | coding_exon | ENST00000316156:EtoG;ENST00000373150:EtoG;ENST00000373151:EtoG;                      | + | AtoG | 0.1111 | 0.1818 | 3  | 2 | [11,28] |
| chr22:20446301 | MAPK1     | UTR3        |                                                                                      | - | TtoA | 0.1667 | 0.2    | 4  | 3 | [10,13] |
| chr22:20446750 | MAPK1     | UTR3        |                                                                                      | - | AtoG | 0.1    | 0.1111 | 2  | 2 | [10,18] |
| chr22:49045097 | MAPK11    | UTR3        |                                                                                      | - | AtoG | 1      | 1      | 5  | 5 | [10,24] |
| chr22:49033475 | MAPK12    | UTR3        |                                                                                      | - | AtoC | 0.1    | 0.1    | 2  | 2 | [10,10] |
| chr6:36186470  | MAPK14    | UTR3        |                                                                                      | + | TtoC | 0.1034 | 0.1818 | 4  | 2 | [11,29] |

|                 |           |             |                                                                                      |   |      |        |        |    |    |          |
|-----------------|-----------|-------------|--------------------------------------------------------------------------------------|---|------|--------|--------|----|----|----------|
| chr14:54602467  | MAPK1IP1L | UTR3        |                                                                                      | + | TtoA | 0.1    | 0.1    | 2  | 2  | [10,10]  |
| chr14:54602521  | MAPK1IP1L | UTR3        |                                                                                      | + | CtoA | 0.1    | 0.1667 | 3  | 2  | [11,12]  |
| chr14:54602612  | MAPK1IP1L | UTR3        |                                                                                      | + | TtoC | 0.1    | 0.1818 | 3  | 2  | [10,11]  |
| chr14:54605342  | MAPK1IP1L | UTR3        |                                                                                      | + | GtoT | 0.1    | 0.1    | 4  | 2  | [10,10]  |
| chr14:54605345  | MAPK1IP1L | UTR3        |                                                                                      | + | TtoA | 0.1    | 0.125  | 14 | 3  | [10,16]  |
| chr10:49313993  | MAPK8     | UTR3        |                                                                                      | + | TtoG | 0.1    | 0.1    | 2  | 2  | [10,10]  |
| chr11:45881281  | MAPK8IP1  | coding_exon | ENST00000241014:VtoI;ENST00000395629:VtoI;                                           | + | GtoA | 1      | 1      | 3  | 3  | [13,19]  |
| chr11:45883304  | MAPK8IP1  | coding_exon | ENST00000241014:PtoL;ENST00000395629:PtoL;                                           | + | CtoT | 1      | 1      | 2  | 2  | [18,40]  |
| chr11:45882142  | MAPK8IP1  | coding_exon | ENST00000241014:LtoP;ENST00000395629:LtoP;                                           | + | TtoC | 0.7    | 1      | 4  | 4  | [10,61]  |
| chr11:45880140  | MAPK8IP1  | coding_exon | ENST00000241014:HtoV;ENST00000395629:HtoV;                                           | + | CtoT | 1      | 1      | 2  | 2  | [21,22]  |
| chr11:45880523  | MAPK8IP1  | coding_exon | ENST00000241014:HtoP;ENST00000395629:HtoP;                                           | + | AtoC | 0.9231 | 1      | 4  | 4  | [13,37]  |
| chr11:45880558  | MAPK8IP1  | coding_exon | ENST00000241014:GtoS;ENST00000395629:GtoS;                                           | + | GtoA | 1      | 1      | 2  | 2  | [11,11]  |
| chr11:45881530  | MAPK8IP1  | coding_exon | ENST00000241014:GtoR;ENST00000395629:GtoR;                                           | + | GtoC | 0.8571 | 1      | 2  | 2  | [14,20]  |
| chr11:45881557  | MAPK8IP1  | coding_exon | ENST00000241014:AtoT;ENST00000395629:AtoT;                                           | + | GtoA | 0.9524 | 1      | 3  | 3  | [21,36]  |
| chr11:45880527  | MAPK8IP1  | coding_exon |                                                                                      | + | CtoT | 0.9    | 1      | 4  | 4  | [12,20]  |
| chr11:45881061  | MAPK8IP1  | coding_exon |                                                                                      | + | AtoG | 1      | 1      | 2  | 2  | [11,12]  |
| chr11:45881496  | MAPK8IP1  | coding_exon |                                                                                      | + | TtoC | 0.9333 | 1      | 3  | 3  | [13,30]  |
| chr11:45882260  | MAPK8IP1  | coding_exon |                                                                                      | + | GtoA | 1      | 1      | 2  | 2  | [12,16]  |
| chr11:45882589  | MAPK8IP1  | coding_exon |                                                                                      | + | CtoT | 0.9706 | 1      | 2  | 2  | [28,35]  |
| chr11:45883850  | MAPK8IP1  | UTR3        |                                                                                      | + | TtoC | 0.9    | 1      | 3  | 3  | [10,30]  |
| chr11:45883852  | MAPK8IP1  | UTR3        |                                                                                      | + | TtoC | 0.9    | 1      | 3  | 3  | [10,25]  |
| chr11:45884222  | MAPK8IP1  | UTR3        |                                                                                      | + | GtoA | 0.9    | 1      | 3  | 3  | [10,13]  |
| chr16:1737031   | MAPK8IP3  | coding_exon | ENST00000250894:CtoG;ENST00000356010:CtoG;                                           | + | TtoG | 0.1818 | 0.2727 | 3  | 3  | [10,11]  |
| chr16:1760315   | MAPK8IP3  | UTR3        |                                                                                      | + | TtoC | 0.1429 | 0.2308 | 2  | 2  | [13,21]  |
| chr5:179640085  | MAPK9     | coding_exon | ENST00000343111:QtoR;ENST00000347470:QtoR;ENST00000393360:QtoR;ENST00000393360:QtoR; | - | AtoG | 0.1    | 0.2222 | 3  | 2  | [10,18]  |
| chr5:179595731  | MAPK9     | UTR3        |                                                                                      | - | TtoC | 0.1111 | 0.2    | 9  | 2  | [10,10]  |
| chr5:179595748  | MAPK9     | UTR3        |                                                                                      | - | TtoC | 0.1    | 0.1    | 3  | 2  | [10,10]  |
| chr1:204974220  | MAPKAPK2  | UTR3        |                                                                                      | + | AtoG | 0.1818 | 0.1818 | 3  | 2  | [11,11]  |
| chr3:50654736   | MAPKAPK3  | coding_exon | ENST00000357955:HtoP;ENST00000446044:HtoP;                                           | + | AtoC | 0.1    | 0.2727 | 3  | 2  | [11,20]  |
| chr3:50660403   | MAPKAPK3  | coding_exon |                                                                                      | + | TtoA | 0.1    | 0.1    | 3  | 2  | [10,10]  |
| chr15:39905561  | MAPKBP1   | UTR3        |                                                                                      | + | AtoG | 0.1    | 0.1    | 2  | 2  | [10,10]  |
| chr15:39978456  | MAPKBP1   | UTR3        |                                                                                      | + | AtoT | 0.1053 | 0.1818 | 5  | 2  | [11,19]  |
| chr15:39978996  | MAPKBP1   | UTR3        |                                                                                      | + | GtoA | 0.1    | 0.1818 | 3  | 2  | [10,11]  |
| chr15:39979009  | MAPKBP1   | UTR3        |                                                                                      | + | CtoA | 0.1667 | 0.4    | 5  | 2  | [10,12]  |
| chr4:101021807  | MAPKSP1   | UTR3        |                                                                                      | - | AtoG | 0.125  | 0.1579 | 4  | 2  | [16,20]  |
| chr18:30904171  | MAPRE2    | coding_exon | ENST00000300249:VtoG;ENST00000413393:VtoG;ENST00000436190:VtoG;                      | + | TtoG | 0.1111 | 0.1667 | 4  | 2  | [12,18]  |
| chr19:8409531   | MARCH2    | UTR3        |                                                                                      | + | TtoC | 0.1    | 0.1111 | 2  | 2  | [18,20]  |
| chr5:126281743  | MARCH3    | coding_exon | ENST00000308660:StoI;                                                                | - | GtoT | 0.1    | 0.1    | 2  | 2  | [10,10]  |
| chr5:10430983   | MARCH6    | coding_exon | ENST00000274140:StoR;                                                                | + | TtoA | 0.1429 | 0.1538 | 3  | 2  | [13,14]  |
| chr5:10483116   | MARCH6    | coding_exon | ENST00000274140:LtoH;                                                                | + | TtoA | 0.1    | 0.1111 | 9  | 2  | [10,31]  |
| chr5:10458684   | MARCH6    | coding_exon |                                                                                      | + | TtoC | 0.1    | 0.1579 | 4  | 2  | [10,20]  |
| chr2:160312953  | MARCH7    | coding_exon | ENST00000259050:DtoE;ENST00000409175:DtoE;ENST00000409591:DtoE;                      | + | TtoA | 0.1429 | 0.3    | 3  | 2  | [10,28]  |
| chr2:160332097  | MARCH7    | coding_exon | ENST00000259050:*toK;ENST00000409175:*toK;ENST00000409591:*toK;                      | + | TtoA | 0.1    | 0.1429 | 3  | 2  | [10,21]  |
| chr2:160332113  | MARCH7    | UTR3        |                                                                                      | + | AtoG | 0.1    | 0.1    | 2  | 2  | [10,10]  |
| chr10:45276756  | MARCH8    | coding_exon | ENST00000319836:StoP;ENST00000395769:StoP;ENST00000395771:StoP;                      | - | TtoC | 0.1    | 0.1667 | 2  | 2  | [10,12]  |
| chr10:45304823  | MARCH8    | coding_exon | ENST00000319836:KtoQ;ENST00000395769:KtoQ;ENST00000395771:KtoQ;                      | - | AtoC | 0.1    | 0.1    | 4  | 2  | [10,10]  |
| chr10:45271339  | MARCH8    | mixed       |                                                                                      | - | CtoT | 0.4545 | 0.75   | 2  | 2  | [11,12]  |
| chr6:114288609  | MARCKS    | UTR3        |                                                                                      | + | TtoG | 0.102  | 0.2667 | 5  | 3  | [15,49]  |
| chr1:32572034   | MARCKSL1  | UTR3        |                                                                                      | - | TtoC | 0.1538 | 0.3333 | 12 | 11 | [10,106] |
| chr14:103039347 | MARK3     | UTR3        |                                                                                      | + | AtoG | 0.1333 | 0.1538 | 4  | 2  | [15,26]  |
| chr19:50475799  | MARK4     | coding_exon | ENST00000262891:TtoP;ENST00000300843:TtoP;                                           | + | AtoC | 0.1    | 0.1    | 2  | 2  | [10,10]  |
| chr19:50482758  | MARK4     | coding_exon | ENST00000262891:TtoN;ENST00000300843:TtoN;                                           | + | CtoA | 0.1    | 0.1    | 2  | 2  | [10,10]  |
| chr19:50498439  | MARK4     | UTR3        |                                                                                      | + | AtoG | 0.1    | 0.1    | 3  | 2  | [10,10]  |
| chr19:50498508  | MARK4     | UTR3        |                                                                                      | + | AtoG | 0.1    | 0.1    | 2  | 2  | [10,10]  |
| chr12:56168135  | MARS      | UTR5        |                                                                                      | + | GtoT | 0.1    | 0.375  | 6  | 4  | [10,16]  |
| chr1:46273844   | MAST2     | coding_exon | ENST00000361297:PtoH;ENST00000372009:PtoH;ENST00000456625:PtoH;                      | + | CtoA | 0.1    | 0.1818 | 2  | 2  | [10,11]  |
| chr1:46270459   | MAST2     | coding_exon | ENST00000361297:LtoF;ENST00000372009:LtoF;                                           | + | GtoT | 0.1    | 0.125  | 4  | 2  | [10,16]  |
| chr1:46269500   | MAST2     | coding_exon |                                                                                      | + | GtoC | 0.1    | 0.2    | 2  | 2  | [10,10]  |
| chr1:46270872   | MAST2     | coding_exon |                                                                                      | + | TtoC | 0.1    | 0.1667 | 5  | 2  | [10,18]  |
| chr1:46067775   | MAST2     | mixed       |                                                                                      | + | TtoC | 0.1    | 0.2    | 2  | 2  | [10,10]  |
| chr1:46067824   | MAST2     | mixed       |                                                                                      | + | CtoA | 0.1    | 0.1    | 2  | 2  | [10,10]  |
| chr19:18102477  | MAST3     | coding_exon | ENST00000262811:RtoQ;                                                                | + | GtoA | 0.1    | 0.2    | 2  | 2  | [10,10]  |
| chr19:18118825  | MAST3     | coding_exon | ENST00000262811:DtoE;                                                                | + | TtoG | 0.125  | 0.25   | 5  | 3  | [12,16]  |
| chr19:18121762  | MAST3     | UTR3        |                                                                                      | + | AtoG | 0.1    | 0.1    | 2  | 2  | [10,10]  |
| chr10:27499838  | MASTL     | coding_exon |                                                                                      | + | TtoG | 0.1    | 0.1    | 3  | 2  | [10,10]  |
| chr10:27499985  | MASTL     | coding_exon |                                                                                      | + | TtoA | 0.1    | 0.1    | 4  | 2  | [10,10]  |
| chr5:162878726  | MAT2B     | UTR3        |                                                                                      | + | TtoC | 0.1    | 0.2    | 8  | 4  | [10,20]  |
| chr5:138639721  | MATR3     | UTR5        |                                                                                      | + | TtoG | 0.1667 | 0.2308 | 3  | 2  | [12,13]  |
| chr20:3795190   | MAVS      | mixed       |                                                                                      | + | TtoC | 0.1    | 0.1111 | 2  | 2  | [10,18]  |
| chr14:64611705  | MAX       | mixed       |                                                                                      | - | AtoC | 0.1    | 0.16   | 5  | 2  | [10,25]  |
| chr18:46051840  | MBD1      | mixed       |                                                                                      | - | CtoG | 0.1111 | 0.2353 | 14 | 7  | [17,48]  |
| chr18:46051843  | MBD1      | mixed       |                                                                                      | - | AtoC | 0.125  | 0.1852 | 11 | 6  | [16,40]  |
| chr19:1527680   | MBD3      | UTR3        |                                                                                      | - | TtoA | 0.1818 | 0.1818 | 4  | 2  | [11,12]  |
| chr3:130634659  | MBD4      | coding_exon |                                                                                      | - | TtoC | 0.125  | 0.15   | 2  | 2  | [16,20]  |
| chr2:148944034  | MBD5      | coding_exon |                                                                                      | + | AtoG | 0.1    | 0.1818 | 2  | 2  | [10,11]  |
| chr12:56206277  | MBD6      | coding_exon | ENST00000355673:TtoI;                                                                | + | CtoT | 0.1    | 0.1    | 2  | 2  | [10,10]  |
| chr12:56206279  | MBD6      | coding_exon | ENST00000355673:PtoS;                                                                | + | CtoT | 0.1    | 0.1538 | 2  | 2  | [10,14]  |
| chr12:56210097  | MBD6      | UTR3        |                                                                                      | + | TtoG | 0.1    | 0.1538 | 5  | 3  | [10,13]  |
| chr14:35838050  | MBIP      | mixed       |                                                                                      | - | AtoC | 0.1    | 0.1    | 2  | 2  | [10,10]  |
| chr3:153664540  | MBNL1     | UTR3        |                                                                                      | + | TtoC | 0.1    | 0.1333 | 2  | 2  | [10,15]  |
| chr3:153666160  | MBNL1     | UTR3        |                                                                                      | + | AtoG | 0.1667 | 0.2    | 4  | 2  | [12,21]  |
| chr2:8915736    | MBOAT2    | UTR3        |                                                                                      | - | TtoA | 0.1    | 0.2727 | 3  | 2  | [10,11]  |
| chr3:184237721  | MCCC1     | coding_exon | ENST00000265594:TtoA;ENST00000392616:TtoA;ENST00000492597:TtoA;                      | - | AtoG | 0.1111 | 0.125  | 3  | 2  | [16,18]  |
| chr2:46988482   | MCFD2     | coding_exon | ENST00000319466:StoP;ENST00000409105:StoP;ENST00000409147:StoP;ENST00000409147:StoP; | - | TtoC | 0.1333 | 0.1818 | 2  | 2  | [11,15]  |
| chr1:148813687  | MCL1      | UTR3        |                                                                                      | - | TtoC | 0.12   | 0.1818 | 3  | 2  | [11,25]  |
| chr10:13253251  | MCM10     | coding_exon | ENST00000361282:TtoA;ENST00000378694:TtoA;ENST00000378714:TtoA;ENST00000378714:TtoA; | + | AtoG | 0.1    | 0.1    | 2  | 2  | [10,10]  |
| chr10:13277053  | MCM10     | coding_exon |                                                                                      | + | GtoA | 0.1    | 0.1538 | 2  | 2  | [10,13]  |
| chr3:128823916  | MCM2      | UTR3        |                                                                                      | + | AtoG | 0.16   | 0.1667 | 6  | 2  | [12,25]  |
| chr21:46491087  | MCM3AP    | coding_exon | ENST00000291688:StoA;ENST00000397708:StoA;                                           | - | TtoG | 0.1111 | 0.1579 | 5  | 2  | [19,19]  |
| chr21:46524474  | MCM3AP    | coding_exon | ENST00000291688:NtoD;ENST00000397708:NtoD;                                           | - | AtoG | 0.1    | 0.1053 | 4  | 2  | [10,19]  |
| chr21:46487254  | MCM3AP    | coding_exon |                                                                                      | - | TtoC | 0.125  | 0.2    | 11 | 4  | [13,16]  |
| chr21:46528612  | MCM3AP    | coding_exon |                                                                                      | - | TtoC | 0.1    | 0.1    | 4  | 2  | [10,10]  |
| chr21:46529734  | MCM3AP    | UTR5        |                                                                                      | - | TtoG | 0.1    | 0.125  | 5  | 3  | [16,20]  |
| chr21:46529736  | MCM3AP    | UTR5        |                                                                                      | - | CtoG | 0.1    | 0.125  | 5  | 2  | [16,20]  |
| chr21:46530127  | MCM3AP    | UTR5        |                                                                                      | - | AtoG | 0.1    | 0.1667 | 2  | 2  | [10,12]  |
| chr2:136333433  | MCM6      | coding_exon | ENST00000264156:StoP;                                                                | - | TtoC | 0.1    | 0.1333 | 2  | 2  | [10,15]  |

|                 |          |             |                                                                          |   |      |        |        |    |    |         |
|-----------------|----------|-------------|--------------------------------------------------------------------------|---|------|--------|--------|----|----|---------|
| chr1:85185403   | MCOLN2   | coding_exon | ENST00000284027:Itov;ENST00000370608:Itov;                               | - | AtoG | 0.1    | 0.1364 | 4  | 2  | [10,22] |
| chr1:85169636   | MCOLN2   | coding_exon |                                                                          | - | TtoA | 0.1    | 0.3529 | 7  | 4  | [10,17] |
| chr1:85163920   | MCOLN2   | UTR3        |                                                                          | - | TtoC | 0.1    | 0.2727 | 10 | 5  | [10,11] |
| chr1:85164717   | MCOLN2   | UTR3        |                                                                          | - | TtoA | 0.1    | 0.1667 | 5  | 2  | [12,20] |
| chr8:6487989    | MCPH1    | UTR3        |                                                                          | + | AtoG | 0.1    | 0.1    | 2  | 2  | [10,10] |
| chr12:48244865  | MCRS1    | coding_exon | ENST00000343810:KtoN;ENST00000357123:KtoN;                               | - | AtoC | 0.1154 | 0.1707 | 5  | 2  | [27,41] |
| chr6:30776105   | MDC1     | UTR3        |                                                                          | - | TtoC | 0.12   | 0.1429 | 9  | 3  | [14,25] |
| chr7:114443342  | MDFIC    | UTR3        |                                                                          | + | AtoG | 0.1    | 0.1    | 2  | 2  | [10,10] |
| chr7:114444961  | MDFIC    | UTR3        |                                                                          | + | TtoA | 0.1    | 0.1429 | 8  | 4  | [10,27] |
| chr7:75534296   | MDH2     | UTR3        |                                                                          | + | TtoA | 0.1    | 0.1    | 2  | 2  | [10,10] |
| chr7:75534592   | MDH2     | UTR3        |                                                                          | + | TtoA | 0.1    | 0.1    | 3  | 2  | [10,10] |
| chr12:66995009  | MDM1     | coding_exon | ENST00000303145:DtoE;ENST00000411698:DtoE;                               | - | TtoA | 0.1    | 0.1538 | 3  | 2  | [10,13] |
| chr12:67504617  | MDM2     | coding_exon | ENST00000258149:LtoI;ENST00000311420:LtoI;ENST00000311440:LtoI;ENST00000 | + | CtoA | 0.1176 | 0.1176 | 2  | 2  | [17,17] |
| chr1:202782576  | MDM4     | coding_exon | ENST00000367182:LtoP;ENST00000454264:LtoP;                               | + | TtoC | 0.1    | 0.1538 | 7  | 2  | [10,13] |
| chr1:202789468  | MDM4     | UTR3        |                                                                          | + | TtoG | 0.1429 | 0.2    | 3  | 2  | [10,14] |
| chr1:202792156  | MDM4     | UTR3        |                                                                          | + | AtoG | 0.1304 | 0.1333 | 4  | 2  | [15,23] |
| chr1:202792462  | MDM4     | UTR3        |                                                                          | + | TtoG | 0.2    | 0.2308 | 2  | 2  | [10,13] |
| chr6:90459561   | MDN1     | coding_exon |                                                                          | - | CtoT | 0.3636 | 0.4167 | 2  | 2  | [11,12] |
| chr14:23754673  | MDP1     | coding_exon | ENST00000288087:VtoA;ENST00000396833:VtoA;                               | - | TtoC | 0.1111 | 0.1364 | 2  | 2  | [18,22] |
| chr6:84112706   | ME1      | coding_exon | ENST00000369705:Itov;                                                    | - | AtoG | 0.1111 | 0.1111 | 3  | 2  | [10,18] |
| chr6:43089504   | MEA1     | coding_exon | ENST00000244711:GtoA;                                                    | - | GtoC | 0.2    | 0.6667 | 11 | 11 | [17,33] |
| chr6:43089503   | MEA1     | coding_exon |                                                                          | - | CtoG | 0.25   | 0.6897 | 12 | 11 | [16,37] |
| chr17:34820393  | MED1     | coding_exon | ENST00000300651:VtoA;ENST00000394287:VtoA;                               | - | TtoC | 0.1    | 0.1053 | 5  | 2  | [10,19] |
| chr17:34820361  | MED1     | coding_exon | ENST00000300651:GtoR;ENST00000394287:GtoR;                               | - | GtoA | 0.1111 | 0.3333 | 4  | 4  | [12,32] |
| chr17:34817761  | MED1     | coding_exon |                                                                          | - | TtoC | 0.1667 | 0.1667 | 3  | 2  | [12,12] |
| chr17:34820362  | MED1     | coding_exon |                                                                          | - | AtoC | 0.1579 | 0.4    | 4  | 4  | [10,27] |
| chr12:114904631 | MED13L   | coding_exon | ENST00000281928:CtoG;                                                    | - | TtoG | 0.1    | 0.1    | 3  | 2  | [10,10] |
| chr22:19239293  | MED15    | coding_exon |                                                                          | + | TtoC | 0.1    | 0.1    | 3  | 2  | [20,20] |
| chr22:19271863  | MED15    | UTR3        |                                                                          | + | TtoA | 0.1    | 0.125  | 3  | 2  | [10,16] |
| chr11:93182547  | MED17    | coding_exon | ENST00000251871:VtoE;ENST00000427225:VtoE;                               | + | TtoA | 0.1    | 0.2    | 7  | 3  | [10,18] |
| chr11:93166673  | MED17    | coding_exon | ENST00000251871:LtoL;ENST00000427225:LtoL;                               | + | AtoC | 0.1    | 0.1818 | 3  | 3  | [10,11] |
| chr1:28534597   | MED18    | UTR3        |                                                                          | + | CtoT | 0.1111 | 0.125  | 2  | 2  | [16,18] |
| chr11:57229225  | MED19    | coding_exon |                                                                          | - | AtoG | 0.1    | 0.1    | 2  | 2  | [10,10] |
| chr9:135199292  | MED22    | mixed       |                                                                          | - | AtoT | 0.1    | 0.1    | 2  | 2  | [10,10] |
| chr9:135195680  | MED22    | UTR3        |                                                                          | - | GtoT | 0.75   | 0.8    | 2  | 2  | [10,12] |
| chr6:131965110  | MED23    | coding_exon | ENST00000368053:EtoG;ENST00000368058:EtoG;ENST00000368060:EtoG;ENST000   | - | AtoG | 0.1    | 0.1    | 2  | 2  | [10,10] |
| chr19:55027225  | MED25    | coding_exon | ENST00000312865:LtoQ;ENST00000312881:LtoQ;ENST00000377077:LtoQ;ENST000   | + | TtoA | 0.1053 | 0.1818 | 3  | 2  | [11,19] |
| chr19:55032020  | MED25    | mixed       |                                                                          | + | AtoG | 0.1    | 0.1364 | 4  | 2  | [10,22] |
| chr9:133725374  | MED27    | UTR3        |                                                                          | - | TtoC | 0.15   | 0.2    | 6  | 3  | [10,20] |
| chr4:17234646   | MED28    | UTR3        |                                                                          | + | TtoC | 0.125  | 0.1538 | 8  | 3  | [13,24] |
| chr19:44580247  | MED29    | UTR3        |                                                                          | + | TtoC | 0.1429 | 0.1667 | 4  | 2  | [12,21] |
| chr19:44581002  | MED29    | UTR3        |                                                                          | + | AtoG | 0.1    | 0.2    | 3  | 2  | [10,10] |
| chr1:43622825   | MED8     | mixed       |                                                                          | - | AtoG | 0.1    | 0.1538 | 5  | 3  | [10,16] |
| chr1:43622981   | MED8     | mixed       |                                                                          | - | TtoA | 0.1111 | 0.1875 | 2  | 2  | [16,18] |
| chr15:98070226  | MEF2A    | coding_exon |                                                                          | + | AtoG | 1      | 1      | 5  | 5  | [10,18] |
| chr15:98070755  | MEF2A    | UTR3        |                                                                          | + | AtoG | 0.1    | 0.125  | 3  | 2  | [10,16] |
| chr15:98071904  | MEF2A    | UTR3        |                                                                          | + | TtoC | 0.1    | 0.1    | 3  | 2  | [10,10] |
| chr19:19117900  | MEF2B    | mixed       |                                                                          | - | TtoG | 0.1    | 0.1667 | 2  | 2  | [10,12] |
| chr19:19163917  | MEF2B    | UTR5        |                                                                          | - | CtoT | 0.1    | 0.1    | 2  | 2  | [10,10] |
| chr5:88054404   | MEF2C    | coding_exon | ENST00000340208:RtoG;ENST00000424173:RtoG;ENST00000437473:RtoG;          | - | AtoG | 0.1111 | 0.25   | 8  | 2  | [16,28] |
| chr5:88092872   | MEF2C    | coding_exon | ENST00000340208:CtoW;ENST00000437473:CtoW;                               | - | TtoG | 0.125  | 0.1613 | 3  | 3  | [32,50] |
| chr5:88054495   | MEF2C    | coding_exon |                                                                          | - | TtoC | 0.1    | 0.1    | 4  | 2  | [10,21] |
| chr5:88050885   | MEF2C    | UTR3        |                                                                          | - | TtoA | 0.1    | 0.2    | 3  | 3  | [10,11] |
| chr5:88051354   | MEF2C    | UTR3        |                                                                          | - | TtoA | 0.1429 | 0.1429 | 3  | 2  | [14,14] |
| chr5:88052163   | MEF2C    | UTR3        |                                                                          | - | TtoG | 0.1    | 0.1111 | 4  | 2  | [10,10] |
| chr5:88214529   | MEF2C    | UTR5        |                                                                          | - | AtoT | 0.1364 | 0.1429 | 5  | 2  | [22,28] |
| chr22:40507552  | MEI1     | mixed       |                                                                          | + | AtoG | 0.1    | 0.1429 | 6  | 3  | [10,48] |
| chr9:36641859   | MELK     | coding_exon |                                                                          | + | AtoG | 0.1176 | 0.2308 | 2  | 2  | [13,17] |
| chr15:79083184  | MESDC1   | mixed       |                                                                          | + | CtoT | 0.1429 | 0.1818 | 4  | 3  | [11,14] |
| chr15:79057695  | MESDC2   | mixed       |                                                                          | - | TtoA | 0.1    | 0.1    | 2  | 2  | [10,10] |
| chr15:79058055  | MESDC2   | mixed       |                                                                          | - | TtoA | 0.1    | 0.1429 | 2  | 2  | [10,14] |
| chr4:100202183  | METAP1   | UTR3        |                                                                          | + | TtoA | 0.1667 | 0.1818 | 8  | 2  | [11,12] |
| chr17:2266890   | METT10D  | UTR3        |                                                                          | - | AtoG | 0.1    | 0.1818 | 5  | 2  | [10,11] |
| chr17:2266895   | METT10D  | UTR3        |                                                                          | - | TtoC | 0.1333 | 0.1818 | 4  | 2  | [11,15] |
| chr17:2267985   | METT10D  | UTR3        |                                                                          | - | TtoC | 0.1    | 0.1111 | 5  | 2  | [18,20] |
| chr17:2269411   | METT10D  | UTR3        |                                                                          | - | TtoG | 0.1    | 0.1    | 7  | 2  | [10,10] |
| chr14:20528493  | METT11D1 | coding_exon | ENST00000339374:VtoA;ENST00000382985:VtoA;                               | + | TtoC | 0.1    | 0.1111 | 2  | 2  | [11,18] |
| chr14:20534976  | METT11D1 | UTR3        |                                                                          | + | AtoG | 0.1    | 0.2727 | 6  | 3  | [10,19] |
| chr12:56448945  | METTL1   | UTR3        |                                                                          | - | TtoG | 0.1    | 0.1    | 3  | 2  | [10,10] |
| chr10:12644012  | METTL10  | coding_exon |                                                                          | - | CtoT | 0.1    | 0.1538 | 4  | 2  | [10,13] |
| chr1:170023592  | METTL3   | coding_exon | ENST00000361735:VtoG;ENST00000362019:VtoG;ENST00000367737:VtoG;ENST000   | + | TtoG | 0.1    | 0.1    | 2  | 2  | [10,10] |
| chr1:170032706  | METTL13  | UTR3        |                                                                          | + | TtoA | 0.1    | 0.1    | 4  | 3  | [10,10] |
| chr14:21039882  | METTL3   | coding_exon | ENST00000298717:StoG;                                                    | - | AtoG | 0.1176 | 0.1538 | 3  | 2  | [13,18] |
| chr3:15442987   | METTL6   | coding_exon |                                                                          | - | GtoA | 0.1    | 0.2    | 3  | 2  | [10,10] |
| chr12:49609965  | METTL7A  | coding_exon | ENST00000332160:GtoE;ENST00000433599:GtoE;                               | + | GtoA | 0.1    | 0.1053 | 2  | 2  | [10,19] |
| chr2:171888715  | METTL8   | UTR3        |                                                                          | - | AtoG | 0.1    | 0.1111 | 2  | 2  | [10,18] |
| chr16:21543781  | METTL9   | coding_exon | ENST00000358154:TtoS;ENST00000396014:TtoS;                               | + | AtoT | 0.1013 | 0.129  | 8  | 4  | [31,79] |
| chr16:21574391  | METTL9   | UTR3        |                                                                          | + | AtoG | 0.1    | 0.1667 | 4  | 2  | [10,18] |
| chr18:46955918  | MEX3C    | UTR3        |                                                                          | - | TtoC | 0.1    | 0.1    | 5  | 3  | [10,10] |
| chr8:8786494    | MFHAS1   | coding_exon |                                                                          | - | GtoT | 0.1    | 0.1    | 2  | 2  | [10,10] |
| chr8:8680793    | MFHAS1   | UTR3        |                                                                          | - | TtoC | 0.1538 | 0.1818 | 4  | 3  | [11,18] |
| chr1:11989317   | MFN2     | coding_exon | ENST00000235329:Itov;ENST00000376320:Itov;ENST00000376337:Itov;ENST00000 | + | AtoG | 0.1    | 0.125  | 3  | 2  | [16,20] |
| chr1:11964615   | MFN2     | UTR5        |                                                                          | + | CtoA | 0.1    | 0.25   | 4  | 3  | [10,12] |
| chr22:36195079  | MFNG     | UTR3        |                                                                          | - | TtoC | 0.1    | 0.1667 | 5  | 5  | [10,34] |
| chr12:51934262  | MFSD5    | coding_exon | ENST00000329548:LtoP;                                                    | + | TtoC | 0.1667 | 0.2    | 4  | 2  | [10,12] |
| chr12:51934043  | MFSD5    | coding_exon | ENST00000329548:HtoR;                                                    | + | AtoG | 0.1    | 0.1    | 2  | 2  | [10,10] |
| chr2:191010177  | MFSD6    | coding_exon | ENST00000281416:YtoN;ENST00000392328:YtoN;                               | + | TtoA | 0.1    | 0.1333 | 2  | 2  | [10,15] |
| chr2:191074498  | MFSD6    | UTR3        |                                                                          | + | TtoG | 0.1    | 0.1    | 2  | 2  | [10,10] |
| chr15:39806743  | MGA      | coding_exon |                                                                          | + | TtoC | 0.1    | 0.1333 | 2  | 2  | [10,15] |
| chr14:49159164  | MGAT2    | mixed       |                                                                          | + | CtoA | 0.1    | 0.125  | 2  | 2  | [10,16] |
| chr5:179161064  | MGAT4B   | coding_exon | ENST00000292591:VtoG;ENST00000337755:VtoG;ENST00000429098:VtoG;          | - | TtoG | 0.1579 | 0.2    | 2  | 2  | [10,19] |
| chr2:134922873  | MGAT5    | coding_exon | ENST00000281923:Cto*;ENST00000409645:Cto*;                               | + | CtoA | 0.1    | 0.1    | 2  | 2  | [10,10] |
| chr2:134744524  | MGAT5    | coding_exon |                                                                          | + | AtoG | 0.1    | 0.1176 | 2  | 2  | [10,17] |
| chr2:134923932  | MGAT5    | UTR3        |                                                                          | + | AtoG | 0.1    | 0.125  | 2  | 2  | [10,16] |
| chr2:134926005  | MGAT5    | UTR3        |                                                                          | + | GtoA | 0.1    | 0.1667 | 3  | 2  | [10,12] |
| chr2:134928630  | MGAT5    | UTR3        |                                                                          | + | AtoG | 0.1667 | 0.1875 | 3  | 2  | [12,16] |

|                 |        |             |                                                                                      |   |      |        |        |    |    |           |
|-----------------|--------|-------------|--------------------------------------------------------------------------------------|---|------|--------|--------|----|----|-----------|
| chr10:103547721 | MGEA5  | coding_exon | ENST00000370094:CtoR;                                                                | - | TtoC | 0.1    | 0.2    | 3  | 2  | [10,10]   |
| chr10:103557497 | MGEA5  | coding_exon | ENST00000357797:TtoP;ENST00000361464:TtoN;ENST00000370094:TtoN;ENST00000370094:TtoN; | - | CtoA | 0.1    | 0.1667 | 2  | 2  | [10,12]   |
| chr10:103534216 | MGEA5  | UTR3        |                                                                                      | - | Atog | 0.1    | 0.2308 | 6  | 3  | [10,16]   |
| chr10:103535191 | MGEA5  | UTR3        |                                                                                      | - | TtoC | 0.1    | 0.1053 | 2  | 2  | [20,20]   |
| chr10:103535508 | MGEA5  | UTR3        |                                                                                      | - | CtoA | 0.1    | 0.1333 | 2  | 2  | [10,15]   |
| chr3:128892800  | MGLL   | UTR3        |                                                                                      | - | TtoC | 0.1111 | 0.129  | 5  | 2  | [18,31]   |
| chr10:131455357 | MGMT   | UTR3        |                                                                                      | + | Atog | 0.1    | 0.1    | 3  | 2  | [10,10]   |
| chr16:4679749   | MGRN1  | UTR3        |                                                                                      | + | TtoC | 0.1    | 0.1429 | 3  | 2  | [10,14]   |
| chr6:109880145  | MICAL1 | coding_exon | ENST00000358577:TtoP;ENST00000358807:TtoP;                                           | - | Atoc | 0.1351 | 0.3    | 7  | 3  | [10,37]   |
| chr19:1202895   | MIDN   | coding_exon | ENST00000300952:TtoP;ENST00000395622:TtoP;                                           | + | Atoc | 0.1053 | 0.12   | 4  | 2  | [19,25]   |
| chr19:1209544   | MIDN   | UTR3        |                                                                                      | + | GtoC | 0.1    | 0.1429 | 5  | 3  | [10,25]   |
| chr19:1210079   | MIDN   | UTR3        |                                                                                      | + | GtoA | 0.1    | 0.2    | 3  | 3  | [10,15]   |
| chr19:285517    | MIER2  | coding_exon | ENST00000264819:HtoQ;                                                                | - | TtoG | 0.1    | 0.1    | 2  | 2  | [10,10]   |
| chr3:99151548   | MINA   | coding_exon | ENST0000033396:QtoL;ENST00000394198:QtoL;ENST00000442492:QtoL;                       | - | Atot | 0.1    | 0.1    | 5  | 2  | [10,10]   |
| chr3:99168970   | MINA   | coding_exon | ENST00000330299:TtoI;ENST0000033396:TtoI;ENST00000360258:TtoI;ENST00000360258:TtoI;  | - | CtoT | 0.1538 | 0.1818 | 5  | 2  | [11,13]   |
| chr17:4730648   | MINK1  | mixed       |                                                                                      | + | TtoG | 0.125  | 0.1818 | 2  | 2  | [16,22]   |
| chr17:4734678   | MINK1  | mixed       |                                                                                      | + | TtoC | 0.1    | 0.1    | 2  | 2  | [10,10]   |
| chr17:4735528   | MINK1  | mixed       |                                                                                      | + | GtoC | 0.1    | 0.1    | 5  | 2  | [10,10]   |
| chr17:4738060   | MINK1  | mixed       |                                                                                      | + | Atoc | 0.125  | 0.1852 | 8  | 4  | [15,33]   |
| chr17:4741970   | MINK1  | mixed       |                                                                                      | + | TtoC | 0.6667 | 1      | 3  | 3  | [15,45]   |
| chr10:89301991  | MINPP1 | mixed       |                                                                                      | + | Atoc | 0.1    | 0.1    | 3  | 2  | [10,10]   |
| chr7:7601178    | MIOS   | coding_exon | ENST00000340080:WtoR;ENST00000405785:WtoR;                                           | + | TtoC | 0.1    | 0.1    | 3  | 2  | [10,20]   |
| chr7:7601257    | MIOS   | coding_exon | ENST00000340080:KtoM;ENST00000405785:KtoM;                                           | + | Atot | 0.1    | 0.1667 | 2  | 2  | [10,12]   |
| chr17:5333339   | MIS12  | mixed       |                                                                                      | + | CtoA | 0.1    | 0.1    | 4  | 3  | [10,10]   |
| chr17:5333499   | MIS12  | mixed       |                                                                                      | + | Atoc | 0.1    | 0.1538 | 3  | 2  | [10,13]   |
| chr2:99156910   | MITD1  | coding_exon |                                                                                      | - | TtoC | 0.1765 | 0.2222 | 2  | 2  | [10,17]   |
| chr10:129795004 | MKI67  | coding_exon | ENST00000368653:LtoQ;ENST00000368654:LtoQ;                                           | - | TtoA | 0.1    | 0.1667 | 4  | 2  | [10,12]   |
| chr10:129784964 | MKI67  | UTR3        |                                                                                      | - | TtoA | 0.1    | 0.1    | 3  | 2  | [10,10]   |
| chr10:129786112 | MKI67  | UTR3        |                                                                                      | - | Atog | 0.1    | 0.1    | 3  | 2  | [10,20]   |
| chr2:122201778  | MKI67P | coding_exon | ENST00000285814:NtoD;                                                                | - | Atog | 0.1    | 0.2    | 3  | 2  | [10,20]   |
| chr22:39136798  | MKL1   | UTR3        |                                                                                      | - | Atog | 0.1    | 0.1739 | 9  | 2  | [10,23]   |
| chr7:130798583  | MKLN1  | coding_exon |                                                                                      | + | TtoC | 0.1    | 0.1    | 2  | 2  | [10,10]   |
| chr7:130773150  | MKLN1  | mixed       |                                                                                      | + | TtoC | 0.1    | 0.1    | 2  | 2  | [10,10]   |
| chr7:130773159  | MKLN1  | mixed       |                                                                                      | + | TtoC | 0.1    | 0.1111 | 2  | 2  | [10,10]   |
| chr7:130828387  | MKLN1  | UTR3        |                                                                                      | + | Atog | 0.1    | 0.1818 | 2  | 2  | [10,11]   |
| chr1:46818793   | MKNK1  | coding_exon | ENST00000341183:VtoA;ENST00000342571:StoP;ENST00000371944:StoP;ENST00000371944:StoP; | - | TtoC | 0.1    | 0.1538 | 4  | 2  | [10,13]   |
| chr1:46818845   | MKNK1  | mixed       |                                                                                      | - | TtoA | 0.1    | 0.1    | 4  | 2  | [10,10]   |
| chr19:1988850   | MKNK2  | mixed       |                                                                                      | - | GtoT | 0.1011 | 0.139  | 6  | 4  | [72,376]  |
| chr19:1988854   | MKNK2  | mixed       |                                                                                      | - | GtoT | 0.1    | 0.1235 | 3  | 2  | [81,354]  |
| chr19:1989459   | MKNK2  | mixed       |                                                                                      | - | CtoT | 0.4542 | 0.484  | 2  | 2  | [252,584] |
| chr19:1990434   | MKNK2  | mixed       |                                                                                      | - | CtoT | 0.1022 | 0.1469 | 8  | 2  | [138,211] |
| chr19:1988517   | MKNK2  | UTR3        |                                                                                      | - | Atog | 0.1023 | 0.125  | 13 | 3  | [24,88]   |
| chr19:1988518   | MKNK2  | UTR3        |                                                                                      | - | Atog | 0.1    | 0.1447 | 11 | 3  | [43,78]   |
| chr19:1988647   | MKNK2  | UTR3        |                                                                                      | - | CtoA | 0.1031 | 0.1525 | 9  | 5  | [43,230]  |
| chr3:12599065   | MKRN2  | UTR3        |                                                                                      | + | TtoA | 0.1053 | 0.125  | 5  | 2  | [19,24]   |
| chr3:12599780   | MKRN2  | UTR3        |                                                                                      | + | Atog | 0.1176 | 0.1538 | 3  | 2  | [13,18]   |
| chr3:12600093   | MKRN2  | UTR3        |                                                                                      | + | CtoA | 0.1    | 0.2143 | 3  | 3  | [10,25]   |
| chr3:12600094   | MKRN2  | UTR3        |                                                                                      | + | CtoG | 0.1    | 0.2143 | 2  | 2  | [10,14]   |
| chr3:12600096   | MKRN2  | UTR3        |                                                                                      | + | GtoA | 0.1    | 0.1053 | 2  | 2  | [10,19]   |
| chr17:53638853  | MKS1   | coding_exon | ENST00000393119:FtoI;                                                                | - | TtoA | 0.1    | 0.1111 | 2  | 2  | [10,18]   |
| chr17:53648448  | MKS1   | coding_exon | ENST00000337050:EtoD;ENST00000393119:EtoD;ENST00000393120:EtoD;                      | - | GtoT | 0.1    | 0.1    | 2  | 2  | [10,10]   |
| chr12:119619228 | MLEC   | UTR3        |                                                                                      | + | Atog | 0.1034 | 0.1333 | 8  | 2  | [15,29]   |
| chr12:119620354 | MLEC   | UTR3        |                                                                                      | + | CtoG | 0.1    | 0.1579 | 2  | 2  | [19,20]   |
| chr12:119623907 | MLEC   | UTR3        |                                                                                      | + | Atog | 0.1532 | 0.2199 | 7  | 4  | [112,141] |
| chr12:119624010 | MLEC   | UTR3        |                                                                                      | + | Atog | 0.1333 | 0.1429 | 2  | 2  | [14,15]   |
| chr4:185868322  | MLF1IP | coding_exon | ENST00000281453:StoY;                                                                | - | CtoA | 0.1    | 0.1    | 2  | 2  | [10,10]   |
| chr4:185883128  | MLF1IP | coding_exon |                                                                                      | - | TtoC | 0.1    | 0.1111 | 3  | 2  | [10,36]   |
| chr4:185853185  | MLF1IP | UTR3        |                                                                                      | - | TtoC | 0.1818 | 0.2    | 4  | 2  | [10,11]   |
| chr4:185853243  | MLF1IP | UTR3        |                                                                                      | - | TtoA | 0.1    | 0.1    | 3  | 2  | [10,10]   |
| chr4:185853330  | MLF1IP | UTR3        |                                                                                      | - | TtoA | 0.1176 | 0.2    | 5  | 3  | [11,17]   |
| chr3:37067304   | MLH1   | UTR3        |                                                                                      | + | TtoA | 0.1    | 0.1    | 2  | 2  | [10,10]   |
| chr11:117881701 | MLL    | coding_exon | ENST00000354520:StoN;ENST00000359313:StoN;                                           | + | GtoA | 0.1    | 0.1    | 2  | 2  | [10,10]   |
| chr11:117854006 | MLL    | coding_exon | ENST00000354520:RtoP;ENST00000359313:RtoP;                                           | + | GtoC | 0.1    | 0.1111 | 2  | 2  | [10,10]   |
| chr11:117896765 | MLL    | coding_exon | ENST00000354520:FtoS;ENST00000359313:FtoS;                                           | + | TtoC | 0.1    | 0.1111 | 5  | 2  | [10,18]   |
| chr11:117899351 | MLL    | UTR3        |                                                                                      | + | TtoG | 0.1538 | 0.1818 | 6  | 2  | [11,13]   |
| chr11:117899760 | MLL    | UTR3        |                                                                                      | + | GtoC | 0.1    | 0.1    | 2  | 2  | [10,10]   |
| chr12:47699298  | MLL2   | UTR3        |                                                                                      | - | TtoC | 0.1    | 0.2    | 5  | 2  | [10,10]   |
| chr12:47699323  | MLL2   | UTR3        |                                                                                      | - | TtoC | 0.1    | 0.1304 | 2  | 2  | [20,23]   |
| chr12:47699888  | MLL2   | UTR3        |                                                                                      | - | GtoA | 0.1    | 0.125  | 2  | 2  | [10,17]   |
| chr12:47700029  | MLL2   | UTR3        |                                                                                      | - | Atog | 0.1    | 0.1176 | 4  | 3  | [10,17]   |
| chr12:47701036  | MLL2   | UTR3        |                                                                                      | - | TtoG | 0.1    | 0.1    | 2  | 2  | [10,10]   |
| chr12:47701060  | MLL2   | UTR3        |                                                                                      | - | TtoA | 0.1    | 0.1    | 2  | 2  | [10,10]   |
| chr7:151476867  | MLL3   | coding_exon | ENST00000262189:WtoR;ENST00000355193:WtoR;                                           | - | TtoC | 0.1    | 0.1    | 4  | 2  | [10,10]   |
| chr7:151490723  | MLL3   | coding_exon |                                                                                      | - | TtoC | 0.1    | 0.1    | 5  | 2  | [10,10]   |
| chr7:151695192  | MLL3   | coding_exon |                                                                                      | - | CtoT | 1      | 1      | 4  | 4  | [15,19]   |
| chr19:6221745   | MLLT1  | coding_exon | ENST00000252674:LtoP;                                                                | - | TtoC | 0.1    | 0.1176 | 5  | 2  | [10,17]   |
| chr10:22002343  | MLLT10 | coding_exon |                                                                                      | + | TtoC | 0.1    | 0.1    | 3  | 2  | [10,10]   |
| chr10:22071629  | MLLT10 | UTR3        |                                                                                      | + | TtoC | 0.1    | 0.2    | 2  | 2  | [10,10]   |
| chr6:168091947  | MLLT4  | coding_exon |                                                                                      | + | Atog | 0.1    | 0.1111 | 2  | 2  | [10,18]   |
| chr17:34126673  | MLLT6  | coding_exon | ENST00000325718:StoP;                                                                | + | TtoC | 0.1    | 0.1    | 2  | 2  | [10,10]   |
| chr17:34137993  | MLLT6  | UTR3        |                                                                                      | + | Atog | 0.1111 | 0.1429 | 11 | 4  | [14,27]   |
| chr17:37977893  | MLX    | UTR3        |                                                                                      | + | Atoc | 0.1667 | 0.1667 | 2  | 2  | [12,12]   |
| chr17:37977894  | MLX    | UTR3        |                                                                                      | + | GtoT | 0.1    | 0.1333 | 3  | 3  | [10,17]   |
| chr17:37978446  | MLX    | UTR3        |                                                                                      | + | Atot | 0.1053 | 0.1053 | 4  | 2  | [19,19]   |
| chr17:37978555  | MLX    | UTR3        |                                                                                      | + | Atoc | 0.1    | 0.1333 | 4  | 2  | [10,15]   |
| chr4:146786692  | MMAA   | coding_exon | ENST00000281317:TtoP;                                                                | + | Atoc | 0.1    | 0.1    | 2  | 2  | [10,10]   |
| chr1:45749309   | MMACHC | UTR3        |                                                                                      | + | GtoT | 0.6364 | 0.9167 | 3  | 3  | [10,12]   |
| chr1:45749310   | MMACHC | UTR3        |                                                                                      | + | TtoC | 0.1463 | 0.2619 | 16 | 13 | [29,113]  |
| chr17:50854049  | MMD    | coding_exon | ENST00000262065:FtoL;                                                                | - | TtoC | 0.1    | 0.1    | 6  | 2  | [10,10]   |
| chr17:50825745  | MMD    | UTR3        |                                                                                      | - | Atog | 0.1    | 0.1818 | 2  | 2  | [10,11]   |
| chr11:101899196 | MMP7   | coding_exon | ENST00000260227:IttoV;                                                               | - | Atog | 0.1    | 0.1071 | 3  | 2  | [10,28]   |
| chr10:99208103  | MMS19  | UTR3        |                                                                                      | - | TtoG | 0.1    | 0.1818 | 2  | 2  | [10,11]   |
| chr14:60344826  | MNAT1  | coding_exon | ENST00000261245:DtoG;                                                                | + | Atog | 0.1    | 0.1    | 2  | 2  | [10,10]   |
| chr19:2022040   | MOBK2A | UTR3        |                                                                                      | - | TtoC | 0.1111 | 0.3125 | 17 | 13 | [11,54]   |
| chr19:2022045   | MOBK2A | UTR3        |                                                                                      | - | Atog | 0.1818 | 0.1818 | 9  | 2  | [22,34]   |
| chr1:46846719   | MOBK2C | UTR3        |                                                                                      | - | Atog | 0.1    | 0.1    | 3  | 2  | [10,10]   |

|                |          |             |                                                                                      |   |      |        |        |    |    |          |
|----------------|----------|-------------|--------------------------------------------------------------------------------------|---|------|--------|--------|----|----|----------|
| chr1:46847009  | MOBKLC2  | UTR3        |                                                                                      | - | AtoG | 0.1    | 0.1    | 2  | 2  | [10,10]  |
| chr16:75785733 | MON1B    | coding_exon | ENST00000248248:EtoG;ENST00000439557:EtoG;                                           | + | AtoG | 0.1    | 0.1429 | 4  | 2  | [14,20]  |
| chr22:29665975 | MORC2    | coding_exon | ENST00000215862:LtoV;ENST00000397641:LtoV;                                           | - | CtoG | 0.1    | 0.1818 | 4  | 2  | [10,11]  |
| chr15:76973554 | MORF4L1  | coding_exon |                                                                                      | + | TtoC | 0.1031 | 0.1918 | 3  | 2  | [73,98]  |
| chr15:76974239 | MORF4L1  | coding_exon |                                                                                      | + | TtoC | 0.1098 | 0.2    | 3  | 2  | [45,82]  |
| chr15:76976499 | MORF4L1  | UTR3        |                                                                                      | + | TtoA | 0.1228 | 0.1875 | 11 | 3  | [49,150] |
| chr15:76976633 | MORF4L1  | UTR3        |                                                                                      | + | TtoC | 0.1538 | 0.1852 | 4  | 2  | [13,27]  |
| chr15:76977068 | MORF4L1  | UTR3        |                                                                                      | + | AtoG | 0.1111 | 0.2    | 3  | 2  | [10,18]  |
| chr1:2325023   | MORN1    | mixed       |                                                                                      | - | CtoT | 0.1    | 0.2    | 3  | 3  | [10,14]  |
| chr17:7431312  | MPDU1    | coding_exon | ENST00000250124:QtoR;ENST00000396501:RtoG;ENST00000449455:RtoG;                      | + | AtoG | 0.1333 | 0.1429 | 5  | 2  | [30,35]  |
| chr17:7432209  | MPDU1    | mixed       |                                                                                      | + | TtoC | 0.1053 | 0.1538 | 5  | 2  | [13,19]  |
| chr16:69448    | MPG      | coding_exon | ENST00000219431:QtoK;ENST00000356432:QtoK;ENST00000397817:QtoK;ENST00000406663:QtoK; | + | CtoA | 0.9855 | 1      | 19 | 19 | [12,101] |
| chr13:19122165 | MPHOSPH8 | mixed       |                                                                                      | + | AtoC | 0.1    | 0.1333 | 2  | 2  | [10,15]  |
| chr15:72977623 | MPI      | UTR3        |                                                                                      | + | GtoA | 0.1111 | 0.1667 | 7  | 3  | [10,15]  |
| chr17:16987693 | MPRI1    | mixed       |                                                                                      | + | GtoA | 0.1    | 0.1176 | 3  | 2  | [17,20]  |
| chr17:17009022 | MPRI1    | mixed       |                                                                                      | + | TtoC | 0.1    | 0.1    | 4  | 2  | [10,10]  |
| chr17:17009651 | MPRI1    | mixed       |                                                                                      | + | AtoC | 0.1    | 0.1667 | 2  | 2  | [10,12]  |
| chr17:17010265 | MPRI1    | mixed       |                                                                                      | + | TtoC | 0.1    | 0.1    | 2  | 2  | [10,10]  |
| chr17:17029006 | MPRI1    | UTR3        |                                                                                      | + | TtoG | 0.1333 | 0.1667 | 4  | 2  | [12,15]  |
| chr22:35755213 | MPST     | mixed       |                                                                                      | + | TtoC | 0.1    | 0.1538 | 3  | 2  | [10,13]  |
| chr2:27385870  | MPV17    | UTR3        |                                                                                      | - | TtoC | 0.1    | 0.1429 | 4  | 2  | [10,14]  |
| chr1:179291216 | MR1      | UTR3        |                                                                                      | + | TtoC | 0.1    | 0.1    | 2  | 2  | [10,10]  |
| chr1:179291782 | MR1      | UTR3        |                                                                                      | + | TtoC | 0.1    | 0.1    | 2  | 2  | [10,10]  |
| chr21:32608768 | MRAP     | coding_exon | ENST00000339944:VtoA;ENST00000399786:VtoA;                                           | + | TtoC | 0.1    | 0.1818 | 3  | 3  | [10,11]  |
| chr4:6693439   | MRFAP1   | UTR5        |                                                                                      | + | TtoG | 0.1667 | 0.2    | 6  | 2  | [10,18]  |
| chr4:6760486   | MRFAP1L1 | mixed       |                                                                                      | - | TtoC | 0.1053 | 0.1136 | 4  | 2  | [20,45]  |
| chr4:6760588   | MRFAP1L1 | mixed       |                                                                                      | - | CtoA | 0.1333 | 0.2    | 3  | 3  | [10,15]  |
| chr19:13737940 | MR11     | coding_exon | ENST0000040663:LtoV;ENST00000445479:LtoV;                                            | + | CtoG | 0.1053 | 0.2308 | 3  | 3  | [13,19]  |
| chr19:13737941 | MR11     | coding_exon | ENST0000040663:LtoP;ENST00000445479:LtoP;                                            | + | TtoC | 0.1176 | 0.3333 | 3  | 3  | [12,17]  |
| chr19:13740429 | MR11     | coding_exon | ENST0000040663:EtoG;ENST00000319545:EtoG;ENST00000445479:EtoG;                       | + | AtoG | 0.15   | 0.2    | 4  | 2  | [10,20]  |
| chr17:32032637 | MRM1     | coding_exon |                                                                                      | + | GtoA | 0.1    | 0.2308 | 3  | 2  | [10,13]  |
| chr17:32039453 | MRM1     | UTR3        |                                                                                      | + | GtoT | 0.1333 | 0.16   | 2  | 2  | [15,25]  |
| chr13:20649638 | MRP63    | mixed       |                                                                                      | + | CtoA | 0.1    | 0.1    | 2  | 2  | [10,10]  |
| chr13:20649640 | MRP63    | mixed       |                                                                                      | + | AtoG | 0.125  | 0.2    | 2  | 2  | [10,16]  |
| chr11:65959891 | MRPL11   | UTR3        |                                                                                      | - | TtoG | 0.1111 | 0.1818 | 4  | 2  | [10,11]  |
| chr17:77284947 | MRPL12   | UTR3        |                                                                                      | + | AtoG | 0.1429 | 0.1765 | 2  | 2  | [14,17]  |
| chr17:77280832 | MRPL12   | UTR5        |                                                                                      | + | TtoA | 0.1333 | 0.3    | 2  | 2  | [10,15]  |
| chr6:44189432  | MRPL14   | UTR3        |                                                                                      | - | TtoC | 0.1389 | 0.1579 | 4  | 2  | [20,36]  |
| chr11:59330268 | MRPL16   | UTR3        |                                                                                      | - | TtoA | 0.1    | 0.1176 | 4  | 2  | [10,18]  |
| chr6:160139295 | MRPL18   | UTR3        |                                                                                      | + | TtoC | 0.1111 | 0.1143 | 6  | 2  | [19,70]  |
| chr1:154973754 | MRPL24   | UTR3        |                                                                                      | - | CtoT | 0.2821 | 0.2927 | 2  | 2  | [39,41]  |
| chr16:357701   | MRPL28   | coding_exon | ENST00000199706:VtoG;ENST00000389675:VtoG;ENST00000397734:VtoG;ENST00000406663:VtoG; | - | TtoG | 0.102  | 0.2157 | 3  | 2  | [49,51]  |
| chr16:357704   | MRPL28   | coding_exon | ENST00000199706:VtoG;ENST00000389675:VtoG;ENST00000397734:VtoG;ENST00000406663:VtoG; | - | TtoG | 0.1538 | 0.2308 | 4  | 2  | [26,53]  |
| chr16:357402   | MRPL28   | UTR3        |                                                                                      | - | CtoG | 0.125  | 0.1333 | 2  | 2  | [15,16]  |
| chr2:99180331  | MRPL30   | UTR3        |                                                                                      | + | CtoA | 0.1    | 0.1111 | 3  | 2  | [10,11]  |
| chr19:17277709 | MRPL34   | coding_exon | ENST00000252602:VtoG;                                                                | + | TtoG | 0.16   | 0.2143 | 5  | 2  | [14,25]  |
| chr2:86293020  | MRPL35   | mixed       |                                                                                      | + | AtoG | 0.1111 | 0.125  | 5  | 2  | [16,18]  |
| chr21:25879898 | MRPL39   | mixed       |                                                                                      | - | TtoG | 0.1    | 0.1667 | 3  | 2  | [10,12]  |
| chr12:92405412 | MRPL42   | coding_exon |                                                                                      | + | TtoC | 0.1    | 0.3    | 9  | 6  | [10,55]  |
| chr17:33732574 | MRPL45   | UTR3        |                                                                                      | + | TtoC | 0.1    | 0.1429 | 2  | 2  | [10,14]  |
| chr17:33732579 | MRPL45   | UTR3        |                                                                                      | + | AtoG | 0.2222 | 0.3    | 3  | 2  | [10,10]  |
| chr11:73193758 | MRPL48   | coding_exon |                                                                                      | + | CtoG | 0.1    | 0.1    | 2  | 2  | [10,10]  |
| chr11:73253284 | MRPL48   | UTR3        |                                                                                      | + | TtoC | 0.1    | 0.1818 | 2  | 2  | [10,11]  |
| chr9:103192514 | MRPL50   | UTR3        |                                                                                      | - | TtoG | 0.1111 | 0.15   | 12 | 4  | [10,20]  |
| chr12:6471588  | MRPL51   | UTR3        |                                                                                      | - | GtoA | 0.1    | 0.1    | 2  | 2  | [10,10]  |
| chr12:6471592  | MRPL51   | UTR3        |                                                                                      | - | TtoC | 0.1    | 0.3333 | 14 | 11 | [10,62]  |
| chr14:22373397 | MRPL52   | UTR3        |                                                                                      | + | CtoA | 0.1    | 0.1538 | 3  | 3  | [10,18]  |
| chr2:74552630  | MRPL53   | UTR3        |                                                                                      | - | CtoG | 0.1    | 0.125  | 6  | 2  | [10,24]  |
| chr1:226361013 | MRPL55   | UTR3        |                                                                                      | - | TtoC | 0.1    | 0.1818 | 6  | 3  | [10,13]  |
| chr1:226361016 | MRPL55   | UTR3        |                                                                                      | - | AtoG | 0.1    | 0.1    | 3  | 2  | [10,20]  |
| chr1:173259131 | MRPS14   | coding_exon | ENST00000476371:FtoV;                                                                | - | TtoG | 0.1    | 0.1429 | 2  | 2  | [10,14]  |
| chr1:36693980  | MRPS15   | coding_exon | ENST00000373116:QtoR;                                                                | - | AtoG | 0.1    | 0.2143 | 7  | 6  | [10,23]  |
| chr1:36693985  | MRPS15   | coding_exon | ENST00000373116:DtoE;                                                                | - | CtoG | 0.1538 | 0.2353 | 5  | 2  | [13,17]  |
| chr10:74679260 | MRPS16   | mixed       |                                                                                      | - | TtoA | 0.1053 | 0.1304 | 3  | 2  | [19,23]  |
| chr10:74679415 | MRPS16   | mixed       |                                                                                      | - | TtoG | 0.1034 | 0.1429 | 8  | 4  | [14,38]  |
| chr10:74680504 | MRPS16   | mixed       |                                                                                      | - | GtoA | 0.1    | 0.1875 | 8  | 3  | [10,32]  |
| chr6:43754319  | MRPS18A  | coding_exon | ENST00000372116:TtoA;ENST00000372118:TtoA;ENST00000372133:TtoA;                      | - | AtoG | 0.1    | 0.1818 | 2  | 2  | [10,11]  |
| chr6:30702142  | MRPS18B  | UTR3        |                                                                                      | + | TtoC | 0.1064 | 0.3333 | 11 | 7  | [10,47]  |
| chr7:43872706  | MRPS24   | UTR3        |                                                                                      | - | TtoA | 0.1    | 0.1    | 2  | 2  | [10,10]  |
| chr3:15059458  | MRPS25   | mixed       |                                                                                      | - | GtoT | 0.1    | 0.1    | 2  | 2  | [10,10]  |
| chr3:15068718  | MRPS25   | mixed       |                                                                                      | - | GtoA | 0.1    | 0.2    | 7  | 4  | [10,19]  |
| chr3:15068732  | MRPS25   | mixed       |                                                                                      | - | GtoA | 0.1053 | 0.1429 | 8  | 3  | [14,19]  |
| chr3:15066245  | MRPS25   | UTR3        |                                                                                      | - | TtoC | 0.1    | 0.1667 | 2  | 2  | [10,12]  |
| chr5:71645702  | MRPS27   | coding_exon | ENST00000261413:HtoR;ENST00000457646:HtoR;                                           | - | AtoG | 0.1    | 0.1    | 6  | 2  | [10,10]  |
| chr8:81104836  | MRPS28   | coding_exon | ENST00000276585:PtoL;                                                                | - | CtoT | 0.125  | 0.1818 | 4  | 2  | [11,16]  |
| chr8:81104827  | MRPS28   | coding_exon | ENST00000276585:KtoR;                                                                | - | AtoG | 0.1111 | 0.2857 | 7  | 3  | [14,27]  |
| chr8:81104828  | MRPS28   | coding_exon | ENST00000276585:KtoQ;                                                                | - | AtoC | 0.2667 | 0.2857 | 4  | 2  | [14,15]  |
| chr8:81104835  | MRPS28   | coding_exon |                                                                                      | - | CtoT | 0.129  | 0.2308 | 4  | 3  | [13,31]  |
| chr13:40201610 | MRPS31   | coding_exon |                                                                                      | - | AtoG | 0.1    | 0.125  | 4  | 2  | [10,16]  |
| chr5:68567023  | MRPS36   | mixed       |                                                                                      | + | TtoC | 0.1111 | 0.1481 | 3  | 2  | [27,27]  |
| chr2:95139445  | MRPS5    | coding_exon | ENST00000272418:KtoE;                                                                | - | AtoG | 0.1176 | 0.1364 | 3  | 2  | [17,22]  |
| chr6:24523344  | MRS2     | mixed       |                                                                                      | + | GtoC | 0.1053 | 0.1667 | 4  | 2  | [12,19]  |
| chr6:24531199  | MRS2     | mixed       |                                                                                      | + | TtoG | 0.1429 | 0.5    | 3  | 2  | [12,21]  |
| chr6:24532044  | MRS2     | UTR3        |                                                                                      | + | CtoT | 0.1    | 0.1    | 2  | 2  | [10,10]  |
| chr1:19458969  | MRT04    | UTR3        |                                                                                      | + | TtoA | 0.1    | 0.2308 | 3  | 3  | [10,13]  |
| chr11:59994108 | MS4A1    | UTR3        |                                                                                      | + | CtoA | 0.1    | 0.2273 | 8  | 5  | [10,27]  |
| chr11:59986231 | MS4A1    | UTR5        |                                                                                      | + | CtoA | 0.7273 | 1      | 2  | 2  | [10,11]  |
| chr8:72916763  | MSC      | UTR3        |                                                                                      | - | TtoA | 0.4481 | 0.4615 | 2  | 2  | [52,242] |
| chr2:47490745  | MSH2     | mixed       |                                                                                      | + | TtoC | 0.1    | 0.1    | 4  | 2  | [10,10]  |
| chr2:47547371  | MSH2     | mixed       |                                                                                      | + | TtoC | 0.1    | 0.1176 | 5  | 2  | [10,17]  |
| chr2:47555824  | MSH2     | mixed       |                                                                                      | + | AtoG | 0.1    | 0.25   | 5  | 2  | [10,16]  |
| chr2:47563832  | MSH2     | mixed       |                                                                                      | + | TtoA | 0.1    | 0.2    | 6  | 2  | [10,10]  |
| chr5:80207417  | MSH3     | coding_exon | ENST00000265081:QtoE;                                                                | + | CtoG | 0.1    | 0.1    | 3  | 2  | [10,10]  |
| chr6:31834932  | MSH5     | mixed       |                                                                                      | + | TtoA | 0.1    | 0.2308 | 3  | 2  | [10,13]  |
| chr6:31835952  | MSH5     | mixed       |                                                                                      | + | AtoG | 0.1    | 0.2    | 4  | 2  | [10,21]  |
| chr2:47879256  | MSH6     | coding_exon |                                                                                      | + | AtoG | 0.1154 | 0.1333 | 5  | 2  | [15,27]  |

|                 |         |             |                                                                                                                  |   |      |        |        |    |   |          |
|-----------------|---------|-------------|------------------------------------------------------------------------------------------------------------------|---|------|--------|--------|----|---|----------|
| chr17:52833739  | MSI2    | coding_exon | ENST00000284073:MtoV;ENST00000322684:MtoV;ENST00000416426:MtoV;ENST                                              | + | AtaG | 0.125  | 0.2857 | 4  | 2 | [21,24]  |
| chr17:35541317  | MSL1    | coding_exon | ENST00000339569:RtoS;ENST00000398532:RtoS;                                                                       | + | GtoT | 0.1    | 0.1818 | 7  | 3 | [11,20]  |
| chr17:35539033  | MSL1    | coding_exon |                                                                                                                  | + | AtaG | 0.1    | 0.1026 | 3  | 2 | [10,39]  |
| chr17:35545056  | MSL1    | UTR3        |                                                                                                                  | + | TtoC | 0.1053 | 0.2    | 2  | 2 | [10,20]  |
| chr3:137353522  | MSL2    | coding_exon |                                                                                                                  | - | TtoA | 0.1    | 0.1    | 2  | 2 | [10,10]  |
| chr16:55200849  | MT2A    | UTR3        |                                                                                                                  | + | CtoA | 0.1176 | 0.2143 | 6  | 2 | [14,17]  |
| chr14:105007919 | MTA1    | UTR3        |                                                                                                                  | + | TtoC | 0.1034 | 0.1111 | 8  | 3 | [18,37]  |
| chr11:62117313  | MTA2    | UTR3        |                                                                                                                  | - | TtoC | 0.1111 | 0.2083 | 14 | 8 | [10,34]  |
| chr11:62117518  | MTA2    | UTR3        |                                                                                                                  | - | TtoA | 0.1    | 0.1053 | 3  | 2 | [10,19]  |
| chr2:42659827   | MTA3    | coding_exon | ENST00000405094:LtoP;ENST00000405592:LtoP;ENST00000406652:LtoP;ENST000                                           | + | TtoC | 0.1    | 0.1538 | 8  | 2 | [10,13]  |
| chr6:37045370   | MTCH1   | coding_exon |                                                                                                                  | - | TtoC | 0.1    | 0.1538 | 2  | 2 | [10,13]  |
| chr11:47607128  | MTCH2   | coding_exon | ENST00000302503:CtoG;                                                                                            | - | TtoG | 0.102  | 0.1304 | 11 | 5 | [63,98]  |
| chr8:98806531   | MTDH    | UTR3        |                                                                                                                  | + | AtaC | 0.1667 | 0.1667 | 7  | 2 | [12,18]  |
| chr8:98807707   | MTDH    | UTR3        |                                                                                                                  | + | TtoC | 0.1    | 0.1    | 2  | 2 | [10,20]  |
| chr8:98807712   | MTDH    | UTR3        |                                                                                                                  | + | AtaG | 0.1    | 0.1667 | 2  | 2 | [12,30]  |
| chr8:98809278   | MTDH    | UTR3        |                                                                                                                  | + | TtoC | 0.1176 | 0.3    | 5  | 4 | [10,17]  |
| chr2:241685401  | MTERFD2 | coding_exon | ENST00000391980:VtoA;ENST00000406593:VtoA;ENST00000407095:VtoA;                                                  | - | TtoC | 0.1333 | 0.2143 | 4  | 2 | [14,15]  |
| chr2:241676558  | MTERFD2 | mixed       |                                                                                                                  | - | GtoA | 0.1    | 0.1    | 2  | 2 | [10,10]  |
| chr1:93317547   | MTF2    | UTR5        |                                                                                                                  | + | AtaG | 0.125  | 0.1538 | 3  | 2 | [13,16]  |
| chr10:135064898 | MTG1    | coding_exon |                                                                                                                  | + | TtoA | 0.1    | 0.25   | 2  | 2 | [10,16]  |
| chr10:135083969 | MTG1    | UTR3        |                                                                                                                  | + | TtoA | 0.1111 | 0.1579 | 4  | 2 | [10,21]  |
| chr15:77978398  | MTFH5   | mixed       |                                                                                                                  | - | CtoT | 0.2308 | 0.6429 | 3  | 3 | [13,16]  |
| chr13:26912392  | MTIF3   | coding_exon | ENST00000381116:GtoE;ENST00000381120:GtoE;ENST00000405591:GtoE;ENST000                                           | - | GtoA | 0.1    | 0.1333 | 3  | 2 | [10,15]  |
| chr13:26912412  | MTIF3   | coding_exon |                                                                                                                  | - | TtoG | 0.125  | 0.1429 | 4  | 2 | [14,16]  |
| chr15:29022080  | MTMR10  | mixed       |                                                                                                                  | - | GtoA | 0.125  | 0.1538 | 5  | 2 | [13,16]  |
| chr15:29018863  | MTMR10  | UTR3        |                                                                                                                  | - | AtaG | 0.1    | 0.1    | 2  | 2 | [10,10]  |
| chr11:95207026  | MTMR2   | UTR3        |                                                                                                                  | - | TtoG | 0.1    | 0.1818 | 4  | 2 | [11,11]  |
| chr11:95207937  | MTMR2   | UTR3        |                                                                                                                  | - | TtoC | 0.1    | 0.1    | 2  | 2 | [10,10]  |
| chr22:29011282  | MTMR3   | mixed       |                                                                                                                  | + | TtoC | 0.1    | 0.1    | 2  | 2 | [10,10]  |
| chr22:29059127  | MTMR3   | mixed       |                                                                                                                  | + | AtaG | 0.1    | 0.1    | 2  | 2 | [10,10]  |
| chr22:29060039  | MTMR3   | mixed       |                                                                                                                  | + | AtaT | 0.125  | 0.1538 | 11 | 2 | [13,16]  |
| chr22:29068221  | MTMR3   | mixed       |                                                                                                                  | + | AtaC | 0.1111 | 0.125  | 4  | 2 | [81,162] |
| chr22:29153204  | MTMR3   | mixed       |                                                                                                                  | + | TtoG | 0.1207 | 0.2571 | 5  | 2 | [58,106] |
| chr22:29652830  | MTMR3   | mixed       |                                                                                                                  | + | AtaG | 0.1    | 0.1176 | 2  | 2 | [10,17]  |
| chr22:29696785  | MTMR3   | mixed       |                                                                                                                  | + | TtoC | 0.1    | 0.1667 | 3  | 2 | [10,12]  |
| chr22:29699574  | MTMR3   | mixed       |                                                                                                                  | + | GtoC | 0.1538 | 0.3    | 6  | 4 | [10,17]  |
| chr22:29701776  | MTMR3   | mixed       |                                                                                                                  | + | TtoA | 0.1    | 0.1538 | 3  | 2 | [10,13]  |
| chr22:28751950  | MTMR3   | UTR3        |                                                                                                                  | + | TtoC | 0.1    | 0.1    | 2  | 2 | [10,10]  |
| chr22:28753586  | MTMR3   | UTR3        |                                                                                                                  | + | GtoA | 0.1    | 0.1    | 3  | 2 | [10,20]  |
| chr17:53939667  | MTMR4   | coding_exon | ENST00000323456:NtoK;                                                                                            | - | TtoG | 0.1    | 0.1    | 3  | 2 | [10,10]  |
| chr6:74258783   | MTQ1    | coding_exon | ENST00000357845:RtoS;ENST00000370300:RtoS;ENST00000370305:RtoS;ENST000                                           | + | AtaC | 0.1    | 0.3    | 3  | 2 | [10,10]  |
| chr1:11099657   | MTOR    | coding_exon | ENST00000361445:LtoP;ENST00000376838:LtoP;                                                                       | - | TtoC | 0.1    | 0.1111 | 3  | 2 | [10,18]  |
| chr1:11090143   | MTOR    | coding_exon | ENST00000361445:CtoG;ENST00000376838:CtoG;                                                                       | - | TtoG | 0.1111 | 0.1176 | 4  | 2 | [17,18]  |
| chr1:235092241  | MTR     | coding_exon | ENST00000366577:VtoA;ENST00000417743:VtoA;                                                                       | + | TtoC | 0.1    | 0.1    | 2  | 2 | [10,10]  |
| chr13:40760886  | MTRF1   | coding_exon | ENST00000379477:AtoS;ENST00000379480:AtoS;ENST00000430347:AtoS;                                                  | + | GtoT | 0.1    | 0.1429 | 3  | 2 | [10,14]  |
| chr2:176896369  | MTX2    | coding_exon | ENST00000249442:FtoV;ENST00000392529:FtoV;                                                                       | + | TtoG | 0.1    | 0.2    | 4  | 2 | [10,10]  |
| chr2:176910654  | MTX2    | UTR3        |                                                                                                                  | + | TtoC | 0.1538 | 0.1818 | 4  | 2 | [11,13]  |
| chr14:56816774  | MUDENG  | coding_exon | ENST00000261558:StoP;ENST00000431972:StoP;                                                                       | + | TtoC | 0.1    | 0.1429 | 3  | 2 | [10,14]  |
| chr14:56811318  | MUDENG  | coding_exon |                                                                                                                  | + | TtoG | 0.1    | 0.125  | 4  | 2 | [10,16]  |
| chr14:56825908  | MUDENG  | UTR3        |                                                                                                                  | + | AtaG | 0.1    | 0.1    | 2  | 2 | [10,10]  |
| chr1:20699402   | MUL1    | UTR3        |                                                                                                                  | - | TtoC | 0.1    | 0.1    | 2  | 2 | [10,10]  |
| chr19:1315544   | MUM1    | coding_exon | ENST00000311401:HtoR;ENST00000344663:HtoR;ENST00000415183:HtoR;                                                  | + | AtaG | 0.1    | 0.1176 | 6  | 2 | [10,17]  |
| chr1:45569455   | MUTYH   | coding_exon | ENST00000354383:TtoP;ENST0000035498:TtoP;ENST00000372098:TtoP;ENST000                                            | - | AtaC | 0.1    | 0.1765 | 7  | 4 | [10,22]  |
| chr16:29766838  | MVP     | UTR3        |                                                                                                                  | + | TtoC | 0.1667 | 0.2917 | 6  | 4 | [13,26]  |
| chr21:41733614  | MX1     | coding_exon | ENST00000288383:VtoG;ENST00000398598:VtoG;ENST00000398600:VtoG;ENST000                                           | + | TtoG | 0.1009 | 0.2    | 15 | 9 | [34,308] |
| chr21:41729735  | MX1     | coding_exon |                                                                                                                  | + | CtoA | 0.1111 | 0.125  | 4  | 3 | [10,19]  |
| chr21:41753006  | MX1     | UTR3        |                                                                                                                  | + | CtoA | 0.1    | 0.2286 | 7  | 2 | [10,37]  |
| chr21:41753007  | MX1     | UTR3        |                                                                                                                  | + | AtaG | 0.1176 | 0.2703 | 5  | 2 | [17,37]  |
| chr21:41753008  | MX1     | UTR3        |                                                                                                                  | + | GtoA | 0.1111 | 0.2105 | 10 | 5 | [15,24]  |
| chr21:41753009  | MX1     | UTR3        |                                                                                                                  | + | AtaG | 0.1089 | 0.1429 | 5  | 2 | [14,112] |
| chr21:41753010  | MX1     | UTR3        |                                                                                                                  | + | CtoA | 0.6667 | 1      | 9  | 9 | [10,36]  |
| chr21:41725842  | MX1     | UTR5        |                                                                                                                  | + | TtoC | 0.1818 | 0.1818 | 6  | 2 | [11,11]  |
| chr21:41725843  | MX1     | UTR5        |                                                                                                                  | + | TtoC | 0.1    | 0.1538 | 8  | 2 | [10,13]  |
| chr21:41702707  | MX2     | UTR3        |                                                                                                                  | + | AtaG | 0.1    | 0.1429 | 2  | 2 | [10,14]  |
| chr10:112035621 | MX11    | UTR3        |                                                                                                                  | + | AtaG | 0.1429 | 0.1667 | 4  | 2 | [12,14]  |
| chr6:135557262  | MYB     | coding_exon | ENST00000237302:NtoD;ENST00000316528:NtoD;ENST00000341911:NtoD;ENST000                                           | + | AtaG | 0.1    | 0.1    | 3  | 2 | [10,20]  |
| chr6:135581803  | MYB     | UTR3        |                                                                                                                  | + | AtaG | 0.1    | 0.1111 | 5  | 2 | [10,18]  |
| chr13:76523234  | MYCBP2  | coding_exon | ENST00000357337:VtoG;ENST00000407578:VtoG;                                                                       | - | TtoG | 0.1111 | 0.1579 | 4  | 2 | [19,36]  |
| chr13:76641793  | MYCBP2  | coding_exon | ENST00000357337:LtoR;ENST00000407578:LtoR;                                                                       | - | TtoG | 0.1    | 0.1034 | 5  | 2 | [11,29]  |
| chr13:76597486  | MYCBP2  | coding_exon | ENST00000357337:LtoP;ENST00000407578:LtoP;                                                                       | - | TtoC | 0.1    | 0.1538 | 5  | 2 | [10,13]  |
| chr13:76662412  | MYCBP2  | coding_exon | ENST00000357337:GtoD;ENST00000407578:GtoD;                                                                       | - | GtoA | 0.1    | 0.1    | 4  | 2 | [10,10]  |
| chr13:76569795  | MYCBP2  | coding_exon |                                                                                                                  | - | TtoG | 0.15   | 0.1538 | 9  | 2 | [13,21]  |
| chr13:76517037  | MYCBP2  | UTR3        |                                                                                                                  | - | CtoA | 0.1    | 0.25   | 3  | 2 | [10,12]  |
| chr13:76517328  | MYCBP2  | UTR3        |                                                                                                                  | - | TtoA | 0.1538 | 0.1538 | 9  | 2 | [13,13]  |
| chr15:46228847  | MYEF2   | coding_exon |                                                                                                                  | - | TtoC | 0.1429 | 0.2    | 5  | 2 | [10,14]  |
| chr15:46246888  | MYEF2   | mixed       |                                                                                                                  | - | GtoT | 0.1    | 0.1    | 2  | 2 | [10,10]  |
| chr15:46221699  | MYEF2   | UTR3        |                                                                                                                  | - | TtoA | 0.1    | 0.2222 | 2  | 2 | [10,10]  |
| chr17:8357846   | MYH10   | coding_exon | ENST00000269243:WtoG;ENST00000360416:WtoG;ENST00000379980:WtoG;ENST                                              | - | TtoG | 0.1    | 0.1111 | 2  | 2 | [10,10]  |
| chr17:8337792   | MYH10   | coding_exon | ENST00000269243:LtoP;ENST00000360416:LtoP;ENST00000379980:LtoP;ENST000                                           | - | TtoC | 0.1    | 0.1111 | 4  | 2 | [10,18]  |
| chr17:8318433   | MYH10   | UTR3        |                                                                                                                  | - | TtoG | 0.1111 | 0.2    | 2  | 2 | [10,10]  |
| chr16:15725832  | MYH11   | coding_exon |                                                                                                                  | - | TtoC | 0.1    | 0.1    | 4  | 2 | [10,20]  |
| chr16:15726520  | MYH11   | coding_exon |                                                                                                                  | - | GtoT | 0.1111 | 0.1765 | 4  | 2 | [10,17]  |
| chr22:35028580  | MYH9    | coding_exon | ENST00000216181:WtoG;ENST00000378118:WtoG;ENST00000438303:WtoG;                                                  | - | TtoG | 0.1053 | 0.2083 | 3  | 3 | [19,56]  |
| chr22:35007282  | MYH9    | UTR3        |                                                                                                                  | - | AtaT | 0.1    | 0.1    | 3  | 3 | [10,20]  |
| chr18:3243982   | MYL12A  | coding_exon | ENST00000217652:LtoI;                                                                                            | + | TtoA | 0.1    | 0.1538 | 6  | 2 | [11,13]  |
| chr18:3245809   | MYL12A  | coding_exon | ENST00000217652:EtoK;                                                                                            | + | GtoA | 0.1    | 0.1818 | 2  | 2 | [10,11]  |
| chr18:3244005   | MYL12A  | coding_exon |                                                                                                                  | + | TtoC | 0.2727 | 0.6364 | 7  | 7 | [10,26]  |
| chr18:3246194   | MYL12A  | UTR3        |                                                                                                                  | + | TtoC | 0.1    | 0.1176 | 6  | 4 | [10,20]  |
| chr18:3237812   | MYL12A  | UTR5        |                                                                                                                  | + | AtaG | 0.1333 | 0.1667 | 2  | 2 | [12,16]  |
| chr18:3237816   | MYL12A  | UTR5        |                                                                                                                  | + | GtoT | 0.1111 | 0.1176 | 3  | 2 | [17,18]  |
| chr18:3267820   | MYL12B  | coding_exon | ENST00000237500:TtoR;ENST00000400174:TtoR;ENST00000400175:TtoR;ENST000                                           | + | CtoG | 0.1    | 0.1538 | 2  | 2 | [10,13]  |
| chr18:3267847   | MYL12B  | coding_exon | ENST00000237500:RtoT;ENST00000400174:RtoT;ENST00000400175:RtoT;ENST000                                           | + | GtoC | 0.3636 | 0.5385 | 3  | 3 | [10,13]  |
| chr18:3267897   | MYL12B  | coding_exon | ENST00000237500:RtoS;ENST00000400174:RtoS;ENST00000400175:RtoS;ENST000                                           | + | CtoA | 0.1    | 0.5    | 3  | 2 | [10,24]  |
| chr18:3267804   | MYL12B  | coding_exon | ENST00000237500:MtoV;ENST00000400174:MtoV;ENST00000400175:MtoV;ENST                                              | + | AtaG | 0.1061 | 0.1803 | 8  | 3 | [61,124] |
| chr18:3262970   | MYL12B  | coding_exon | ENST00000237500:MtoT;ENST00000400174:MtoT;ENST00000400175:MtoT;ENST                                              | + | TtoC | 0.1818 | 0.1923 | 3  | 2 | [11,26]  |
| chr18:3267347   | MYL12B  | coding_exon | ENST00000237500:Lto* <sup>+</sup> ;ENST00000400174:Lto* <sup>+</sup> ;ENST00000400175:Lto* <sup>+</sup> ;ENST000 | + | TtoG | 0.1    | 0.1818 | 4  | 2 | [10,11]  |



|                |          |             |                                                                          |   |      |        |        |    |    |           |
|----------------|----------|-------------|--------------------------------------------------------------------------|---|------|--------|--------|----|----|-----------|
| chr18:3267900  | MYL12B   | coding_exon | ENST00000237500:Itov;ENST00000400174:Itov;ENST00000400175:Itov;ENST00000 | + | AtoG | 0.1    | 0.1111 | 4  | 2  | [10,18]   |
| chr18:3267822  | MYL12B   | coding_exon | ENST00000237500:DtoY;ENST00000400174:DtoY;ENST00000400175:DtoY;ENST000   | + | GtoT | 0.1    | 0.1667 | 3  | 2  | [10,12]   |
| chr18:3267384  | MYL12B   | coding_exon |                                                                          | + | CtoT | 0.146  | 0.1636 | 6  | 2  | [55,139]  |
| chr18:3267785  | MYL12B   | coding_exon |                                                                          | + | AtoG | 0.1119 | 0.1406 | 7  | 2  | [128,295] |
| chr18:3267821  | MYL12B   | coding_exon |                                                                          | + | AtoG | 0.1    | 0.35   | 8  | 8  | [10,20]   |
| chr18:3267869  | MYL12B   | coding_exon |                                                                          | + | GtoA | 0.1    | 0.1333 | 2  | 2  | [10,15]   |
| chr18:3267890  | MYL12B   | coding_exon |                                                                          | + | GtoA | 0.6364 | 0.7143 | 2  | 2  | [11,21]   |
| chr18:3268180  | MYL12B   | UTR3        |                                                                          | + | AtoG | 0.1034 | 0.1846 | 13 | 3  | [29,65]   |
| chr18:3268181  | MYL12B   | UTR3        |                                                                          | + | GtoA | 0.1026 | 0.1081 | 9  | 2  | [38,40]   |
| chr18:3268182  | MYL12B   | UTR3        |                                                                          | + | AtoG | 0.1053 | 0.1111 | 5  | 2  | [18,19]   |
| chr4:662807    | MYL5     | coding_exon | ENST00000400159:TtoA;                                                    | + | AtoG | 0.1    | 0.1053 | 2  | 2  | [10,19]   |
| chr4:662501    | MYL5     | coding_exon | ENST00000400159:StoP;                                                    | + | TtoC | 0.1    | 0.1    | 2  | 2  | [10,10]   |
| chr12:54841622 | MYL6     | UTR3        |                                                                          | + | TtoC | 0.1065 | 0.1585 | 15 | 7  | [77,186]  |
| chr12:54841624 | MYL6     | UTR3        |                                                                          | + | GtoA | 0.1111 | 0.2444 | 11 | 9  | [35,65]   |
| chr12:54841625 | MYL6     | UTR3        |                                                                          | + | GtoA | 0.1061 | 0.25   | 12 | 5  | [25,66]   |
| chr12:54841626 | MYL6     | UTR3        |                                                                          | + | CtoA | 0.1176 | 0.6    | 16 | 16 | [12,203]  |
| chr12:54841628 | MYL6     | UTR3        |                                                                          | + | CtoA | 0.1667 | 0.2    | 5  | 2  | [10,12]   |
| chr6:16253324  | MYLIP    | coding_exon | ENST00000349606:StoP;ENST00000356840:StoP;                               | + | TtoC | 0.1    | 0.1333 | 2  | 2  | [10,15]   |
| chr6:16253163  | MYLIP    | coding_exon | ENST00000349606:HtoR;ENST00000356840:HtoR;                               | + | AtoG | 0.1    | 0.1    | 5  | 2  | [10,10]   |
| chr6:16255349  | MYLIP    | UTR3        |                                                                          | + | AtoG | 0.1    | 0.1    | 2  | 2  | [10,10]   |
| chr3:70979928  | MYNN     | coding_exon | ENST00000349841:StoR;ENST00000356716:StoR;ENST00000392733:StoR;          | + | CtoG | 0.1    | 0.125  | 2  | 2  | [10,16]   |
| chr17:24466496 | MYO18A   | coding_exon | ENST00000354329:RtoW;ENST00000354682:RtoW;ENST00000399229:RtoW;ENST      | - | AtoT | 0.125  | 0.125  | 2  | 2  | [16,16]   |
| chr17:31941403 | MYO19    | coding_exon | ENST00000268852:LtoR;ENST00000378326:LtoR;ENST00000415126:LtoR;ENST000   | - | TtoG | 0.1176 | 0.2143 | 9  | 5  | [10,17]   |
| chr17:31941404 | MYO19    | coding_exon | ENST00000268852:LtoI;ENST00000378326:LtoI;ENST00000415126:LtoI;ENST00000 | - | CtoA | 0.1    | 0.25   | 9  | 7  | [10,18]   |
| chr17:31925818 | MYO19    | UTR3        |                                                                          | - | AtoG | 0.1    | 0.1538 | 5  | 4  | [10,21]   |
| chr17:1328486  | MYO1C    | coding_exon | ENST00000359786:DtoE;ENST00000361007:DtoE;ENST00000438665:DtoE;          | - | TtoA | 0.1111 | 0.125  | 2  | 2  | [16,18]   |
| chr17:27846046 | MYO1D    | coding_exon | ENST00000318217:StoR;                                                    | - | TtoA | 0.1    | 0.1053 | 4  | 2  | [10,19]   |
| chr15:57215859 | MYO1E    | UTR3        |                                                                          | - | GtoA | 0.1538 | 0.4    | 5  | 4  | [10,14]   |
| chr15:57215864 | MYO1E    | UTR3        |                                                                          | - | TtoC | 0.1    | 0.1    | 3  | 2  | [10,10]   |
| chr15:57452175 | MYO1E    | UTR5        |                                                                          | - | AtoC | 0.1    | 0.1    | 2  | 2  | [10,10]   |
| chr15:50400922 | MYO5A    | coding_exon | ENST00000356338:VtoG;ENST00000358212:VtoG;ENST00000399229:VtoG;ENST00    | - | TtoG | 0.1    | 0.1429 | 3  | 3  | [10,14]   |
| chr15:50455992 | MYO5A    | coding_exon | ENST00000356338:VtoA;ENST00000358212:VtoA;ENST00000399229:VtoA;ENST00    | - | TtoC | 0.1    | 0.1    | 2  | 2  | [10,20]   |
| chr15:50400955 | MYO5A    | coding_exon | ENST00000356338:LtoP;ENST00000358212:LtoP;ENST00000399229:LtoP;ENST000   | - | TtoC | 0.1    | 0.1538 | 6  | 3  | [10,14]   |
| chr15:50407418 | MYO5A    | coding_exon | ENST00000356338:AtoT;ENST00000358212:AtoT;ENST00000399229:AtoT;ENST00    | - | GtoA | 0.1    | 0.1    | 3  | 2  | [10,10]   |
| chr15:50400936 | MYO5A    | coding_exon |                                                                          | - | TtoA | 0.1    | 0.1333 | 7  | 2  | [10,15]   |
| chr15:50400975 | MYO5A    | coding_exon |                                                                          | - | TtoC | 0.1    | 0.1333 | 3  | 2  | [10,15]   |
| chr6:76653370  | MYO6     | coding_exon | ENST00000369975:Etog;ENST00000369977:Etog;ENST00000369981:Etog;ENST00    | + | AtoG | 0.125  | 0.1333 | 2  | 2  | [15,16]   |
| chr6:76681515  | MYO6     | UTR3        |                                                                          | + | AtoG | 0.1111 | 0.125  | 4  | 2  | [16,18]   |
| chr6:76682191  | MYO6     | UTR3        |                                                                          | + | TtoA | 0.1    | 0.1538 | 3  | 3  | [10,13]   |
| chr6:76583956  | MYO6     | UTR5        |                                                                          | + | AtoG | 0.1    | 0.1    | 2  | 2  | [10,10]   |
| chr15:69906127 | MYO9A    | coding_exon | ENST00000356056:KtoE;ENST00000424560:KtoE;ENST00000444904:KtoE;ENST000   | - | AtoG | 0.1    | 0.1    | 2  | 2  | [10,10]   |
| chr15:69906135 | MYO9A    | coding_exon | ENST00000356056:Etog;ENST00000424560:Etog;ENST00000444904:Etog;ENST00    | - | AtoG | 0.1    | 0.1111 | 2  | 2  | [10,10]   |
| chr15:69903381 | MYO9A    | UTR3        |                                                                          | - | AtoG | 0.1    | 0.1    | 2  | 2  | [10,10]   |
| chr19:17174651 | MYO9B    | coding_exon | ENST00000319396:QtoK;ENST00000397274:QtoK;                               | + | CtoA | 0.1    | 0.1667 | 15 | 6  | [12,69]   |
| chr16:31046114 | MYST1    | coding_exon | ENST00000219797:LtoP;ENST00000448516:LtoP;                               | + | TtoC | 0.1053 | 0.1111 | 3  | 2  | [18,19]   |
| chr17:45250250 | MYST2    | coding_exon | ENST00000259021:YtoD;ENST00000424009:YtoD;ENST00000435742:YtoD;ENST00    | + | TtoG | 0.1111 | 0.1333 | 4  | 2  | [16,18]   |
| chr8:41907054  | MYST3    | UTR3        |                                                                          | - | TtoA | 0.15   | 0.2    | 3  | 2  | [15,20]   |
| chr10:76460236 | MYST4    | coding_exon | ENST00000287239:NtoT;ENST00000372711:NtoT;ENST00000372714:NtoT;ENST00    | + | AtoC | 0.1    | 0.1429 | 2  | 2  | [11,14]   |
| chr13:32010783 | N4BP2L2  | UTR5        |                                                                          | - | TtoG | 0.1    | 0.1    | 3  | 2  | [10,10]   |
| chr3:176471540 | NAALADL2 | coding_exon |                                                                          | + | TtoC | 0.2    | 0.4167 | 5  | 3  | [10,21]   |
| chr12:55394735 | NACA     | coding_exon | ENST00000356769:StoY;ENST00000393891:StoY;ENST00000435567:StoY;ENST000   | - | CtoA | 0.1    | 0.1    | 4  | 2  | [20,40]   |
| chr12:55394717 | NACA     | coding_exon | ENST00000356769:StoI;ENST00000393891:StoI;ENST00000435567:StoI;ENST00000 | - | GtoT | 0.1034 | 0.2    | 10 | 2  | [10,30]   |
| chr12:55404520 | NACA     | coding_exon | ENST00000356769:QtoR;ENST00000393891:QtoR;ENST00000435567:QtoR;ENST00    | - | AtoG | 0.125  | 0.1591 | 10 | 5  | [44,104]  |
| chr12:55404518 | NACA     | coding_exon | ENST00000356769:PtoT;ENST00000393891:PtoT;ENST00000435567:PtoT;ENST000   | - | CtoA | 0.1    | 0.2593 | 13 | 9  | [29,100]  |
| chr12:55404517 | NACA     | coding_exon | ENST00000356769:PtoL;ENST00000393891:PtoL;ENST00000435567:PtoL;ENST000   | - | CtoT | 0.1111 | 0.1538 | 9  | 9  | [29,40]   |
| chr12:55392946 | NACA     | coding_exon | ENST00000356769:GtoD;ENST00000393891:GtoD;ENST00000435567:GtoD;ENST00    | - | GtoA | 0.1212 | 0.16   | 9  | 2  | [50,66]   |
| chr12:55394726 | NACA     | coding_exon | ENST00000356769:Etov;ENST00000393891:Etov;ENST00000435567:Etov;ENST000   | - | AtoT | 0.1    | 0.125  | 10 | 2  | [16,21]   |
| chr12:55394727 | NACA     | coding_exon | ENST00000356769:Etog;ENST00000393891:Etog;ENST00000435567:Etog;ENST00    | - | GtoC | 0.1    | 0.1429 | 6  | 3  | [10,17]   |
| chr12:55392932 | NACA     | coding_exon | ENST00000356769:DtoN;ENST00000393891:DtoN;ENST00000435567:DtoN;ENST00    | - | GtoA | 0.1    | 0.1818 | 3  | 3  | [10,17]   |
| chr12:55392945 | NACA     | coding_exon |                                                                          | - | TtoC | 0.1    | 0.2841 | 11 | 6  | [56,223]  |
| chr12:55394731 | NACA     | coding_exon |                                                                          | - | AtoG | 0.1    | 0.125  | 9  | 2  | [10,16]   |
| chr12:55405013 | NACA     | UTR5        |                                                                          | - | GtoA | 0.1091 | 0.1429 | 5  | 2  | [35,55]   |
| chr4:166084397 | NACA3P   | coding_exon | ENST00000240349:Etog;                                                    | + | AtoG | 0.1818 | 0.2308 | 2  | 2  | [11,13]   |
| chr4:166084400 | NACA3P   | coding_exon | ENST00000240349:Etog;                                                    | + | AtoG | 0.1    | 0.1    | 3  | 2  | [10,10]   |
| chr4:166084407 | NACA3P   | coding_exon | ENST00000240349:DtoE;                                                    | + | TtoG | 0.1    | 0.1667 | 5  | 3  | [10,18]   |
| chr4:166084410 | NACA3P   | coding_exon |                                                                          | + | AtoG | 0.1579 | 0.3    | 4  | 2  | [10,20]   |
| chr1:1673692   | NADK     | UTR3        |                                                                          | - | TtoG | 0.1    | 0.1304 | 4  | 2  | [23,31]   |
| chr1:1674121   | NADK     | UTR3        |                                                                          | - | AtoC | 0.1111 | 0.1765 | 3  | 2  | [17,27]   |
| chr11:70870648 | NADSYN1  | coding_exon | ENST00000319023:VtoG;                                                    | + | TtoG | 0.1026 | 0.1212 | 7  | 2  | [33,39]   |
| chr11:70867162 | NADSYN1  | coding_exon | ENST00000319023:AtoE;                                                    | + | CtoA | 0.1053 | 0.1818 | 5  | 2  | [11,19]   |
| chr11:70890221 | NADSYN1  | UTR3        |                                                                          | + | TtoC | 0.1667 | 0.3    | 7  | 4  | [11,19]   |
| chr16:65414678 | NAE1     | coding_exon |                                                                          | - | AtoG | 0.1333 | 0.1765 | 3  | 2  | [15,17]   |
| chr22:40784506 | NAGA     | UTR3        |                                                                          | - | TtoA | 0.1    | 0.1    | 4  | 2  | [10,10]   |
| chr22:40784610 | NAGA     | UTR3        |                                                                          | - | AtoG | 0.1    | 0.1333 | 2  | 2  | [10,15]   |
| chr22:40784799 | NAGA     | UTR3        |                                                                          | - | TtoA | 0.1    | 0.1    | 2  | 2  | [10,10]   |
| chr17:37942949 | NAGLU    | coding_exon | ENST00000225927:YtoH;                                                    | + | TtoC | 0.1    | 0.125  | 4  | 2  | [10,16]   |
| chr17:37949481 | NAGLU    | coding_exon | ENST00000225927:YtoC;                                                    | + | AtoG | 0.1    | 0.1579 | 3  | 2  | [10,19]   |
| chr17:37949470 | NAGLU    | coding_exon | ENST00000225927:QtoH;                                                    | + | GtoC | 0.1    | 0.1667 | 3  | 2  | [10,12]   |
| chr17:37949472 | NAGLU    | coding_exon | ENST00000225927:NtoT;                                                    | + | AtoC | 0.1818 | 0.2    | 8  | 2  | [11,15]   |
| chr17:37949759 | NAGLU    | coding_exon | ENST00000225927:GtoS;                                                    | + | GtoA | 0.5    | 0.5833 | 2  | 2  | [12,13]   |
| chr9:99879083  | NAN5     | mixed       |                                                                          | + | TtoA | 0.1    | 0.1111 | 9  | 3  | [18,20]   |
| chr11:2953860  | NAP1L4   | coding_exon | ENST00000380542:VtoA;ENST00000399624:VtoA;                               | - | TtoC | 0.1231 | 0.2727 | 7  | 3  | [11,65]   |
| chr11:2956122  | NAP1L4   | coding_exon | ENST00000380542:StoF;ENST00000399624:StoF;                               | - | CtoT | 0.1064 | 0.2222 | 10 | 6  | [18,69]   |
| chr11:2936276  | NAP1L4   | coding_exon | ENST00000380542:RtoP;ENST00000399624:RtoP;                               | - | GtoC | 0.1562 | 0.4    | 6  | 2  | [10,32]   |
| chr11:2950006  | NAP1L4   | coding_exon | ENST00000380542:LtoI;ENST00000399624:LtoI;                               | - | CtoA | 0.1    | 0.25   | 7  | 3  | [10,30]   |
| chr11:2942533  | NAP1L4   | coding_exon | ENST00000380542:HtoY;ENST00000399624:HtoY;                               | - | CtoT | 0.1026 | 0.3667 | 10 | 7  | [18,81]   |
| chr11:2936285  | NAP1L4   | coding_exon | ENST00000380542:HtoR;ENST00000399624:HtoR;                               | - | AtoG | 0.1231 | 0.4    | 9  | 3  | [10,83]   |
| chr11:2957017  | NAP1L4   | coding_exon | ENST00000380542:HtoN;ENST00000399624:HtoN;                               | - | CtoA | 0.102  | 0.2778 | 9  | 7  | [30,49]   |
| chr11:2942510  | NAP1L4   | coding_exon |                                                                          | - | AtoG | 0.125  | 0.3077 | 11 | 5  | [13,46]   |
| chr19:55531609 | NAP5B    | mixed       |                                                                          | - | TtoC | 0.1    | 0.1333 | 3  | 2  | [10,15]   |
| chr19:55531647 | NAP5B    | mixed       |                                                                          | - | TtoC | 0.1    | 0.1333 | 2  | 2  | [10,16]   |
| chr19:55531648 | NAP5B    | mixed       |                                                                          | - | GtoT | 0.1    | 0.1429 | 3  | 2  | [14,21]   |
| chr19:55532095 | NAP5B    | mixed       |                                                                          | - | CtoG | 0.1    | 0.1176 | 5  | 2  | [17,20]   |
| chr17:78039231 | NARF     | coding_exon | ENST00000309794:Etog;ENST00000345415:Etog;ENST00000374611:Etog;ENST00    | + | AtoG | 0.1017 | 0.2857 | 6  | 4  | [21,59]   |
| chr4:140498137 | NARG1    | coding_exon | ENST00000296543:LtoP;ENST00000398947:LtoP;                               | + | TtoC | 0.1    | 0.1    | 2  | 2  | [10,10]   |
| chr4:140529240 | NARG1    | UTR3        |                                                                          | + | TtoC | 0.1    | 0.1538 | 3  | 2  | [13,20]   |

|                 |            |             |                                                                                                                                                                                               |   |      |        |        |    |    |         |
|-----------------|------------|-------------|-----------------------------------------------------------------------------------------------------------------------------------------------------------------------------------------------|---|------|--------|--------|----|----|---------|
| chr15:58502982  | NARG2      | UTR3        |                                                                                                                                                                                               | - | GtoT | 0.1    | 0.1    | 2  | 2  | [10,10] |
| chr18:53419835  | NARS       | UTR3        |                                                                                                                                                                                               | - | TtoG | 0.1538 | 0.1538 | 6  | 2  | [13,13] |
| chr11:77832361  | NARS2      | coding_exon | ENST00000281038:LtoS;                                                                                                                                                                         | - | TtoC | 0.1    | 0.1    | 4  | 2  | [10,10] |
| chr1:45856470   | NASP       | UTR3        |                                                                                                                                                                                               | + | TtoA | 0.1    | 0.1538 | 4  | 2  | [10,13] |
| chr11:34124992  | NAT10      | UTR3        |                                                                                                                                                                                               | + | GtoA | 0.1111 | 0.1304 | 6  | 2  | [18,23] |
| chr11:34124993  | NAT10      | UTR3        |                                                                                                                                                                                               | + | AtoG | 0.1    | 0.1429 | 6  | 2  | [10,21] |
| chr11:34124995  | NAT10      | UTR3        |                                                                                                                                                                                               | + | AtoC | 0.1    | 0.1333 | 4  | 2  | [10,15] |
| chr11:63476290  | NAT11      | coding_exon | ENST00000338447:NtoD;ENST0000037793:NtoD;                                                                                                                                                     | + | AtoG | 0.1    | 0.1333 | 2  | 2  | [10,15] |
| chr11:63469974  | NAT11      | coding_exon | ENST00000338447:LtoR;                                                                                                                                                                         | + | TtoG | 0.1    | 0.1    | 2  | 2  | [10,10] |
| chr3:114923452  | NAT13      | coding_exon | ENST00000240922:StoP;ENST00000477813:StoP;ENST00000493454:StoP;ENST00000360862:WtoR;ENST00000407558:WtoR;ENST00000414063:WtoR;ENST00000334982:FtoI;ENST00000398602:FtoI;                      | - | TtoC | 0.1061 | 0.1333 | 7  | 2  | [15,67] |
| chr16:3473588   | NAT15      | coding_exon | ENST00000360862:WtoR;ENST00000407558:WtoR;ENST00000414063:WtoR;ENST00000334982:FtoI;ENST00000398602:FtoI;                                                                                     | + | TtoC | 0.1    | 0.1    | 2  | 2  | [10,10] |
| chr16:3466226   | NAT15      | mixed       |                                                                                                                                                                                               | + | TtoA | 0.1    | 0.1176 | 2  | 2  | [10,18] |
| chr20:19961162  | NAT5       | coding_exon | ENST00000334982:FtoI;ENST00000398602:FtoI;                                                                                                                                                    | + | TtoA | 0.1    | 0.1053 | 2  | 2  | [20,38] |
| chr3:47015370   | NBEAL2     | mixed       |                                                                                                                                                                                               | + | TtoA | 0.1    | 0.1429 | 5  | 2  | [10,22] |
| chr8:91045867   | NBN        | coding_exon | ENST00000265433:VtoG;ENST00000409330:VtoG;                                                                                                                                                    | - | TtoG | 0.1053 | 0.1765 | 6  | 4  | [14,19] |
| chr8:91027572   | NBN        | coding_exon | ENST00000265433:QtoR;ENST00000409330:QtoR;                                                                                                                                                    | - | AtoG | 0.1    | 0.1429 | 2  | 2  | [10,14] |
| chr8:91062927   | NBN        | mixed       |                                                                                                                                                                                               | - | AtoG | 0.1364 | 0.1818 | 3  | 2  | [11,22] |
| chr8:91015741   | NBN        | UTR3        |                                                                                                                                                                                               | - | AtoG | 0.1    | 0.1053 | 2  | 2  | [10,19] |
| chr17:38596287  | NBR1       | coding_exon |                                                                                                                                                                                               | + | TtoC | 0.1    | 0.1053 | 5  | 3  | [10,19] |
| chr12:6505902   | NCAPD2     | coding_exon | ENST00000315579:Itot;ENST00000382457:Itot;                                                                                                                                                    | + | TtoC | 0.1    | 0.1667 | 2  | 2  | [10,12] |
| chr12:6493707   | NCAPD2     | coding_exon | ENST00000315579:CtoW;ENST00000382457:CtoW;                                                                                                                                                    | + | TtoG | 0.1111 | 0.1538 | 5  | 2  | [18,26] |
| chr12:6511339   | NCAPD2     | UTR3        |                                                                                                                                                                                               | + | AtoG | 0.1176 | 0.1333 | 2  | 2  | [15,17] |
| chr4:17451328   | NCAPG      | coding_exon | ENST00000251496:EtoG;                                                                                                                                                                         | + | AtoG | 0.1176 | 0.1579 | 7  | 4  | [17,27] |
| chr7:158137831  | NCAPG2     | coding_exon | ENST00000275830:LtoR;ENST00000356309:LtoR;ENST00000409339:LtoR;ENST00000275830:LtoR;ENST00000356309:LtoR;ENST00000409339:LtoR;ENST00000275830:LtoR;ENST00000356309:LtoR;ENST00000409339:LtoR; | - | TtoG | 0.1    | 0.1    | 3  | 2  | [10,10] |
| chr7:158117004  | NCAPG2     | UTR3        |                                                                                                                                                                                               | - | GtoA | 0.1111 | 0.1765 | 4  | 2  | [17,18] |
| chr2:96388597   | NCAPH      | coding_exon | ENST00000240423:StoR;ENST00000427946:StoR;ENST00000455200:StoR;                                                                                                                               | + | TtoA | 0.1    | 0.1111 | 2  | 2  | [10,18] |
| chr2:96389857   | NCAPH      | coding_exon | ENST00000240423:NtoD;ENST00000427946:NtoD;ENST00000455200:NtoD;                                                                                                                               | + | AtoG | 0.125  | 0.1538 | 5  | 2  | [13,16] |
| chr2:96403068   | NCAPH      | UTR3        |                                                                                                                                                                                               | + | TtoC | 0.1154 | 0.1429 | 7  | 2  | [14,26] |
| chr9:99458115   | NCBP1      | mixed       |                                                                                                                                                                                               | + | TtoC | 0.1    | 0.1    | 2  | 2  | [10,20] |
| chr9:99475716   | NCBP1      | UTR3        |                                                                                                                                                                                               | + | AtoG | 0.1    | 0.1    | 5  | 2  | [10,10] |
| chr3:198147132  | NCBP2      | UTR3        |                                                                                                                                                                                               | - | GtoA | 0.1    | 0.3    | 2  | 2  | [10,10] |
| chr22:35603941  | NCF4       | UTR3        |                                                                                                                                                                                               | + | TtoA | 0.1111 | 0.1579 | 5  | 2  | [10,20] |
| chr2:105876756  | NCK2       | UTR3        |                                                                                                                                                                                               | + | TtoC | 0.1    | 0.125  | 2  | 2  | [10,16] |
| chr2:105877116  | NCK2       | UTR3        |                                                                                                                                                                                               | + | TtoG | 0.1176 | 0.3571 | 4  | 3  | [14,17] |
| chr12:53223148  | NCKAP1L    | UTR3        |                                                                                                                                                                                               | + | TtoA | 0.1    | 0.2    | 3  | 2  | [11,20] |
| chr3:48691500   | NCKIPSD    | coding_exon | ENST00000294129:HtoP;ENST00000341520:HtoP;ENST00000416649:HtoP;                                                                                                                               | - | AtoC | 0.1    | 0.1111 | 2  | 2  | [18,20] |
| chr2:232027704  | NCL        | UTR3        |                                                                                                                                                                                               | - | GtoA | 0.125  | 0.3636 | 10 | 9  | [11,16] |
| chr2:232027801  | NCL        | UTR3        |                                                                                                                                                                                               | - | GtoT | 0.1    | 0.1111 | 3  | 2  | [10,18] |
| chr2:232037438  | NCL        | UTR5        |                                                                                                                                                                                               | - | GtoA | 0.1667 | 0.2308 | 3  | 2  | [12,13] |
| chr2:24783247   | NCOA1      | coding_exon |                                                                                                                                                                                               | + | TtoA | 0.1    | 0.1    | 2  | 2  | [10,10] |
| chr2:24845466   | NCOA1      | UTR3        |                                                                                                                                                                                               | + | TtoG | 0.1    | 0.1818 | 4  | 2  | [10,11] |
| chr2:24845484   | NCOA1      | UTR3        |                                                                                                                                                                                               | + | TtoA | 0.1    | 0.2308 | 7  | 3  | [10,17] |
| chr2:24845485   | NCOA1      | UTR3        |                                                                                                                                                                                               | + | TtoG | 0.1053 | 0.125  | 3  | 2  | [16,19] |
| chr2:24846729   | NCOA1      | UTR3        |                                                                                                                                                                                               | + | GtoA | 0.1    | 0.1    | 2  | 2  | [10,10] |
| chr8:71198714   | NCOA2      | coding_exon | ENST00000452400:StoP;                                                                                                                                                                         | - | TtoC | 0.125  | 0.1429 | 4  | 2  | [14,16] |
| chr20:45689747  | NCOA3      | coding_exon | ENST00000340189:QtoK;ENST00000341724:QtoK;ENST00000371997:QtoK;ENST00000340189:QtoK;ENST00000341724:QtoK;ENST00000371997:QtoK;                                                                | + | CtoA | 0.1    | 0.1875 | 3  | 2  | [16,20] |
| chr20:45689293  | NCOA3      | coding_exon |                                                                                                                                                                                               | + | AtoG | 0.1    | 0.1    | 2  | 2  | [10,10] |
| chr20:45716402  | NCOA3      | UTR3        |                                                                                                                                                                                               | + | TtoA | 0.1    | 0.1    | 2  | 2  | [10,10] |
| chr20:45716766  | NCOA3      | UTR3        |                                                                                                                                                                                               | + | TtoC | 0.1154 | 0.3077 | 13 | 6  | [11,26] |
| chr20:45716770  | NCOA3      | UTR3        |                                                                                                                                                                                               | + | TtoG | 0.1    | 0.2    | 5  | 2  | [10,10] |
| chr20:45717885  | NCOA3      | UTR3        |                                                                                                                                                                                               | + | TtoC | 0.1    | 0.1111 | 8  | 2  | [10,10] |
| chr20:32766815  | NCOA6      | coding_exon | ENST00000359003:VtoE;ENST00000374796:VtoE;                                                                                                                                                    | - | TtoA | 0.1    | 0.1    | 6  | 2  | [10,20] |
| chr20:32801085  | NCOA6      | coding_exon | ENST00000359003:StoR;ENST00000374796:StoR;                                                                                                                                                    | - | TtoA | 0.1    | 0.1818 | 2  | 2  | [10,11] |
| chr17:15892992  | NCOR1      | coding_exon | ENST00000268712:StoF;ENST00000395849:StoF;ENST00000395851:StoF;ENST00000268712:QtoK;ENST00000395848:QtoK;ENST00000395849:QtoK;ENST00000395851:QtoK;                                           | - | CtoT | 0.1    | 0.1    | 2  | 2  | [10,10] |
| chr17:15990584  | NCOR1      | coding_exon | ENST00000268712:QtoK;ENST00000395848:QtoK;ENST00000395849:QtoK;ENST00000395851:QtoK;                                                                                                          | - | CtoA | 0.1136 | 0.1176 | 5  | 2  | [17,45] |
| chr17:15924069  | NCOR1      | coding_exon |                                                                                                                                                                                               | - | TtoC | 0.1    | 0.1176 | 4  | 2  | [17,30] |
| chr17:15990540  | NCOR1      | coding_exon |                                                                                                                                                                                               | - | GtoA | 0.1111 | 0.1429 | 5  | 2  | [14,18] |
| chr17:15875797  | NCOR1      | UTR3        |                                                                                                                                                                                               | - | TtoA | 0.1    | 0.1818 | 2  | 2  | [10,11] |
| chr10:112648488 | NCRNA00081 | mixed       |                                                                                                                                                                                               | - | AtoT | 0.1    | 0.1905 | 4  | 2  | [10,21] |
| chr10:112650078 | NCRNA00081 | mixed       |                                                                                                                                                                                               | - | TtoC | 0.1    | 0.1667 | 4  | 3  | [10,19] |
| chr9:135881896  | NCRNA00094 | mixed       |                                                                                                                                                                                               | + | TtoC | 0.1    | 0.1    | 2  | 2  | [10,10] |
| chr9:135882749  | NCRNA00094 | mixed       |                                                                                                                                                                                               | + | AtoG | 0.1    | 0.125  | 2  | 2  | [10,16] |
| chr1:158595003  | NCSTN      | UTR3        |                                                                                                                                                                                               | + | TtoG | 0.1    | 0.1667 | 3  | 2  | [10,12] |
| chr6:90096147   | NCUBE1     | coding_exon |                                                                                                                                                                                               | - | AtoG | 0.1    | 0.125  | 4  | 3  | [16,25] |
| chr18:2567768   | NDC80      | coding_exon | ENST00000261597:NtoS;                                                                                                                                                                         | + | AtoG | 0.1    | 0.1176 | 6  | 2  | [17,20] |
| chr18:2569020   | NDC80      | coding_exon | ENST00000261597:CtoR;                                                                                                                                                                         | + | TtoC | 0.1    | 0.1    | 2  | 2  | [10,10] |
| chr13:79015715  | NDIFP2     | coding_exon | ENST00000218652:LtoP;ENST00000377116:LtoP;                                                                                                                                                    | + | TtoC | 0.1053 | 0.1429 | 6  | 3  | [14,19] |
| chr20:34713693  | NDRG3      | UTR3        |                                                                                                                                                                                               | - | TtoG | 0.1111 | 0.16   | 5  | 2  | [10,25] |
| chr5:149892704  | NDST1      | coding_exon | ENST00000261797:LtoR;ENST00000424060:LtoR;                                                                                                                                                    | + | TtoG | 0.1    | 0.1176 | 3  | 2  | [17,20] |
| chr5:149916914  | NDST1      | UTR3        |                                                                                                                                                                                               | + | GtoA | 0.1    | 0.1    | 3  | 2  | [10,10] |
| chr5:149917557  | NDST1      | UTR3        |                                                                                                                                                                                               | + | TtoC | 0.1    | 0.1053 | 4  | 2  | [10,19] |
| chr10:75236893  | NDST2      | coding_exon | ENST00000299641:StoP;ENST00000309979:StoP;ENST00000426473:StoP;                                                                                                                               | - | TtoC | 0.1    | 0.1    | 4  | 2  | [10,20] |
| chr10:75238065  | NDST2      | coding_exon | ENST00000299641:StoA;ENST00000309979:StoA;ENST00000426473:StoA;                                                                                                                               | - | TtoG | 0.1    | 0.1    | 2  | 2  | [10,10] |
| chr10:75234572  | NDST2      | coding_exon | ENST00000299641:LtoP;ENST00000309979:LtoP;                                                                                                                                                    | - | TtoC | 0.1    | 0.1333 | 3  | 2  | [10,15] |
| chr10:75237788  | NDST2      | coding_exon | ENST00000299641:GtoE;ENST00000309979:GtoE;ENST00000426473:GtoE;                                                                                                                               | - | GtoA | 0.1111 | 0.1111 | 2  | 2  | [18,18] |
| chr10:75232030  | NDST2      | UTR3        |                                                                                                                                                                                               | - | TtoG | 0.1    | 0.1429 | 2  | 2  | [10,14] |
| chr19:5845691   | NDUFA11    | mixed       |                                                                                                                                                                                               | - | TtoA | 0.1071 | 0.25   | 11 | 7  | [28,69] |
| chr19:19500007  | NDUFA13    | mixed       |                                                                                                                                                                                               | + | GtoA | 0.1    | 0.1765 | 11 | 7  | [10,71] |
| chr19:19500008  | NDUFA13    | mixed       |                                                                                                                                                                                               | + | CtoA | 0.8696 | 0.9259 | 4  | 4  | [24,55] |
| chr19:59302079  | NDUFA3     | mixed       |                                                                                                                                                                                               | + | AtoG | 0.1429 | 0.2121 | 5  | 2  | [14,33] |
| chr19:59302081  | NDUFA3     | mixed       |                                                                                                                                                                                               | + | CtoA | 0.2222 | 0.4167 | 4  | 4  | [10,19] |
| chr7:10939615   | NDUFA4     | UTR3        |                                                                                                                                                                                               | - | AtoG | 0.1    | 0.125  | 3  | 2  | [10,17] |
| chr22:40812064  | NDUFA6     | UTR3        |                                                                                                                                                                                               | - | AtoG | 0.1    | 0.2727 | 18 | 12 | [10,21] |
| chr22:40812066  | NDUFA6     | UTR3        |                                                                                                                                                                                               | - | TtoC | 0.1    | 0.2727 | 11 | 6  | [10,26] |
| chr15:39468012  | NDUFAF1    | coding_exon | ENST00000260361:ItotV;                                                                                                                                                                        | - | AtoG | 0.1    | 0.1    | 7  | 2  | [10,10] |
| chr15:39466994  | NDUFAF1    | coding_exon |                                                                                                                                                                                               | - | TtoA | 0.1053 | 0.1111 | 5  | 2  | [18,19] |
| chr3:49035703   | NDUFAF3    | UTR3        |                                                                                                                                                                                               | + | TtoA | 0.1    | 0.1    | 4  | 2  | [10,10] |
| chr3:49035721   | NDUFAF3    | UTR3        |                                                                                                                                                                                               | + | TtoC | 0.1538 | 0.3    | 4  | 4  | [10,16] |
| chr7:140052903  | NDUFB2     | mixed       |                                                                                                                                                                                               | + | TtoC | 0.1    | 0.2143 | 9  | 5  | [10,20] |
| chr3:121802685  | NDUFB4     | coding_exon | ENST00000184266:TtoK;ENST00000485064:TtoK;                                                                                                                                                    | + | CtoA | 0.12   | 0.125  | 3  | 2  | [24,25] |
| chr3:121802684  | NDUFB4     | coding_exon | ENST00000184266:TtoA;ENST00000485064:TtoA;                                                                                                                                                    | + | AtoG | 0.1667 | 0.2143 | 3  | 3  | [24,29] |
| chr3:121803836  | NDUFB4     | UTR3        |                                                                                                                                                                                               | + | TtoC | 0.1064 | 0.1364 | 6  | 2  | [47,66] |
| chr10:102273493 | NDUFB8     | UTR3        |                                                                                                                                                                                               | - | TtoC | 0.1333 | 0.1538 | 8  | 2  | [13,15] |
| chr8:125631397  | NDUFB9     | UTR3        |                                                                                                                                                                                               | + | TtoA | 0.1    | 0.1176 | 3  | 2  | [10,18] |
| chr8:125631401  | NDUFB9     | UTR3        |                                                                                                                                                                                               | + | CtoA | 0.2083 | 0.4615 | 3  | 3  | [10,24] |
| chr4:140430595  | NDUFC1     | UTR3        |                                                                                                                                                                                               | - | AtoG | 0.1    | 0.1538 | 8  | 2  | [13,31] |

|                 |          |             |                                                                                          |   |      |        |        |    |   |         |
|-----------------|----------|-------------|------------------------------------------------------------------------------------------|---|------|--------|--------|----|---|---------|
| chr11:77468303  | NDUFC2   | coding_exon | ENST00000281031:LtoV;ENST00000324742:LtoV;                                               | - | CtoG | 0.3654 | 0.3871 | 2  | 2 | [31,52] |
| chr1:39272658   | NDUFS5   | coding_exon | ENST00000372967:RtoP;ENST00000372969:RtoP;                                               | + | GtoC | 0.1053 | 0.1923 | 11 | 5 | [16,28] |
| chr1:39267183   | NDUFS5   | coding_exon | ENST00000372967:LtoS;ENST00000372969:LtoS;                                               | + | TtoC | 0.1    | 0.1    | 3  | 2 | [10,10] |
| chr1:39272866   | NDUFS5   | UTR3        |                                                                                          | + | TtoC | 0.1    | 0.2727 | 9  | 5 | [10,20] |
| chr1:39264594   | NDUFS5   | UTR5        |                                                                                          | + | TtoC | 0.1579 | 0.3333 | 4  | 3 | [12,19] |
| chr1:39264595   | NDUFS5   | UTR5        |                                                                                          | + | CtoT | 0.1818 | 0.2857 | 7  | 3 | [11,18] |
| chr11:67560687  | NDUFS8   | UTR3        |                                                                                          | + | AtoG | 0.2857 | 0.3    | 2  | 2 | [10,14] |
| chr11:67136575  | NDUFV1   | UTR3        |                                                                                          | + | AtoG | 0.1    | 0.2308 | 8  | 3 | [10,18] |
| chr11:67130987  | NDUFV1   | UTR5        |                                                                                          | + | CtoT | 0.1    | 0.1    | 3  | 2 | [10,10] |
| chr18:9124192   | NDUFV2   | coding_exon | ENST00000318388:RtoH;ENST00000400033:RtoH;                                               | + | GtoA | 0.1    | 0.2    | 5  | 3 | [10,20] |
| chr18:9124206   | NDUFV2   | coding_exon | ENST00000318388:PtoT;ENST00000400033:PtoT;                                               | + | CtoA | 0.1176 | 0.1538 | 3  | 2 | [13,17] |
| chr18:9114903   | NDUFV2   | coding_exon | ENST00000318388:KtoN;ENST00000400033:KtoN;                                               | + | AtoT | 0.1    | 0.1667 | 4  | 3 | [10,13] |
| chr18:9114901   | NDUFV2   | coding_exon | ENST00000318388:KtoE;ENST00000400033:KtoE;                                               | + | AtoG | 0.1176 | 0.25   | 4  | 4 | [13,17] |
| chr18:9114941   | NDUFV2   | coding_exon | ENST00000318388:CtoY;ENST00000400033:CtoY;                                               | + | GtoA | 0.1    | 0.1538 | 3  | 3 | [10,13] |
| chr18:9114949   | NDUFV2   | coding_exon | ENST00000318388:AtoT;ENST00000400033:AtoT;                                               | + | GtoA | 0.1667 | 0.5    | 4  | 3 | [10,12] |
| chr18:9114900   | NDUFV2   | coding_exon |                                                                                          | + | CtoT | 0.1    | 0.2667 | 3  | 3 | [10,15] |
| chr18:9124193   | NDUFV2   | coding_exon |                                                                                          | + | CtoG | 0.1429 | 0.1818 | 4  | 2 | [11,14] |
| chr18:9124324   | NDUFV2   | UTR3        |                                                                                          | + | TtoA | 0.1    | 0.2727 | 10 | 8 | [10,19] |
| chr8:92040160   | NECAP1   | UTR3        |                                                                                          | + | TtoG | 0.1    | 0.125  | 2  | 2 | [10,17] |
| chr12:8135634   | NECAP1   | coding_exon | ENST00000339754:RtoS;ENST00000450991:RtoS;                                               | + | CtoA | 0.1    | 0.1111 | 4  | 2 | [10,20] |
| chr1:16659118   | NECAP2   | UTR3        |                                                                                          | + | GtoA | 0.1    | 0.2727 | 7  | 3 | [10,14] |
| chr12:95862645  | NEDD1    | coding_exon | ENST00000266742:EtoG;ENST00000411739:EtoG;ENST00000429527:EtoG;ENST00000429527:EtoG;     | + | AtoG | 0.1    | 0.1333 | 2  | 2 | [10,15] |
| chr12:95854715  | NEDD1    | coding_exon |                                                                                          | + | TtoC | 0.1    | 0.1    | 2  | 2 | [10,20] |
| chr14:23755911  | NEDD8    | UTR3        |                                                                                          | - | CtoA | 0.1    | 0.3    | 2  | 2 | [10,10] |
| chr14:23771389  | NEDD8    | UTR5        |                                                                                          | - | TtoG | 0.1    | 0.1111 | 2  | 2 | [10,27] |
| chr6:11300613   | NEDD9    | coding_exon | ENST00000379446:VtoE;ENST00000448183:VtoE;                                               | - | TtoA | 0.1    | 0.1429 | 6  | 2 | [14,20] |
| chr6:11300611   | NEDD9    | coding_exon | ENST00000379446:GtoR;ENST00000448183:GtoR;                                               | - | GtoA | 0.1    | 0.1053 | 5  | 2 | [19,20] |
| chr6:11291791   | NEDD9    | UTR3        |                                                                                          | - | AtoG | 0.1    | 0.1538 | 2  | 2 | [10,13] |
| chr6:11292681   | NEDD9    | UTR3        |                                                                                          | - | TtoC | 0.1    | 0.1429 | 6  | 2 | [10,14] |
| chr6:11293112   | NEDD9    | UTR3        |                                                                                          | - | AtoG | 0.1    | 0.1    | 6  | 2 | [10,20] |
| chr8:11681179   | NEIL2    | coding_exon | ENST00000284503:Cto*;ENST00000354579:Cto*;ENST00000382309:Cto*;ENST00000382309:Cto*;     | + | CtoA | 0.1    | 0.1    | 2  | 2 | [10,10] |
| chr9:126154514  | NEK6     | UTR3        |                                                                                          | + | GtoA | 0.1053 | 0.1667 | 5  | 4 | [12,19] |
| chr9:126154674  | NEK6     | UTR3        |                                                                                          | + | TtoC | 0.1    | 0.1111 | 2  | 2 | [10,20] |
| chr1:196488909  | NEK7     | coding_exon |                                                                                          | + | AtoC | 0.1    | 0.1    | 2  | 2 | [10,10] |
| chr1:196555524  | NEK7     | UTR3        |                                                                                          | + | TtoA | 0.1    | 0.1    | 4  | 2 | [10,11] |
| chr1:196556655  | NEK7     | UTR3        |                                                                                          | + | AtoG | 0.1    | 0.1    | 2  | 2 | [10,10] |
| chr17:24092101  | NEK8     | coding_exon | ENST00000268766:LtoP;                                                                    | + | TtoC | 0.1    | 0.1053 | 3  | 2 | [19,20] |
| chr14:74640406  | NEK9     | coding_exon | ENST00000238616:CtoW;                                                                    | - | TtoG | 0.1111 | 0.1875 | 7  | 3 | [16,20] |
| chr9:139462501  | NELF     | UTR3        |                                                                                          | - | CtoA | 0.1    | 0.1    | 2  | 2 | [10,10] |
| chr9:139462506  | NELF     | UTR3        |                                                                                          | - | TtoC | 0.1    | 0.1111 | 7  | 3 | [10,99] |
| chr9:139462825  | NELF     | UTR3        |                                                                                          | - | CtoG | 0.1    | 0.1429 | 2  | 2 | [10,15] |
| chr1:210686099  | NENF     | UTR3        |                                                                                          | + | TtoC | 0.1053 | 0.3529 | 13 | 6 | [11,19] |
| chr1:210686103  | NENF     | UTR3        |                                                                                          | + | AtoG | 0.1538 | 0.1667 | 2  | 2 | [13,13] |
| chr1:210686196  | NENF     | UTR3        |                                                                                          | + | CtoG | 0.1667 | 0.1667 | 2  | 2 | [12,12] |
| chr10:5490066   | NET1     | UTR3        |                                                                                          | + | AtoG | 0.1    | 0.1    | 3  | 2 | [10,10] |
| chr16:45714283  | NETO2    | coding_exon | ENST00000303155:PtoA;                                                                    | - | CtoG | 0.1    | 0.1818 | 4  | 2 | [10,11] |
| chr16:45675026  | NETO2    | coding_exon |                                                                                          | - | TtoC | 0.1    | 0.1    | 2  | 2 | [10,20] |
| chr6:31935012   | NEU1     | UTR3        |                                                                                          | - | TtoA | 0.1    | 0.1667 | 6  | 3 | [10,12] |
| chr17:7168952   | NEURL4   | coding_exon | ENST00000315614:VtoA;ENST00000399464:VtoA;                                               | - | TtoC | 0.15   | 0.1818 | 3  | 2 | [11,20] |
| chr17:7162184   | NEURL4   | coding_exon |                                                                                          | - | AtoC | 0.1    | 0.3846 | 6  | 3 | [10,20] |
| chr17:26656122  | NF1      | mixed       |                                                                                          | + | AtoG | 0.1    | 0.1    | 2  | 2 | [10,10] |
| chr17:26727939  | NF1      | mixed       |                                                                                          | + | TtoA | 0.1    | 0.1538 | 3  | 2 | [10,13] |
| chr18:75322299  | NFATC1   | coding_exon | ENST00000329101:DtoG;ENST00000397794:DtoG;                                               | + | AtoG | 0.1    | 0.1111 | 2  | 2 | [18,20] |
| chr20:49482042  | NFATC2   | coding_exon |                                                                                          | - | GtoA | 0.1    | 0.1    | 3  | 2 | [10,10] |
| chr20:49438248  | NFATC2   | UTR3        |                                                                                          | - | TtoC | 0.1    | 0.1333 | 3  | 2 | [10,15] |
| chr16:28874860  | NFATC2IP | mixed       |                                                                                          | + | TtoC | 0.15   | 0.2308 | 14 | 2 | [13,20] |
| chr16:66758273  | NFATC3   | coding_exon | ENST00000329524:LtoP;ENST00000346183:LtoP;ENST00000379165:LtoP;                          | + | TtoC | 0.1    | 0.1    | 2  | 2 | [10,10] |
| chr16:66714156  | NFATC3   | coding_exon | ENST00000329524:HtoR;ENST00000346183:HtoR;ENST00000379165:HtoR;                          | + | AtoG | 0.1    | 0.25   | 2  | 2 | [10,12] |
| chr16:66782665  | NFATC3   | coding_exon | ENST00000329524:HtoQ;ENST00000346183:HtoQ;ENST00000379165:HtoQ;                          | + | TtoG | 0.1    | 0.1    | 2  | 2 | [10,10] |
| chr16:66782530  | NFATC3   | coding_exon |                                                                                          | + | TtoC | 0.1    | 0.1    | 3  | 2 | [10,10] |
| chr17:43483076  | NFE2L1   | UTR5        |                                                                                          | + | AtoG | 0.1    | 0.2    | 4  | 4 | [10,21] |
| chr17:43483414  | NFE2L1   | UTR5        |                                                                                          | + | TtoC | 0.1053 | 0.1667 | 5  | 2 | [13,19] |
| chr2:177803907  | NFE2L2   | coding_exon | ENST00000397062:LtoP;ENST00000397063:LtoP;ENST00000446151:LtoP;                          | - | TtoC | 0.1333 | 0.15   | 3  | 2 | [15,20] |
| chr4:103733684  | NFKB1    | mixed       |                                                                                          | + | TtoG | 0.119  | 0.1636 | 3  | 2 | [42,55] |
| chr6:31634574   | NFKB1L1  | UTR3        |                                                                                          | + | TtoC | 0.1    | 0.1579 | 5  | 3 | [10,27] |
| chr3:103054300  | NFKBIZ   | coding_exon | ENST00000326151:RtoT;ENST00000326172:RtoT;ENST00000394054:RtoT;                          | + | GtoC | 0.1    | 0.2    | 4  | 2 | [10,10] |
| chr3:103057382  | NFKBIZ   | coding_exon |                                                                                          | + | TtoC | 0.1    | 0.1    | 2  | 2 | [10,10] |
| chr11:129245309 | NFRKB    | coding_exon | ENST00000304521:TtoP;ENST00000446488:TtoP;                                               | - | AtoC | 0.1053 | 0.1333 | 2  | 2 | [15,19] |
| chr11:129239467 | NFRKB    | UTR3        |                                                                                          | - | TtoA | 0.1    | 0.1    | 2  | 2 | [10,10] |
| chr9:33284896   | NFX1     | mixed       |                                                                                          | + | CtoA | 0.1053 | 0.25   | 9  | 6 | [12,38] |
| chr9:33322498   | NFX1     | mixed       |                                                                                          | + | AtoC | 0.1    | 0.1304 | 7  | 4 | [10,23] |
| chr9:33361117   | NFX1     | UTR3        |                                                                                          | + | AtoG | 0.1111 | 0.1538 | 6  | 3 | [13,19] |
| chr12:103038350 | NFYB     | coding_exon |                                                                                          | - | TtoC | 0.125  | 0.2381 | 4  | 3 | [17,21] |
| chr12:103037560 | NFYB     | UTR3        |                                                                                          | - | GtoA | 0.1    | 0.125  | 4  | 2 | [10,16] |
| chr15:88610327  | NGRN     | mixed       |                                                                                          | + | TtoC | 0.1    | 0.15   | 3  | 2 | [10,20] |
| chr4:104190889  | NHEDC2   | coding_exon | ENST00000339611:LtoP;ENST00000362026:LtoP;ENST00000394785:LtoP;                          | - | TtoC | 0.1    | 0.1    | 3  | 2 | [10,10] |
| chr4:104187749  | NHEDC2   | coding_exon | ENST00000339611:GtoD;ENST00000362026:GtoD;ENST00000394785:GtoD;                          | - | GtoA | 0.1    | 0.1    | 2  | 2 | [10,10] |
| chr4:104187832  | NHEDC2   | coding_exon |                                                                                          | - | TtoG | 0.1    | 0.1111 | 4  | 2 | [10,10] |
| chr4:104198576  | NHEDC2   | coding_exon |                                                                                          | - | TtoC | 0.125  | 0.3333 | 3  | 2 | [12,16] |
| chr2:219648987  | NHEJ1    | UTR3        |                                                                                          | - | TtoA | 0.1    | 0.1    | 2  | 2 | [10,10] |
| chr2:219649139  | NHEJ1    | UTR3        |                                                                                          | - | TtoA | 0.1    | 0.1    | 5  | 2 | [10,10] |
| chr22:40399915  | NHP2L1   | UTR3        |                                                                                          | - | GtoT | 0.1    | 0.1818 | 3  | 2 | [10,11] |
| chr22:40399918  | NHP2L1   | UTR3        |                                                                                          | - | TtoA | 0.1    | 0.1667 | 4  | 3 | [10,13] |
| chr22:40400749  | NHP2L1   | UTR3        |                                                                                          | - | TtoA | 0.1053 | 0.25   | 3  | 2 | [12,19] |
| chr22:40400756  | NHP2L1   | UTR3        |                                                                                          | - | TtoA | 0.1154 | 0.3    | 15 | 6 | [10,26] |
| chr1:234206350  | NID1     | UTR3        |                                                                                          | - | TtoG | 0.1    | 0.1111 | 3  | 2 | [10,11] |
| chr2:201470168  | NIF3L1   | coding_exon | ENST00000359683:VtoA;ENST00000403702:VtoA;ENST00000409020:VtoA;ENST00000359683:VtoA;     | + | TtoC | 0.1053 | 0.1538 | 3  | 2 | [14,19] |
| chr2:201468258  | NIF3L1   | coding_exon | ENST00000358515:IttoN;ENST00000359683:IttoN;ENST00000374679:IttoN;ENST00000374679:IttoN; | + | TtoA | 0.1    | 0.1333 | 5  | 2 | [10,15] |
| chr14:50280799  | NIN      | coding_exon | ENST00000245441:QtoR;ENST00000311149:QtoR;ENST00000324292:QtoR;ENST00000324292:QtoR;     | - | AtoG | 0.1053 | 0.1333 | 3  | 2 | [15,19] |
| chr14:50291308  | NIN      | coding_exon |                                                                                          | - | AtoG | 0.125  | 0.1818 | 3  | 2 | [11,16] |
| chr14:50256569  | NIN      | UTR3        |                                                                                          | - | AtoG | 0.1    | 0.1176 | 3  | 2 | [10,17] |
| chr14:50257146  | NIN      | UTR3        |                                                                                          | - | AtoG | 0.1    | 0.16   | 4  | 2 | [10,25] |
| chr14:50257539  | NIN      | UTR3        |                                                                                          | - | AtoG | 0.1    | 0.2727 | 2  | 2 | [11,11] |
| chr14:50258644  | NIN      | UTR3        |                                                                                          | - | TtoC | 0.1    | 0.2    | 4  | 3 | [12,20] |
| chr12:622937    | NINJ2    | coding_exon |                                                                                          | - | GtoC | 0.1    | 0.1667 | 3  | 3 | [10,16] |
| chr15:20557777  | NIP2A    | coding_exon | ENST00000337451:NtoS;ENST00000359727:NtoS;ENST00000398013:NtoS;ENST00000398013:NtoS;     | - | AtoG | 0.1111 | 0.125  | 3  | 2 | [16,18] |

|                 |           |             |                                                                         |   |      |        |        |    |    |           |
|-----------------|-----------|-------------|-------------------------------------------------------------------------|---|------|--------|--------|----|----|-----------|
| chr15:20563876  | NIPA2     | coding_exon | ENST00000337451:Itov;ENST00000359727:Itov;ENST00000398013:Itov;ENST0000 | - | AtaG | 0.1818 | 0.1923 | 7  | 4  | [11,26]   |
| chr15:20557950  | NIPA2     | coding_exon |                                                                         | - | TtoA | 0.1    | 0.1176 | 2  | 2  | [10,17]   |
| chr15:20565926  | NIPA2     | coding_exon |                                                                         | - | AtaC | 0.1633 | 0.1892 | 4  | 2  | [37,49]   |
| chr1:24671905   | NIPAL3    | UTR3        |                                                                         | + | TtoC | 0.1    | 0.1    | 3  | 2  | [10,10]   |
| chr3:52501435   | NISCH     | coding_exon | ENST00000345716:VtoG;ENST00000433196:VtoG;ENST00000479054:VtoG;         | + | TtoG | 0.1176 | 0.3    | 5  | 2  | [10,17]   |
| chr3:52481015   | NISCH     | mixed       |                                                                         | + | TtoC | 0.1176 | 0.2143 | 3  | 2  | [14,17]   |
| chr3:52490878   | NISCH     | mixed       |                                                                         | + | GtoC | 0.1    | 0.1    | 2  | 2  | [10,10]   |
| chr1:159357027  | NIT1      | coding_exon | ENST00000368007:WtoR;ENST00000368009:WtoR;                              | + | TtoC | 0.1053 | 0.125  | 5  | 2  | [19,24]   |
| chr3:42636164   | NKTR      | coding_exon | ENST00000232978:NtoK;ENST00000442970:NtoK;                              | + | TtoA | 0.1    | 0.1    | 2  | 2  | [10,10]   |
| chr17:30483533  | NLE1      | UTR3        |                                                                         | - | TtoC | 0.1071 | 0.1875 | 2  | 2  | [16,28]   |
| chr17:23543339  | NLK       | coding_exon | ENST00000262393:QtoR;ENST0000047008:QtoR;                               | + | AtaG | 0.1    | 0.1818 | 2  | 2  | [10,12]   |
| chr16:55619717  | NLRC5     | coding_exon | ENST00000262510:Lto*;ENST00000308149:Lto*;ENST00000436936:Lto*;         | + | TtoG | 0.1    | 0.1875 | 5  | 4  | [16,29]   |
| chr16:55580997  | NLRC5     | UTR5        |                                                                         | + | CtoG | 0.3571 | 0.4615 | 2  | 2  | [13,14]   |
| chr16:55581002  | NLRC5     | UTR5        |                                                                         | + | GtoT | 0.3182 | 0.4667 | 2  | 2  | [15,22]   |
| chr11:118559492 | NLRX1     | mixed       |                                                                         | + | CtoG | 0.1    | 0.1    | 2  | 2  | [10,10]   |
| chr11:118559743 | NLRX1     | mixed       |                                                                         | + | TtoC | 0.1    | 0.1667 | 2  | 2  | [10,12]   |
| chr3:162452493  | NMDD3     | mixed       |                                                                         | + | TtoA | 0.1667 | 0.1667 | 2  | 2  | [12,12]   |
| chr17:46594388  | NME1-NME2 | coding_exon |                                                                         | + | TtoC | 0.1    | 0.2963 | 21 | 16 | [18,90]   |
| chr17:46603929  | NME2      | coding_exon | ENST00000393185:YtoH;ENST00000393190:YtoH;ENST00000393191:YtoH;ENST00   | + | TtoC | 0.1333 | 0.4    | 3  | 2  | [11,16]   |
| chr17:46603950  | NME2      | coding_exon | ENST00000393185:WtoR;ENST00000393190:WtoR;ENST00000393191:WtoR;ENST     | + | TtoC | 0.1    | 0.1818 | 3  | 2  | [11,11]   |
| chr17:46603864  | NME2      | coding_exon | ENST00000393185:StoN;ENST00000393190:StoN;ENST00000393191:StoN;ENST00   | + | GtoA | 0.1176 | 0.125  | 2  | 2  | [16,18]   |
| chr17:46602409  | NME2      | coding_exon | ENST00000393185:RtoK;ENST00000393190:RtoK;ENST00000393191:RtoK;ENST00   | + | GtoA | 0.1429 | 0.1613 | 8  | 3  | [20,31]   |
| chr17:46602330  | NME2      | coding_exon | ENST00000393185:RtoG;ENST00000393190:RtoG;ENST00000393191:RtoG;ENST00   | + | CtoG | 0.1013 | 0.1111 | 11 | 2  | [74,79]   |
| chr17:46602408  | NME2      | coding_exon | ENST00000393185:RtoG;ENST00000393190:RtoG;ENST00000393191:RtoG;ENST00   | + | AtaG | 0.1    | 0.1379 | 10 | 2  | [30,50]   |
| chr17:46603858  | NME2      | coding_exon | ENST00000393185:HtoR;ENST00000393190:HtoR;ENST00000393191:HtoR;ENST00   | + | AtaG | 0.1429 | 0.2727 | 3  | 2  | [12,14]   |
| chr17:46603860  | NME2      | coding_exon | ENST00000393185:GtoS;ENST00000393190:GtoS;ENST00000393191:GtoS;ENST00   | + | GtoA | 0.1111 | 0.3    | 2  | 2  | [10,11]   |
| chr17:46603940  | NME2      | coding_exon | ENST00000393185:Cto*;ENST00000393190:Cto*;ENST00000393191:Cto*;ENST00   | + | TtoA | 0.1    | 0.1667 | 3  | 2  | [10,13]   |
| chr17:46603942  | NME2      | coding_exon | ENST00000393185:AtaD;ENST00000393190:AtaD;ENST00000393191:AtaD;ENST00   | + | CtoA | 0.1    | 0.1333 | 2  | 2  | [10,15]   |
| chr17:46603847  | NME2      | coding_exon |                                                                         | + | GtoA | 0.1    | 0.2759 | 13 | 8  | [15,72]   |
| chr17:46603919  | NME2      | coding_exon |                                                                         | + | AtaG | 0.1    | 0.25   | 5  | 3  | [10,15]   |
| chr17:46604046  | NME2      | UTR3        |                                                                         | + | AtaG | 0.1005 | 0.1015 | 17 | 2  | [191,199] |
| chr17:46604104  | NME2      | UTR3        |                                                                         | + | AtaG | 0.1266 | 0.1333 | 11 | 3  | [46,80]   |
| chr17:46604105  | NME2      | UTR3        |                                                                         | + | CtoA | 0.8929 | 1      | 7  | 7  | [19,65]   |
| chr3:48311007   | NME6      | UTR3        |                                                                         | - | TtoC | 0.1    | 0.1111 | 3  | 2  | [10,10]   |
| chr1:167368583  | NME7      | UTR3        |                                                                         | - | AtaT | 0.1    | 0.1111 | 2  | 2  | [10,18]   |
| chr2:151835413  | NMI       | UTR3        |                                                                         | - | AtaG | 0.1111 | 0.2727 | 7  | 3  | [10,11]   |
| chr1:9965342    | NMNAT1    | coding_exon | ENST00000377205:TtoR;                                                   | + | CtoG | 0.1    | 0.1    | 2  | 2  | [10,10]   |
| chr17:40540826  | NMT1      | UTR3        |                                                                         | + | TtoG | 0.1053 | 0.1071 | 3  | 2  | [19,28]   |
| chr17:40541026  | NMT1      | UTR3        |                                                                         | + | GtoC | 0.2963 | 1      | 3  | 3  | [21,27]   |
| chr17:40541830  | NMT1      | UTR3        |                                                                         | + | TtoC | 0.12   | 0.1212 | 4  | 2  | [25,33]   |
| chr10:15223471  | NMT2      | mixed       |                                                                         | - | TtoC | 0.1    | 0.1818 | 2  | 2  | [10,11]   |
| chr5:43648945   | NNT       | coding_exon |                                                                         | + | TtoG | 0.1    | 0.3125 | 8  | 4  | [10,21]   |
| chr5:43680052   | NNT       | coding_exon |                                                                         | + | TtoA | 0.1    | 0.1818 | 3  | 2  | [10,11]   |
| chr5:43740530   | NNT       | UTR3        |                                                                         | + | AtaC | 0.1    | 0.1111 | 2  | 2  | [10,27]   |
| chr5:43740639   | NNT       | UTR3        |                                                                         | + | TtoA | 0.1    | 0.1    | 2  | 2  | [10,10]   |
| chr5:43741104   | NNT       | UTR3        |                                                                         | + | AtaG | 0.1111 | 0.125  | 7  | 2  | [16,18]   |
| chr10:96084389  | NOC3L     | coding_exon | ENST00000371350:KtoE;ENST00000371361:KtoE;                              | - | AtaG | 0.125  | 0.15   | 8  | 2  | [16,20]   |
| chr10:96087574  | NOC3L     | coding_exon |                                                                         | - | TtoC | 0.1    | 0.1364 | 5  | 3  | [10,23]   |
| chr10:96083906  | NOC3L     | UTR3        |                                                                         | - | TtoC | 0.1    | 0.1    | 2  | 2  | [10,10]   |
| chr7:30439275   | NOD1      | coding_exon |                                                                         | - | AtaT | 0.1    | 0.1    | 2  | 2  | [10,10]   |
| chr16:49303343  | NOD2      | coding_exon | ENST00000300589:TtoP;                                                   | + | AtaC | 0.1    | 0.1    | 2  | 2  | [10,10]   |
| chr16:49324170  | NOD2      | UTR3        |                                                                         | + | AtaG | 0.1    | 0.1667 | 2  | 2  | [10,12]   |
| chr16:49324225  | NOD2      | UTR3        |                                                                         | + | TtoA | 0.1    | 0.1    | 2  | 2  | [10,10]   |
| chr22:36414910  | NOL12     | coding_exon | ENST00000359114:StoP;                                                   | + | TtoC | 0.1176 | 0.2    | 3  | 2  | [10,17]   |
| chr16:65766648  | NOL3      | UTR3        |                                                                         | + | TtoC | 0.1429 | 0.1818 | 3  | 2  | [11,14]   |
| chr9:33452621   | NOL6      | mixed       |                                                                         | - | TtoC | 0.1    | 0.1176 | 2  | 2  | [10,17]   |
| chr9:33451626   | NOL6      | UTR3        |                                                                         | - | AtaG | 0.1053 | 0.1905 | 9  | 4  | [16,21]   |
| chr9:33451630   | NOL6      | UTR3        |                                                                         | - | TtoC | 0.1    | 0.2    | 7  | 2  | [10,10]   |
| chr6:13728970   | NOL7      | coding_exon | ENST00000451315:QtoK;                                                   | + | CtoA | 0.1176 | 0.2308 | 7  | 2  | [13,17]   |
| chr6:13728528   | NOL7      | coding_exon | ENST00000451315:NtoD;                                                   | + | AtaG | 0.1    | 0.1    | 2  | 2  | [10,10]   |
| chr6:13729988   | NOL7      | mixed       |                                                                         | + | AtaG | 0.1    | 0.129  | 7  | 2  | [10,34]   |
| chr6:13730111   | NOL7      | mixed       |                                                                         | + | TtoC | 0.1    | 0.2143 | 7  | 3  | [10,14]   |
| chr6:13729148   | NOL7      | UTR3        |                                                                         | + | AtaT | 0.1    | 0.1    | 2  | 2  | [10,10]   |
| chr9:94109124   | NOL8      | coding_exon | ENST00000358855:VtoA;ENST00000360868:VtoA;ENST00000375594:VtoA;ENST00   | - | TtoC | 0.1    | 0.1212 | 3  | 2  | [10,33]   |
| chr1:6508497    | NOL9      | UTR3        |                                                                         | - | TtoC | 0.1    | 0.15   | 4  | 2  | [20,20]   |
| chr10:103909297 | NOLC1     | coding_exon | ENST00000370007:PtoT;ENST00000405356:PtoT;ENST00000429062:PtoT;         | + | CtoA | 0.1111 | 0.1667 | 8  | 2  | [30,36]   |
| chr7:156449363  | NOM1      | coding_exon | ENST00000275820:StoG;                                                   | + | AtaG | 0.1111 | 0.2308 | 7  | 5  | [10,18]   |
| chr7:156445439  | NOM1      | coding_exon | ENST00000275820:LtoP;                                                   | + | TtoC | 0.1    | 0.2    | 2  | 2  | [10,10]   |
| chr7:156455078  | NOM1      | coding_exon | ENST00000275820:AtaT;                                                   | + | GtoA | 0.1    | 0.1818 | 3  | 2  | [10,11]   |
| chr7:156449362  | NOM1      | coding_exon |                                                                         | + | CtoA | 0.1176 | 0.2143 | 6  | 4  | [14,17]   |
| chr5:175743705  | NOP16     | coding_exon | ENST00000341213:HtoQ;ENST00000451293:HtoQ;                              | - | CtoA | 0.3462 | 0.5    | 4  | 4  | [10,26]   |
| chr5:175743702  | NOP16     | coding_exon | ENST00000341213:HtoP;ENST00000451293:HtoP;                              | - | AtaC | 0.1538 | 0.25   | 3  | 2  | [12,13]   |
| chr5:175743706  | NOP16     | coding_exon | ENST00000341213:HtoP;ENST00000451293:HtoP;                              | - | AtaC | 0.3462 | 0.5    | 3  | 3  | [10,26]   |
| chr5:175743703  | NOP16     | coding_exon | ENST00000341213:HtoN;ENST00000451293:HtoN;                              | - | CtoA | 0.1333 | 0.3333 | 6  | 5  | [10,18]   |
| chr12:6536312   | NOP2      | mixed       |                                                                         | - | AtaG | 0.1053 | 0.2    | 5  | 2  | [15,19]   |
| chr20:2586685   | NOP56     | coding_exon | ENST00000329276:KtoN;                                                   | + | AtaC | 0.1667 | 0.1818 | 2  | 2  | [11,12]   |
| chr2:202857446  | NOP58     | coding_exon | ENST00000264279:HtoP;                                                   | + | AtaC | 0.1053 | 0.3077 | 5  | 5  | [13,25]   |
| chr19:54750786  | NOSIP     | UTR3        |                                                                         | - | TtoC | 0.1    | 0.1111 | 4  | 2  | [18,20]   |
| chr9:138509118  | NOTCH1    | UTR3        |                                                                         | - | TtoC | 0.1    | 0.1    | 3  | 2  | [10,11]   |
| chr11:107538114 | NPAT      | coding_exon | ENST00000278612:KtoR;                                                   | - | AtaG | 0.1    | 0.1    | 2  | 2  | [10,10]   |
| chr18:19366129  | NPC1      | UTR3        |                                                                         | - | AtaG | 0.1    | 0.1    | 3  | 2  | [10,10]   |
| chr20:56721883  | NPEPL1    | coding_exon | ENST00000371131:DtoN;                                                   | + | GtoA | 0.1176 | 0.2143 | 6  | 4  | [14,17]   |
| chr20:56721884  | NPEPL1    | coding_exon | ENST00000356091:TtoP;ENST00000371131:DtoA;                              | + | AtaC | 0.125  | 0.1333 | 3  | 2  | [15,16]   |
| chr20:56721999  | NPEPL1    | coding_exon | ENST00000356091:GtoE;                                                   | + | CtoA | 0.1    | 0.1    | 2  | 2  | [10,10]   |
| chr20:56723986  | NPEPL1    | UTR3        |                                                                         | + | TtoC | 0.1053 | 0.1333 | 5  | 2  | [15,19]   |
| chr17:43046067  | NPEPPS    | coding_exon | ENST00000322157:TtoA;                                                   | + | AtaG | 0.1    | 0.2143 | 4  | 2  | [14,20]   |
| chr17:43054476  | NPEPPS    | UTR3        |                                                                         | + | AtaG | 0.1    | 0.125  | 2  | 2  | [10,16]   |
| chr17:43055387  | NPEPPS    | UTR3        |                                                                         | + | AtaC | 0.1    | 0.2308 | 6  | 3  | [13,21]   |
| chr3:133759900  | NPHP3     | UTR3        |                                                                         | - | AtaG | 0.1    | 0.1154 | 7  | 2  | [10,26]   |
| chr3:133760494  | NPHP3     | UTR3        |                                                                         | - | AtaC | 0.1    | 0.1    | 2  | 2  | [10,10]   |
| chr3:133760513  | NPHP3     | UTR3        |                                                                         | - | AtaG | 0.1    | 0.1053 | 3  | 2  | [10,19]   |
| chr3:133804775  | NPHP3     | UTR3        |                                                                         | - | TtoA | 0.1    | 0.125  | 2  | 2  | [10,16]   |
| chr5:170751007  | NPM1      | coding_exon | ENST00000296930:TtoA;ENST00000351986:TtoA;ENST00000393820:TtoA;         | + | AtaG | 0.12   | 0.2963 | 9  | 4  | [25,52]   |
| chr5:170747595  | NPM1      | coding_exon | ENST00000296930:RtoM;ENST00000351986:RtoM;ENST00000393820:RtoM;         | + | GtoT | 0.1034 | 0.1379 | 7  | 2  | [29,30]   |
| chr5:170770160  | NPM1      | coding_exon | ENST00000296930:RtoG;ENST00000351986:RtoG;                              | + | AtaG | 0.1    | 0.25   | 8  | 5  | [10,19]   |
| chr5:170751378  | NPM1      | coding_exon | ENST00000296930:PtoT;ENST00000351986:PtoT;ENST00000393820:PtoT;         | + | CtoA | 0.1212 | 0.1923 | 8  | 3  | [28,90]   |

|                 |         |             |                                                                                      |   |      |        |        |    |    |           |
|-----------------|---------|-------------|--------------------------------------------------------------------------------------|---|------|--------|--------|----|----|-----------|
| chr5:170751345  | NPM1    | coding_exon | ENST00000296930:PtoS;ENST00000351986:PtoS;ENST00000393820:PtoS;                      | + | CtoT | 0.1154 | 0.1207 | 2  | 2  | [52,60]   |
| chr5:170747598  | NPM1    | coding_exon | ENST00000296930:PtoR;ENST00000351986:PtoR;ENST00000393820:PtoR;                      | + | CtoG | 0.1    | 0.1176 | 6  | 2  | [10,18]   |
| chr5:170747592  | NPM1    | coding_exon | ENST00000296930:LtoQ;ENST00000351986:LtoQ;ENST00000393820:LtoQ;                      | + | TtoA | 0.1136 | 0.28   | 7  | 5  | [18,48]   |
| chr5:170751002  | NPM1    | coding_exon | ENST00000296930:LtoP;ENST00000351986:LtoP;ENST00000393820:LtoP;                      | + | TtoC | 0.1408 | 0.28   | 14 | 13 | [50,210]  |
| chr5:170770139  | NPM1    | coding_exon | ENST00000296930:ItoV;ENST00000351986:ItoV;                                           | + | AtoG | 0.25   | 0.25   | 7  | 2  | [12,24]   |
| chr5:170751328  | NPM1    | coding_exon | ENST00000296930:GtoV;ENST00000351986:GtoV;ENST00000393820:GtoV;                      | + | GtoT | 0.1053 | 0.125  | 8  | 2  | [24,38]   |
| chr5:170751376  | NPM1    | coding_exon | ENST00000296930:GtoE;ENST00000351986:GtoE;ENST00000393820:GtoE;                      | + | GtoA | 0.1132 | 0.1923 | 10 | 4  | [27,90]   |
| chr5:170747596  | NPM1    | coding_exon |                                                                                      | + | GtoA | 0.1111 | 0.2105 | 9  | 4  | [18,27]   |
| chr5:170751006  | NPM1    | coding_exon |                                                                                      | + | AtoG | 0.18   | 0.3793 | 6  | 6  | [51,79]   |
| chr5:170751024  | NPM1    | coding_exon |                                                                                      | + | AtoC | 0.1    | 0.1    | 5  | 2  | [10,20]   |
| chr5:170751347  | NPM1    | coding_exon |                                                                                      | + | AtoT | 0.1    | 0.1111 | 2  | 2  | [47,61]   |
| chr5:170770300  | NPM1    | UTR3        |                                                                                      | + | TtoC | 0.1622 | 0.2083 | 6  | 4  | [25,50]   |
| chr5:170770306  | NPM1    | UTR3        |                                                                                      | + | TtoA | 0.1429 | 0.2581 | 3  | 3  | [14,31]   |
| chr5:170770442  | NPM1    | UTR3        |                                                                                      | + | TtoC | 0.108  | 0.1569 | 15 | 5  | [180,351] |
| chr5:170770476  | NPM1    | UTR3        |                                                                                      | + | CtoG | 0.1333 | 0.5882 | 15 | 15 | [13,67]   |
| chr5:170770477  | NPM1    | UTR3        |                                                                                      | + | AtoG | 0.12   | 0.2    | 8  | 2  | [25,25]   |
| chr5:170770479  | NPM1    | UTR3        |                                                                                      | + | TtoA | 0.2727 | 0.6923 | 5  | 5  | [12,20]   |
| chr5:170747465  | NPM1    | UTR5        |                                                                                      | + | TtoG | 0.1538 | 0.1667 | 5  | 2  | [12,26]   |
| chr15:71639466  | NPTN    | UTR3        |                                                                                      | - | AtoG | 0.1111 | 0.1538 | 5  | 3  | [10,18]   |
| chr15:71639812  | NPTN    | UTR3        |                                                                                      | - | TtoC | 0.1    | 0.1111 | 4  | 2  | [10,10]   |
| chr6:2962216    | NQO2    | coding_exon | ENST00000338130:Qto*;ENST00000380430:Qto*;ENST00000380441:Qto*;ENST00000338130:Qto*; | + | CtoT | 0.1    | 0.1    | 2  | 2  | [10,10]   |
| chr19:55573647  | NR1H2   | coding_exon | ENST00000253727:StoA;ENST00000376942:StoA;ENST00000411902:StoA;                      | + | TtoG | 0.1    | 0.3    | 4  | 3  | [10,14]   |
| chr19:55573644  | NR1H2   | coding_exon | ENST00000253727:EtoQ;ENST00000376942:EtoQ;ENST00000411902:EtoQ;                      | + | GtoC | 0.12   | 0.4    | 10 | 10 | [10,32]   |
| chr19:55573634  | NR1H2   | coding_exon |                                                                                      | + | AtoG | 0.1    | 0.1667 | 6  | 5  | [10,30]   |
| chr19:55571594  | NR1H2   | UTR5        |                                                                                      | + | TtoG | 0.1026 | 0.25   | 12 | 6  | [11,70]   |
| chr3:15054552   | NR2C2   | coding_exon | ENST00000323373:ItoL;ENST00000383792:ItoL;ENST00000393102:ItoL;ENST00000323373:ItoL; | + | AtoC | 0.1    | 0.1    | 2  | 2  | [10,10]   |
| chr19:19174658  | NR2C2AP | coding_exon | ENST00000331552:QtoR;ENST00000420605:QtoR;                                           | - | AtoG | 0.1053 | 0.1111 | 2  | 2  | [18,19]   |
| chr19:19174310  | NR2C2AP | coding_exon |                                                                                      | - | TtoC | 0.1176 | 0.125  | 3  | 2  | [16,17]   |
| chr19:19174352  | NR2C2AP | coding_exon |                                                                                      | - | CtoA | 0.1    | 0.1538 | 2  | 2  | [10,13]   |
| chr5:142655230  | NR3C1   | coding_exon | ENST00000231509:StoL;ENST00000343796:StoL;ENST00000394464:StoL;ENST00000231509:StoL; | - | CtoT | 0.1667 | 0.3    | 3  | 2  | [10,12]   |
| chr5:142655274  | NR3C1   | coding_exon | ENST00000231509:LtoR;ENST00000343796:LtoR;ENST00000394464:LtoR;ENST00000231509:LtoR; | - | TtoG | 0.1    | 0.12   | 11 | 2  | [10,25]   |
| chr5:142641094  | NR3C1   | mixed       |                                                                                      | - | TtoG | 0.1111 | 0.1818 | 4  | 2  | [10,11]   |
| chr5:142638962  | NR3C1   | UTR3        |                                                                                      | - | TtoC | 0.1    | 0.1316 | 4  | 2  | [30,38]   |
| chr11:124121996 | NRGN    | UTR3        |                                                                                      | + | AtoG | 0.1    | 0.1333 | 2  | 2  | [10,15]   |
| chr14:23642774  | NRL     | UTR5        |                                                                                      | - | AtoC | 0.1077 | 0.1351 | 3  | 2  | [37,65]   |
| chr6:30763820   | NRM     | UTR3        |                                                                                      | - | TtoC | 0.1    | 0.1389 | 5  | 3  | [10,36]   |
| chr20:278348    | NRSN2   | coding_exon | ENST00000246039:KtoE;ENST00000382285:KtoE;ENST00000382291:KtoE;                      | + | AtoG | 0.1667 | 0.2308 | 4  | 2  | [12,13]   |
| chr5:176653762  | NSD1    | coding_exon | ENST00000347982:StoP;ENST00000354179:StoP;ENST00000355783:StoP;ENST00000347982:StoP; | + | TtoC | 0.1    | 0.1333 | 2  | 2  | [10,15]   |
| chr5:176655302  | NSD1    | UTR3        |                                                                                      | + | AtoT | 0.1111 | 0.1429 | 2  | 2  | [15,18]   |
| chr5:176655783  | NSD1    | UTR3        |                                                                                      | + | CtoT | 0.1    | 0.1    | 2  | 2  | [10,10]   |
| chr5:176659396  | NSD1    | UTR3        |                                                                                      | + | AtoG | 0.1667 | 0.2    | 7  | 2  | [10,12]   |
| chr17:42161411  | NSF     | coding_exon | ENST00000398238:VtoA;                                                                | + | TtoC | 0.1053 | 0.1333 | 2  | 2  | [15,19]   |
| chr20:1374320   | NSFL1C  | coding_exon | ENST00000216879:HtoP;ENST00000350991:HtoP;ENST00000353088:HtoP;ENST00000216879:HtoP; | - | AtoC | 0.1224 | 0.1607 | 4  | 2  | [49,56]   |
| chr8:59658905   | NSMAF   | UTR3        |                                                                                      | - | GtoA | 0.125  | 0.1818 | 4  | 2  | [11,16]   |
| chr16:27143830  | NSMCE1  | UTR3        |                                                                                      | - | TtoC | 0.1053 | 0.1111 | 8  | 2  | [18,19]   |
| chr8:126232658  | NSMCE2  | coding_exon | ENST00000287437:QtoR;                                                                | + | AtoG | 0.1053 | 0.125  | 7  | 3  | [16,24]   |
| chr8:126232653  | NSMCE2  | coding_exon |                                                                                      | + | TtoC | 0.1    | 0.1    | 3  | 2  | [10,20]   |
| chr8:126173379  | NSMCE2  | UTR5        |                                                                                      | + | CtoA | 0.1429 | 0.2    | 6  | 3  | [10,20]   |
| chr10:123706726 | NSMCE4A | UTR3        |                                                                                      | - | AtoG | 0.1111 | 0.3    | 11 | 2  | [10,36]   |
| chr1:46598991   | NSUN4   | coding_exon | ENST00000447844:DtoA;                                                                | + | AtoC | 0.1429 | 0.1765 | 3  | 2  | [14,17]   |
| chr1:46600761   | NSUN4   | mixed       |                                                                                      | + | AtoG | 0.1    | 0.1    | 2  | 2  | [10,10]   |
| chr10:104849682 | NT5C2   | mixed       |                                                                                      | - | TtoG | 0.1    | 0.2    | 2  | 2  | [10,15]   |
| chr10:104850831 | NT5C2   | mixed       |                                                                                      | - | GtoC | 0.1    | 0.1    | 2  | 2  | [10,10]   |
| chr10:104839310 | NT5C2   | UTR3        |                                                                                      | - | GtoA | 0.1    | 0.1176 | 2  | 2  | [10,17]   |
| chr17:37235042  | NT5C3L  | UTR3        |                                                                                      | - | GtoA | 0.1    | 0.1333 | 4  | 2  | [10,15]   |
| chr16:15039446  | NTAN1   | coding_exon |                                                                                      | - | AtoG | 0.1    | 0.1    | 2  | 2  | [10,10]   |
| chr16:2033595   | NTHL1   | coding_exon | ENST00000219066:VtoG;                                                                | - | TtoG | 0.1    | 0.3    | 4  | 3  | [10,14]   |
| chr11:17308263  | NUC82   | coding_exon | ENST00000323688:QtoR;ENST00000405119:QtoR;ENST00000458064:QtoR;                      | + | AtoG | 0.1026 | 0.2    | 4  | 3  | [10,40]   |
| chr1:203953146  | NUCKS1  | mixed       |                                                                                      | - | CtoA | 0.1111 | 0.4    | 2  | 2  | [10,18]   |
| chr1:203953555  | NUCKS1  | mixed       |                                                                                      | - | AtoC | 0.1818 | 0.2    | 2  | 2  | [10,12]   |
| chr1:203953813  | NUCKS1  | mixed       |                                                                                      | - | GtoC | 0.1304 | 0.1429 | 5  | 3  | [21,36]   |
| chr1:203953814  | NUCKS1  | mixed       |                                                                                      | - | AtoT | 0.1    | 0.1613 | 6  | 3  | [19,31]   |
| chr1:203949054  | NUCKS1  | UTR3        |                                                                                      | - | CtoG | 0.1429 | 0.3846 | 3  | 2  | [13,21]   |
| chr1:203949072  | NUCKS1  | UTR3        |                                                                                      | - | TtoC | 0.1    | 0.125  | 3  | 3  | [10,20]   |
| chr1:203952434  | NUCKS1  | UTR3        |                                                                                      | - | TtoA | 0.1111 | 0.1667 | 3  | 2  | [12,18]   |
| chr1:203952496  | NUCKS1  | UTR3        |                                                                                      | - | TtoC | 0.1    | 0.125  | 7  | 2  | [30,32]   |
| chr1:203953037  | NUCKS1  | UTR3        |                                                                                      | - | TtoA | 0.1    | 0.1    | 2  | 2  | [10,10]   |
| chr1:27145470   | NUDC    | UTR3        |                                                                                      | + | CtoA | 0.1333 | 0.1538 | 3  | 2  | [13,15]   |
| chr1:27145471   | NUDC    | UTR3        |                                                                                      | + | AtoG | 0.1667 | 0.2143 | 7  | 4  | [11,18]   |
| chr5:162813581  | NUDCD2  | coding_exon |                                                                                      | - | TtoC | 0.1034 | 0.125  | 5  | 2  | [29,32]   |
| chr7:44389875   | NUDCD3  | UTR3        |                                                                                      | - | AtoC | 0.1    | 0.1818 | 3  | 3  | [10,15]   |
| chr7:2257206    | NUDT1   | UTR3        |                                                                                      | + | AtoC | 0.1    | 0.1944 | 6  | 4  | [11,36]   |
| chr9:34333284   | NUDT2   | coding_exon | ENST00000337747:EtoG;ENST00000346365:EtoG;ENST00000379154:EtoG;ENST00000337747:EtoG; | + | AtoG | 0.1    | 0.12   | 3  | 2  | [25,30]   |
| chr9:34333653   | NUDT2   | UTR3        |                                                                                      | + | AtoG | 0.1    | 0.1667 | 3  | 2  | [10,12]   |
| chr4:88598079   | NUDT9   | coding_exon | ENST00000302174:VtoA;ENST00000358033:VtoA;ENST00000440591:VtoA;                      | + | TtoC | 0.1111 | 0.1667 | 11 | 3  | [18,18]   |
| chr4:88598237   | NUDT9   | UTR3        |                                                                                      | + | AtoG | 0.1    | 0.1    | 3  | 2  | [10,10]   |
| chr17:24638835  | NUFIP2  | coding_exon |                                                                                      | - | TtoC | 0.1    | 0.1111 | 3  | 2  | [10,18]   |
| chr17:24615282  | NUFIP2  | UTR3        |                                                                                      | - | TtoA | 0.1    | 0.1818 | 4  | 2  | [10,11]   |
| chr12:67411668  | NUP107  | coding_exon | ENST00000229179:TtoA;                                                                | + | AtoG | 0.1111 | 0.2    | 3  | 2  | [10,18]   |
| chr12:67390075  | NUP107  | coding_exon | ENST00000229179:StoR;ENST00000378905:StoR;                                           | + | TtoA | 0.1    | 0.1333 | 5  | 2  | [10,15]   |
| chr1:227660553  | NUP133  | coding_exon | ENST00000261396:DtoE;ENST00000366679:DtoE;ENST00000366681:DtoE;                      | - | TtoA | 0.1176 | 0.2    | 4  | 2  | [10,17]   |
| chr6:17723728   | NUP153  | UTR3        |                                                                                      | - | AtoG | 0.1    | 0.1429 | 3  | 3  | [10,14]   |
| chr5:37335388   | NUP155  | coding_exon | ENST00000231498:CtoR;ENST00000381843:CtoR;ENST00000434056:CtoR;                      | - | TtoC | 0.1    | 0.1429 | 3  | 2  | [14,20]   |
| chr11:47791133  | NUP160  | coding_exon | ENST00000263764:LtoP;ENST00000378460:LtoP;                                           | - | TtoC | 0.1111 | 0.1333 | 2  | 2  | [18,30]   |
| chr11:47758561  | NUP160  | coding_exon |                                                                                      | - | AtoG | 0.1    | 0.1333 | 3  | 2  | [10,15]   |
| chr7:134923150  | NUP205  | coding_exon | ENST00000285968:EtoA;                                                                | + | AtoC | 0.1    | 0.1111 | 3  | 2  | [10,10]   |
| chr7:134954899  | NUP205  | coding_exon |                                                                                      | + | AtoG | 0.1    | 0.1    | 2  | 2  | [10,10]   |
| chr7:134983881  | NUP205  | UTR3        |                                                                                      | + | TtoG | 0.1    | 0.1    | 4  | 2  | [10,10]   |
| chr3:13370113   | NUP210  | coding_exon | ENST00000254508:TtoP;                                                                | - | AtoC | 0.1    | 0.2308 | 5  | 3  | [10,60]   |
| chr9:132995988  | NUP214  | coding_exon | ENST00000354226:KtoE;ENST00000359428:KtoE;ENST00000411637:KtoE;ENST00000354226:KtoE; | + | AtoG | 0.1    | 0.1667 | 9  | 2  | [10,12]   |
| chr12:100992271 | NUP37   | coding_exon |                                                                                      | - | TtoA | 0.1176 | 0.125  | 8  | 2  | [16,18]   |
| chr12:101030027 | NUP37   | coding_exon |                                                                                      | - | TtoC | 0.1304 | 0.1818 | 4  | 2  | [11,23]   |
| chr6:150087186  | NUP43   | UTR3        |                                                                                      | - | AtoG | 0.1667 | 0.2    | 2  | 2  | [12,20]   |
| chr6:150088781  | NUP43   | UTR3        |                                                                                      | - | AtoG | 0.1    | 0.1176 | 6  | 2  | [10,17]   |
| chr6:150089384  | NUP43   | UTR3        |                                                                                      | - | TtoG | 0.1    | 0.1    | 2  | 2  | [10,10]   |
| chr17:70743401  | NUP85   | UTR3        |                                                                                      | + | AtoG | 0.2    | 0.3333 | 4  | 4  | [10,12]   |

|                 |         |             |                                                                                        |   |      |        |        |    |    |         |
|-----------------|---------|-------------|----------------------------------------------------------------------------------------|---|------|--------|--------|----|----|---------|
| chr17:5230180   | NUP88   | UTR3        |                                                                                        | - | TtoC | 0.1    | 0.1667 | 3  | 2  | [10,12] |
| chr11:3653978   | NUP98   | coding_exon | ENST00000324932:VtoG;ENST00000355260:VtoG;                                             | - | TtoG | 0.1333 | 0.2    | 3  | 2  | [10,15] |
| chr11:3657376   | NUP98   | coding_exon | ENST00000324932:LtoP;ENST00000355260:LtoP;ENST00000359171:LtoP;                        | - | TtoC | 0.1333 | 0.1538 | 5  | 2  | [13,15] |
| chr11:3757032   | NUP98   | coding_exon |                                                                                        | - | AtoG | 0.1    | 0.1    | 7  | 2  | [10,11] |
| chr13:24812650  | NUPL1   | UTR3        |                                                                                        | + | TtoA | 0.1429 | 0.1667 | 6  | 2  | [12,14] |
| chr13:24813524  | NUPL1   | UTR3        |                                                                                        | + | AtoG | 0.1    | 0.1111 | 4  | 2  | [10,18] |
| chr7:23206862   | NUPL2   | coding_exon |                                                                                        | + | TtoC | 0.1    | 0.1    | 2  | 2  | [10,20] |
| chr6:118103927  | NUS1    | coding_exon | ENST00000368494:VtoD;                                                                  | + | TtoA | 0.1053 | 0.1579 | 2  | 2  | [19,19] |
| chr15:39460509  | NUSAP1  | UTR3        |                                                                                        | + | TtoC | 0.1765 | 0.25   | 6  | 4  | [10,19] |
| chr16:66462702  | NUTF2   | UTR3        |                                                                                        | + | CtoA | 0.1538 | 0.2    | 9  | 3  | [10,20] |
| chr16:66462705  | NUTF2   | UTR3        |                                                                                        | + | AtoG | 0.1579 | 0.3636 | 6  | 5  | [13,22] |
| chr12:111932908 | OAS2    | UTR3        |                                                                                        | + | AtoT | 0.1    | 0.1    | 3  | 2  | [10,10] |
| chr12:111895102 | OAS3    | UTR3        |                                                                                        | + | TtoG | 0.1136 | 0.2    | 6  | 5  | [19,45] |
| chr2:192254965  | OBFC2A  | coding_exon |                                                                                        | + | TtoC | 0.2727 | 0.3333 | 4  | 2  | [11,12] |
| chr9:130302513  | ODF2    | UTR3        |                                                                                        | + | AtoG | 0.1176 | 0.1667 | 4  | 2  | [12,17] |
| chr9:130302572  | ODF2    | UTR3        |                                                                                        | + | TtoG | 0.1    | 0.125  | 3  | 2  | [10,24] |
| chr22:49316866  | ODF3B   | coding_exon | ENST00000401779:WtoR;ENST00000456888:WtoR;                                             | - | TtoA | 0.2727 | 0.625  | 3  | 2  | [11,16] |
| chr22:49316870  | ODF3B   | coding_exon | ENST00000329363:GtoA;ENST00000405135:GtoA;ENST00000428989:GtoA;ENST00000428989:GtoA;   | - | GtoC | 0.1538 | 0.2    | 2  | 2  | [10,13] |
| chr22:49315726  | ODF3B   | UTR3        |                                                                                        | - | TtoC | 0.1    | 0.1667 | 3  | 2  | [12,20] |
| chr7:44715083   | OGDH    | UTR3        |                                                                                        | + | CtoA | 0.1053 | 0.1538 | 2  | 2  | [13,19] |
| chr16:55053975  | OGFOD1  | coding_exon | ENST00000336111:WtoR;                                                                  | + | TtoC | 0.1    | 0.1364 | 4  | 2  | [10,22] |
| chr16:55066926  | OGFOD1  | coding_exon | ENST00000336111:EtoG;                                                                  | + | AtoG | 0.1    | 0.1    | 4  | 2  | [10,10] |
| chr12:122029055 | OGFOD2  | coding_exon | ENST00000228922:MtoV;ENST00000397389:MtoV;ENST00000406539:MtoV;ENST00000406539:MtoV;   | + | AtoG | 0.1    | 0.1176 | 2  | 2  | [10,18] |
| chr12:122028963 | OGFOD2  | mixed       |                                                                                        | + | TtoA | 0.1    | 0.1053 | 3  | 2  | [10,20] |
| chr12:122030029 | OGFOD2  | UTR3        |                                                                                        | + | TtoC | 0.1    | 0.1667 | 2  | 2  | [10,12] |
| chr15:39411427  | OIP5    | coding_exon | ENST00000220514:itoV;                                                                  | - | AtoG | 0.1    | 0.1579 | 2  | 2  | [10,19] |
| chr3:194855475  | OPA1    | coding_exon | ENST00000361150:WtoR;ENST00000361150:WtoR;ENST000003611715:WtoR;ENST000003611715:WtoR; | + | TtoC | 0.1    | 0.2    | 5  | 2  | [10,10] |
| chr3:194815506  | OPA1    | coding_exon |                                                                                        | + | TtoG | 0.1    | 0.1667 | 2  | 2  | [10,13] |
| chr19:50748775  | OPA3    | coding_exon | ENST00000263275:VtoA;                                                                  | - | TtoC | 0.1    | 0.1    | 2  | 2  | [10,10] |
| chr19:50744316  | OPA3    | mixed       |                                                                                        | - | AtoG | 0.1    | 0.1053 | 4  | 2  | [19,20] |
| chr1:239823978  | OPN3    | UTR3        |                                                                                        | - | TtoC | 0.1    | 0.1    | 3  | 2  | [10,10] |
| chr1:239824338  | OPN3    | UTR3        |                                                                                        | - | AtoG | 0.1    | 0.2    | 3  | 2  | [10,10] |
| chr10:13192463  | OPTN    | coding_exon | ENST00000263036:KtoR;ENST00000378747:KtoR;ENST00000378748:KtoR;ENST00000378748:KtoR;   | + | AtoG | 0.1    | 0.1538 | 3  | 2  | [10,13] |
| chr10:13194567  | OPTN    | coding_exon | ENST00000263036:itoV;ENST00000378747:itoV;ENST00000378748:itoV;ENST00000378748:itoV;   | + | AtoG | 0.1    | 0.1111 | 4  | 3  | [18,40] |
| chr12:120564064 | ORAI1   | UTR3        |                                                                                        | + | GtoA | 0.1176 | 0.1667 | 6  | 2  | [12,17] |
| chr7:101873984  | ORAI2   | coding_exon | ENST00000356387:QtoR;ENST00000403646:QtoR;ENST00000458233:QtoR;ENST00000458233:QtoR;   | + | AtoG | 0.1    | 0.1    | 2  | 2  | [20,20] |
| chr7:101878972  | ORAI2   | UTR3        |                                                                                        | + | TtoC | 0.1    | 0.1    | 2  | 2  | [10,10] |
| chr16:30873049  | ORAI3   | UTR3        |                                                                                        | + | AtoT | 0.1    | 0.1    | 5  | 3  | [10,10] |
| chr11:69189699  | ORAOV1  | mixed       |                                                                                        | - | TtoC | 0.1    | 0.2    | 2  | 2  | [10,10] |
| chr11:52631997  | ORC1L   | coding_exon | ENST00000371566:KtoT;ENST00000371568:KtoT;                                             | - | AtoC | 0.1    | 0.1667 | 2  | 2  | [10,12] |
| chr1:52626856   | ORC1L   | coding_exon | ENST00000371566:itoS;ENST00000371568:itoS;                                             | - | TtoG | 0.1    | 0.1    | 2  | 2  | [10,10] |
| chr2:201498899  | ORC2L   | coding_exon | ENST00000234296:VtoA;                                                                  | - | TtoC | 0.1333 | 0.2    | 4  | 2  | [10,15] |
| chr2:201483790  | ORC2L   | UTR3        |                                                                                        | - | TtoC | 0.1    | 0.1111 | 3  | 2  | [10,18] |
| chr2:148446786  | ORC4L   | coding_exon | ENST00000264169:KtoE;ENST00000392857:KtoE;ENST00000392858:KtoE;                        | - | AtoG | 0.1333 | 0.1818 | 2  | 2  | [11,15] |
| chr2:148412431  | ORC4L   | coding_exon |                                                                                        | - | TtoC | 0.1    | 0.1053 | 6  | 2  | [10,19] |
| chr2:148409466  | ORC4L   | UTR3        |                                                                                        | - | TtoA | 0.1    | 0.125  | 6  | 2  | [10,16] |
| chr2:190344397  | ORMDL1  | UTR3        |                                                                                        | - | AtoG | 0.1    | 0.1304 | 7  | 2  | [20,23] |
| chr2:190355700  | ORMDL1  | UTR5        |                                                                                        | - | TtoC | 0.1    | 0.1    | 5  | 3  | [10,10] |
| chr11:59102378  | OSBP    | coding_exon | ENST00000263847:VtoA;ENST00000378235:VtoA;                                             | - | TtoC | 0.1    | 0.1    | 2  | 2  | [10,10] |
| chr11:59105546  | OSBP    | coding_exon | ENST00000263847:TtoI;ENST00000378235:TtoI;                                             | - | CtoT | 0.1    | 0.1    | 3  | 2  | [10,10] |
| chr11:59099624  | OSBP    | UTR3        |                                                                                        | - | GtoA | 0.1    | 0.1    | 2  | 2  | [10,10] |
| chr20:60302720  | OSBPL2  | UTR3        |                                                                                        | + | AtoG | 0.1    | 0.1538 | 3  | 2  | [10,13] |
| chr20:60303144  | OSBPL2  | UTR3        |                                                                                        | + | GtoT | 0.1    | 0.1053 | 2  | 2  | [10,19] |
| chr7:24816017   | OSBPL3  | mixed       |                                                                                        | - | TtoG | 0.1034 | 0.1111 | 8  | 3  | [18,29] |
| chr7:24821320   | OSBPL3  | mixed       |                                                                                        | - | AtoT | 0.1    | 0.1364 | 2  | 2  | [10,22] |
| chr7:24822809   | OSBPL3  | mixed       |                                                                                        | - | TtoC | 0.1    | 0.25   | 5  | 2  | [10,12] |
| chr7:24804427   | OSBPL3  | UTR3        |                                                                                        | - | TtoA | 0.1    | 0.1    | 2  | 2  | [10,10] |
| chr17:43241232  | OSBPL7  | coding_exon | ENST00000007414:QtoR;                                                                  | - | AtoG | 0.1    | 0.1    | 2  | 2  | [10,10] |
| chr14:19987012  | OSGEP   | coding_exon | ENST00000206542:itoV;                                                                  | - | AtoG | 0.1    | 0.1154 | 5  | 2  | [26,30] |
| chr14:19985241  | OSGEP   | coding_exon | ENST00000206542:*toK;                                                                  | - | TtoA | 0.1034 | 0.1429 | 6  | 2  | [21,30] |
| chr14:19985091  | OSGEP   | UTR3        |                                                                                        | - | TtoC | 0.1538 | 0.25   | 6  | 2  | [12,13] |
| chr2:190326944  | OSGEP1L | coding_exon |                                                                                        | - | TtoC | 0.1    | 0.1667 | 3  | 2  | [10,12] |
| chr3:197445857  | Osta    | mixed       |                                                                                        | + | AtoT | 0.1053 | 0.1111 | 5  | 2  | [18,19] |
| chr3:197449712  | Osta    | mixed       |                                                                                        | + | TtoG | 0.1    | 0.1875 | 3  | 2  | [16,20] |
| chr3:197449729  | Osta    | mixed       |                                                                                        | + | AtoT | 0.1    | 0.1    | 3  | 2  | [10,20] |
| chr4:109798066  | OSTC    | coding_exon | ENST00000361564:QtoR;                                                                  | + | AtoG | 0.1    | 0.2727 | 9  | 4  | [10,25] |
| chr4:109796232  | OSTC    | coding_exon | ENST00000361564:HtoR;                                                                  | + | AtoG | 0.1667 | 0.2    | 5  | 2  | [15,18] |
| chr4:109807891  | OSTC    | UTR3        |                                                                                        | + | AtoG | 0.1    | 0.1    | 5  | 3  | [10,10] |
| chr4:109807910  | OSTC    | UTR3        |                                                                                        | + | CtoA | 0.1    | 0.1304 | 2  | 2  | [10,25] |
| chr4:109808118  | OSTC    | UTR3        |                                                                                        | + | AtoG | 0.1    | 0.3333 | 14 | 11 | [10,56] |
| chr4:109808341  | OSTC    | UTR3        |                                                                                        | + | AtoG | 0.1    | 0.1111 | 2  | 2  | [10,18] |
| chr8:92159833   | OTUD6B  | coding_exon | ENST00000285420:AtoD;ENST00000404789:AtoD;                                             | + | CtoA | 0.1538 | 0.1538 | 3  | 2  | [13,13] |
| chr1:148182961  | OTUD7B  | coding_exon | ENST00000369135:KtoE;                                                                  | - | AtoG | 0.1    | 0.1    | 2  | 2  | [10,10] |
| chr20:17919727  | OVOL2   | mixed       |                                                                                        | - | TtoC | 0.1    | 0.1    | 2  | 2  | [10,10] |
| chr14:22310553  | OXA1L   | coding_exon |                                                                                        | + | TtoC | 0.1489 | 0.2297 | 5  | 2  | [47,75] |
| chr14:22310803  | OXA1L   | UTR3        |                                                                                        | + | AtoG | 0.2    | 0.25   | 2  | 2  | [10,12] |
| chr5:41766534   | OXCT1   | UTR3        |                                                                                        | - | TtoC | 0.125  | 0.1538 | 3  | 2  | [13,16] |
| chr5:41767521   | OXCT1   | UTR3        |                                                                                        | - | AtoG | 0.1    | 0.1    | 3  | 2  | [10,10] |
| chr3:25810730   | OXSM    | coding_exon | ENST00000280701:LtoH;ENST00000420173:LtoH;                                             | + | TtoA | 0.1    | 0.1    | 3  | 2  | [10,10] |
| chr3:25810599   | OXSM    | coding_exon |                                                                                        | + | TtoA | 0.1    | 0.1    | 2  | 2  | [10,10] |
| chr3:38271213   | OXSRI   | UTR3        |                                                                                        | + | GtoT | 0.1    | 0.1765 | 6  | 3  | [14,20] |
| chr3:38271712   | OXSRI   | UTR3        |                                                                                        | + | AtoG | 0.1    | 0.1351 | 2  | 2  | [20,37] |
| chr12:120156281 | P2RX4   | UTR3        |                                                                                        | + | TtoC | 0.1    | 0.1    | 3  | 2  | [10,10] |
| chr19:10086697  | P2RY11  | UTR3        |                                                                                        | + | AtoT | 0.122  | 0.1364 | 4  | 2  | [22,43] |
| chr19:10086699  | P2RY11  | UTR3        |                                                                                        | + | TtoC | 0.1091 | 0.2222 | 2  | 2  | [27,55] |
| chr10:74480958  | P4HA1   | coding_exon |                                                                                        | - | TtoA | 0.1    | 0.1176 | 4  | 3  | [10,17] |
| chr10:74437730  | P4HA1   | UTR3        |                                                                                        | - | GtoA | 0.1    | 0.1053 | 5  | 2  | [10,19] |
| chr3:49013988   | P4HTM   | coding_exon | ENST00000343546:StoC;ENST00000383729:StoC;ENST00000416619:StoC;                        | + | AtoT | 0.1    | 0.1    | 2  | 2  | [10,10] |
| chr3:49002973   | P4HTM   | coding_exon | ENST00000343546:GtoR;ENST00000383729:GtoR;ENST00000416619:GtoR;                        | + | GtoA | 0.1    | 0.1    | 2  | 2  | [10,10] |
| chr12:54793342  | PA2G4   | UTR3        |                                                                                        | + | TtoC | 0.1111 | 0.1667 | 5  | 3  | [12,18] |
| chr12:54793595  | PA2G4   | UTR3        |                                                                                        | + | GtoA | 0.1111 | 0.25   | 2  | 2  | [12,18] |
| chr12:54793931  | PA2G4   | UTR3        |                                                                                        | + | AtoG | 0.1    | 0.1538 | 3  | 2  | [10,13] |
| chr11:73298236  | PAAF1   | coding_exon | ENST00000310571:VtoG;ENST00000376384:VtoG;                                             | + | TtoG | 0.2    | 0.3636 | 8  | 2  | [10,11] |
| chr1:39799098   | PABPC4  | UTR3        |                                                                                        | - | TtoA | 0.1111 | 0.1429 | 2  | 2  | [14,18] |
| chr8:101791134  | PABPCP5 | coding_exon | ENST00000318607:VtoA;ENST00000347137:VtoA;                                             | - | TtoC | 0.1    | 0.1176 | 8  | 2  | [18,31] |
| chr8:101791112  | PABPCP5 | coding_exon | ENST00000318607:StoR;ENST00000347137:StoR;                                             | - | CtoA | 0.1    | 0.2143 | 12 | 6  | [20,41] |

|                |             |             |                                                                                      |   |       |        |        |    |    |          |
|----------------|-------------|-------------|--------------------------------------------------------------------------------------|---|-------|--------|--------|----|----|----------|
| chr8:101791113 | PABPCP5     | coding_exon | ENST00000318607:StoN;ENST00000347137:StoN;                                           | - | GtoA  | 0.1111 | 0.1667 | 3  | 2  | [12,27]  |
| chr8:101794519 | PABPCP5     | coding_exon | ENST00000318607:StoI;ENST00000347137:StoI;                                           | - | GtoT  | 0.1    | 0.1429 | 7  | 4  | [14,38]  |
| chr8:101794520 | PABPCP5     | coding_exon | ENST00000318607:StoC;ENST00000347137:StoC;                                           | - | AtoT  | 0.1071 | 0.12   | 7  | 2  | [25,30]  |
| chr8:101786343 | PABPCP5     | coding_exon | ENST00000318607:Sto*;ENST00000347137:Sto*;                                           | - | CtoG  | 0.1    | 0.1818 | 4  | 2  | [10,11]  |
| chr8:101790566 | PABPCP5     | coding_exon | ENST00000318607:RtoL;ENST00000347137:RtoL;                                           | - | GtoT  | 0.1333 | 0.1429 | 7  | 2  | [45,77]  |
| chr8:101794063 | PABPCP5     | coding_exon | ENST00000318607:RtoK;ENST00000347137:RtoK;                                           | - | AtoA  | 0.1415 | 0.1852 | 5  | 3  | [28,106] |
| chr8:101786337 | PABPCP5     | coding_exon | ENST00000318607:RtoH;ENST00000347137:RtoH;                                           | - | GtoA  | 0.1    | 0.2667 | 2  | 2  | [10,16]  |
| chr8:101790554 | PABPCP5     | coding_exon | ENST00000318607:QtoL;ENST00000347137:QtoL;                                           | - | AtoT  | 0.1148 | 0.1311 | 11 | 3  | [63,117] |
| chr8:101799637 | PABPCP5     | coding_exon | ENST00000318607:PttoI;ENST00000347137:PttoI;                                         | - | CtoA  | 0.1    | 0.2381 | 12 | 11 | [28,105] |
| chr8:101799636 | PABPCP5     | coding_exon | ENST00000318607:PttoR;ENST00000347137:PttoR;                                         | - | CtoG  | 0.1538 | 0.2381 | 11 | 3  | [22,79]  |
| chr8:101786358 | PABPCP5     | coding_exon | ENST00000318607:LtoP;ENST00000347137:LtoP;                                           | - | TtoC  | 0.1111 | 0.2258 | 10 | 6  | [13,37]  |
| chr8:101793767 | PABPCP5     | coding_exon | ENST00000318607:KtoT;ENST00000347137:KtoT;                                           | - | AtoC  | 0.1351 | 0.1429 | 9  | 2  | [39,56]  |
| chr8:101793766 | PABPCP5     | coding_exon | ENST00000318607:KtoN;ENST00000347137:KtoN;                                           | - | GtoT  | 0.1    | 0.1389 | 11 | 4  | [36,62]  |
| chr8:101791111 | PABPCP5     | coding_exon | ENST00000318607:KtoE;ENST00000347137:KtoE;                                           | - | AtoG  | 0.1053 | 0.2188 | 14 | 8  | [13,39]  |
| chr8:101793825 | PABPCP5     | coding_exon | ENST00000318607:IttoV;ENST00000347137:IttoV;                                         | - | AtoG  | 0.1667 | 0.1667 | 3  | 2  | [12,12]  |
| chr8:101791105 | PABPCP5     | coding_exon | ENST00000318607:FtoL;ENST00000347137:FtoL;                                           | - | TtoC  | 0.1176 | 0.125  | 13 | 2  | [16,18]  |
| chr8:101796895 | PABPCP5     | coding_exon | ENST00000318607:EtoV;ENST00000347137:EtoV;                                           | - | AtoT  | 0.1356 | 0.4    | 9  | 3  | [16,64]  |
| chr8:101796896 | PABPCP5     | coding_exon | ENST00000318607:EtoQ;ENST00000347137:EtoQ;                                           | - | GtoC  | 0.1136 | 0.175  | 6  | 3  | [40,57]  |
| chr8:101793816 | PABPCP5     | coding_exon | ENST00000318607:EtoK;ENST00000347137:EtoK;                                           | - | GtoA  | 0.125  | 0.1429 | 3  | 2  | [14,17]  |
| chr8:101785787 | PABPCP5     | coding_exon | ENST00000318607:EtoG;ENST00000347137:EtoG;                                           | - | AtoG  | 0.1    | 0.1111 | 4  | 2  | [10,10]  |
| chr8:101786345 | PABPCP5     | coding_exon | ENST00000318607:EtoD;ENST00000347137:EtoD;                                           | - | GtoT  | 0.1765 | 0.1818 | 7  | 2  | [12,17]  |
| chr8:101786354 | PABPCP5     | coding_exon | ENST00000318607:EtoD;ENST00000347137:EtoD;                                           | - | GtoT  | 0.1053 | 0.1176 | 5  | 2  | [17,19]  |
| chr8:101785791 | PABPCP5     | coding_exon | ENST00000318607:DtoH;ENST00000347137:DtoH;                                           | - | GtoC  | 0.2    | 0.4667 | 5  | 4  | [10,15]  |
| chr8:101796907 | PABPCP5     | coding_exon | ENST00000318607:DtoG;ENST00000347137:DtoG;                                           | - | AtoG  | 0.1    | 0.125  | 3  | 3  | [10,24]  |
| chr8:101793817 | PABPCP5     | coding_exon | ENST00000318607:DtoE;ENST00000347137:DtoE;                                           | - | TtoG  | 0.2    | 0.2727 | 6  | 2  | [10,11]  |
| chr8:101791093 | PABPCP5     | coding_exon | ENST00000318607:CtoS;ENST00000347137:CtoS;                                           | - | TtoA  | 0.1176 | 0.2    | 7  | 4  | [12,20]  |
| chr8:101785784 | PABPCP5     | coding_exon | ENST00000318607:AttoV;ENST00000347137:AttoV;                                         | - | CtoT  | 0.1    | 0.3636 | 3  | 3  | [10,16]  |
| chr8:101796950 | PABPCP5     | coding_exon | ENST00000318607:AttoI;ENST00000347137:AttoI;                                         | - | GtoA  | 0.1071 | 0.4179 | 19 | 16 | [14,101] |
| chr8:101785785 | PABPCP5     | coding_exon | ENST00000318607:AttoP;ENST00000347137:AttoP;                                         | - | GtoC  | 0.1    | 0.25   | 3  | 3  | [10,12]  |
| chr8:101796949 | PABPCP5     | coding_exon | ENST00000318607:AttoG;ENST00000347137:AttoG;                                         | - | CtoG  | 0.1    | 0.4203 | 21 | 17 | [10,101] |
| chr8:101785771 | PABPCP5     | coding_exon |                                                                                      | - | AttoT | 0.1176 | 0.1351 | 7  | 2  | [17,39]  |
| chr8:101788073 | PABPCP5     | coding_exon |                                                                                      | - | AttoG | 0.1    | 0.1507 | 9  | 3  | [51,116] |
| chr8:101788079 | PABPCP5     | coding_exon |                                                                                      | - | AttoC | 0.1061 | 0.2857 | 12 | 9  | [51,160] |
| chr8:101790568 | PABPCP5     | coding_exon |                                                                                      | - | TtoC  | 0.125  | 0.1724 | 7  | 5  | [29,43]  |
| chr8:101790574 | PABPCP5     | coding_exon |                                                                                      | - | AttoG | 0.1042 | 0.1556 | 2  | 2  | [47,49]  |
| chr8:101791118 | PABPCP5     | coding_exon |                                                                                      | - | TtoC  | 0.125  | 0.2381 | 11 | 2  | [21,24]  |
| chr8:101794062 | PABPCP5     | coding_exon |                                                                                      | - | AttoG | 0.11   | 0.1852 | 6  | 2  | [27,100] |
| chr8:101794545 | PABPCP5     | coding_exon |                                                                                      | - | AttoG | 0.1064 | 0.125  | 4  | 2  | [35,48]  |
| chr8:101784321 | PABPCP5     | UTR3        |                                                                                      | - | TtoC  | 0.1429 | 0.25   | 6  | 3  | [12,22]  |
| chr8:101784503 | PABPCP5     | UTR3        |                                                                                      | - | TtoC  | 0.1013 | 0.1263 | 7  | 2  | [81,98]  |
| chr8:101784599 | PABPCP5     | UTR3        |                                                                                      | - | AttoG | 0.1    | 0.1111 | 7  | 3  | [10,38]  |
| chr8:101784600 | PABPCP5     | UTR3        |                                                                                      | - | CtoA  | 0.1    | 0.125  | 9  | 3  | [16,29]  |
| chr8:101784606 | PABPCP5     | UTR3        |                                                                                      | - | GtoA  | 0.1    | 0.3889 | 15 | 8  | [14,31]  |
| chr8:101803472 | PABPCP5     | UTR5        |                                                                                      | - | GtoC  | 0.1    | 0.1538 | 2  | 2  | [10,13]  |
| chr14:22864695 | PABPN1      | UTR3        |                                                                                      | + | AttoC | 0.1143 | 0.1964 | 5  | 3  | [32,56]  |
| chr14:22865013 | PABPN1      | UTR3        |                                                                                      | + | TtoC  | 0.1034 | 0.1429 | 14 | 5  | [15,29]  |
| chr14:22865182 | PABPN1      | UTR3        |                                                                                      | + | TtoC  | 0.1    | 0.1429 | 6  | 2  | [10,14]  |
| chr22:41595729 | PACSN2      | UTR3        |                                                                                      | - | TtoC  | 0.1429 | 0.15   | 4  | 2  | [14,20]  |
| chr17:2532980  | PAFAH1B1    | UTR3        |                                                                                      | + | TtoA  | 0.1    | 0.1    | 2  | 2  | [10,10]  |
| chr17:2535168  | PAFAH1B1    | UTR3        |                                                                                      | + | AttoG | 0.1    | 0.1304 | 4  | 2  | [10,23]  |
| chr17:2535473  | PAFAH1B1    | UTR3        |                                                                                      | + | AttoG | 0.1429 | 0.2308 | 3  | 2  | [13,14]  |
| chr17:2488238  | PAFAH1B1    | UTR5        |                                                                                      | + | AttoG | 0.12   | 0.1333 | 8  | 2  | [15,25]  |
| chr19:47496219 | PAFAH1B3    | coding_exon | ENST00000262890:TtoA;                                                                | - | AttoG | 0.1    | 0.1    | 3  | 2  | [10,10]  |
| chr5:43591725  | PAIP1       | coding_exon |                                                                                      | - | TtoA  | 0.1    | 0.2143 | 6  | 2  | [10,14]  |
| chr5:138727405 | PAIP2       | coding_exon |                                                                                      | + | AttoG | 0.1    | 0.2    | 3  | 2  | [10,30]  |
| chr11:76742248 | PAK1        | coding_exon | ENST00000278568:FtoL;ENST00000356341:FtoL;                                           | - | TtoC  | 0.1429 | 0.2    | 2  | 2  | [10,15]  |
| chr15:38300437 | PAK6        | UTR5        |                                                                                      | + | TtoC  | 0.1    | 0.1    | 3  | 2  | [10,10]  |
| chr16:23542873 | PALB2       | coding_exon | ENST00000261584:LtoP;                                                                | - | TtoC  | 0.1    | 0.1    | 2  | 2  | [10,10]  |
| chr9:111972128 | PALM2-AKAP2 | UTR3        |                                                                                      | + | TtoC  | 0.1176 | 0.2353 | 6  | 2  | [18,18]  |
| chr9:111972301 | PALM2-AKAP2 | UTR3        |                                                                                      | + | CtoA  | 0.125  | 0.1538 | 3  | 2  | [13,16]  |
| chr9:111974552 | PALM2-AKAP2 | UTR3        |                                                                                      | + | AttoG | 0.1    | 0.1333 | 5  | 3  | [10,19]  |
| chr5:102370513 | PAM         | coding_exon | ENST00000304400:VtoG;ENST00000345721:VtoG;ENST00000346918:VtoG;ENST00000346918:VtoG; | + | TtoG  | 0.1429 | 0.1818 | 4  | 2  | [11,21]  |
| chr5:102337967 | PAM         | mixed       |                                                                                      | + | CtoA  | 0.1    | 0.1    | 2  | 2  | [10,10]  |
| chr5:102366690 | PAM         | mixed       |                                                                                      | + | AttoG | 0.1    | 0.1429 | 2  | 2  | [10,14]  |
| chr12:55004346 | PAN2        | coding_exon | ENST00000257931:StoG;ENST00000379495:StoG;ENST00000425394:StoG;ENST00000425394:StoG; | - | AttoG | 0.1    | 0.1667 | 4  | 2  | [10,12]  |
| chr12:55013030 | PAN2        | coding_exon | ENST00000257931:LtoP;ENST00000379495:LtoP;ENST00000425394:LtoP;ENST00000425394:LtoP; | - | TtoC  | 0.1    | 0.1    | 2  | 2  | [10,10]  |
| chr12:54999230 | PAN2        | coding_exon |                                                                                      | - | GtoT  | 0.1667 | 0.1667 | 3  | 2  | [12,12]  |
| chr13:27752636 | PAN3        | coding_exon |                                                                                      | + | TtoC  | 0.1    | 0.1    | 2  | 2  | [10,10]  |
| chr13:27766698 | PAN3        | UTR3        |                                                                                      | + | TtoC  | 0.1    | 0.1    | 2  | 2  | [10,10]  |
| chr13:27766862 | PAN3        | UTR3        |                                                                                      | + | TtoC  | 0.1364 | 0.1579 | 2  | 2  | [19,22]  |
| chr20:3845690  | PANK2       | coding_exon | ENST00000316562:LtoR;ENST00000361370:LtoR;ENST00000399552:LtoR;ENST00000399552:LtoR; | + | TtoG  | 0.1111 | 0.2    | 11 | 2  | [10,18]  |
| chr20:3845697  | PANK2       | coding_exon |                                                                                      | + | AttoG | 0.1    | 0.125  | 4  | 3  | [10,25]  |
| chr11:93552679 | PANX1       | coding_exon | ENST00000227638:VtoA;ENST00000436171:VtoA;                                           | + | TtoC  | 0.1    | 0.1    | 4  | 2  | [10,10]  |
| chr5:79017379  | PAPD4       | UTR3        |                                                                                      | + | AttoG | 0.1053 | 0.1765 | 5  | 4  | [17,32]  |
| chr5:78944653  | PAPD4       | UTR5        |                                                                                      | + | AttoG | 0.1    | 0.1    | 3  | 2  | [10,10]  |
| chr14:96073110 | PAPOLA      | coding_exon | ENST00000216277:StoP;                                                                | + | TtoC  | 0.1    | 0.125  | 12 | 3  | [10,34]  |
| chr14:96056178 | PAPOLA      | coding_exon | ENST00000216277:QtoH;                                                                | + | AttoC | 0.1026 | 0.1818 | 9  | 5  | [38,57]  |
| chr14:96064092 | PAPOLA      | coding_exon | ENST00000216277:ltoK;                                                                | + | TtoA  | 0.1333 | 0.1389 | 6  | 2  | [16,37]  |
| chr6:52378422  | PAQR8       | coding_exon | ENST00000361841:StoP;ENST00000442253:StoP;                                           | + | TtoC  | 0.1    | 0.1818 | 4  | 2  | [10,11]  |
| chr6:52377411  | PAQR8       | coding_exon | ENST00000361841:AttoS;ENST00000442253:AttoS;                                         | + | GtoT  | 0.1    | 0.125  | 2  | 2  | [10,16]  |
| chr10:34666260 | PARD3       | coding_exon | ENST00000340077:StoG;ENST00000346874:StoG;ENST00000347488:StoG;ENST00000347488:StoG; | - | AttoG | 0.1    | 0.1    | 3  | 2  | [10,10]  |
| chr3:185085358 | PARL        | UTR5        |                                                                                      | - | TtoG  | 0.1    | 0.1    | 2  | 2  | [10,10]  |
| chr16:14605575 | PARN        | coding_exon | ENST00000341484:YtoN;ENST00000420015:YtoN;ENST00000437198:YtoN;                      | - | TtoA  | 0.1    | 0.1    | 3  | 2  | [10,10]  |
| chr16:14448285 | PARN        | coding_exon | ENST00000341484:KtoE;ENST00000420015:KtoE;ENST00000437198:KtoE;                      | - | AttoG | 0.1    | 0.1053 | 3  | 2  | [10,19]  |
| chr8:145131195 | PARP10      | coding_exon |                                                                                      | - | AttoG | 0.1    | 0.1053 | 2  | 2  | [10,19]  |
| chr7:139403215 | PARP12      | coding_exon | ENST00000263549:PtoT;                                                                | - | CtoA  | 0.1    | 0.1176 | 2  | 2  | [10,17]  |
| chr7:139372585 | PARP12      | coding_exon | ENST00000263549:GtoE;                                                                | - | GtoA  | 0.1    | 0.2    | 3  | 2  | [10,10]  |
| chr3:123921923 | PARP14      | coding_exon | ENST00000310276:KtoQ;ENST00000310290:KtoQ;ENST00000398157:KtoQ;ENST00000398157:KtoQ; | + | AttoC | 0.1    | 0.1333 | 7  | 3  | [20,30]  |
| chr3:123901737 | PARP14      | mixed       |                                                                                      | + | TtoC  | 0.125  | 0.1429 | 3  | 2  | [14,16]  |
| chr3:123932316 | PARP14      | UTR3        |                                                                                      | + | TtoC  | 0.1    | 0.1333 | 5  | 2  | [10,15]  |
| chr3:123818607 | PARP15      | coding_exon |                                                                                      | + | TtoC  | 0.1    | 0.125  | 6  | 2  | [10,17]  |
| chr14:19893777 | PARP2       | coding_exon | ENST00000250416:TtoR;ENST00000429687:TtoR;ENST00000446919:TtoR;                      | + | CtoG  | 0.1765 | 0.1818 | 5  | 2  | [11,17]  |
| chr14:19890338 | PARP2       | coding_exon | ENST00000250416:NtoD;ENST00000429687:NtoD;                                           | + | AttoG | 0.1    | 0.1176 | 4  | 2  | [10,17]  |
| chr14:19895707 | PARP2       | coding_exon | ENST00000250416:NtoD;ENST00000429687:NtoD;                                           | + | AttoG | 0.1    | 0.1176 | 7  | 3  | [10,19]  |
| chr14:19895519 | PARP2       | coding_exon | ENST00000250416:LtoR;ENST00000429687:LtoR;                                           | + | TtoG  | 0.1111 | 0.2258 | 4  | 2  | [18,32]  |
| chr14:19895117 | PARP2       | coding_exon | ENST00000250416:LtoQ;ENST00000429687:LtoQ;ENST00000446919:LtoQ;                      | + | TtoA  | 0.1053 | 0.1333 | 4  | 2  | [15,19]  |

|                 |         |             |                                                                             |   |       |        |        |    |   |           |
|-----------------|---------|-------------|-----------------------------------------------------------------------------|---|-------|--------|--------|----|---|-----------|
| chr14:19892155  | PARP2   | coding_exon |                                                                             | + | GtoA  | 0.1176 | 0.125  | 3  | 2 | [16,17]   |
| chr15:70336789  | PARP6   | coding_exon | ENST00000260376:LtoP;ENST00000287196:LtoP;ENST00000336471:LtoP;ENST000      | - | TtoC  | 0.125  | 0.1429 | 6  | 2 | [15,16]   |
| chr5:50159615   | PARP8   | coding_exon |                                                                             | + | TtoA  | 0.1    | 0.1333 | 6  | 3 | [10,15]   |
| chr3:123757164  | PARP9   | coding_exon | ENST00000360356:IttoV;ENST00000452457:IttoV;ENST00000462315:IttoV;ENST00000 | - | AttoG | 0.1176 | 0.2308 | 11 | 5 | [13,19]   |
| chr3:123737766  | PARP9   | coding_exon |                                                                             | - | AttoG | 0.1    | 0.1538 | 2  | 2 | [10,13]   |
| chr3:123757108  | PARP9   | coding_exon |                                                                             | - | AttoG | 0.1    | 0.1    | 2  | 2 | [10,20]   |
| chr3:123761245  | PARP9   | UTR5        |                                                                             | - | AttoT | 0.1    | 0.1111 | 2  | 2 | [10,10]   |
| chr1:54995338   | PARS2   | mixed       |                                                                             | - | GtoT  | 0.1    | 0.1    | 2  | 2 | [10,10]   |
| chr11:59183492  | PATL1   | coding_exon | ENST00000300146:RtoC;ENST00000428532:RtoC;                                  | - | CtoT  | 0.1538 | 0.5333 | 3  | 3 | [11,15]   |
| chr11:59183303  | PATL1   | coding_exon | ENST00000300146:Qto*;ENST00000428532:Qto*;                                  | - | CtoT  | 0.1667 | 0.8    | 4  | 2 | [10,12]   |
| chr11:59183334  | PATL1   | coding_exon |                                                                             | - | TtoC  | 0.1    | 0.1333 | 4  | 2 | [15,40]   |
| chr11:59183430  | PATL1   | coding_exon |                                                                             | - | GtoA  | 0.1538 | 0.2727 | 2  | 2 | [11,13]   |
| chr11:59171846  | PATL1   | mixed       |                                                                             | - | CtoT  | 0.1    | 0.1071 | 4  | 2 | [28,30]   |
| chr12:78514452  | PAWR    | coding_exon |                                                                             | - | AttoG | 0.1    | 0.2    | 3  | 2 | [10,11]   |
| chr9:37023984   | PAX5    | coding_exon |                                                                             | - | AttoC | 0.1111 | 0.1176 | 4  | 2 | [18,34]   |
| chr9:36823550   | PAX5    | UTR3        |                                                                             | - | GtoA  | 0.1    | 0.1667 | 3  | 3 | [10,19]   |
| chr9:36823819   | PAX5    | UTR3        |                                                                             | - | TtoA  | 0.1    | 0.1    | 3  | 2 | [10,10]   |
| chr9:36823882   | PAX5    | UTR3        |                                                                             | - | TtoA  | 0.1667 | 0.2    | 2  | 2 | [10,12]   |
| chr7:154398355  | PAXIP1  | coding_exon | ENST00000323199:PtoR;ENST00000397192:PtoR;ENST00000404141:PtoR;ENST000      | - | CtoG  | 0.1    | 0.1667 | 2  | 2 | [10,12]   |
| chr7:154385099  | PAXIP1  | coding_exon |                                                                             | - | AttoG | 0.1667 | 0.1765 | 2  | 2 | [12,17]   |
| chr7:105700327  | PBEF1   | coding_exon | ENST00000222553:HtoR;ENST00000354289:HtoR;ENST00000393617:HtoR;             | - | AttoG | 0.1111 | 0.2    | 9  | 7 | [10,22]   |
| chr9:127765122  | PBX3    | coding_exon | ENST00000373483:LtoP;ENST00000373487:LtoP;ENST00000373489:LtoP;ENST000      | + | TtoC  | 0.1333 | 0.1667 | 5  | 2 | [12,15]   |
| chr9:127769351  | PBX3    | UTR3        |                                                                             | + | AttoG | 0.1538 | 0.1667 | 2  | 2 | [12,13]   |
| chr10:72313333  | PCBD1   | UTR3        |                                                                             | - | AttoG | 0.1    | 0.125  | 7  | 4 | [10,20]   |
| chr5:134324233  | PCBD2   | coding_exon | ENST00000254908:LtoP;ENST00000398833:LtoP;                                  | + | TtoC  | 0.1    | 0.1818 | 2  | 2 | [10,11]   |
| chr12:52159723  | PCBP2   | UTR3        |                                                                             | + | TtoG  | 0.2308 | 0.2368 | 2  | 2 | [13,40]   |
| chr12:52159874  | PCBP2   | UTR3        |                                                                             | + | TtoA  | 0.1034 | 0.2105 | 7  | 5 | [10,30]   |
| chr12:52159885  | PCBP2   | UTR3        |                                                                             | + | TtoA  | 0.1    | 0.2    | 6  | 2 | [10,10]   |
| chr12:52160860  | PCBP2   | UTR3        |                                                                             | + | GtoA  | 0.1111 | 0.1364 | 2  | 2 | [18,22]   |
| chr3:137531642  | PCCB    | mixed       |                                                                             | + | TtoC  | 0.1    | 0.1905 | 7  | 2 | [20,21]   |
| chr3:137539193  | PCCB    | UTR3        |                                                                             | + | AttoG | 0.1    | 0.1    | 2  | 2 | [10,10]   |
| chr11:82557470  | PCF11   | coding_exon |                                                                             | + | TtoC  | 0.1    | 0.1    | 3  | 2 | [10,10]   |
| chr11:82573803  | PCF11   | UTR3        |                                                                             | + | TtoC  | 0.1333 | 0.1429 | 2  | 2 | [14,15]   |
| chr4:745182     | PCGF3   | coding_exon | ENST00000362003:LtoP;ENST00000470161:LtoP;                                  | + | TtoC  | 0.1111 | 0.1176 | 4  | 2 | [17,18]   |
| chr4:717578     | PCGF3   | coding_exon | ENST00000362003:FtoV;ENST00000470161:FtoV;                                  | + | TtoG  | 0.1667 | 0.2    | 3  | 2 | [10,12]   |
| chr4:749931     | PCGF3   | UTR3        |                                                                             | + | TtoG  | 0.1    | 0.1    | 3  | 2 | [10,10]   |
| chr4:750196     | PCGF3   | UTR3        |                                                                             | + | CtoT  | 0.1    | 0.1    | 2  | 2 | [10,10]   |
| chr4:750888     | PCGF3   | UTR3        |                                                                             | + | CtoT  | 0.1    | 0.4286 | 2  | 2 | [10,14]   |
| chr4:751258     | PCGF3   | UTR3        |                                                                             | + | TtoC  | 0.1    | 0.1818 | 4  | 2 | [10,11]   |
| chr10:93030360  | PCGF5   | UTR3        |                                                                             | + | TtoC  | 0.1429 | 0.1875 | 2  | 2 | [14,16]   |
| chr13:112887847 | PCID2   | coding_exon | ENST00000246505:WtoR;ENST00000246506:WtoR;ENST00000337344:WtoR;ENST         | - | TtoC  | 0.1111 | 0.1429 | 6  | 2 | [14,29]   |
| chr13:112880443 | PCID2   | UTR3        |                                                                             | - | TtoC  | 0.1053 | 0.1364 | 5  | 2 | [19,22]   |
| chr20:44003239  | PCIF1   | coding_exon | ENST00000372409:CtoF;ENST00000443130:CtoF;                                  | + | GtoT  | 0.1    | 0.1    | 2  | 2 | [10,10]   |
| chr8:17867874   | PCM1    | coding_exon | ENST00000325083:QtoR;ENST00000327578:QtoR;ENST00000412583:QtoR;             | + | AttoG | 0.1    | 0.1154 | 3  | 3 | [10,26]   |
| chr8:17893466   | PCM1    | coding_exon | ENST00000325083:GtoD;ENST00000327578:GtoD;ENST00000412583:GtoD;             | + | GtoA  | 0.1    | 0.1579 | 9  | 6 | [10,37]   |
| chr8:17893487   | PCM1    | coding_exon | ENST00000325083:EtoA;ENST00000327578:EtoA;ENST00000412583:EtoA;             | + | AttoC | 0.1    | 0.1667 | 11 | 5 | [12,40]   |
| chr8:17893467   | PCM1    | coding_exon |                                                                             | + | TtoA  | 0.1176 | 0.2083 | 10 | 5 | [12,29]   |
| chr8:17837417   | PCM1    | mixed       |                                                                             | + | TtoC  | 0.1    | 0.1053 | 4  | 2 | [10,19]   |
| chr6:150165052  | PCMT1   | coding_exon |                                                                             | + | AttoT | 0.1053 | 0.125  | 4  | 2 | [16,19]   |
| chr20:5048591   | PCNA    | UTR5        |                                                                             | - | AttoT | 0.1111 | 0.1111 | 5  | 2 | [18,45]   |
| chr21:46655532  | PCNT    | coding_exon | ENST00000359568:VtoA;                                                       | + | TtoC  | 0.1    | 0.1    | 2  | 2 | [10,10]   |
| chr21:46674382  | PCNT    | coding_exon | ENST00000359568:EtoG;                                                       | + | AttoG | 0.1    | 0.1    | 3  | 2 | [10,20]   |
| chr14:70515114  | PCNX    | coding_exon |                                                                             | + | TtoC  | 0.1    | 0.1538 | 2  | 2 | [10,13]   |
| chr14:70646596  | PCNX    | UTR3        |                                                                             | + | AttoC | 0.1    | 0.1111 | 3  | 2 | [10,10]   |
| chr11:65141554  | PCNXL3  | coding_exon | ENST00000355703:RtoT;                                                       | + | GtoC  | 0.1111 | 0.15   | 2  | 2 | [18,20]   |
| chr11:65154620  | PCNXL3  | coding_exon | ENST00000355703:LtoP;ENST00000439247:LtoP;                                  | + | TtoC  | 0.1111 | 0.125  | 6  | 2 | [16,18]   |
| chr11:65154477  | PCNXL3  | coding_exon |                                                                             | + | TtoC  | 0.1111 | 0.125  | 3  | 2 | [16,18]   |
| chr11:116594456 | PCSK7   | coding_exon |                                                                             | - | TtoC  | 0.1    | 0.2353 | 3  | 2 | [17,31]   |
| chr12:95229072  | PCTK2   | coding_exon |                                                                             | - | GtoA  | 0.1    | 0.1    | 2  | 2 | [10,10]   |
| chr7:98830257   | PDAP1   | mixed       |                                                                             | - | CtoT  | 0.1154 | 0.25   | 4  | 3 | [20,51]   |
| chr10:105150195 | PDCD11  | coding_exon | ENST00000369797:AtoS;                                                       | + | GtoT  | 0.1    | 0.1818 | 2  | 2 | [11,20]   |
| chr6:170728573  | PDCD2   | coding_exon |                                                                             | - | AttoG | 0.1071 | 0.1176 | 8  | 2 | [17,28]   |
| chr10:112648280 | PDCD4   | UTR3        |                                                                             | + | TtoA  | 0.1053 | 0.1765 | 10 | 5 | [17,45]   |
| chr10:112648281 | PDCD4   | UTR3        |                                                                             | + | AttoG | 0.1053 | 0.125  | 5  | 2 | [19,24]   |
| chr5:368077     | PDCD6   | mixed       |                                                                             | + | AttoG | 0.1    | 0.1    | 2  | 2 | [10,10]   |
| chr5:489022     | PDCD6   | UTR3        |                                                                             | + | GtoC  | 0.1    | 0.1333 | 2  | 2 | [10,15]   |
| chr5:489290     | PDCD6   | UTR3        |                                                                             | + | AttoG | 0.1333 | 0.2    | 4  | 3 | [15,21]   |
| chr5:490017     | PDCD6   | UTR3        |                                                                             | + | TtoA  | 0.1    | 0.1667 | 4  | 2 | [10,18]   |
| chr5:490984     | PDCD6   | UTR3        |                                                                             | + | AttoT | 0.1538 | 0.2    | 2  | 2 | [10,13]   |
| chr15:63197551  | PDCD7   | UTR3        |                                                                             | - | TtoG  | 0.1    | 0.1176 | 5  | 2 | [10,17]   |
| chr9:124622141  | PDCL    | UTR3        |                                                                             | - | AttoG | 0.1    | 0.1111 | 2  | 2 | [10,19]   |
| chr2:100559287  | PDCL3   | coding_exon | ENST00000264254:TtoI;                                                       | + | CtoT  | 0.1176 | 0.5882 | 10 | 5 | [17,48]   |
| chr2:100551896  | PDCL3   | coding_exon | ENST00000264254:RtoC;                                                       | + | CtoT  | 0.1333 | 0.175  | 7  | 2 | [15,40]   |
| chr2:100559362  | PDCL3   | coding_exon | ENST00000264254:KtoR;                                                       | + | AttoG | 0.1154 | 0.125  | 2  | 2 | [24,26]   |
| chr2:100554512  | PDCL3   | coding_exon | ENST00000264254:HtoN;                                                       | + | CtoA  | 0.1111 | 0.3462 | 8  | 5 | [15,26]   |
| chr2:100552521  | PDCL3   | coding_exon | ENST00000264254:Gto*;                                                       | + | GtoT  | 0.1429 | 0.4286 | 8  | 6 | [12,19]   |
| chr2:100549417  | PDCL3   | coding_exon |                                                                             | + | AttoG | 0.1111 | 0.3077 | 6  | 2 | [13,45]   |
| chr2:100552520  | PDCL3   | coding_exon |                                                                             | + | CtoT  | 0.25   | 0.4286 | 3  | 2 | [12,14]   |
| chr2:100552577  | PDCL3   | coding_exon |                                                                             | + | CtoT  | 0.2    | 0.5789 | 3  | 2 | [19,20]   |
| chr2:100554670  | PDCL3   | coding_exon |                                                                             | + | CtoT  | 0.1    | 0.2083 | 6  | 3 | [20,64]   |
| chr2:100559288  | PDCL3   | coding_exon |                                                                             | + | AttoG | 0.1212 | 0.6316 | 11 | 5 | [19,46]   |
| chr2:100559378  | PDCL3   | coding_exon |                                                                             | + | CtoT  | 0.1111 | 0.1212 | 2  | 2 | [33,54]   |
| chr2:100559401  | PDCL3   | UTR3        |                                                                             | + | TtoG  | 0.1    | 0.2143 | 7  | 4 | [13,48]   |
| chr11:760217    | PDDC1   | mixed       |                                                                             | - | TtoC  | 0.1    | 0.1429 | 3  | 2 | [10,14]   |
| chr3:57518140   | PDE12   | coding_exon | ENST00000311180:QtoE;ENST00000487257:QtoE;                                  | + | CtoG  | 0.1    | 0.1    | 2  | 2 | [10,10]   |
| chr19:10441251  | PDE4A   | UTR3        |                                                                             | + | TtoC  | 0.1    | 0.1    | 4  | 2 | [10,10]   |
| chr8:66793024   | PDE7A   | UTR3        |                                                                             | - | AttoG | 0.1111 | 0.2222 | 10 | 2 | [18,27]   |
| chr8:66793332   | PDE7A   | UTR3        |                                                                             | - | GtoA  | 0.1053 | 0.1111 | 3  | 2 | [18,19]   |
| chr8:66793334   | PDE7A   | UTR3        |                                                                             | - | GtoA  | 0.1111 | 0.125  | 3  | 2 | [16,18]   |
| chr15:83482585  | PDE8A   | UTR3        |                                                                             | + | CtoA  | 0.1    | 0.125  | 3  | 2 | [10,16]   |
| chr11:34962769  | PDHX    | coding_exon | ENST00000227868:VtoG;ENST00000430469:VtoG;ENST00000448838:VtoG;             | + | TtoG  | 0.1538 | 0.2    | 2  | 2 | [10,13]   |
| chr11:34944833  | PDHX    | coding_exon | ENST00000227868:TtoP;ENST00000448838:TtoP;                                  | + | AttoC | 0.1538 | 0.24   | 5  | 5 | [10,25]   |
| chr2:10860095   | PDI A6  | coding_exon | ENST00000272227:VtoL;ENST00000381611:VtoL;ENST00000404371:VtoL;ENST000      | - | GtoT  | 0.1067 | 0.1809 | 8  | 4 | [18,94]   |
| chr2:10864997   | PDI A6  | coding_exon | ENST00000272227:VtoG;ENST00000381611:VtoG;ENST00000404371:VtoG;ENST000      | - | TtoG  | 0.1062 | 0.1458 | 7  | 4 | [48,139]  |
| chr10:96987579  | PD LIM1 | UTR3        |                                                                             | - | TtoC  | 0.4489 | 0.529  | 2  | 2 | [483,499] |
| chr16:2589019   | PDPK1   | UTR3        |                                                                             | + | TtoC  | 0.1    | 0.1    | 3  | 2 | [10,10]   |



|                 |         |             |                                                                         |   |      |        |        |    |    |            |
|-----------------|---------|-------------|-------------------------------------------------------------------------|---|------|--------|--------|----|----|------------|
| chr16:68751371  | PDPR    | UTR3        |                                                                         | + | CtoT | 0.1    | 0.1538 | 4  | 4  | [10,24]    |
| chr16:68751935  | PDPR    | UTR3        |                                                                         | + | AtaG | 0.1    | 0.1176 | 3  | 2  | [10,17]    |
| chr16:68752188  | PDPR    | UTR3        |                                                                         | + | GtoT | 0.1667 | 0.2414 | 6  | 3  | [18,29]    |
| chr20:29996986  | PDRG1   | UTR3        |                                                                         | - | TtoG | 0.1176 | 0.1538 | 4  | 3  | [13,34]    |
| chr20:29996992  | PDRG1   | UTR3        |                                                                         | - | TtoG | 0.1379 | 0.25   | 7  | 3  | [14,34]    |
| chr4:39527662   | PD55A   | coding_exon | ENST00000303538:LtoQ;ENST00000412404:LtoQ;                              | - | TtoA | 0.1818 | 0.1818 | 8  | 2  | [11,12]    |
| chr4:39580434   | PD55A   | coding_exon | ENST00000303538:HtoR;ENST00000412404:HtoR;                              | - | AtaG | 0.1053 | 0.1667 | 4  | 2  | [12,19]    |
| chr4:39515894   | PD55A   | coding_exon |                                                                         | - | AtaG | 0.1111 | 0.1333 | 3  | 2  | [15,18]    |
| chr4:39582177   | PD55A   | coding_exon |                                                                         | - | TtoC | 0.1053 | 0.2    | 6  | 3  | [10,38]    |
| chr4:39501007   | PD55A   | UTR3        |                                                                         | - | TtoG | 0.1    | 0.1579 | 4  | 4  | [10,19]    |
| chr4:39502887   | PD55A   | UTR3        |                                                                         | - | TtoC | 0.1818 | 0.3    | 9  | 2  | [10,11]    |
| chr10:27052851  | PD55X   | coding_exon |                                                                         | + | TtoC | 0.1    | 0.1    | 2  | 2  | [10,11]    |
| chr21:44005989  | PDXK    | UTR3        |                                                                         | + | TtoC | 0.1    | 0.1    | 2  | 2  | [10,10]    |
| chr21:44005999  | PDXK    | UTR3        |                                                                         | + | AtaG | 0.1    | 0.125  | 4  | 3  | [10,16]    |
| chr10:119033429 | PDZD8   | coding_exon |                                                                         | - | AtaG | 0.1    | 0.1    | 2  | 2  | [10,10]    |
| chr12:117067768 | PEBP1   | UTR3        |                                                                         | + | AtaG | 0.1429 | 0.3    | 2  | 2  | [10,14]    |
| chr2:216612298  | PECR    | mixed       |                                                                         | - | AtaC | 0.1    | 0.1053 | 3  | 2  | [10,19]    |
| chr2:64181136   | PEL1    | coding_exon | ENST00000358912:AtaV;                                                   | - | CtoT | 0.1429 | 0.3    | 5  | 2  | [10,14]    |
| chr2:64174340   | PEL1    | UTR3        |                                                                         | - | TtoC | 0.1    | 0.1429 | 3  | 2  | [10,14]    |
| chr5:52132305   | PELO    | coding_exon | ENST00000274311:NtoT;ENST00000381463:NtoT;                              | + | AtaC | 0.1    | 0.3125 | 5  | 3  | [10,16]    |
| chr17:17353516  | PEMT    | coding_exon | ENST00000255389:MtoV;ENST00000343219:MtoV;ENST00000395781:MtoV;ENST     | - | AtaG | 0.125  | 0.1429 | 3  | 2  | [14,16]    |
| chr17:7984943   | PER1    | UTR3        |                                                                         | - | TtoG | 0.1    | 0.1    | 2  | 2  | [10,20]    |
| chr4:152820417  | PET112L | coding_exon | ENST00000263985:Qto*;                                                   | - | CtoT | 0.1429 | 0.25   | 2  | 2  | [12,14]    |
| chr15:88027517  | PEX11A  | UTR3        |                                                                         | - | TtoA | 0.1    | 0.1    | 2  | 2  | [10,10]    |
| chr2:61129178   | PEX13   | coding_exon |                                                                         | + | TtoC | 0.1    | 0.2143 | 2  | 2  | [10,14]    |
| chr1:10612870   | PEX14   | UTR3        |                                                                         | + | GtoC | 0.1    | 0.1    | 2  | 2  | [10,10]    |
| chr1:158514053  | PEX19   | UTR3        |                                                                         | - | AtaG | 0.125  | 0.1667 | 4  | 2  | [12,16]    |
| chr1:158514895  | PEX19   | UTR3        |                                                                         | - | GtoA | 0.1    | 0.1818 | 2  | 2  | [10,11]    |
| chr22:16950857  | PEX26   | mixed       |                                                                         | + | AtaC | 0.1    | 0.1538 | 6  | 2  | [10,13]    |
| chr22:16952021  | PEX26   | UTR3        |                                                                         | + | AtaG | 0.1053 | 0.1176 | 4  | 2  | [17,19]    |
| chr22:16952235  | PEX26   | UTR3        |                                                                         | + | AtaC | 0.1111 | 0.1212 | 4  | 2  | [27,33]    |
| chr22:16953508  | PEX26   | UTR3        |                                                                         | + | AtaG | 0.1    | 0.1538 | 6  | 2  | [10,13]    |
| chr22:16953514  | PEX26   | UTR3        |                                                                         | + | TtoA | 0.1    | 0.1538 | 4  | 2  | [10,13]    |
| chr22:16953774  | PEX26   | UTR3        |                                                                         | + | AtaG | 0.1    | 0.2    | 3  | 2  | [10,10]    |
| chr12:7253657   | PEX5    | coding_exon | ENST00000266563:StoP;ENST00000266564:StoP;ENST00000396637:StoP;ENST000  | + | TtoC | 0.1111 | 0.1176 | 3  | 2  | [18,18]    |
| chr6:137232763  | PEX7    | coding_exon | ENST00000318471:WtoR;                                                   | + | TtoC | 0.1    | 0.1667 | 2  | 2  | [10,12]    |
| chr6:137232828  | PEX7    | coding_exon | ENST00000318471:RtoS;                                                   | + | GtoT | 0.1    | 0.1    | 2  | 2  | [10,10]    |
| chr17:8109640   | PFAS    | coding_exon | ENST00000314666:TtoP;                                                   | + | AtaC | 0.1    | 0.2    | 5  | 2  | [10,20]    |
| chr17:8098256   | PFAS    | coding_exon | ENST00000314666:FtoV;                                                   | + | TtoG | 0.1176 | 0.15   | 7  | 2  | [17,20]    |
| chr17:8109069   | PFAS    | coding_exon | ENST00000314666:EtoD;                                                   | + | AtaC | 0.1053 | 0.1429 | 4  | 2  | [14,19]    |
| chr17:8097989   | PFAS    | coding_exon |                                                                         | + | AtaG | 0.1    | 0.1    | 2  | 2  | [10,20]    |
| chr1:159337058  | PFDN2   | UTR3        |                                                                         | - | AtaG | 0.1    | 0.3333 | 11 | 9  | [10,26]    |
| chr12:51979496  | PFDN5   | UTR3        |                                                                         | + | GtoA | 0.1    | 0.1026 | 7  | 2  | [10,39]    |
| chr10:6308237   | PFKFB3  | mixed       |                                                                         | + | AtaG | 0.1    | 0.1    | 2  | 2  | [10,10]    |
| chr10:6315310   | PFKFB3  | UTR3        |                                                                         | + | TtoC | 0.1    | 0.1364 | 6  | 4  | [10,22]    |
| chr10:6317003   | PFKFB3  | UTR3        |                                                                         | + | TtoC | 0.1    | 0.2    | 2  | 2  | [10,10]    |
| chr10:6317403   | PFKFB3  | UTR3        |                                                                         | + | TtoC | 0.1053 | 0.125  | 3  | 2  | [16,19]    |
| chr3:48530153   | PFKFB4  | UTR3        |                                                                         | - | CtoG | 0.1333 | 0.1538 | 2  | 2  | [13,15]    |
| chr21:44571677  | PFKL    | UTR3        |                                                                         | + | TtoC | 0.1053 | 0.2545 | 14 | 9  | [19,81]    |
| chr21:44571683  | PFKL    | UTR3        |                                                                         | + | GtoA | 0.3    | 0.7    | 6  | 6  | [10,23]    |
| chr12:46814320  | PFKM    | coding_exon | ENST00000340802:HtoR;ENST00000359794:HtoR;ENST00000395233:HtoR;         | + | AtaG | 0.1    | 0.1538 | 4  | 2  | [13,20]    |
| chr12:46825818  | PFKM    | UTR3        |                                                                         | + | TtoC | 0.1    | 0.2083 | 11 | 5  | [13,37]    |
| chr10:3168993   | PFKP    | coding_exon |                                                                         | + | AtaC | 0.1667 | 0.1818 | 4  | 2  | [11,13]    |
| chr10:3168971   | PFKP    | mixed       |                                                                         | + | TtoA | 0.1071 | 0.381  | 6  | 6  | [28,56]    |
| chr17:4789784   | PFN1    | UTR3        |                                                                         | - | CtoA | 0.987  | 0.9995 | 12 | 12 | [733,3188] |
| chr11:3801714   | PGAP2   | coding_exon | ENST00000278243:StoI;ENST00000300730:StoI;ENST0000039686:StoI;ENST00000 | + | GtoT | 0.1818 | 0.1818 | 2  | 2  | [11,11]    |
| chr11:3803510   | PGAP2   | UTR3        |                                                                         | + | GtoT | 0.1538 | 0.4    | 2  | 2  | [10,13]    |
| chr1:10395757   | PGD     | coding_exon | ENST00000270776:TtoP;                                                   | + | AtaC | 0.1042 | 0.1299 | 4  | 2  | [77,96]    |
| chr1:10402646   | PGD     | UTR3        |                                                                         | + | TtoG | 0.1053 | 0.125  | 2  | 2  | [89,115]   |
| chr19:17489563  | PGL5    | coding_exon |                                                                         | + | AtaC | 0.1212 | 0.1731 | 5  | 2  | [52,66]    |
| chr4:37517868   | PGM2    | coding_exon | ENST00000381967:FtoI;                                                   | + | TtoA | 0.1176 | 0.1176 | 4  | 2  | [17,18]    |
| chr16:2203740   | PGP     | coding_exon | ENST00000333503:LtoH;                                                   | - | TtoA | 0.125  | 0.2222 | 2  | 2  | [10,16]    |
| chr19:18337948  | PGPEP1  | UTR3        |                                                                         | + | AtaG | 0.1    | 0.1333 | 8  | 3  | [10,17]    |
| chr19:18337979  | PGPEP1  | UTR3        |                                                                         | + | AtaC | 0.1    | 0.125  | 2  | 2  | [10,16]    |
| chr19:18340609  | PGPEP1  | UTR3        |                                                                         | + | TtoC | 0.1    | 0.1053 | 3  | 2  | [10,19]    |
| chr19:18340869  | PGPEP1  | UTR3        |                                                                         | + | GtoA | 0.1    | 0.1    | 2  | 2  | [10,10]    |
| chr19:18340916  | PGPEP1  | UTR3        |                                                                         | + | TtoG | 0.1    | 0.1154 | 2  | 2  | [20,26]    |
| chr4:129411749  | PGRM2   | UTR3        |                                                                         | - | GtoT | 0.1    | 0.1    | 2  | 2  | [10,10]    |
| chr17:73911735  | PGS1    | coding_exon | ENST00000262764:WtoR;ENST00000329897:WtoR;ENST00000335081:WtoR;         | + | TtoC | 0.1    | 0.1    | 2  | 2  | [10,10]    |
| chr17:73911611  | PGS1    | coding_exon | ENST00000262764:NtoK;ENST00000329897:NtoK;ENST00000335081:NtoK;         | + | TtoA | 0.1    | 0.1    | 2  | 2  | [10,10]    |
| chr1:28679556   | PHACTR4 | coding_exon | ENST00000373836:LtoP;ENST00000373837:LtoP;ENST00000373839:LtoP;         | + | TtoC | 0.1    | 0.15   | 6  | 2  | [10,20]    |
| chr1:28665553   | PHACTR4 | coding_exon |                                                                         | + | TtoC | 0.1    | 0.1    | 3  | 2  | [10,10]    |
| chr1:28697361   | PHACTR4 | UTR3        |                                                                         | + | AtaG | 0.1    | 0.2353 | 10 | 6  | [17,32]    |
| chr5:125988538  | PHAX    | UTR3        |                                                                         | + | TtoC | 0.1    | 0.1    | 2  | 2  | [10,10]    |
| chr17:44845585  | PHB     | coding_exon | ENST00000300408:LtoP;ENST00000393345:LtoP;ENST00000434917:LtoP;         | - | TtoC | 0.1111 | 0.3    | 8  | 6  | [10,19]    |
| chr17:44845601  | PHB     | coding_exon | ENST00000300408:ItaV;ENST00000393345:ItaV;ENST00000434917:ItaV;         | - | AtaG | 0.1154 | 0.1176 | 5  | 2  | [17,26]    |
| chr17:44845547  | PHB     | coding_exon |                                                                         | - | TtoC | 0.1    | 0.1053 | 6  | 3  | [10,19]    |
| chr17:44845581  | PHB     | coding_exon |                                                                         | - | CtoG | 0.1    | 0.2    | 6  | 3  | [10,16]    |
| chr17:44847228  | PHB     | UTR5        |                                                                         | - | GtoT | 0.125  | 0.1667 | 5  | 2  | [12,16]    |
| chr1:33561980   | PHC2    | UTR3        |                                                                         | - | GtoT | 0.1    | 0.1818 | 2  | 2  | [10,11]    |
| chr3:171293617  | PHC3    | UTR3        |                                                                         | - | TtoA | 0.1    | 0.1    | 2  | 2  | [10,10]    |
| chr6:33490098   | PHF1    | coding_exon | ENST00000374512:WtoR;ENST00000374516:WtoR;                              | + | TtoC | 0.1    | 0.1111 | 3  | 2  | [10,18]    |
| chr6:33488541   | PHF1    | mixed       |                                                                         | + | TtoC | 0.1    | 0.1111 | 3  | 2  | [10,18]    |
| chr6:33492045   | PHF1    | UTR3        |                                                                         | + | TtoC | 0.1    | 0.1875 | 3  | 2  | [10,16]    |
| chr6:169846442  | PHF10   | coding_exon |                                                                         | - | TtoA | 0.1    | 0.1    | 2  | 2  | [10,10]    |
| chr5:133942351  | PHF15   | mixed       |                                                                         | + | AtaC | 0.1176 | 0.1176 | 3  | 2  | [17,17]    |
| chr4:130002450  | PHF17   | coding_exon | ENST00000226319:EtoK;ENST00000413543:EtoK;ENST00000452328:EtoK;         | + | GtoA | 0.1    | 0.1538 | 2  | 2  | [10,13]    |
| chr4:130002324  | PHF17   | coding_exon | ENST00000226319:CtoR;ENST00000413543:CtoR;ENST00000452328:CtoR;         | + | TtoC | 0.1    | 0.1    | 3  | 2  | [10,20]    |
| chr9:122671928  | PHF19   | coding_exon | ENST00000312189:StoP;                                                   | - | TtoC | 0.1429 | 0.2105 | 4  | 2  | [14,19]    |
| chr9:122676671  | PHF19   | coding_exon | ENST00000312189:LtoP;ENST00000373896:LtoP;                              | - | TtoC | 0.1067 | 0.1356 | 9  | 2  | [59,75]    |
| chr9:122671717  | PHF19   | mixed       |                                                                         | - | AtaG | 0.1429 | 0.1818 | 3  | 2  | [11,14]    |
| chr9:122657824  | PHF19   | UTR3        |                                                                         | - | TtoC | 0.1667 | 0.1667 | 2  | 2  | [12,12]    |
| chr20:33922362  | PHF20   | mixed       |                                                                         | + | TtoC | 0.1    | 0.1333 | 3  | 2  | [10,15]    |
| chr20:34000070  | PHF20   | UTR3        |                                                                         | + | TtoA | 0.1    | 0.1111 | 3  | 2  | [10,10]    |
| chr20:34000697  | PHF20   | UTR3        |                                                                         | + | TtoC | 0.1    | 0.2727 | 10 | 4  | [10,17]    |
| chr8:133875902  | PHF20L1 | coding_exon | ENST00000315808:WtoR;ENST00000337920:WtoR;ENST00000361997:WtoR;ENST     | + | TtoC | 0.1    | 0.1333 | 3  | 2  | [10,16]    |

|                |         |             |                                                                                      |   |      |        |        |    |    |          |
|----------------|---------|-------------|--------------------------------------------------------------------------------------|---|------|--------|--------|----|----|----------|
| chr11:45947950 | PHF21A  | coding_exon | ENST00000257821:Totl;ENST00000323180:Totl;ENST00000418153:Totl;                      | - | CtoA | 0.1    | 0.1    | 2  | 2  | [10,10]  |
| chr11:45910861 | PHF21A  | UTR3        |                                                                                      | - | TtoC | 0.1429 | 0.2143 | 7  | 3  | [11,14]  |
| chr11:45911459 | PHF21A  | UTR3        |                                                                                      | - | AtoC | 0.1364 | 0.2222 | 6  | 3  | [18,33]  |
| chr6:64480005  | PHF3    | coding_exon | ENST00000262043:KtoR;ENST00000393387:KtoR;                                           | + | AtoG | 0.1    | 0.1    | 3  | 2  | [10,10]  |
| chr6:64459669  | PHF3    | coding_exon | ENST00000262043:GtoD;ENST00000393387:GtoD;                                           | + | GtoA | 0.1    | 0.1    | 2  | 2  | [10,10]  |
| chr6:64459745  | PHF3    | coding_exon | ENST00000262043:DtoE;ENST00000393387:DtoE;                                           | + | TtoA | 0.1    | 0.1    | 2  | 2  | [10,10]  |
| chr6:64452497  | PHF3    | coding_exon |                                                                                      | + | TtoC | 0.1    | 0.1111 | 2  | 2  | [10,18]  |
| chr6:64480006  | PHF3    | coding_exon |                                                                                      | + | GtoA | 0.1    | 0.1818 | 3  | 2  | [10,11]  |
| chr6:79707330  | PHIP    | coding_exon | ENST00000275034:EtaD;                                                                | - | GtoT | 0.1    | 0.1    | 3  | 2  | [10,20]  |
| chr6:79768393  | PHIP    | mixed       |                                                                                      | - | TtoC | 0.1333 | 0.1364 | 5  | 2  | [15,22]  |
| chr6:79770294  | PHIP    | mixed       |                                                                                      | - | AtoG | 0.1    | 0.2727 | 10 | 4  | [10,19]  |
| chr9:138863384 | PHPT1   | UTR5        |                                                                                      | + | CtoG | 0.1667 | 0.2308 | 4  | 2  | [13,18]  |
| chr9:138863463 | PHPT1   | UTR5        |                                                                                      | + | TtoC | 0.1    | 0.1538 | 2  | 2  | [10,13]  |
| chr11:598595   | PHRF1   | coding_exon | ENST00000264555:StoP;ENST00000413872:StoP;ENST00000416188:StoP;                      | + | TtoC | 0.1    | 0.1667 | 3  | 2  | [10,12]  |
| chr11:599652   | PHRF1   | coding_exon | ENST00000264555:LtoP;ENST00000413872:LtoP;ENST00000416188:LtoP;                      | + | TtoC | 0.1    | 0.1    | 2  | 2  | [10,10]  |
| chr7:7369034   | PHTF2   | coding_exon |                                                                                      | + | AtoG | 0.1    | 0.1    | 2  | 2  | [10,10]  |
| chr4:24888547  | PI4K2B  | UTR3        |                                                                                      | + | CtoT | 0.1    | 0.1    | 2  | 2  | [10,10]  |
| chr22:19445639 | PI4KA   | mixed       |                                                                                      | - | TtoG | 0.1    | 0.1333 | 4  | 2  | [10,15]  |
| chr1:149555149 | PI4KB   | mixed       |                                                                                      | - | AtoG | 0.1    | 0.1429 | 3  | 2  | [20,21]  |
| chr1:149565402 | PI4KB   | UTR5        |                                                                                      | - | TtoG | 0.1    | 0.1    | 3  | 2  | [10,10]  |
| chr15:66267027 | PIAS1   | coding_exon | ENST00000249636:StoA;                                                                | + | TtoG | 0.1    | 0.1053 | 3  | 2  | [10,19]  |
| chr15:66253125 | PIAS1   | coding_exon | ENST00000249636:LtoH;                                                                | + | TtoA | 0.1    | 0.1538 | 4  | 2  | [10,13]  |
| chr15:66253251 | PIAS1   | coding_exon | ENST00000249636:KtoM;                                                                | + | AtoT | 0.1    | 0.1    | 2  | 2  | [10,10]  |
| chr18:42663735 | PIAS2   | coding_exon |                                                                                      | - | AtoG | 0.1    | 0.125  | 3  | 2  | [10,16]  |
| chr18:42724626 | PIAS2   | coding_exon |                                                                                      | - | AtoG | 0.1    | 0.1667 | 2  | 2  | [10,12]  |
| chr1:144289547 | PIAS3   | coding_exon |                                                                                      | + | TtoC | 0.1    | 0.1    | 3  | 2  | [10,10]  |
| chr11:85347686 | PICALM  | UTR3        |                                                                                      | - | AtoG | 0.1429 | 0.2    | 3  | 2  | [10,14]  |
| chr22:36801064 | PICK1   | coding_exon |                                                                                      | + | TtoG | 0.1    | 0.1    | 4  | 2  | [10,10]  |
| chr15:62899222 | PIF1    | coding_exon | ENST00000268043:TtoP;ENST00000333425:TtoP;                                           | - | AtoC | 0.1    | 0.1    | 2  | 2  | [10,10]  |
| chr15:62899235 | PIF1    | coding_exon | ENST00000268043:CtoW;ENST00000333425:CtoW;                                           | - | TtoG | 0.1176 | 0.1429 | 4  | 3  | [14,21]  |
| chr15:62897198 | PIF1    | coding_exon |                                                                                      | - | AtoG | 0.1765 | 0.2    | 4  | 2  | [10,17]  |
| chr4:491339    | PIGG    | coding_exon | ENST00000296306:MtoK;ENST00000310340:MtoK;ENST00000453061:MtoK;ENST00000310340:RtoG; | + | TtoA | 0.1    | 0.1111 | 2  | 2  | [10,10]  |
| chr14:67136571 | PIGH    | coding_exon | ENST00000216452:RtoG;                                                                | - | CtoG | 0.1818 | 0.7143 | 3  | 3  | [10,14]  |
| chr14:67126614 | PIGH    | coding_exon | ENST00000216452:IttoT;                                                               | - | TtoC | 0.1333 | 0.2    | 6  | 2  | [15,15]  |
| chr14:67129153 | PIGH    | coding_exon |                                                                                      | - | AtoG | 0.1538 | 0.2    | 4  | 2  | [10,13]  |
| chr14:67136521 | PIGH    | coding_exon |                                                                                      | - | GtoA | 0.2727 | 0.2727 | 2  | 2  | [11,11]  |
| chr14:67126071 | PIGH    | UTR3        |                                                                                      | - | TtoC | 0.1053 | 0.1538 | 3  | 2  | [13,19]  |
| chr14:67126403 | PIGH    | UTR3        |                                                                                      | - | TtoA | 0.1    | 0.2143 | 7  | 2  | [10,14]  |
| chr14:67126431 | PIGH    | UTR3        |                                                                                      | - | GtoA | 0.1579 | 0.1923 | 2  | 2  | [19,26]  |
| chr17:16170116 | PIGL    | UTR3        |                                                                                      | + | GtoA | 0.1    | 0.1111 | 2  | 2  | [10,18]  |
| chr18:57864117 | PIGN    | coding_exon |                                                                                      | - | AtoG | 0.1    | 0.1    | 2  | 2  | [10,10]  |
| chr17:23904783 | PIGS    | UTR3        |                                                                                      | - | AtoT | 0.12   | 0.1212 | 2  | 2  | [25,33]  |
| chr10:98370163 | PIK3AP1 | coding_exon | ENST00000339364:VtoG;ENST00000371109:VtoG;ENST00000371110:VtoG;                      | - | TtoG | 0.1    | 0.125  | 3  | 2  | [16,31]  |
| chr10:98370217 | PIK3AP1 | coding_exon | ENST00000339364:LtoR;ENST00000371109:LtoR;ENST00000371110:LtoR;                      | - | TtoG | 0.1    | 0.1    | 2  | 2  | [10,10]  |
| chr1:202679305 | PIK3C2B | coding_exon | ENST00000367187:YtoN;                                                                | - | TtoA | 0.1    | 0.1    | 3  | 2  | [10,10]  |
| chr1:202691743 | PIK3C2B | coding_exon | ENST00000367187:AtoA;                                                                | - | AtoG | 0.1    | 0.1    | 2  | 2  | [10,10]  |
| chr18:37901393 | PIK3C3  | coding_exon | ENST00000262039:VtoG;ENST00000398870:VtoG;                                           | + | TtoG | 0.1    | 0.3077 | 7  | 6  | [10,16]  |
| chr18:37849439 | PIK3C3  | coding_exon | ENST00000262039:StoP;ENST00000398870:StoP;                                           | + | TtoC | 0.1    | 0.1111 | 3  | 2  | [10,18]  |
| chr18:3791590  | PIK3C3  | coding_exon |                                                                                      | + | AtoG | 0.1    | 0.2    | 3  | 3  | [10,12]  |
| chr18:37877697 | PIK3C3  | coding_exon |                                                                                      | + | CtoT | 0.1    | 0.1    | 2  | 2  | [10,10]  |
| chr5:67629170  | PIK3R1  | coding_exon |                                                                                      | + | AtoG | 0.1    | 0.1    | 2  | 2  | [10,10]  |
| chr5:67632835  | PIK3R1  | UTR3        |                                                                                      | + | GtoA | 0.1    | 0.1176 | 2  | 2  | [10,17]  |
| chr5:67632909  | PIK3R1  | UTR3        |                                                                                      | + | AtoG | 0.1429 | 0.3125 | 4  | 3  | [12,16]  |
| chr19:18141408 | PIK3R2  | UTR3        |                                                                                      | + | TtoG | 0.1    | 0.1    | 2  | 2  | [10,10]  |
| chr1:46294126  | PIK3R3  | coding_exon | ENST00000262741:EtaG;ENST00000340332:EtaG;ENST00000372006:EtaG;ENST00000262741:EtaG; | - | AtoG | 0.1    | 0.1538 | 2  | 2  | [10,13]  |
| chr1:46279215  | PIK3R3  | UTR3        |                                                                                      | - | AtoG | 0.1    | 0.1333 | 8  | 2  | [10,15]  |
| chr1:46281458  | PIK3R3  | UTR3        |                                                                                      | - | TtoC | 0.1    | 0.1333 | 2  | 2  | [10,15]  |
| chr3:131882583 | PIK3R4  | coding_exon | ENST00000356763:VtoA;                                                                | - | TtoC | 0.1111 | 0.1538 | 5  | 3  | [13,18]  |
| chr3:131881018 | PIK3R4  | coding_exon | ENST00000356763:EtaG;                                                                | - | AtoG | 0.1    | 0.1    | 2  | 2  | [10,20]  |
| chr17:8734072  | PIK3R5  | coding_exon | ENST00000269300:WtoG;ENST00000444598:WtoG;ENST00000447110:WtoG;                      | - | TtoG | 0.1    | 0.1    | 2  | 2  | [10,10]  |
| chr17:8722997  | PIK3R5  | UTR3        |                                                                                      | - | AtoG | 0.1176 | 0.3333 | 5  | 3  | [12,17]  |
| chr17:8665945  | PIK3R6  | coding_exon | ENST00000311434:VtoF;ENST00000434064:VtoF;                                           | - | GtoT | 0.125  | 0.16   | 6  | 6  | [16,40]  |
| chr17:8665936  | PIK3R6  | coding_exon | ENST00000311434:RtoL;ENST00000434064:RtoL;                                           | - | GtoT | 0.1    | 0.2955 | 6  | 2  | [20,44]  |
| chr6:37249811  | PIM1    | mixed       |                                                                                      | + | AtoC | 0.1    | 0.1    | 2  | 2  | [10,10]  |
| chr6:37249967  | PIM1    | UTR3        |                                                                                      | + | AtoG | 0.1    | 0.1667 | 3  | 2  | [10,12]  |
| chr6:37250314  | PIM1    | UTR3        |                                                                                      | + | TtoC | 0.1    | 0.1    | 2  | 2  | [10,10]  |
| chr6:37250504  | PIM1    | UTR3        |                                                                                      | + | TtoA | 0.1    | 0.3    | 6  | 4  | [10,16]  |
| chr6:37250505  | PIM1    | UTR3        |                                                                                      | + | GtoT | 0.1176 | 0.2    | 4  | 3  | [10,17]  |
| chr22:48743697 | PIM3    | UTR3        |                                                                                      | + | TtoC | 0.15   | 0.2    | 3  | 2  | [10,20]  |
| chr22:48743698 | PIM3    | UTR3        |                                                                                      | + | AtoG | 0.1667 | 0.2308 | 3  | 3  | [12,21]  |
| chr12:56281857 | PIP4K2C | UTR3        |                                                                                      | + | AtoG | 0.1    | 0.1667 | 3  | 2  | [10,12]  |
| chr1:149481621 | PIP5K1A | coding_exon |                                                                                      | + | AtoG | 0.2    | 0.5294 | 3  | 2  | [10,17]  |
| chr1:149437985 | PIP5K1A | UTR5        |                                                                                      | + | TtoC | 0.1    | 0.1429 | 4  | 2  | [10,14]  |
| chr19:3581290  | PIP5K1C | mixed       |                                                                                      | - | AtoC | 0.1    | 0.1    | 3  | 2  | [20,30]  |
| chr19:3581485  | PIP5K1C | mixed       |                                                                                      | - | TtoC | 0.1    | 0.2    | 4  | 2  | [10,10]  |
| chr19:3593910  | PIP5K1C | mixed       |                                                                                      | - | TtoG | 0.1    | 0.1    | 2  | 2  | [10,10]  |
| chr10:22863909 | PIP5K2A | UTR3        |                                                                                      | - | TtoC | 0.1    | 0.1429 | 6  | 2  | [10,15]  |
| chr17:34209055 | PIP5K2B | coding_exon | ENST00000269554:VtoA;                                                                | - | TtoC | 0.1    | 0.1818 | 3  | 2  | [10,11]  |
| chr17:1403186  | PITPNA  | coding_exon | ENST00000313486:VtoA;                                                                | - | TtoC | 0.1    | 0.2    | 5  | 2  | [10,20]  |
| chr17:1369181  | PITPNA  | UTR3        |                                                                                      | - | AtoT | 0.1    | 0.1    | 2  | 2  | [10,10]  |
| chr22:26578453 | PITPNB  | UTR3        |                                                                                      | - | AtoG | 0.1111 | 0.1351 | 4  | 2  | [27,37]  |
| chr11:67021280 | PITPNM1 | coding_exon | ENST00000356404:EtaA;ENST00000436757:EtaA;                                           | - | AtoC | 0.1    | 0.12   | 4  | 2  | [10,25]  |
| chr11:67021279 | PITPNM1 | coding_exon |                                                                                      | - | GtoA | 0.1034 | 0.125  | 3  | 2  | [16,29]  |
| chr10:3177869  | PITRM1  | coding_exon |                                                                                      | - | AtoG | 0.1    | 0.1    | 2  | 2  | [10,10]  |
| chr10:3198510  | PITRM1  | mixed       |                                                                                      | - | TtoC | 0.1    | 0.125  | 2  | 2  | [16,20]  |
| chr10:3170113  | PITRM1  | UTR3        |                                                                                      | - | TtoC | 0.1    | 0.125  | 2  | 2  | [16,20]  |
| chr5:108699624 | PJA2    | UTR3        |                                                                                      | - | TtoC | 0.1    | 0.3333 | 4  | 3  | [11,20]  |
| chr16:2078887  | PKD1    | UTR3        |                                                                                      | - | TtoC | 0.1    | 0.125  | 2  | 2  | [16,40]  |
| chr8:110608245 | PKHD1L1 | coding_exon | ENST00000378402:TtoA;ENST00000426474:TtoA;                                           | + | AtoG | 0.1    | 0.1    | 2  | 2  | [10,10]  |
| chr15:70278424 | PKM2    | UTR3        |                                                                                      | - | CtoA | 0.2025 | 1      | 8  | 8  | [10,84]  |
| chr15:70278425 | PKM2    | UTR3        |                                                                                      | - | CtoA | 0.2576 | 0.9412 | 18 | 18 | [11,137] |
| chr15:70278426 | PKM2    | UTR3        |                                                                                      | - | AtoG | 0.1154 | 0.2885 | 20 | 12 | [17,52]  |
| chr16:2961341  | PKMYT1  | coding_exon |                                                                                      | - | CtoA | 0.1    | 0.1    | 2  | 2  | [10,10]  |
| chr16:2962666  | PKMYT1  | coding_exon |                                                                                      | - | GtoA | 1      | 1      | 6  | 6  | [10,18]  |
| chr3:120831052 | PLA1A   | UTR3        |                                                                                      | + | GtoT | 0.1034 | 0.2    | 4  | 2  | [10,29]  |
| chr22:36841566 | PLA2G6  | mixed       |                                                                                      | - | TtoC | 0.1    | 0.1176 | 2  | 2  | [10,17]  |

|                 |         |             |                                                                                          |   |      |        |        |    |   |          |
|-----------------|---------|-------------|------------------------------------------------------------------------------------------|---|------|--------|--------|----|---|----------|
| chr4:84234882   | PLAC8   | coding_exon | ENST00000311507:RtoS;ENST00000411416:RtoS;ENST00000426923:RtoS;                          | - | AtoT | 0.1    | 0.1333 | 3  | 2 | [10,15]  |
| chr4:84254887   | PLAC8   | UTR5        |                                                                                          | - | CtoT | 0.1    | 0.1333 | 2  | 2 | [10,15]  |
| chr15:38374498  | PLCB2   | coding_exon | ENST00000260402:StoP;ENST00000456256:StoP;                                               | - | TtoC | 0.1    | 0.1538 | 3  | 2 | [10,13]  |
| chr15:38372436  | PLCB2   | coding_exon | ENST00000260402:ItotN;ENST00000456256:ItotN;                                             | - | TtoA | 0.1    | 0.1    | 2  | 2 | [10,10]  |
| chr15:38367645  | PLCB2   | UTR3        |                                                                                          | - | AtoG | 0.1    | 0.1538 | 2  | 2 | [10,13]  |
| chr3:17106607   | PLCL2   | UTR3        |                                                                                          | + | AtoG | 0.1154 | 0.1818 | 2  | 2 | [11,26]  |
| chr8:145064465  | PLEC1   | coding_exon | ENST00000322810:StoA;ENST00000345136:StoA;ENST00000354589:StoA;ENST00000354589:StoA;     | - | TtoG | 0.1    | 0.1    | 2  | 2 | [10,10]  |
| chr8:145068731  | PLEC1   | coding_exon | ENST00000322810:ItotL;ENST00000345136:ItotL;ENST00000354589:ItotL;ENST00000354589:ItotL; | - | AtoC | 0.1    | 0.1    | 3  | 2 | [10,10]  |
| chr8:145061375  | PLEC1   | UTR3        |                                                                                          | - | AtoG | 0.1    | 0.1    | 2  | 2 | [10,10]  |
| chr8:38949459   | PLEKHA2 | UTR3        |                                                                                          | + | AtoT | 0.1818 | 0.2    | 4  | 3 | [10,27]  |
| chr8:38949583   | PLEKHA2 | UTR3        |                                                                                          | + | TtoC | 0.1111 | 0.1667 | 9  | 3 | [13,38]  |
| chr8:38950528   | PLEKHA2 | UTR3        |                                                                                          | + | AtoG | 0.1053 | 0.1212 | 3  | 2 | [19,36]  |
| chr2:131623833  | PLEKHB2 | mixed       |                                                                                          | + | AtoG | 0.1    | 0.2143 | 3  | 2 | [10,14]  |
| chr19:44606867  | PLEKHG2 | coding_exon | ENST00000409794:LtoR;ENST00000425673:LtoR;ENST00000458508:LtoR;                          | + | TtoG | 0.1    | 0.1    | 4  | 2 | [10,10]  |
| chr1:148397845  | PLEKHO1 | coding_exon | ENST0000025469:EtotK;ENST00000369124:EtotK;                                              | + | GtoA | 0.1045 | 0.1087 | 4  | 2 | [67,138] |
| chr4:129027333  | PLK4    | coding_exon | ENST00000270861:LtoR;                                                                    | + | TtoG | 0.1    | 0.1    | 2  | 2 | [10,10]  |
| chr4:155679745  | PLRG1   | coding_exon | ENST00000302078:HtoQ;ENST00000393905:HtoQ;                                               | - | CtoA | 0.1111 | 0.1154 | 5  | 2 | [18,26]  |
| chr4:155686459  | PLRG1   | coding_exon |                                                                                          | - | AtoC | 0.1304 | 0.1818 | 2  | 2 | [11,23]  |
| chr3:147745103  | PLSCR1  | UTR5        |                                                                                          | - | TtoC | 0.1    | 0.1    | 2  | 2 | [10,10]  |
| chr3:48420928   | PLXNB1  | mixed       |                                                                                          | - | CtoA | 0.1    | 0.1667 | 2  | 2 | [10,12]  |
| chr12:93197392  | PLXNC1  | coding_exon | ENST00000258526:VtoA;                                                                    | + | TtoC | 0.1    | 0.1    | 4  | 2 | [10,10]  |
| chr12:93221740  | PLXNC1  | coding_exon |                                                                                          | + | AtoC | 0.1    | 0.1    | 2  | 2 | [10,10]  |
| chr18:55721739  | PMIAP1  | UTR3        |                                                                                          | + | GtoA | 0.1429 | 0.3636 | 4  | 2 | [11,14]  |
| chr1:154449469  | PMF1    | coding_exon | ENST00000302139:CtoW;ENST00000368273:CtoW;ENST00000368276:CtoW;ENST00000368276:CtoW;     | + | TtoG | 0.1111 | 0.1579 | 6  | 3 | [18,19]  |
| chr15:72122587  | PML     | mixed       |                                                                                          | + | AtoG | 0.1    | 0.1667 | 3  | 2 | [10,12]  |
| chr15:72124731  | PML     | UTR3        |                                                                                          | + | AtoC | 0.1818 | 0.2667 | 2  | 2 | [11,15]  |
| chr16:8850554   | PMM2    | UTR3        |                                                                                          | + | TtoG | 0.1875 | 0.2308 | 4  | 2 | [13,16]  |
| chr9:138438021  | PMPCA   | UTR3        |                                                                                          | + | TtoC | 0.125  | 0.25   | 11 | 6 | [10,30]  |
| chr9:138438024  | PMPCA   | UTR3        |                                                                                          | + | CtoG | 0.1538 | 0.2    | 5  | 2 | [10,13]  |
| chr7:102739765  | PMPCB   | coding_exon |                                                                                          | + | AtoG | 0.1    | 0.1216 | 2  | 2 | [40,74]  |
| chr2:218914554  | PNKD    | coding_exon | ENST00000258362:VtoG;ENST00000273077:VtoG;ENST00000436005:VtoG;                          | + | TtoG | 0.1    | 0.1    | 3  | 2 | [10,10]  |
| chr2:218912844  | PNKD    | coding_exon | ENST00000258362:TtoP;ENST00000273077:TtoP;ENST00000436005:TtoP;                          | + | AtoC | 0.1    | 0.125  | 2  | 2 | [10,16]  |
| chr2:218850400  | PNKD    | coding_exon |                                                                                          | + | AtoG | 0.1333 | 0.1818 | 3  | 2 | [11,15]  |
| chr2:218854968  | PNKD    | coding_exon |                                                                                          | + | GtoA | 0.4286 | 0.4375 | 2  | 2 | [14,16]  |
| chr14:38721857  | PNN     | UTR3        |                                                                                          | + | AtoG | 0.1    | 0.1667 | 2  | 2 | [10,12]  |
| chr8:28242716   | PNOC    | coding_exon |                                                                                          | + | GtoA | 0.7    | 0.9091 | 2  | 2 | [10,11]  |
| chr8:28252871   | PNOC    | coding_exon |                                                                                          | + | TtoC | 0.16   | 0.1667 | 4  | 2 | [18,25]  |
| chr11:812569    | PNPLA2  | coding_exon | ENST00000336615:VtoS;                                                                    | + | AtoC | 0.1    | 0.1667 | 2  | 2 | [10,12]  |
| chr19:7513741   | PNPLA6  | coding_exon | ENST00000221249:PtoL;ENST00000414982:PtoL;ENST00000450331:PtoL;                          | + | CtoT | 0.3182 | 0.6    | 2  | 2 | [10,22]  |
| chr17:43377042  | PNPO    | coding_exon | ENST00000225573:FtoI;ENST00000434554:FtoI;                                               | + | TtoA | 0.1    | 0.1333 | 3  | 2 | [10,15]  |
| chr17:43381578  | PNPO    | UTR3        |                                                                                          | + | TtoA | 0.1    | 0.1111 | 5  | 2 | [10,18]  |
| chr17:43381620  | PNPO    | UTR3        |                                                                                          | + | TtoC | 0.1    | 0.1    | 2  | 2 | [10,10]  |
| chr2:55726022   | PNPT1   | coding_exon |                                                                                          | - | TtoC | 0.12   | 0.1667 | 7  | 2 | [12,25]  |
| chr2:55747723   | PNPT1   | coding_exon |                                                                                          | - | TtoC | 0.1429 | 0.4167 | 5  | 2 | [12,28]  |
| chr6:89850615   | PNRC1   | coding_exon | ENST00000336032:LtoP;                                                                    | + | TtoC | 0.1103 | 0.1143 | 5  | 2 | [37,138] |
| chr6:89847281   | PNRC1   | UTR5        |                                                                                          | + | CtoG | 0.3    | 0.5455 | 7  | 3 | [10,11]  |
| chr6:89847283   | PNRC1   | UTR5        |                                                                                          | + | TtoC | 0.2    | 0.3333 | 5  | 3 | [15,18]  |
| chr6:89847284   | PNRC1   | UTR5        |                                                                                          | + | TtoC | 0.1667 | 0.2143 | 3  | 2 | [14,18]  |
| chr20:30288193  | POFUT1  | UTR3        |                                                                                          | + | TtoG | 0.1    | 0.1333 | 4  | 2 | [10,15]  |
| chr21:45508846  | POFUT2  | UTR3        |                                                                                          | - | AtoG | 0.1333 | 0.1875 | 3  | 2 | [16,16]  |
| chr1:165084960  | POGK    | coding_exon | ENST00000367875:MtoV;ENST00000367876:MtoV;                                               | + | AtoG | 0.1    | 0.125  | 2  | 2 | [10,16]  |
| chr1:165090212  | POGK    | UTR3        |                                                                                          | + | AtoG | 0.1111 | 0.1538 | 3  | 2 | [13,18]  |
| chr1:165090285  | POGK    | UTR3        |                                                                                          | + | TtoA | 0.1    | 0.1333 | 6  | 2 | [10,15]  |
| chr1:149668792  | POGZ    | coding_exon | ENST00000271715:VtoA;ENST00000361398:VtoA;ENST00000392723:VtoA;ENST00000392723:VtoA;     | - | TtoC | 0.1429 | 0.1818 | 3  | 2 | [11,14]  |
| chr1:149669792  | POGZ    | coding_exon | ENST00000271715:StoP;ENST00000361398:StoP;ENST00000392723:StoP;ENST00000392723:StoP;     | - | TtoC | 0.1    | 0.1    | 3  | 2 | [10,10]  |
| chr1:149644865  | POGZ    | coding_exon |                                                                                          | - | CtoA | 0.1    | 0.1429 | 2  | 2 | [14,20]  |
| chr1:149643420  | POGZ    | UTR3        |                                                                                          | - | AtoG | 0.1    | 0.1667 | 2  | 2 | [10,12]  |
| chr1:149643684  | POGZ    | UTR3        |                                                                                          | - | AtoG | 0.1    | 0.1    | 2  | 2 | [10,10]  |
| chr11:64821364  | POLA2   | UTR3        |                                                                                          | + | AtoG | 0.1429 | 0.3    | 5  | 3 | [10,41]  |
| chr8:42348373   | POLB    | UTR3        |                                                                                          | + | TtoG | 0.1    | 0.1304 | 4  | 2 | [10,23]  |
| chr7:44128278   | POLD2   | UTR5        |                                                                                          | - | TtoC | 0.1053 | 0.1111 | 2  | 2 | [18,19]  |
| chr11:74017960  | POLD3   | coding_exon | ENST00000263681:MtoT;                                                                    | + | TtoC | 0.1    | 0.1    | 3  | 2 | [10,20]  |
| chr17:66875599  | POLD4   | UTR3        |                                                                                          | - | TtoC | 0.1111 | 0.1667 | 11 | 3 | [12,30]  |
| chr17:23698373  | POLDIP2 | mixed       |                                                                                          | - | AtoG | 0.1    | 0.1818 | 2  | 2 | [10,11]  |
| chr22:41309718  | POLDIP3 | UTR3        |                                                                                          | - | TtoC | 0.1667 | 0.2    | 3  | 2 | [10,19]  |
| chr22:41310356  | POLDIP3 | UTR3        |                                                                                          | - | CtoA | 0.1429 | 0.1667 | 2  | 2 | [14,18]  |
| chr22:41310362  | POLDIP3 | UTR3        |                                                                                          | - | AtoG | 0.1429 | 0.24   | 5  | 3 | [21,25]  |
| chr12:131719111 | POLE    | mixed       |                                                                                          | - | AtoC | 0.1    | 0.1818 | 2  | 2 | [10,11]  |
| chr12:131728479 | POLE    | mixed       |                                                                                          | - | CtoA | 0.1    | 0.1429 | 2  | 2 | [10,14]  |
| chr12:131728882 | POLE    | mixed       |                                                                                          | - | TtoA | 0.1    | 0.125  | 3  | 2 | [10,16]  |
| chr15:87671224  | POLG    | coding_exon | ENST00000268124:VtoA;ENST00000442287:VtoA;                                               | - | TtoC | 0.1    | 0.1176 | 5  | 2 | [10,17]  |
| chr15:87663575  | POLG    | coding_exon | ENST00000268124:StoA;ENST00000442287:StoA;                                               | - | TtoG | 0.1538 | 0.1818 | 6  | 3 | [11,25]  |
| chr15:87662900  | POLG    | coding_exon | ENST00000268124:FtoV;ENST00000442287:FtoV;                                               | - | TtoG | 0.1111 | 0.3125 | 9  | 4 | [14,18]  |
| chr6:43689602   | POLH    | coding_exon | ENST00000372236:QtoR;                                                                    | + | AtoG | 0.1    | 0.1    | 2  | 2 | [10,10]  |
| chr2:86122575   | POLR1A  | coding_exon | ENST00000263857:WtoR;ENST00000409681:WtoR;                                               | - | TtoC | 0.1    | 0.1    | 2  | 2 | [10,10]  |
| chr2:113033574  | POLR1B  | coding_exon | ENST00000263331:TtoS;ENST00000417433:TtoS;                                               | + | AtoT | 0.1    | 0.1    | 2  | 2 | [10,10]  |
| chr2:113021068  | POLR1B  | coding_exon |                                                                                          | + | TtoC | 0.1538 | 0.1579 | 3  | 2 | [13,19]  |
| chr2:113023377  | POLR1B  | coding_exon |                                                                                          | + | TtoC | 0.1    | 0.1111 | 3  | 2 | [10,10]  |
| chr13:27138554  | POLR1D  | UTR3        |                                                                                          | + | TtoC | 0.1    | 0.1538 | 3  | 2 | [10,13]  |
| chr13:27138834  | POLR1E  | UTR3        |                                                                                          | + | TtoA | 0.1111 | 0.1111 | 2  | 2 | [10,36]  |
| chr9:37476086   | POLR1E  | mixed       |                                                                                          | + | TtoC | 0.1    | 0.1111 | 2  | 2 | [18,20]  |
| chr17:7356012   | POLR2A  | coding_exon | ENST00000322644:NtoK;                                                                    | + | CtoA | 0.1304 | 0.1538 | 2  | 2 | [13,23]  |
| chr17:7356274   | POLR2A  | coding_exon | ENST00000322644:LtoP;                                                                    | + | TtoC | 0.1    | 0.25   | 6  | 4 | [10,20]  |
| chr4:57567852   | POLR2B  | coding_exon | ENST00000314595:LtoQ;ENST00000381227:LtoQ;                                               | + | TtoA | 0.1176 | 0.15   | 10 | 3 | [18,20]  |
| chr4:57555756   | POLR2B  | coding_exon |                                                                                          | + | TtoC | 0.1    | 0.2    | 5  | 2 | [10,10]  |
| chr2:128321840  | POLR2D  | UTR3        |                                                                                          | - | TtoG | 0.1    | 0.1111 | 3  | 2 | [10,10]  |
| chr2:128321844  | POLR2D  | UTR3        |                                                                                          | - | CtoG | 0.1    | 0.1818 | 3  | 2 | [10,11]  |
| chr2:128321846  | POLR2D  | UTR3        |                                                                                          | - | TtoC | 0.1    | 0.1176 | 6  | 2 | [10,17]  |
| chr19:1037628   | POLR2E  | UTR3        |                                                                                          | - | AtoT | 0.4    | 0.9231 | 4  | 4 | [10,16]  |
| chr19:1037629   | POLR2E  | UTR3        |                                                                                          | - | CtoT | 0.2    | 0.3636 | 7  | 7 | [10,16]  |
| chr22:36693703  | POLR2F  | mixed       |                                                                                          | + | AtoG | 0.1053 | 0.1176 | 5  | 3 | [19,35]  |
| chr11:830202    | POLR2L  | UTR3        |                                                                                          | - | TtoA | 0.1429 | 0.6667 | 9  | 8 | [10,26]  |
| chr10:79443427  | POLR3A  | coding_exon | ENST00000372371:LtoH;                                                                    | - | TtoA | 0.1    | 0.1    | 2  | 2 | [10,10]  |
| chr10:79432040  | POLR3A  | coding_exon |                                                                                          | - | TtoC | 0.1    | 0.1    | 3  | 2 | [10,10]  |
| chr10:79405482  | POLR3A  | UTR3        |                                                                                          | - | TtoC | 0.1    | 0.1    | 2  | 2 | [10,10]  |
| chr16:22253170  | POLR3E  | UTR3        |                                                                                          | + | GtoC | 0.1111 | 0.1538 | 2  | 2 | [13,18]  |

|                 |          |             |                                                                                      |   |      |        |        |    |    |          |
|-----------------|----------|-------------|--------------------------------------------------------------------------------------|---|------|--------|--------|----|----|----------|
| chr19:575856    | POLRMT   | coding_exon | ENST00000215591:TtoP;ENST00000432652:TtoP;                                           | - | AtoC | 0.1667 | 0.1667 | 6  | 2  | [12,18]  |
| chr5:6808769    | POLS     | UTR3        |                                                                                      | + | AtoC | 0.1    | 0.1    | 2  | 2  | [10,10]  |
| chr5:6809110    | POLS     | UTR3        |                                                                                      | + | TtoC | 0.1111 | 0.1176 | 3  | 2  | [18,18]  |
| chr5:6809650    | POLS     | UTR3        |                                                                                      | + | TtoG | 0.1    | 0.1333 | 2  | 2  | [10,15]  |
| chr1:46435288   | POMGNT1  | coding_exon | ENST00000371984:LtoP;ENST00000371986:LtoP;ENST00000371992:LtoP;ENST00000371992:LtoP; | - | TtoC | 0.1    | 0.1176 | 2  | 2  | [10,17]  |
| chr1:46428198   | POMGNT1  | mixed       |                                                                                      | - | TtoC | 0.1    | 0.1    | 3  | 2  | [10,10]  |
| chr13:28150337  | POMP     | UTR3        |                                                                                      | + | GtoA | 0.1053 | 0.16   | 8  | 3  | [19,47]  |
| chr9:133388249  | POMT1    | coding_exon | ENST00000341012:StoP;ENST00000354713:StoP;ENST00000372228:StoP;ENST00000372228:StoP; | + | TtoC | 0.1    | 0.1    | 3  | 2  | [10,10]  |
| chr9:133387318  | POMT1    | coding_exon | ENST00000341012:LtoP;ENST00000354713:LtoP;ENST00000372228:LtoP;ENST00000372228:LtoP; | + | TtoC | 0.1176 | 0.1667 | 4  | 2  | [12,17]  |
| chr9:133388436  | POMT1    | UTR3        |                                                                                      | + | GtoC | 0.1    | 0.1    | 3  | 2  | [10,10]  |
| chr8:99237725   | POP1     | coding_exon | ENST00000349693:CtoG;ENST00000401707:CtoG;                                           | + | TtoG | 0.1    | 0.15   | 2  | 2  | [10,20]  |
| chr8:99222201   | POP1     | coding_exon |                                                                                      | + | AtoG | 0.1    | 0.1071 | 2  | 2  | [10,28]  |
| chr11:110728197 | POU2AF1  | UTR3        |                                                                                      | - | TtoC | 0.1053 | 0.2273 | 12 | 5  | [17,38]  |
| chr1:165651818  | POU2F1   | UTR3        |                                                                                      | + | CtoA | 0.1818 | 0.25   | 2  | 2  | [11,16]  |
| chr1:165656320  | POU2F1   | UTR3        |                                                                                      | + | TtoG | 0.1667 | 0.3    | 2  | 2  | [10,12]  |
| chr1:165659439  | POU2F1   | UTR3        |                                                                                      | + | AtoG | 0.1    | 0.1    | 4  | 2  | [10,10]  |
| chr19:47288084  | POU2F2   | coding_exon | ENST00000292077:LtoF;ENST00000342301:LtoF;ENST00000389341:LtoF;                      | - | GtoT | 0.1273 | 0.25   | 4  | 3  | [40,55]  |
| chr19:47287896  | POU2F2   | coding_exon |                                                                                      | - | AtoG | 0.2667 | 0.3077 | 3  | 2  | [13,15]  |
| chr19:47286210  | POU2F2   | UTR3        |                                                                                      | - | GtoA | 0.1    | 0.125  | 7  | 3  | [16,20]  |
| chr10:71644307  | PPA1     | coding_exon | ENST00000373230:CtoW;ENST00000373232:CtoW;                                           | - | TtoG | 0.1132 | 0.15   | 11 | 5  | [20,296] |
| chr4:106510200  | PPA2     | UTR3        |                                                                                      | - | AtoG | 0.1429 | 0.1818 | 5  | 3  | [11,14]  |
| chr19:10082971  | PPAN     | coding_exon |                                                                                      | + | CtoA | 0.6667 | 0.9231 | 3  | 3  | [11,15]  |
| chr19:10083413  | PPAN     | coding_exon |                                                                                      | + | TtoC | 0.125  | 0.2    | 3  | 2  | [10,16]  |
| chr5:54756447   | PPAP2A   | UTR3        |                                                                                      | - | AtoG | 0.1    | 0.1538 | 6  | 4  | [10,19]  |
| chr8:38241277   | PPAPDC18 | coding_exon | ENST00000317577:VtoL;ENST00000424479:VtoL;                                           | - | GtoC | 0.1    | 0.1    | 2  | 2  | [10,10]  |
| chr5:149213571  | PPARGC18 | UTR3        |                                                                                      | + | AtoG | 0.1    | 0.1    | 2  | 2  | [10,10]  |
| chr15:73129111  | PPCDC    | UTR3        |                                                                                      | + | GtoA | 0.1053 | 0.1538 | 3  | 2  | [13,19]  |
| chr15:73129114  | PPCDC    | UTR3        |                                                                                      | + | AtoG | 0.1    | 0.1    | 3  | 2  | [10,10]  |
| chr20:61623960  | PPDPF    | UTR3        |                                                                                      | + | TtoA | 0.1064 | 0.12   | 7  | 2  | [25,51]  |
| chr12:27725875  | PPFIBP1  | coding_exon |                                                                                      | + | TtoG | 0.1    | 0.1    | 2  | 2  | [10,10]  |
| chr12:27739015  | PPFIBP1  | UTR3        |                                                                                      | + | TtoA | 0.1    | 0.1    | 2  | 2  | [10,10]  |
| chr12:27568528  | PPFIBP1  | UTR5        |                                                                                      | + | AtoT | 0.1    | 0.1    | 2  | 2  | [10,10]  |
| chr12:41121926  | PPHLN1   | mixed       |                                                                                      | + | TtoA | 0.1    | 0.1538 | 6  | 5  | [10,25]  |
| chr7:44805604   | PPIA     | coding_exon | ENST00000451562:QtoH;ENST00000468812:QtoH;                                           | + | GtoC | 0.1    | 0.1429 | 4  | 2  | [10,21]  |
| chr7:44805960   | PPIA     | coding_exon | ENST00000451562:NtoK;ENST00000468812:NtoK;                                           | + | TtoA | 0.1    | 0.1667 | 14 | 6  | [10,28]  |
| chr7:44805563   | PPIA     | coding_exon | ENST00000451562:GtoS;ENST00000468812:GtoS;                                           | + | GtoA | 0.1111 | 0.4    | 13 | 10 | [16,72]  |
| chr7:44805564   | PPIA     | coding_exon | ENST00000451562:GtoD;ENST00000468812:GtoD;                                           | + | GtoA | 0.1111 | 0.1111 | 5  | 2  | [18,27]  |
| chr7:44805962   | PPIA     | coding_exon | ENST00000451562:GtoD;ENST00000468812:GtoD;                                           | + | GtoA | 0.15   | 0.2308 | 11 | 4  | [13,33]  |
| chr7:44805826   | PPIA     | coding_exon | ENST00000451562:GtoC;ENST00000468812:GtoC;                                           | + | GtoT | 0.1034 | 0.2308 | 8  | 6  | [13,32]  |
| chr7:44805827   | PPIA     | coding_exon | ENST00000451562:GtoA;ENST00000468812:GtoA;                                           | + | GtoC | 0.1    | 0.1429 | 3  | 2  | [10,28]  |
| chr7:44805971   | PPIA     | coding_exon | ENST00000451562:FtoS;ENST00000468812:FtoS;                                           | + | TtoC | 0.1    | 0.1818 | 6  | 3  | [10,14]  |
| chr7:44805832   | PPIA     | coding_exon | ENST00000451562:DtoH;ENST00000468812:DtoH;                                           | + | GtoC | 0.1    | 0.1053 | 6  | 2  | [19,40]  |
| chr7:44804874   | PPIA     | coding_exon |                                                                                      | + | AtoC | 0.1    | 0.12   | 9  | 4  | [20,34]  |
| chr7:44804875   | PPIA     | coding_exon |                                                                                      | + | AtoG | 0.1    | 0.1071 | 9  | 2  | [20,28]  |
| chr7:44804919   | PPIA     | coding_exon |                                                                                      | + | GtoA | 0.1    | 0.5769 | 14 | 10 | [24,43]  |
| chr7:44805562   | PPIA     | coding_exon |                                                                                      | + | GtoA | 0.1    | 0.1176 | 5  | 2  | [17,30]  |
| chr7:44807700   | PPIA     | UTR3        |                                                                                      | + | TtoC | 0.1111 | 0.1212 | 3  | 2  | [36,48]  |
| chr7:44807707   | PPIA     | UTR3        |                                                                                      | + | AtoG | 0.1026 | 0.125  | 5  | 2  | [24,39]  |
| chr7:44807708   | PPIA     | UTR3        |                                                                                      | + | TtoA | 0.1    | 0.2381 | 4  | 2  | [10,22]  |
| chr7:44807716   | PPIA     | UTR3        |                                                                                      | + | TtoA | 0.1    | 0.7222 | 7  | 7  | [17,35]  |
| chr7:44807718   | PPIA     | UTR3        |                                                                                      | + | AtoC | 0.1176 | 0.6875 | 10 | 9  | [16,36]  |
| chr7:44807753   | PPIA     | UTR3        |                                                                                      | + | TtoA | 0.1    | 0.4545 | 12 | 9  | [10,28]  |
| chr7:44807912   | PPIA     | UTR3        |                                                                                      | + | AtoG | 0.125  | 0.1724 | 11 | 4  | [22,32]  |
| chr7:44807913   | PPIA     | UTR3        |                                                                                      | + | AtoG | 0.1042 | 0.45   | 15 | 14 | [15,48]  |
| chr7:44808624   | PPIA     | UTR3        |                                                                                      | + | AtoG | 0.1912 | 0.6522 | 19 | 19 | [11,69]  |
| chr7:44802808   | PPIA     | UTR5        |                                                                                      | + | TtoC | 0.1    | 0.1    | 2  | 2  | [10,10]  |
| chr7:44802814   | PPIA     | UTR5        |                                                                                      | + | AtoC | 0.125  | 0.125  | 2  | 2  | [16,24]  |
| chr4:159856180  | PPID     | coding_exon | ENST00000307720:DtoG;                                                                | - | AtoG | 0.1    | 0.1538 | 7  | 3  | [10,15]  |
| chr4:159856179  | PPID     | coding_exon | ENST00000307720:DtoE;                                                                | - | TtoA | 0.1429 | 0.1818 | 7  | 4  | [12,18]  |
| chr4:159861955  | PPID     | coding_exon |                                                                                      | - | TtoG | 0.1053 | 0.1538 | 6  | 2  | [13,20]  |
| chr10:80783553  | PPIF     | mixed       |                                                                                      | + | TtoC | 0.1111 | 0.1296 | 3  | 2  | [27,54]  |
| chr10:80784359  | PPIF     | UTR3        |                                                                                      | + | TtoA | 0.1136 | 0.1667 | 7  | 2  | [20,46]  |
| chr2:170196594  | PPIG     | coding_exon |                                                                                      | + | TtoC | 0.1034 | 0.11   | 3  | 2  | [29,102] |
| chr6:36930914   | PPIL1    | UTR3        |                                                                                      | - | TtoG | 0.1    | 0.1    | 4  | 2  | [10,10]  |
| chr6:36930916   | PPIL1    | UTR3        |                                                                                      | - | AtoG | 0.125  | 0.1818 | 2  | 2  | [11,24]  |
| chr6:36931104   | PPIL1    | UTR3        |                                                                                      | - | TtoG | 0.1071 | 0.1333 | 6  | 2  | [15,28]  |
| chr6:149868288  | PPIL4    | coding_exon | ENST00000340881:ltoT;                                                                | - | TtoC | 0.1818 | 0.3636 | 6  | 5  | [11,22]  |
| chr6:149898490  | PPIL4    | coding_exon | ENST00000253329:MtoL;                                                                | - | GtoT | 0.1333 | 0.1818 | 4  | 2  | [11,15]  |
| chr6:149903846  | PPIL4    | coding_exon | ENST00000253329:KtoN;                                                                | - | AtoC | 0.1111 | 0.2143 | 5  | 3  | [14,18]  |
| chr6:149896301  | PPIL4    | coding_exon | ENST00000253329:ltoL;                                                                | - | AtoT | 0.125  | 0.1875 | 9  | 3  | [13,24]  |
| chr6:149903793  | PPIL4    | coding_exon | ENST00000253329:GtoD;                                                                | - | GtoA | 0.1818 | 0.3333 | 3  | 2  | [11,12]  |
| chr6:149889513  | PPIL4    | coding_exon | ENST00000253329:EtoD;                                                                | - | AtoT | 0.125  | 0.1667 | 3  | 2  | [12,16]  |
| chr6:149883990  | PPIL4    | coding_exon | ENST00000253329:CtoV;                                                                | - | GtoA | 0.1    | 0.1818 | 5  | 3  | [10,11]  |
| chr6:149903854  | PPIL4    | coding_exon | ENST00000253329:AtoT;                                                                | - | GtoA | 0.1    | 0.1818 | 4  | 3  | [11,20]  |
| chr6:149889570  | PPIL4    | coding_exon |                                                                                      | - | AtoG | 0.1    | 0.1053 | 5  | 2  | [10,19]  |
| chr6:149896293  | PPIL4    | coding_exon |                                                                                      | - | GtoA | 0.1053 | 0.25   | 10 | 6  | [12,26]  |
| chr6:149898556  | PPIL4    | coding_exon |                                                                                      | - | CtoT | 0.1    | 0.1667 | 2  | 2  | [12,20]  |
| chr6:149868253  | PPIL4    | UTR3        |                                                                                      | - | AtoG | 0.1    | 0.1538 | 5  | 3  | [10,14]  |
| chr6:149868259  | PPIL4    | UTR3        |                                                                                      | - | AtoT | 0.1111 | 0.25   | 7  | 3  | [12,18]  |
| chr14:49150725  | PPIL5    | coding_exon | ENST00000298288:ltoF;ENST00000318317:DtoV;                                           | + | AtoT | 0.1    | 0.1    | 4  | 2  | [10,10]  |
| chr14:59829723  | PPM1A    | UTR3        |                                                                                      | + | AtoC | 0.1053 | 0.1429 | 3  | 2  | [14,20]  |
| chr2:44282051   | PPM1B    | mixed       |                                                                                      | + | AtoT | 0.1    | 0.1667 | 2  | 2  | [10,12]  |
| chr2:44298720   | PPM1B    | mixed       |                                                                                      | + | AtoG | 0.125  | 0.129  | 3  | 2  | [16,31]  |
| chr17:56066055  | PPM1D    | coding_exon | ENST00000305921:NtoI;ENST00000392995:NtoI;                                           | + | AtoT | 0.1    | 0.1    | 2  | 2  | [10,10]  |
| chr4:89397983   | PPM1K    | UTR3        |                                                                                      | - | TtoG | 0.1    | 0.125  | 6  | 2  | [10,16]  |
| chr4:89401782   | PPM1K    | UTR3        |                                                                                      | - | CtoA | 0.1    | 0.1667 | 2  | 2  | [10,12]  |
| chr3:52258018   | PPM1M    | coding_exon | ENST00000296487:LtoI;ENST00000323588:LtoI;ENST00000409502:LtoI;                      | + | TtoA | 0.1    | 0.1    | 2  | 2  | [10,10]  |
| chr1:159407896  | PPOX     | coding_exon |                                                                                      | + | AtoC | 0.1    | 0.1154 | 3  | 2  | [20,26]  |
| chr1:159407897  | PPOX     | coding_exon |                                                                                      | + | AtoT | 0.1053 | 0.1304 | 3  | 2  | [19,23]  |
| chr11:66930738  | PPP1CA   | coding_exon |                                                                                      | - | AtoT | 0.1    | 0.1034 | 4  | 2  | [10,30]  |
| chr11:66930881  | PPP1CA   | coding_exon |                                                                                      | - | AtoC | 0.1    | 0.1053 | 2  | 2  | [10,19]  |
| chr11:66922228  | PPP1CA   | UTR3        |                                                                                      | - | CtoA | 0.125  | 0.1364 | 8  | 2  | [22,40]  |
| chr12:109643117 | PPP1CC   | mixed       |                                                                                      | - | AtoG | 0.1136 | 0.1333 | 4  | 3  | [15,44]  |
| chr12:109642003 | PPP1CC   | UTR3        |                                                                                      | - | AtoG | 0.1    | 0.1818 | 6  | 3  | [12,22]  |
| chr6:30676633   | PPP1R10  | UTR3        |                                                                                      | - | TtoC | 0.1053 | 0.12   | 7  | 2  | [20,26]  |
| chr12:78693720  | PPP1R12A | UTR3        |                                                                                      | - | AtoG | 0.1176 | 0.1818 | 2  | 2  | [11,17]  |

|                 |          |             |                                                                                                                                                                                                                                                                                                                                                                                                                                                                                                                          |   |      |        |        |    |    |          |
|-----------------|----------|-------------|--------------------------------------------------------------------------------------------------------------------------------------------------------------------------------------------------------------------------------------------------------------------------------------------------------------------------------------------------------------------------------------------------------------------------------------------------------------------------------------------------------------------------|---|------|--------|--------|----|----|----------|
| chr11:63768983  | PPP1R14B | coding_exon | ENST00000309318:TtoA;                                                                                                                                                                                                                                                                                                                                                                                                                                                                                                    | - | AtoG | 0.1    | 0.2759 | 12 | 8  | [13,31]  |
| chr11:63768824  | PPP1R14B | coding_exon | ENST00000309318:LtoP;                                                                                                                                                                                                                                                                                                                                                                                                                                                                                                    | - | TtoC | 0.1    | 0.2308 | 4  | 3  | [11,16]  |
| chr11:63770495  | PPP1R14B | coding_exon | ENST00000309318:LtoP;                                                                                                                                                                                                                                                                                                                                                                                                                                                                                                    | - | TtoC | 0.12   | 0.3125 | 8  | 8  | [15,66]  |
| chr1:28040250   | PPP1R8   | mixed       |                                                                                                                                                                                                                                                                                                                                                                                                                                                                                                                          | + | TtoG | 0.1111 | 0.1818 | 9  | 5  | [22,27]  |
| chr17:45567647  | PPP1R9B  | UTR3        |                                                                                                                                                                                                                                                                                                                                                                                                                                                                                                                          | - | TtoC | 0.75   | 1      | 2  | 2  | [12,12]  |
| chr5:133560909  | PPP2CA   | UTR3        |                                                                                                                                                                                                                                                                                                                                                                                                                                                                                                                          | - | TtoA | 0.1    | 0.1429 | 2  | 2  | [10,14]  |
| chr8:30771337   | PPP2CB   | coding_exon |                                                                                                                                                                                                                                                                                                                                                                                                                                                                                                                          | - | AtoC | 0.1    | 0.125  | 3  | 2  | [10,16]  |
| chr19:57385101  | PPP2R1A  | UTR5        |                                                                                                                                                                                                                                                                                                                                                                                                                                                                                                                          | + | GtoC | 0.1    | 0.2143 | 2  | 2  | [10,14]  |
| chr11:111140790 | PPP2R1B  | coding_exon |                                                                                                                                                                                                                                                                                                                                                                                                                                                                                                                          | - | GtoT | 0.1    | 0.1    | 2  | 2  | [10,10]  |
| chr10:133603593 | PPP2R2D  | UTR5        |                                                                                                                                                                                                                                                                                                                                                                                                                                                                                                                          | + | GtoA | 0.1    | 0.1    | 2  | 2  | [10,10]  |
| chr9:130951040  | PPP2R4   | UTR3        |                                                                                                                                                                                                                                                                                                                                                                                                                                                                                                                          | + | CtoG | 0.1538 | 0.3    | 2  | 2  | [10,13]  |
| chr1:210600732  | PPP2R5A  | coding_exon |                                                                                                                                                                                                                                                                                                                                                                                                                                                                                                                          | + | AtoG | 0.1    | 0.1    | 2  | 2  | [10,10]  |
| chr11:64451883  | PPP2R5B  | coding_exon | ENST00000164133:StoG;                                                                                                                                                                                                                                                                                                                                                                                                                                                                                                    | + | AtoG | 0.1    | 0.1    | 3  | 2  | [10,10]  |
| chr14:101463267 | PPP2R5C  | UTR3        |                                                                                                                                                                                                                                                                                                                                                                                                                                                                                                                          | + | TtoC | 0.1    | 0.1176 | 8  | 3  | [17,20]  |
| chr14:101463268 | PPP2R5C  | UTR3        |                                                                                                                                                                                                                                                                                                                                                                                                                                                                                                                          | + | GtoT | 0.1    | 0.1111 | 7  | 2  | [10,18]  |
| chr14:101463289 | PPP2R5C  | UTR3        |                                                                                                                                                                                                                                                                                                                                                                                                                                                                                                                          | + | TtoC | 0.1    | 0.2    | 3  | 2  | [20,20]  |
| chr14:101463317 | PPP2R5C  | UTR3        |                                                                                                                                                                                                                                                                                                                                                                                                                                                                                                                          | + | GtoA | 0.1    | 0.1818 | 7  | 2  | [10,11]  |
| chr14:101463360 | PPP2R5C  | UTR3        |                                                                                                                                                                                                                                                                                                                                                                                                                                                                                                                          | + | TtoA | 1      | 1      | 12 | 12 | [10,23]  |
| chr14:63076069  | PPP2R5E  | coding_exon | ENST00000337537:StoP;                                                                                                                                                                                                                                                                                                                                                                                                                                                                                                    | - | TtoC | 0.1    | 0.1364 | 6  | 2  | [10,22]  |
| chr14:63079666  | PPP2R5E  | UTR5        |                                                                                                                                                                                                                                                                                                                                                                                                                                                                                                                          | - | TtoG | 0.1    | 0.1    | 2  | 2  | [10,20]  |
| chr10:74876340  | PPP3CB   | coding_exon | ENST00000394828:VtoE;ENST00000394829:VtoE;                                                                                                                                                                                                                                                                                                                                                                                                                                                                               | - | TtoA | 0.1    | 0.25   | 11 | 10 | [12,27]  |
| chr10:74876339  | PPP3CB   | coding_exon |                                                                                                                                                                                                                                                                                                                                                                                                                                                                                                                          | - | AtoT | 0.1    | 0.2727 | 12 | 10 | [10,29]  |
| chr10:74867702  | PPP3CB   | UTR3        |                                                                                                                                                                                                                                                                                                                                                                                                                                                                                                                          | - | TtoC | 0.1    | 0.1111 | 3  | 2  | [10,18]  |
| chr2:68259808   | PPP3R1   | mixed       |                                                                                                                                                                                                                                                                                                                                                                                                                                                                                                                          | - | AtoG | 0.1    | 0.1111 | 4  | 2  | [10,18]  |
| chr2:68261334   | PPP3R1   | mixed       |                                                                                                                                                                                                                                                                                                                                                                                                                                                                                                                          | - | TtoG | 0.1    | 0.1818 | 2  | 2  | [11,11]  |
| chr2:68261339   | PPP3R1   | mixed       |                                                                                                                                                                                                                                                                                                                                                                                                                                                                                                                          | - | TtoC | 0.1    | 0.1818 | 6  | 2  | [10,23]  |
| chr18:9537102   | PPP4R1   | UTR3        |                                                                                                                                                                                                                                                                                                                                                                                                                                                                                                                          | - | AtoG | 0.1    | 0.1    | 2  | 2  | [10,10]  |
| chr3:73195927   | PPP4R2   | coding_exon | ENST00000356692:LtoW;ENST00000394284:LtoW;                                                                                                                                                                                                                                                                                                                                                                                                                                                                               | + | TtoG | 0.1333 | 0.3636 | 4  | 4  | [10,15]  |
| chr22:40325171  | PPPDE2   | UTR3        |                                                                                                                                                                                                                                                                                                                                                                                                                                                                                                                          | - | TtoA | 0.1333 | 0.1875 | 3  | 2  | [15,16]  |
| chr22:40325172  | PPPDE2   | UTR3        |                                                                                                                                                                                                                                                                                                                                                                                                                                                                                                                          | - | TtoA | 0.1    | 0.2308 | 3  | 3  | [10,15]  |
| chr22:40325206  | PPPDE2   | UTR3        |                                                                                                                                                                                                                                                                                                                                                                                                                                                                                                                          | - | AtoG | 0.1111 | 0.5455 | 12 | 10 | [10,26]  |
| chr22:40325230  | PPPDE2   | UTR3        |                                                                                                                                                                                                                                                                                                                                                                                                                                                                                                                          | - | AtoG | 0.1    | 0.2727 | 3  | 2  | [11,30]  |
| chr22:40325252  | PPPDE2   | UTR3        |                                                                                                                                                                                                                                                                                                                                                                                                                                                                                                                          | - | AtoG | 0.1579 | 0.1923 | 4  | 2  | [19,26]  |
| chr22:40325496  | PPPDE2   | UTR3        |                                                                                                                                                                                                                                                                                                                                                                                                                                                                                                                          | - | TtoC | 0.1    | 0.2    | 2  | 2  | [10,10]  |
| chr22:40326270  | PPPDE2   | UTR3        |                                                                                                                                                                                                                                                                                                                                                                                                                                                                                                                          | - | CtoT | 0.1364 | 0.16   | 8  | 2  | [23,25]  |
| chr22:40326274  | PPPDE2   | UTR3        |                                                                                                                                                                                                                                                                                                                                                                                                                                                                                                                          | - | AtoG | 0.1    | 0.125  | 2  | 2  | [16,20]  |
| chr22:40326309  | PPPDE2   | UTR3        |                                                                                                                                                                                                                                                                                                                                                                                                                                                                                                                          | - | AtoG | 0.1    | 0.1429 | 5  | 2  | [10,14]  |
| chr10:103890952 | PPRC1    | coding_exon |                                                                                                                                                                                                                                                                                                                                                                                                                                                                                                                          | + | TtoC | 0.1    | 0.1    | 2  | 2  | [10,10]  |
| chr10:103894052 | PPRC1    | coding_exon |                                                                                                                                                                                                                                                                                                                                                                                                                                                                                                                          | + | AtoC | 0.1    | 0.1    | 2  | 2  | [10,10]  |
| chr5:64918951   | PPWD1    | coding_exon | ENST00000261308:VtoA;                                                                                                                                                                                                                                                                                                                                                                                                                                                                                                    | + | TtoC | 0.12   | 0.1667 | 6  | 3  | [12,26]  |
| chr5:64918956   | PPWD1    | coding_exon | ENST00000261308:itoV;                                                                                                                                                                                                                                                                                                                                                                                                                                                                                                    | + | AtoG | 0.1    | 0.3    | 3  | 3  | [10,10]  |
| chr5:64914621   | PPWD1    | coding_exon | ENST00000261308:FtoL;                                                                                                                                                                                                                                                                                                                                                                                                                                                                                                    | + | TtoC | 0.1    | 0.125  | 2  | 2  | [10,16]  |
| chr5:64894960   | PPWD1    | coding_exon | ENST00000261308:EtoK;                                                                                                                                                                                                                                                                                                                                                                                                                                                                                                    | + | GtoA | 0.1154 | 0.1923 | 9  | 4  | [25,28]  |
| chr18:75764108  | PQLC1    | UTR3        |                                                                                                                                                                                                                                                                                                                                                                                                                                                                                                                          | - | TtoG | 0.1111 | 0.1111 | 2  | 2  | [10,10]  |
| chr15:89326052  | PRC1     | coding_exon | ENST00000361188:StoT;ENST00000361919:StoT;ENST00000394249:StoT;ENST00000394250:StoT;                                                                                                                                                                                                                                                                                                                                                                                                                                     | - | GtoC | 0.4762 | 0.75   | 2  | 2  | [12,21]  |
| chr6:106660942  | PRDM1    | coding_exon | ENST00000071246:HtoY;ENST00000369089:HtoY;ENST00000369091:HtoY;ENST000000071246:HtoR;ENST00000369089:HtoR;ENST00000369091:HtoR;ENST000000071246:HtoE;ENST00000369089:HtoE;ENST00000369091:HtoE;ENST000000071246:HtoK;ENST00000369089:HtoK;ENST00000369091:HtoK;                                                                                                                                                                                                                                                          | + | CtoT | 0.1026 | 0.2727 | 6  | 3  | [11,39]  |
| chr6:106660943  | PRDM1    | coding_exon | ENST00000071246:HtoR;ENST00000369089:HtoR;ENST00000369091:HtoR;ENST000000071246:HtoE;ENST00000369089:HtoE;ENST00000369091:HtoE;ENST000000071246:HtoK;ENST00000369089:HtoK;ENST00000369091:HtoK;                                                                                                                                                                                                                                                                                                                          | + | AtoG | 0.1    | 0.2308 | 6  | 4  | [10,28]  |
| chr1:13977665   | PRDM2    | coding_exon | ENST00000235372:VtoA;ENST00000311066:VtoA;ENST00000343137:VtoA;ENST00000235372:QtoR;ENST00000311066:QtoR;ENST00000343137:QtoR;ENST00000235372:KtoE;ENST00000311066:KtoE;ENST00000343137:KtoE;ENST00000235372:HtoR;ENST00000311066:HtoR;ENST00000343137:HtoR;ENST00000235372:EtoG;ENST00000311066:EtoG;ENST00000343137:EtoG;ENST00000235372:StoY;ENST00000311066:StoY;ENST00000343137:StoY;ENST00000235372:StoA;ENST00000311066:StoA;ENST00000343137:StoA;ENST00000235372:UtoA;ENST00000311066:UtoA;ENST00000343137:UtoA; | + | TtoC | 0.1111 | 0.1818 | 3  | 2  | [10,11]  |
| chr1:13978970   | PRDM2    | coding_exon | ENST00000235372:QtoR;ENST00000311066:QtoR;ENST00000343137:QtoR;ENST00000235372:KtoE;ENST00000311066:KtoE;ENST00000343137:KtoE;ENST00000235372:HtoR;ENST00000311066:HtoR;ENST00000343137:HtoR;ENST00000235372:EtoG;ENST00000311066:EtoG;ENST00000343137:EtoG;ENST00000235372:StoY;ENST00000311066:StoY;ENST00000343137:StoY;ENST00000235372:StoA;ENST00000311066:StoA;ENST00000343137:StoA;ENST00000235372:UtoA;ENST00000311066:UtoA;ENST00000343137:UtoA;                                                                | + | AtoG | 0.1    | 0.1818 | 2  | 2  | [10,11]  |
| chr1:13981129   | PRDM2    | coding_exon | ENST00000235372:KtoE;ENST00000311066:KtoE;ENST00000343137:KtoE;ENST00000235372:HtoR;ENST00000311066:HtoR;ENST00000343137:HtoR;ENST00000235372:EtoG;ENST00000311066:EtoG;ENST00000343137:EtoG;ENST00000235372:StoY;ENST00000311066:StoY;ENST00000343137:StoY;ENST00000235372:StoA;ENST00000311066:StoA;ENST00000343137:StoA;ENST00000235372:UtoA;ENST00000311066:UtoA;ENST00000343137:UtoA;                                                                                                                               | + | AtoG | 0.125  | 0.1667 | 2  | 2  | [12,16]  |
| chr1:13978379   | PRDM2    | coding_exon | ENST00000235372:HtoR;ENST00000311066:HtoR;ENST00000343137:HtoR;ENST00000235372:EtoG;ENST00000311066:EtoG;ENST00000343137:EtoG;ENST00000235372:StoY;ENST00000311066:StoY;ENST00000343137:StoY;ENST00000235372:StoA;ENST00000311066:StoA;ENST00000343137:StoA;ENST00000235372:UtoA;ENST00000311066:UtoA;ENST00000343137:UtoA;                                                                                                                                                                                              | + | AtoG | 0.1    | 0.1    | 2  | 2  | [10,11]  |
| chr1:13977827   | PRDM2    | coding_exon | ENST00000235372:EtoG;ENST00000311066:EtoG;ENST00000343137:EtoG;ENST00000235372:StoY;ENST00000311066:StoY;ENST00000343137:StoY;ENST00000235372:StoA;ENST00000311066:StoA;ENST00000343137:StoA;ENST00000235372:UtoA;ENST00000311066:UtoA;ENST00000343137:UtoA;                                                                                                                                                                                                                                                             | + | AtoG | 0.1    | 0.15   | 3  | 2  | [10,20]  |
| chr1:13978221   | PRDM2    | coding_exon | ENST00000235372:EtoG;ENST00000311066:EtoG;ENST00000343137:EtoG;ENST00000235372:StoY;ENST00000311066:StoY;ENST00000343137:StoY;ENST00000235372:StoA;ENST00000311066:StoA;ENST00000343137:StoA;ENST00000235372:UtoA;ENST00000311066:UtoA;ENST00000343137:UtoA;                                                                                                                                                                                                                                                             | + | TtoC | 0.1    | 0.1    | 3  | 2  | [10,10]  |
| chr1:13985773   | PRDM2    | mixed       |                                                                                                                                                                                                                                                                                                                                                                                                                                                                                                                          | + | TtoC | 0.1111 | 0.1176 | 3  | 2  | [17,18]  |
| chr1:13986214   | PRDM2    | mixed       |                                                                                                                                                                                                                                                                                                                                                                                                                                                                                                                          | + | CtoT | 0.1    | 0.1    | 2  | 2  | [10,10]  |
| chr19:12771996  | PRDX2    | coding_exon |                                                                                                                                                                                                                                                                                                                                                                                                                                                                                                                          | - | TtoC | 1      | 1      | 15 | 15 | [16,269] |
| chr19:12768642  | PRDX2    | UTR3        |                                                                                                                                                                                                                                                                                                                                                                                                                                                                                                                          | - | AtoG | 0.1    | 0.1795 | 4  | 4  | [10,39]  |
| chr6:105843439  | PREP     | coding_exon |                                                                                                                                                                                                                                                                                                                                                                                                                                                                                                                          | - | TtoC | 0.1    | 0.1176 | 2  | 2  | [10,17]  |
| chr6:105832372  | PREP     | UTR3        |                                                                                                                                                                                                                                                                                                                                                                                                                                                                                                                          | - | TtoA | 0.1    | 0.2    | 2  | 2  | [10,10]  |
| chr2:44419802   | PREPL    | coding_exon |                                                                                                                                                                                                                                                                                                                                                                                                                                                                                                                          | - | TtoC | 0.1    | 0.1111 | 5  | 2  | [10,18]  |
| chr20:46729329  | PREX1    | coding_exon | ENST00000371941:HtoP;ENST00000396220:HtoP;                                                                                                                                                                                                                                                                                                                                                                                                                                                                               | - | AtoC | 0.1429 | 0.2667 | 8  | 3  | [15,34]  |
| chr20:46675182  | PREX1    | UTR3        |                                                                                                                                                                                                                                                                                                                                                                                                                                                                                                                          | - | AtoG | 0.1111 | 0.1429 | 7  | 2  | [14,18]  |
| chr20:46675247  | PREX1    | UTR3        |                                                                                                                                                                                                                                                                                                                                                                                                                                                                                                                          | - | AtoC | 0.1489 | 0.2105 | 6  | 2  | [19,47]  |
| chr11:56913129  | PRG2     | coding_exon | ENST00000311862:VtoA;                                                                                                                                                                                                                                                                                                                                                                                                                                                                                                    | - | TtoC | 0.1    | 0.1818 | 2  | 2  | [10,11]  |
| chr5:40813424   | PRKAA1   | coding_exon | ENST00000296800:GtoE;ENST00000354209:GtoE;ENST00000397128:GtoE;                                                                                                                                                                                                                                                                                                                                                                                                                                                          | - | GtoA | 0.1    | 0.1    | 2  | 2  | [10,10]  |
| chr5:40803534   | PRKAA1   | coding_exon |                                                                                                                                                                                                                                                                                                                                                                                                                                                                                                                          | - | AtoG | 0.1    | 0.1429 | 2  | 2  | [10,14]  |
| chr12:118603215 | PRKAB1   | UTR3        |                                                                                                                                                                                                                                                                                                                                                                                                                                                                                                                          | + | TtoC | 0.1    | 0.1    | 2  | 2  | [10,10]  |
| chr19:14064944  | PRKACA   | coding_exon | ENST00000308677:KtoE;ENST00000350356:KtoE;                                                                                                                                                                                                                                                                                                                                                                                                                                                                               | - | AtoG | 0.1    | 0.1667 | 7  | 2  | [18,20]  |
| chr19:14064409  | PRKACA   | UTR3        |                                                                                                                                                                                                                                                                                                                                                                                                                                                                                                                          | - | TtoG | 0.1071 | 0.1176 | 2  | 2  | [17,28]  |
| chr12:47693156  | PRKAG1   | mixed       |                                                                                                                                                                                                                                                                                                                                                                                                                                                                                                                          | - | TtoG | 0.1    | 0.1053 | 2  | 2  | [10,19]  |
| chr17:64030649  | PRKAR1A  | coding_exon | ENST00000358598:StoY;ENST00000392710:StoY;ENST00000392711:StoY;                                                                                                                                                                                                                                                                                                                                                                                                                                                          | + | CtoA | 0.1    | 0.1029 | 5  | 2  | [68,80]  |
| chr17:64030648  | PRKAR1A  | coding_exon | ENST00000358598:StoA;ENST00000392710:StoA;ENST00000392711:StoA;                                                                                                                                                                                                                                                                                                                                                                                                                                                          | + | TtoG | 0.1169 | 0.2075 | 10 | 3  | [53,77]  |
| chr17:64038748  | PRKAR1A  | UTR3        |                                                                                                                                                                                                                                                                                                                                                                                                                                                                                                                          | + | TtoA | 0.1429 | 0.1429 | 5  | 2  | [14,28]  |
| chr17:64039437  | PRKAR1A  | UTR3        |                                                                                                                                                                                                                                                                                                                                                                                                                                                                                                                          | + | AtoG | 0.1304 | 0.2    | 11 | 5  | [10,24]  |
| chr17:64039739  | PRKAR1A  | UTR3        |                                                                                                                                                                                                                                                                                                                                                                                                                                                                                                                          | + | TtoC | 0.1    | 0.1053 | 9  | 2  | [19,20]  |
| chr17:64039745  | PRKAR1A  | UTR3        |                                                                                                                                                                                                                                                                                                                                                                                                                                                                                                                          | + | TtoA | 0.1    | 0.1818 | 5  | 4  | [10,23]  |
| chr17:64040239  | PRKAR1A  | UTR3        |                                                                                                                                                                                                                                                                                                                                                                                                                                                                                                                          | + | TtoG | 0.1    | 0.1    | 2  | 2  | [10,10]  |
| chr17:64040427  | PRKAR1A  | UTR3        |                                                                                                                                                                                                                                                                                                                                                                                                                                                                                                                          | + | CtoA | 0.1034 | 0.1667 | 2  | 2  | [12,29]  |
| chr17:64040428  | PRKAR1A  | UTR3        |                                                                                                                                                                                                                                                                                                                                                                                                                                                                                                                          | + | TtoG | 0.1176 | 0.125  | 4  | 2  | [18,32]  |
| chr3:48760251   | PRKAR2A  | UTR3        |                                                                                                                                                                                                                                                                                                                                                                                                                                                                                                                          | - | CtoG | 0.1    | 0.1    | 2  | 2  | [10,10]  |
| chr3:48763496   | PRKAR2A  | UTR3        |                                                                                                                                                                                                                                                                                                                                                                                                                                                                                                                          | - | TtoA | 0.1    | 0.1    | 2  | 2  | [10,10]  |
| chr16:24134452  | PRKCB    | mixed       |                                                                                                                                                                                                                                                                                                                                                                                                                                                                                                                          | + | GtoT | 0.1176 | 0.1429 | 2  | 2  | [14,17]  |
| chr16:24134797  | PRKCB    | mixed       |                                                                                                                                                                                                                                                                                                                                                                                                                                                                                                                          | + | TtoC | 0.1111 | 0.1111 | 3  | 2  | [18,27]  |
| chr16:24134802  | PRKCB    | mixed       |                                                                                                                                                                                                                                                                                                                                                                                                                                                                                                                          | + | AtoC | 0.1    | 0.1111 | 6  | 2  | [10,18]  |
| chr16:24134803  | PRKCB    | mixed       |                                                                                                                                                                                                                                                                                                                                                                                                                                                                                                                          | + | TtoA | 0.125  | 0.2    | 5  | 3  | [10,19]  |
| chr16:24138012  | PRKCB    | mixed       |                                                                                                                                                                                                                                                                                                                                                                                                                                                                                                                          | + | CtoA | 0.1176 | 0.12   | 3  | 2  | [17,25]  |
| chr16:24138013  | PRKCB    | mixed       |                                                                                                                                                                                                                                                                                                                                                                                                                                                                                                                          | + | TtoC | 0.1333 | 0.1364 | 3  | 2  | [16,22]  |
| chr16:24138366  | PRKCB    | mixed       |                                                                                                                                                                                                                                                                                                                                                                                                                                                                                                                          | + | TtoA | 0.1111 | 0.125  | 5  | 2  | [10,33]  |
| chr16:24139134  | PRKCB    | UTR3        |                                                                                                                                                                                                                                                                                                                                                                                                                                                                                                                          | + | AtoG | 0.1111 | 0.1429 | 4  | 2  | [14,18]  |
| chr3:53201540   | PRKCD    | UTR3        |                                                                                                                                                                                                                                                                                                                                                                                                                                                                                                                          | + | TtoC | 0.1    | 0.25   | 10 | 6  | [12,23]  |
| chr11:6297351   | PRKCDBP  | coding_exon | ENST00000303927:AtoD;                                                                                                                                                                                                                                                                                                                                                                                                                                                                                                    | - | CtoA | 0.1    | 0.1667 | 3  | 2  | [10,12]  |
| chr11:6297350   | PRKCDBP  | coding_exon |                                                                                                                                                                                                                                                                                                                                                                                                                                                                                                                          | - | CtoG | 0.1    | 0.1667 | 2  | 2  | [10,12]  |
| chr19:51869415  | PRKD2    | UTR3        |                                                                                                                                                                                                                                                                                                                                                                                                                                                                                                                          | - | GtoA | 0.1818 | 0.1818 | 2  | 2  | [11,11]  |
| chr19:51869418  | PRKD2    | UTR3        |                                                                                                                                                                                                                                                                                                                                                                                                                                                                                                                          | - | TtoC | 0.1    | 0.2727 | 4  | 2  | [10,11]  |
| chr19:51911760  | PRKD2    | UTR5        |                                                                                                                                                                                                                                                                                                                                                                                                                                                                                                                          | - | TtoA | 0.1    | 0.1    | 2  | 2  | [10,10]  |
| chr19:51911761  | PRKD2    | UTR5        |                                                                                                                                                                                                                                                                                                                                                                                                                                                                                                                          | - | TtoG | 0.1    | 0.1    | 2  | 2  | [10,10]  |

|                |         |             |                                                                                                                                                                                                                                                                                                                             |   |      |        |        |    |    |          |
|----------------|---------|-------------|-----------------------------------------------------------------------------------------------------------------------------------------------------------------------------------------------------------------------------------------------------------------------------------------------------------------------------|---|------|--------|--------|----|----|----------|
| chr8:48964177  | PRKDC   | coding_exon | ENST00000314191:YtoD;ENST00000338368:YtoD;                                                                                                                                                                                                                                                                                  | - | TtoG | 0.1    | 0.1    | 3  | 2  | [10,10]  |
| chr8:48915208  | PRKDC   | coding_exon | ENST00000314191:VtoA;ENST00000338368:VtoA;                                                                                                                                                                                                                                                                                  | - | TtoC | 0.1    | 0.1    | 2  | 2  | [10,10]  |
| chr8:4896783   | PRKDC   | coding_exon | ENST00000314191:TtoP;ENST00000338368:TtoP;                                                                                                                                                                                                                                                                                  | - | AtoC | 0.1    | 0.1765 | 4  | 2  | [10,17]  |
| chr8:48857348  | PRKDC   | coding_exon | ENST00000314191:LtoR;                                                                                                                                                                                                                                                                                                       | - | TtoG | 0.1    | 0.1034 | 7  | 2  | [10,29]  |
| chr8:48956544  | PRKDC   | coding_exon | ENST00000314191:DtoY;ENST00000338368:DtoY;                                                                                                                                                                                                                                                                                  | - | GtoT | 0.1    | 0.1    | 2  | 2  | [10,20]  |
| chr8:48848755  | PRKDC   | UTR3        |                                                                                                                                                                                                                                                                                                                             | - | TtoA | 0.1    | 0.1818 | 2  | 2  | [10,11]  |
| chr10:53127582 | PRKG1   | coding_exon |                                                                                                                                                                                                                                                                                                                             | + | AtoT | 0.1    | 0.1429 | 2  | 2  | [10,14]  |
| chr2:179005012 | PRKRA   | UTR3        |                                                                                                                                                                                                                                                                                                                             | - | TtoA | 0.1429 | 0.1667 | 3  | 2  | [12,14]  |
| chr19:54883513 | PRMT1   | UTR3        |                                                                                                                                                                                                                                                                                                                             | + | TtoC | 0.1    | 0.3    | 12 | 5  | [10,25]  |
| chr4:148813601 | PRMT10  | coding_exon |                                                                                                                                                                                                                                                                                                                             | - | GtoT | 0.1    | 0.1    | 2  | 2  | [10,10]  |
| chr1:107402447 | PRMT6   | mixed       |                                                                                                                                                                                                                                                                                                                             | + | TtoA | 0.1    | 0.1667 | 4  | 2  | [10,12]  |
| chr16:66931289 | PRMT7   | coding_exon | ENST00000339507:WtoR;ENST00000348497:WtoR;ENST00000441236:WtoR;ENST00000339507:RtoK;ENST00000348497:RtoK;ENST00000441236:RtoK;ENST00000339507:YtoD;ENST00000348497:YtoD;ENST00000441236:YtoD;                                                                                                                               | + | TtoC | 0.1    | 0.1176 | 3  | 2  | [10,17]  |
| chr16:66912865 | PRMT7   | coding_exon | ENST00000339507:RtoK;ENST00000348497:RtoK;ENST00000441236:RtoK;ENST00000339507:YtoD;ENST00000348497:YtoD;ENST00000441236:YtoD;                                                                                                                                                                                              | + | GtoA | 0.1053 | 0.125  | 6  | 2  | [16,19]  |
| chr11:60430606 | PRPF19  | UTR5        |                                                                                                                                                                                                                                                                                                                             | - | GtoT | 0.1    | 0.2    | 2  | 2  | [10,10]  |
| chr1:148583550 | PRPF3   | coding_exon | ENST00000324862:NtoD;ENST00000414970:NtoD;                                                                                                                                                                                                                                                                                  | + | AtoG | 0.1    | 0.2    | 2  | 2  | [10,10]  |
| chr1:148571780 | PRPF3   | coding_exon | ENST00000324862:IttoS;ENST00000414970:IttoS;                                                                                                                                                                                                                                                                                | + | TtoG | 0.1333 | 0.2353 | 3  | 2  | [15,17]  |
| chr1:148592264 | PRPF3   | UTR3        |                                                                                                                                                                                                                                                                                                                             | + | TtoG | 0.1    | 0.2    | 3  | 2  | [10,11]  |
| chr1:52655038  | PRPF38A | UTR3        |                                                                                                                                                                                                                                                                                                                             | + | TtoA | 0.1111 | 0.1538 | 5  | 3  | [10,15]  |
| chr1:52655282  | PRPF38A | UTR3        |                                                                                                                                                                                                                                                                                                                             | + | TtoA | 0.1    | 0.45   | 15 | 11 | [13,24]  |
| chr1:52655283  | PRPF38A | UTR3        |                                                                                                                                                                                                                                                                                                                             | + | TtoA | 0.1333 | 0.3571 | 12 | 3  | [14,15]  |
| chr1:52655703  | PRPF38A | UTR3        |                                                                                                                                                                                                                                                                                                                             | + | AtoG | 0.1    | 0.125  | 4  | 2  | [10,16]  |
| chr1:109040479 | PRPF38B | coding_exon | ENST00000370021:EttoD;ENST00000370022:EttoD;ENST00000370025:EttoD;                                                                                                                                                                                                                                                          | + | AtoT | 0.1034 | 0.1053 | 7  | 2  | [19,29]  |
| chr1:109040481 | PRPF38B | coding_exon | ENST00000370021:EttoA;ENST00000370022:EttoA;ENST00000370025:EttoA;                                                                                                                                                                                                                                                          | + | AtoC | 0.1    | 0.1429 | 10 | 4  | [17,21]  |
| chr14:44649047 | PRPF39  | mixed       |                                                                                                                                                                                                                                                                                                                             | + | TtoG | 0.2    | 0.4545 | 6  | 4  | [10,12]  |
| chr9:115094711 | PRPF4   | UTR3        |                                                                                                                                                                                                                                                                                                                             | + | AtoC | 0.1    | 0.1429 | 3  | 2  | [10,14]  |
| chr2:153228981 | PRPF40A | coding_exon | ENST00000356402:QtoR;ENST00000359961:QtoR;ENST00000410080:QtoR;ENST00000356402:RtoS;ENST00000359961:RtoS;ENST00000410080:RtoS;                                                                                                                                                                                              | - | AtoG | 0.1111 | 0.1111 | 4  | 2  | [18,18]  |
| chr2:153220788 | PRPF40A | UTR3        |                                                                                                                                                                                                                                                                                                                             | - | AtoC | 0.1053 | 0.1333 | 2  | 2  | [15,19]  |
| chr12:48317520 | PRPF40B | coding_exon | ENST00000261897:TtoA;ENST00000341308:TtoA;ENST00000380281:TtoA;ENST00000261897:NtoS;ENST00000341308:NtoS;ENST00000380281:NtoS;ENST00000261897:RtoK;ENST00000341308:RtoK;ENST00000380281:RtoK;ENST00000261897:YtoD;ENST00000341308:YtoD;ENST00000380281:YtoD;                                                                | + | AtoG | 0.1538 | 0.5    | 4  | 4  | [10,15]  |
| chr12:48321983 | PRPF40B | coding_exon | ENST00000261897:NtoS;ENST00000341308:NtoS;ENST00000380281:NtoS;ENST00000261897:RtoK;ENST00000341308:RtoK;ENST00000380281:RtoK;ENST00000261897:YtoD;ENST00000341308:YtoD;ENST00000380281:YtoD;                                                                                                                               | + | AtoG | 0.1053 | 0.25   | 12 | 9  | [16,53]  |
| chr12:48321984 | PRPF40B | coding_exon | ENST00000261897:NtoK;ENST00000341308:NtoK;ENST00000380281:NtoK;ENST00000261897:RtoS;ENST00000341308:RtoS;ENST00000380281:RtoS;ENST00000261897:YtoD;ENST00000341308:YtoD;ENST00000380281:YtoD;                                                                                                                               | + | CtoG | 0.1053 | 0.1667 | 10 | 6  | [15,57]  |
| chr12:48322992 | PRPF40B | coding_exon | ENST00000261897:HtoN;ENST00000341308:HtoN;ENST00000380281:HtoN;ENST00000261897:NtoS;ENST00000341308:NtoS;ENST00000380281:NtoS;ENST00000261897:RtoK;ENST00000341308:RtoK;ENST00000380281:RtoK;ENST00000261897:YtoD;ENST00000341308:YtoD;ENST00000380281:YtoD;                                                                | + | CtoA | 0.1    | 0.2    | 3  | 3  | [10,24]  |
| chr12:48316895 | PRPF40B | coding_exon | ENST00000261897:FtoS;ENST00000341308:FtoS;ENST00000380281:FtoS;ENST00000261897:RtoK;ENST00000341308:RtoK;ENST00000380281:RtoK;ENST00000261897:YtoD;ENST00000341308:YtoD;ENST00000380281:YtoD;                                                                                                                               | + | TtoC | 0.1    | 0.1875 | 8  | 4  | [10,16]  |
| chr12:48316896 | PRPF40B | coding_exon |                                                                                                                                                                                                                                                                                                                             | + | CtoT | 0.1    | 0.25   | 10 | 5  | [10,17]  |
| chr12:48321221 | PRPF40B | coding_exon |                                                                                                                                                                                                                                                                                                                             | + | TtoA | 0.125  | 0.125  | 4  | 2  | [16,24]  |
| chr12:48321600 | PRPF40B | coding_exon |                                                                                                                                                                                                                                                                                                                             | + | CtoA | 0.1053 | 0.125  | 5  | 2  | [16,19]  |
| chr12:48323468 | PRPF40B | coding_exon |                                                                                                                                                                                                                                                                                                                             | + | TtoC | 0.15   | 0.1667 | 4  | 3  | [12,20]  |
| chr12:48324680 | PRPF40B | UTR3        |                                                                                                                                                                                                                                                                                                                             | + | GtoT | 0.1    | 0.1    | 2  | 2  | [10,10]  |
| chr6:3987728   | PRPF4B  | coding_exon | ENST00000337659:DtoV;                                                                                                                                                                                                                                                                                                       | + | AtoT | 0.1    | 0.1429 | 2  | 2  | [10,14]  |
| chr17:1500709  | PRPF8   | UTR3        |                                                                                                                                                                                                                                                                                                                             | - | TtoG | 0.1111 | 0.125  | 7  | 2  | [10,26]  |
| chr17:71818639 | PRPSA1  | UTR3        |                                                                                                                                                                                                                                                                                                                             | - | TtoC | 0.1111 | 0.2083 | 2  | 2  | [10,24]  |
| chr17:18721825 | PRPSA2  | coding_exon | ENST00000268835:YtoS;ENST00000395656:YtoS;ENST00000419071:YtoS;                                                                                                                                                                                                                                                             | + | AtoC | 0.1333 | 0.2222 | 2  | 2  | [16,18]  |
| chr17:18774922 | PRPSA2  | UTR3        |                                                                                                                                                                                                                                                                                                                             | + | AtoG | 0.1    | 0.1429 | 5  | 2  | [14,20]  |
| chr17:18774972 | PRPSA2  | UTR3        |                                                                                                                                                                                                                                                                                                                             | + | TtoC | 0.1538 | 0.1818 | 8  | 2  | [11,13]  |
| chr19:54789801 | PRR12   | coding_exon | ENST00000418929:StoP;                                                                                                                                                                                                                                                                                                       | + | TtoC | 0.1667 | 0.1818 | 2  | 2  | [11,12]  |
| chr12:52126682 | PRR13   | UTR3        |                                                                                                                                                                                                                                                                                                                             | + | TtoC | 0.1429 | 0.2857 | 2  | 2  | [14,15]  |
| chr19:47498319 | PRR19   | UTR5        |                                                                                                                                                                                                                                                                                                                             | + | TtoC | 0.1    | 0.1818 | 5  | 4  | [11,49]  |
| chr6:30639279  | PRR3    | UTR3        |                                                                                                                                                                                                                                                                                                                             | + | TtoC | 0.1429 | 0.1538 | 7  | 3  | [13,14]  |
| chr6:30639281  | PRR3    | UTR3        |                                                                                                                                                                                                                                                                                                                             | + | GtoA | 0.1    | 0.1    | 3  | 2  | [10,10]  |
| chr5:176815373 | PRR7    | coding_exon | ENST00000323249:VtoG;ENST00000355386:VtoG;                                                                                                                                                                                                                                                                                  | + | TtoG | 0.1818 | 0.2    | 3  | 2  | [10,11]  |
| chr5:126888126 | PRRC1   | coding_exon |                                                                                                                                                                                                                                                                                                                             | + | AtoG | 0.1    | 0.1538 | 3  | 2  | [10,13]  |
| chr5:126915608 | PRRC1   | mixed       |                                                                                                                                                                                                                                                                                                                             | + | TtoA | 0.1    | 0.1    | 2  | 2  | [10,10]  |
| chr5:126917660 | PRRC1   | UTR3        |                                                                                                                                                                                                                                                                                                                             | + | TtoG | 0.1    | 0.1    | 3  | 2  | [10,10]  |
| chr3:9963279   | PRRT3   | coding_exon | ENST00000295984:IttoL;ENST00000412055:IttoL;                                                                                                                                                                                                                                                                                | - | AtoC | 1      | 1      | 4  | 4  | [10,33]  |
| chr3:9963475   | PRRT3   | coding_exon |                                                                                                                                                                                                                                                                                                                             | - | AtoG | 0.1    | 0.1    | 2  | 2  | [10,10]  |
| chr3:9965473   | PRRT3   | coding_exon |                                                                                                                                                                                                                                                                                                                             | - | AtoG | 0.1    | 0.1429 | 2  | 2  | [10,14]  |
| chr1:149274491 | PRUNE   | UTR3        |                                                                                                                                                                                                                                                                                                                             | + | AtoG | 0.1333 | 0.2    | 5  | 3  | [10,15]  |
| chr10:73251776 | PSAP    | coding_exon | ENST00000394934:LtoV;                                                                                                                                                                                                                                                                                                       | - | CtoG | 0.1053 | 0.3846 | 7  | 5  | [10,19]  |
| chr10:73251775 | PSAP    | coding_exon | ENST00000394934:LtoH;                                                                                                                                                                                                                                                                                                       | - | TtoA | 0.1    | 0.3846 | 4  | 2  | [10,13]  |
| chr10:73246063 | PSAP    | UTR3        |                                                                                                                                                                                                                                                                                                                             | - | AtoG | 0.1    | 0.1875 | 5  | 3  | [10,17]  |
| chr14:72729299 | PSEN1   | coding_exon | ENST00000261970:LtoH;ENST00000324501:LtoH;ENST00000344094:LtoH;ENST00000261970:NtoS;ENST00000324501:NtoS;ENST00000344094:NtoS;ENST00000261970:RtoK;ENST00000324501:RtoK;ENST00000344094:RtoK;ENST00000261970:YtoD;ENST00000324501:YtoD;ENST00000344094:YtoD;                                                                | + | TtoA | 0.1818 | 0.2    | 3  | 2  | [11,11]  |
| chr14:72756715 | PSEN1   | UTR3        |                                                                                                                                                                                                                                                                                                                             | + | AtoG | 0.1111 | 0.1818 | 4  | 2  | [11,18]  |
| chr1:225144382 | PSEN2   | coding_exon | ENST00000366782:KtoE;ENST00000366783:KtoE;ENST00000391872:KtoE;ENST00000366782:NtoS;ENST00000366783:NtoS;ENST00000391872:NtoS;ENST00000366782:RtoK;ENST00000366783:RtoK;ENST00000391872:RtoK;ENST00000366782:YtoD;ENST00000366783:YtoD;ENST00000391872:YtoD;                                                                | + | AtoG | 0.1    | 0.1    | 2  | 2  | [10,10]  |
| chr11:14483116 | PSMA1   | UTR3        |                                                                                                                                                                                                                                                                                                                             | - | TtoC | 0.1169 | 0.1786 | 4  | 2  | [29,80]  |
| chr15:76628588 | PSMA4   | UTR3        |                                                                                                                                                                                                                                                                                                                             | + | AtoG | 0.1    | 0.1667 | 2  | 2  | [10,12]  |
| chr1:109770561 | PSMA5   | mixed       |                                                                                                                                                                                                                                                                                                                             | - | AtoT | 0.1    | 0.1765 | 5  | 2  | [11,17]  |
| chr1:109770563 | PSMA5   | mixed       |                                                                                                                                                                                                                                                                                                                             | - | TtoG | 0.1    | 0.1538 | 4  | 2  | [10,13]  |
| chr14:34856415 | PSMA6   | UTR3        |                                                                                                                                                                                                                                                                                                                             | + | AtoG | 0.1    | 0.1818 | 4  | 3  | [10,11]  |
| chr16:66525921 | PSMB10  | UTR3        |                                                                                                                                                                                                                                                                                                                             | - | AtoG | 0.1333 | 0.2    | 3  | 2  | [10,15]  |
| chr16:66525923 | PSMB10  | UTR3        |                                                                                                                                                                                                                                                                                                                             | - | AtoG | 0.1053 | 0.1364 | 14 | 5  | [19,54]  |
| chr1:35840005  | PSMB2   | UTR3        |                                                                                                                                                                                                                                                                                                                             | - | TtoA | 0.1    | 0.1111 | 5  | 2  | [18,20]  |
| chr1:149641004 | PSMB4   | UTR3        |                                                                                                                                                                                                                                                                                                                             | + | TtoG | 0.1667 | 0.2    | 7  | 2  | [12,21]  |
| chr1:149638680 | PSMB4   | UTR5        |                                                                                                                                                                                                                                                                                                                             | + | TtoG | 0.1    | 0.1    | 2  | 2  | [10,20]  |
| chr1:149638681 | PSMB4   | UTR5        |                                                                                                                                                                                                                                                                                                                             | + | GtoC | 0.1    | 0.1818 | 2  | 2  | [10,12]  |
| chr9:126155567 | PSMB7   | UTR3        |                                                                                                                                                                                                                                                                                                                             | - | TtoA | 0.1818 | 0.2222 | 5  | 2  | [10,12]  |
| chr9:126155568 | PSMB7   | UTR3        |                                                                                                                                                                                                                                                                                                                             | - | CtoA | 0.1    | 0.3077 | 8  | 3  | [10,15]  |
| chr9:126155569 | PSMB7   | UTR3        |                                                                                                                                                                                                                                                                                                                             | - | GtoA | 0.1    | 0.3    | 11 | 6  | [10,19]  |
| chr9:126155570 | PSMB7   | UTR3        |                                                                                                                                                                                                                                                                                                                             | - | AtoG | 0.1    | 0.125  | 7  | 2  | [10,16]  |
| chr6:32933029  | PSMB9   | coding_exon | ENST00000374859:VtoG;ENST00000395330:VtoG;ENST00000453265:VtoG;                                                                                                                                                                                                                                                             | + | TtoG | 0.1    | 0.1624 | 4  | 2  | [60,435] |
| chr6:32935334  | PSMB9   | mixed       |                                                                                                                                                                                                                                                                                                                             | + | GtoA | 0.12   | 0.1667 | 4  | 3  | [15,25]  |
| chr6:32935337  | PSMB9   | mixed       |                                                                                                                                                                                                                                                                                                                             | + | AtoG | 0.1064 | 0.375  | 18 | 14 | [15,47]  |
| chr6:32935338  | PSMB9   | mixed       |                                                                                                                                                                                                                                                                                                                             | + | AtoG | 0.1333 | 0.2    | 8  | 2  | [10,16]  |
| chr6:32935339  | PSMB9   | mixed       |                                                                                                                                                                                                                                                                                                                             | + | AtoG | 0.1    | 0.1053 | 5  | 2  | [10,19]  |
| chr6:32935344  | PSMB9   | mixed       |                                                                                                                                                                                                                                                                                                                             | + | GtoA | 0.1176 | 0.1176 | 2  | 2  | [17,17]  |
| chr6:32935446  | PSMB9   | mixed       |                                                                                                                                                                                                                                                                                                                             | + | GtoA | 0.1    | 0.1818 | 4  | 3  | [10,16]  |
| chr6:32935541  | PSMB9   | mixed       |                                                                                                                                                                                                                                                                                                                             | + | AtoT | 0.2    | 0.3    | 2  | 2  | [10,10]  |
| chr11:47396904 | PSMC3   | UTR3        |                                                                                                                                                                                                                                                                                                                             | - | GtoA | 0.1    | 0.1538 | 9  | 4  | [10,26]  |
| chr2:161976399 | PSMD14  | UTR3        |                                                                                                                                                                                                                                                                                                                             | + | AtoG | 0.1111 | 0.1429 | 7  | 3  | [14,19]  |
| chr3:185507243 | PSMD2   | coding_exon | ENST00000310118:VtoG;ENST00000435761:VtoG;ENST00000439383:VtoG;                                                                                                                                                                                                                                                             | + | TtoG | 0.1143 | 0.1184 | 5  | 2  | [80,140] |
| chr17:35407730 | PSMD3   | UTR3        |                                                                                                                                                                                                                                                                                                                             | + | TtoC | 0.1    | 0.2727 | 5  | 4  | [10,19]  |
| chr1:149506399 | PSMD4   | coding_exon | ENST00000368881:TtoA;ENST00000368884:TtoA;ENST00000418119:TtoA;ENST00000368881:NtoS;ENST00000368884:NtoS;ENST00000418119:NtoS;ENST00000368881:RtoK;ENST00000368884:RtoK;ENST00000418119:RtoK;ENST00000368881:YtoD;ENST00000368884:YtoD;ENST00000418119:YtoD;                                                                | + | AtoG | 0.1    | 0.1667 | 2  | 2  | [10,13]  |
| chr1:149506394 | PSMD4   | coding_exon | ENST00000368881:QtoP;ENST00000368884:QtoP;ENST00000418119:QtoP;ENST00000368881:FtoI;ENST00000368884:FtoI;ENST00000418119:FtoI;ENST00000368881:NtoS;ENST00000368884:NtoS;ENST00000418119:NtoS;ENST00000368881:RtoK;ENST00000368884:RtoK;ENST00000418119:RtoK;ENST00000368881:YtoD;ENST00000368884:YtoD;ENST00000418119:YtoD; | + | AtoC | 0.1    | 0.1538 | 2  | 2  | [11,13]  |
| chr1:149506309 | PSMD4   | coding_exon | ENST00000368881:FtoI;ENST00000368884:FtoI;ENST00000418119:FtoI;ENST00000368881:NtoS;ENST00000368884:NtoS;ENST00000418119:NtoS;ENST00000368881:RtoK;ENST00000368884:RtoK;ENST00000418119:RtoK;ENST00000368881:YtoD;ENST00000368884:YtoD;ENST00000418119:YtoD;                                                                | + | TtoA | 0.1071 | 0.1786 | 7  | 5  | [19,30]  |
| chr1:149506430 | PSMD4   | coding_exon | ENST00000368881:EttoA;ENST00000368884:EttoA;ENST00000418119:EttoA;ENST00000368881:NtoS;ENST00000368884:NtoS;ENST00000418119:NtoS;ENST00000368881:RtoK;ENST00000368884:RtoK;ENST00000418119:RtoK;ENST00000368881:YtoD;ENST00000368884:YtoD;ENST00000418119:YtoD;                                                             | + | AtoC | 0.1    | 0.6875 | 5  | 3  | [10,23]  |
| chr1:149506406 | PSMD4   | coding_exon | ENST00000368881:EttoA;ENST00000368884:EttoA;ENST00000418119:EttoA;ENST00000368881:NtoS;ENST00000368884:NtoS;ENST00000418119:NtoS;ENST00000368881:RtoK;ENST00000368884:RtoK;ENST00000418119:RtoK;ENST00000368881:YtoD;ENST00000368884:                                                                                       |   |      |        |        |    |    |          |

|                 |         |             |                                                                                      |   |      |        |        |    |    |           |
|-----------------|---------|-------------|--------------------------------------------------------------------------------------|---|------|--------|--------|----|----|-----------|
| chr1:149501316  | PSMD4   | mixed       |                                                                                      | + | GtoA | 0.1053 | 0.2143 | 3  | 2  | [14,19]   |
| chr1:149501318  | PSMD4   | mixed       |                                                                                      | + | CtoG | 0.1    | 0.1071 | 4  | 2  | [10,28]   |
| chr1:149501320  | PSMD4   | mixed       |                                                                                      | + | Atog | 0.1579 | 0.2143 | 6  | 4  | [15,22]   |
| chr1:149501330  | PSMD4   | mixed       |                                                                                      | + | TtoA | 0.1429 | 0.1538 | 6  | 2  | [13,14]   |
| chr1:149503099  | PSMD4   | mixed       |                                                                                      | + | Atog | 0.1    | 0.1333 | 7  | 2  | [10,16]   |
| chr1:149504291  | PSMD4   | mixed       |                                                                                      | + | Atog | 0.1    | 0.1    | 3  | 2  | [10,10]   |
| chr1:149505434  | PSMD4   | mixed       |                                                                                      | + | Atoc | 0.1    | 0.125  | 2  | 2  | [10,16]   |
| chr1:149505461  | PSMD4   | mixed       |                                                                                      | + | Atog | 0.1111 | 0.1875 | 5  | 2  | [16,18]   |
| chr1:149506499  | PSMD4   | UTR3        |                                                                                      | + | Atog | 0.1    | 0.1304 | 9  | 2  | [20,23]   |
| chr14:23677620  | PSME1   | coding_exon | ENST00000382708:QtoR;                                                                | + | Atog | 0.1    | 0.1111 | 4  | 2  | [10,10]   |
| chr14:23678010  | PSME1   | UTR3        |                                                                                      | + | CtoA | 0.1667 | 0.2    | 4  | 2  | [10,12]   |
| chr14:23678012  | PSME1   | UTR3        |                                                                                      | + | CtoA | 0.7    | 0.7778 | 2  | 2  | [10,10]   |
| chr14:23683244  | PSME2   | coding_exon | ENST00000216802:StoC;ENST00000396881:StoC;ENST00000429021:StoC;                      | - | CtoG | 0.1    | 0.125  | 6  | 2  | [10,16]   |
| chr14:23682645  | PSME2   | coding_exon | ENST00000216802:RtoW;ENST00000396881:RtoW;ENST00000429021:RtoW;                      | - | Atot | 0.1    | 0.2    | 2  | 2  | [10,10]   |
| chr14:23684322  | PSME2   | coding_exon | ENST00000216802:MtoV;ENST00000396881:MtoV;ENST00000429021:MtoV;                      | - | Atog | 0.1053 | 0.1818 | 3  | 3  | [10,19]   |
| chr14:23682660  | PSME2   | coding_exon | ENST00000216802:MtoL;ENST00000396881:MtoL;ENST00000429021:MtoL;                      | - | Atot | 0.25   | 0.4286 | 3  | 3  | [12,17]   |
| chr14:23682668  | PSME2   | coding_exon | ENST00000216802:LtoP;ENST00000396881:LtoP;ENST00000429021:LtoP;                      | - | TtoC | 0.1111 | 0.2432 | 10 | 9  | [16,52]   |
| chr14:23683278  | PSME2   | coding_exon | ENST00000216802:KtoE;ENST00000396881:KtoE;ENST00000429021:KtoE;                      | - | Atog | 0.1    | 0.1818 | 10 | 3  | [11,20]   |
| chr14:23684195  | PSME2   | coding_exon | ENST00000216802:CtoS;ENST00000396881:CtoS;ENST00000429021:CtoS;                      | - | GtoC | 0.1    | 0.1538 | 4  | 2  | [10,13]   |
| chr14:23682662  | PSME2   | coding_exon | ENST00000216802:AtoD;ENST00000396881:AtoD;ENST00000429021:AtoD;                      | - | CtoA | 0.1    | 0.4167 | 7  | 5  | [10,15]   |
| chr14:23683262  | PSME2   | coding_exon | ENST00000216802:AtoD;ENST00000396881:AtoD;ENST00000429021:AtoD;                      | - | CtoA | 0.1    | 0.1667 | 4  | 2  | [10,12]   |
| chr14:23682664  | PSME2   | coding_exon |                                                                                      | - | GtoA | 0.1081 | 0.225  | 10 | 7  | [22,40]   |
| chr14:23683063  | PSME2   | coding_exon |                                                                                      | - | TtoG | 0.102  | 0.1429 | 8  | 3  | [19,52]   |
| chr14:23683264  | PSME2   | coding_exon |                                                                                      | - | Atog | 0.1    | 0.125  | 8  | 2  | [10,16]   |
| chr14:23683279  | PSME2   | coding_exon |                                                                                      | - | CtoG | 0.1667 | 0.4211 | 11 | 6  | [12,41]   |
| chr14:23682413  | PSME2   | UTR3        |                                                                                      | - | TtoA | 0.9    | 0.9836 | 7  | 7  | [20,67]   |
| chr17:38240075  | PSME3   | coding_exon |                                                                                      | + | Atog | 0.1064 | 0.1333 | 6  | 2  | [15,47]   |
| chr2:53976258   | PSME4   | mixed       |                                                                                      | - | GtoA | 0.1176 | 0.1538 | 4  | 2  | [13,17]   |
| chr2:53999792   | PSME4   | mixed       |                                                                                      | - | TtoG | 0.1    | 0.1    | 2  | 2  | [10,10]   |
| chr13:19149868  | PSPC1   | UTR3        |                                                                                      | - | TtoC | 0.1    | 0.1818 | 3  | 2  | [10,11]   |
| chr7:56056319   | PSPH    | coding_exon | ENST00000275605:RtoS;ENST00000395471:RtoS;                                           | - | Atot | 0.6364 | 0.7358 | 2  | 2  | [44,53]   |
| chr10:124744163 | PSTK    | mixed       |                                                                                      | + | TtoC | 0.1053 | 0.1667 | 2  | 2  | [12,19]   |
| chr1:28350077   | PTAFR   | mixed       |                                                                                      | - | TtoC | 0.1    | 0.1176 | 3  | 2  | [10,17]   |
| chr19:755407    | PTBP1   | coding_exon | ENST00000349038:EtoG;ENST00000356948:EtoG;ENST00000394601:EtoG;                      | + | Atog | 0.1739 | 0.28   | 3  | 2  | [23,25]   |
| chr19:750431    | PTBP1   | coding_exon |                                                                                      | + | CtoA | 0.1818 | 0.3684 | 3  | 2  | [11,19]   |
| chr19:762320    | PTBP1   | UTR3        |                                                                                      | + | CtoT | 0.3534 | 0.4364 | 2  | 2  | [110,116] |
| chr19:763311    | PTBP1   | UTR3        |                                                                                      | + | TtoC | 0.1053 | 0.362  | 11 | 11 | [18,36]   |
| chr19:763313    | PTBP1   | UTR3        |                                                                                      | + | GtoA | 0.1053 | 0.4706 | 13 | 13 | [12,31]   |
| chr2:86207937   | PTCD3   | mixed       |                                                                                      | + | TtoG | 0.1111 | 0.12   | 5  | 2  | [18,25]   |
| chr2:86221715   | PTCD3   | UTR3        |                                                                                      | + | TtoC | 0.1    | 0.1    | 2  | 2  | [10,10]   |
| chr2:86222007   | PTCD3   | UTR3        |                                                                                      | + | TtoA | 0.1    | 0.1    | 2  | 2  | [10,11]   |
| chr10:89717058  | PTEN    | UTR3        |                                                                                      | + | Atot | 0.1    | 0.15   | 3  | 2  | [10,20]   |
| chr10:89613600  | PTEN    | UTR5        |                                                                                      | + | TtoC | 0.1    | 0.1111 | 3  | 3  | [19,66]   |
| chr8:27352808   | PTK2B   | coding_exon | ENST00000338238:TtoP;ENST00000346049:TtoP;ENST00000397497:TtoP;ENST00000397497:TtoP; | + | Atoc | 0.1143 | 0.1584 | 2  | 2  | [102,105] |
| chr8:27372811   | PTK2B   | UTR3        |                                                                                      | + | TtoC | 0.2727 | 0.3    | 3  | 2  | [10,11]   |
| chr8:27239007   | PTK2B   | UTR5        |                                                                                      | + | CtoT | 0.1579 | 0.3125 | 2  | 2  | [16,19]   |
| chr2:232284316  | PTMA    | coding_exon | ENST00000358839:EtoK;                                                                | + | GtoA | 0.1333 | 0.16   | 7  | 3  | [15,25]   |
| chr2:232284326  | PTMA    | coding_exon | ENST00000341369:VtoL;ENST00000358839:VtoL;ENST00000409115:VtoL;ENST00000409115:VtoL; | + | GtoC | 0.1176 | 0.2    | 9  | 6  | [13,25]   |
| chr2:232285767  | PTMA    | coding_exon | ENST00000341369:VtoI;ENST00000358839:VtoI;ENST00000409115:VtoI;ENST00000409115:VtoI; | + | GtoA | 0.1818 | 0.3103 | 2  | 2  | [11,29]   |
| chr2:232284324  | PTMA    | coding_exon | ENST00000341369:VtoD;ENST00000409115:VtoD;ENST00000409321:VtoD;ENST00000409321:VtoD; | + | TtoA | 0.1818 | 0.1818 | 7  | 2  | [11,12]   |
| chr2:232284315  | PTMA    | coding_exon | ENST00000341369:KtoR;ENST00000409115:KtoR;ENST00000409321:KtoR;ENST00000409321:KtoR; | + | Atog | 0.1053 | 0.1538 | 10 | 4  | [13,26]   |
| chr2:232284937  | PTMA    | coding_exon | ENST00000341369:GtoC;ENST00000358839:GtoC;ENST00000409115:GtoC;ENST00000409115:GtoC; | + | GtoT | 0.1    | 0.1538 | 17 | 4  | [14,36]   |
| chr2:232284320  | PTMA    | coding_exon | ENST00000341369:EtoK;ENST00000358839:GtoE;ENST00000409115:EtoK;ENST00000409115:EtoK; | + | GtoA | 0.1    | 0.1364 | 11 | 4  | [10,23]   |
| chr2:232285469  | PTMA    | coding_exon | ENST00000341369:EtoG;ENST00000358839:GtoG;ENST00000409115:EtoG;ENST00000409115:EtoG; | + | Atog | 0.1    | 0.1667 | 7  | 5  | [18,42]   |
| chr2:232285762  | PTMA    | coding_exon | ENST00000341369:DtoG;ENST00000358839:DtoG;ENST00000409115:DtoG;ENST00000409115:DtoG; | + | Atog | 0.1111 | 0.3333 | 10 | 6  | [12,30]   |
| chr2:232284936  | PTMA    | coding_exon | ENST00000341369:DtoE;ENST00000358839:DtoE;ENST00000409115:DtoE;ENST00000409115:DtoE; | + | TtoA | 0.1053 | 0.2143 | 12 | 5  | [15,29]   |
| chr2:232285410  | PTMA    | coding_exon | ENST00000341369:DtoE;ENST00000358839:DtoE;ENST00000409115:DtoE;ENST00000409115:DtoE; | + | TtoG | 0.1081 | 0.2174 | 10 | 4  | [15,40]   |
| chr2:232285464  | PTMA    | coding_exon | ENST00000341369:DtoE;ENST00000358839:DtoE;ENST00000409115:DtoE;ENST00000409115:DtoE; | + | TtoG | 0.1    | 0.1034 | 11 | 3  | [29,59]   |
| chr2:232285766  | PTMA    | coding_exon | ENST00000341369:DtoE;ENST00000358839:DtoE;ENST00000409115:DtoE;ENST00000409115:DtoE; | + | TtoG | 0.2    | 0.5    | 3  | 3  | [10,36]   |
| chr2:232285793  | PTMA    | coding_exon | ENST00000341369:DtoE;ENST00000358839:DtoE;ENST00000409115:DtoE;ENST00000409115:DtoE; | + | CtoG | 0.1111 | 0.1304 | 4  | 2  | [18,24]   |
| chr2:232285398  | PTMA    | coding_exon |                                                                                      | + | TtoG | 0.1081 | 0.2903 | 15 | 8  | [18,67]   |
| chr2:232281481  | PTMA    | mixed       |                                                                                      | + | CtoT | 0.1176 | 0.1429 | 2  | 2  | [14,17]   |
| chr2:232281484  | PTMA    | mixed       |                                                                                      | + | Atog | 0.1    | 0.1053 | 2  | 2  | [10,19]   |
| chr2:232281490  | PTMA    | mixed       |                                                                                      | + | TtoC | 0.1429 | 0.1818 | 5  | 2  | [11,21]   |
| chr2:232281492  | PTMA    | mixed       |                                                                                      | + | CtoA | 0.1395 | 0.4    | 4  | 4  | [22,66]   |
| chr2:232281614  | PTMA    | mixed       |                                                                                      | + | TtoC | 0.1    | 0.1538 | 4  | 3  | [10,26]   |
| chr2:232281619  | PTMA    | mixed       |                                                                                      | + | TtoG | 0.25   | 0.6    | 3  | 2  | [10,21]   |
| chr2:232285991  | PTMA    | UTR3        |                                                                                      | + | CtoA | 0.1034 | 0.2059 | 6  | 3  | [30,76]   |
| chr2:232285992  | PTMA    | UTR3        |                                                                                      | + | Atog | 0.1379 | 0.16   | 7  | 4  | [13,29]   |
| chr2:232285994  | PTMA    | UTR3        |                                                                                      | + | CtoA | 0.1    | 0.3333 | 2  | 2  | [10,18]   |
| chr2:232286002  | PTMA    | UTR3        |                                                                                      | + | GtoA | 0.1667 | 0.3636 | 2  | 2  | [11,12]   |
| chr2:232286059  | PTMA    | UTR3        |                                                                                      | + | GtoA | 0.3077 | 0.3333 | 2  | 2  | [13,15]   |
| chr2:232286060  | PTMA    | UTR3        |                                                                                      | + | GtoA | 0.2857 | 0.4167 | 2  | 2  | [12,14]   |
| chr2:232286093  | PTMA    | UTR3        |                                                                                      | + | Atot | 0.1667 | 0.2143 | 2  | 2  | [12,14]   |
| chr2:232286111  | PTMA    | UTR3        |                                                                                      | + | Atot | 0.1    | 0.3    | 6  | 5  | [16,22]   |
| chr2:232286112  | PTMA    | UTR3        |                                                                                      | + | GtoC | 0.1    | 0.1    | 4  | 2  | [10,10]   |
| chr2:232286280  | PTMA    | UTR3        |                                                                                      | + | GtoA | 0.1    | 0.1154 | 6  | 2  | [10,27]   |
| chr2:232286290  | PTMA    | UTR3        |                                                                                      | + | Atoc | 0.1    | 0.2    | 5  | 2  | [10,11]   |
| chr2:232286291  | PTMA    | UTR3        |                                                                                      | + | Atoc | 0.1    | 0.1429 | 2  | 2  | [14,44]   |
| chr12:6750362   | PTMS    | UTR3        |                                                                                      | + | TtoC | 0.1    | 0.15   | 5  | 4  | [10,20]   |
| chr19:55055410  | PTOV1   | UTR3        |                                                                                      | + | GtoC | 0.3333 | 0.6    | 2  | 2  | [10,18]   |
| chr19:55055681  | PTOV1   | UTR3        |                                                                                      | + | Atot | 0.1111 | 0.3125 | 12 | 12 | [10,31]   |
| chr19:55055792  | PTOV1   | UTR3        |                                                                                      | + | TtoA | 0.1    | 0.1875 | 4  | 3  | [10,27]   |
| chr15:63636158  | PTPLAD1 | coding_exon | ENST00000261875:VtoE;                                                                | + | TtoA | 0.1053 | 0.125  | 5  | 2  | [16,19]   |
| chr15:63656451  | PTPLAD1 | UTR3        |                                                                                      | + | Atog | 0.1    | 0.2143 | 2  | 2  | [10,14]   |
| chr15:63657271  | PTPLAD1 | UTR3        |                                                                                      | + | Atog | 0.1    | 0.1538 | 4  | 2  | [10,13]   |
| chr3:124695945  | PTPLB   | UTR3        |                                                                                      | - | Atog | 0.1    | 0.2    | 3  | 2  | [10,10]   |
| chr11:47549931  | PTPMT1  | UTR3        |                                                                                      | + | TtoC | 0.125  | 0.1667 | 4  | 3  | [12,16]   |
| chr20:48634595  | PTPN1   | UTR3        |                                                                                      | + | GtoC | 0.1    | 0.1    | 2  | 2  | [10,10]   |
| chr7:77094405   | PTPN12  | coding_exon |                                                                                      | + | CtoT | 0.1    | 0.125  | 2  | 2  | [10,16]   |
| chr7:77038379   | PTPN12  | mixed       |                                                                                      | + | Atoc | 0.1    | 0.1818 | 3  | 2  | [11,20]   |
| chr2:130847659  | PTPN18  | mixed       |                                                                                      | + | Atog | 0.1    | 0.1053 | 2  | 2  | [10,19]   |
| chr3:47429377   | PTPN23  | coding_exon | ENST00000265562:StoP;                                                                | + | TtoC | 0.1    | 0.1    | 2  | 2  | [10,10]   |
| chr12:6940728   | PTPN6   | UTR3        |                                                                                      | + | TtoC | 0.1    | 0.1875 | 11 | 5  | [16,90]   |
| chr12:6940737   | PTPN6   | UTR3        |                                                                                      | + | TtoA | 0.1429 | 0.1429 | 7  | 2  | [14,15]   |
| chr15:73547227  | PTPN9   | UTR3        |                                                                                      | - | Atog | 0.1    | 0.1429 | 3  | 2  | [10,14]   |

|                 |           |             |                                                                                                                                                                                                                    |  |   |      |        |        |    |    |          |
|-----------------|-----------|-------------|--------------------------------------------------------------------------------------------------------------------------------------------------------------------------------------------------------------------|--|---|------|--------|--------|----|----|----------|
| chr20:2967286   | PTPRA     | UTR3        |                                                                                                                                                                                                                    |  | + | TtoA | 0.1    | 0.1    | 5  | 2  | [10,10]  |
| chr1:196970974  | PTPRC     | coding_exon | ENST00000271610:DtoE;ENST00000348564:DtoE;ENST00000352140:DtoE;ENST00000352433:YtoD;ENST00000393964:YtoD;                                                                                                          |  | + | TtoA | 0.1    | 0.1111 | 8  | 2  | [10,27]  |
| chr19:5224570   | PTPRS     | coding_exon | ENST00000262963:GtoR;ENST00000348075:GtoR;ENST00000353284:GtoR;ENST00000352433:YtoD;ENST00000393964:YtoD;                                                                                                          |  | - | GtoA | 0.1    | 0.1538 | 2  | 2  | [10,13]  |
| chr5:159783876  | PTTG1     | coding_exon | ENST00000352433:YtoD;ENST00000393964:YtoD;                                                                                                                                                                         |  | + | TtoG | 0.1    | 0.1176 | 7  | 2  | [17,20]  |
| chr5:159787425  | PTTG1     | coding_exon | ENST00000352433:YtoD;ENST00000393964:YtoD;                                                                                                                                                                         |  | + | CtoT | 0.1053 | 0.1538 | 6  | 2  | [13,19]  |
| chr5:159782437  | PTTG1     | coding_exon | ENST00000352433:GtoR;ENST00000393964:GtoR;                                                                                                                                                                         |  | + | GtoA | 0.1    | 0.1667 | 2  | 2  | [12,20]  |
| chr1:31177027   | PUM1      | UTR3        |                                                                                                                                                                                                                    |  | - | TtoC | 0.1    | 0.2174 | 10 | 7  | [13,30]  |
| chr2:20374865   | PUM2      | coding_exon | ENST00000319801:DtoA;ENST00000338086:DtoA;ENST00000361078:DtoA;ENST00000361078:DtoA;                                                                                                                               |  | - | AtoC | 0.1    | 0.2    | 2  | 2  | [10,10]  |
| chr2:20312081   | PUM2      | UTR3        |                                                                                                                                                                                                                    |  | - | TtoC | 0.2222 | 0.25   | 8  | 2  | [12,18]  |
| chr2:20312206   | PUM2      | UTR3        |                                                                                                                                                                                                                    |  | - | AtoG | 0.1176 | 0.1538 | 5  | 2  | [13,17]  |
| chr2:20313596   | PUM2      | UTR3        |                                                                                                                                                                                                                    |  | - | AtoG | 0.1333 | 0.3077 | 3  | 2  | [13,15]  |
| chr2:20313870   | PUM2      | UTR3        |                                                                                                                                                                                                                    |  | - | AtoG | 0.1111 | 0.1429 | 2  | 2  | [14,18]  |
| chr2:20313872   | PUM2      | UTR3        |                                                                                                                                                                                                                    |  | - | TtoC | 0.1    | 0.1562 | 7  | 2  | [10,32]  |
| chr7:44890578   | PURB      | mixed       |                                                                                                                                                                                                                    |  | - | GtoA | 0.1    | 0.1667 | 5  | 3  | [10,19]  |
| chr7:104885495  | PUS7      | coding_exon | ENST00000356362:LtoQ;ENST00000469408:LtoQ;                                                                                                                                                                         |  | - | TtoA | 0.1    | 0.1667 | 2  | 2  | [10,12]  |
| chr11:119051119 | PVRL1     | coding_exon |                                                                                                                                                                                                                    |  | - | CtoG | 0.1    | 0.1    | 3  | 2  | [10,10]  |
| chr12:106630322 | PWP1      | UTR3        |                                                                                                                                                                                                                    |  | + | GtoA | 0.1    | 0.1333 | 5  | 2  | [10,15]  |
| chr8:78074783   | PXMP3     | mixed       |                                                                                                                                                                                                                    |  | - | AtoG | 0.1    | 0.3529 | 9  | 7  | [10,24]  |
| chr12:119136029 | PXN       | coding_exon | ENST00000228307:RtoQ;ENST00000267257:RtoQ;ENST00000331257:RtoQ;ENST00000228307:FtoV;ENST00000267257:FtoV;ENST00000397506:FtoV;ENST00000228307:FtoL;ENST00000267257:FtoL;ENST00000331257:FtoL;ENST00000397506:FtoL; |  | - | GtoA | 0.1    | 0.1429 | 6  | 3  | [10,18]  |
| chr12:119134559 | PXN       | coding_exon | ENST00000228307:FtoV;ENST00000267257:FtoV;ENST00000397506:FtoV;ENST00000228307:FtoL;ENST00000267257:FtoL;ENST00000331257:FtoL;ENST00000397506:FtoL;                                                                |  | - | TtoG | 0.1333 | 0.1667 | 4  | 3  | [12,15]  |
| chr12:119136337 | PXN       | coding_exon | ENST00000228307:FtoL;ENST00000267257:FtoL;ENST00000331257:FtoL;ENST00000397506:FtoL;                                                                                                                               |  | - | TtoC | 0.1    | 0.2222 | 2  | 2  | [10,10]  |
| chr12:119134560 | PXN       | coding_exon | ENST00000228307:FtoL;ENST00000267257:FtoL;ENST00000331257:FtoL;ENST00000397506:FtoL;                                                                                                                               |  | - | CtoA | 0.125  | 0.2308 | 5  | 3  | [13,16]  |
| chr1:1531200125 | PYGO2     | mixed       |                                                                                                                                                                                                                    |  | - | TtoC | 0.1333 | 0.1429 | 5  | 2  | [15,15]  |
| chr1:153196741  | PYGO2     | UTR3        |                                                                                                                                                                                                                    |  | - | TtoC | 0.1    | 0.1    | 3  | 2  | [10,10]  |
| chr1:153196770  | PYGO2     | UTR3        |                                                                                                                                                                                                                    |  | - | TtoG | 0.1    | 0.1053 | 4  | 2  | [10,19]  |
| chr12:21493767  | PYROXD1   | coding_exon | ENST00000240651:ltoV;                                                                                                                                                                                              |  | + | AtoG | 0.1    | 0.125  | 2  | 2  | [10,16]  |
| chr3:49117170   | QARS      | coding_exon | ENST00000306125:MtoL;ENST00000414533:MtoL;ENST00000420147:MtoL;ENST00000306125:MtoL;                                                                                                                               |  | - | AtoC | 0.1    | 0.1    | 2  | 2  | [10,10]  |
| chr3:49108382   | QARS      | UTR3        |                                                                                                                                                                                                                    |  | - | TtoG | 0.1364 | 0.1667 | 13 | 2  | [20,22]  |
| chr4:17103060   | QDPR      | coding_exon |                                                                                                                                                                                                                    |  | - | TtoG | 0.1    | 0.1053 | 3  | 2  | [10,19]  |
| chr4:17097609   | QDPR      | UTR3        |                                                                                                                                                                                                                    |  | - | AtoG | 0.1538 | 0.3077 | 4  | 2  | [13,13]  |
| chr16:29586633  | QPRT      | mixed       |                                                                                                                                                                                                                    |  | + | AtoG | 0.1176 | 0.1429 | 4  | 2  | [14,18]  |
| chr16:29586637  | QPRT      | mixed       |                                                                                                                                                                                                                    |  | + | AtoG | 0.1053 | 0.1875 | 7  | 2  | [16,19]  |
| chr16:29586863  | QPRT      | mixed       |                                                                                                                                                                                                                    |  | + | AtoG | 0.1053 | 0.1799 | 11 | 3  | [35,139] |
| chr16:29586933  | QPRT      | mixed       |                                                                                                                                                                                                                    |  | + | AtoG | 0.1077 | 0.1333 | 8  | 2  | [15,65]  |
| chr16:29587006  | QPRT      | mixed       |                                                                                                                                                                                                                    |  | + | AtoG | 0.1    | 0.1765 | 4  | 2  | [10,17]  |
| chr16:29587023  | QPRT      | mixed       |                                                                                                                                                                                                                    |  | + | AtoG | 0.1053 | 0.1364 | 6  | 2  | [19,22]  |
| chr16:29588717  | QPRT      | mixed       |                                                                                                                                                                                                                    |  | + | AtoG | 0.1739 | 0.359  | 16 | 16 | [36,130] |
| chr3:49045206   | QRICH1    | coding_exon | ENST00000357496:FtoV;ENST00000395443:FtoV;ENST00000424300:FtoV;                                                                                                                                                    |  | - | TtoG | 0.1538 | 0.1875 | 6  | 2  | [13,16]  |
| chr6:107210183  | QRSL1     | coding_exon | ENST00000369046:GtoA;                                                                                                                                                                                              |  | + | GtoC | 0.1    | 0.1111 | 2  | 2  | [18,20]  |
| chr6:107220594  | QRSL1     | UTR3        |                                                                                                                                                                                                                    |  | + | CtoA | 0.1    | 0.1429 | 4  | 3  | [10,14]  |
| chr9:138239670  | QSOX2     | UTR3        |                                                                                                                                                                                                                    |  | - | AtoC | 0.1    | 0.1111 | 2  | 2  | [10,18]  |
| chr12:55975509  | R3HDM2    | mixed       |                                                                                                                                                                                                                    |  | - | AtoT | 0.1    | 0.1    | 2  | 2  | [10,10]  |
| chr12:55975511  | R3HDM2    | mixed       |                                                                                                                                                                                                                    |  | - | GtoT | 0.1    | 0.1    | 2  | 2  | [10,10]  |
| chr8:37851838   | RAB11FIP1 | coding_exon | ENST00000287263:Yto*;ENST00000330843:Yto*;ENST00000343853:Yto*;                                                                                                                                                    |  | - | CtoA | 0.125  | 0.1333 | 2  | 2  | [15,16]  |
| chr8:37854031   | RAB11FIP1 | coding_exon | ENST00000287263:StoP;ENST00000330843:StoP;ENST00000343853:StoP;                                                                                                                                                    |  | - | TtoC | 0.1    | 0.1176 | 3  | 2  | [10,17]  |
| chr8:37836348   | RAB11FIP1 | UTR3        |                                                                                                                                                                                                                    |  | - | AtoG | 0.1053 | 0.1667 | 3  | 2  | [12,19]  |
| chr8:37837674   | RAB11FIP1 | UTR3        |                                                                                                                                                                                                                    |  | - | TtoC | 0.1    | 0.1    | 4  | 2  | [10,10]  |
| chr8:37838228   | RAB11FIP1 | UTR3        |                                                                                                                                                                                                                    |  | - | GtoA | 0.1    | 0.1    | 2  | 2  | [10,10]  |
| chr1:152225281  | RAB13     | coding_exon | ENST00000368575:VtoA;                                                                                                                                                                                              |  | - | TtoC | 0.1    | 0.125  | 3  | 2  | [10,16]  |
| chr1:152221676  | RAB13     | coding_exon | ENST00000368575:FtoL;                                                                                                                                                                                              |  | - | TtoC | 0.1333 | 0.2308 | 4  | 3  | [13,16]  |
| chr10:27861495  | RAB18     | coding_exon |                                                                                                                                                                                                                    |  | + | TtoC | 0.1071 | 0.1111 | 4  | 2  | [18,28]  |
| chr10:27867031  | RAB18     | UTR3        |                                                                                                                                                                                                                    |  | + | AtoG | 0.1    | 0.1071 | 3  | 3  | [10,28]  |
| chr2:65178665   | RAB1A     | coding_exon | ENST00000260638:VtoM;ENST00000398529:VtoM;ENST00000409784:VtoM;                                                                                                                                                    |  | - | GtoA | 0.1786 | 0.2    | 3  | 2  | [10,28]  |
| chr13:109973868 | RAB20     | UTR3        |                                                                                                                                                                                                                    |  | - | TtoC | 0.1333 | 0.1579 | 2  | 2  | [15,19]  |
| chr12:70466578  | RAB21     | UTR3        |                                                                                                                                                                                                                    |  | + | TtoA | 0.1333 | 0.1818 | 3  | 2  | [11,15]  |
| chr20:56369014  | RAB22A    | UTR3        |                                                                                                                                                                                                                    |  | + | AtoG | 0.1    | 0.125  | 3  | 2  | [10,16]  |
| chr15:53308160  | RAB27A    | coding_exon |                                                                                                                                                                                                                    |  | - | TtoC | 0.1111 | 0.1176 | 4  | 2  | [10,17]  |
| chr15:53284850  | RAB27A    | UTR3        |                                                                                                                                                                                                                    |  | - | TtoC | 0.1    | 0.1429 | 4  | 2  | [10,14]  |
| chr4:12992236   | RAB28     | coding_exon | ENST00000288723:VtoL;ENST00000330852:VtoL;ENST00000338176:VtoL;                                                                                                                                                    |  | - | GtoC | 0.1    | 0.1    | 2  | 2  | [10,10]  |
| chr8:61696010   | RAB2A     | UTR3        |                                                                                                                                                                                                                    |  | + | AtoG | 0.1429 | 0.2727 | 5  | 5  | [11,14]  |
| chr14:20998085  | RAB2B     | UTR3        |                                                                                                                                                                                                                    |  | - | AtoG | 0.1    | 0.1    | 3  | 2  | [10,10]  |
| chr18:9850719   | RAB31     | UTR3        |                                                                                                                                                                                                                    |  | + | AtoG | 0.1    | 0.1111 | 4  | 3  | [10,27]  |
| chr12:119026056 | RAB35     | coding_exon | ENST00000229340:WtoG;ENST00000427416:WtoG;                                                                                                                                                                         |  | - | TtoG | 0.1111 | 0.125  | 3  | 2  | [16,18]  |
| chr12:119018843 | RAB35     | UTR3        |                                                                                                                                                                                                                    |  | - | AtoC | 0.1    | 0.2    | 3  | 3  | [10,30]  |
| chr11:87486157  | RAB38     | UTR3        |                                                                                                                                                                                                                    |  | - | TtoC | 0.1    | 0.1176 | 2  | 2  | [10,17]  |
| chr2:135594882  | RAB3GAP1  | coding_exon |                                                                                                                                                                                                                    |  | + | TtoC | 0.1    | 0.1    | 5  | 2  | [10,10]  |
| chr2:135624417  | RAB3GAP1  | coding_exon |                                                                                                                                                                                                                    |  | + | AtoG | 0.1053 | 0.125  | 2  | 2  | [19,24]  |
| chr2:135643753  | RAB3GAP1  | mixed       |                                                                                                                                                                                                                    |  | + | TtoA | 0.1053 | 0.125  | 2  | 2  | [16,19]  |
| chr1:218450777  | RAB3GAP2  | coding_exon | ENST00000358951:FtoL;                                                                                                                                                                                              |  | - | TtoC | 0.1    | 0.1    | 5  | 2  | [10,10]  |
| chr1:218393960  | RAB3GAP2  | coding_exon |                                                                                                                                                                                                                    |  | - | TtoC | 0.1429 | 0.1538 | 2  | 2  | [13,14]  |
| chr1:218389014  | RAB3GAP2  | UTR3        |                                                                                                                                                                                                                    |  | - | TtoC | 0.1111 | 0.1538 | 4  | 2  | [13,18]  |
| chr1:218389369  | RAB3GAP2  | UTR3        |                                                                                                                                                                                                                    |  | - | AtoG | 0.1    | 0.1667 | 5  | 3  | [10,14]  |
| chr1:218389852  | RAB3GAP2  | UTR3        |                                                                                                                                                                                                                    |  | - | AtoT | 0.1    | 0.125  | 3  | 2  | [10,16]  |
| chr16:619125    | RAB40C    | UTR3        |                                                                                                                                                                                                                    |  | + | TtoA | 0.1    | 0.2    | 2  | 2  | [10,10]  |
| chr1:227506500  | RAB4A     | UTR3        |                                                                                                                                                                                                                    |  | + | GtoA | 0.1    | 0.1    | 2  | 2  | [10,10]  |
| chr3:19994854   | RAB5A     | coding_exon | ENST00000273047:StoP;ENST00000422422:StoP;                                                                                                                                                                         |  | + | TtoC | 0.1    | 0.1    | 3  | 2  | [10,10]  |
| chr3:19967313   | RAB5A     | UTR5        |                                                                                                                                                                                                                    |  | + | TtoC | 0.1    | 0.1176 | 2  | 2  | [10,17]  |
| chr17:37530531  | RAB5C     | UTR3        |                                                                                                                                                                                                                    |  | - | TtoC | 0.1    | 0.1    | 3  | 2  | [10,10]  |
| chr3:130015545  | RAB7A     | UTR3        |                                                                                                                                                                                                                    |  | + | AtoG | 0.1538 | 0.1818 | 4  | 2  | [11,13]  |
| chr17:5205371   | RABEP1    | coding_exon | ENST00000262477:StoP;ENST00000341923:StoP;ENST00000408982:StoP;                                                                                                                                                    |  | + | TtoC | 0.1    | 0.1667 | 4  | 2  | [18,20]  |
| chr17:5205320   | RABEP1    | coding_exon | ENST00000262477:MtoV;ENST00000341923:MtoV;ENST00000408982:MtoV;                                                                                                                                                    |  | + | AtoG | 0.1    | 0.1111 | 2  | 2  | [10,18]  |
| chr17:5182108   | RABEP1    | coding_exon | ENST00000262477:DtoG;ENST00000341923:DtoG;ENST00000408982:DtoG;                                                                                                                                                    |  | + | AtoG | 0.1    | 0.1053 | 3  | 2  | [10,19]  |
| chr17:5228442   | RABEP1    | UTR3        |                                                                                                                                                                                                                    |  | + | GtoA | 0.1    | 0.1    | 2  | 2  | [10,10]  |
| chr17:5229475   | RABEP1    | UTR3        |                                                                                                                                                                                                                    |  | + | TtoG | 0.1    | 0.2    | 6  | 2  | [10,11]  |
| chr9:124906839  | RABGAP1   | UTR3        |                                                                                                                                                                                                                    |  | + | AtoG | 0.1    | 0.2    | 7  | 2  | [10,10]  |
| chr1:173113155  | RABGAP1L  | mixed       |                                                                                                                                                                                                                    |  | + | GtoA | 0.1    | 0.2    | 2  | 2  | [10,10]  |
| chr1:173224474  | RABGAP1L  | mixed       |                                                                                                                                                                                                                    |  | + | GtoT | 0.1    | 0.1    | 2  | 2  | [10,10]  |
| chr7:65911616   | RABGEF1   | coding_exon |                                                                                                                                                                                                                    |  | + | TtoC | 0.1053 | 0.1538 | 5  | 2  | [13,19]  |
| chr7:65913423   | RABGEF1   | UTR3        |                                                                                                                                                                                                                    |  | + | TtoA | 0.1    | 0.1111 | 2  | 2  | [10,10]  |
| chr7:65913447   | RABGEF1   | UTR3        |                                                                                                                                                                                                                    |  | + | TtoC | 0.1    | 0.1429 | 2  | 2  | [14,20]  |
| chr7:65913531   | RABGEF1   | UTR3        |                                                                                                                                                                                                                    |  | + | TtoC | 0.1    | 0.1176 | 2  | 2  | [10,17]  |
| chr1:76033272   | RABGGB    | mixed       |                                                                                                                                                                                                                    |  | + | AtoT | 0.1    | 0.1    | 2  | 2  | [10,10]  |
| chr22:35492134  | RABL4     | coding_exon | ENST00000340630:DtoE;ENST00000433985:DtoE;ENST00000453009:DtoE;                                                                                                                                                    |  | - | TtoA | 0.1    | 0.1053 | 4  | 2  | [10,19]  |
| chr7:100745054  | RABL5     | UTR3        |                                                                                                                                                                                                                    |  | - | TtoG | 0.1    | 0.1    | 2  | 2  | [10,10]  |
| chr7:100745057  | RABL5     | UTR3        |                                                                                                                                                                                                                    |  | - | TtoG | 0.1    | 0.1429 | 2  | 2  | [11,14]  |
| chr7:6408652    | RAC1      | UTR3        |                                                                                                                                                                                                                    |  | + | TtoG | 0.1034 | 0.1515 | 6  | 3  | [30,43]  |



|                 |          |             |                                                                                   |   |      |        |        |    |    |         |
|-----------------|----------|-------------|-----------------------------------------------------------------------------------|---|------|--------|--------|----|----|---------|
| chr3:8898033    | RAD18    | UTR3        |                                                                                   | - | TtoG | 0.1    | 0.1538 | 6  | 3  | [10,13] |
| chr19:12924913  | RAD23A   | UTR3        |                                                                                   | + | AtoG | 0.1    | 0.25   | 2  | 2  | [10,17] |
| chr19:12925440  | RAD23A   | UTR3        |                                                                                   | + | TtoA | 0.1111 | 0.1538 | 4  | 3  | [10,14] |
| chr9:109132970  | RAD23B   | mixed       |                                                                                   | + | AtoG | 0.1    | 0.1538 | 3  | 2  | [10,13] |
| chr5:131979610  | RAD50    | coding_exon | ENST00000265335:LtoR;ENST00000378810:LtoR;ENST00000378823:LtoR;                   | + | TtoG | 0.1    | 0.1    | 9  | 2  | [10,10] |
| chr15:38810942  | RAD51    | UTR3        |                                                                                   | + | TtoC | 0.125  | 0.1429 | 4  | 2  | [15,16] |
| chr17:54129107  | RAD51C   | coding_exon |                                                                                   | + | TtoG | 0.1333 | 0.1538 | 5  | 3  | [15,29] |
| chr3:51639855   | RAD54L2  | coding_exon |                                                                                   | + | TtoC | 0.1    | 0.1    | 3  | 3  | [10,10] |
| chr11:66917741  | RAD9A    | coding_exon | ENST00000307980:VtoA;                                                             | + | TtoC | 0.1    | 0.1    | 2  | 2  | [10,10] |
| chr11:66920222  | RAD9A    | coding_exon | ENST00000307980:RtoT;                                                             | + | GtoC | 0.1    | 0.1429 | 9  | 2  | [10,14] |
| chr11:66916827  | RAD9A    | coding_exon | ENST00000307980:KtoQ;                                                             | + | AtoC | 0.1429 | 0.2    | 4  | 3  | [10,14] |
| chr20:55386498  | RAE1     | coding_exon | ENST00000371242:QtoR;ENST00000395840:QtoR;ENST00000395841:QtoR;                   | + | AtoG | 0.1    | 0.1429 | 3  | 2  | [10,14] |
| chr3:12600140   | RAF1     | UTR3        |                                                                                   | - | AtoG | 0.15   | 0.25   | 6  | 2  | [12,20] |
| chr3:12680550   | RAF1     | UTR5        |                                                                                   | - | AtoG | 0.1    | 0.1176 | 3  | 2  | [10,17] |
| chr3:12680552   | RAF1     | UTR5        |                                                                                   | - | GtoA | 0.1176 | 0.15   | 3  | 2  | [17,20] |
| chr1:153377556  | RAG1AP1  | UTR3        |                                                                                   | + | TtoG | 0.1    | 0.2    | 2  | 2  | [10,10] |
| chr17:17638680  | RAI1     | coding_exon | ENST00000261641:StoP;ENST00000315321:StoP;ENST00000353383:StoP;ENST0000039696651  | + | TtoC | 0.1    | 0.1333 | 2  | 2  | [10,15] |
| chr7:39696651   | RALA     | coding_exon | ENST00000005257:EtoG;                                                             | + | AtoG | 0.1    | 0.1111 | 2  | 2  | [18,20] |
| chr7:39702910   | RALA     | coding_exon | ENST00000005257:AtoE;                                                             | + | CtoA | 0.1111 | 0.1538 | 6  | 4  | [13,24] |
| chr7:39629729   | RALA     | UTR5        |                                                                                   | + | TtoG | 0.1    | 0.1    | 2  | 2  | [10,10] |
| chr2:120768437  | RALB     | UTR3        |                                                                                   | + | AtoG | 0.1    | 0.3    | 2  | 2  | [10,10] |
| chr9:134963066  | RALGDS   | UTR3        |                                                                                   | - | TtoG | 0.1    | 0.1    | 2  | 2  | [10,11] |
| chr20:32131723  | RALY     | UTR3        |                                                                                   | + | TtoC | 0.125  | 0.1538 | 12 | 3  | [13,20] |
| chr20:32131727  | RALY     | UTR3        |                                                                                   | + | AtoG | 0.1667 | 0.4    | 4  | 3  | [10,12] |
| chr12:129926754 | RAN      | UTR3        |                                                                                   | + | AtoG | 0.1034 | 0.12   | 10 | 2  | [26,30] |
| chr12:129926756 | RAN      | UTR3        |                                                                                   | + | TtoA | 0.1176 | 0.4286 | 18 | 16 | [11,38] |
| chr12:129927543 | RAN      | UTR3        |                                                                                   | + | TtoC | 0.1    | 0.1875 | 3  | 2  | [10,16] |
| chr16:66319848  | RANBP10  | coding_exon | ENST00000317506:IttoV;ENST00000411657:IttoV;ENST00000448631:IttoV;                | - | AtoG | 0.1    | 0.1111 | 2  | 2  | [10,18] |
| chr2:108765620  | RANBP2   | coding_exon | ENST00000283195:IttoG;ENST00000409491:IttoG;                                      | + | TtoA | 0.1    | 0.1    | 4  | 2  | [10,30] |
| chr2:108764254  | RANBP2   | coding_exon |                                                                                   | + | TtoC | 0.1    | 0.1304 | 3  | 2  | [10,23] |
| chr19:5868097   | RANBP3   | UTR3        |                                                                                   | - | TtoA | 0.1    | 0.1818 | 2  | 2  | [10,11] |
| chr6:13747834   | RANBP9   | coding_exon | ENST00000011619:StoG;ENST00000283152:StoG;                                        | - | AtoG | 0.1429 | 0.16   | 4  | 2  | [14,25] |
| chr6:13765375   | RANBP9   | coding_exon | ENST00000011619:CtoW;ENST00000283152:CtoW;                                        | - | TtoG | 0.1    | 0.1538 | 4  | 2  | [10,13] |
| chr22:39982752  | RANGAP1  | coding_exon | ENST00000356244:VtoG;ENST00000405383:VtoG;ENST00000405486:VtoG;ENST0000039971567  | - | TtoG | 0.1    | 0.1905 | 6  | 3  | [15,21] |
| chr22:39971567  | RANGAP1  | UTR3        |                                                                                   | - | AtoG | 0.1    | 0.3077 | 5  | 5  | [10,19] |
| chr1:112056999  | RAP1A    | UTR3        |                                                                                   | + | AtoG | 0.1053 | 0.25   | 3  | 2  | [12,19] |
| chr1:112057002  | RAP1A    | UTR3        |                                                                                   | + | TtoA | 0.1333 | 0.1905 | 5  | 2  | [15,22] |
| chr12:67340559  | RAP1B    | UTR3        |                                                                                   | + | TtoG | 0.1111 | 0.2    | 5  | 3  | [10,18] |
| chr4:99556999   | RAP1GDS1 | coding_exon | ENST00000264572:KtoE;ENST00000339360:KtoE;ENST00000380158:KtoE;ENST00000460498849 | + | AtoG | 0.1    | 0.3    | 2  | 2  | [10,10] |
| chr4:160498849  | RAPGEF2  | UTR3        |                                                                                   | + | TtoG | 0.1    | 0.1    | 2  | 2  | [10,10] |
| chr11:63060920  | RARRES3  | coding_exon | ENST00000255688:AtoS;ENST00000439013:AtoS;                                        | + | GtoT | 0.1    | 0.1    | 3  | 2  | [10,10] |
| chr6:88296081   | RARS2    | coding_exon | ENST00000369536:LtoP;                                                             | - | TtoC | 0.1    | 0.1667 | 2  | 2  | [10,12] |
| chr5:86705874   | RASA1    | coding_exon | ENST00000274376:StoP;ENST00000456692:StoP;                                        | + | TtoC | 0.1538 | 0.1818 | 3  | 2  | [11,13] |
| chr5:86706472   | RASA1    | coding_exon | ENST00000274376:StoI;ENST00000456692:StoI;                                        | + | GtoT | 0.1    | 0.2    | 2  | 2  | [10,10] |
| chr5:86722551   | RASA1    | UTR3        |                                                                                   | + | AtoT | 0.1    | 0.1    | 3  | 2  | [10,10] |
| chr5:86722622   | RASA1    | UTR3        |                                                                                   | + | GtoT | 0.1    | 0.1    | 2  | 2  | [10,10] |
| chr19:15423456  | RASAL3   | UTR3        |                                                                                   | - | TtoA | 0.1053 | 0.1818 | 3  | 2  | [11,19] |
| chr19:15423458  | RASAL3   | UTR3        |                                                                                   | - | AtoG | 0.1429 | 0.1923 | 6  | 3  | [22,28] |
| chr15:36591168  | RASGRP1  | coding_exon | ENST00000310803:GtoC;ENST00000414708:GtoC;ENST00000415523:GtoC;ENST0000036578360  | - | GtoT | 0.1    | 0.125  | 4  | 2  | [10,17] |
| chr15:36578360  | RASGRP1  | mixed       |                                                                                   | - | TtoC | 0.1    | 0.125  | 3  | 2  | [10,16] |
| chr3:50342730   | RASSF1   | UTR3        |                                                                                   | - | TtoC | 0.1071 | 0.1176 | 4  | 2  | [17,28] |
| chr20:4710057   | RASSF2   | UTR3        |                                                                                   | - | AtoG | 0.1    | 0.125  | 2  | 2  | [10,16] |
| chr20:4710395   | RASSF2   | UTR3        |                                                                                   | - | GtoT | 0.1176 | 0.1176 | 5  | 2  | [17,18] |
| chr12:63375251  | RASSF3   | UTR3        |                                                                                   | + | TtoC | 0.1333 | 0.2    | 3  | 2  | [10,15] |
| chr19:10288728  | RAVER1   | UTR3        |                                                                                   | - | AtoT | 0.1    | 0.3077 | 4  | 2  | [13,20] |
| chr19:10289099  | RAVER1   | UTR3        |                                                                                   | - | TtoA | 0.1333 | 0.1333 | 6  | 2  | [16,16] |
| chr13:47952304  | RB1      | UTR3        |                                                                                   | + | AtoG | 0.1    | 0.125  | 4  | 2  | [10,16] |
| chr13:47952378  | RB1      | UTR3        |                                                                                   | + | TtoG | 0.1    | 0.125  | 4  | 2  | [10,16] |
| chr1:32907434   | RBBP4    | coding_exon |                                                                                   | + | AtoG | 0.1    | 0.1429 | 4  | 2  | [10,21] |
| chr1:203322683  | RBBP5    | UTR3        |                                                                                   | - | TtoC | 0.1    | 0.1429 | 3  | 2  | [10,14] |
| chr1:203322790  | RBBP5    | UTR3        |                                                                                   | - | TtoG | 0.1    | 0.1    | 4  | 2  | [10,10] |
| chr1:203322821  | RBBP5    | UTR3        |                                                                                   | - | TtoC | 0.1111 | 0.2    | 3  | 2  | [10,10] |
| chr16:24488024  | RBBP6    | coding_exon | ENST00000319715:YtoH;ENST00000348022:YtoH;                                        | + | TtoC | 0.1333 | 0.1333 | 2  | 2  | [15,15] |
| chr16:24488778  | RBBP6    | coding_exon | ENST00000319715:RtoK;ENST00000348022:RtoK;                                        | + | GtoA | 0.1    | 0.1818 | 2  | 2  | [10,11] |
| chr16:24478381  | RBBP6    | coding_exon |                                                                                   | + | AtoG | 0.1    | 0.1    | 2  | 2  | [10,10] |
| chr20:18425732  | RBBP9    | coding_exon | ENST00000337227:VtoG;ENST00000339848:VtoG;                                        | + | TtoG | 0.1    | 0.1053 | 3  | 2  | [10,19] |
| chr20:346449    | RBCK1    | mixed       |                                                                                   | + | AtoG | 0.1    | 0.1    | 2  | 2  | [10,20] |
| chr20:359603    | RBCK1    | UTR3        |                                                                                   | + | TtoC | 0.1    | 0.25   | 6  | 3  | [12,30] |
| chr20:35059082  | RBL1     | UTR3        |                                                                                   | - | TtoC | 0.1    | 0.1    | 3  | 2  | [10,10] |
| chr16:52053190  | RBL2     | coding_exon | ENST00000262133:NtoK;ENST00000379935:NtoK;                                        | + | CtoG | 0.1    | 0.1    | 2  | 2  | [10,10] |
| chr16:52082170  | RBL2     | UTR3        |                                                                                   | + | GtoA | 0.1053 | 0.1429 | 5  | 2  | [19,21] |
| chr16:52082171  | RBL2     | UTR3        |                                                                                   | + | AtoT | 0.1    | 0.2632 | 5  | 3  | [10,20] |
| chr8:94816068   | RBM12B   | coding_exon | ENST00000329529:RtoW;                                                             | - | AtoT | 0.1    | 0.15   | 4  | 2  | [10,20] |
| chr8:94815132   | RBM12B   | coding_exon | ENST00000329529:KtoE;                                                             | - | AtoG | 0.1    | 0.1    | 3  | 3  | [10,10] |
| chr8:94816007   | RBM12B   | coding_exon | ENST00000329529:FtoS;                                                             | - | TtoC | 0.1    | 0.1    | 2  | 2  | [10,10] |
| chr11:66149277  | RBM14    | coding_exon | ENST00000310137:QtoK;                                                             | + | CtoA | 0.1667 | 0.1923 | 3  | 2  | [12,26] |
| chr1:110689719  | RBM15    | coding_exon | ENST00000369784:Kto*;                                                             | + | AtoT | 0.1    | 0.1    | 2  | 2  | [10,10] |
| chr6:155187140  | RBM16    | coding_exon |                                                                                   | + | AtoC | 0.1    | 0.2308 | 2  | 2  | [10,14] |
| chr10:6187062   | RBM17    | coding_exon | ENST00000379888:EtoK;ENST00000418869:EtoK;ENST00000446108:EtoK;                   | + | GtoA | 0.1034 | 0.1404 | 10 | 2  | [57,58] |
| chr10:6197666   | RBM17    | UTR3        |                                                                                   | + | TtoC | 0.1    | 0.1667 | 5  | 3  | [10,20] |
| chr14:22444164  | RBM23    | coding_exon |                                                                                   | - | TtoG | 0.1053 | 0.1111 | 3  | 2  | [18,19] |
| chr14:22440217  | RBM23    | UTR3        |                                                                                   | - | CtoG | 0.1071 | 0.3529 | 11 | 5  | [17,56] |
| chr14:22440250  | RBM23    | UTR3        |                                                                                   | - | GtoT | 0.1042 | 0.3077 | 16 | 11 | [13,58] |
| chr14:22458065  | RBM23    | UTR5        |                                                                                   | - | TtoG | 0.1    | 0.1    | 2  | 2  | [10,10] |
| chr14:72656997  | RBM25    | UTR3        |                                                                                   | + | TtoC | 0.1053 | 0.1053 | 7  | 2  | [19,20] |
| chr14:72657303  | RBM25    | UTR3        |                                                                                   | + | TtoC | 0.1111 | 0.1818 | 7  | 2  | [10,11] |
| chr13:78794485  | RBM26    | mixed       |                                                                                   | - | AtoG | 0.1    | 0.1429 | 7  | 3  | [10,21] |
| chr13:78794487  | RBM26    | mixed       |                                                                                   | - | GtoC | 0.1111 | 0.1818 | 6  | 2  | [11,18] |
| chr13:78792150  | RBM26    | UTR3        |                                                                                   | - | TtoC | 0.1    | 0.1    | 3  | 2  | [10,10] |
| chr5:145621406  | RBM27    | coding_exon | ENST00000265271:QtoH;                                                             | + | AtoC | 0.1    | 0.125  | 3  | 2  | [10,16] |
| chr5:145630787  | RBM27    | coding_exon |                                                                                   | + | GtoA | 0.1111 | 0.1333 | 3  | 2  | [15,18] |
| chr7:127740534  | RBM28    | coding_exon | ENST00000223073:VtoA;ENST00000415472:VtoA;                                        | - | TtoC | 0.1111 | 0.2    | 5  | 2  | [10,18] |
| chr7:155230562  | RBM33    | coding_exon |                                                                                   | + | GtoA | 0.1304 | 0.1667 | 3  | 2  | [12,23] |
| chr1:233382672  | RBM34    | coding_exon | ENST00000366606:QtoR;ENST00000408888:QtoR;                                        | - | AtoG | 0.1053 | 0.1429 | 8  | 2  | [14,19] |
| chr20:33790881  | RBM39    | coding_exon |                                                                                   | - | CtoT | 0.1667 | 0.3    | 4  | 3  | [10,12] |
| chr20:33790882  | RBM39    | coding_exon |                                                                                   | - | GtoA | 0.1667 | 0.3    | 4  | 3  | [10,12] |

|                 |         |             |                                                                        |   |      |        |        |    |    |          |
|-----------------|---------|-------------|------------------------------------------------------------------------|---|------|--------|--------|----|----|----------|
| chr20:33791863  | RBM39   | coding_exon |                                                                        | - | AtoC | 0.1765 | 0.4    | 4  | 3  | [10,17]  |
| chr20:33791902  | RBM39   | coding_exon |                                                                        | - | AtoG | 0.1111 | 0.1429 | 3  | 2  | [14,18]  |
| chr11:66164064  | RBM4    | coding_exon |                                                                        | + | TtoC | 0.1143 | 0.1944 | 8  | 3  | [17,70]  |
| chr11:66170391  | RBM4    | mixed       |                                                                        | + | TtoG | 0.1111 | 0.15   | 8  | 2  | [18,40]  |
| chr4:40121625   | RBM47   | UTR3        |                                                                        | - | AtoG | 0.1    | 0.1    | 3  | 2  | [10,10]  |
| chr3:50102837   | RBM5    | UTR5        |                                                                        | + | CtoT | 0.1    | 0.125  | 3  | 2  | [10,16]  |
| chr3:50073981   | RBM6    | coding_exon |                                                                        | + | CtoG | 0.2    | 0.3333 | 3  | 2  | [10,21]  |
| chr3:50089652   | RBM6    | UTR3        |                                                                        | + | TtoA | 0.1    | 0.1    | 2  | 2  | [10,22]  |
| chr4:26039552   | RBPSUH  | coding_exon | ENST00000342295:LtoH;ENST00000342320:LtoH;ENST00000345843:LtoH;ENST000 | + | TtoA | 0.1    | 0.1053 | 2  | 2  | [10,19]  |
| chr4:26026243   | RBPSUH  | coding_exon |                                                                        | + | GtoA | 0.1    | 0.1579 | 4  | 2  | [10,19]  |
| chr4:25973299   | RBPSUH  | mixed       |                                                                        | + | CtoA | 0.1    | 0.1538 | 2  | 2  | [10,13]  |
| chr4:26045636   | RBPSUH  | UTR3        |                                                                        | + | TtoA | 0.1    | 0.2105 | 2  | 2  | [10,19]  |
| chr9:124646784  | RC3H2   | UTR3        |                                                                        | - | AtoC | 0.1333 | 0.1667 | 2  | 2  | [12,15]  |
| chr13:47962103  | RCBTB2  | UTR3        |                                                                        | - | GtoC | 0.1    | 0.1    | 2  | 2  | [10,30]  |
| chr1:28709382   | RCC1    | UTR5        |                                                                        | + | TtoC | 0.1    | 0.1429 | 3  | 3  | [10,16]  |
| chr15:89305852  | RCCD1   | coding_exon | ENST00000300233:GtoV;ENST00000394258:GtoV;                             | + | GtoT | 0.1    | 0.125  | 2  | 2  | [10,16]  |
| chr4:76626437   | RCHY1   | UTR3        |                                                                        | - | AtoG | 0.1    | 0.1    | 3  | 2  | [10,10]  |
| chr9:4850142    | RCL1    | coding_exon | ENST00000381728:HtoR;ENST00000381730:HtoR;ENST00000381750:HtoR;ENST000 | + | AtoG | 0.1    | 0.1429 | 4  | 2  | [10,14]  |
| chr15:75015106  | RCN2    | coding_exon |                                                                        | + | GtoA | 0.1    | 0.1    | 2  | 2  | [10,10]  |
| chr1:209552871  | RCOR3   | coding_exon | ENST00000367005:EtaA;ENST00000419091:EtaA;ENST00000435653:EtaA;ENST000 | + | AtoC | 0.1    | 0.1    | 2  | 2  | [10,10]  |
| chr1:209544071  | RCOR3   | coding_exon |                                                                        | + | TtoC | 0.1    | 0.1    | 2  | 2  | [10,10]  |
| chr1:209555760  | RCOR3   | UTR3        |                                                                        | + | GtoA | 0.1    | 0.1818 | 2  | 2  | [10,11]  |
| chr1:165940916  | RCSD1   | UTR3        |                                                                        | + | AtoG | 0.125  | 0.5714 | 4  | 3  | [14,24]  |
| chr1:165940918  | RCSD1   | UTR3        |                                                                        | + | TtoC | 0.1    | 0.4286 | 3  | 3  | [14,24]  |
| chr1:165941778  | RCSD1   | UTR3        |                                                                        | + | TtoC | 0.1053 | 0.125  | 11 | 5  | [19,36]  |
| chr14:67213866  | RDH11   | UTR3        |                                                                        | - | TtoC | 0.1    | 0.2632 | 7  | 4  | [13,20]  |
| chr14:67213868  | RDH11   | UTR3        |                                                                        | - | TtoC | 0.1176 | 0.1818 | 10 | 2  | [11,18]  |
| chr11:109609337 | RDX     | coding_exon |                                                                        | - | AtoC | 0.1    | 0.1667 | 4  | 3  | [10,17]  |
| chr14:23719088  | REC8    | coding_exon | ENST00000311457:QtoK;ENST00000447460:QtoK;                             | + | CtoA | 0.1373 | 0.2    | 4  | 2  | [25,51]  |
| chr14:23712384  | REC8    | coding_exon | ENST00000311457:LtoQ;ENST00000447460:LtoQ;                             | + | TtoA | 0.1    | 0.1765 | 2  | 2  | [10,17]  |
| chr14:23718481  | REC8    | coding_exon | ENST00000311457:IttoV;ENST00000447460:IttoV;                           | + | AtoG | 0.1111 | 0.1304 | 4  | 2  | [24,27]  |
| chr14:23716243  | REC8    | coding_exon |                                                                        | + | AtoG | 0.1    | 0.2    | 2  | 2  | [10,10]  |
| chr14:23716255  | REC8    | coding_exon |                                                                        | + | TtoA | 0.3333 | 0.5    | 3  | 3  | [10,16]  |
| chr12:21545477  | RECQL   | UTR5        |                                                                        | - | CtoA | 0.1    | 0.1    | 2  | 2  | [10,10]  |
| chr12:21545510  | RECQL   | UTR5        |                                                                        | - | AtoT | 0.1    | 0.1    | 5  | 2  | [10,10]  |
| chr12:21545662  | RECQL   | UTR5        |                                                                        | - | TtoG | 0.1111 | 0.2308 | 2  | 2  | [10,13]  |
| chr8:145707516  | RECQL4  | UTR3        |                                                                        | - | TtoG | 0.1    | 0.1    | 5  | 2  | [10,10]  |
| chr17:71137150  | RECQL5  | coding_exon | ENST00000317905:LtoV;                                                  | - | CtoG | 0.1667 | 0.25   | 4  | 2  | [12,16]  |
| chr17:71137149  | RECQL5  | coding_exon | ENST00000317905:LtoP;                                                  | - | TtoC | 0.1    | 0.1818 | 2  | 2  | [10,11]  |
| chr10:65040033  | REEP3   | coding_exon |                                                                        | + | AtoG | 0.1    | 0.1    | 2  | 2  | [10,10]  |
| chr11:72785333  | RELT    | UTR3        |                                                                        | + | CtoA | 0.1    | 0.1    | 2  | 2  | [10,10]  |
| chr11:72785334  | RELT    | UTR3        |                                                                        | + | TtoA | 0.1    | 0.2222 | 5  | 3  | [10,10]  |
| chr7:149697696  | REPIN1  | UTR5        |                                                                        | + | AtoC | 0.1    | 0.1818 | 2  | 2  | [10,11]  |
| chr6:139306737  | REPS1   | coding_exon | ENST00000258062:YtoN;ENST00000367663:YtoN;ENST00000367668:YtoN;ENST000 | - | TtoA | 0.1    | 0.1    | 3  | 2  | [10,10]  |
| chr6:139283047  | REPS1   | coding_exon | ENST00000258062:VtoA;ENST00000367663:VtoA;ENST00000367668:VtoA;ENST000 | - | TtoC | 0.1538 | 0.1667 | 5  | 2  | [12,13]  |
| chr6:139304192  | REPS1   | coding_exon | ENST00000258062:KtoE;ENST00000367663:KtoE;ENST00000367668:KtoE;ENST000 | - | AtoG | 0.1053 | 0.1818 | 5  | 2  | [19,22]  |
| chr1:8337709    | RERE    | UTR3        |                                                                        | - | GtoC | 0.1    | 0.1111 | 3  | 2  | [10,18]  |
| chr4:57490953   | REST    | coding_exon | ENST00000309042:CtoF;ENST00000358605:CtoF;                             | + | GtoT | 0.1    | 0.1    | 2  | 2  | [10,10]  |
| chr2:85422843   | RETSAT  | UTR3        |                                                                        | - | AtoG | 0.1    | 0.1429 | 4  | 2  | [10,14]  |
| chr2:85422845   | RETSAT  | UTR3        |                                                                        | - | TtoG | 0.1    | 0.1765 | 8  | 3  | [10,18]  |
| chr2:99387535   | REV1    | coding_exon | ENST00000258428:LtoP;ENST00000393445:LtoP;                             | - | TtoC | 0.1    | 0.125  | 3  | 2  | [10,16]  |
| chr2:99384163   | REV1    | coding_exon |                                                                        | - | TtoG | 0.1    | 0.1    | 2  | 2  | [10,10]  |
| chr9:135261857  | REXO4   | UTR3        |                                                                        | - | AtoG | 0.1    | 0.1    | 2  | 2  | [20,30]  |
| chr4:39029482   | RFC1    | coding_exon | ENST00000349703:KtoE;ENST00000381897:KtoE;                             | - | AtoG | 0.1    | 0.1    | 4  | 3  | [10,10]  |
| chr4:38982876   | RFC1    | coding_exon | ENST00000349703:IttoT;ENST00000381897:IttoT;                           | - | TtoC | 0.1667 | 0.1818 | 2  | 2  | [11,12]  |
| chr4:38994963   | RFC1    | coding_exon |                                                                        | - | TtoC | 0.1    | 0.1    | 5  | 2  | [10,10]  |
| chr4:38965698   | RFC1    | UTR3        |                                                                        | - | TtoA | 0.1    | 0.1818 | 2  | 2  | [10,11]  |
| chr4:38966417   | RFC1    | UTR3        |                                                                        | - | TtoG | 0.1    | 0.1429 | 2  | 2  | [10,14]  |
| chr4:38966664   | RFC1    | UTR3        |                                                                        | - | TtoA | 0.1    | 0.1176 | 4  | 2  | [10,17]  |
| chr12:116953656 | RFC5    | UTR3        |                                                                        | + | TtoA | 0.1    | 0.1    | 4  | 2  | [10,11]  |
| chr12:116953864 | RFC5    | UTR3        |                                                                        | + | AtoG | 0.1    | 0.2    | 3  | 2  | [10,10]  |
| chr17:30361198  | RFLL    | UTR3        |                                                                        | - | TtoC | 0.1667 | 0.1765 | 3  | 2  | [12,17]  |
| chr3:53100898   | RFT1    | UTR3        |                                                                        | - | AtoG | 0.1    | 0.1818 | 3  | 2  | [10,11]  |
| chr3:16332361   | RFTN1   | UTR3        |                                                                        | - | CtoA | 0.1    | 0.2    | 9  | 5  | [10,16]  |
| chr3:16332422   | RFTN1   | UTR3        |                                                                        | - | AtoC | 0.1029 | 0.1528 | 5  | 3  | [72,136] |
| chr1:174316958  | RFWD2   | coding_exon |                                                                        | - | AtoG | 0.1429 | 0.1538 | 8  | 2  | [14,14]  |
| chr1:174420447  | RFWD2   | mixed       |                                                                        | - | AtoG | 0.125  | 0.125  | 2  | 2  | [16,16]  |
| chr16:73212858  | RFWD3   | UTR3        |                                                                        | - | TtoA | 0.1538 | 0.2    | 2  | 2  | [13,15]  |
| chr16:73214533  | RFWD3   | UTR3        |                                                                        | - | TtoC | 0.1026 | 0.1905 | 6  | 3  | [15,39]  |
| chr19:13933566  | RFX1    | UTR3        |                                                                        | - | AtoG | 0.1    | 0.1    | 2  | 2  | [10,10]  |
| chr15:54170541  | RFX7    | mixed       |                                                                        | - | CtoT | 0.1    | 0.1    | 4  | 3  | [10,10]  |
| chr3:102766812  | RG9MTD1 | coding_exon | ENST00000309922:LtoR;                                                  | + | TtoG | 0.1    | 0.1667 | 4  | 2  | [10,12]  |
| chr1:182147948  | RGL1    | coding_exon | ENST00000304685:StoP;ENST00000360851:StoP;ENST00000367531:StoP;        | + | TtoC | 0.1    | 0.1    | 2  | 2  | [10,10]  |
| chr1:182161906  | RGL1    | coding_exon | ENST00000304685:StoC;ENST00000360851:StoC;ENST00000367531:StoC;        | + | AtoT | 0.1    | 0.1    | 2  | 2  | [10,10]  |
| chr6:33367920   | RGL2    | coding_exon | ENST00000421215:EtaA;                                                  | - | AtoC | 0.1    | 0.1    | 2  | 2  | [10,10]  |
| chr6:33369204   | RGL2    | coding_exon |                                                                        | - | TtoG | 0.1    | 0.125  | 2  | 2  | [11,16]  |
| chr6:33372812   | RGL2    | mixed       |                                                                        | - | GtoT | 0.1    | 0.1    | 2  | 2  | [10,10]  |
| chr9:35744075   | RGP1    | UTR3        |                                                                        | + | AtoG | 0.1    | 0.1667 | 2  | 2  | [10,12]  |
| chr1:190815484  | RGS1    | UTR3        |                                                                        | + | TtoC | 0.1111 | 0.129  | 7  | 3  | [17,31]  |
| chr1:190815488  | RGS1    | UTR3        |                                                                        | + | AtoG | 0.2    | 0.2105 | 16 | 2  | [10,20]  |
| chr1:190815671  | RGS1    | UTR3        |                                                                        | + | TtoA | 0.1176 | 0.1667 | 10 | 2  | [12,17]  |
| chr10:121249447 | RGS10   | UTR3        |                                                                        | - | TtoG | 0.1146 | 0.1154 | 10 | 2  | [27,102] |
| chr1:180834437  | RGS16   | UTR3        |                                                                        | - | AtoG | 0.1071 | 0.125  | 3  | 2  | [16,28]  |
| chr1:180834726  | RGS16   | UTR3        |                                                                        | - | TtoC | 0.1    | 0.1053 | 5  | 2  | [10,19]  |
| chr1:180835941  | RGS16   | UTR3        |                                                                        | - | CtoA | 0.1429 | 0.1818 | 6  | 3  | [12,14]  |
| chr20:62175086  | RGS19   | UTR3        |                                                                        | - | AtoG | 0.1    | 0.1818 | 4  | 2  | [10,11]  |
| chr20:62181092  | RGS19   | UTR5        |                                                                        | - | TtoA | 0.1    | 0.125  | 2  | 2  | [10,16]  |
| chr1:191044930  | RGS2    | coding_exon | ENST00000235382:TtoP;                                                  | + | AtoC | 0.1    | 0.1    | 2  | 2  | [10,11]  |
| chr2:227568551  | RHBDD1  | UTR3        |                                                                        | + | TtoA | 0.1    | 0.1111 | 2  | 2  | [10,10]  |
| chr2:227569287  | RHBDD1  | UTR3        |                                                                        | + | TtoC | 0.1    | 0.1429 | 7  | 2  | [10,14]  |
| chr7:150795122  | RHEB    | UTR3        |                                                                        | - | CtoT | 0.9667 | 1      | 17 | 17 | [32,61]  |
| chr12:47745404  | RHEBL1  | mixed       |                                                                        | - | AtoG | 0.1    | 0.1667 | 2  | 2  | [10,12]  |
| chr12:47745441  | RHEBL1  | mixed       |                                                                        | - | TtoC | 0.1    | 0.1538 | 2  | 2  | [13,20]  |
| chr3:49371592   | RHOA    | UTR3        |                                                                        | - | AtoG | 0.1667 | 0.25   | 4  | 4  | [10,16]  |
| chr8:22931788   | RHOBTB2 | UTR3        |                                                                        | + | TtoC | 0.1    | 0.1667 | 5  | 3  | [11,14]  |
| chr1:113045277  | RHOC    | UTR3        |                                                                        | - | AtoG | 0.1    | 0.2857 | 6  | 5  | [10,14]  |

|                 |         |             |                                                                         |   |      |        |        |    |    |          |
|-----------------|---------|-------------|-------------------------------------------------------------------------|---|------|--------|--------|----|----|----------|
| chr1:113045280  | RHOC    | UTR3        |                                                                         | - | TtoC | 0.1667 | 0.2917 | 6  | 6  | [12,149] |
| chr11:3804790   | RHOG    | mixed       |                                                                         | - | TtoC | 0.1176 | 0.1364 | 6  | 2  | [17,22]  |
| chr11:3804794   | RHOG    | mixed       |                                                                         | - | TtoA | 0.15   | 0.1667 | 3  | 2  | [12,20]  |
| chr4:39922176   | RHOH    | mixed       |                                                                         | + | GtoA | 0.1    | 0.1053 | 2  | 2  | [10,19]  |
| chr2:46656889   | RHOQ    | coding_exon | ENST00000238738:TtoA;                                                   | + | AtoG | 0.1    | 0.2    | 11 | 3  | [16,20]  |
| chr2:46657244   | RHOQ    | coding_exon | ENST00000238738:NtoS;                                                   | + | AtoG | 0.1    | 0.2    | 9  | 6  | [10,23]  |
| chr2:46656827   | RHOQ    | coding_exon | ENST00000238738:KtoR;                                                   | + | AtoG | 0.125  | 0.1818 | 4  | 4  | [11,26]  |
| chr2:46623828   | RHOQ    | coding_exon | ENST00000238738:Atot;                                                   | + | GtoA | 0.1111 | 0.1154 | 4  | 2  | [26,27]  |
| chr2:46656774   | RHOQ    | coding_exon |                                                                         | + | TtoC | 0.1667 | 0.2857 | 5  | 4  | [10,14]  |
| chr2:46656828   | RHOQ    | coding_exon |                                                                         | + | AtoG | 0.1429 | 0.1667 | 5  | 4  | [12,26]  |
| chr17:27527103  | RHOT1   | coding_exon | ENST00000333942:Itov;ENST00000354266:Itov;ENST00000358365:Itov;ENST0000 | + | AtoG | 0.3571 | 0.8182 | 4  | 4  | [11,15]  |
| chr17:27526465  | RHOT1   | coding_exon | ENST00000333942:DtoN;ENST00000354266:DtoN;ENST00000358365:DtoN;ENST0    | + | GtoA | 0.1818 | 0.9091 | 5  | 5  | [10,15]  |
| chr17:27576504  | RHOT1   | UTR3        |                                                                         | + | GtoA | 0.1111 | 0.125  | 4  | 2  | [16,18]  |
| chr16:661000    | RHOT2   | coding_exon | ENST00000315082:DtoE;                                                   | + | TtoA | 0.1143 | 0.2    | 5  | 2  | [25,35]  |
| chr16:660999    | RHOT2   | coding_exon | ENST00000315082:DtoA;                                                   | + | AtoC | 0.129  | 0.2381 | 5  | 2  | [21,31]  |
| chr16:664135    | RHOT2   | UTR3        |                                                                         | + | TtoA | 0.1053 | 0.1538 | 5  | 2  | [13,20]  |
| chr11:205073    | RIC8A   | UTR3        |                                                                         | + | AtoG | 0.15   | 0.1538 | 5  | 2  | [13,20]  |
| chr2:152029058  | RIF1    | mixed       |                                                                         | + | AtoG | 0.1    | 0.1053 | 2  | 2  | [10,19]  |
| chr2:152034482  | RIF1    | mixed       |                                                                         | + | TtoC | 0.1    | 0.1    | 5  | 2  | [10,10]  |
| chr1:42653052   | RIMKLA  | coding_exon |                                                                         | + | TtoC | 0.1    | 0.1111 | 2  | 2  | [18,20]  |
| chr5:96538748   | RIOK2   | coding_exon | ENST00000283109:Itot;                                                   | - | TtoC | 0.1    | 0.1    | 2  | 2  | [10,10]  |
| chr5:96528974   | RIOK2   | coding_exon |                                                                         | - | TtoA | 0.1111 | 0.2    | 7  | 2  | [10,18]  |
| chr18:19311144  | RIOK3   | coding_exon | ENST00000339486:WtoR;ENST00000424813:WtoR;ENST00000453294:WtoR;         | + | TtoA | 0.1111 | 0.1429 | 6  | 4  | [14,36]  |
| chr18:19311143  | RIOK3   | coding_exon |                                                                         | + | CtoG | 0.1081 | 0.1667 | 7  | 6  | [12,56]  |
| chr18:19298040  | RIOK3   | mixed       |                                                                         | + | GtoA | 0.1    | 0.1    | 3  | 2  | [10,20]  |
| chr18:19315455  | RIOK3   | UTR3        |                                                                         | + | TtoA | 0.1    | 0.1579 | 5  | 2  | [10,19]  |
| chr18:19315985  | RIOK3   | UTR3        |                                                                         | + | TtoA | 0.125  | 0.1818 | 8  | 2  | [11,16]  |
| chr8:90871727   | RIPK2   | coding_exon | ENST00000220751:Etog;                                                   | + | AtoG | 0.1    | 0.1667 | 7  | 2  | [12,40]  |
| chr1:154136661  | RIT1    | UTR3        |                                                                         | - | AtoG | 0.1    | 0.1818 | 5  | 2  | [10,11]  |
| chr6:151796000  | RMND1   | mixed       |                                                                         | - | AtoG | 0.125  | 0.1333 | 4  | 2  | [15,16]  |
| chr2:86852259   | RMND5A  | coding_exon | ENST00000283632:QtoP;                                                   | + | AtoC | 0.1    | 0.1    | 3  | 2  | [10,10]  |
| chr5:31445181   | RNASEN  | coding_exon | ENST00000265075:LtoQ;ENST00000344624:LtoQ;ENST00000442743:LtoQ;         | - | TtoA | 0.1053 | 0.1538 | 5  | 2  | [14,19]  |
| chr5:31562752   | RNASEN  | coding_exon |                                                                         | - | AtoG | 0.1    | 0.1    | 2  | 2  | [10,10]  |
| chr6:16727246   | RNASET2 | coding_exon | ENST00000310843:YtoC;                                                   | - | AtoG | 0.2    | 0.4    | 4  | 3  | [10,11]  |
| chr12:119482921 | RNF10   | coding_exon | ENST00000325954:HtoP;ENST00000413266:HtoP;ENST00000458409:HtoP;         | + | AtoC | 0.15   | 0.1905 | 5  | 2  | [20,21]  |
| chr12:119499165 | RNF10   | UTR3        |                                                                         | + | TtoC | 0.1    | 0.1    | 2  | 2  | [10,10]  |
| chr20:48002833  | RNF114  | UTR3        |                                                                         | + | TtoC | 0.1053 | 0.1111 | 7  | 2  | [19,27]  |
| chr20:48003503  | RNF114  | UTR3        |                                                                         | + | AtoG | 0.1053 | 0.1176 | 5  | 2  | [17,19]  |
| chr1:144398437  | RNF115  | coding_exon | ENST00000369291:WtoR;                                                   | + | TtoA | 0.1034 | 0.2    | 8  | 3  | [21,51]  |
| chr11:71383533  | RNF121  | coding_exon | ENST00000361756:StoP;                                                   | + | TtoC | 0.1    | 0.2143 | 9  | 2  | [10,14]  |
| chr19:598871    | RNF126  | UTR3        |                                                                         | - | GtoC | 0.1    | 0.12   | 2  | 2  | [10,25]  |
| chr5:141338332  | RNF14   | coding_exon | ENST00000347642:NtoS;ENST00000356143:NtoS;ENST00000394514:NtoS;ENST00   | + | AtoG | 0.1538 | 0.1667 | 6  | 2  | [12,13]  |
| chr5:141343255  | RNF14   | coding_exon | ENST00000347642:LtoQ;ENST00000356143:LtoQ;ENST00000394514:LtoQ;ENST00   | + | TtoA | 0.1333 | 0.1429 | 3  | 2  | [14,15]  |
| chr5:141343159  | RNF14   | coding_exon | ENST00000347642:LtoP;ENST00000356143:LtoP;ENST00000394514:LtoP;ENST00   | + | TtoC | 0.1    | 0.1111 | 2  | 2  | [10,18]  |
| chr5:141333490  | RNF14   | mixed       |                                                                         | - | CtoT | 0.1    | 0.25   | 2  | 2  | [10,12]  |
| chr5:158517130  | RNF145  | UTR3        |                                                                         | - | GtoT | 0.1    | 0.1053 | 3  | 2  | [10,19]  |
| chr2:101276911  | RNF149  | coding_exon |                                                                         | - | AtoG | 0.1    | 0.1    | 2  | 2  | [10,10]  |
| chr17:4788761   | RNF167  | coding_exon | ENST00000262482:HtoP;ENST00000381350:HtoP;                              | + | AtoC | 0.1111 | 0.1613 | 6  | 2  | [31,36]  |
| chr3:197699951  | RNF168  | coding_exon | ENST00000318037:Atog;                                                   | - | CtoG | 0.1    | 0.1    | 4  | 2  | [10,10]  |
| chr11:74225412  | RNF169  | coding_exon | ENST00000299563:GtoR;                                                   | + | GtoA | 0.1    | 0.1    | 2  | 2  | [10,10]  |
| chr2:85678216   | RNF181  | mixed       |                                                                         | + | AtoA | 0.8    | 0.9    | 3  | 3  | [10,11]  |
| chr2:85678215   | RNF181  | UTR3        |                                                                         | + | CtoA | 0.3571 | 0.6429 | 12 | 12 | [10,25]  |
| chr22:29913229  | RNF185  | coding_exon | ENST00000266252:VtoA;ENST00000326132:VtoA;ENST00000419966:VtoA;ENST00   | + | TtoC | 0.1    | 0.1    | 5  | 2  | [10,10]  |
| chr22:29913036  | RNF185  | UTR5        |                                                                         | + | TtoC | 0.1    | 0.1111 | 3  | 2  | [10,18]  |
| chr8:101338885  | RNF19A  | UTR3        |                                                                         | - | TtoC | 0.1    | 0.1429 | 9  | 3  | [10,27]  |
| chr8:101339083  | RNF19A  | UTR3        |                                                                         | - | TtoC | 0.1    | 0.1    | 5  | 2  | [10,10]  |
| chr8:101339372  | RNF19A  | UTR3        |                                                                         | - | TtoG | 0.1    | 0.125  | 5  | 2  | [10,16]  |
| chr1:183328838  | RNF2    | coding_exon | ENST00000367510:RtoW;                                                   | + | CtoT | 0.1    | 0.1667 | 2  | 2  | [10,12]  |
| chr1:183328830  | RNF2    | coding_exon | ENST00000367510:PtoL;                                                   | + | CtoT | 0.1    | 0.2    | 2  | 2  | [10,10]  |
| chr1:183323332  | RNF2    | coding_exon | ENST00000367509:NtoK;ENST00000367510:NtoK;                              | + | CtoA | 0.1    | 0.2    | 3  | 3  | [10,14]  |
| chr1:183327334  | RNF2    | coding_exon | ENST00000367509:EtoK;ENST00000367510:EtoK;                              | + | GtoA | 0.1    | 0.1    | 2  | 2  | [10,10]  |
| chr1:183327390  | RNF2    | coding_exon | ENST00000367509:EtoD;ENST00000367510:EtoD;                              | + | AtoT | 0.1    | 0.2632 | 5  | 3  | [10,19]  |
| chr1:183327446  | RNF2    | coding_exon | ENST00000367509:CtoS;ENST00000367510:CtoS;                              | + | GtoC | 0.1    | 0.1667 | 6  | 3  | [10,12]  |
| chr1:183327381  | RNF2    | coding_exon |                                                                         | + | AtoG | 0.1    | 0.3    | 6  | 5  | [10,20]  |
| chr9:103337640  | RNF20   | coding_exon |                                                                         | + | AtoG | 0.1    | 0.1    | 2  | 2  | [10,10]  |
| chr9:103365412  | RNF20   | UTR3        |                                                                         | + | TtoC | 0.1    | 0.125  | 3  | 2  | [10,24]  |
| chr17:75934795  | RNF213  | coding_exon | ENST00000336301:Itov;                                                   | + | AtoG | 0.1818 | 0.2    | 3  | 2  | [11,15]  |
| chr17:75972086  | RNF213  | coding_exon |                                                                         | + | CtoA | 0.1071 | 0.1333 | 2  | 2  | [15,28]  |
| chr7:5629239    | RNF216  | coding_exon | ENST00000447067:HtoP;                                                   | - | AtoC | 0.1    | 0.2222 | 8  | 6  | [10,37]  |
| chr7:5747445    | RNF216  | coding_exon |                                                                         | - | TtoC | 0.1    | 0.1    | 5  | 2  | [10,10]  |
| chr7:5628718    | RNF216  | UTR3        |                                                                         | - | AtoG | 0.1    | 0.1579 | 4  | 2  | [10,19]  |
| chr13:78088393  | RNF219  | coding_exon | ENST00000282003:Kto*;                                                   | - | AtoT | 0.1    | 0.1    | 2  | 2  | [10,10]  |
| chr1:44874470   | RNF220  | coding_exon |                                                                         | + | GtoC | 0.1    | 0.1    | 2  | 2  | [10,10]  |
| chr2:219237062  | RNF25   | coding_exon |                                                                         | - | TtoC | 0.1    | 0.1    | 2  | 2  | [10,10]  |
| chr11:118713207 | RNF26   | mixed       |                                                                         | + | GtoA | 0.1    | 0.1    | 2  | 2  | [10,10]  |
| chr14:23686898  | RNF31   | coding_exon | ENST00000324103:MtoL;ENST00000382682:MtoL;                              | + | AtoC | 1      | 1      | 6  | 6  | [13,33]  |
| chr14:23699696  | RNF31   | UTR3        |                                                                         | + | AtoG | 0.1667 | 0.25   | 5  | 2  | [12,18]  |
| chr12:120338508 | RNF34   | coding_exon | ENST00000354795:GtoE;ENST00000361234:GtoE;ENST00000392465:GtoE;         | + | GtoA | 0.1053 | 0.125  | 2  | 2  | [16,20]  |
| chr9:36328592   | RNF38   | UTR3        |                                                                         | - | AtoG | 0.1    | 0.2    | 2  | 2  | [10,10]  |
| chr9:36329353   | RNF38   | UTR3        |                                                                         | - | TtoG | 0.1    | 0.1429 | 2  | 2  | [10,14]  |
| chr16:30693883  | RNF40   | UTR3        |                                                                         | + | TtoG | 0.1087 | 0.25   | 7  | 6  | [12,46]  |
| chr16:30693974  | RNF40   | UTR3        |                                                                         | + | TtoG | 0.1111 | 0.1818 | 2  | 2  | [11,18]  |
| chr12:54886482  | RNF41   | UTR3        |                                                                         | - | TtoC | 0.1    | 0.1818 | 3  | 2  | [10,12]  |
| chr3:142947235  | RNF7    | UTR3        |                                                                         | + | CtoA | 0.1    | 0.7    | 2  | 2  | [10,11]  |
| chr6:37457058   | RNF8    | coding_exon | ENST00000373479:LtoP;                                                   | + | TtoC | 0.1    | 0.2    | 2  | 2  | [10,10]  |
| chr6:37436229   | RNF8    | coding_exon |                                                                         | + | AtoG | 0.1    | 0.125  | 2  | 2  | [10,16]  |
| chr6:37444708   | RNF8    | coding_exon |                                                                         | + | AtoG | 0.1    | 0.1    | 2  | 2  | [10,20]  |
| chr6:89671197   | RNGTT   | coding_exon | ENST00000265607:StoA;ENST00000369475:StoA;ENST00000369485:StoA;         | - | TtoG | 0.1429 | 0.1818 | 4  | 2  | [11,14]  |
| chr6:89377239   | RNGTT   | UTR3        |                                                                         | - | TtoA | 0.1    | 0.1429 | 4  | 2  | [10,14]  |
| chr11:494825    | RNH1    | UTR5        |                                                                         | - | AtoG | 0.1111 | 0.1212 | 3  | 2  | [33,54]  |
| chr18:13754208  | RNMT    | UTR3        |                                                                         | + | AtoG | 0.1    | 0.1364 | 10 | 3  | [10,22]  |
| chr17:642180    | RNMTL1  | UTR3        |                                                                         | + | TtoA | 0.1111 | 0.1111 | 5  | 2  | [10,36]  |
| chr1:200241832  | RNPEP   | UTR3        |                                                                         | + | AtoG | 0.1    | 0.15   | 3  | 2  | [10,20]  |
| chr2:241166521  | RNPEPL1 | UTR3        |                                                                         | + | AtoG | 0.119  | 0.122  | 2  | 2  | [42,42]  |
| chr16:2254575   | RNPS1   | coding_exon | ENST00000320225:RtoM;ENST00000397086:RtoM;                              | - | GtoT | 0.1017 | 0.2698 | 18 | 12 | [32,73]  |
| chr16:2243294   | RNPS1   | UTR3        |                                                                         | - | AtoG | 0.1389 | 0.1429 | 11 | 3  | [23,49]  |

|                 |               |             |                                                                                                           |   |      |        |        |    |    |           |
|-----------------|---------------|-------------|-----------------------------------------------------------------------------------------------------------|---|------|--------|--------|----|----|-----------|
| chr1:154294917  | ROBLD3        | UTR3        |                                                                                                           | + | TtoA | 0.1111 | 0.2    | 3  | 3  | [10,11]   |
| chr3:78729988   | ROBO1         | UTR3        |                                                                                                           | - | AtoG | 0.1    | 0.1818 | 2  | 2  | [10,11]   |
| chr18:16818446  | ROCK1         | coding_exon | ENST00000399799:LtoV;                                                                                     | - | TtoG | 0.1    | 0.1333 | 4  | 2  | [10,15]   |
| chr18:16849401  | ROCK1         | coding_exon | ENST00000399799:LtoM;                                                                                     | - | TtoA | 0.1    | 0.1538 | 3  | 2  | [10,13]   |
| chr2:11240651   | ROCK2         | UTR3        |                                                                                                           | - | AtoG | 0.1    | 0.1818 | 2  | 2  | [10,11]   |
| chr9:114025989  | ROD1          | coding_exon | ENST00000343327:HtoR;ENST00000374255:HtoR;ENST00000374257:HtoR;ENST00000374257:HtoV;ENST00000374257:HtoM; | - | AtoG | 0.1    | 0.1    | 3  | 2  | [10,20]   |
| chr9:114026264  | ROD1          | coding_exon | ENST00000343327:GtoV;ENST00000374255:GtoV;ENST00000374257:GtoV;ENST00000374257:HtoV;ENST00000374257:HtoM; | - | GtoT | 0.1    | 0.1    | 4  | 2  | [10,10]   |
| chr9:114021089  | ROD1          | UTR3        |                                                                                                           | - | AtoG | 0.1    | 0.1515 | 11 | 4  | [35,77]   |
| chr1:152947273  | RP11-274N19.1 | mixed       |                                                                                                           | - | AtoC | 0.1273 | 0.1667 | 3  | 3  | [18,55]   |
| chr10:13679499  | RP11-295P9.1  | mixed       |                                                                                                           | + | CtoA | 0.1    | 0.1    | 3  | 2  | [10,10]   |
| chr10:13692142  | RP11-295P9.1  | mixed       |                                                                                                           | + | AtoG | 0.1    | 0.1538 | 4  | 2  | [10,13]   |
| chr9:114273771  | RP11-32M23.1  | mixed       |                                                                                                           | - | AtoT | 0.1    | 0.125  | 4  | 2  | [10,16]   |
| chr11:17206620  | RP11-452G18.1 | mixed       |                                                                                                           | + | GtoC | 0.1    | 0.1351 | 4  | 2  | [10,38]   |
| chr11:17206626  | RP11-452G18.1 | mixed       |                                                                                                           | + | GtoC | 0.1    | 0.1333 | 2  | 2  | [10,16]   |
| chr11:17206627  | RP11-452G18.1 | mixed       |                                                                                                           | + | GtoT | 0.1538 | 0.3    | 3  | 2  | [10,13]   |
| chr11:17206663  | RP11-452G18.1 | mixed       |                                                                                                           | + | TtoA | 0.1    | 0.1538 | 3  | 2  | [13,31]   |
| chr11:17206672  | RP11-452G18.1 | mixed       |                                                                                                           | + | AtoT | 0.1    | 0.1818 | 5  | 3  | [10,11]   |
| chr11:17206673  | RP11-452G18.1 | mixed       |                                                                                                           | + | TtoA | 0.1    | 0.2    | 6  | 5  | [10,12]   |
| chr10:103328649 | RP11-529I10.1 | mixed       |                                                                                                           | + | AtoT | 0.1    | 0.1053 | 4  | 2  | [10,19]   |
| chr9:5978482    | RP11-546N22.1 | mixed       |                                                                                                           | - | GtoA | 0.1    | 0.1    | 3  | 2  | [10,10]   |
| chr3:52554606   | RP11-844E22.1 | coding_exon |                                                                                                           | + | TtoC | 0.1    | 0.1    | 5  | 2  | [10,10]   |
| chr22:48990776  | RP3-402G11.1  | coding_exon | ENST00000380903:CtoG;ENST00000400016:CtoG;                                                                | + | TtoG | 0.1    | 0.1429 | 3  | 2  | [10,14]   |
| chr22:48989119  | RP3-402G11.1  | coding_exon |                                                                                                           | + | TtoC | 0.1    | 0.1053 | 2  | 2  | [10,19]   |
| chr20:36484294  | RP4-564F22.1  | mixed       |                                                                                                           | - | GtoT | 0.1    | 0.1    | 2  | 2  | [10,10]   |
| chr1:87101270   | RP4-604K5.1   | UTR3        |                                                                                                           | - | TtoG | 0.1111 | 0.1667 | 6  | 2  | [12,18]   |
| chr20:33328542  | RP4-614O4.1   | mixed       |                                                                                                           | - | TtoC | 0.1    | 0.1111 | 4  | 2  | [10,10]   |
| chr20:33328566  | RP4-614O4.1   | mixed       |                                                                                                           | - | TtoA | 0.1081 | 0.1429 | 5  | 2  | [14,37]   |
| chr20:33330138  | RP4-614O4.1   | mixed       |                                                                                                           | - | GtoA | 0.1818 | 0.4    | 2  | 2  | [10,12]   |
| chr20:33330143  | RP4-614O4.1   | mixed       |                                                                                                           | - | TtoC | 0.1333 | 0.35   | 11 | 8  | [13,35]   |
| chr1:32414560   | RP4-622L5.1   | mixed       |                                                                                                           | + | TtoC | 0.1    | 0.1    | 2  | 2  | [10,10]   |
| chr20:61663214  | RP4-697K14.1  | coding_exon | ENST00000252889:StoP;ENST00000427522:StoP;ENST00000467148:StoP;                                           | - | TtoC | 0.1    | 0.1818 | 2  | 2  | [10,11]   |
| chr20:51617571  | RP4-724E16.1  | mixed       |                                                                                                           | + | AtoC | 0.1    | 0.1    | 5  | 2  | [10,10]   |
| chr20:51617829  | RP4-724E16.1  | mixed       |                                                                                                           | + | AtoG | 0.1    | 0.2    | 2  | 2  | [10,11]   |
| chr20:32331737  | RP4-785G19.1  | mixed       |                                                                                                           | - | GtoA | 0.1    | 0.1538 | 4  | 2  | [10,26]   |
| chr20:5512968   | RP5-1022P6.1  | mixed       |                                                                                                           | - | AtoG | 0.1    | 0.125  | 3  | 2  | [16,30]   |
| chr16:87332577  | RP5-1142A6.1  | mixed       |                                                                                                           | + | AtoC | 0.1    | 0.1    | 3  | 2  | [10,10]   |
| chr7:33105449   | RP9           | coding_exon | ENST00000297157:MtoK;                                                                                     | - | TtoA | 0.1364 | 0.2258 | 3  | 2  | [22,31]   |
| chr7:33105467   | RP9           | coding_exon | ENST00000297157:GtoE;                                                                                     | - | GtoA | 0.1667 | 0.2963 | 6  | 2  | [18,27]   |
| chr7:33105565   | RP9           | coding_exon | ENST00000297157:GtoD;                                                                                     | - | GtoC | 0.1    | 0.65   | 8  | 6  | [10,27]   |
| chr7:33105498   | RP9           | coding_exon | ENST00000297157:AtoT;                                                                                     | - | GtoA | 0.1111 | 0.125  | 5  | 2  | [16,18]   |
| chr7:33105520   | RP9           | coding_exon |                                                                                                           | - | CtoT | 0.1333 | 0.6154 | 12 | 7  | [15,28]   |
| chr7:33105550   | RP9           | coding_exon |                                                                                                           | - | TtoC | 0.1    | 0.825  | 8  | 8  | [10,40]   |
| chr7:7642914    | RPA3          | UTR3        |                                                                                                           | - | TtoA | 0.2308 | 0.2941 | 2  | 2  | [13,17]   |
| chr7:7642920    | RPA3          | UTR3        |                                                                                                           | - | TtoC | 0.125  | 0.2    | 5  | 2  | [10,16]   |
| chr17:5270015   | RPAIN         | coding_exon | ENST00000381208:GtoG;ENST00000381209:GtoG;ENST00000405578:GtoG;                                           | + | AtoG | 0.125  | 0.1579 | 9  | 3  | [19,40]   |
| chr15:39597542  | RPAP1         | coding_exon | ENST00000304330:VtoG;                                                                                     | - | TtoG | 0.125  | 0.1333 | 2  | 2  | [15,24]   |
| chr15:39616112  | RPAP1         | coding_exon | ENST00000304330:VtoA;                                                                                     | - | TtoC | 0.1    | 0.2143 | 2  | 2  | [10,15]   |
| chr15:39610627  | RPAP1         | coding_exon | ENST00000304330:StoT;                                                                                     | - | TtoA | 0.1    | 0.1    | 2  | 2  | [10,10]   |
| chr12:46349047  | RPAP3         | coding_exon |                                                                                                           | - | AtoG | 0.1333 | 0.1667 | 2  | 2  | [12,15]   |
| chr2:210589490  | RPE           | coding_exon |                                                                                                           | + | CtoA | 0.1053 | 0.1111 | 5  | 2  | [18,19]   |
| chr6:35545273   | RPL10A        | coding_exon | ENST00000322203:VtoG;                                                                                     | + | TtoG | 0.125  | 0.2    | 7  | 2  | [11,16]   |
| chr6:35546351   | RPL10A        | coding_exon | ENST00000322203:VtoE;                                                                                     | + | TtoA | 0.125  | 0.4    | 12 | 12 | [10,84]   |
| chr6:35546357   | RPL10A        | coding_exon | ENST00000322203:VtoD;                                                                                     | + | TtoA | 0.2941 | 0.7778 | 7  | 7  | [10,40]   |
| chr6:35544769   | RPL10A        | coding_exon | ENST00000322203:StoP;                                                                                     | + | TtoC | 0.1009 | 0.1616 | 18 | 11 | [99,233]  |
| chr6:35546456   | RPL10A        | coding_exon | ENST00000322203:RtoQ;                                                                                     | + | GtoA | 0.1364 | 0.1429 | 8  | 3  | [14,23]   |
| chr6:35546447   | RPL10A        | coding_exon | ENST00000322203:QtoR;                                                                                     | + | AtoG | 0.1277 | 0.1842 | 10 | 4  | [22,47]   |
| chr6:35546096   | RPL10A        | coding_exon | ENST00000322203:QtoP;                                                                                     | + | AtoC | 0.1327 | 0.1413 | 10 | 2  | [97,102]  |
| chr6:35546373   | RPL10A        | coding_exon | ENST00000322203:MtoI;                                                                                     | + | GtoC | 0.1    | 0.1538 | 6  | 2  | [10,13]   |
| chr6:35545281   | RPL10A        | coding_exon | ENST00000322203:LtoV;                                                                                     | + | CtoG | 0.1176 | 0.1667 | 5  | 2  | [13,17]   |
| chr6:35545270   | RPL10A        | coding_exon | ENST00000322203:LtoP;                                                                                     | + | TtoC | 0.1111 | 0.2    | 6  | 3  | [10,16]   |
| chr6:35545282   | RPL10A        | coding_exon | ENST00000322203:LtoP;                                                                                     | + | TtoC | 0.1111 | 0.4737 | 8  | 2  | [10,19]   |
| chr6:35545269   | RPL10A        | coding_exon | ENST00000322203:LtoM;                                                                                     | + | CtoA | 0.125  | 0.1935 | 6  | 4  | [13,31]   |
| chr6:35545940   | RPL10A        | coding_exon | ENST00000322203:KtoR;                                                                                     | + | AtoG | 0.1111 | 0.1333 | 7  | 2  | [15,18]   |
| chr6:35545976   | RPL10A        | coding_exon | ENST00000322203:KtoM;                                                                                     | + | AtoT | 0.1212 | 0.1944 | 8  | 3  | [45,72]   |
| chr6:35545278   | RPL10A        | coding_exon | ENST00000322203:KtoE;                                                                                     | + | AtoG | 0.1667 | 0.1818 | 2  | 2  | [11,13]   |
| chr6:35545949   | RPL10A        | coding_exon | ENST00000322203:AtoV;                                                                                     | + | CtoT | 0.125  | 0.2222 | 16 | 6  | [15,54]   |
| chr6:35546458   | RPL10A        | coding_exon | ENST00000322203:AtoT;                                                                                     | + | GtoA | 0.1    | 0.3636 | 9  | 8  | [12,53]   |
| chr6:35545957   | RPL10A        | coding_exon | ENST00000322203:AtoS;                                                                                     | + | GtoT | 0.1053 | 0.1176 | 3  | 2  | [17,19]   |
| chr6:35546459   | RPL10A        | coding_exon | ENST00000322203:AtoD;                                                                                     | + | CtoA | 0.2308 | 0.3684 | 6  | 5  | [14,23]   |
| chr6:35544432   | RPL10A        | coding_exon |                                                                                                           | + | AtoG | 0.1    | 0.1    | 2  | 2  | [10,10]   |
| chr6:35544553   | RPL10A        | coding_exon |                                                                                                           | + | GtoT | 0.1176 | 0.1818 | 5  | 4  | [11,17]   |
| chr6:35544937   | RPL10A        | coding_exon |                                                                                                           | + | AtoG | 0.1    | 0.1333 | 3  | 2  | [10,15]   |
| chr6:35545941   | RPL10A        | coding_exon |                                                                                                           | + | GtoA | 0.1    | 0.2667 | 11 | 7  | [10,32]   |
| chr6:35545947   | RPL10A        | coding_exon |                                                                                                           | + | TtoC | 0.125  | 0.1765 | 5  | 2  | [17,18]   |
| chr6:35546349   | RPL10A        | coding_exon |                                                                                                           | + | TtoA | 0.1304 | 0.3846 | 14 | 14 | [10,98]   |
| chr6:35546355   | RPL10A        | coding_exon |                                                                                                           | + | TtoA | 0.1176 | 0.3333 | 7  | 6  | [15,47]   |
| chr6:35546457   | RPL10A        | coding_exon |                                                                                                           | + | GtoA | 0.125  | 0.3571 | 13 | 12 | [10,32]   |
| chr6:35546534   | RPL10A        | UTR3        |                                                                                                           | + | TtoA | 0.8    | 0.9412 | 8  | 8  | [10,27]   |
| chr1:23891687   | RPL11         | coding_exon | ENST00000374550:QtoP;                                                                                     | + | AtoC | 0.1005 | 0.1115 | 17 | 3  | [260,487] |
| chr1:23891686   | RPL11         | coding_exon | ENST00000374550:QtoE;                                                                                     | + | CtoG | 0.104  | 0.1706 | 17 | 3  | [211,441] |
| chr1:23891684   | RPL11         | coding_exon |                                                                                                           | + | AtoT | 0.619  | 0.8    | 3  | 3  | [10,21]   |
| chr1:23891685   | RPL11         | coding_exon |                                                                                                           | + | GtoT | 0.1    | 0.2143 | 4  | 4  | [10,23]   |
| chr1:23895501   | RPL11         | UTR3        |                                                                                                           | + | AtoG | 0.1    | 0.3846 | 21 | 21 | [12,76]   |
| chr9:129252841  | RPL12         | coding_exon | ENST00000361436:PtoH;                                                                                     | - | CtoA | 0.1667 | 0.2609 | 4  | 3  | [43,70]   |
| chr9:129250509  | RPL12         | coding_exon | ENST00000361436:NtoD;                                                                                     | - | AtoG | 0.1084 | 0.1593 | 17 | 3  | [173,391] |
| chr9:129250469  | RPL12         | coding_exon | ENST00000361436:MtoT;                                                                                     | - | TtoC | 0.1119 | 0.1566 | 11 | 7  | [64,172]  |
| chr9:129252851  | RPL12         | coding_exon | ENST00000361436:KtoE;                                                                                     | - | AtoG | 0.1429 | 0.1739 | 4  | 3  | [78,121]  |
| chr9:129251783  | RPL12         | coding_exon | ENST00000361436:ItoS;                                                                                     | - | TtoG | 0.1026 | 0.1029 | 4  | 2  | [68,157]  |
| chr9:129250464  | RPL12         | coding_exon | ENST00000361436:HtoD;                                                                                     | - | CtoG | 0.1101 | 0.1824 | 13 | 7  | [45,289]  |
| chr9:129250465  | RPL12         | coding_exon |                                                                                                           | - | GtoA | 0.1105 | 0.1799 | 12 | 5  | [43,265]  |
| chr9:129250477  | RPL12         | coding_exon |                                                                                                           | - | TtoC | 0.1011 | 0.1754 | 16 | 9  | [58,418]  |
| chr9:129251397  | RPL12         | coding_exon |                                                                                                           | - | AtoG | 0.1007 | 0.1272 | 21 | 7  | [97,216]  |
| chr9:129251767  | RPL12         | coding_exon |                                                                                                           | - | TtoG | 0.1333 | 0.1351 | 11 | 2  | [32,38]   |
| chr9:129252840  | RPL12         | coding_exon |                                                                                                           | - | CtoG | 0.1163 | 0.2838 | 6  | 4  | [43,76]   |
| chr9:129249774  | RPL12         | UTR3        |                                                                                                           | - | AtoG | 0.1818 | 0.4    | 7  | 4  | [12,16]   |
| chr9:129249775  | RPL12         | UTR3        |                                                                                                           | - | GtoA | 0.1034 | 0.4167 | 16 | 12 | [14,365]  |

|                |           |             |                                                                    |       |        |        |        |    |            |             |
|----------------|-----------|-------------|--------------------------------------------------------------------|-------|--------|--------|--------|----|------------|-------------|
| chr9:129249776 | RPL12     | UTR3        | -                                                                  | GtoA  | 0.101  | 0.4118 | 18     | 16 | [64,499]   |             |
| chr9:129249777 | RPL12     | UTR3        | -                                                                  | TtoA  | 0.1477 | 0.3962 | 9      | 9  | [70,1092]  |             |
| chr9:129253492 | RPL12     | UTR5        | -                                                                  | GtoT  | 0.1296 | 0.2128 | 8      | 3  | [47,54]    |             |
| chr9:129253493 | RPL12     | UTR5        | -                                                                  | GtoC  | 0.102  | 0.1951 | 7      | 5  | [28,52]    |             |
| chr9:129253495 | RPL12     | UTR5        | -                                                                  | TtoG  | 0.1111 | 0.1667 | 3      | 2  | [18,25]    |             |
| chr16:88156977 | RPL13     | UTR3        | +                                                                  | TtoC  | 0.1002 | 0.1471 | 19     | 9  | [544,1204] |             |
| chr16:88157877 | RPL13     | UTR3        | +                                                                  | AttoG | 0.1    | 0.2353 | 8      | 4  | [10,17]    |             |
| chr16:88157879 | RPL13     | UTR3        | +                                                                  | AttoG | 0.1333 | 0.1333 | 3      | 2  | [15,15]    |             |
| chr19:54686524 | RPL13A    | coding_exon | ENST00000391857:VtoI;                                              | +     | GtoA   | 0.1    | 0.2727 | 7  | 4          | [10,21]     |
| chr19:54686148 | RPL13A    | coding_exon | ENST00000391857:RtoC;                                              | +     | CtoT   | 0.2308 | 0.2667 | 5  | 2          | [14,15]     |
| chr19:54682699 | RPL13A    | coding_exon | ENST00000391857:MtoL;                                              | +     | AtoC   | 0.1    | 0.1765 | 11 | 8          | [13,127]    |
| chr19:54682701 | RPL13A    | coding_exon | ENST00000391857:MtoI;                                              | +     | GtoC   | 0.1287 | 0.4286 | 13 | 12         | [19,160]    |
| chr19:54685363 | RPL13A    | coding_exon | ENST00000391857:KtoQ;                                              | +     | AtoC   | 0.1039 | 0.1481 | 6  | 3          | [27,97]     |
| chr19:54685365 | RPL13A    | coding_exon | ENST00000391857:KtoN;                                              | +     | GtoT   | 0.1111 | 0.175  | 10 | 4          | [19,124]    |
| chr19:54685333 | RPL13A    | coding_exon | ENST00000391857:IttoV;                                             | +     | AttoG  | 0.1067 | 0.1366 | 18 | 7          | [230,745]   |
| chr19:54682702 | RPL13A    | coding_exon | ENST00000391857:AttoS;                                             | +     | GtoT   | 0.1171 | 0.44   | 12 | 12         | [21,180]    |
| chr19:54685294 | RPL13A    | coding_exon |                                                                    | +     | CtoT   | 0.2    | 0.5    | 6  | 6          | [12,30]     |
| chr19:54685299 | RPL13A    | coding_exon |                                                                    | +     | AttoG  | 0.1818 | 0.8571 | 8  | 8          | [11,25]     |
| chr19:54686115 | RPL13A    | coding_exon |                                                                    | +     | CtoA   | 0.1    | 0.2308 | 3  | 3          | [10,15]     |
| chr19:54686529 | RPL13A    | coding_exon |                                                                    | +     | CtoA   | 0.1    | 0.1667 | 6  | 3          | [10,13]     |
| chr19:54687356 | RPL13A    | UTR3        | +                                                                  | AttoG | 0.1098 | 0.1429 | 6      | 3  | [35,84]    |             |
| chr19:54687358 | RPL13A    | UTR3        | +                                                                  | AttoG | 0.1176 | 0.1875 | 13     | 7  | [16,56]    |             |
| chr19:54687359 | RPL13A    | UTR3        | +                                                                  | TtoA  | 0.1053 | 0.2609 | 4      | 3  | [15,23]    |             |
| chr19:54682677 | RPL13A    | UTR5        | +                                                                  | CtoT  | 0.125  | 0.2    | 4      | 4  | [10,24]    |             |
| chr19:54682689 | RPL13A    | UTR5        | +                                                                  | GtoT  | 0.1333 | 0.3077 | 4      | 2  | [13,15]    |             |
| chr19:54682691 | RPL13A    | UTR5        | +                                                                  | TtoC  | 0.1154 | 0.1875 | 5      | 2  | [16,27]    |             |
| chr19:54682692 | RPL13A    | UTR5        | +                                                                  | GtoC  | 0.1176 | 0.6098 | 12     | 8  | [11,43]    |             |
| chr19:54682693 | RPL13A    | UTR5        | +                                                                  | CtoT  | 0.1538 | 0.55   | 10     | 6  | [14,40]    |             |
| chr19:54682698 | RPL13A    | UTR5        | +                                                                  | GtoT  | 0.1132 | 0.1739 | 10     | 5  | [18,116]   |             |
| chr13:53912812 | RPL13AP22 | UTR3        | -                                                                  | AttoG | 0.1875 | 0.3043 | 2      | 2  | [23,50]    |             |
| chr13:53912816 | RPL13AP22 | UTR3        | -                                                                  | TtoC  | 0.1667 | 0.1935 | 2      | 2  | [30,62]    |             |
| chr12:6863341  | RPL13P5   | mixed       |                                                                    | +     | CtoG   | 0.1    | 0.1667 | 2  | 2          | [10,18]     |
| chr12:6863804  | RPL13P5   | mixed       |                                                                    | +     | TtoC   | 0.1    | 0.1    | 2  | 2          | [10,10]     |
| chr3:40474421  | RPL14     | coding_exon | ENST00000338970:YtoN;ENST00000396203:YtoN;ENST00000416518:YtoN;    | +     | TtoA   | 0.1667 | 0.1667 | 4  | 2          | [13,13]     |
| chr3:40477958  | RPL14     | coding_exon | ENST00000338970:Wto*;ENST00000396203:Wto*;ENST00000416518:Wto*;    | +     | GtoA   | 0.1    | 0.2093 | 12 | 10         | [17,53]     |
| chr3:40474416  | RPL14     | coding_exon | ENST00000338970:VtoG;ENST00000396203:VtoG;ENST00000416518:VtoG;    | +     | TtoG   | 0.3    | 0.6    | 7  | 4          | [11,26]     |
| chr3:40477970  | RPL14     | coding_exon | ENST00000338970:RtoQ;ENST00000396203:RtoQ;ENST00000416518:RtoQ;    | +     | GtoA   | 0.2222 | 0.8182 | 6  | 6          | [10,14]     |
| chr3:40478441  | RPL14     | coding_exon | ENST00000338970:RtoI;ENST00000396203:RtoI;                         | +     | GtoA   | 0.1    | 0.1    | 6  | 2          | [20,20]     |
| chr3:40477969  | RPL14     | coding_exon | ENST00000338970:RtoG;ENST00000396203:RtoG;ENST00000416518:RtoG;    | +     | CtoG   | 0.5    | 0.6923 | 3  | 3          | [13,14]     |
| chr3:40475194  | RPL14     | coding_exon | ENST00000338970:MtoV;ENST00000396203:MtoV;ENST00000416518:MtoV;    | +     | AttoG  | 0.1    | 0.1667 | 6  | 3          | [10,13]     |
| chr3:40475195  | RPL14     | coding_exon | ENST00000338970:MtoR;ENST00000396203:MtoR;ENST00000416518:MtoR;    | +     | TtoG   | 0.1667 | 0.2143 | 5  | 2          | [14,18]     |
| chr3:40478156  | RPL14     | coding_exon | ENST00000338970:MtoI;ENST00000396203:MtoI;ENST00000416518:MtoI;    | +     | GtoA   | 0.1    | 0.1667 | 11 | 4          | [10,34]     |
| chr3:40475200  | RPL14     | coding_exon | ENST00000338970:LtoI;ENST00000396203:LtoI;ENST00000416518:LtoI;    | +     | CtoA   | 0.1    | 0.1212 | 2  | 2          | [10,33]     |
| chr3:40478111  | RPL14     | coding_exon | ENST00000338970:KtoN;ENST00000396203:KtoN;ENST00000416518:KtoN;    | +     | GtoT   | 0.1765 | 0.1818 | 5  | 2          | [11,17]     |
| chr3:40478148  | RPL14     | coding_exon | ENST00000338970:KtoE;ENST00000396203:KtoE;ENST00000416518:KtoE;    | +     | AttoG  | 0.1    | 0.1333 | 7  | 2          | [16,22]     |
| chr3:40478445  | RPL14     | coding_exon | ENST00000338970:ItoM;ENST00000396203:ItoM;ENST00000416518:ItoM;    | +     | AttoG  | 0.1    | 0.1    | 5  | 2          | [10,20]     |
| chr3:40478107  | RPL14     | coding_exon | ENST00000338970:AttoV;ENST00000396203:AttoV;ENST00000416518:AttoV; | +     | CtoT   | 0.4    | 0.9    | 3  | 3          | [10,14]     |
| chr3:40478106  | RPL14     | coding_exon | ENST00000338970:AttoT;ENST00000396203:AttoT;ENST00000416518:AttoT; | +     | GtoA   | 0.2    | 0.9091 | 3  | 3          | [11,13]     |
| chr3:40477962  | RPL14     | coding_exon |                                                                    | +     | AttoG  | 0.1034 | 0.125  | 6  | 2          | [16,29]     |
| chr3:40477968  | RPL14     | coding_exon |                                                                    | +     | AttoG  | 0.1538 | 0.1765 | 6  | 2          | [13,18]     |
| chr3:40478476  | RPL14     | mixed       |                                                                    | +     | GtoA   | 0.1    | 0.3    | 3  | 3          | [10,12]     |
| chr3:40478567  | RPL14     | mixed       |                                                                    | +     | CtoA   | 0.1364 | 0.2083 | 3  | 2          | [66,170]    |
| chr3:40478670  | RPL14     | mixed       |                                                                    | +     | TtoC   | 0.1525 | 0.2308 | 6  | 2          | [27,62]     |
| chr3:40478690  | RPL14     | mixed       |                                                                    | +     | AttoG  | 0.1818 | 0.5    | 7  | 6          | [10,16]     |
| chr3:40478840  | RPL14     | UTR3        |                                                                    | +     | AttoG  | 0.1765 | 0.3    | 4  | 2          | [10,17]     |
| chr12:61645723 | RPL14P1   | coding_exon | ENST00000266610:TtoS;                                              | +     | AttoT  | 1      | 1      | 2  | 2          | [10,11]     |
| chr12:61645721 | RPL14P1   | coding_exon | ENST00000266610:KtoR;                                              | +     | AttoG  | 1      | 1      | 2  | 2          | [11,12]     |
| chr3:23933626  | RPL15     | UTR5        |                                                                    | +     | TtoG   | 0.2105 | 0.6364 | 2  | 2          | [11,19]     |
| chr18:45271796 | RPL17P20  | coding_exon | ENST00000418495:StoP;ENST00000441578:StoP;                         | -     | TtoC   | 0.1111 | 0.1667 | 4  | 2          | [13,18]     |
| chr18:45271908 | RPL17P20  | coding_exon | ENST00000418495:PtoL;ENST00000441578:PtoL;                         | -     | CtoT   | 0.12   | 0.28   | 9  | 5          | [26,92]     |
| chr18:45271790 | RPL17P20  | coding_exon | ENST00000418495:LtoI;ENST00000441578:LtoI;                         | -     | CtoA   | 0.1053 | 0.1538 | 5  | 2          | [13,19]     |
| chr18:45271178 | RPL17P20  | coding_exon | ENST00000332968:VtoF;ENST00000418495:VtoF;ENST00000441578:VtoF;    | -     | GtoT   | 0.1111 | 0.413  | 16 | 13         | [36,108]    |
| chr18:45271785 | RPL17P20  | coding_exon | ENST00000332968:VtoE;                                              | -     | TtoA   | 0.1    | 0.1176 | 2  | 2          | [10,17]     |
| chr18:45271177 | RPL17P20  | coding_exon | ENST00000332968:VtoA;ENST00000418495:VtoA;ENST00000441578:VtoA;    | -     | TtoC   | 0.1111 | 0.4444 | 15 | 14         | [19,115]    |
| chr18:45270877 | RPL17P20  | coding_exon | ENST00000332968:StoI;ENST00000418495:StoI;ENST00000441578:StoI;    | -     | GtoT   | 0.1053 | 0.3788 | 10 | 8          | [25,68]     |
| chr18:45271294 | RPL17P20  | coding_exon | ENST00000332968:NtoS;ENST00000418495:NtoS;ENST00000441578:NtoS;    | -     | AttoG  | 0.1    | 0.7692 | 4  | 4          | [10,29]     |
| chr18:45271293 | RPL17P20  | coding_exon | ENST00000332968:NtoK;ENST00000418495:NtoK;ENST00000441578:NtoK;    | -     | CtoA   | 0.6    | 0.7692 | 3  | 3          | [10,30]     |
| chr18:45270836 | RPL17P20  | coding_exon | ENST00000332968:NtoD;ENST00000418495:NtoD;ENST00000441578:NtoD;    | -     | AttoG  | 0.1    | 0.1    | 4  | 2          | [10,10]     |
| chr18:45270826 | RPL17P20  | coding_exon | ENST00000332968:LtoH;ENST00000418495:LtoH;ENST00000441578:LtoH;    | -     | TtoA   | 0.1    | 0.2308 | 3  | 3          | [10,13]     |
| chr18:45270884 | RPL17P20  | coding_exon | ENST00000332968:KtoQ;ENST00000418495:KtoQ;ENST00000441578:KtoQ;    | -     | AttoC  | 0.1429 | 0.2308 | 11 | 2          | [21,42]     |
| chr18:45271180 | RPL17P20  | coding_exon | ENST00000332968:GtoA;ENST00000418495:GtoA;ENST00000441578:GtoA;    | -     | GtoC   | 0.1    | 0.2069 | 11 | 6          | [22,75]     |
| chr18:45271198 | RPL17P20  | coding_exon | ENST00000332968:FtoS;ENST00000418495:FtoS;ENST00000441578:FtoS;    | -     | TtoC   | 0.4444 | 0.9091 | 6  | 6          | [10,14]     |
| chr18:45271199 | RPL17P20  | coding_exon | ENST00000332968:FtoL;ENST00000418495:FtoL;ENST00000441578:FtoL;    | -     | TtoC   | 0.1    | 0.1    | 3  | 2          | [10,10]     |
| chr18:45271782 | RPL17P20  | coding_exon | ENST00000332968:FtoC;                                              | -     | TtoG   | 0.1333 | 0.1429 | 4  | 2          | [14,15]     |
| chr18:45270841 | RPL17P20  | coding_exon | ENST00000332968:EtoG;ENST00000418495:EtoG;ENST00000441578:EtoG;    | -     | AttoG  | 0.1    | 0.1538 | 3  | 3          | [10,27]     |
| chr18:45270840 | RPL17P20  | coding_exon | ENST00000332968:EtoD;ENST00000418495:EtoD;ENST00000441578:EtoD;    | -     | GtoT   | 0.1    | 0.3571 | 11 | 7          | [10,24]     |
| chr18:45271168 | RPL17P20  | coding_exon | ENST00000332968:CtoS;ENST00000418495:CtoS;ENST00000441578:CtoS;    | -     | GtoC   | 0.1228 | 0.125  | 5  | 2          | [56,171]    |
| chr18:45270875 | RPL17P20  | coding_exon | ENST00000332968:AttoS;ENST00000418495:AttoS;ENST00000441578:AttoS; | -     | GtoT   | 0.1    | 0.1429 | 8  | 2          | [21,36]     |
| chr18:45270832 | RPL17P20  | coding_exon | ENST00000332968:AttoD;ENST00000418495:AttoD;ENST00000441578:AttoD; | -     | CtoA   | 0.1    | 0.15   | 3  | 2          | [10,20]     |
| chr18:45270825 | RPL17P20  | coding_exon |                                                                    | -     | TtoG   | 0.2    | 0.2667 | 3  | 2          | [10,15]     |
| chr18:45270879 | RPL17P20  | coding_exon |                                                                    | -     | GtoA   | 0.1316 | 0.1707 | 8  | 3          | [37,41]     |
| chr18:45271170 | RPL17P20  | coding_exon |                                                                    | -     | GtoA   | 0.1231 | 0.1299 | 4  | 2          | [66,179]    |
| chr18:45271179 | RPL17P20  | coding_exon |                                                                    | -     | AttoG  | 0.1039 | 0.2143 | 14 | 9          | [29,77]     |
| chr18:45271182 | RPL17P20  | coding_exon |                                                                    | -     | TtoG   | 0.1111 | 0.2222 | 8  | 2          | [18,19]     |
| chr18:45271197 | RPL17P20  | coding_exon |                                                                    | -     | CtoT   | 0.2308 | 0.7273 | 8  | 8          | [10,14]     |
| chr18:45272833 | RPL17P20  | UTR5        |                                                                    | -     | AttoT  | 0.1111 | 0.1944 | 8  | 2          | [37,54]     |
| chr18:45272835 | RPL17P20  | UTR5        |                                                                    | -     | GtoT   | 0.1    | 0.1818 | 9  | 4          | [10,34]     |
| chr18:45272837 | RPL17P20  | UTR5        |                                                                    | -     | AttoC  | 0.1429 | 0.48   | 14 | 8          | [11,42]     |
| chr19:53810958 | RPL18     | coding_exon | ENST00000084795:HtoP;                                              | -     | AttoC  | 0.1122 | 0.229  | 7  | 4          | [2198,4164] |
| chr19:53810960 | RPL18     | coding_exon |                                                                    | -     | GtoC   | 0.1126 | 0.138  | 4  | 3          | [2740,4456] |
| chr19:17835121 | RPL18A    | UTR3        |                                                                    | +     | GtoA   | 0.1127 | 0.1158 | 12 | 2          | [97,147]    |
| chr19:17831735 | RPL18A    | UTR5        |                                                                    | +     | TtoC   | 0.12   | 0.4667 | 9  | 9          | [15,68]     |
| chr17:34612810 | RPL19P12  | coding_exon | ENST00000225430:VtoA;                                              | +     | TtoC   | 0.1068 | 0.2121 | 11 | 7          | [204,409]   |
| chr17:34612840 | RPL19P12  | coding_exon | ENST00000225430:RtoH;                                              | +     | GtoA   | 0.1    | 0.2045 | 8  | 5          | [136,316]   |
| chr17:34612101 | RPL19P12  | coding_exon | ENST00000225430:QtoK;                                              | +     | CtoA   | 0.1522 | 0.1538 | 5  | 2          | [47,52]     |
| chr17:34612846 | RPL19P12  | coding_exon | ENST00000225430:ItoQ;                                              | +     | TtoA   | 0.1031 | 0.1053 | 11 | 2          | [106,139]   |





|                 |         |             |                                                                                     |   |      |        |        |    |    |            |
|-----------------|---------|-------------|-------------------------------------------------------------------------------------|---|------|--------|--------|----|----|------------|
| chr8:74366006   | RPL7    | coding_exon | ENST00000352983:HtoD;ENST00000396465:HtoD;ENST00000396466:HtoD;ENST00000396467:HtoD | - | CtoG | 0.1176 | 0.25   | 6  | 4  | [17,54]    |
| chr8:74365987   | RPL7    | coding_exon | ENST00000352983:GtoE;ENST00000396465:GtoE;ENST00000396466:GtoE;ENST00000396467:GtoE | - | GtoA | 0.1071 | 0.4167 | 5  | 5  | [11,32]    |
| chr8:74367095   | RPL7    | coding_exon | ENST00000352983:Atot;ENST00000396465:Atot;ENST00000396466:Atot;ENST00000396467:Atot | - | GtoA | 0.1    | 0.2308 | 10 | 5  | [10,20]    |
| chr8:74366353   | RPL7    | coding_exon | ENST00000352983:Atos;ENST00000396465:Atos;ENST00000396466:Atos;ENST00000396467:Atos | - | GtoT | 0.1    | 0.3077 | 2  | 2  | [10,13]    |
| chr8:74365986   | RPL7    | coding_exon |                                                                                     | - | Atog | 0.1111 | 0.4444 | 6  | 6  | [10,27]    |
| chr8:74366007   | RPL7    | coding_exon |                                                                                     | - | TtoA | 0.1053 | 0.2273 | 6  | 5  | [17,57]    |
| chr8:74367093   | RPL7    | coding_exon |                                                                                     | - | Atog | 0.2667 | 0.3636 | 3  | 2  | [11,16]    |
| chr8:74367102   | RPL7    | coding_exon |                                                                                     | - | GtoA | 0.125  | 0.25   | 13 | 2  | [12,16]    |
| chr8:74367484   | RPL7    | mixed       |                                                                                     | - | Atog | 0.1176 | 0.4667 | 7  | 4  | [12,18]    |
| chr8:74367485   | RPL7    | mixed       |                                                                                     | - | Atog | 0.1    | 0.4545 | 9  | 9  | [10,51]    |
| chr8:74367495   | RPL7    | mixed       |                                                                                     | - | Atog | 0.1091 | 0.1111 | 5  | 2  | [27,58]    |
| chr8:74367507   | RPL7    | mixed       |                                                                                     | - | CtoA | 0.1429 | 0.2941 | 7  | 3  | [17,40]    |
| chr8:74367534   | RPL7    | mixed       |                                                                                     | - | Atot | 0.1724 | 0.1818 | 4  | 2  | [22,30]    |
| chr8:74367535   | RPL7    | mixed       |                                                                                     | - | Atoc | 0.1034 | 0.125  | 6  | 2  | [24,29]    |
| chr8:74367545   | RPL7    | mixed       |                                                                                     | - | Atot | 0.1176 | 0.1667 | 6  | 3  | [12,35]    |
| chr8:74367556   | RPL7    | mixed       |                                                                                     | - | Atot | 0.2222 | 0.4    | 3  | 3  | [14,20]    |
| chr8:74365438   | RPL7    | UTR3        |                                                                                     | - | Atog | 0.1    | 0.186  | 14 | 9  | [14,44]    |
| chr8:74365440   | RPL7    | UTR3        |                                                                                     | - | TtoG | 0.1    | 0.25   | 10 | 5  | [13,36]    |
| chr8:74368419   | RPL7    | UTR5        |                                                                                     | - | CtoT | 0.1    | 0.2727 | 2  | 2  | [11,20]    |
| chr8:74368422   | RPL7    | UTR5        |                                                                                     | - | CtoG | 0.1818 | 0.2222 | 2  | 2  | [10,11]    |
| chr9:135206617  | RPL7A   | coding_exon | ENST00000323345:YtoD;                                                               | + | TtoG | 0.1026 | 0.1579 | 9  | 4  | [21,52]    |
| chr9:135206293  | RPL7A   | coding_exon | ENST00000323345:QtoP;                                                               | + | Atoc | 0.1154 | 0.1282 | 8  | 2  | [26,41]    |
| chr9:135206606  | RPL7A   | coding_exon | ENST00000323345:LtoQ;                                                               | + | TtoA | 0.1184 | 0.1416 | 5  | 2  | [79,116]   |
| chr9:135206611  | RPL7A   | coding_exon | ENST00000323345:HtoD;                                                               | + | CtoG | 0.1034 | 0.1111 | 7  | 3  | [47,58]    |
| chr9:135206928  | RPL7A   | coding_exon | ENST00000315731:VtoA;ENST00000323345:VtoA;ENST00000412126:VtoA;                     | + | TtoC | 0.1358 | 0.1784 | 10 | 3  | [180,572]  |
| chr9:135207313  | RPL7A   | coding_exon | ENST00000315731:VtoA;ENST00000323345:VtoA;ENST00000412126:VtoA;                     | + | TtoC | 0.1034 | 0.2353 | 17 | 5  | [72,138]   |
| chr9:135206930  | RPL7A   | coding_exon | ENST00000315731:TtoA;ENST00000323345:TtoA;ENST00000412126:TtoA;                     | + | Atog | 0.1107 | 0.1181 | 15 | 3  | [257,305]  |
| chr9:135206280  | RPL7A   | coding_exon | ENST00000315731:LtoR;ENST00000323345:YtoD;ENST00000412126:LtoR;                     | + | TtoG | 0.1111 | 0.1143 | 10 | 2  | [65,74]    |
| chr9:135207295  | RPL7A   | coding_exon | ENST00000315731:LtoR;ENST00000323345:LtoR;ENST00000412126:LtoR;                     | + | TtoG | 0.1048 | 0.1361 | 9  | 2  | [131,163]  |
| chr9:135206279  | RPL7A   | coding_exon | ENST00000315731:LtoI;ENST00000412126:LtoI;                                          | + | CtoA | 0.1096 | 0.1111 | 12 | 2  | [75,136]   |
| chr9:135206953  | RPL7A   | coding_exon | ENST00000315731:KtoN;ENST00000323345:KtoN;ENST00000412126:KtoN;                     | + | Atoc | 0.1111 | 0.1296 | 5  | 3  | [54,152]   |
| chr9:135206954  | RPL7A   | coding_exon | ENST00000315731:Atos;ENST00000323345:Atos;ENST00000412126:Atos;                     | + | GtoT | 0.1132 | 0.1689 | 7  | 4  | [53,149]   |
| chr9:135206300  | RPL7A   | coding_exon |                                                                                     | + | Atoc | 0.102  | 0.2174 | 9  | 7  | [23,49]    |
| chr9:135206610  | RPL7A   | coding_exon |                                                                                     | + | CtoA | 0.1071 | 0.1364 | 8  | 2  | [22,57]    |
| chr9:135207245  | RPL7A   | coding_exon |                                                                                     | + | Atoc | 0.1176 | 0.1364 | 5  | 2  | [17,22]    |
| chr9:135207246  | RPL7A   | coding_exon |                                                                                     | + | CtoG | 0.1    | 0.125  | 7  | 3  | [16,25]    |
| chr9:135207676  | RPL7A   | coding_exon |                                                                                     | + | Atoc | 0.1111 | 0.25   | 6  | 4  | [10,18]    |
| chr9:135208006  | RPL7A   | coding_exon |                                                                                     | + | GtoA | 0.1    | 0.1429 | 5  | 2  | [22,71]    |
| chr9:135208009  | RPL7A   | coding_exon |                                                                                     | + | Atog | 0.5    | 0.9286 | 13 | 13 | [10,39]    |
| chr9:135205687  | RPL7A   | mixed       |                                                                                     | + | GtoA | 0.1111 | 0.1304 | 10 | 4  | [24,38]    |
| chr9:135205695  | RPL7A   | mixed       |                                                                                     | + | Atog | 0.1    | 0.6667 | 5  | 4  | [10,19]    |
| chr9:135205704  | RPL7A   | mixed       |                                                                                     | + | Atot | 0.2727 | 0.4118 | 3  | 3  | [11,17]    |
| chr9:135205705  | RPL7A   | mixed       |                                                                                     | + | GtoC | 0.1    | 0.1053 | 3  | 2  | [10,20]    |
| chr9:135205706  | RPL7A   | mixed       |                                                                                     | + | Atot | 0.1    | 0.1667 | 7  | 2  | [13,20]    |
| chr9:135205708  | RPL7A   | mixed       |                                                                                     | + | TtoC | 0.1    | 0.2    | 11 | 5  | [10,38]    |
| chr9:135205711  | RPL7A   | mixed       |                                                                                     | + | TtoC | 0.1    | 0.3333 | 13 | 6  | [16,48]    |
| chr9:135205712  | RPL7A   | mixed       |                                                                                     | + | GtoT | 0.1    | 0.2632 | 11 | 5  | [10,25]    |
| chr9:135206222  | RPL7A   | mixed       |                                                                                     | + | CtoA | 0.1667 | 0.1667 | 2  | 2  | [12,12]    |
| chr9:135206225  | RPL7A   | mixed       |                                                                                     | + | Atot | 0.1818 | 0.3    | 2  | 2  | [10,11]    |
| chr9:135206250  | RPL7A   | mixed       |                                                                                     | + | GtoC | 0.1111 | 0.1444 | 6  | 2  | [57,90]    |
| chr9:135208075  | RPL7A   | UTR3        |                                                                                     | + | TtoA | 0.1176 | 0.15   | 4  | 2  | [17,20]    |
| chr9:135208076  | RPL7A   | UTR3        |                                                                                     | + | Atog | 0.1333 | 0.1739 | 4  | 2  | [15,23]    |
| chr9:135208096  | RPL7A   | UTR3        |                                                                                     | + | TtoC | 0.1    | 0.1053 | 7  | 2  | [10,19]    |
| chr9:135204908  | RPL7A   | UTR5        |                                                                                     | + | CtoT | 0.1364 | 0.3333 | 12 | 9  | [10,41]    |
| chr9:135204914  | RPL7A   | UTR5        |                                                                                     | + | CtoT | 0.1103 | 0.1133 | 9  | 2  | [417,667]  |
| chr6:42959248   | RPL7L1  | coding_exon | ENST00000304734:RtoG;ENST00000493763:RtoG;                                          | + | CtoG | 0.1667 | 0.2609 | 2  | 2  | [23,24]    |
| chr6:42959280   | RPL7L1  | coding_exon |                                                                                     | + | CtoT | 0.1579 | 0.1765 | 4  | 2  | [17,19]    |
| chr6:42960335   | RPL7L1  | coding_exon |                                                                                     | + | CtoT | 0.1111 | 0.25   | 6  | 4  | [15,27]    |
| chr8:145985959  | RPL8    | UTR3        |                                                                                     | - | CtoG | 0.1    | 0.25   | 10 | 7  | [10,29]    |
| chr8:145985960  | RPL8    | UTR3        |                                                                                     | - | CtoA | 0.1    | 0.125  | 5  | 2  | [10,16]    |
| chr4:39132150   | RPL9    | UTR3        |                                                                                     | - | CtoA | 0.8594 | 1      | 15 | 15 | [19,101]   |
| chr4:39132151   | RPL9    | UTR3        |                                                                                     | - | CtoA | 0.3511 | 0.9158 | 16 | 16 | [66,286]   |
| chr4:39136913   | RPL9    | UTR5        |                                                                                     | - | Atot | 0.14   | 0.3333 | 11 | 5  | [15,50]    |
| chr4:39136914   | RPL9    | UTR5        |                                                                                     | - | TtoA | 0.102  | 0.2308 | 6  | 5  | [13,49]    |
| chr4:39136926   | RPL9    | UTR5        |                                                                                     | - | CtoT | 0.1    | 0.2308 | 3  | 3  | [10,18]    |
| chr12:119119095 | RPLP0P3 | coding_exon | ENST00000228306:StoY;ENST00000311304:StoY;ENST00000392514:StoY;                     | - | CtoA | 0.1    | 0.125  | 4  | 2  | [16,20]    |
| chr12:119119099 | RPLP0P3 | coding_exon | ENST00000228306:Ptot;ENST00000311304:Ptot;ENST00000392514:Ptot;                     | - | CtoA | 0.125  | 0.1463 | 9  | 3  | [32,42]    |
| chr12:119120799 | RPLP0P3 | coding_exon | ENST00000228306:ItoV;ENST00000392514:ItoV;                                          | - | Atog | 0.1101 | 0.1612 | 17 | 9  | [245,435]  |
| chr12:119119539 | RPLP0P3 | coding_exon | ENST00000228306:EtoV;ENST00000311304:EtoV;ENST00000392514:EtoV;                     | - | Atot | 0.1    | 0.2812 | 13 | 11 | [28,55]    |
| chr12:119119540 | RPLP0P3 | coding_exon | ENST00000228306:EtoQ;ENST00000311304:EtoQ;ENST00000392514:EtoQ;                     | - | GtoC | 0.1091 | 0.2812 | 13 | 10 | [30,60]    |
| chr12:119119094 | RPLP0P3 | coding_exon |                                                                                     | - | TtoA | 0.1    | 0.1875 | 5  | 4  | [10,16]    |
| chr12:119119097 | RPLP0P3 | coding_exon |                                                                                     | - | Atog | 0.1429 | 0.1579 | 7  | 2  | [14,20]    |
| chr12:119119103 | RPLP0P3 | coding_exon |                                                                                     | - | TtoA | 0.125  | 0.1569 | 5  | 2  | [42,52]    |
| chr12:119119553 | RPLP0P3 | coding_exon |                                                                                     | - | GtoT | 0.125  | 0.1333 | 4  | 2  | [16,60]    |
| chr12:119119556 | RPLP0P3 | coding_exon |                                                                                     | - | CtoT | 0.1111 | 0.2308 | 7  | 4  | [13,40]    |
| chr12:119118906 | RPLP0P3 | UTR3        |                                                                                     | - | Atog | 0.1    | 0.2727 | 3  | 2  | [11,20]    |
| chr12:119118907 | RPLP0P3 | UTR3        |                                                                                     | - | Atog | 0.1579 | 0.25   | 3  | 3  | [12,19]    |
| chr12:119118912 | RPLP0P3 | UTR3        |                                                                                     | - | Atog | 0.1304 | 0.3077 | 8  | 5  | [10,24]    |
| chr12:119118916 | RPLP0P3 | UTR3        |                                                                                     | - | Atog | 0.1    | 0.1923 | 9  | 3  | [13,26]    |
| chr12:119118917 | RPLP0P3 | UTR3        |                                                                                     | - | CtoA | 0.1333 | 0.3    | 10 | 3  | [10,27]    |
| chr12:119118931 | RPLP0P3 | UTR3        |                                                                                     | - | TtoA | 0.1034 | 0.1429 | 9  | 4  | [28,39]    |
| chr12:119118942 | RPLP0P3 | UTR3        |                                                                                     | - | Atog | 0.1053 | 0.1875 | 11 | 5  | [39,248]   |
| chr12:119118943 | RPLP0P3 | UTR3        |                                                                                     | - | CtoA | 0.1279 | 0.2727 | 10 | 5  | [48,301]   |
| chr15:67534883  | RPLP1   | coding_exon | ENST00000260379:FtoV;ENST00000357790:FtoV;                                          | + | TtoG | 0.102  | 0.1039 | 13 | 3  | [763,1126] |
| chr15:67534933  | RPLP1   | UTR3        |                                                                                     | + | Atog | 0.1028 | 0.18   | 13 | 9  | [31,113]   |
| chr15:67534934  | RPLP1   | UTR3        |                                                                                     | + | Atog | 0.1628 | 0.1739 | 8  | 2  | [23,43]    |
| chr15:67534940  | RPLP1   | UTR3        |                                                                                     | + | CtoA | 0.1176 | 0.3333 | 4  | 3  | [12,17]    |
| chr15:67532218  | RPLP1   | UTR5        |                                                                                     | + | CtoT | 0.125  | 0.1429 | 7  | 2  | [14,16]    |
| chr11:802873    | RPLP2   | UTR3        |                                                                                     | + | TtoA | 0.2273 | 0.6    | 6  | 6  | [10,37]    |
| chr11:802874    | RPLP2   | UTR3        |                                                                                     | + | CtoA | 0.1364 | 0.5455 | 8  | 8  | [11,32]    |
| chr11:799963    | RPLP2   | UTR5        |                                                                                     | + | CtoT | 0.1    | 0.1562 | 4  | 2  | [10,32]    |
| chr11:799968    | RPLP2   | UTR5        |                                                                                     | + | CtoT | 0.1045 | 0.1915 | 11 | 6  | [48,152]   |
| chr3:129821566  | RPN1    | UTR3        |                                                                                     | - | GtoT | 0.1053 | 0.2308 | 6  | 5  | [13,51]    |
| chr3:129821777  | RPN1    | UTR3        |                                                                                     | - | TtoG | 0.1176 | 0.1667 | 10 | 3  | [12,18]    |
| chr3:58277310   | RPP14   | coding_exon | ENST00000295959:LtoR;ENST00000445193:LtoR;ENST00000466547:LtoR;                     | + | TtoG | 0.1    | 0.1176 | 5  | 2  | [10,18]    |
| chr18:31827254  | RPRD1A  | coding_exon | ENST00000337059:KtoM;ENST00000357384:KtoM;ENST00000399022:KtoM;                     | - | Atot | 0.1    | 0.1111 | 3  | 2  | [10,19]    |



|                |          |             |                                                                                     |   |      |        |        |    |    |             |
|----------------|----------|-------------|-------------------------------------------------------------------------------------|---|------|--------|--------|----|----|-------------|
| chr18:31860863 | RPRD1A   | coding_exon | ENST00000319040:Etoc;ENST00000337059:Etoc;ENST00000357384:Etoc;ENST00000337059:Etoc | - | GtoC | 0.1    | 0.1667 | 3  | 2  | [12,20]     |
| chr20:36152230 | RPRD1B   | UTR3        |                                                                                     | + | TtoC | 0.1    | 0.1538 | 2  | 2  | [14,20]     |
| chr1:148710871 | RPRD2    | coding_exon | ENST00000369068:DtoE;ENST00000401000:DtoE;                                          | + | CtoG | 0.1    | 0.1    | 2  | 2  | [10,10]     |
| chr1:148711099 | RPRD2    | coding_exon |                                                                                     | + | AtoG | 0.1    | 0.1429 | 2  | 2  | [10,14]     |
| chr6:34500537  | RPS10    | coding_exon | ENST00000326199:YtoC;ENST00000344700:YtoC;ENST00000374053:YtoC;                     | - | AtoG | 0.1359 | 0.3333 | 6  | 5  | [29,110]    |
| chr6:34500556  | RPS10    | coding_exon | ENST00000326199:WtoR;ENST00000344700:WtoR;ENST00000374053:WtoR;                     | - | TtoC | 0.103  | 0.1576 | 17 | 4  | [59,244]    |
| chr6:34500549  | RPS10    | coding_exon | ENST00000326199:HtoR;ENST00000344700:HtoR;ENST00000374053:HtoR;                     | - | AtoG | 0.1157 | 0.1407 | 9  | 2  | [124,138]   |
| chr6:34500550  | RPS10    | coding_exon | ENST00000326199:HtoD;ENST00000344700:HtoD;ENST00000374053:HtoD;                     | - | CtoG | 0.1333 | 0.1589 | 9  | 3  | [105,199]   |
| chr6:34493216  | RPS10    | UTR3        |                                                                                     | - | AtoG | 0.2308 | 0.3    | 5  | 2  | [10,13]     |
| chr6:34493219  | RPS10    | UTR3        |                                                                                     | - | AtoG | 0.1023 | 0.2245 | 16 | 8  | [50,118]    |
| chr6:34493220  | RPS10    | UTR3        |                                                                                     | - | AtoG | 0.1383 | 0.3179 | 19 | 19 | [104,360]   |
| chr19:54691503 | RPS11P5  | UTR5        |                                                                                     | + | CtoT | 0.1148 | 0.1795 | 9  | 7  | [39,79]     |
| chr6:133180392 | RPS12    | UTR3        |                                                                                     | + | TtoC | 0.1053 | 0.2174 | 11 | 3  | [19,42]     |
| chr6:133180394 | RPS12    | UTR3        |                                                                                     | + | AtoG | 0.1143 | 0.5294 | 13 | 13 | [14,67]     |
| chr6:133180396 | RPS12    | UTR3        |                                                                                     | + | AtoG | 0.2222 | 0.4167 | 6  | 6  | [10,34]     |
| chr6:133177410 | RPS12    | UTR5        |                                                                                     | + | TtoC | 0.1    | 0.1    | 5  | 2  | [10,10]     |
| chr11:17052531 | RPS13P2  | UTR3        |                                                                                     | - | AtoG | 0.1304 | 0.1429 | 3  | 2  | [15,23]     |
| chr11:17052532 | RPS13P2  | UTR3        |                                                                                     | - | AtoG | 0.1538 | 0.1538 | 13 | 2  | [13,14]     |
| chr11:17052533 | RPS13P2  | UTR3        |                                                                                     | - | TtoA | 0.1143 | 0.3333 | 18 | 12 | [17,59]     |
| chr11:17052535 | RPS13P2  | UTR3        |                                                                                     | - | AtoG | 0.1373 | 0.6029 | 19 | 19 | [32,158]    |
| chr11:17052536 | RPS13P2  | UTR3        |                                                                                     | - | CtoA | 0.1067 | 0.1605 | 13 | 3  | [35,81]     |
| chr11:17055773 | RPS13P2  | UTR5        |                                                                                     | - | GtoT | 0.1239 | 0.2316 | 4  | 2  | [235,465]   |
| chr11:17055777 | RPS13P2  | UTR5        |                                                                                     | - | GtoT | 0.1083 | 0.119  | 4  | 2  | [43,121]    |
| chr11:17055778 | RPS13P2  | UTR5        |                                                                                     | - | TtoC | 0.15   | 0.3556 | 5  | 4  | [21,102]    |
| chr11:17055789 | RPS13P2  | UTR5        |                                                                                     | - | CtoT | 0.1071 | 0.5152 | 4  | 3  | [17,34]     |
| chr11:17055791 | RPS13P2  | UTR5        |                                                                                     | - | TtoC | 0.2353 | 0.3529 | 2  | 2  | [17,18]     |
| chr5:149803989 | RPS14    | UTR3        |                                                                                     | - | TtoA | 0.1    | 0.1    | 6  | 2  | [10,10]     |
| chr5:149804000 | RPS14    | UTR3        |                                                                                     | - | AtoG | 0.1143 | 0.1429 | 8  | 2  | [36,49]     |
| chr5:149809492 | RPS14    | UTR5        |                                                                                     | - | TtoC | 0.1    | 0.1    | 5  | 2  | [20,20]     |
| chr16:18701786 | RPS15A   | UTR3        |                                                                                     | - | GtoA | 0.1515 | 0.2941 | 8  | 4  | [17,33]     |
| chr16:18701789 | RPS15A   | UTR3        |                                                                                     | - | CtoA | 0.1154 | 0.1667 | 11 | 6  | [42,116]    |
| chr16:18701790 | RPS15A   | UTR3        |                                                                                     | - | TtoA | 0.1455 | 0.5    | 13 | 13 | [50,235]    |
| chr19:1391483  | RPS15P5  | UTR3        |                                                                                     | + | AtoG | 0.104  | 0.1224 | 12 | 2  | [99,416]    |
| chr19:1391490  | RPS15P5  | UTR3        |                                                                                     | + | TtoC | 0.1619 | 0.6364 | 15 | 15 | [14,704]    |
| chr19:1391491  | RPS15P5  | UTR3        |                                                                                     | + | CtoG | 0.1111 | 0.1154 | 5  | 2  | [18,26]     |
| chr19:1389417  | RPS15P5  | UTR5        |                                                                                     | + | CtoT | 0.1102 | 0.1176 | 6  | 2  | [34,118]    |
| chr19:44616013 | RPS16P1  | coding_exon | ENST00000251453:YtoC;ENST00000339471:Itov;                                          | - | AtoG | 0.1538 | 0.1538 | 6  | 2  | [39,40]     |
| chr19:44616012 | RPS16P1  | coding_exon | ENST00000251453:Yto*;ENST00000339471:Itos;                                          | - | TtoG | 0.1    | 0.2632 | 10 | 7  | [19,63]     |
| chr19:44616019 | RPS16P1  | coding_exon | ENST00000251453:VtoA;ENST00000339471:WtoR;                                          | - | TtoC | 0.1    | 0.1379 | 12 | 5  | [36,139]    |
| chr19:44616022 | RPS16P1  | coding_exon | ENST00000251453:LtoQ;ENST00000339471:WtoR;                                          | - | TtoA | 0.1044 | 0.1421 | 17 | 7  | [148,320]   |
| chr19:44616003 | RPS16P1  | coding_exon | ENST00000251453:KtoN;ENST00000339471:NtoI;                                          | - | AtoT | 0.1111 | 0.2632 | 9  | 8  | [13,28]     |
| chr19:44616004 | RPS16P1  | coding_exon | ENST00000251453:KtoI;ENST00000339471:NtoI;                                          | - | AtoT | 0.1053 | 0.3043 | 14 | 11 | [10,28]     |
| chr19:44615869 | RPS16P1  | coding_exon | ENST00000251453:Kto*;                                                               | - | AtoT | 0.1053 | 0.1556 | 9  | 5  | [39,74]     |
| chr19:44615872 | RPS16P1  | coding_exon | ENST00000251453:Itol;ENST00000339471:RtoS;                                          | - | AtoC | 0.1818 | 0.5455 | 8  | 8  | [11,39]     |
| chr19:44615873 | RPS16P1  | coding_exon | ENST00000251453:Etod;ENST00000339471:RtoI;                                          | - | GtoT | 0.1875 | 0.8333 | 5  | 5  | [11,31]     |
| chr19:44615893 | RPS16P1  | coding_exon | ENST00000251453:DtoN;ENST00000339471:Wto*;                                          | - | GtoA | 0.1    | 0.1538 | 4  | 2  | [10,13]     |
| chr19:44615892 | RPS16P1  | coding_exon | ENST00000251453:DtoG;ENST00000339471:MtoV;                                          | - | AtoG | 0.1    | 0.1818 | 4  | 2  | [10,11]     |
| chr19:44615702 | RPS16P1  | UTR3        |                                                                                     | - | TtoA | 0.15   | 0.3226 | 9  | 9  | [10,44]     |
| chr19:44615703 | RPS16P1  | UTR3        |                                                                                     | - | TtoA | 0.24   | 0.4828 | 10 | 10 | [10,56]     |
| chr19:44618417 | RPS16P1  | UTR5        |                                                                                     | - | GtoT | 0.1    | 0.1429 | 3  | 3  | [10,34]     |
| chr19:44618418 | RPS16P1  | UTR5        |                                                                                     | - | TtoC | 0.1071 | 0.45   | 2  | 2  | [20,29]     |
| chr6:33352262  | RPS18    | UTR3        |                                                                                     | + | AtoG | 0.7179 | 0.9286 | 5  | 5  | [10,42]     |
| chr6:33347840  | RPS18    | UTR5        |                                                                                     | + | CtoG | 0.125  | 0.1765 | 6  | 2  | [35,56]     |
| chr22:38255047 | RPS19BP1 | UTR3        |                                                                                     | - | AtoG | 0.1667 | 0.3077 | 3  | 3  | [12,13]     |
| chr19:47067309 | RPS19P3  | UTR3        |                                                                                     | + | AtoG | 0.1009 | 0.1389 | 4  | 3  | [108,327]   |
| chr19:47067317 | RPS19P3  | UTR3        |                                                                                     | + | AtoG | 0.1205 | 0.4095 | 22 | 20 | [62,232]    |
| chr16:1952779  | RPS2     | coding_exon | ENST00000343262:WtoR;                                                               | - | TtoC | 0.1129 | 0.1452 | 12 | 4  | [197,423]   |
| chr16:1952848  | RPS2     | coding_exon | ENST00000343262:VtoL;                                                               | - | GtoT | 0.1176 | 0.1333 | 2  | 2  | [15,17]     |
| chr16:1954358  | RPS2     | coding_exon | ENST00000343262:VtoI;                                                               | - | GtoA | 0.1107 | 0.2727 | 12 | 6  | [45,303]    |
| chr16:1952657  | RPS2     | coding_exon | ENST00000343262:VtoG;                                                               | - | TtoG | 0.1012 | 0.129  | 6  | 2  | [32,173]    |
| chr16:1954357  | RPS2     | coding_exon | ENST00000343262:VtoD;                                                               | - | TtoA | 0.5217 | 0.7429 | 2  | 2  | [24,36]     |
| chr16:1952264  | RPS2     | coding_exon | ENST00000343262:TtoP;                                                               | - | AtoC | 0.1102 | 0.1389 | 9  | 2  | [124,152]   |
| chr16:1952592  | RPS2     | coding_exon | ENST00000343262:StoP;                                                               | - | TtoC | 0.1795 | 0.2667 | 5  | 3  | [16,40]     |
| chr16:1953188  | RPS2     | coding_exon | ENST00000343262:QtoI;                                                               | - | AtoT | 0.1149 | 0.1714 | 8  | 2  | [38,151]    |
| chr16:1952580  | RPS2     | coding_exon | ENST00000343262:PtoS;                                                               | - | CtoT | 0.16   | 0.4167 | 4  | 3  | [13,25]     |
| chr16:1952579  | RPS2     | coding_exon | ENST00000343262:PtoL;                                                               | - | CtoT | 0.1818 | 0.3636 | 5  | 5  | [11,23]     |
| chr16:1952586  | RPS2     | coding_exon | ENST00000343262:PtoA;                                                               | - | CtoG | 0.25   | 0.3077 | 2  | 2  | [27,40]     |
| chr16:1952504  | RPS2     | coding_exon | ENST00000343262:NtoT;                                                               | - | AtoC | 0.1    | 0.2143 | 2  | 2  | [10,14]     |
| chr16:1952872  | RPS2     | coding_exon | ENST00000343262:LtoV;                                                               | - | CtoG | 0.1111 | 0.2174 | 12 | 8  | [23,121]    |
| chr16:1952624  | RPS2     | coding_exon | ENST00000343262:LtoH;                                                               | - | TtoA | 0.1211 | 0.129  | 10 | 2  | [134,241]   |
| chr16:1952863  | RPS2     | coding_exon | ENST00000343262:KtoQ;                                                               | - | AtoC | 0.1333 | 0.4    | 8  | 8  | [10,44]     |
| chr16:1952768  | RPS2     | coding_exon | ENST00000343262:KtoN;                                                               | - | GtoT | 0.1046 | 0.1732 | 8  | 5  | [181,865]   |
| chr16:1953184  | RPS2     | coding_exon | ENST00000343262:KtoI;                                                               | - | GtoT | 0.1409 | 0.19   | 12 | 3  | [100,149]   |
| chr16:1952767  | RPS2     | coding_exon | ENST00000343262:Itol;                                                               | - | AtoC | 0.101  | 0.1875 | 9  | 6  | [209,805]   |
| chr16:1954304  | RPS2     | coding_exon | ENST00000343262:Itof;                                                               | - | AtoT | 0.1875 | 0.2    | 7  | 2  | [16,31]     |
| chr16:1952879  | RPS2     | coding_exon | ENST00000343262:HtoQ;                                                               | - | CtoG | 0.1056 | 0.1508 | 12 | 5  | [86,589]    |
| chr16:1952600  | RPS2     | coding_exon | ENST00000343262:GtoD;                                                               | - | GtoA | 0.1731 | 0.2222 | 2  | 2  | [53,120]    |
| chr16:1952501  | RPS2     | coding_exon | ENST00000343262:FtoS;                                                               | - | TtoC | 0.3043 | 0.6377 | 11 | 10 | [22,70]     |
| chr16:1952502  | RPS2     | coding_exon | ENST00000343262:FtoL;                                                               | - | TtoC | 0.1    | 0.1765 | 10 | 4  | [18,55]     |
| chr16:1952844  | RPS2     | coding_exon | ENST00000343262:Atov;                                                               | - | CtoT | 0.1667 | 0.3675 | 7  | 6  | [22,118]    |
| chr16:1952500  | RPS2     | coding_exon |                                                                                     | - | CtoT | 0.16   | 0.4839 | 10 | 10 | [31,108]    |
| chr16:1952503  | RPS2     | coding_exon |                                                                                     | - | CtoT | 0.1    | 0.2778 | 7  | 6  | [17,21]     |
| chr16:1952581  | RPS2     | coding_exon |                                                                                     | - | GtoT | 0.1111 | 0.1538 | 2  | 2  | [14,19]     |
| chr16:1954353  | RPS2     | coding_exon |                                                                                     | - | CtoA | 0.1111 | 0.3636 | 6  | 4  | [11,112]    |
| chr16:1954356  | RPS2     | coding_exon |                                                                                     | - | CtoG | 0.1111 | 0.8158 | 11 | 11 | [10,232]    |
| chr16:1954544  | RPS2     | coding_exon |                                                                                     | - | TtoG | 0.1333 | 0.1667 | 2  | 2  | [12,15]     |
| chr16:1954559  | RPS2     | coding_exon |                                                                                     | - | TtoC | 0.1026 | 0.3333 | 2  | 2  | [19,86]     |
| chr16:1952079  | RPS2     | UTR3        |                                                                                     | - | AtoG | 0.1    | 0.1667 | 5  | 2  | [12,31]     |
| chr16:1954820  | RPS2     | UTR5        |                                                                                     | - | CtoT | 0.1    | 0.12   | 5  | 2  | [25,30]     |
| chr16:1954828  | RPS2     | UTR5        |                                                                                     | - | CtoT | 0.125  | 0.1333 | 8  | 3  | [16,25]     |
| chr16:1954829  | RPS2     | UTR5        |                                                                                     | - | TtoG | 0.25   | 0.75   | 4  | 4  | [11,23]     |
| chr16:1954830  | RPS2     | UTR5        |                                                                                     | - | TtoG | 0.2    | 0.3    | 3  | 2  | [10,11]     |
| chr8:57149202  | RPS20    | coding_exon | ENST00000009589:TtoK;ENST00000427539:TtoK;                                          | - | CtoA | 0.1768 | 0.1964 | 4  | 3  | [1319,2141] |
| chr8:57148173  | RPS20    | mixed       |                                                                                     | - | TtoA | 0.2667 | 0.8182 | 6  | 6  | [11,16]     |
| chr8:57149606  | RPS20    | UTR5        |                                                                                     | - | AtoT | 0.1111 | 0.2857 | 8  | 4  | [44,58]     |
| chr8:57149607  | RPS20    | UTR5        |                                                                                     | - | GtoC | 0.1176 | 0.3333 | 11 | 5  | [21,51]     |

|                 |           |             |   |      |        |        |    |    |            |
|-----------------|-----------|-------------|---|------|--------|--------|----|----|------------|
| chr8:57149612   | RPS20     | UTR5        | - | AtoG | 0.1    | 0.12   | 7  | 2  | [10,26]    |
| chr8:57149615   | RPS20     | UTR5        | - | TtoG | 0.1111 | 0.1538 | 3  | 2  | [13,19]    |
| chr8:57149619   | RPS20     | UTR5        | - | CtoT | 0.5455 | 0.8    | 3  | 3  | [10,12]    |
| chr20:60396971  | RPS21     | UTR3        | + | AtoG | 0.3636 | 0.6    | 3  | 3  | [10,12]    |
| chr5:81606948   | RPS23     | UTR3        | - | AtoG | 0.1111 | 0.1429 | 5  | 2  | [14,18]    |
| chr5:81607022   | RPS23     | UTR3        | - | CtoT | 0.1    | 0.1818 | 2  | 2  | [10,11]    |
| chr5:81607637   | RPS23     | UTR3        | - | AtoG | 0.1    | 0.25   | 4  | 2  | [10,12]    |
| chr5:81607640   | RPS23     | UTR3        | - | AtoG | 0.1241 | 0.1932 | 15 | 15 | [91,613]   |
| chr10:79469965  | RPS24     | mixed       | + | CtoA | 0.6538 | 0.9792 | 16 | 16 | [17,90]    |
| chr10:79470461  | RPS24     | mixed       | + | AtoG | 0.1111 | 0.2143 | 12 | 7  | [11,34]    |
| chr10:79470463  | RPS24     | mixed       | + | GtoA | 0.1    | 0.2727 | 10 | 6  | [10,22]    |
| chr10:79470467  | RPS24     | mixed       | + | CtoA | 0.1111 | 0.2222 | 4  | 4  | [10,18]    |
| chr10:79470468  | RPS24     | mixed       | + | TtoA | 0.1    | 0.1111 | 2  | 2  | [10,22]    |
| chr11:118393360 | RPS25P8   | coding_exon | - | AtoC | 0.1    | 0.3    | 4  | 2  | [10,10]    |
| chr11:118393405 | RPS25P8   | coding_exon | - | AtoC | 0.1    | 0.1818 | 10 | 4  | [10,35]    |
| chr11:118393428 | RPS25P8   | coding_exon | - | AtoT | 0.1071 | 0.3    | 6  | 4  | [10,29]    |
| chr11:118393429 | RPS25P8   | coding_exon | - | AtoC | 0.1    | 0.3636 | 8  | 5  | [11,31]    |
| chr11:118393375 | RPS25P8   | coding_exon | - | AtoG | 0.1034 | 0.28   | 13 | 7  | [15,33]    |
| chr11:118393425 | RPS25P8   | coding_exon | - | TtoC | 0.1    | 0.3077 | 16 | 10 | [10,48]    |
| chr11:118393365 | RPS25P8   | coding_exon | - | TtoA | 0.1    | 0.25   | 10 | 4  | [10,16]    |
| chr11:118393885 | RPS25P8   | coding_exon | - | AtoG | 0.1111 | 0.2632 | 14 | 10 | [15,64]    |
| chr11:118393886 | RPS25P8   | coding_exon | - | AtoG | 0.2    | 0.5938 | 15 | 15 | [29,107]   |
| chr11:118393892 | RPS25P8   | coding_exon | - | AtoG | 0.1111 | 0.1163 | 11 | 2  | [86,91]    |
| chr11:118393897 | RPS25P8   | coding_exon | - | GtoA | 0.1021 | 0.1087 | 13 | 2  | [190,238]  |
| chr11:118393355 | RPS25P8   | coding_exon | - | AtoG | 0.2222 | 0.4444 | 3  | 3  | [10,22]    |
| chr11:118393376 | RPS25P8   | coding_exon | - | CtoA | 0.1111 | 0.1875 | 4  | 2  | [16,27]    |
| chr11:118393887 | RPS25P8   | coding_exon | - | CtoG | 0.1026 | 0.125  | 11 | 4  | [41,81]    |
| chr11:118394250 | RPS25P8   | UTR5        | - | AtoC | 0.1065 | 0.1304 | 10 | 3  | [186,295]  |
| chr11:118394263 | RPS25P8   | UTR5        | - | CtoT | 0.2222 | 0.6552 | 15 | 15 | [12,53]    |
| chr11:118394265 | RPS25P8   | UTR5        | - | TtoG | 0.1    | 0.3    | 5  | 3  | [10,12]    |
| chr1:152230320  | RPS27     | coding_exon | + | CtoG | 0.1111 | 0.1333 | 7  | 2  | [15,18]    |
| chr1:152230319  | RPS27     | coding_exon | + | CtoG | 0.1667 | 0.1818 | 4  | 2  | [11,12]    |
| chr1:152230681  | RPS27     | mixed       | + | CtoT | 0.1111 | 0.2262 | 17 | 6  | [46,191]   |
| chr1:152230683  | RPS27     | mixed       | + | AtoT | 0.1273 | 0.1685 | 16 | 2  | [59,92]    |
| chr1:152230727  | RPS27     | mixed       | + | CtoG | 0.1172 | 0.1719 | 3  | 2  | [64,285]   |
| chr1:152230731  | RPS27     | mixed       | + | AtoC | 0.1092 | 0.6415 | 8  | 6  | [20,120]   |
| chr1:152230743  | RPS27     | mixed       | + | CtoA | 0.1081 | 0.125  | 7  | 2  | [34,39]    |
| chr1:152230746  | RPS27     | mixed       | + | CtoA | 0.1364 | 0.1875 | 5  | 3  | [16,22]    |
| chr1:152231239  | RPS27     | UTR3        | + | AtoG | 0.1016 | 0.125  | 19 | 8  | [179,511]  |
| chr1:152231248  | RPS27     | UTR3        | + | AtoC | 0.1053 | 0.4    | 10 | 3  | [10,19]    |
| chr2:55316245   | RPS27A    | UTR3        | + | TtoA | 0.1    | 0.3793 | 11 | 11 | [29,139]   |
| chr2:55316248   | RPS27A    | UTR3        | + | CtoA | 0.1014 | 0.2273 | 13 | 5  | [22,70]    |
| chr2:55316249   | RPS27A    | UTR3        | + | AtoG | 0.1053 | 0.3333 | 11 | 6  | [15,42]    |
| chr2:55316250   | RPS27A    | UTR3        | + | TtoA | 0.1667 | 0.3333 | 4  | 4  | [12,18]    |
| chr2:55316251   | RPS27A    | UTR3        | + | TtoA | 0.1    | 0.1667 | 3  | 2  | [11,18]    |
| chr2:55313335   | RPS27A    | UTR5        | + | AtoC | 0.1    | 0.1071 | 6  | 2  | [28,30]    |
| chr19:18547045  | RPS27AP11 | UTR3        | + | GtoA | 0.1016 | 0.1268 | 15 | 3  | [188,491]  |
| chr19:18547050  | RPS27AP11 | UTR3        | + | AtoG | 0.1467 | 0.3011 | 17 | 17 | [110,246]  |
| chr19:18547053  | RPS27AP11 | UTR3        | + | TtoA | 0.1176 | 0.1667 | 6  | 2  | [18,31]    |
| chr19:18543670  | RPS27AP11 | UTR5        | + | CtoT | 0.1538 | 0.4615 | 5  | 3  | [13,47]    |
| chr19:18543705  | RPS27AP11 | UTR5        | + | GtoT | 0.1    | 0.1416 | 2  | 2  | [30,113]   |
| chr19:8292549   | RPS28     | coding_exon | + | GtoA | 0.1    | 0.1154 | 4  | 3  | [19,26]    |
| chr19:8292589   | RPS28     | coding_exon | + | TtoA | 0.3889 | 0.4    | 2  | 2  | [10,19]    |
| chr19:8292590   | RPS28     | coding_exon | + | AtoG | 0.1    | 0.4    | 3  | 3  | [10,22]    |
| chr19:8293248   | RPS28     | mixed       | + | TtoC | 0.1019 | 0.1286 | 16 | 8  | [143,513]  |
| chr19:8293264   | RPS28     | UTR3        | + | TtoA | 0.1333 | 0.1875 | 9  | 2  | [16,16]    |
| chr19:8293265   | RPS28     | UTR3        | + | TtoG | 0.1143 | 0.2667 | 4  | 2  | [16,37]    |
| chr19:8292395   | RPS28     | UTR5        | + | AtoC | 0.1667 | 0.2    | 3  | 2  | [20,36]    |
| chr14:49120045  | RPS29     | mixed       | - | CtoA | 0.1    | 0.3333 | 3  | 3  | [10,17]    |
| chr14:49122821  | RPS29     | UTR5        | - | GtoC | 0.1003 | 0.1338 | 8  | 2  | [341,804]  |
| chr14:49122838  | RPS29     | UTR5        | - | CtoT | 0.1053 | 0.1111 | 7  | 2  | [10,19]    |
| chr14:49122839  | RPS29     | UTR5        | - | AtoT | 0.1111 | 0.2    | 3  | 2  | [11,19]    |
| chr14:49122844  | RPS29     | UTR5        | - | CtoT | 0.125  | 0.2308 | 5  | 3  | [11,16]    |
| chr4:152243599  | RPS3AP47  | coding_exon | + | GtoA | 0.1    | 0.6389 | 6  | 6  | [15,55]    |
| chr4:152243671  | RPS3AP47  | coding_exon | + | GtoA | 0.1034 | 0.3333 | 15 | 14 | [14,93]    |
| chr4:152243669  | RPS3AP47  | coding_exon | + | TtoA | 0.1    | 0.3077 | 15 | 12 | [14,86]    |
| chr4:152243651  | RPS3AP47  | coding_exon | + | CtoA | 0.1042 | 0.1628 | 10 | 2  | [47,51]    |
| chr4:152243602  | RPS3AP47  | coding_exon | + | CtoT | 0.1333 | 0.549  | 6  | 6  | [31,80]    |
| chr4:152243597  | RPS3AP47  | coding_exon | + | AtoC | 0.1538 | 0.1667 | 4  | 2  | [12,14]    |
| chr4:152243598  | RPS3AP47  | coding_exon | + | GtoT | 0.125  | 0.1875 | 5  | 5  | [20,32]    |
| chr4:152243676  | RPS3AP47  | coding_exon | + | TtoA | 0.1765 | 0.2727 | 4  | 2  | [11,17]    |
| chr4:152240306  | RPS3AP47  | coding_exon | + | AtoG | 0.16   | 0.3333 | 2  | 2  | [10,26]    |
| chr4:152243665  | RPS3AP47  | coding_exon | + | GtoA | 0.1304 | 0.1333 | 10 | 3  | [30,92]    |
| chr4:152243666  | RPS3AP47  | coding_exon | + | AtoG | 0.1111 | 0.1429 | 8  | 7  | [24,77]    |
| chr4:152240304  | RPS3AP47  | coding_exon | + | CtoA | 0.1    | 0.2    | 2  | 2  | [10,15]    |
| chr4:152243517  | RPS3AP47  | coding_exon | + | CtoT | 0.1    | 0.1538 | 2  | 2  | [10,13]    |
| chr4:152245218  | RPS3AP47  | UTR3        | + | AtoG | 0.1188 | 0.1717 | 21 | 19 | [280,1215] |
| chr4:152245240  | RPS3AP47  | UTR3        | + | TtoA | 0.1714 | 0.625  | 12 | 12 | [10,35]    |
| chr4:152245241  | RPS3AP47  | UTR3        | + | GtoA | 0.1429 | 0.5    | 11 | 10 | [10,19]    |
| chr4:152245243  | RPS3AP47  | UTR3        | + | TtoA | 0.6923 | 1      | 3  | 3  | [13,15]    |
| chr4:152240239  | RPS3AP47  | UTR5        | + | CtoA | 0.1087 | 0.3333 | 3  | 2  | [15,46]    |
| chr11:74794379  | RPS3P3    | mixed       | + | AtoG | 0.1    | 0.32   | 13 | 11 | [16,73]    |
| chr11:74788227  | RPS3P3    | UTR5        | + | GtoT | 0.1163 | 0.1957 | 6  | 3  | [46,81]    |
| chr19:63590462  | RPS5      | UTR5        | + | AtoG | 0.1364 | 0.1667 | 5  | 2  | [13,24]    |
| chr19:63590467  | RPS5      | UTR5        | + | GtoC | 0.1    | 0.2973 | 5  | 4  | [19,50]    |
| chr9:19366626   | RPS6      | coding_exon | - | CtoT | 0.1078 | 0.1555 | 9  | 3  | [340,978]  |
| chr9:19368918   | RPS6      | mixed       | - | AtoT | 0.1111 | 0.5385 | 4  | 4  | [10,14]    |
| chr9:19368920   | RPS6      | mixed       | - | GtoT | 0.2    | 0.5455 | 4  | 4  | [10,13]    |
| chr9:19366252   | RPS6      | UTR3        | - | TtoA | 0.8462 | 0.8889 | 3  | 3  | [10,14]    |
| chr9:19366257   | RPS6      | UTR3        | - | TtoC | 0.1034 | 0.1667 | 9  | 5  | [16,48]    |
| chr9:19370225   | RPS6      | UTR5        | - | GtoC | 0.1579 | 0.2143 | 3  | 2  | [14,19]    |
| chr17:55342754  | RPS6KB1   | coding_exon | + | TtoC | 0.1    | 0.1    | 4  | 2  | [10,10]    |
| chr17:55344934  | RPS6KB1   | coding_exon | + | GtoA | 0.1538 | 0.1818 | 3  | 2  | [11,13]    |
| chr2:3605726    | RPS7      | coding_exon | + | GtoA | 0.1    | 0.3846 | 3  | 3  | [10,13]    |
| chr2:3605727    | RPS7      | coding_exon | + | TtoG | 0.3636 | 0.3846 | 2  | 2  | [11,13]    |
| chr2:3606381    | RPS7      | UTR3        | + | AtoG | 0.125  | 0.1579 | 13 | 2  | [20,25]    |

|                 |         |             |                                                                                      |   |      |        |        |    |    |           |
|-----------------|---------|-------------|--------------------------------------------------------------------------------------|---|------|--------|--------|----|----|-----------|
| chr2:3606382    | RPS7    | UTR3        |                                                                                      | + | GtoA | 0.1356 | 0.5    | 17 | 13 | [10,59]   |
| chr2:3606383    | RPS7    | UTR3        |                                                                                      | + | TtoA | 0.9    | 1      | 12 | 12 | [10,26]   |
| chr2:3600909    | RPS7    | UTR5        |                                                                                      | + | AtoT | 0.2    | 0.25   | 2  | 2  | [15,24]   |
| chr2:3600912    | RPS7    | UTR5        |                                                                                      | + | GtoA | 0.2174 | 0.2857 | 2  | 2  | [14,23]   |
| chr1:45014133   | RPS8    | coding_exon |                                                                                      | + | GtoC | 0.1176 | 0.1818 | 3  | 2  | [11,17]   |
| chr1:45014192   | RPS8    | coding_exon |                                                                                      | + | CtoA | 0.1379 | 0.1579 | 3  | 2  | [19,29]   |
| chr1:45014193   | RPS8    | coding_exon |                                                                                      | + | TtoG | 0.1    | 0.1333 | 8  | 3  | [15,20]   |
| chr1:45015263   | RPS8    | coding_exon |                                                                                      | + | AtoG | 0.1176 | 0.1333 | 2  | 2  | [15,17]   |
| chr1:45016998   | RPS8    | UTR3        |                                                                                      | + | CtoA | 0.3135 | 0.6118 | 19 | 19 | [124,503] |
| chr1:45016999   | RPS8    | UTR3        |                                                                                      | + | AtoG | 0.1032 | 0.1523 | 13 | 8  | [93,258]  |
| chr1:45017000   | RPS8    | UTR3        |                                                                                      | + | TtoA | 0.1316 | 0.3163 | 19 | 19 | [37,110]  |
| chr1:45013829   | RPS8    | UTR5        |                                                                                      | + | GtoC | 0.1    | 0.3    | 7  | 5  | [10,23]   |
| chr1:45013832   | RPS8    | UTR5        |                                                                                      | + | TtoG | 0.1176 | 0.1923 | 6  | 5  | [17,34]   |
| chr19:59402406  | RPS9    | mixed       |                                                                                      | + | TtoG | 0.2143 | 0.4286 | 5  | 2  | [14,14]   |
| chr19:59403320  | RPS9    | UTR3        |                                                                                      | + | CtoA | 0.1017 | 0.3968 | 10 | 10 | [26,93]   |
| chr19:59403321  | RPS9    | UTR3        |                                                                                      | + | TtoG | 0.7857 | 0.9394 | 3  | 3  | [15,35]   |
| chr19:59396540  | RPS9    | UTR5        |                                                                                      | + | CtoT | 0.12   | 0.1714 | 5  | 2  | [26,25]   |
| chr3:39428505   | RPSA    | coding_exon | ENST00000301821:WtoR;ENST00000415859:WtoR;ENST00000443003:WtoR;                      | + | TtoC | 0.1538 | 0.1739 | 2  | 2  | [14,23]   |
| chr3:39425192   | RPSA    | coding_exon | ENST00000301821:StoR;ENST00000415859:StoR;ENST00000443003:StoR;                      | + | TtoA | 0.1034 | 0.5417 | 13 | 12 | [15,65]   |
| chr3:39425202   | RPSA    | coding_exon | ENST00000301821:StoP;ENST00000415859:StoP;ENST00000443003:StoP;                      | + | TtoC | 0.1364 | 0.5455 | 10 | 10 | [11,37]   |
| chr3:39427301   | RPSA    | coding_exon | ENST00000301821:RtoL;ENST00000415859:RtoL;ENST00000443003:RtoL;                      | + | GtoT | 0.1176 | 0.1905 | 5  | 3  | [14,21]   |
| chr3:39425205   | RPSA    | coding_exon | ENST00000301821:RtoG;ENST00000415859:RtoG;ENST00000443003:RtoG;                      | + | AtoG | 0.1364 | 0.1818 | 3  | 2  | [11,22]   |
| chr3:39425116   | RPSA    | coding_exon | ENST00000301821:NtoT;ENST00000415859:NtoT;ENST00000443003:NtoT;                      | + | AtoC | 0.1    | 0.1111 | 3  | 2  | [10,10]   |
| chr3:39427358   | RPSA    | coding_exon | ENST00000301821:LtoH;ENST00000415859:LtoH;ENST00000443003:LtoH;                      | + | TtoA | 0.1    | 0.48   | 3  | 3  | [10,26]   |
| chr3:39425118   | RPSA    | coding_exon | ENST00000301821:LtoF;ENST00000415859:LtoF;ENST00000443003:LtoF;                      | + | CtoT | 0.1111 | 0.1875 | 5  | 2  | [16,18]   |
| chr3:39425196   | RPSA    | coding_exon | ENST00000301821:IttoL;ENST00000415859:IttoL;ENST00000443003:IttoL;                   | + | AtoC | 0.1463 | 0.1538 | 6  | 2  | [14,41]   |
| chr3:39428418   | RPSA    | coding_exon | ENST00000301821:EtoQ;ENST00000415859:EtoQ;ENST00000443003:EtoQ;                      | + | GtoC | 0.2    | 0.3846 | 3  | 3  | [10,14]   |
| chr3:39424185   | RPSA    | coding_exon | ENST00000301821:EtoK;ENST00000415859:EtoK;ENST00000443003:EtoK;                      | + | GtoA | 0.1667 | 0.5    | 4  | 4  | [10,15]   |
| chr3:39427348   | RPSA    | coding_exon | ENST00000301821:EtoK;ENST00000415859:EtoK;ENST00000443003:EtoK;                      | + | GtoA | 0.1111 | 0.1154 | 2  | 2  | [27,27]   |
| chr3:39424186   | RPSA    | coding_exon | ENST00000301821:EtoG;ENST00000415859:EtoG;ENST00000443003:EtoG;                      | + | AtoG | 0.4167 | 0.4545 | 2  | 2  | [11,13]   |
| chr3:39427350   | RPSA    | coding_exon | ENST00000301821:EtoD;ENST00000415859:EtoD;ENST00000443003:EtoD;                      | + | GtoT | 0.3333 | 0.5    | 6  | 5  | [16,48]   |
| chr3:39425117   | RPSA    | coding_exon |                                                                                      | + | TtoC | 0.1    | 0.2    | 5  | 3  | [10,17]   |
| chr3:39427299   | RPSA    | coding_exon |                                                                                      | + | CtoT | 0.2778 | 0.3636 | 2  | 2  | [11,20]   |
| chr3:39427359   | RPSA    | coding_exon |                                                                                      | + | TtoG | 0.1818 | 0.5789 | 3  | 3  | [12,29]   |
| chr3:39428426   | RPSA    | coding_exon |                                                                                      | + | AtoG | 0.1    | 0.1111 | 5  | 2  | [10,18]   |
| chr3:39423250   | RPSA    | UTR5        |                                                                                      | + | GtoT | 0.1    | 0.2609 | 13 | 6  | [18,49]   |
| chr3:39423253   | RPSA    | UTR5        |                                                                                      | + | GtoC | 0.1176 | 0.2097 | 10 | 6  | [11,63]   |
| chr17:76546121  | RPTOR   | coding_exon | ENST00000306801:VtoG;                                                                | + | TtoG | 0.1111 | 0.1429 | 4  | 2  | [14,18]   |
| chr3:9858733    | RPUSD3  | coding_exon | ENST00000287624:LtoP;ENST00000383820:LtoP;ENST00000424438:LtoP;ENST00000424438:LtoP; | - | TtoC | 0.1    | 0.1818 | 3  | 2  | [11,20]   |
| chr11:125577537 | RPUSD4  | UTR3        |                                                                                      | - | CtoG | 0.2    | 0.25   | 2  | 2  | [10,12]   |
| chr11:125577538 | RPUSD4  | UTR3        |                                                                                      | - | CtoA | 0.1    | 0.1    | 2  | 2  | [10,10]   |
| chr2:219168276  | RQCD1   | UTR3        |                                                                                      | + | TtoC | 0.1111 | 0.1818 | 7  | 2  | [12,19]   |
| chr1:39095307   | RRAGC   | coding_exon | ENST00000373001:LtoR;                                                                | - | TtoG | 0.1111 | 0.1538 | 3  | 2  | [10,13]   |
| chr1:39076856   | RRAGC   | UTR3        |                                                                                      | - | AtoG | 0.125  | 0.1304 | 7  | 2  | [16,23]   |
| chr6:90134588   | RRAGD   | coding_exon | ENST00000359203:VtoA;ENST00000369415:VtoA;                                           | - | TtoC | 0.1    | 0.1875 | 3  | 2  | [10,16]   |
| chr6:90134607   | RRAGD   | coding_exon | ENST00000359203:IttoV;ENST00000369415:IttoV;                                         | - | AtoG | 0.1    | 0.1333 | 3  | 2  | [10,15]   |
| chr6:90131749   | RRAGD   | UTR3        |                                                                                      | - | GtoT | 0.1    | 0.1818 | 2  | 2  | [10,11]   |
| chr6:90133093   | RRAGD   | UTR3        |                                                                                      | - | TtoC | 0.1    | 0.1364 | 3  | 2  | [10,22]   |
| chr6:90134401   | RRAGD   | UTR3        |                                                                                      | - | AtoC | 0.1176 | 0.1364 | 3  | 2  | [17,24]   |
| chr20:17571632  | RRBP1   | coding_exon | ENST00000246043:WtoR;ENST00000360807:WtoR;ENST00000377807:WtoR;ENST00000377807:WtoR; | - | TtoC | 0.1    | 0.1    | 2  | 2  | [20,21]   |
| chr20:17565286  | RRBP1   | coding_exon | ENST00000246043:VtoG;ENST00000360807:VtoG;ENST00000377807:VtoG;ENST00000377807:VtoG; | - | TtoG | 0.1143 | 0.1389 | 7  | 2  | [36,36]   |
| chr20:17588409  | RRBP1   | coding_exon |                                                                                      | - | AtoG | 0.1053 | 0.1538 | 4  | 2  | [19,26]   |
| chr20:17588436  | RRBP1   | coding_exon |                                                                                      | - | GtoC | 0.129  | 0.1765 | 4  | 2  | [17,31]   |
| chr20:17588712  | RRBP1   | coding_exon |                                                                                      | - | AtoG | 0.125  | 0.1429 | 2  | 2  | [14,16]   |
| chr20:17542591  | RRBP1   | UTR3        |                                                                                      | - | AtoC | 0.1    | 0.1667 | 2  | 2  | [10,18]   |
| chr6:7194611    | RREB1   | UTR3        |                                                                                      | + | CtoA | 0.1    | 0.1    | 2  | 2  | [10,10]   |
| chr11:4087481   | RRM1    | coding_exon | ENST00000300738:DtoG;                                                                | + | AtoG | 0.1429 | 0.1667 | 4  | 2  | [12,14]   |
| chr11:4116310   | RRM1    | UTR3        |                                                                                      | + | AtoG | 0.1111 | 0.15   | 9  | 2  | [18,20]   |
| chr11:4116404   | RRM1    | UTR3        |                                                                                      | + | GtoA | 0.1    | 0.1667 | 5  | 3  | [10,24]   |
| chr8:103320232  | RRM2B   | coding_exon | ENST00000251810:EtoG;ENST00000395910:EtoG;ENST00000395912:EtoG;                      | - | AtoG | 0.1    | 0.2727 | 5  | 3  | [10,12]   |
| chr10:99106846  | RRP12   | coding_exon | ENST00000315563:PtoA;ENST00000370992:PtoA;ENST00000414986:PtoA;                      | - | CtoG | 0.1333 | 0.1429 | 3  | 2  | [15,21]   |
| chr21:43931210  | RRP1B   | coding_exon | ENST00000340648:KtoN;ENST00000446602:KtoN;                                           | - | AtoT | 0.1    | 0.1    | 4  | 3  | [10,10]   |
| chr21:43921153  | RRP1B   | coding_exon |                                                                                      | + | TtoC | 0.1    | 0.1818 | 2  | 2  | [10,11]   |
| chr11:6578547   | RRP8    | coding_exon | ENST00000254605:VtoG;                                                                | - | TtoG | 0.125  | 0.2    | 10 | 2  | [10,16]   |
| chr11:6579148   | RRP8    | coding_exon | ENST00000254605:MtoV;                                                                | - | AtoG | 0.1    | 0.1    | 2  | 2  | [10,10]   |
| chr11:6578771   | RRP8    | coding_exon |                                                                                      | - | TtoA | 0.1    | 0.1176 | 5  | 2  | [17,20]   |
| chr17:45917274  | RSAD1   | UTR3        |                                                                                      | + | TtoC | 0.1    | 0.1    | 3  | 2  | [10,10]   |
| chr1:114121418  | RSBN1   | coding_exon | ENST00000261441:VtoE;ENST00000369581:VtoE;ENST00000434941:VtoE;                      | - | TtoA | 0.1    | 0.1    | 2  | 2  | [10,10]   |
| chr7:77245901   | RSBN1L  | coding_exon | ENST00000334955:QtoL;ENST00000445288:QtoL;                                           | + | AtoT | 0.1    | 0.1818 | 5  | 3  | [10,11]   |
| chr11:77055653  | RSF1    | coding_exon | ENST00000308488:VtoE;ENST00000360355:VtoE;                                           | - | TtoA | 0.1    | 0.1333 | 4  | 3  | [10,15]   |
| chr11:77090647  | RSF1    | coding_exon | ENST00000308488:CtoW;ENST00000360355:CtoW;                                           | - | TtoG | 0.1    | 0.1    | 2  | 2  | [10,10]   |
| chr11:77090422  | RSF1    | coding_exon |                                                                                      | - | TtoC | 0.1    | 0.1818 | 6  | 2  | [10,12]   |
| chr11:77153306  | RSF1    | coding_exon |                                                                                      | - | AtoG | 0.1    | 0.1    | 3  | 2  | [10,10]   |
| chr15:53261579  | RSL24D1 | UTR3        |                                                                                      | - | TtoC | 0.1667 | 0.2    | 6  | 2  | [16,25]   |
| chr16:55830329  | RSPRY1  | coding_exon | ENST00000394420:CtoR;                                                                | + | TtoC | 0.1    | 0.1143 | 10 | 2  | [20,37]   |
| chr16:55830959  | RSPRY1  | UTR3        |                                                                                      | + | AtoG | 0.1    | 0.1429 | 5  | 3  | [10,20]   |
| chr16:55831451  | RSPRY1  | UTR3        |                                                                                      | + | GtoT | 0.1    | 0.125  | 3  | 2  | [10,16]   |
| chr3:159555357  | RSRC1   | coding_exon |                                                                                      | + | CtoG | 0.1    | 0.1429 | 2  | 2  | [10,14]   |
| chr12:121561613 | RSRC2   | coding_exon |                                                                                      | - | TtoA | 0.1111 | 0.1667 | 7  | 2  | [12,18]   |
| chr20:61791568  | RTEL1   | mixed       |                                                                                      | + | TtoC | 0.1    | 0.1    | 2  | 2  | [10,20]   |
| chr20:61797980  | RTEL1   | mixed       |                                                                                      | + | TtoA | 0.1    | 0.1111 | 3  | 2  | [10,18]   |
| chr15:39555229  | RTF1    | coding_exon | ENST00000389628:TtoA;ENST00000389629:TtoA;                                           | + | AtoG | 0.1538 | 0.1875 | 5  | 3  | [13,16]   |
| chr15:39561772  | RTF1    | UTR3        |                                                                                      | + | AtoG | 0.1    | 0.1667 | 9  | 3  | [10,36]   |
| chr15:39562005  | RTF1    | UTR3        |                                                                                      | + | TtoC | 0.1538 | 0.1818 | 2  | 2  | [11,13]   |
| chr15:39562303  | RTF1    | UTR3        |                                                                                      | + | TtoC | 0.1    | 0.1111 | 3  | 2  | [10,10]   |
| chr2:55052858   | RTN4    | UTR3        |                                                                                      | - | AtoG | 0.1    | 0.1    | 6  | 2  | [10,20]   |
| chr2:55053068   | RTN4    | UTR3        |                                                                                      | - | TtoA | 0.1143 | 0.2558 | 10 | 4  | [22,50]   |
| chr18:65849150  | RTTN    | mixed       |                                                                                      | - | AtoG | 0.1    | 0.1    | 2  | 2  | [10,10]   |
| chr5:178922212  | RUFY1   | coding_exon | ENST00000319449:EtoD;ENST00000360569:EtoD;ENST00000377001:EtoD;ENST00000377001:EtoD; | + | GtoT | 0.1    | 0.1    | 2  | 2  | [10,10]   |
| chr4:17869427   | RUFY3   | coding_exon | ENST00000226328:RtoS;ENST00000381006:RtoS;ENST00000417478:RtoS;                      | + | AtoT | 0.1    | 0.1    | 3  | 2  | [10,10]   |
| chr17:38398758  | RUND1   | UTR3        |                                                                                      | + | AtoG | 0.1    | 0.1    | 3  | 2  | [10,10]   |
| chr1:25101550   | RUNX3   | coding_exon | ENST00000308873:TtoP;ENST00000338888:TtoP;ENST00000399916:TtoP;ENST00000399916:TtoP; | - | AtoC | 0.12   | 0.1325 | 2  | 2  | [50,83]   |
| chr1:25098688   | RUNX3   | UTR3        |                                                                                      | - | AtoG | 0.1    | 0.1905 | 4  | 3  | [21,34]   |
| chr21:29300679  | RWDD2B  | coding_exon | ENST00000493196:LtoH;                                                                | - | TtoA | 0.1    | 0.1    | 2  | 2  | [10,10]   |
| chr21:29300060  | RWDD2B  | UTR3        |                                                                                      | - | GtoA | 0.1176 | 0.25   | 2  | 2  | [12,17]   |
| chr6:33271217   | RXRB    | coding_exon | ENST00000374685:LtoV;                                                                | - | CtoG | 0.1    | 0.1818 | 3  | 2  | [10,11]   |

|                 |          |             |                                                                                      |   |      |        |        |    |   |         |
|-----------------|----------|-------------|--------------------------------------------------------------------------------------|---|------|--------|--------|----|---|---------|
| chr6:33272189   | RXRB     | coding_exon | ENST00000374680:StoR;ENST00000374683:StoR;ENST00000374685:StoR;                      | - | CtoG | 0.1818 | 0.2143 | 2  | 2 | [11,14] |
| chr3:72507252   | RYBP     | mixed       |                                                                                      | - | TtoA | 0.1    | 0.1    | 2  | 2 | [10,10] |
| chr3:72578347   | RYBP     | mixed       |                                                                                      | - | AtoG | 0.1    | 0.1053 | 4  | 2 | [10,19] |
| chr3:135377154  | RYK      | mixed       |                                                                                      | - | GtoA | 0.1    | 0.1667 | 4  | 2 | [10,12] |
| chr3:135377161  | RYK      | mixed       |                                                                                      | - | CtoT | 0.1    | 0.1538 | 3  | 2 | [10,13] |
| chr3:135377199  | RYK      | mixed       |                                                                                      | - | CtoT | 0.1    | 0.2    | 3  | 2 | [10,10] |
| chr3:135377503  | RYK      | mixed       |                                                                                      | - | GtoC | 0.1538 | 0.3    | 4  | 2 | [10,13] |
| chr3:135377562  | RYK      | mixed       |                                                                                      | - | GtoA | 0.1    | 0.2308 | 6  | 4 | [10,14] |
| chr1:151865532  | S100A13  | coding_exon | ENST00000339556:Etov;ENST00000368699:Etov;ENST00000392622:Etov;ENST00000392622:Etov; | - | AtoT | 0.1    | 0.1    | 3  | 2 | [10,10] |
| chr1:151773732  | S100A6   | UTR3        |                                                                                      | - | TtoA | 0.1429 | 0.1786 | 4  | 3 | [14,30] |
| chr1:151773736  | S100A6   | UTR3        |                                                                                      | - | TtoC | 0.1    | 0.1111 | 5  | 2 | [10,18] |
| chr1:33094594   | S100PBP  | UTR3        |                                                                                      | + | AtoG | 0.1    | 0.1538 | 3  | 2 | [10,13] |
| chr1:33095858   | S100PBP  | UTR3        |                                                                                      | + | AtoG | 0.1111 | 0.1667 | 5  | 2 | [12,18] |
| chr1:33096420   | S100PBP  | UTR3        |                                                                                      | + | TtoA | 0.1    | 0.1053 | 4  | 2 | [10,20] |
| chr1:33096584   | S100PBP  | UTR3        |                                                                                      | + | TtoA | 0.1    | 0.1667 | 2  | 2 | [10,12] |
| chr1:101479127  | S1PR1    | mixed       |                                                                                      | + | AtoC | 0.1    | 0.1053 | 4  | 2 | [11,19] |
| chr19:10196386  | S1PR2    | coding_exon | ENST00000317726:StoP;                                                                | - | TtoC | 0.1    | 0.1111 | 6  | 2 | [10,18] |
| chr11:18061854  | SAAL1    | coding_exon | ENST00000300013:VtoE;                                                                | - | TtoA | 0.1429 | 0.2    | 4  | 2 | [14,15] |
| chr19:5551233   | SAFB2    | mixed       |                                                                                      | - | AtoG | 0.1    | 0.1579 | 3  | 2 | [19,20] |
| chr19:44552461  | SAMD4B   | coding_exon | ENST00000314471:WtoR;ENST00000392067:WtoR;ENST00000429637:WtoR;                      | + | TtoC | 0.1333 | 0.1667 | 2  | 2 | [12,15] |
| chr19:44558285  | SAMD4B   | coding_exon | ENST00000314471:StoC;ENST00000392067:StoC;ENST00000429637:StoC;                      | + | AtoT | 0.1    | 0.1    | 3  | 2 | [10,10] |
| chr19:44566972  | SAMD4B   | UTR3        |                                                                                      | + | TtoA | 0.1333 | 0.2    | 9  | 2 | [11,15] |
| chr7:92599575   | SAMD9L   | coding_exon |                                                                                      | - | TtoG | 0.1    | 0.1429 | 2  | 2 | [11,15] |
| chr7:92600325   | SAMD9L   | coding_exon |                                                                                      | - | AtoG | 0.1    | 0.1    | 2  | 2 | [10,10] |
| chr7:92614371   | SAMD9L   | mixed       |                                                                                      | - | TtoG | 0.1818 | 0.2667 | 2  | 2 | [11,15] |
| chr22:42723719  | SAMM50   | UTR3        |                                                                                      | + | TtoC | 0.1143 | 0.129  | 7  | 2 | [31,35] |
| chr2:128484371  | SAP130   | mixed       |                                                                                      | - | AtoT | 0.1    | 0.1    | 3  | 2 | [10,10] |
| chr2:128484410  | SAP130   | mixed       |                                                                                      | - | GtoC | 0.1    | 0.1    | 2  | 2 | [10,10] |
| chr4:174531208  | SAP30    | coding_exon |                                                                                      | + | TtoG | 0.1053 | 0.1111 | 2  | 2 | [18,19] |
| chr11:68138735  | SAP53    | mixed       |                                                                                      | + | TtoC | 0.1    | 0.1    | 3  | 2 | [10,10] |
| chr10:71587625  | SAR1A    | mixed       |                                                                                      | - | TtoC | 0.1    | 0.1212 | 8  | 3 | [33,41] |
| chr5:133970241  | SAR1B    | UTR3        |                                                                                      | - | TtoA | 0.1    | 0.1    | 6  | 2 | [10,10] |
| chr17:23732349  | SARM1    | coding_exon | ENST00000457710:RtoG;                                                                | + | AtoG | 0.1    | 0.1    | 5  | 2 | [10,10] |
| chr17:23712397  | SARM1    | coding_exon |                                                                                      | + | TtoG | 0.1    | 0.1154 | 5  | 2 | [10,26] |
| chr17:23712406  | SARM1    | coding_exon |                                                                                      | + | TtoC | 0.1053 | 0.125  | 6  | 3 | [16,19] |
| chr17:23749308  | SARM1    | UTR3        |                                                                                      | + | GtoA | 0.1    | 0.1818 | 2  | 2 | [10,22] |
| chr12:54437413  | SARNP    | UTR3        |                                                                                      | - | AtoG | 0.1429 | 0.1579 | 7  | 2 | [19,21] |
| chr1:109582267  | SAR5     | UTR3        |                                                                                      | + | TtoA | 0.1    | 0.1111 | 9  | 2 | [10,18] |
| chr11:65503086  | SART1    | UTR3        |                                                                                      | + | TtoC | 0.1053 | 0.1818 | 2  | 2 | [11,19] |
| chr12:107440630 | SART3    | UTR3        |                                                                                      | - | TtoC | 0.1    | 0.2308 | 9  | 5 | [13,31] |
| chr1:100322132  | SASS6    | UTR3        |                                                                                      | - | AtoT | 0.1    | 0.1    | 2  | 2 | [10,10] |
| chr17:7470988   | SAT2     | coding_exon | ENST00000269298:RtoL;ENST00000380466:RtoL;                                           | - | GtoT | 0.1429 | 0.1667 | 8  | 2 | [12,21] |
| chr17:7470833   | SAT2     | coding_exon | ENST00000269298:QtoP;ENST00000380466:QtoP;                                           | - | AtoC | 0.1176 | 0.125  | 3  | 2 | [16,17] |
| chr12:122374283 | SBNO1    | coding_exon |                                                                                      | - | GtoA | 0.1    | 0.1923 | 8  | 3 | [10,26] |
| chr12:122380955 | SBNO1    | coding_exon |                                                                                      | - | TtoC | 0.1    | 0.1    | 2  | 2 | [10,10] |
| chr4:166478499  | SC4MOL   | mixed       |                                                                                      | + | TtoA | 0.1    | 0.1    | 4  | 2 | [10,10] |
| chr11:120683711 | SC50L    | UTR3        |                                                                                      | + | AtoG | 0.1111 | 0.2    | 3  | 2 | [10,18] |
| chr15:72923597  | SCAMP2   | UTR3        |                                                                                      | - | TtoC | 0.1111 | 0.1818 | 3  | 3 | [11,27] |
| chr19:1868815   | SCAMP4   | coding_exon | ENST00000316097:WtoG;ENST00000409472:WtoG;                                           | + | TtoG | 0.1    | 0.3571 | 2  | 2 | [10,14] |
| chr20:34004962  | SCAND1   | mixed       |                                                                                      | - | GtoA | 0.1    | 0.3333 | 2  | 2 | [10,27] |
| chr20:34004964  | SCAND1   | mixed       |                                                                                      | - | GtoA | 0.2    | 0.2667 | 3  | 2 | [10,15] |
| chr15:74808127  | SCAPER   | coding_exon | ENST00000324767:KtoE;                                                                | - | AtoG | 0.1    | 0.1176 | 3  | 3 | [10,20] |
| chr4:77299169   | SCARB2   | UTR3        |                                                                                      | - | TtoA | 0.1    | 0.1    | 2  | 2 | [10,10] |
| chr4:83770861   | SCD5     | UTR3        |                                                                                      | - | CtoT | 0.8182 | 0.9048 | 2  | 2 | [12,21] |
| chr4:83770862   | SCD5     | UTR3        |                                                                                      | - | CtoA | 0.7143 | 0.9667 | 3  | 3 | [14,30] |
| chr4:30274668   | SCFD1    | UTR3        |                                                                                      | + | TtoA | 0.1667 | 0.25   | 9  | 2 | [12,12] |
| chr2:238672027  | SCLY     | UTR3        |                                                                                      | + | GtoA | 0.1429 | 0.2222 | 3  | 2 | [14,18] |
| chr1:41265988   | SCMH1    | UTR3        |                                                                                      | - | TtoC | 0.1    | 0.1    | 2  | 2 | [10,10] |
| chr17:10524865  | SCO1     | UTR3        |                                                                                      | - | AtoC | 0.1    | 0.2059 | 3  | 2 | [10,34] |
| chr1:53289233   | SCP2     | UTR3        |                                                                                      | + | TtoA | 0.1    | 0.1538 | 3  | 2 | [10,13] |
| chr17:52429335  | SCPEP1   | coding_exon | ENST00000262288:VtoE;ENST00000393142:VtoE;                                           | + | TtoA | 0.1053 | 0.1111 | 8  | 2 | [18,19] |
| chr17:52438738  | SCPEP1   | UTR3        |                                                                                      | + | TtoA | 0.1    | 0.1538 | 7  | 3 | [13,20] |
| chr17:52438760  | SCPEP1   | coding_exon |                                                                                      | + | AtoG | 0.1429 | 0.2    | 2  | 2 | [10,14] |
| chr8:144946904  | SCRIB    | coding_exon | ENST00000320476:VtoG;ENST00000356994:VtoG;ENST00000377533:VtoG;ENST00000377533:VtoG; | - | TtoG | 0.1    | 0.1053 | 2  | 2 | [10,19] |
| chr8:144945463  | SCRIB    | coding_exon | ENST00000320476:PtoL;ENST00000356994:PtoL;ENST00000377533:PtoL;ENST00000377533:PtoL; | - | CtoT | 0.5233 | 0.5816 | 2  | 2 | [86,98] |
| chr7:29926423   | SCRN1    | UTR3        |                                                                                      | - | AtoG | 0.1333 | 0.2222 | 3  | 2 | [15,19] |
| chr17:43270472  | SCRN2    | mixed       |                                                                                      | - | GtoA | 0.1    | 0.1176 | 2  | 2 | [10,17] |
| chr11:65054753  | SCYL1    | coding_exon |                                                                                      | + | TtoC | 0.1    | 0.1    | 2  | 2 | [10,10] |
| chr12:99253752  | SCYL2    | coding_exon |                                                                                      | + | AtoG | 0.1111 | 0.1538 | 5  | 2 | [13,18] |
| chr4:77110515   | SDAD1    | coding_exon | ENST00000356260:StoL;ENST00000395710:StoL;ENST00000395711:StoL;                      | - | CtoT | 0.1    | 0.1667 | 6  | 4 | [17,30] |
| chr4:77101207   | SDAD1    | coding_exon | ENST00000356260:RtoW;ENST00000395710:RtoW;ENST00000395711:RtoW;                      | - | CtoT | 0.1111 | 0.2105 | 7  | 3 | [17,27] |
| chr4:77097566   | SDAD1    | coding_exon | ENST00000356260:RtoP;ENST00000395710:RtoP;ENST00000395711:RtoP;                      | - | GtoC | 0.1053 | 0.2308 | 13 | 4 | [13,19] |
| chr4:77105948   | SDAD1    | coding_exon | ENST00000356260:PtoH;ENST00000395710:PtoH;ENST00000395711:PtoH;                      | - | CtoA | 0.12   | 0.1429 | 6  | 2 | [21,25] |
| chr4:77100260   | SDAD1    | coding_exon | ENST00000356260:NtoS;ENST00000395710:NtoS;ENST00000395711:NtoS;                      | - | AtoG | 0.1034 | 0.1875 | 11 | 4 | [14,29] |
| chr4:77101479   | SDAD1    | coding_exon | ENST00000356260:NtoK;ENST00000395710:NtoK;ENST00000395711:NtoK;                      | - | TtoA | 0.1    | 0.1    | 3  | 2 | [10,10] |
| chr4:77101389   | SDAD1    | coding_exon | ENST00000356260:KtoN;ENST00000395710:KtoN;ENST00000395711:KtoN;                      | - | GtoT | 0.1    | 0.15   | 6  | 3 | [10,20] |
| chr4:77110510   | SDAD1    | coding_exon | ENST00000356260:ItoV;ENST00000395710:ItoV;ENST00000395711:ItoV;                      | - | AtoG | 0.1905 | 0.2    | 6  | 2 | [15,21] |
| chr4:77101251   | SDAD1    | coding_exon | ENST00000356260:HtoR;ENST00000395710:HtoR;ENST00000395711:HtoR;                      | - | AtoG | 0.1053 | 0.1429 | 6  | 3 | [14,19] |
| chr4:77101250   | SDAD1    | coding_exon | ENST00000356260:HtoQ;ENST00000395710:HtoQ;ENST00000395711:HtoQ;                      | - | CtoG | 0.1111 | 0.1176 | 7  | 2 | [17,18] |
| chr4:77098044   | SDAD1    | coding_exon | ENST00000356260:DtoN;ENST00000395710:DtoN;ENST00000395711:DtoN;                      | - | GtoA | 0.1    | 0.1    | 4  | 2 | [10,20] |
| chr4:77100305   | SDAD1    | coding_exon | ENST00000356260:DtoG;ENST00000395710:DtoG;ENST00000395711:DtoG;                      | - | AtoG | 0.1    | 0.2727 | 7  | 6 | [10,22] |
| chr4:77100265   | SDAD1    | coding_exon |                                                                                      | - | AtoG | 0.1304 | 0.2    | 12 | 4 | [15,23] |
| chr4:77100355   | SDAD1    | coding_exon |                                                                                      | - | GtoA | 0.1111 | 0.2    | 9  | 4 | [10,18] |
| chr4:77109569   | SDAD1    | coding_exon |                                                                                      | - | GtoA | 0.1    | 0.2    | 8  | 4 | [10,15] |
| chr4:77113536   | SDAD1    | coding_exon |                                                                                      | - | GtoA | 0.1    | 0.1818 | 4  | 2 | [10,11] |
| chr4:77115950   | SDAD1    | coding_exon |                                                                                      | - | AtoT | 0.1    | 0.1818 | 4  | 2 | [10,11] |
| chr4:77090877   | SDAD1    | UTR3        |                                                                                      | - | GtoA | 0.1333 | 0.2    | 6  | 2 | [15,15] |
| chr8:59651158   | SDCBP    | coding_exon | ENST00000260130:LtoR;ENST00000413219:LtoR;ENST00000422546:LtoR;ENST00000422546:LtoR; | + | TtoG | 0.1    | 0.1154 | 4  | 2 | [10,26] |
| chr5:64349990   | SDCCAG10 | UTR3        |                                                                                      | + | GtoA | 0.1667 | 0.1667 | 2  | 2 | [12,12] |
| chr9:138420251  | SDCCAG3  | coding_exon | ENST00000298537:LtoV;ENST00000357365:LtoV;ENST00000371722:LtoV;ENST00000371722:LtoV; | - | CtoG | 0.1429 | 0.3077 | 9  | 4 | [12,18] |
| chr9:138422142  | SDCCAG3  | coding_exon | ENST00000298537:LtoP;ENST00000357365:LtoP;ENST00000371722:LtoP;ENST00000371722:LtoP; | - | TtoC | 0.1053 | 0.1304 | 7  | 2 | [19,23] |
| chr1:241534687  | SDCCAG8  | coding_exon | ENST00000343783:QtoR;ENST00000355875:QtoR;ENST00000366541:QtoR;ENST00000366541:QtoR; | + | AtoG | 0.1    | 0.1    | 2  | 2 | [10,10] |
| chr1:241504500  | SDCCAG8  | coding_exon |                                                                                      | + | TtoA | 0.1    | 0.1    | 2  | 2 | [10,10] |
| chr17:23999991  | SDF2     | UTR3        |                                                                                      | - | TtoG | 0.1111 | 0.2    | 12 | 7 | [14,30] |
| chr1:159598931  | SDHC     | mixed       |                                                                                      | + | GtoC | 0.5116 | 0.6364 | 2  | 2 | [33,45] |
| chr1:159599463  | SDHC     | UTR3        |                                                                                      | + | GtoA | 0.1064 | 0.129  | 4  | 2 | [31,47] |

|                 |         |             |                                                                         |   |      |        |        |    |    |          |
|-----------------|---------|-------------|-------------------------------------------------------------------------|---|------|--------|--------|----|----|----------|
| chr1:159599464  | SDHC    | UTR3        |                                                                         | + | AtoG | 0.125  | 0.1364 | 5  | 2  | [32,44]  |
| chr15:83013828  | SEC11B  | UTR3        |                                                                         | - | TtoC | 0.1    | 0.2105 | 10 | 3  | [12,22]  |
| chr17:72721729  | SEC14L1 | mixed       |                                                                         | + | AtoG | 0.1    | 0.1053 | 2  | 2  | [10,19]  |
| chr17:72722428  | SEC14L1 | mixed       |                                                                         | + | AtoG | 0.1    | 0.1333 | 6  | 3  | [10,20]  |
| chr17:72722451  | SEC14L1 | mixed       |                                                                         | + | TtoC | 0.125  | 0.125  | 2  | 2  | [16,17]  |
| chr17:72723138  | SEC14L1 | mixed       |                                                                         | + | CtoA | 0.4571 | 0.5221 | 2  | 2  | [70,113] |
| chr9:138486320  | SEC16A  | mixed       |                                                                         | - | AtoG | 0.1    | 0.1053 | 2  | 2  | [10,19]  |
| chr9:138488805  | SEC16A  | mixed       |                                                                         | - | AtoG | 0.1    | 0.1111 | 2  | 2  | [10,10]  |
| chr9:138455418  | SEC16A  | UTR3        |                                                                         | - | AtoG | 0.1    | 0.4167 | 16 | 12 | [18,45]  |
| chr9:138455444  | SEC16A  | UTR3        |                                                                         | - | AtoG | 0.1    | 0.3    | 9  | 6  | [10,56]  |
| chr9:138455703  | SEC16A  | UTR3        |                                                                         | - | AtoG | 0.1    | 0.5333 | 14 | 12 | [15,35]  |
| chr9:138455787  | SEC16A  | UTR3        |                                                                         | - | AtoG | 0.1667 | 0.1765 | 3  | 2  | [12,17]  |
| chr9:138455876  | SEC16A  | UTR3        |                                                                         | - | AtoG | 0.1333 | 0.1364 | 4  | 2  | [15,22]  |
| chr3:42564887   | SEC22C  | UTR3        |                                                                         | - | AtoG | 0.1    | 0.1    | 2  | 2  | [10,11]  |
| chr14:38572269  | SEC23A  | coding_exon |                                                                         | - | TtoA | 0.1429 | 0.1538 | 5  | 2  | [13,14]  |
| chr20:18461350  | SEC23B  | coding_exon | ENST00000262544:VtoI;ENST00000336714:VtoI;ENST00000377465:VtoI;ENST0000 | + | GtoA | 0.4103 | 0.5    | 2  | 2  | [12,118] |
| chr10:121682611 | SEC23IP | coding_exon | ENST00000369075:KtoE;                                                   | + | AtoG | 0.1    | 0.1538 | 2  | 2  | [10,13]  |
| chr5:134061637  | SEC24A  | coding_exon | ENST00000398844:CtoR;                                                   | + | TtoC | 0.1    | 0.1579 | 5  | 2  | [10,19]  |
| chr5:134084670  | SEC24A  | coding_exon |                                                                         | + | AtoC | 0.1    | 0.1429 | 4  | 2  | [10,14]  |
| chr10:75200209  | SEC24C  | mixed       |                                                                         | + | TtoC | 0.1111 | 0.1176 | 2  | 2  | [10,17]  |
| chr4:119864125  | SEC24D  | mixed       |                                                                         | - | TtoA | 0.1176 | 0.1333 | 6  | 2  | [15,17]  |
| chr4:83967590   | SEC31A  | coding_exon | ENST00000264405:NtoD;ENST00000311785:NtoD;ENST00000348405:NtoD;ENST0    | - | AtoG | 0.1    | 0.1148 | 12 | 2  | [61,61]  |
| chr4:83967678   | SEC31A  | coding_exon |                                                                         | - | AtoC | 0.1129 | 0.1698 | 5  | 4  | [51,62]  |
| chr4:84003546   | SEC31A  | mixed       |                                                                         | - | TtoA | 0.125  | 0.1667 | 3  | 2  | [13,16]  |
| chr10:102239485 | SEC31B  | coding_exon | ENST00000370345:AtoS;                                                   | - | GtoT | 0.1    | 0.1    | 2  | 2  | [10,10]  |
| chr10:102236764 | SEC31B  | UTR3        |                                                                         | - | TtoC | 0.1    | 0.1429 | 2  | 2  | [10,14]  |
| chr3:129254409  | SEC61A1 | mixed       |                                                                         | + | CtoT | 0.125  | 0.1304 | 2  | 2  | [17,23]  |
| chr3:129271279  | SEC61A1 | UTR3        |                                                                         | + | AtoG | 0.1111 | 0.1143 | 7  | 2  | [27,35]  |
| chr10:12246320  | SEC61A2 | coding_exon | ENST00000298428:LtoR;ENST00000379020:LtoR;ENST00000379033:LtoR;         | + | TtoG | 0.1    | 0.1    | 2  | 2  | [10,10]  |
| chr10:12249578  | SEC61A2 | coding_exon |                                                                         | + | AtoT | 0.3    | 0.6    | 3  | 3  | [10,11]  |
| chr9:101032694  | SEC61B  | UTR3        |                                                                         | + | TtoA | 0.1111 | 0.1111 | 2  | 2  | [10,10]  |
| chr9:101032659  | SEC61B  | UTR3        |                                                                         | + | AtoG | 0.1053 | 0.3    | 2  | 2  | [10,20]  |
| chr7:54787499   | SEC61G  | UTR3        |                                                                         | - | GtoT | 0.1304 | 0.3    | 3  | 2  | [10,23]  |
| chr3:171176184  | SEC62   | coding_exon | ENST00000337002:VtoD;ENST00000480708:VtoD;                              | + | TtoA | 0.1    | 0.1351 | 11 | 2  | [40,41]  |
| chr3:171188810  | SEC62   | coding_exon | ENST00000337002:CtoW;ENST00000480708:CtoW;                              | + | TtoG | 0.1053 | 0.1071 | 2  | 2  | [19,28]  |
| chr3:171193691  | SEC62   | UTR3        |                                                                         | + | TtoC | 0.1    | 0.2    | 7  | 4  | [10,17]  |
| chr6:108321458  | SEC63   | coding_exon | ENST00000369002:Lto*;                                                   | - | TtoA | 0.1    | 0.1    | 2  | 2  | [10,10]  |
| chr6:108298846  | SEC63   | UTR3        |                                                                         | - | TtoC | 0.1    | 0.1538 | 5  | 2  | [10,26]  |
| chr6:108299387  | SEC63   | UTR3        |                                                                         | - | TtoG | 0.1    | 0.1    | 4  | 2  | [10,10]  |
| chr18:12977017  | SEH1L   | mixed       |                                                                         | + | TtoC | 0.1    | 0.1429 | 2  | 2  | [10,14]  |
| chr18:12977399  | SEH1L   | UTR3        |                                                                         | + | TtoG | 0.1    | 0.1    | 3  | 2  | [10,10]  |
| chr14:81042186  | SEL1L   | coding_exon | ENST00000336735:WtoR;                                                   | - | TtoC | 0.1    | 0.1818 | 4  | 3  | [10,19]  |
| chr14:81009716  | SEL1L   | UTR3        |                                                                         | - | TtoA | 0.1    | 0.2    | 5  | 4  | [10,17]  |
| chr1:154413017  | SEMA4A  | coding_exon | ENST00000355014:FtoI;ENST00000368282:FtoI;ENST00000368283:FtoI;ENST0000 | + | TtoA | 0.1176 | 0.1304 | 2  | 2  | [18,23]  |
| chr2:96893831   | SEMA4C  | coding_exon |                                                                         | - | GtoC | 0.1    | 0.1818 | 3  | 2  | [10,11]  |
| chr9:91183884   | SEMA4D  | coding_exon | ENST00000343780:NtoS;ENST00000356444:NtoS;ENST00000422704:NtoS;ENST00   | - | AtoG | 0.1    | 0.1429 | 2  | 2  | [10,14]  |
| chr9:91183080   | SEMA4D  | mixed       |                                                                         | - | TtoG | 0.1    | 0.1053 | 8  | 2  | [10,19]  |
| chr9:91183086   | SEMA4D  | mixed       |                                                                         | - | TtoC | 0.1    | 0.1364 | 5  | 2  | [10,24]  |
| chr12:46723944  | SENP1   | UTR3        |                                                                         | - | TtoC | 0.1    | 0.1    | 2  | 2  | [10,10]  |
| chr12:46724158  | SENP1   | UTR3        |                                                                         | - | TtoC | 0.1    | 0.1    | 2  | 2  | [10,10]  |
| chr3:186812133  | SENP2   | coding_exon |                                                                         | + | TtoC | 0.1    | 0.1    | 2  | 2  | [10,10]  |
| chr3:186830879  | SENP2   | UTR3        |                                                                         | + | TtoC | 0.1    | 0.1111 | 3  | 2  | [10,27]  |
| chr3:186831068  | SENP2   | UTR3        |                                                                         | + | TtoC | 0.1    | 0.1    | 3  | 2  | [10,10]  |
| chr3:186831165  | SENP2   | UTR3        |                                                                         | + | TtoA | 0.125  | 0.1429 | 6  | 2  | [14,17]  |
| chr3:198143489  | SENP5   | UTR3        |                                                                         | + | TtoA | 0.1    | 0.1    | 2  | 2  | [10,10]  |
| chr4:78152073   | SEPT11  | coding_exon | ENST00000264893:VtoA;                                                   | + | TtoC | 0.1    | 0.1471 | 6  | 2  | [20,34]  |
| chr4:78160765   | SEPT11  | coding_exon | ENST00000264893:TtoP;                                                   | + | AtoC | 0.1    | 0.1429 | 7  | 2  | [14,40]  |
| chr4:78174717   | SEPT11  | UTR3        |                                                                         | + | AtoG | 0.1154 | 0.1864 | 8  | 3  | [38,59]  |
| chr4:78174749   | SEPT11  | UTR3        |                                                                         | + | TtoC | 0.1    | 0.1429 | 4  | 2  | [14,30]  |
| chr4:78176072   | SEPT11  | UTR3        |                                                                         | + | TtoC | 0.1034 | 0.1429 | 7  | 2  | [14,29]  |
| chr4:78176438   | SEPT11  | UTR3        |                                                                         | + | AtoG | 0.1    | 0.2    | 11 | 5  | [10,18]  |
| chr4:78176494   | SEPT11  | UTR3        |                                                                         | + | GtoT | 0.1    | 0.1    | 3  | 2  | [10,20]  |
| chr4:78178391   | SEPT11  | UTR3        |                                                                         | + | TtoA | 0.1    | 0.1053 | 4  | 2  | [11,20]  |
| chr2:241940596  | SEPT2   | UTR3        |                                                                         | + | TtoC | 0.125  | 0.1429 | 6  | 2  | [14,24]  |
| chr7:35807406   | SEPT7   | mixed       |                                                                         | + | GtoC | 1      | 1      | 4  | 4  | [15,23]  |
| chr5:132120562  | SEPT8   | mixed       |                                                                         | - | TtoC | 0.1    | 0.1    | 4  | 2  | [10,10]  |
| chr17:73008263  | SEPT9   | UTR3        |                                                                         | + | GtoA | 0.1    | 0.1111 | 9  | 2  | [10,18]  |
| chr16:1928445   | SEPX1   | UTR3        |                                                                         | - | TtoG | 0.1111 | 0.1538 | 5  | 3  | [18,27]  |
| chr15:41874100  | SERF2   | coding_exon |                                                                         | + | AtoG | 0.1    | 0.2727 | 2  | 2  | [10,11]  |
| chr15:41873538  | SERF2   | mixed       |                                                                         | + | TtoA | 0.1111 | 0.1875 | 3  | 3  | [10,16]  |
| chr15:41873539  | SERF2   | mixed       |                                                                         | + | TtoA | 0.1    | 0.2143 | 2  | 2  | [10,14]  |
| chr11:17966785  | SERGEF  | coding_exon | ENST00000265965:HtoR;                                                   | - | AtoG | 0.1667 | 0.2    | 5  | 2  | [10,12]  |
| chr1:31678493   | SERINC2 | coding_exon | ENST00000373709:VtoE;ENST00000373710:VtoE;                              | + | TtoA | 0.1    | 0.1961 | 4  | 3  | [20,51]  |
| chr1:31680044   | SERINC2 | UTR3        |                                                                         | + | CtoG | 0.2308 | 0.4364 | 4  | 4  | [12,55]  |
| chr20:42560841  | SERINC3 | UTR3        |                                                                         | - | TtoC | 0.1    | 0.2667 | 2  | 2  | [15,20]  |
| chr3:151744247  | SERP1   | UTR3        |                                                                         | - | CtoT | 0.1364 | 0.1667 | 7  | 2  | [12,22]  |
| chr3:151744258  | SERP1   | UTR3        |                                                                         | - | TtoA | 0.1176 | 0.2727 | 3  | 3  | [11,35]  |
| chr3:151744392  | SERP1   | UTR3        |                                                                         | - | TtoA | 0.1081 | 0.1379 | 5  | 3  | [22,37]  |
| chr3:151764816  | SERP1   | UTR5        |                                                                         | - | TtoC | 0.1111 | 0.25   | 14 | 7  | [16,27]  |
| chr3:151772449  | SERP1   | UTR5        |                                                                         | - | TtoC | 0.1026 | 0.12   | 3  | 2  | [25,39]  |
| chr3:151784481  | SERP1   | UTR5        |                                                                         | - | TtoC | 0.1053 | 0.1111 | 5  | 2  | [19,27]  |
| chr19:45620630  | SERTAD1 | coding_exon | ENST00000357949:LtoM;                                                   | - | CtoA | 0.1    | 0.1    | 2  | 2  | [10,10]  |
| chr2:64713895   | SERTAD2 | mixed       |                                                                         | - | CtoA | 0.1429 | 0.1818 | 2  | 2  | [11,14]  |
| chr2:64714901   | SERTAD2 | mixed       |                                                                         | - | TtoG | 0.1111 | 0.1538 | 6  | 2  | [13,18]  |
| chr19:45639352  | SERTAD3 | coding_exon | ENST00000322354:VtoG;ENST00000392028:VtoG;                              | - | TtoG | 0.1    | 0.1    | 4  | 2  | [10,10]  |
| chr1:28468296   | SES2N   | coding_exon | ENST00000253063:RtoW;                                                   | + | CtoT | 0.4545 | 0.5714 | 2  | 2  | [11,14]  |
| chr9:130493976  | SET     | coding_exon | ENST00000322030:StoR;ENST00000372686:StoR;ENST00000372688:StoR;ENST000  | + | TtoA | 0.1    | 0.2308 | 7  | 4  | [10,19]  |
| chr9:130495808  | SET     | coding_exon | ENST00000322030:StoI;ENST00000372686:StoI;ENST00000372688:StoI;ENST0000 | + | GtoT | 0.1818 | 0.2    | 6  | 2  | [11,15]  |
| chr9:130494020  | SET     | coding_exon | ENST00000322030:QtoR;ENST00000372686:QtoR;ENST00000372688:QtoR;ENST0    | + | AtoG | 0.125  | 0.25   | 8  | 4  | [14,28]  |
| chr9:130494007  | SET     | coding_exon | ENST00000322030:NtoH;ENST00000372686:NtoH;ENST00000372688:NtoH;ENST0    | + | AtoC | 0.1    | 0.1    | 3  | 2  | [10,10]  |
| chr9:130494014  | SET     | coding_exon | ENST00000322030:LtoP;ENST00000372686:LtoP;ENST00000372688:LtoP;ENST00   | + | TtoC | 0.3571 | 0.5    | 6  | 6  | [11,28]  |
| chr9:130493960  | SET     | coding_exon | ENST00000322030:LtoH;ENST00000372686:LtoH;ENST00000372688:LtoH;ENST00   | + | TtoA | 0.1053 | 0.25   | 3  | 3  | [20,21]  |
| chr9:130494055  | SET     | coding_exon | ENST00000322030:KtoE;ENST00000372686:KtoE;ENST00000372688:KtoE;ENST00   | + | AtoG | 0.125  | 0.125  | 9  | 2  | [16,49]  |
| chr9:130494830  | SET     | coding_exon | ENST00000322030:FtoI;ENST00000372686:FtoI;ENST00000372688:FtoI;ENST0000 | + | TtoA | 0.1034 | 0.1143 | 10 | 2  | [31,38]  |
| chr9:130494828  | SET     | coding_exon | ENST00000322030:EtoG;ENST00000372686:EtoG;ENST00000372688:EtoG;ENST0    | + | AtoG | 0.1176 | 0.1746 | 7  | 3  | [17,63]  |
| chr9:130494836  | SET     | coding_exon | ENST00000322030:DtoN;ENST00000372686:DtoN;ENST00000372688:DtoN;ENST0    | + | GtoA | 0.1667 | 0.4    | 3  | 3  | [10,12]  |

|                 |         |             |                                                                                                                                                     |   |      |        |        |    |    |           |
|-----------------|---------|-------------|-----------------------------------------------------------------------------------------------------------------------------------------------------|---|------|--------|--------|----|----|-----------|
| chr9:130493958  | SET     | coding_exon |                                                                                                                                                     | + | AtoG | 0.1212 | 0.1333 | 4  | 3  | [15,33]   |
| chr9:130493973  | SET     | coding_exon |                                                                                                                                                     | + | CtoG | 0.1    | 0.1379 | 7  | 2  | [10,29]   |
| chr9:130494024  | SET     | coding_exon |                                                                                                                                                     | + | AtoT | 0.1    | 0.1818 | 4  | 3  | [10,15]   |
| chr9:130494826  | SET     | coding_exon |                                                                                                                                                     | + | AtoG | 0.1008 | 0.1135 | 16 | 3  | [123,170] |
| chr9:130494835  | SET     | coding_exon |                                                                                                                                                     | + | AtoG | 0.1    | 0.1818 | 3  | 2  | [10,11]   |
| chr9:130495806  | SET     | coding_exon |                                                                                                                                                     | + | GtoA | 0.1    | 0.1538 | 6  | 3  | [11,17]   |
| chr9:130495809  | SET     | coding_exon |                                                                                                                                                     | + | CtoT | 0.1333 | 0.1429 | 3  | 2  | [14,15]   |
| chr3:47102786   | SETD2   | coding_exon | ENST00000409792:LtoP;ENST00000451092:LtoP;                                                                                                          | - | TtoC | 0.1    | 0.1    | 3  | 2  | [10,10]   |
| chr3:47104731   | SETD2   | coding_exon | ENST00000409792:EtoG;ENST00000451092:EtoG;                                                                                                          | - | AtoG | 0.1    | 0.1538 | 2  | 2  | [10,13]   |
| chr3:47133155   | SETD2   | coding_exon |                                                                                                                                                     | - | TtoC | 0.1    | 0.1    | 3  | 2  | [10,10]   |
| chr14:98940332  | SETD3   | coding_exon | ENST00000331768:VtoE;                                                                                                                               | - | TtoA | 0.1    | 0.2    | 4  | 2  | [10,15]   |
| chr14:99001881  | SETD3   | coding_exon |                                                                                                                                                     | - | TtoC | 0.1    | 0.1364 | 4  | 2  | [10,23]   |
| chr14:98934703  | SETD3   | UTR3        |                                                                                                                                                     | - | TtoG | 0.1    | 0.1176 | 6  | 2  | [10,34]   |
| chr3:9461810    | SETD5   | coding_exon | ENST00000302463:EtoD;ENST00000402198:EtoD;ENST00000402466:EtoD;ENST00000302463:DtoE;ENST00000402198:DtoE;ENST00000402466:DtoE;ENST00000302463:DtoE; | + | AtoC | 0.15   | 0.1667 | 2  | 2  | [12,20]   |
| chr3:9452419    | SETD5   | coding_exon | ENST00000302463:DtoE;ENST00000402198:DtoE;ENST00000402466:DtoE;ENST00000302463:DtoE;                                                                | + | TtoG | 0.1    | 0.1    | 2  | 2  | [10,10]   |
| chr3:9493173    | SETD5   | UTR3        |                                                                                                                                                     | + | GtoA | 0.1    | 0.1481 | 2  | 2  | [10,27]   |
| chr16:57109574  | SETD6   | mixed       |                                                                                                                                                     | + | CtoT | 0.1    | 0.1    | 2  | 2  | [10,10]   |
| chr1:149167073  | SETDB1  | coding_exon | ENST00000271640:RtoG;ENST00000368960:RtoG;ENST00000368962:RtoG;ENST00000271640:NtoT;ENST00000368969:NtoT;                                           | + | AtoG | 0.1    | 0.1    | 4  | 2  | [10,10]   |
| chr1:149186107  | SETDB1  | coding_exon | ENST00000271640:NtoT;ENST00000368969:NtoT;                                                                                                          | + | AtoC | 0.1    | 0.3529 | 2  | 2  | [10,17]   |
| chr1:149203504  | SETDB1  | UTR3        |                                                                                                                                                     | + | CtoT | 0.1034 | 0.5833 | 3  | 2  | [12,29]   |
| chr9:134191681  | SETX    | coding_exon | ENST00000224140:KtoE;ENST00000372169:KtoE;ENST00000393220:KtoE;                                                                                     | - | AtoG | 0.1    | 0.1111 | 2  | 2  | [10,18]   |
| chr9:134192354  | SETX    | coding_exon | ENST00000224140:EtoD;ENST00000372169:EtoD;ENST00000393220:EtoD;                                                                                     | - | GtoT | 0.1    | 0.1    | 2  | 2  | [10,10]   |
| chr9:134191892  | SETX    | coding_exon |                                                                                                                                                     | - | AtoC | 0.1    | 0.2    | 3  | 3  | [10,17]   |
| chr9:134127389  | SETX    | mixed       |                                                                                                                                                     | - | TtoA | 0.1    | 0.1176 | 3  | 2  | [10,17]   |
| chr9:134128238  | SETX    | mixed       |                                                                                                                                                     | - | GtoA | 0.1111 | 0.125  | 9  | 2  | [16,27]   |
| chr9:134128536  | SETX    | mixed       |                                                                                                                                                     | - | TtoC | 0.1429 | 0.1538 | 4  | 2  | [13,14]   |
| chr11:64288663  | SF1     | UTR3        |                                                                                                                                                     | - | GtoA | 0.1    | 0.1333 | 3  | 3  | [10,20]   |
| chr11:64289398  | SF1     | UTR3        |                                                                                                                                                     | - | TtoA | 0.125  | 0.1429 | 5  | 2  | [14,40]   |
| chr2:197965283  | SF3B1   | coding_exon | ENST00000335508:YtoN;                                                                                                                               | - | TtoA | 0.1071 | 0.3529 | 9  | 4  | [13,29]   |
| chr2:197965044  | SF3B1   | UTR3        |                                                                                                                                                     | - | GtoA | 0.1    | 0.1818 | 4  | 2  | [10,22]   |
| chr11:65583054  | SF3B2   | coding_exon | ENST00000322535:NtoD;                                                                                                                               | + | AtoG | 0.1029 | 0.1538 | 7  | 2  | [9,68]    |
| chr19:19268854  | SF4     | coding_exon | ENST00000247001:LtoP;                                                                                                                               | - | TtoC | 0.1053 | 0.1111 | 4  | 2  | [18,19]   |
| chr22:30311089  | SF11    | coding_exon | ENST00000400288:LtoQ;ENST00000400289:LtoQ;ENST00000414585:LtoQ;ENST00000400288:QtoR;                                                                | + | TtoA | 0.1    | 0.125  | 3  | 2  | [16,20]   |
| chr22:30344465  | SF11    | UTR3        |                                                                                                                                                     | + | AtoG | 0.1    | 0.25   | 2  | 2  | [10,12]   |
| chr10:7241336   | SFMBT2  | UTR3        |                                                                                                                                                     | - | AtoG | 0.1    | 0.1    | 2  | 2  | [10,10]   |
| chr10:7242216   | SFMBT2  | UTR3        |                                                                                                                                                     | - | TtoG | 0.1    | 0.1    | 3  | 2  | [10,10]   |
| chr10:7242269   | SFMBT2  | UTR3        |                                                                                                                                                     | - | TtoC | 0.1429 | 0.1667 | 2  | 2  | [12,14]   |
| chr10:7243962   | SFMBT2  | UTR3        |                                                                                                                                                     | - | AtoC | 0.1    | 0.1    | 2  | 2  | [10,10]   |
| chr1:35414580   | SFPQ    | mixed       |                                                                                                                                                     | - | AtoG | 0.1525 | 0.3571 | 3  | 3  | [12,65]   |
| chr1:35416221   | SFPQ    | mixed       |                                                                                                                                                     | - | AtoG | 0.1    | 0.25   | 2  | 2  | [10,12]   |
| chr1:35416796   | SFPQ    | mixed       |                                                                                                                                                     | - | GtoT | 0.1    | 0.1    | 2  | 2  | [10,10]   |
| chr1:35417582   | SFPQ    | mixed       |                                                                                                                                                     | - | TtoC | 0.1    | 0.2    | 8  | 2  | [10,11]   |
| chr1:35422397   | SFPQ    | UTR3        |                                                                                                                                                     | - | AtoT | 0.1111 | 0.1579 | 7  | 3  | [25,77]   |
| chr1:35422398   | SFPQ    | UTR3        |                                                                                                                                                     | - | TtoC | 0.1029 | 0.1507 | 4  | 3  | [29,73]   |
| chr17:53436363  | SFRS1   | UTR3        |                                                                                                                                                     | - | AtoT | 0.1143 | 0.1304 | 3  | 2  | [35,116]  |
| chr5:65511360   | SFRS12  | UTR3        |                                                                                                                                                     | + | TtoC | 0.1    | 0.3077 | 7  | 4  | [10,15]   |
| chr5:65512148   | SFRS12  | UTR3        |                                                                                                                                                     | + | CtoA | 0.1    | 0.1333 | 2  | 2  | [10,15]   |
| chr19:18997211  | SFRS14  | coding_exon | ENST00000330854:FtoV;ENST00000337018:FtoV;ENST00000392342:FtoV;ENST00000330854:QtoR;                                                                | - | TtoG | 0.1111 | 0.25   | 3  | 2  | [10,12]   |
| chr19:18964881  | SFRS14  | UTR3        |                                                                                                                                                     | - | TtoG | 0.1    | 0.1    | 2  | 2  | [10,10]   |
| chr19:18965446  | SFRS14  | UTR3        |                                                                                                                                                     | - | GtoT | 0.1111 | 0.1667 | 6  | 2  | [13,18]   |
| chr21:31995967  | SFRS15  | coding_exon | ENST00000286835:GtoV;ENST00000399804:GtoV;ENST00000419806:GtoV;ENST00000286835:QtoR;                                                                | - | GtoT | 0.1    | 0.1    | 2  | 2  | [10,11]   |
| chr21:31995179  | SFRS15  | coding_exon |                                                                                                                                                     | - | GtoA | 0.125  | 0.1667 | 7  | 2  | [12,16]   |
| chr21:32000515  | SFRS15  | coding_exon |                                                                                                                                                     | - | TtoC | 0.1333 | 0.1579 | 2  | 2  | [15,19]   |
| chr6:99955144   | SFRS18  | coding_exon | ENST00000369239:Sto*;ENST00000438806:Sto*;                                                                                                          | - | CtoA | 0.1    | 0.3636 | 9  | 4  | [10,17]   |
| chr6:99955140   | SFRS18  | coding_exon |                                                                                                                                                     | - | GtoA | 0.12   | 0.4    | 4  | 4  | [10,47]   |
| chr6:99954772   | SFRS18  | UTR3        |                                                                                                                                                     | - | AtoG | 0.1053 | 0.1667 | 8  | 4  | [13,19]   |
| chr17:72242735  | SFRS2   | UTR3        |                                                                                                                                                     | - | TtoG | 0.1071 | 0.1154 | 7  | 2  | [26,28]   |
| chr17:72242736  | SFRS2   | UTR3        |                                                                                                                                                     | - | TtoC | 0.1042 | 0.1154 | 12 | 2  | [27,48]   |
| chr17:72242747  | SFRS2   | UTR3        |                                                                                                                                                     | - | TtoA | 0.1154 | 0.2    | 16 | 6  | [21,84]   |
| chr17:72243448  | SFRS2   | UTR3        |                                                                                                                                                     | - | GtoA | 0.1053 | 0.375  | 13 | 5  | [15,32]   |
| chr11:94441462  | SFRS2B  | mixed       |                                                                                                                                                     | + | CtoA | 0.1176 | 0.125  | 3  | 2  | [16,17]   |
| chr11:94441463  | SFRS2B  | mixed       |                                                                                                                                                     | + | CtoA | 0.1053 | 0.1875 | 4  | 2  | [16,19]   |
| chr12:44606989  | SFRS2IP | coding_exon | ENST00000369367:QtoR;                                                                                                                               | - | AtoG | 0.1    | 0.2    | 6  | 2  | [10,10]   |
| chr6:36670130   | SFRS3   | UTR5        |                                                                                                                                                     | + | GtoC | 0.1    | 0.2    | 4  | 3  | [10,20]   |
| chr6:36670131   | SFRS3   | UTR5        |                                                                                                                                                     | + | AtoT | 0.1111 | 0.2    | 3  | 3  | [10,18]   |
| chr1:29346996   | SFRS4   | UTR3        |                                                                                                                                                     | - | TtoA | 0.1    | 0.1    | 2  | 2  | [10,10]   |
| chr14:69308438  | SFRS5   | UTR3        |                                                                                                                                                     | + | CtoA | 0.1333 | 0.4545 | 5  | 4  | [11,21]   |
| chr14:69303727  | SFRS5   | UTR5        |                                                                                                                                                     | + | TtoA | 0.1    | 0.1    | 3  | 2  | [10,10]   |
| chr14:69303847  | SFRS5   | UTR5        |                                                                                                                                                     | + | CtoG | 0.1111 | 0.1333 | 7  | 4  | [17,36]   |
| chr14:69303848  | SFRS5   | UTR5        |                                                                                                                                                     | + | GtoT | 0.1026 | 0.129  | 8  | 3  | [17,39]   |
| chr20:41524166  | SFRS6   | UTR3        |                                                                                                                                                     | + | TtoC | 0.1    | 0.1053 | 4  | 2  | [10,19]   |
| chr20:41524171  | SFRS6   | UTR3        |                                                                                                                                                     | + | TtoA | 0.1    | 0.1818 | 4  | 2  | [11,11]   |
| chr20:41525617  | SFRS6   | UTR3        |                                                                                                                                                     | + | TtoA | 0.1176 | 0.125  | 4  | 2  | [17,17]   |
| chr12:130776121 | SFRS8   | coding_exon |                                                                                                                                                     | + | GtoA | 0.1    | 0.1538 | 5  | 2  | [13,20]   |
| chr12:130807102 | SFRS8   | coding_exon |                                                                                                                                                     | + | AtoG | 0.1111 | 0.1111 | 2  | 2  | [18,27]   |
| chr12:119383892 | SFRS9   | UTR3        |                                                                                                                                                     | - | AtoG | 0.1429 | 0.2727 | 7  | 6  | [10,17]   |
| chr12:119383894 | SFRS9   | UTR3        |                                                                                                                                                     | - | CtoA | 0.1282 | 0.1667 | 8  | 2  | [13,39]   |
| chr6:166658051  | SFT2D1  | mixed       |                                                                                                                                                     | - | TtoG | 0.1084 | 0.2097 | 14 | 10 | [40,163]  |
| chr1:166467730  | SFT2D2  | coding_exon | ENST00000271375:LtoQ;ENST00000367825:LtoQ;ENST00000367829:LtoQ;                                                                                     | + | TtoA | 0.1    | 0.1    | 4  | 2  | [10,10]   |
| chr5:174887433  | SFXN1   | UTR3        |                                                                                                                                                     | + | TtoC | 0.1    | 0.1081 | 3  | 2  | [10,37]   |
| chr10:104485618 | SFXN2   | coding_exon | ENST00000369893:FtoL;                                                                                                                               | + | CtoG | 0.1    | 0.1    | 2  | 2  | [10,10]   |
| chr10:104487689 | SFXN2   | UTR3        |                                                                                                                                                     | + | GtoA | 0.1    | 0.3333 | 4  | 2  | [12,20]   |
| chr10:104487858 | SFXN2   | UTR3        |                                                                                                                                                     | + | AtoG | 0.1    | 0.1538 | 2  | 2  | [10,13]   |
| chr10:104487872 | SFXN2   | UTR3        |                                                                                                                                                     | + | AtoG | 0.1538 | 0.1667 | 2  | 2  | [12,13]   |
| chr10:120895771 | SFXN4   | mixed       |                                                                                                                                                     | - | AtoG | 0.1111 | 0.1176 | 4  | 2  | [17,18]   |
| chr7:94055951   | SGCE    | coding_exon | ENST00000265735:QtoR;ENST00000379889:QtoR;ENST00000415788:QtoR;ENST00000265735:QtoR;                                                                | - | AtoG | 0.1    | 0.1    | 3  | 2  | [10,10]   |
| chr6:134533920  | SGK1    | coding_exon |                                                                                                                                                     | - | AtoG | 0.1    | 0.1429 | 2  | 2  | [10,14]   |
| chr10:51773471  | SGMS1   | coding_exon | ENST00000361781:LtoQ;                                                                                                                               | - | TtoA | 0.1    | 0.1    | 3  | 2  | [10,20]   |
| chr2:201144344  | SGOL2   | coding_exon | ENST00000357799:CtoS;                                                                                                                               | + | TtoA | 0.1    | 0.2    | 2  | 2  | [10,10]   |
| chr10:72308323  | SGPL1   | UTR3        |                                                                                                                                                     | + | AtoG | 0.1    | 0.1429 | 3  | 2  | [10,14]   |
| chr17:75797934  | SGSH    | UTR3        |                                                                                                                                                     | - | TtoC | 0.1026 | 0.1739 | 6  | 5  | [19,39]   |
| chr17:75797956  | SGSH    | UTR3        |                                                                                                                                                     | - | GtoA | 0.1667 | 0.2    | 3  | 2  | [12,15]   |
| chr22:39134968  | SGSM3   | coding_exon | ENST00000248929:NtoS;ENST00000454798:NtoS;                                                                                                          | + | AtoG | 0.1    | 0.1667 | 9  | 2  | [12,21]   |
| chr22:39132451  | SGSM3   | mixed       |                                                                                                                                                     | + | TtoC | 0.1163 | 0.1667 | 6  | 2  | [12,43]   |
| chr16:28787871  | SH2B1   | coding_exon | ENST00000337120:QtoR;ENST00000359285:QtoR;ENST00000395532:QtoR;                                                                                     | + | AtoG | 0.125  | 0.1667 | 6  | 3  | [13,18]   |
| chr16:28788191  | SH2B1   | coding_exon | ENST00000337120:DtoA;ENST00000359285:DtoA;ENST00000395532:DtoA;                                                                                     | + | AtoC | 0.1    | 0.1    | 2  | 2  | [10,10]   |

|                 |          |             |                                                                                      |   |      |        |        |    |    |          |
|-----------------|----------|-------------|--------------------------------------------------------------------------------------|---|------|--------|--------|----|----|----------|
| chr16:28792291  | SH2B1    | mixed       |                                                                                      | + | AtaC | 0.1    | 0.1    | 2  | 2  | [10,10]  |
| chr12:110370178 | SH2B3    | coding_exon | ENST00000341259:NtoD;                                                                | + | AtaG | 0.125  | 0.15   | 2  | 2  | [16,20]  |
| chr12:110371229 | SH2B3    | UTR3        |                                                                                      | + | TtoC | 0.1333 | 0.1667 | 4  | 2  | [12,15]  |
| chr12:110372045 | SH2B3    | UTR3        |                                                                                      | + | AtaG | 0.1    | 0.1    | 2  | 2  | [10,10]  |
| chr12:110372534 | SH2B3    | UTR3        |                                                                                      | + | TtoG | 0.1176 | 0.125  | 6  | 2  | [16,18]  |
| chr9:129580700  | SH2D3C   | coding_exon | ENST00000314830:KtoE;                                                                | - | AtaG | 0.1    | 0.1818 | 2  | 2  | [10,11]  |
| chr9:129541783  | SH2D3C   | coding_exon |                                                                                      | - | GtoA | 0.1    | 0.1111 | 2  | 2  | [10,18]  |
| chr9:129553300  | SH2D3C   | mixed       |                                                                                      | - | CtoA | 0.1    | 0.1    | 2  | 2  | [10,10]  |
| chr4:2796651    | SH3BP2   | coding_exon | ENST00000356331:StoG;ENST00000442312:StoG;ENST00000452765:StoG;                      | + | AtaG | 0.12   | 0.1538 | 6  | 3  | [13,25]  |
| chr4:2801116    | SH3BP2   | coding_exon | ENST00000356331:KtoE;ENST00000435136:KtoE;ENST00000442312:KtoE;ENST00000452765:KtoE; | + | AtaG | 0.1    | 0.1    | 2  | 2  | [10,10]  |
| chr3:15271888   | SH3BP5   | UTR3        |                                                                                      | - | TtoG | 0.1667 | 0.6    | 5  | 4  | [12,30]  |
| chr3:15272510   | SH3BP5   | UTR3        |                                                                                      | - | AtaG | 0.1    | 0.1    | 3  | 2  | [10,10]  |
| chr1:247073175  | SH3BP5L  | coding_exon |                                                                                      | - | GtoC | 0.1    | 0.1    | 2  | 2  | [10,10]  |
| chr1:247072344  | SH3BP5L  | UTR3        |                                                                                      | - | TtoA | 0.1    | 0.1    | 2  | 2  | [10,10]  |
| chr17:40837419  | SH3D20   | coding_exon | ENST00000376922:RtoK;ENST00000428638:RtoK;ENST00000442348:RtoK;ENST00000452765:RtoK; | - | GtoA | 0.1429 | 0.2    | 2  | 2  | [10,21]  |
| chr1:86981578   | SH3GLB1  | UTR3        |                                                                                      | + | TtoA | 0.1176 | 0.1818 | 7  | 4  | [12,17]  |
| chr10:105352305 | SH3PXD2A | coding_exon | ENST00000315994:GtoV;ENST0000035946:GtoV;ENST00000369774:GtoV;                       | - | GtoT | 0.1    | 0.1    | 2  | 2  | [10,20]  |
| chr4:8288125    | SH3TC1   | coding_exon |                                                                                      | + | TtoG | 0.1    | 0.1111 | 3  | 2  | [10,18]  |
| chr16:45174955  | SHCBP1   | coding_exon | ENST00000303383:QtoR;                                                                | - | AtaG | 0.1    | 0.1053 | 2  | 2  | [10,19]  |
| chr16:45209136  | SHCBP1   | coding_exon | ENST00000303383:EtoK;                                                                | - | GtoA | 0.1    | 0.1    | 3  | 2  | [10,10]  |
| chr12:55914777  | SHMT2    | UTR3        |                                                                                      | + | CtoA | 0.1739 | 0.5714 | 14 | 14 | [15,85]  |
| chr12:55914778  | SHMT2    | UTR3        |                                                                                      | + | CtoA | 0.1    | 0.2778 | 16 | 10 | [10,37]  |
| chr10:112735472 | SHOC2    | coding_exon | ENST00000369452:DtoA;                                                                | + | AtaC | 0.1    | 0.1429 | 2  | 2  | [10,14]  |
| chr10:112713902 | SHOC2    | UTR5        |                                                                                      | + | AtaG | 0.1    | 0.2727 | 4  | 2  | [11,20]  |
| chr3:72944533   | SHO1     | coding_exon | ENST00000325599:TtoA;ENST00000463369:TtoA;                                           | - | AtaG | 0.1    | 0.1    | 2  | 2  | [10,10]  |
| chr5:132186255  | SHROOM1  | UTR3        |                                                                                      | - | CtoT | 0.1    | 0.1    | 2  | 2  | [10,10]  |
| chr11:124011655 | SIAE     | UTR3        |                                                                                      | - | TtoG | 0.1111 | 0.2143 | 2  | 2  | [10,15]  |
| chr11:124011656 | SIAE     | UTR3        |                                                                                      | - | TtoG | 0.1333 | 0.2727 | 2  | 2  | [11,15]  |
| chr3:114827716  | SIDT1    | coding_exon | ENST00000264852:HtoQ;ENST00000393830:HtoQ;                                           | + | CtoG | 0.1    | 0.25   | 6  | 3  | [12,20]  |
| chr3:114827717  | SIDT1    | coding_exon | ENST00000264852:FtoI;ENST00000393830:FtoI;                                           | + | TtoA | 0.1111 | 0.2727 | 6  | 4  | [11,18]  |
| chr11:116571805 | SIDT2    | mixed       |                                                                                      | + | CtoG | 0.1    | 0.1    | 7  | 2  | [20,50]  |
| chr19:56612378  | SIGLEC10 | coding_exon | ENST00000339313:VtoE;ENST00000353836:VtoE;ENST00000432469:VtoE;ENST00000442312:VtoE; | - | TtoA | 0.1    | 0.1    | 2  | 2  | [10,10]  |
| chr11:111100406 | SIK2     | UTR3        |                                                                                      | + | AtaT | 0.1    | 0.1    | 2  | 2  | [10,10]  |
| chr1:115115165  | SIKE1    | UTR3        |                                                                                      | - | TtoA | 0.1    | 0.1    | 2  | 2  | [10,10]  |
| chr15:73449306  | SIN3A    | UTR3        |                                                                                      | - | AtaG | 0.1    | 0.1667 | 2  | 2  | [10,12]  |
| chr15:73451163  | SIN3A    | UTR3        |                                                                                      | - | AtaC | 0.1    | 0.15   | 9  | 2  | [10,20]  |
| chr14:38675563  | SIP1     | UTR3        |                                                                                      | + | TtoC | 0.1    | 0.1667 | 4  | 2  | [10,13]  |
| chr14:71241751  | SIPA1L1  | coding_exon | ENST00000358550:StoG;ENST00000381232:StoG;                                           | + | AtaG | 0.1111 | 0.1176 | 2  | 2  | [17,18]  |
| chr19:43271249  | SIPA1L3  | coding_exon | ENST00000222345:VtoG;                                                                | + | TtoG | 0.1    | 0.1333 | 3  | 3  | [15,30]  |
| chr19:43264917  | SIPA1L3  | coding_exon | ENST00000222345:LtoP;                                                                | + | TtoC | 0.1667 | 0.2    | 2  | 2  | [15,42]  |
| chr19:43264929  | SIPA1L3  | coding_exon | ENST00000222345:DtoG;                                                                | + | AtaG | 0.1667 | 0.3    | 2  | 2  | [10,12]  |
| chr20:1853479   | SIRPA    | coding_exon | ENST00000356025:LtoQ;ENST00000358771:LtoQ;ENST00000400068:LtoQ;ENST00000400068:LtoQ; | + | TtoA | 0.1    | 0.1    | 2  | 2  | [10,11]  |
| chr6:13720083   | SIRT5    | UTR3        |                                                                                      | + | TtoC | 0.1    | 0.2    | 4  | 3  | [10,11]  |
| chr17:77465692  | SIRT7    | coding_exon | ENST00000328666:TtoP;                                                                | - | AtaC | 0.1    | 0.1    | 2  | 2  | [10,10]  |
| chr9:35640389   | SIT1     | coding_exon | ENST00000259608:VtoG;                                                                | - | TtoG | 0.1111 | 0.125  | 3  | 2  | [10,24]  |
| chr9:35639326   | SIT1     | UTR3        |                                                                                      | - | TtoC | 0.1053 | 0.2143 | 13 | 4  | [14,42]  |
| chr17:43594930  | SKAP1    | coding_exon | ENST00000336915:VtoG;                                                                | - | TtoG | 0.1    | 0.1739 | 11 | 6  | [18,65]  |
| chr7:26676315   | SKAP2    | coding_exon | ENST00000345317:WtoG;                                                                | - | TtoG | 0.1    | 0.1818 | 4  | 2  | [10,33]  |
| chr7:26675112   | SKAP2    | UTR3        |                                                                                      | - | CtoG | 0.1    | 0.1176 | 3  | 2  | [10,17]  |
| chr6:32036080   | SKIV2L   | coding_exon | ENST00000375394:LtoP;ENST00000433155:LtoP;                                           | + | TtoC | 0.1    | 0.1176 | 4  | 2  | [10,17]  |
| chr5:54655746   | SKIV2L2  | coding_exon | ENST00000230640:VtoG;                                                                | + | TtoG | 0.1    | 0.1538 | 3  | 2  | [10,13]  |
| chr5:54639611   | SKIV2L2  | coding_exon | ENST00000230640:FtoI;                                                                | + | TtoC | 0.1429 | 0.1579 | 2  | 2  | [14,19]  |
| chr5:133524650  | SKP1     | coding_exon | ENST00000328392:RtoQ;ENST00000353411:RtoQ;                                           | - | GtoA | 0.1176 | 0.125  | 2  | 2  | [16,34]  |
| chr5:133524643  | SKP1     | coding_exon |                                                                                      | - | TtoC | 0.1034 | 0.1333 | 2  | 2  | [15,29]  |
| chr13:77235440  | SLAIN1   | UTR3        |                                                                                      | + | TtoC | 0.1071 | 0.1538 | 7  | 2  | [13,28]  |
| chr4:48118832   | SLAIN2   | coding_exon | ENST00000264313:WtoL;                                                                | + | GtoT | 0.1    | 0.1579 | 2  | 2  | [10,19]  |
| chr4:48118930   | SLAIN2   | UTR3        |                                                                                      | + | AtaG | 0.1333 | 0.1429 | 5  | 2  | [14,16]  |
| chr4:48120669   | SLAIN2   | UTR3        |                                                                                      | + | AtaG | 0.1    | 0.1    | 2  | 2  | [10,10]  |
| chr1:158759594  | SLAMF6   | coding_exon | ENST00000368055:FtoV;ENST00000368057:FtoV;ENST00000368059:FtoV;                      | - | TtoG | 0.1429 | 0.2308 | 5  | 3  | [21,26]  |
| chr1:158725583  | SLAMF6   | coding_exon |                                                                                      | - | AtaC | 0.1    | 0.1667 | 11 | 2  | [12,30]  |
| chr1:158987193  | SLAMF7   | coding_exon |                                                                                      | + | GtoA | 0.1111 | 0.1364 | 3  | 2  | [18,22]  |
| chr1:158987465  | SLAMF7   | coding_exon |                                                                                      | + | TtoC | 0.1    | 0.1    | 2  | 2  | [10,10]  |
| chr16:66537236  | SLC12A4  | mixed       |                                                                                      | - | CtoA | 0.1    | 0.1    | 2  | 2  | [20,20]  |
| chr15:32334843  | SLC12A6  | coding_exon | ENST00000290209:EtoG;ENST00000354181:EtoG;ENST00000397702:EtoG;ENST00000397702:EtoG; | - | AtaG | 0.1    | 0.1111 | 2  | 2  | [10,18]  |
| chr15:32316252  | SLC12A6  | coding_exon |                                                                                      | - | GtoA | 0.1    | 0.1053 | 2  | 2  | [10,19]  |
| chr15:32310901  | SLC12A6  | UTR3        |                                                                                      | - | AtaG | 0.1    | 0.1333 | 3  | 3  | [10,19]  |
| chr15:32311054  | SLC12A6  | UTR3        |                                                                                      | - | TtoC | 0.1    | 0.1667 | 3  | 2  | [10,12]  |
| chr3:126284763  | SLC12A8  | UTR3        |                                                                                      | - | AtaG | 0.1111 | 0.2    | 7  | 4  | [10,18]  |
| chr3:126284764  | SLC12A8  | UTR3        |                                                                                      | - | AtaG | 0.1053 | 0.2    | 10 | 5  | [10,37]  |
| chr11:60463685  | SLC15A3  | mixed       |                                                                                      | - | AtaG | 0.1176 | 0.1818 | 2  | 2  | [17,22]  |
| chr12:127843784 | SLC15A4  | UTR3        |                                                                                      | - | TtoC | 0.125  | 0.1346 | 8  | 2  | [32,52]  |
| chr1:113261772  | SLC16A1  | coding_exon | ENST00000369626:HtoR;                                                                | - | AtaG | 0.1    | 0.1111 | 3  | 2  | [18,21]  |
| chr1:113273340  | SLC16A1  | coding_exon |                                                                                      | - | AtaG | 0.1429 | 0.1538 | 2  | 2  | [13,14]  |
| chr1:113256688  | SLC16A1  | UTR3        |                                                                                      | - | TtoC | 0.1034 | 0.1111 | 5  | 3  | [18,29]  |
| chr1:113256877  | SLC16A1  | UTR3        |                                                                                      | - | GtoA | 0.1053 | 0.1333 | 3  | 2  | [15,19]  |
| chr1:113256882  | SLC16A1  | UTR3        |                                                                                      | - | AtaG | 0.1    | 0.1765 | 5  | 3  | [10,19]  |
| chr17:77790645  | SLC16A3  | UTR3        |                                                                                      | + | CtoA | 0.1852 | 0.3667 | 11 | 10 | [10,33]  |
| chr17:77790646  | SLC16A3  | UTR3        |                                                                                      | + | CtoA | 0.1818 | 0.7    | 8  | 8  | [10,24]  |
| chr17:77790647  | SLC16A3  | UTR3        |                                                                                      | + | AtaG | 0.1667 | 0.2667 | 4  | 3  | [12,18]  |
| chr20:61069309  | SLC17A9  | UTR3        |                                                                                      | + | AtaC | 0.2    | 0.2    | 4  | 2  | [20,25]  |
| chr2:65103604   | SLC1A4   | UTR3        |                                                                                      | + | AtaT | 0.1    | 0.1    | 2  | 2  | [10,10]  |
| chr2:113132905  | SLC20A1  | coding_exon | ENST00000272542:LtoV;ENST00000409095:LtoV;                                           | + | TtoG | 0.1    | 0.2143 | 6  | 3  | [10,15]  |
| chr2:113137494  | SLC20A1  | UTR3        |                                                                                      | + | GtoA | 0.1    | 0.1818 | 2  | 2  | [10,11]  |
| chr5:138733093  | SLC23A1  | UTR3        |                                                                                      | - | AtaC | 0.1    | 0.1304 | 8  | 2  | [20,23]  |
| chr20:4803311   | SLC23A2  | coding_exon | ENST00000338244:YtoD;ENST00000379324:YtoD;ENST00000379333:YtoD;ENST00000379333:YtoD; | - | TtoG | 0.1    | 0.1    | 2  | 2  | [10,10]  |
| chr20:4791482   | SLC23A2  | coding_exon | ENST00000338244:StoR;ENST00000379324:StoR;ENST00000379333:StoR;ENST00000379333:StoR; | - | CtoA | 0.1    | 0.1176 | 2  | 2  | [10,17]  |
| chr20:4899564   | SLC23A2  | UTR5        |                                                                                      | - | TtoC | 0.1    | 0.1    | 2  | 2  | [10,20]  |
| chr22:17543395  | SLC25A1  | UTR3        |                                                                                      | - | TtoC | 0.1429 | 0.3077 | 5  | 2  | [13,14]  |
| chr22:17543578  | SLC25A1  | UTR3        |                                                                                      | - | CtoT | 0.1075 | 0.9286 | 12 | 9  | [13,134] |
| chr22:17543581  | SLC25A1  | UTR3        |                                                                                      | - | TtoA | 0.1176 | 0.1667 | 4  | 3  | [17,26]  |
| chr17:77297298  | SLC25A10 | coding_exon | ENST00000331531:KtoN;ENST00000350690:KtoN;                                           | + | GtoT | 0.1053 | 0.1429 | 3  | 2  | [14,19]  |
| chr2:173252334  | SLC25A12 | coding_exon | ENST00000422440:Gto*;                                                                | - | GtoT | 0.1    | 0.12   | 3  | 2  | [20,25]  |
| chr7:95599065   | SLC25A13 | coding_exon | ENST00000265631:HtoR;ENST00000416240:HtoR;                                           | - | AtaG | 0.1    | 0.1429 | 2  | 2  | [10,14]  |
| chr10:69916954  | SLC25A16 | coding_exon |                                                                                      | - | TtoC | 0.1    | 0.125  | 7  | 2  | [10,16]  |
| chr22:39520485  | SLC25A17 | coding_exon | ENST00000435456:EtoG;                                                                | - | AtaG | 0.1    | 0.1    | 2  | 2  | [10,10]  |
| chr22:39496235  | SLC25A17 | UTR3        |                                                                                      | - | CtoA | 0.1    | 0.1    | 2  | 2  | [10,10]  |

|                 |          |             |                                                                                      |   |      |        |        |    |    |          |
|-----------------|----------|-------------|--------------------------------------------------------------------------------------|---|------|--------|--------|----|----|----------|
| chr11:783553    | SLC25A22 | coding_exon | ENST00000320230:FtoS;                                                                | - | TtoC | 0.1    | 0.1333 | 3  | 2  | [10,15]  |
| chr19:6392862   | SLC25A23 | mixed       |                                                                                      | - | AtoG | 0.1029 | 0.2273 | 5  | 5  | [18,68]  |
| chr14:99834934  | SLC25A29 | coding_exon | ENST00000359232:KtoQ;                                                                | - | AtoC | 0.1    | 0.3636 | 2  | 2  | [10,11]  |
| chr12:97519606  | SLC25A3  | UTR3        |                                                                                      | + | AtoG | 0.1471 | 0.2727 | 9  | 6  | [11,34]  |
| chr3:142177823  | SLC25A36 | coding_exon |                                                                                      | + | AtoG | 0.1538 | 0.1538 | 6  | 2  | [13,13]  |
| chr3:142178168  | SLC25A36 | UTR3        |                                                                                      | + | GtoA | 0.1    | 0.2222 | 2  | 2  | [10,18]  |
| chr3:142178523  | SLC25A36 | UTR3        |                                                                                      | + | TtoA | 0.1    | 0.1    | 3  | 2  | [10,10]  |
| chr3:142179474  | SLC25A36 | UTR3        |                                                                                      | + | CtoA | 0.1053 | 0.1667 | 2  | 2  | [18,19]  |
| chr3:142179501  | SLC25A36 | UTR3        |                                                                                      | + | AtoG | 0.1    | 0.1    | 3  | 2  | [10,10]  |
| chr3:142180718  | SLC25A36 | UTR3        |                                                                                      | + | TtoC | 0.1111 | 0.15   | 4  | 2  | [18,20]  |
| chr8:23484816   | SLC25A37 | coding_exon | ENST00000290075:YtoD;                                                                | + | TtoG | 0.1    | 0.1538 | 2  | 2  | [10,13]  |
| chr8:23485230   | SLC25A37 | coding_exon | ENST00000290075:StoP;                                                                | + | TtoC | 0.1    | 0.1905 | 2  | 2  | [10,21]  |
| chr19:19079768  | SLC25A42 | coding_exon | ENST00000318596:HtoR;ENST00000454460:HtoR;                                           | + | AtoG | 0.1    | 0.1    | 2  | 2  | [10,10]  |
| chr11:64906534  | SLC25A45 | UTR5        |                                                                                      | - | TtoA | 0.1667 | 0.2    | 2  | 2  | [10,18]  |
| chr5:110126597  | SLC25A46 | UTR3        |                                                                                      | + | GtoA | 0.1034 | 0.1579 | 4  | 2  | [19,29]  |
| chr3:48643688   | SLC26A6  | coding_exon | ENST00000337000:VtoA;ENST00000358747:VtoA;ENST00000383733:VtoA;ENST00000383733:VtoA; | - | TtoC | 0.1    | 0.1    | 2  | 2  | [10,10]  |
| chr3:48638405   | SLC26A6  | UTR3        |                                                                                      | - | CtoG | 0.1    | 0.1    | 2  | 2  | [10,20]  |
| chr9:130144397  | SLC27A4  | mixed       |                                                                                      | + | GtoT | 0.7692 | 1      | 8  | 8  | [11,19]  |
| chr9:130144398  | SLC27A4  | mixed       |                                                                                      | + | AtoC | 0.8182 | 1      | 8  | 8  | [10,19]  |
| chr9:130144453  | SLC27A4  | mixed       |                                                                                      | + | CtoA | 0.9091 | 1      | 15 | 15 | [33,434] |
| chr9:130144454  | SLC27A4  | mixed       |                                                                                      | + | AtoG | 0.9643 | 1      | 14 | 14 | [38,431] |
| chr19:63702079  | SLC27A5  | coding_exon | ENST00000263093:VtoA;ENST00000415559:VtoA;                                           | - | TtoC | 0.1    | 0.2    | 6  | 3  | [10,20]  |
| chr6:44308691   | SLC29A1  | coding_exon | ENST00000313248:LtoP;ENST00000371708:LtoP;ENST00000371713:LtoP;ENST00000371713:LtoP; | + | TtoC | 0.1    | 0.2    | 4  | 2  | [10,10]  |
| chr6:44306069   | SLC29A1  | coding_exon |                                                                                      | + | TtoC | 0.1176 | 0.125  | 3  | 2  | [16,17]  |
| chr6:44301776   | SLC29A1  | mixed       |                                                                                      | + | GtoC | 0.1    | 0.1111 | 2  | 2  | [10,18]  |
| chr6:44301779   | SLC29A1  | mixed       |                                                                                      | + | CtoG | 0.1429 | 0.2    | 2  | 2  | [10,14]  |
| chr22:22567409  | SLC2A11  | mixed       |                                                                                      | + | TtoA | 0.5    | 0.7222 | 6  | 6  | [13,52]  |
| chr22:22567411  | SLC2A11  | mixed       |                                                                                      | + | GtoA | 0.2308 | 0.6    | 12 | 12 | [10,33]  |
| chr22:22567412  | SLC2A11  | mixed       |                                                                                      | + | GtoA | 0.2308 | 0.3077 | 5  | 5  | [10,17]  |
| chr4:41783780   | SLC30A9  | UTR3        |                                                                                      | + | AtoT | 0.1667 | 0.1818 | 3  | 3  | [11,12]  |
| chr4:41783830   | SLC30A9  | UTR3        |                                                                                      | + | CtoA | 0.1739 | 0.25   | 4  | 2  | [12,23]  |
| chr6:88278411   | SLC35A1  | UTR3        |                                                                                      | + | TtoC | 0.1    | 0.1    | 2  | 2  | [10,10]  |
| chr17:45133802  | SLC35B1  | UTR3        |                                                                                      | - | TtoC | 0.12   | 0.1538 | 10 | 3  | [14,25]  |
| chr6:44330143   | SLC35B2  | UTR3        |                                                                                      | - | TtoC | 0.1333 | 0.3636 | 11 | 9  | [11,20]  |
| chr6:44330144   | SLC35B2  | UTR3        |                                                                                      | - | TtoA | 0.1    | 0.1333 | 5  | 3  | [10,16]  |
| chr6:8373210    | SLC35B3  | coding_exon |                                                                                      | - | TtoC | 0.1    | 0.1    | 2  | 2  | [10,10]  |
| chr7:133634834  | SLC35B4  | coding_exon |                                                                                      | - | AtoG | 0.1    | 0.1111 | 2  | 2  | [10,10]  |
| chr7:133635543  | SLC35B4  | coding_exon |                                                                                      | - | AtoG | 0.1    | 0.1538 | 3  | 2  | [10,13]  |
| chr11:45789026  | SLC35C1  | coding_exon | ENST00000314134:LtoH;ENST00000442528:LtoH;ENST00000456334:LtoH;                      | + | TtoA | 0.1    | 0.1    | 3  | 2  | [10,10]  |
| chr1:67241316   | SLC35D1  | UTR3        |                                                                                      | - | TtoG | 0.1    | 0.1    | 2  | 2  | [10,10]  |
| chr21:42874066  | SLC37A1  | UTR3        |                                                                                      | + | TtoC | 0.12   | 0.1429 | 2  | 2  | [14,26]  |
| chr11:118400313 | SLC37A4  | UTR3        |                                                                                      | - | TtoC | 0.1    | 0.2727 | 6  | 2  | [11,20]  |
| chr11:118405349 | SLC37A4  | UTR5        |                                                                                      | - | AtoG | 0.1176 | 0.1429 | 5  | 2  | [17,21]  |
| chr12:44869108  | SLC38A1  | coding_exon | ENST00000354341:WtoR;ENST00000398637:LtoS;ENST00000439706:LtoS;                      | - | TtoC | 0.1    | 0.1    | 2  | 2  | [10,10]  |
| chr12:44865532  | SLC38A1  | UTR3        |                                                                                      | - | GtoA | 0.1    | 0.2143 | 3  | 2  | [10,14]  |
| chr12:44866431  | SLC38A1  | UTR3        |                                                                                      | - | AtoG | 0.1    | 0.1176 | 2  | 2  | [10,17]  |
| chr17:76864428  | SLC38A10 | coding_exon | ENST00000288439:VtoG;ENST00000374759:VtoG;                                           | - | TtoG | 0.1071 | 0.2    | 4  | 3  | [15,28]  |
| chr17:76839651  | SLC38A10 | coding_exon | ENST00000288439:MtoL;                                                                | - | AtoT | 0.1    | 0.1875 | 4  | 2  | [10,16]  |
| chr17:76834368  | SLC38A10 | coding_exon |                                                                                      | - | TtoG | 0.1    | 0.1    | 2  | 2  | [10,10]  |
| chr12:45046995  | SLC38A2  | coding_exon | ENST00000256689:AtoD;ENST00000395444:AtoD;                                           | - | CtoA | 0.1    | 0.2    | 2  | 2  | [10,10]  |
| chr12:45046994  | SLC38A2  | coding_exon |                                                                                      | - | TtoG | 0.1    | 0.2    | 3  | 2  | [10,10]  |
| chr1:152198283  | SLC39A1  | UTR3        |                                                                                      | - | AtoG | 0.1    | 0.1154 | 8  | 2  | [26,30]  |
| chr17:68154824  | SLC39A11 | UTR3        |                                                                                      | - | TtoG | 0.1    | 0.2    | 2  | 2  | [10,10]  |
| chr11:47393418  | SLC39A13 | coding_exon |                                                                                      | + | CtoA | 0.1    | 0.1    | 3  | 2  | [10,10]  |
| chr8:22333086   | SLC39A14 | coding_exon | ENST00000289952:LtoP;ENST00000359741:LtoP;ENST00000381237:LtoP;                      | + | TtoC | 0.1    | 0.1818 | 4  | 3  | [10,11]  |
| chr8:22321881   | SLC39A14 | coding_exon |                                                                                      | + | GtoA | 0.1    | 0.1    | 3  | 2  | [10,10]  |
| chr8:22335911   | SLC39A14 | mixed       |                                                                                      | + | GtoC | 0.1    | 0.1111 | 4  | 2  | [10,18]  |
| chr8:22335912   | SLC39A14 | mixed       |                                                                                      | + | AtoT | 0.1053 | 0.1176 | 4  | 2  | [17,19]  |
| chr19:2683575   | SLC39A3  | UTR3        |                                                                                      | - | TtoA | 0.1    | 0.1    | 2  | 2  | [10,10]  |
| chr4:103401953  | SLC39A8  | mixed       |                                                                                      | - | AtoG | 0.1667 | 0.2    | 3  | 2  | [10,12]  |
| chr14:68997542  | SLC39A9  | UTR3        |                                                                                      | + | GtoT | 0.1    | 0.2    | 3  | 2  | [15,20]  |
| chr14:68998166  | SLC39A9  | UTR3        |                                                                                      | + | GtoA | 0.5417 | 0.8125 | 2  | 2  | [16,24]  |
| chr3:127208179  | SLC41A3  | mixed       |                                                                                      | - | TtoG | 0.1    | 0.1    | 3  | 2  | [10,10]  |
| chr11:57018067  | SLC43A1  | coding_exon |                                                                                      | - | GtoA | 0.1    | 0.1    | 3  | 2  | [10,10]  |
| chr11:56948064  | SLC43A3  | coding_exon | ENST00000352187:TtoP;ENST00000395123:TtoP;ENST00000395124:TtoP;ENST00000395124:TtoP; | - | AtoC | 0.1127 | 0.2041 | 8  | 4  | [49,71]  |
| chr11:56948067  | SLC43A3  | coding_exon | ENST00000352187:TtoP;ENST00000395123:TtoP;ENST00000395124:TtoP;ENST00000395124:TtoP; | - | AtoC | 0.1    | 0.1017 | 4  | 2  | [10,59]  |
| chr11:56945044  | SLC43A3  | coding_exon | ENST00000352187:StoP;ENST00000395123:StoP;ENST00000395124:StoP;ENST00000395124:StoP; | - | TtoC | 0.12   | 0.2174 | 9  | 5  | [15,62]  |
| chr11:56931742  | SLC43A3  | UTR3        |                                                                                      | - | AtoC | 0.1169 | 0.25   | 4  | 2  | [32,77]  |
| chr19:10609707  | SLC44A2  | coding_exon | ENST00000335757:VtoG;ENST00000407327:VtoG;                                           | + | TtoG | 0.1    | 0.2308 | 6  | 3  | [13,21]  |
| chr2:27764390   | SLC4A1AP | coding_exon |                                                                                      | + | AtoG | 0.1    | 0.1    | 2  | 2  | [10,10]  |
| chr2:27771134   | SLC4A1AP | UTR3        |                                                                                      | + | AtoG | 0.1    | 0.1818 | 3  | 2  | [10,12]  |
| chr3:27390757   | SLC4A7   | UTR3        |                                                                                      | - | TtoC | 0.1    | 0.1538 | 2  | 2  | [10,13]  |
| chr3:14484623   | SLC6A6   | coding_exon | ENST00000360861:LtoR;ENST00000454876:LtoR;                                           | + | TtoG | 0.1    | 0.2    | 2  | 2  | [10,10]  |
| chr13:28983497  | SLC7A1   | UTR3        |                                                                                      | - | CtoG | 0.1176 | 0.1429 | 4  | 2  | [14,17]  |
| chr13:28984192  | SLC7A1   | UTR3        |                                                                                      | - | TtoA | 0.1    | 0.1818 | 2  | 2  | [10,11]  |
| chr13:28984975  | SLC7A1   | UTR3        |                                                                                      | - | AtoC | 0.1    | 0.1154 | 2  | 2  | [10,26]  |
| chr16:86430826  | SLC7A5   | coding_exon | ENST00000261622:StoP;                                                                | - | TtoC | 0.1176 | 0.1818 | 2  | 2  | [11,17]  |
| chr16:86424074  | SLC7A5   | UTR3        |                                                                                      | - | AtoG | 0.1    | 0.1    | 2  | 2  | [10,10]  |
| chr16:66888213  | SLC7A6   | mixed       |                                                                                      | + | GtoA | 0.1    | 0.1    | 2  | 2  | [10,10]  |
| chr16:66858121  | SLC7A6   | UTR5        |                                                                                      | + | GtoT | 0.1    | 0.1667 | 6  | 2  | [10,18]  |
| chr16:66866097  | SLC7A6   | UTR5        |                                                                                      | + | CtoA | 0.1    | 0.1538 | 3  | 2  | [13,20]  |
| chr14:22313165  | SLC7A7   | coding_exon | ENST00000285850:LtoV;ENST00000397528:LtoV;ENST00000397529:LtoV;ENST00000397529:LtoV; | - | CtoG | 0.1053 | 0.1111 | 5  | 2  | [18,19]  |
| chr14:22313163  | SLC7A7   | coding_exon |                                                                                      | - | CtoA | 0.1    | 0.1111 | 5  | 2  | [18,20]  |
| chr1:27308608   | SLC9A1   | coding_exon | ENST00000263980:MtoT;ENST00000374086:MtoT;                                           | - | TtoC | 0.1    | 0.1818 | 2  | 2  | [10,11]  |
| chr20:47865033  | SLC9A8   | coding_exon |                                                                                      | + | GtoA | 0.1    | 0.1    | 2  | 2  | [10,10]  |
| chr17:30796721  | SLFN13   | coding_exon | ENST00000285013:RtoK;                                                                | - | GtoA | 0.1    | 0.1    | 3  | 2  | [10,10]  |
| chr18:12417110  | SLMO1    | coding_exon | ENST00000336990:MtoR;ENST00000430510:MtoR;ENST00000440960:MtoR;                      | + | TtoG | 0.1    | 0.1818 | 2  | 2  | [10,11]  |
| chr15:57011912  | SLTM     | coding_exon | ENST00000249735:DtoG;ENST00000380516:DtoG;                                           | - | AtoG | 0.1    | 0.1538 | 2  | 2  | [10,13]  |
| chr15:57011905  | SLTM     | coding_exon | ENST00000249735:DtoE;ENST00000380516:DtoE;                                           | - | TtoA | 0.1    | 0.1176 | 4  | 2  | [10,17]  |
| chr15:56972482  | SLTM     | mixed       |                                                                                      | - | AtoG | 0.1176 | 0.125  | 2  | 2  | [16,17]  |
| chr15:56958590  | SLTM     | UTR3        |                                                                                      | - | TtoC | 0.1    | 0.1875 | 8  | 3  | [10,23]  |
| chr5:159772046  | SLU7     | coding_exon | ENST00000297151:VtoA;                                                                | - | TtoC | 0.1765 | 0.1818 | 3  | 2  | [11,17]  |
| chr5:159761412  | SLU7     | UTR3        |                                                                                      | - | TtoC | 0.1    | 0.2222 | 6  | 3  | [10,27]  |
| chr4:146694412  | SMAD1    | coding_exon | ENST00000302085:EtoK;ENST00000394092:EtoK;                                           | + | GtoA | 0.1    | 0.1    | 3  | 2  | [10,10]  |
| chr18:43620821  | SMAD2    | UTR3        |                                                                                      | - | TtoC | 0.1    | 0.1579 | 3  | 2  | [10,19]  |
| chr18:46859750  | SMAD4    | UTR3        |                                                                                      | + | AtoG | 0.1    | 0.1111 | 3  | 2  | [10,18]  |



|                 |          |             |                                                                                                                                                                                                                    |   |      |        |        |    |    |          |
|-----------------|----------|-------------|--------------------------------------------------------------------------------------------------------------------------------------------------------------------------------------------------------------------|---|------|--------|--------|----|----|----------|
| chr4:144693779  | SMARCA5  | coding_exon | ENST00000283131:KtoE;                                                                                                                                                                                              | + | AtoG | 0.1111 | 0.125  | 4  | 2  | [32,45]  |
| chr2:217005833  | SMARCAL1 | coding_exon | ENST00000357276:EtoD;ENST00000358207:EtoD;                                                                                                                                                                         | + | GtoT | 0.1    | 0.1    | 2  | 2  | [10,10]  |
| chr22:22506685  | SMARCB1  | UTR3        |                                                                                                                                                                                                                    | + | TtoC | 0.2    | 0.3    | 3  | 3  | [11,50]  |
| chr3:47603812   | SMARCC1  | UTR3        |                                                                                                                                                                                                                    | - | TtoA | 0.1538 | 0.4444 | 7  | 7  | [13,25]  |
| chr12:54843803  | SMARCC2  | coding_exon |                                                                                                                                                                                                                    | - | CtoT | 0.1333 | 0.5294 | 2  | 2  | [15,34]  |
| chr12:54842514  | SMARCC2  | UTR3        |                                                                                                                                                                                                                    | - | TtoG | 0.1111 | 0.1111 | 3  | 2  | [10,19]  |
| chr12:54843337  | SMARCC2  | UTR3        |                                                                                                                                                                                                                    | - | TtoA | 0.1    | 0.1    | 2  | 2  | [10,10]  |
| chr12:48768597  | SMARCD1  | coding_exon |                                                                                                                                                                                                                    | + | TtoA | 0.1    | 0.1111 | 4  | 2  | [10,10]  |
| chr12:48780648  | SMARCD1  | UTR3        |                                                                                                                                                                                                                    | + | TtoC | 0.1    | 0.1667 | 4  | 3  | [10,16]  |
| chr17:36038551  | SMARCE1  | UTR3        |                                                                                                                                                                                                                    | - | TtoG | 0.1111 | 0.1765 | 2  | 2  | [17,18]  |
| chr9:105898288  | SMC2     | coding_exon |                                                                                                                                                                                                                    | + | TtoC | 0.1    | 0.1667 | 3  | 3  | [10,12]  |
| chr9:105941952  | SMC2     | UTR3        |                                                                                                                                                                                                                    | + | AtoG | 0.1    | 0.1    | 3  | 2  | [10,10]  |
| chr9:105942547  | SMC2     | UTR3        |                                                                                                                                                                                                                    | + | TtoG | 0.1    | 0.1    | 3  | 2  | [10,10]  |
| chr10:112350812 | SMC3     | coding_exon | ENST00000361804:TtoP;                                                                                                                                                                                              | + | AtoC | 0.1    | 0.2143 | 4  | 2  | [10,14]  |
| chr3:161603194  | SMC4     | coding_exon | ENST00000344722:KtoE;ENST00000357388:KtoE;ENST00000360111:KtoE;ENST00000361138:LtoR;                                                                                                                               | + | AtoG | 0.1    | 0.1429 | 7  | 4  | [10,37]  |
| chr9:72152671   | SMC5     | coding_exon | ENST00000361138:LtoR;                                                                                                                                                                                              | + | TtoG | 0.1    | 0.1    | 4  | 2  | [10,10]  |
| chr9:72182840   | SMC5     | coding_exon | ENST00000361138:DtoE;                                                                                                                                                                                              | + | TtoA | 0.1    | 0.1053 | 2  | 2  | [10,19]  |
| chr2:17748038   | SMC6     | coding_exon | ENST00000351948:DtoA;ENST00000381272:DtoA;ENST00000402989:DtoA;ENST00000351948:AtoS;ENST00000381272:AtoS;ENST00000402989:AtoS;ENST00000351948:GtoT;                                                                | - | AtoC | 0.1    | 0.1429 | 2  | 2  | [10,14]  |
| chr2:17748009   | SMC6     | coding_exon | ENST00000351948:AtoS;ENST00000381272:AtoS;ENST00000402989:AtoS;ENST00000351948:GtoT;                                                                                                                               | - | GtoT | 0.1    | 0.1818 | 2  | 2  | [10,11]  |
| chr2:17741064   | SMC6     | coding_exon | ENST00000351948:AtoS;ENST00000381272:AtoS;ENST00000402989:AtoS;ENST00000351948:GtoT;                                                                                                                               | - | AtoG | 0.1    | 0.1053 | 2  | 2  | [10,19]  |
| chr14:90998922  | SMEK1    | coding_exon | ENST00000337238:LtoP;ENST00000417249:LtoP;ENST00000417427:LtoP;ENST00000337238:KtoN;ENST00000417249:KtoN;ENST00000417427:KtoN;ENST00000337238:CtoS;ENST00000417249:CtoS;ENST00000417427:CtoS;ENST00000337238:TtoC; | - | TtoC | 0.1    | 0.1    | 3  | 2  | [10,10]  |
| chr14:91026850  | SMEK1    | coding_exon | ENST00000337238:KtoN;ENST00000417249:KtoN;ENST00000417427:KtoN;ENST00000337238:CtoS;ENST00000417249:CtoS;ENST00000417427:CtoS;ENST00000337238:TtoC;                                                                | - | AtoT | 0.1    | 0.1    | 3  | 3  | [10,10]  |
| chr14:91006934  | SMEK1    | coding_exon | ENST00000337238:CtoS;ENST00000417249:CtoS;ENST00000417427:CtoS;ENST00000337238:TtoC;                                                                                                                               | - | TtoA | 0.1176 | 0.2    | 4  | 2  | [10,17]  |
| chr14:91012031  | SMEK1    | coding_exon | ENST00000337238:CtoS;ENST00000417249:CtoS;ENST00000417427:CtoS;ENST00000337238:TtoC;                                                                                                                               | - | TtoA | 0.1    | 0.1    | 4  | 2  | [10,10]  |
| chr2:55648888   | SMEK2    | coding_exon |                                                                                                                                                                                                                    | - | TtoC | 0.1111 | 0.125  | 3  | 2  | [16,19]  |
| chr2:55679492   | SMEK2    | mixed       |                                                                                                                                                                                                                    | - | TtoC | 0.1    | 0.1667 | 5  | 3  | [10,19]  |
| chr16:18736292  | SMG1     | coding_exon | ENST00000389467:VtoA;ENST00000446231:VtoA;                                                                                                                                                                         | - | TtoC | 0.1    | 0.3    | 5  | 2  | [10,10]  |
| chr16:18724828  | SMG1     | UTR3        |                                                                                                                                                                                                                    | - | TtoC | 0.1    | 0.1053 | 3  | 2  | [10,19]  |
| chr16:18726245  | SMG1     | UTR3        |                                                                                                                                                                                                                    | - | AtoG | 0.1    | 0.1    | 2  | 2  | [10,10]  |
| chr16:18726406  | SMG1     | UTR3        |                                                                                                                                                                                                                    | - | AtoG | 0.1    | 0.1429 | 4  | 2  | [10,14]  |
| chr1:154502445  | SMG5     | coding_exon | ENST00000361813:StoP;                                                                                                                                                                                              | - | TtoC | 0.1    | 0.1034 | 4  | 2  | [30,30]  |
| chr17:2150225   | SMG6     | coding_exon | ENST00000263073:VtoD;                                                                                                                                                                                              | - | TtoA | 0.1    | 0.1    | 2  | 2  | [10,10]  |
| chr17:2149529   | SMG6     | coding_exon | ENST00000263073:GtoV;                                                                                                                                                                                              | - | GtoT | 0.1    | 0.1    | 2  | 2  | [10,10]  |
| chr17:1910694   | SMG6     | UTR3        |                                                                                                                                                                                                                    | - | AtoC | 0.1538 | 0.1667 | 2  | 2  | [12,13]  |
| chr1:18177857   | SMG7     | coding_exon | ENST00000347615:VtoA;ENST00000367537:VtoA;ENST00000367539:VtoA;ENST00000347615:TtoC;                                                                                                                               | + | TtoC | 0.1    | 0.1    | 3  | 2  | [10,10]  |
| chr1:181778011  | SMG7     | coding_exon | ENST00000347615:VtoA;ENST00000367537:VtoA;ENST00000367539:VtoA;ENST00000347615:TtoC;                                                                                                                               | + | AtoG | 0.1    | 0.2    | 2  | 2  | [10,10]  |
| chr1:181787775  | SMG7     | UTR3        |                                                                                                                                                                                                                    | + | TtoC | 0.1053 | 0.1053 | 3  | 2  | [19,19]  |
| chr10:112047322 | SMNDC1   | coding_exon | ENST00000369592:MtoV;ENST00000369603:MtoV;                                                                                                                                                                         | - | AtoG | 0.1    | 0.125  | 3  | 2  | [16,20]  |
| chr10:112045103 | SMNDC1   | coding_exon | ENST00000369592:EtoG;ENST00000369603:EtoG;                                                                                                                                                                         | - | AtoG | 0.1    | 0.1    | 5  | 2  | [10,10]  |
| chr12:52862127  | SMUG1    | mixed       |                                                                                                                                                                                                                    | - | TtoC | 0.1    | 0.1    | 4  | 3  | [10,10]  |
| chr7:98483363   | SMURF1   | coding_exon |                                                                                                                                                                                                                    | - | TtoC | 0.1    | 0.2    | 2  | 2  | [10,10]  |
| chr17:1633184   | SMYD4    | coding_exon | ENST00000305513:AtoS;                                                                                                                                                                                              | - | CtoA | 0.1    | 0.1    | 2  | 2  | [10,10]  |
| chr2:73304614   | SMYD5    | coding_exon |                                                                                                                                                                                                                    | + | TtoC | 0.1    | 0.1111 | 3  | 2  | [10,18]  |
| chr9:15454515   | SNAPC3   | UTR3        |                                                                                                                                                                                                                    | + | GtoA | 0.1364 | 0.1379 | 2  | 2  | [22,29]  |
| chr9:15455450   | SNAPC3   | UTR3        |                                                                                                                                                                                                                    | + | AtoT | 0.1111 | 0.1667 | 4  | 2  | [12,18]  |
| chr9:138406795  | SNAPC4   | coding_exon | ENST00000298532:NtoK;                                                                                                                                                                                              | - | CtoG | 0.1    | 0.1    | 2  | 2  | [10,10]  |
| chr9:138396321  | SNAPC4   | coding_exon | ENST00000298532:LtoR;                                                                                                                                                                                              | - | TtoG | 0.1    | 0.1    | 2  | 2  | [10,10]  |
| chr7:127519882  | SND1     | UTR3        |                                                                                                                                                                                                                    | + | GtoA | 0.3077 | 0.7895 | 6  | 5  | [10,19]  |
| chr17:44362774  | SNF8     | UTR3        |                                                                                                                                                                                                                    | - | GtoA | 0.1071 | 0.125  | 4  | 2  | [16,28]  |
| chr17:44362776  | SNF8     | UTR3        |                                                                                                                                                                                                                    | - | TtoC | 0.1071 | 0.28   | 8  | 5  | [23,55]  |
| chr1:28778910   | SNHG12   | coding_exon |                                                                                                                                                                                                                    | - | TtoG | 0.15   | 0.1538 | 5  | 2  | [13,20]  |
| chr1:3775939    | SNIP1    | coding_exon | ENST00000296215:StoS;ENST00000436196:StoS;                                                                                                                                                                         | - | CtoA | 0.1    | 0.1053 | 2  | 2  | [10,19]  |
| chr1:37790860   | SNIP1    | coding_exon | ENST00000296215:StoS;ENST00000436196:StoS;                                                                                                                                                                         | - | TtoC | 0.1667 | 0.2    | 2  | 2  | [10,12]  |
| chr16:11680101  | SNN      | mixed       |                                                                                                                                                                                                                    | + | TtoA | 0.1    | 0.2    | 5  | 3  | [10,28]  |
| chr11:93106225  | SNORA32  | UTR3        |                                                                                                                                                                                                                    | - | CtoT | 0.1    | 0.1    | 2  | 2  | [10,10]  |
| chr11:93114221  | SNORA32  | UTR5        |                                                                                                                                                                                                                    | - | GtoC | 0.1389 | 0.2632 | 4  | 2  | [19,36]  |
| chr9:138739019  | SNORA43  | mixed       |                                                                                                                                                                                                                    | - | TtoA | 0.1111 | 0.12   | 6  | 2  | [18,25]  |
| chr1:28707203   | SNORA73A | mixed       |                                                                                                                                                                                                                    | + | AtoC | 0.1818 | 0.2727 | 2  | 2  | [11,11]  |
| chr6:86443929   | SNORD50B | mixed       |                                                                                                                                                                                                                    | - | TtoA | 0.1212 | 0.1707 | 11 | 5  | [26,65]  |
| chr6:86444573   | SNORD50B | mixed       |                                                                                                                                                                                                                    | - | GtoA | 0.1071 | 0.3333 | 20 | 20 | [28,132] |
| chr6:86444628   | SNORD50B | mixed       |                                                                                                                                                                                                                    | - | CtoT | 0.1154 | 0.2703 | 21 | 20 | [16,78]  |
| chr3:43364348   | SNRK     | coding_exon |                                                                                                                                                                                                                    | + | TtoC | 0.1    | 0.3    | 2  | 2  | [10,10]  |
| chr2:96307286   | SNRNP200 | coding_exon | ENST00000323853:EtoK;                                                                                                                                                                                              | - | GtoA | 0.1176 | 0.125  | 5  | 2  | [16,17]  |
| chr2:96314648   | SNRNP200 | coding_exon | ENST00000323853:EtoD;                                                                                                                                                                                              | - | GtoC | 0.1    | 0.1143 | 3  | 2  | [10,35]  |
| chr12:122516477 | SNRNP35  | coding_exon | ENST00000412157:GtoE;ENST00000438124:GtoE;                                                                                                                                                                         | + | GtoA | 0.1111 | 0.125  | 7  | 4  | [16,35]  |
| chr19:45298188  | SNRNP70  | mixed       |                                                                                                                                                                                                                    | + | CtoT | 0.1    | 0.1    | 2  | 2  | [10,10]  |
| chr19:45963119  | SNRPA    | UTR3        |                                                                                                                                                                                                                    | + | GtoA | 0.1    | 0.1538 | 2  | 2  | [10,13]  |
| chr19:45948962  | SNRPA    | UTR5        |                                                                                                                                                                                                                    | + | GtoT | 0.1    | 0.1304 | 7  | 2  | [10,23]  |
| chr20:2391822   | SNRPB    | coding_exon | ENST00000303103:TtoP;ENST00000336808:HtoP;ENST00000339610:TtoP;ENST00000303103:CtoG;                                                                                                                               | - | AtoC | 0.1119 | 0.3542 | 3  | 2  | [48,144] |
| chr20:16669826  | SNRPB2   | UTR3        |                                                                                                                                                                                                                    | + | CtoG | 0.1    | 0.1    | 4  | 2  | [10,10]  |
| chr22:23298086  | SNRPD3   | UTR3        |                                                                                                                                                                                                                    | + | TtoC | 0.1    | 0.2188 | 9  | 4  | [10,32]  |
| chr22:23298088  | SNRPD3   | UTR3        |                                                                                                                                                                                                                    | + | GtoA | 0.1364 | 0.1667 | 6  | 3  | [13,22]  |
| chr1:202099460  | SNRPE    | coding_exon | ENST00000367208:ItoK;ENST00000414487:ItoK;                                                                                                                                                                         | + | TtoA | 0.1    | 0.125  | 9  | 2  | [16,21]  |
| chr1:202099466  | SNRPE    | coding_exon | ENST00000367208:GtoD;ENST00000414487:GtoD;                                                                                                                                                                         | + | GtoA | 0.1304 | 0.3    | 8  | 7  | [10,23]  |
| chr1:202099468  | SNRPE    | coding_exon | ENST00000367208:CtoG;ENST00000414487:CtoG;                                                                                                                                                                         | + | TtoG | 0.2727 | 0.4167 | 2  | 2  | [12,13]  |
| chr1:202099467  | SNRPE    | coding_exon | ENST00000367208:CtoG;ENST00000414487:CtoG;                                                                                                                                                                         | + | CtoG | 0.1429 | 0.5    | 10 | 8  | [10,21]  |
| chr1:202099416  | SNRPE    | mixed       |                                                                                                                                                                                                                    | + | AtoC | 0.1    | 0.3438 | 13 | 12 | [10,47]  |
| chr12:94783990  | SNRPF    | UTR3        |                                                                                                                                                                                                                    | + | TtoC | 0.1096 | 0.1429 | 8  | 4  | [35,75]  |
| chr14:77253732  | SNW1     | UTR3        |                                                                                                                                                                                                                    | - | TtoC | 0.1    | 0.2    | 3  | 3  | [10,15]  |
| chr15:62222571  | SNX1     | UTR3        |                                                                                                                                                                                                                    | + | AtoC | 0.1    | 0.2    | 2  | 2  | [10,10]  |
| chr7:26378143   | SNX10    | coding_exon |                                                                                                                                                                                                                    | + | AtoG | 0.1667 | 0.2    | 3  | 2  | [12,15]  |
| chr17:43554582  | SNX11    | UTR3        |                                                                                                                                                                                                                    | + | AtoG | 0.1739 | 0.2    | 3  | 2  | [15,23]  |
| chr6:86313628   | SNX14    | mixed       |                                                                                                                                                                                                                    | - | AtoG | 0.1    | 0.1    | 2  | 2  | [10,10]  |
| chr11:64562788  | SNX15    | coding_exon | ENST00000301886:QtoR;ENST00000377244:QtoR;                                                                                                                                                                         | + | AtoG | 0.1111 | 0.125  | 2  | 2  | [16,18]  |
| chr11:130251712 | SNX19    | UTR3        |                                                                                                                                                                                                                    | - | CtoA | 0.1176 | 0.1333 | 3  | 2  | [15,17]  |
| chr15:62235061  | SNX22    | UTR3        |                                                                                                                                                                                                                    | + | AtoG | 0.1    | 0.2143 | 2  | 2  | [10,14]  |
| chr15:62235089  | SNX22    | UTR3        |                                                                                                                                                                                                                    | + | AtoG | 0.1    | 0.2667 | 4  | 3  | [14,22]  |
| chr15:62235578  | SNX22    | UTR3        |                                                                                                                                                                                                                    | + | GtoA | 0.1    | 0.1538 | 5  | 4  | [10,20]  |
| chr4:186504735  | SNX25    | coding_exon |                                                                                                                                                                                                                    | + | TtoA | 0.1    | 0.1053 | 6  | 2  | [11,20]  |
| chr4:186509688  | SNX25    | coding_exon |                                                                                                                                                                                                                    | + | GtoA | 0.1    | 0.2105 | 10 | 3  | [19,20]  |
| chr1:149936600  | SNX27    | UTR3        |                                                                                                                                                                                                                    | + | TtoC | 0.1    | 0.1    | 2  | 2  | [10,10]  |
| chr1:149937582  | SNX27    | UTR3        |                                                                                                                                                                                                                    | + | TtoG | 0.1    | 0.1    | 3  | 2  | [10,10]  |
| chr1:149937718  | SNX27    | UTR3        |                                                                                                                                                                                                                    | + | TtoA | 0.1    | 0.1    | 4  | 2  | [10,10]  |
| chr16:12062956  | SNX29    | coding_exon | ENST0000030630:StoS;ENST00000323433:StoS;                                                                                                                                                                          | + | TtoC | 0.1429 | 0.2    | 5  | 2  | [10,14]  |
| chr16:12570807  | SNX29    | UTR3        |                                                                                                                                                                                                                    | + | TtoG | 0.1    | 0.1    | 2  | 2  | [10,10]  |
| chr16:12571932  | SNX29    | UTR3        |                                                                                                                                                                                                                    | + | TtoC | 0.1333 | 0.1818 | 5  | 3  | [11,17]  |

|                 |         |             |                                                                                      |   |      |        |        |    |    |         |
|-----------------|---------|-------------|--------------------------------------------------------------------------------------|---|------|--------|--------|----|----|---------|
| chr16:12572516  | SNX29   | UTR3        |                                                                                      | + | TtoC | 0.1    | 0.1111 | 2  | 2  | [10,18] |
| chr16:12574317  | SNX29   | UTR3        |                                                                                      | + | AtoG | 0.1    | 0.1333 | 4  | 2  | [15,20] |
| chr16:12575449  | SNX29   | UTR3        |                                                                                      | + | TtoA | 0.1    | 0.1111 | 2  | 2  | [10,10] |
| chr20:17889859  | SNX5    | coding_exon |                                                                                      | - | TtoC | 0.1    | 0.1    | 4  | 2  | [10,10] |
| chr20:17889969  | SNX5    | coding_exon |                                                                                      | - | TtoG | 0.1333 | 0.2    | 3  | 2  | [10,15] |
| chr20:17870497  | SNX5    | UTR3        |                                                                                      | - | AtoG | 0.1333 | 0.1667 | 4  | 2  | [13,15] |
| chr14:34148653  | SNX6    | mixed       |                                                                                      | - | TtoC | 0.1    | 0.1    | 3  | 2  | [10,10] |
| chr1:177584669  | SOAT1   | coding_exon | ENST00000367619:LtoQ;                                                                | + | TtoA | 0.1    | 0.1    | 5  | 2  | [10,11] |
| chr16:11255859  | SOCS1   | mixed       |                                                                                      | - | TtoG | 0.2    | 0.2857 | 2  | 2  | [11,14] |
| chr12:92493367  | SOCS2   | UTR3        |                                                                                      | + | GtoA | 0.1    | 0.1    | 2  | 2  | [10,10] |
| chr14:54580002  | SOCS4   | coding_exon | ENST00000395472:TtoS;                                                                | + | AtoT | 0.1    | 0.1333 | 2  | 2  | [10,15] |
| chr14:54580000  | SOCS4   | coding_exon | ENST00000395472:Stol;                                                                | + | GtoT | 0.1    | 0.125  | 2  | 2  | [10,16] |
| chr21:31962835  | SOD1    | UTR3        |                                                                                      | + | TtoA | 0.1091 | 0.2121 | 11 | 3  | [33,55] |
| chr21:31962851  | SOD1    | UTR3        |                                                                                      | + | TtoA | 0.1053 | 0.2143 | 13 | 5  | [14,30] |
| chr6:160023556  | SOD2    | coding_exon | ENST00000337404:WtoR;ENST00000367054:WtoR;ENST00000367055:WtoR;ENST00000367056:WtoR; | - | TtoC | 0.1    | 0.1429 | 7  | 2  | [14,30] |
| chr6:160020236  | SOD2    | UTR3        |                                                                                      | - | TtoC | 0.1538 | 0.1667 | 7  | 2  | [12,13] |
| chr16:536967    | SOLH    | coding_exon | ENST00000219611:VtoA;ENST00000397687:VtoA;                                           | + | TtoC | 0.1    | 0.1    | 2  | 2  | [10,10] |
| chr21:33853781  | SON     | coding_exon | ENST00000300278:AtoT;ENST00000321758:AtoT;ENST00000356577:AtoT;ENST00000356578:AtoT; | + | GtoA | 0.963  | 1      | 16 | 16 | [18,92] |
| chr21:33845126  | SON     | coding_exon |                                                                                      | + | AtoG | 0.1071 | 0.1154 | 8  | 2  | [26,28] |
| chr21:33845189  | SON     | coding_exon |                                                                                      | + | AtoG | 0.1026 | 0.1667 | 8  | 4  | [39,60] |
| chr11:121003630 | SORL1   | coding_exon | ENST00000260197:NtoT;                                                                | + | AtoC | 0.1026 | 0.1739 | 3  | 3  | [17,39] |
| chr11:121006940 | SORL1   | UTR3        |                                                                                      | + | AtoG | 0.5968 | 0.6145 | 2  | 2  | [62,83] |
| chr11:121007309 | SORL1   | UTR3        |                                                                                      | + | AtoT | 0.1    | 0.1538 | 3  | 2  | [10,13] |
| chr2:39065512   | SOS1    | UTR3        |                                                                                      | - | AtoG | 0.1    | 0.1    | 2  | 2  | [10,10] |
| chr6:21702335   | SOX4    | mixed       |                                                                                      | + | GtoA | 0.1    | 0.4286 | 4  | 4  | [10,20] |
| chr6:21706340   | SOX4    | mixed       |                                                                                      | + | CtoG | 0.1    | 0.1364 | 2  | 2  | [10,22] |
| chr8:10660372   | SOX7    | coding_exon |                                                                                      | - | TtoC | 0.1    | 0.1    | 2  | 2  | [10,10] |
| chr12:52091095  | SP1     | coding_exon | ENST00000327443:VtoA;ENST00000426431:VtoA;                                           | + | TtoC | 0.1176 | 0.1667 | 5  | 2  | [12,17] |
| chr12:52092474  | SP1     | UTR3        |                                                                                      | + | TtoC | 0.1    | 0.2    | 11 | 2  | [10,20] |
| chr12:52092478  | SP1     | UTR3        |                                                                                      | + | CtoA | 0.1    | 0.1    | 3  | 2  | [10,10] |
| chr12:52093657  | SP1     | UTR3        |                                                                                      | + | AtoC | 0.1538 | 0.3    | 2  | 2  | [10,13] |
| chr2:231016021  | SP100   | mixed       |                                                                                      | + | TtoC | 0.125  | 0.2222 | 9  | 2  | [19,32] |
| chr2:230820959  | SP140   | coding_exon | ENST00000343805:NtoS;ENST00000392045:NtoS;                                           | + | AtoG | 0.1154 | 0.1765 | 4  | 2  | [26,52] |
| chr2:230821013  | SP140   | coding_exon | ENST00000343805:GtoA;ENST00000392045:GtoA;                                           | + | GtoC | 0.1702 | 0.2308 | 4  | 2  | [13,47] |
| chr2:230842533  | SP140   | coding_exon | ENST00000343805:EtoG;ENST00000350136:EtoG;ENST00000392045:EtoG;                      | + | AtoG | 0.1    | 0.1333 | 4  | 2  | [10,15] |
| chr2:230821010  | SP140   | coding_exon | ENST00000343805:EtoA;ENST00000392045:EtoA;                                           | + | AtoC | 0.1    | 0.2115 | 6  | 3  | [16,52] |
| chr2:230867268  | SP140   | coding_exon |                                                                                      | + | GtoA | 0.1    | 0.1111 | 7  | 2  | [10,27] |
| chr2:230811861  | SP140   | mixed       |                                                                                      | + | TtoC | 0.1    | 0.1765 | 5  | 2  | [10,18] |
| chr1:118303607  | SPAG17  | UTR3        |                                                                                      | - | AtoG | 0.1    | 0.2308 | 6  | 2  | [10,13] |
| chr1:118303771  | SPAG17  | UTR3        |                                                                                      | - | AtoG | 0.1    | 0.1538 | 4  | 2  | [10,13] |
| chr17:4803353   | SPAG7   | UTR3        |                                                                                      | - | AtoT | 0.1159 | 0.1183 | 3  | 2  | [69,94] |
| chr17:46409499  | SPAG9   | coding_exon | ENST00000262013:NtoK;ENST00000357122:NtoK;ENST00000357804:NtoK;ENST00000357805:NtoK; | - | TtoG | 0.1    | 0.1053 | 2  | 2  | [10,19] |
| chr17:46398403  | SPAG9   | mixed       |                                                                                      | - | TtoG | 0.1    | 0.1    | 2  | 2  | [10,10] |
| chr20:47955361  | SPATA2  | UTR3        |                                                                                      | - | AtoC | 0.1    | 0.1    | 3  | 2  | [10,10] |
| chr12:48170773  | SPATS2  | coding_exon | ENST00000321898:KtoE;ENST00000447889:KtoE;                                           | + | AtoG | 0.1    | 0.3077 | 2  | 2  | [10,13] |
| chr2:201045948  | SPATS2L | coding_exon |                                                                                      | + | AtoC | 0.1    | 0.1    | 2  | 2  | [10,10] |
| chr2:200962241  | SPATS2L | mixed       |                                                                                      | + | TtoC | 0.1    | 0.1429 | 4  | 2  | [10,14] |
| chr3:52717136   | SPCS1   | UTR3        |                                                                                      | + | AtoG | 0.1    | 0.1333 | 6  | 2  | [15,20] |
| chr4:177487849  | SPCS3   | UTR3        |                                                                                      | + | CtoT | 0.1    | 0.1667 | 2  | 2  | [10,12] |
| chr4:177489232  | SPCS3   | UTR3        |                                                                                      | + | AtoG | 0.1529 | 0.6667 | 14 | 12 | [12,85] |
| chr4:177489320  | SPCS3   | UTR3        |                                                                                      | + | AtoG | 0.2667 | 0.4    | 3  | 3  | [10,15] |
| chr4:177489321  | SPCS3   | UTR3        |                                                                                      | + | AtoG | 0.5455 | 0.6364 | 2  | 2  | [11,11] |
| chr2:28876095   | SPDYA   | mixed       |                                                                                      | + | AtoG | 0.1    | 0.1667 | 4  | 2  | [10,12] |
| chr2:28876570   | SPDYA   | mixed       |                                                                                      | + | AtoG | 0.1176 | 0.2857 | 6  | 2  | [14,18] |
| chr2:28877607   | SPDYA   | mixed       |                                                                                      | + | TtoC | 0.1111 | 0.1538 | 5  | 2  | [18,27] |
| chr2:28878852   | SPDYA   | mixed       |                                                                                      | + | AtoG | 0.1    | 0.1875 | 4  | 3  | [10,16] |
| chr2:28926752   | SPDYA   | UTR3        |                                                                                      | + | AtoC | 0.1    | 0.1    | 2  | 2  | [10,10] |
| chr1:16130247   | SPEN    | coding_exon | ENST00000375759:VtoG;                                                                | + | TtoG | 0.1667 | 0.4286 | 4  | 2  | [14,18] |
| chr1:16131219   | SPEN    | coding_exon | ENST00000375759:NtoS;                                                                | + | AtoG | 0.1    | 0.125  | 4  | 2  | [10,16] |
| chr1:16128026   | SPEN    | coding_exon | ENST00000375759:KtoE;                                                                | + | AtoG | 0.1    | 0.1053 | 6  | 2  | [10,19] |
| chr1:16134682   | SPEN    | coding_exon |                                                                                      | + | TtoC | 0.1    | 0.1176 | 3  | 3  | [10,17] |
| chr1:16139027   | SPEN    | UTR3        |                                                                                      | + | AtoG | 0.1    | 0.1    | 6  | 2  | [10,20] |
| chr15:42644127  | SPG11   | coding_exon | ENST00000261866:QtoR;                                                                | - | AtoG | 0.1    | 0.1579 | 7  | 2  | [10,20] |
| chr15:42688050  | SPG11   | coding_exon | ENST00000261866:PtoS;ENST00000427534:PtoS;                                           | - | CtoT | 0.1111 | 0.1333 | 7  | 2  | [10,15] |
| chr15:42694889  | SPG11   | coding_exon | ENST00000261866:LtoP;ENST00000427534:LtoP;                                           | - | TtoC | 0.1111 | 0.1429 | 2  | 2  | [14,18] |
| chr15:42648993  | SPG11   | coding_exon |                                                                                      | - | AtoT | 0.1304 | 0.2    | 4  | 2  | [10,23] |
| chr15:63043098  | SPG21   | coding_exon |                                                                                      | - | CtoT | 0.4355 | 0.5263 | 2  | 2  | [38,62] |
| chr15:63042463  | SPG21   | UTR3        |                                                                                      | - | TtoC | 0.1429 | 0.1818 | 3  | 2  | [11,14] |
| chr15:63042681  | SPG21   | UTR3        |                                                                                      | - | TtoA | 0.1176 | 0.1667 | 4  | 3  | [13,18] |
| chr16:88151154  | SPG7    | UTR3        |                                                                                      | + | TtoA | 0.1053 | 0.1579 | 9  | 4  | [18,28] |
| chr19:53823345  | SPHK2   | mixed       |                                                                                      | + | GtoA | 0.1    | 0.1818 | 6  | 2  | [10,11] |
| chr19:53825196  | SPHK2   | mixed       |                                                                                      | + | AtoC | 0.1    | 0.1    | 2  | 2  | [10,10] |
| chr19:55624056  | SPIB    | UTR3        |                                                                                      | + | TtoC | 0.1176 | 0.2    | 6  | 3  | [10,35] |
| chr19:55624061  | SPIB    | UTR3        |                                                                                      | + | GtoA | 0.1    | 0.2143 | 2  | 2  | [14,20] |
| chr9:90281292   | SPIN1   | UTR3        |                                                                                      | + | TtoG | 0.1    | 0.1    | 2  | 2  | [10,10] |
| chr16:28894164  | SPNS1   | mixed       |                                                                                      | + | TtoG | 0.1    | 0.2143 | 3  | 2  | [10,14] |
| chr17:45032054  | SPOP    | UTR3        |                                                                                      | - | TtoC | 0.1053 | 0.119  | 7  | 3  | [17,42] |
| chr17:45032379  | SPOP    | UTR3        |                                                                                      | - | GtoA | 0.1176 | 0.1212 | 7  | 2  | [17,33] |
| chr12:51754766  | SPRYD3  | coding_exon | ENST00000301463:CtoW;                                                                | - | TtoG | 0.15   | 0.786  | 3  | 2  | [20,28] |
| chr12:51745167  | SPRYD3  | UTR3        |                                                                                      | - | TtoA | 0.1333 | 0.1818 | 4  | 2  | [11,15] |
| chr9:130368914  | SPTAN1  | mixed       |                                                                                      | + | GtoT | 0.1    | 0.1667 | 2  | 2  | [10,12] |
| chr2:54730317   | SPTBN1  | coding_exon | ENST0000033896:VtoG;ENST00000356805:VtoG;                                            | + | TtoG | 0.1    | 0.1538 | 2  | 2  | [10,13] |
| chr2:54749427   | SPTBN1  | UTR3        |                                                                                      | + | AtoG | 0.1    | 0.2    | 6  | 3  | [16,20] |
| chr2:54749429   | SPTBN1  | UTR3        |                                                                                      | + | AtoG | 0.1053 | 0.1538 | 6  | 3  | [14,19] |
| chr2:54749843   | SPTBN1  | UTR3        |                                                                                      | + | TtoA | 0.1    | 0.1875 | 8  | 3  | [11,16] |
| chr9:93834113   | SPTLC1  | UTR3        |                                                                                      | - | TtoC | 0.1    | 0.1    | 3  | 2  | [10,10] |
| chr14:77043171  | SPTLC2  | UTR3        |                                                                                      | - | AtoT | 0.1    | 0.1176 | 4  | 2  | [10,17] |
| chr11:18584633  | SPTY2D1 | UTR3        |                                                                                      | - | GtoA | 0.3    | 0.3077 | 2  | 2  | [10,13] |
| chr8:126088879  | SQLE    | coding_exon | ENST00000265896:QtoE;                                                                | + | CtoG | 0.3    | 0.5    | 3  | 3  | [10,14] |
| chr8:126088873  | SQLE    | coding_exon | ENST00000265896:GtoV;                                                                | + | GtoT | 0.3    | 0.6364 | 8  | 8  | [10,21] |
| chr15:43770696  | SQRDL   | UTR3        |                                                                                      | + | TtoA | 0.1    | 0.1905 | 4  | 2  | [10,21] |
| chr3:144228695  | SR140   | coding_exon | ENST00000319822:LtoP;ENST00000397933:LtoP;ENST00000429264:LtoP;ENST00000429265:LtoP; | + | TtoC | 0.1    | 0.1    | 2  | 2  | [10,10] |
| chr3:144222915  | SR140   | mixed       |                                                                                      | + | GtoT | 0.1    | 0.15   | 3  | 2  | [10,20] |
| chr3:144258183  | SR140   | UTR3        |                                                                                      | + | TtoC | 0.1    | 0.1    | 3  | 2  | [10,10] |
| chr2:45499048   | SRBD1   | coding_exon | ENST00000263736:FtoV;                                                                | - | TtoG | 0.1    | 0.1176 | 3  | 2  | [10,18] |
| chr20:35465447  | SRC     | UTR3        |                                                                                      | + | TtoC | 0.1    | 0.1    | 2  | 2  | [10,10] |

|                 |            |             |                                                                                      |   |      |        |        |    |   |          |
|-----------------|------------|-------------|--------------------------------------------------------------------------------------|---|------|--------|--------|----|---|----------|
| chr20:35467045  | SRC        | UTR3        |                                                                                      | + | TtoC | 0.1176 | 0.1818 | 3  | 2 | [11,17]  |
| chr20:35467047  | SRC        | UTR3        |                                                                                      | + | CtoT | 0.1    | 0.1429 | 2  | 2 | [10,14]  |
| chr5:6705099    | SRD5A1     | coding_exon |                                                                                      | + | AtoG | 0.1    | 0.1    | 3  | 2 | [10,10]  |
| chr6:43255121   | SRF        | UTR3        |                                                                                      | + | AtoG | 0.1    | 0.1    | 2  | 2 | [10,10]  |
| chr6:43255183   | SRF        | UTR3        |                                                                                      | + | TtoC | 0.1    | 0.1    | 2  | 2 | [10,10]  |
| chr6:43256221   | SRF        | UTR3        |                                                                                      | + | TtoA | 0.1    | 0.1667 | 7  | 4 | [10,25]  |
| chr5:121384079  | SRFBP1     | coding_exon |                                                                                      | + | AtoG | 0.1    | 0.1818 | 2  | 2 | [10,11]  |
| chr3:9401522    | SRGAP3     | mixed       |                                                                                      | - | AtoT | 0.1    | 0.2    | 2  | 2 | [10,10]  |
| chr10:70534516  | SRGN       | UTR3        |                                                                                      | + | TtoA | 0.1053 | 0.1789 | 16 | 7 | [57,364] |
| chr10:70534567  | SRGN       | UTR3        |                                                                                      | + | AtoG | 0.1    | 0.2667 | 5  | 3 | [10,15]  |
| chr7:87673614   | SRI        | UTR3        |                                                                                      | - | TtoG | 0.1    | 0.2727 | 3  | 2 | [10,11]  |
| chr1:11037245   | SRM        | UTR3        |                                                                                      | - | TtoC | 0.1091 | 0.1111 | 8  | 2 | [28,58]  |
| chr1:11037319   | SRM        | UTR3        |                                                                                      | - | AtoC | 0.1047 | 0.2424 | 4  | 3 | [76,100] |
| chr15:38115530  | SRP14      | UTR3        |                                                                                      | - | CtoA | 0.1    | 0.1429 | 6  | 2 | [10,14]  |
| chr5:112226171  | SRP19      | coding_exon | ENST00000282999:itoV;ENST00000445150:itoV;                                           | + | AtoG | 0.1    | 0.1176 | 5  | 2 | [11,17]  |
| chr5:112231330  | SRP19      | UTR3        |                                                                                      | + | TtoA | 0.1    | 0.2222 | 3  | 2 | [10,20]  |
| chr14:34568095  | SRP54      | coding_exon | ENST00000216774:FtoI;                                                                | + | TtoA | 0.1034 | 0.1429 | 10 | 3 | [28,33]  |
| chr6:35946141   | SRPK1      | mixed       |                                                                                      | - | TtoC | 0.1    | 0.1786 | 5  | 2 | [10,28]  |
| chr7:104574277  | SRPK2      | coding_exon | ENST00000357311:EtoG;ENST00000393651:EtoG;ENST00000457338:EtoG;ENST00000457338:EtoG; | - | AtoG | 0.1    | 0.1667 | 7  | 3 | [10,24]  |
| chr7:104553953  | SRPK2      | coding_exon |                                                                                      | - | TtoC | 0.1    | 0.1538 | 6  | 3 | [10,13]  |
| chr7:104570960  | SRPK2      | coding_exon |                                                                                      | - | GtoA | 0.1    | 0.1034 | 2  | 2 | [10,29]  |
| chr7:104539879  | SRPK2      | mixed       |                                                                                      | - | AtoG | 0.1    | 0.1    | 3  | 2 | [10,10]  |
| chr7:104541012  | SRPK2      | mixed       |                                                                                      | - | TtoC | 0.1176 | 0.1818 | 8  | 3 | [11,17]  |
| chr11:125638087 | SRPR       | UTR3        |                                                                                      | - | AtoG | 0.1176 | 0.1875 | 10 | 5 | [16,54]  |
| chr17:2173206   | SRR        | coding_exon |                                                                                      | + | TtoC | 0.1    | 0.1176 | 3  | 2 | [10,34]  |
| chr22:25216103  | SRRD       | coding_exon | ENST00000215917:StoP;                                                                | + | TtoC | 0.1    | 0.1429 | 3  | 2 | [10,14]  |
| chr16:2753090   | SRRM2      | coding_exon | ENST00000301740:StoP;ENST00000382301:StoP;                                           | + | TtoC | 0.1429 | 0.1538 | 2  | 2 | [13,14]  |
| chr16:2761381   | SRRM2      | UTR3        |                                                                                      | + | TtoA | 0.1    | 0.1429 | 11 | 5 | [16,37]  |
| chr20:575645    | SRXN1      | UTR3        |                                                                                      | - | AtoG | 0.1    | 0.1    | 2  | 2 | [10,10]  |
| chr7:141096703  | SSBP1      | UTR3        |                                                                                      | + | AtoG | 0.1071 | 0.3171 | 11 | 8 | [13,43]  |
| chr7:141084636  | SSBP1      | UTR5        |                                                                                      | + | AtoG | 0.1    | 0.1176 | 3  | 2 | [17,20]  |
| chr12:107705168 | SSH1       | UTR3        |                                                                                      | - | TtoC | 0.1176 | 0.125  | 3  | 2 | [16,17]  |
| chr6:7243173    | SSR1       | coding_exon | ENST00000244763:QtoH;ENST00000397511:QtoH;ENST00000462112:QtoH;ENST00000462112:QtoH; | - | AtoC | 0.1538 | 0.5526 | 4  | 3 | [13,68]  |
| chr6:7232801    | SSR1       | mixed       |                                                                                      | - | TtoG | 0.1765 | 0.2222 | 4  | 2 | [10,17]  |
| chr6:7234118    | SSR1       | mixed       |                                                                                      | - | TtoA | 0.1579 | 0.1818 | 8  | 2 | [11,19]  |
| chr6:7234323    | SSR1       | mixed       |                                                                                      | - | TtoG | 0.1    | 0.1429 | 4  | 2 | [10,14]  |
| chr6:7234754    | SSR1       | mixed       |                                                                                      | - | AtoT | 0.1111 | 0.1429 | 6  | 3 | [14,18]  |
| chr6:7234755    | SSR1       | mixed       |                                                                                      | - | GtoA | 0.1111 | 0.1538 | 2  | 2 | [13,18]  |
| chr6:7234957    | SSR1       | mixed       |                                                                                      | - | GtoC | 0.1053 | 0.8636 | 10 | 9 | [19,148] |
| chr1:154245469  | SSR2       | UTR3        |                                                                                      | - | AtoG | 0.1034 | 0.2    | 3  | 3 | [10,29]  |
| chr3:157741562  | SSR3       | UTR3        |                                                                                      | - | AtoG | 0.1429 | 0.2    | 4  | 3 | [10,21]  |
| chr3:157742482  | SSR3       | UTR3        |                                                                                      | - | TtoC | 0.1    | 0.2727 | 4  | 2 | [10,22]  |
| chr3:157743528  | SSR3       | UTR3        |                                                                                      | - | TtoG | 0.1034 | 0.1071 | 6  | 2 | [28,32]  |
| chr11:56850049  | SSRP1      | UTR3        |                                                                                      | - | TtoC | 0.1    | 0.2    | 2  | 2 | [10,20]  |
| chr11:56850051  | SSRP1      | UTR3        |                                                                                      | - | AtoG | 0.1    | 0.1333 | 4  | 3 | [10,20]  |
| chr22:39576817  | ST13       | coding_exon | ENST00000216218:VtoL;                                                                | - | GtoT | 0.125  | 0.1579 | 3  | 2 | [16,19]  |
| chr22:39566639  | ST13       | coding_exon | ENST00000216218:TtoS;                                                                | - | AtoT | 0.1    | 0.1    | 3  | 2 | [10,10]  |
| chr22:39576789  | ST13       | coding_exon | ENST00000216218:Sto*;                                                                | - | CtoA | 0.1    | 0.1    | 2  | 2 | [10,10]  |
| chr22:39556794  | ST13       | coding_exon | ENST00000216218:QtoR;                                                                | - | AtoG | 0.1    | 0.1622 | 8  | 4 | [18,37]  |
| chr22:39570797  | ST13       | coding_exon | ENST00000216218:NtoY;                                                                | - | AtoT | 0.1818 | 0.2    | 2  | 2 | [10,11]  |
| chr22:39556845  | ST13       | coding_exon | ENST00000216218:KtoR;                                                                | - | AtoG | 0.1    | 0.2    | 8  | 4 | [10,18]  |
| chr22:39556846  | ST13       | coding_exon | ENST00000216218:KtoE;                                                                | - | AtoG | 0.1    | 0.2222 | 11 | 5 | [10,18]  |
| chr22:39576820  | ST13       | coding_exon | ENST00000216218:KtoE;                                                                | - | AtoG | 0.1    | 0.1    | 9  | 2 | [10,20]  |
| chr22:39556849  | ST13       | coding_exon | ENST00000216218:itoV;                                                                | - | AtoG | 0.2    | 0.2    | 7  | 2 | [10,16]  |
| chr22:39561775  | ST13       | coding_exon | ENST00000216218:itoV;                                                                | - | AtoG | 0.1765 | 0.8    | 2  | 2 | [10,17]  |
| chr22:39556843  | ST13       | coding_exon | ENST00000216218:EtoK;                                                                | - | GtoA | 0.1111 | 0.2    | 4  | 2 | [11,19]  |
| chr22:39556852  | ST13       | coding_exon | ENST00000216218:EtoK;                                                                | - | GtoA | 0.1111 | 0.1667 | 13 | 4 | [18,24]  |
| chr22:39555618  | ST13       | coding_exon | ENST00000216218:Eto*;                                                                | - | GtoT | 0.1053 | 0.1111 | 5  | 2 | [19,27]  |
| chr22:39566612  | ST13       | coding_exon | ENST00000216218:DtoH;                                                                | - | GtoC | 0.1    | 0.2    | 2  | 2 | [10,15]  |
| chr22:39561577  | ST13       | coding_exon | ENST00000216218:CtoR;                                                                | - | TtoC | 0.1538 | 0.2222 | 2  | 2 | [10,13]  |
| chr22:39558575  | ST13       | coding_exon | ENST00000216218:CtoG;                                                                | - | TtoG | 0.1333 | 0.2222 | 2  | 2 | [10,15]  |
| chr22:39561567  | ST13       | coding_exon | ENST00000216218:Atod;                                                                | - | CtoA | 0.1    | 0.2308 | 2  | 2 | [10,13]  |
| chr22:39556790  | ST13       | coding_exon |                                                                                      | - | GtoA | 0.1053 | 0.1765 | 5  | 3 | [18,19]  |
| chr22:39556853  | ST13       | coding_exon |                                                                                      | - | AtoG | 0.1    | 0.2917 | 10 | 4 | [21,30]  |
| chr22:39558576  | ST13       | coding_exon |                                                                                      | - | CtoA | 0.1538 | 0.2    | 4  | 3 | [10,13]  |
| chr22:39561776  | ST13       | coding_exon |                                                                                      | - | CtoT | 0.125  | 0.8    | 2  | 2 | [10,17]  |
| chr22:39570792  | ST13       | coding_exon |                                                                                      | - | GtoA | 0.2    | 0.6364 | 4  | 3 | [10,18]  |
| chr22:39574251  | ST13       | coding_exon |                                                                                      | - | TtoC | 0.1    | 0.1111 | 3  | 2 | [10,10]  |
| chr22:39576803  | ST13       | coding_exon |                                                                                      | - | TtoC | 0.1    | 0.1    | 6  | 2 | [10,20]  |
| chr22:39576824  | ST13       | coding_exon |                                                                                      | - | TtoG | 0.1053 | 0.2    | 3  | 2 | [10,19]  |
| chr22:39582470  | ST13       | coding_exon |                                                                                      | - | CtoT | 0.1333 | 0.35   | 2  | 2 | [15,20]  |
| chr16:68971437  | ST3GAL2    | UTR3        |                                                                                      | - | TtoG | 0.1    | 0.2143 | 2  | 2 | [30,42]  |
| chr1:44168563   | ST3GAL3    | UTR3        |                                                                                      | + | AtoG | 0.1    | 0.2143 | 3  | 2 | [10,14]  |
| chr3:99975517   | ST3GAL6    | coding_exon | ENST00000265261:KtoR;ENST00000394162:NtoS;ENST00000468553:KtoR;ENST00000468553:KtoR; | + | AtoG | 0.1    | 0.1333 | 2  | 2 | [10,15]  |
| chr3:99989678   | ST3GAL6    | coding_exon |                                                                                      | + | TtoA | 0.1    | 0.1    | 3  | 2 | [10,10]  |
| chr3:188277458  | ST6GAL1    | UTR3        |                                                                                      | + | GtoT | 0.1111 | 0.2667 | 7  | 5 | [12,20]  |
| chr3:188279021  | ST6GAL1    | UTR3        |                                                                                      | + | TtoC | 0.1053 | 0.1333 | 3  | 2 | [15,19]  |
| chr9:129687425  | ST6GALNAC6 | UTR3        |                                                                                      | - | TtoC | 0.1176 | 0.3636 | 6  | 2 | [11,17]  |
| chr7:116657174  | ST7        | UTR3        |                                                                                      | + | AtoC | 0.1    | 0.1111 | 3  | 2 | [18,40]  |
| chr5:100249964  | ST8SIA4    | coding_exon | ENST00000231461:StoN;ENST00000451528:StoN;                                           | - | GtoA | 0.1    | 0.2    | 2  | 2 | [10,16]  |
| chr5:100175732  | ST8SIA4    | coding_exon |                                                                                      | - | TtoG | 0.1667 | 0.1667 | 3  | 2 | [12,18]  |
| chr3:52533448   | STAB1      | UTR3        |                                                                                      | + | AtoG | 0.2941 | 0.3333 | 3  | 3 | [16,18]  |
| chr2:73943437   | STAMBIP    | UTR3        |                                                                                      | + | AtoG | 0.1111 | 0.1176 | 8  | 3 | [17,18]  |
| chr2:73909693   | STAMBIP    | UTR5        |                                                                                      | + | GtoA | 0.1    | 0.1    | 2  | 2 | [10,10]  |
| chr10:90672089  | STAMBPL1   | coding_exon |                                                                                      | + | GtoA | 0.1    | 0.1    | 2  | 2 | [10,10]  |
| chr4:68155059   | STAP1      | UTR3        |                                                                                      | + | TtoG | 0.1    | 0.1    | 2  | 2 | [10,10]  |
| chr19:4276419   | STAP2      | coding_exon | ENST00000314714:PtoR;ENST00000424810:PtoR;                                           | - | CtoG | 0.1    | 0.1    | 4  | 2 | [10,10]  |
| chr11:72146577  | STARD10    | coding_exon | ENST00000334805:KtoE;                                                                | - | AtoG | 0.1429 | 0.2    | 2  | 2 | [10,14]  |
| chr11:72181570  | STARD10    | UTR5        |                                                                                      | - | CtoA | 0.2727 | 0.6    | 2  | 2 | [10,11]  |
| chr7:38220534   | STARD3NL   | coding_exon | ENST0000009041:YtoN;ENST00000396013:YtoN;ENST00000434197:YtoN;                       | + | TtoA | 0.1    | 0.1053 | 3  | 2 | [10,19]  |
| chr5:110864628  | STARD4     | coding_exon | ENST00000296632:VtoA;ENST00000455172:VtoA;                                           | - | TtoC | 0.1    | 0.1875 | 5  | 2 | [10,16]  |
| chr5:110861974  | STARD4     | UTR3        |                                                                                      | - | TtoG | 0.1    | 0.1818 | 10 | 4 | [10,21]  |
| chr2:96214907   | STARD7     | UTR3        |                                                                                      | - | TtoC | 0.1111 | 0.15   | 4  | 2 | [20,27]  |
| chr2:96215657   | STARD7     | UTR3        |                                                                                      | - | CtoG | 0.1    | 0.1    | 3  | 2 | [10,10]  |
| chr15:40774217  | STARD9     | coding_exon | ENST00000290607:YtoN;                                                                | + | TtoA | 1      | 1      | 5  | 5 | [11,15]  |
| chr15:40774218  | STARD9     | coding_exon | ENST00000290607:YtoC;                                                                | + | AtoG | 1      | 1      | 6  | 6 | [10,15]  |

|                 |          |             |                                                                         |   |      |        |        |    |    |         |
|-----------------|----------|-------------|-------------------------------------------------------------------------|---|------|--------|--------|----|----|---------|
| chr15:40799948  | STARD9   | UTR3        |                                                                         | + | TtoG | 0.1    | 0.1    | 3  | 2  | [10,10] |
| chr2:191562622  | STAT1    | coding_exon | ENST00000361099:LtoR;ENST00000392322:LtoR;ENST00000392323:LtoR;ENST000  | - | TtoG | 0.1053 | 0.2222 | 2  | 2  | [10,19] |
| chr2:191548543  | STAT1    | mixed       |                                                                         | - | TtoA | 0.1    | 0.1    | 4  | 2  | [10,10] |
| chr2:191548548  | STAT1    | mixed       |                                                                         | - | TtoC | 0.1    | 0.1333 | 3  | 2  | [10,15] |
| chr12:55031383  | STAT2    | coding_exon | ENST00000314128:NtoH;                                                   | - | AtoC | 0.1    | 0.2    | 4  | 2  | [10,10] |
| chr12:55036254  | STAT2    | coding_exon | ENST00000314128:GtoC;ENST00000418572:GtoC;                              | - | GtoT | 0.125  | 0.125  | 2  | 2  | [16,32] |
| chr12:55023940  | STAT2    | coding_exon |                                                                         | - | AtoC | 0.1053 | 0.1053 | 3  | 2  | [19,19] |
| chr12:55029217  | STAT2    | coding_exon |                                                                         | - | TtoG | 0.1    | 0.15   | 2  | 2  | [20,20] |
| chr12:55040109  | STAT2    | UTR5        |                                                                         | - | GtoT | 0.1282 | 0.2692 | 5  | 3  | [16,39] |
| chr17:37270748  | STAT3    | UTR3        |                                                                         | - | CtoA | 0.1111 | 0.3182 | 12 | 7  | [11,22] |
| chr17:37270749  | STAT3    | UTR3        |                                                                         | - | GtoC | 0.1    | 0.3043 | 9  | 5  | [10,23] |
| chr17:37604972  | STAT5B   | UTR3        |                                                                         | - | AtoG | 0.1053 | 0.1333 | 7  | 2  | [15,21] |
| chr17:37605808  | STAT5B   | UTR3        |                                                                         | - | AtoG | 0.1    | 0.1333 | 3  | 2  | [10,15] |
| chr17:37607201  | STAT5B   | UTR3        |                                                                         | - | TtoA | 0.125  | 0.1818 | 7  | 2  | [11,17] |
| chr12:55784520  | STAT6    | coding_exon | ENST00000300134:QtoH;ENST00000454075:QtoH;                              | - | GtoT | 0.1053 | 0.1818 | 3  | 3  | [11,19] |
| chr12:55784517  | STAT6    | coding_exon |                                                                         | - | CtoT | 0.1667 | 0.2609 | 3  | 3  | [12,23] |
| chr20:47163518  | STAU1    | UTR3        |                                                                         | - | TtoA | 0.1333 | 0.1818 | 9  | 3  | [11,16] |
| chr20:47163519  | STAU1    | UTR3        |                                                                         | - | AtoG | 0.1304 | 0.2    | 10 | 2  | [24,26] |
| chr8:74814651   | STAU2    | UTR5        |                                                                         | - | CtoA | 0.1    | 0.1    | 2  | 2  | [10,10] |
| chr5:172676993  | STC2     | UTR3        |                                                                         | - | TtoG | 0.1    | 0.1    | 3  | 2  | [10,20] |
| chr1:47488521   | STIL     | UTR3        |                                                                         | - | AtoG | 0.1    | 0.1538 | 4  | 3  | [10,17] |
| chr1:47488535   | STIL     | UTR3        |                                                                         | - | AtoG | 0.1    | 0.1429 | 9  | 3  | [14,20] |
| chr1:47488759   | STIL     | UTR3        |                                                                         | - | TtoC | 0.1    | 0.1538 | 4  | 2  | [10,13] |
| chr11:4070486   | STIM1    | UTR3        |                                                                         | + | AtoC | 0.12   | 0.2    | 4  | 3  | [10,25] |
| chr5:171403227  | STK10    | UTR3        |                                                                         | - | TtoA | 0.1    | 0.6    | 5  | 5  | [10,22] |
| chr19:1169495   | STK11    | coding_exon | ENST00000326873:KtoE;ENST00000405031:KtoE;                              | + | AtoG | 0.1    | 0.125  | 4  | 2  | [10,16] |
| chr2:196709057  | STK17B   | UTR3        |                                                                         | - | TtoG | 0.2222 | 0.4167 | 2  | 2  | [10,12] |
| chr2:242083263  | STK25    | UTR3        |                                                                         | - | TtoC | 0.1143 | 0.125  | 4  | 2  | [16,38] |
| chr20:2076920   | STK35    | UTR3        |                                                                         | + | CtoT | 0.1    | 0.1    | 3  | 2  | [10,10] |
| chr6:36572509   | STK38    | coding_exon |                                                                         | - | AtoG | 0.1    | 0.1    | 3  | 2  | [10,10] |
| chr12:27368333  | STK38L   | UTR3        |                                                                         | + | AtoG | 0.1111 | 0.1579 | 7  | 4  | [13,19] |
| chr20:43139440  | STK4     | UTR3        |                                                                         | + | GtoC | 0.1    | 0.1538 | 5  | 2  | [10,13] |
| chr1:36579878   | STK40    | UTR3        |                                                                         | - | TtoG | 0.1333 | 0.2    | 3  | 2  | [10,15] |
| chr1:26099639   | STMN1    | mixed       |                                                                         | - | AtoG | 0.1053 | 0.1143 | 10 | 2  | [19,35] |
| chr1:26099643   | STMN1    | mixed       |                                                                         | - | TtoC | 0.125  | 0.1429 | 8  | 2  | [16,22] |
| chr9:123143263  | STOM     | UTR3        |                                                                         | - | GtoA | 0.1    | 0.1111 | 4  | 2  | [10,18] |
| chr9:35089897   | STOML2   | UTR3        |                                                                         | - | AtoG | 0.1    | 0.2    | 7  | 5  | [10,30] |
| chr9:35089901   | STOML2   | UTR3        |                                                                         | - | TtoC | 0.1    | 0.1818 | 10 | 2  | [10,11] |
| chr2:201960891  | STRADB   | mixed       |                                                                         | + | AtoG | 0.1    | 0.1176 | 2  | 2  | [10,17] |
| chr9:124911853  | STRBP    | mixed       |                                                                         | - | CtoA | 0.1    | 0.1    | 3  | 2  | [10,10] |
| chr9:124927236  | STRBP    | UTR3        |                                                                         | - | CtoA | 0.1    | 0.1053 | 2  | 2  | [10,19] |
| chr19:51923097  | STRN4    | coding_exon |                                                                         | - | TtoC | 0.1    | 0.1053 | 2  | 2  | [19,20] |
| chr19:51914761  | STRN4    | UTR3        |                                                                         | - | TtoC | 0.1    | 0.1304 | 4  | 2  | [10,23] |
| chr19:51914873  | STRN4    | UTR3        |                                                                         | - | TtoC | 0.1333 | 0.1538 | 3  | 2  | [13,16] |
| chr3:31640336   | STT3B    | coding_exon | ENST00000295770:LtoP;                                                   | + | TtoC | 0.1    | 0.1    | 7  | 2  | [20,20] |
| chr3:31641527   | STT3B    | coding_exon |                                                                         | + | TtoC | 0.1081 | 0.1481 | 3  | 2  | [27,37] |
| chr3:31654084   | STT3B    | UTR3        |                                                                         | + | TtoC | 0.1    | 0.1333 | 4  | 2  | [10,15] |
| chr1:28021329   | STX12    | coding_exon | ENST00000373939:KtoE;ENST00000373943:KtoE;                              | + | AtoG | 0.1    | 0.2    | 3  | 2  | [10,11] |
| chr1:28022441   | STX12    | UTR3        |                                                                         | + | TtoA | 0.1    | 0.1818 | 2  | 2  | [10,11] |
| chr1:28023332   | STX12    | UTR3        |                                                                         | + | AtoG | 0.1    | 0.1333 | 2  | 2  | [10,15] |
| chr20:56686042  | STX16    | mixed       |                                                                         | + | TtoA | 0.1    | 0.2    | 6  | 2  | [10,11] |
| chr20:56686362  | STX16    | mixed       |                                                                         | + | TtoG | 0.1053 | 0.1818 | 11 | 6  | [11,26] |
| chr9:101772026  | STX17    | UTR3        |                                                                         | + | TtoG | 0.1    | 0.1    | 2  | 2  | [10,10] |
| chr4:4472476    | STX18    | UTR3        |                                                                         | - | AtoC | 0.1    | 0.25   | 5  | 3  | [20,22] |
| chr11:62349350  | STX5     | coding_exon | ENST00000294179:VtoA;ENST00000377897:VtoA;ENST00000394690:VtoA;         | - | TtoC | 0.125  | 0.25   | 4  | 2  | [12,16] |
| chr11:62348609  | STX5     | coding_exon |                                                                         | - | TtoC | 0.1    | 0.125  | 2  | 2  | [10,16] |
| chr1:179209341  | STX6     | UTR3        |                                                                         | - | AtoG | 0.1667 | 0.1818 | 6  | 2  | [11,12] |
| chr6:132821017  | STX7     | UTR3        |                                                                         | - | TtoC | 0.1111 | 0.1111 | 9  | 3  | [18,28] |
| chr6:132821264  | STX7     | UTR3        |                                                                         | - | TtoA | 0.1    | 0.1    | 2  | 2  | [10,10] |
| chr7:75463606   | STYXL1   | UTR3        |                                                                         | - | TtoA | 0.1111 | 0.125  | 2  | 2  | [16,19] |
| chr2:84530347   | SUCLG1   | coding_exon |                                                                         | - | TtoC | 0.1111 | 0.15   | 6  | 3  | [27,61] |
| chr2:84504190   | SUCLG1   | UTR3        |                                                                         | - | AtoG | 0.1    | 0.1538 | 7  | 2  | [10,13] |
| chr3:67651413   | SUCLG2   | coding_exon | ENST00000307227:QtoR;ENST00000492795:QtoR;ENST00000493112:QtoR;         | - | AtoG | 0.1053 | 0.1111 | 2  | 2  | [18,19] |
| chr12:117338634 | SUDS3    | UTR3        |                                                                         | + | AtoG | 0.1    | 0.1538 | 4  | 2  | [10,13] |
| chr17:70682473  | SUMO2    | coding_exon | ENST00000420826:QtoR;                                                   | - | AtoG | 0.1    | 0.303  | 12 | 10 | [16,43] |
| chr17:70682470  | SUMO2    | coding_exon | ENST00000420826:PtoQ;                                                   | - | CtoA | 0.1    | 0.1333 | 6  | 2  | [10,15] |
| chr17:70682467  | SUMO2    | coding_exon | ENST00000420826:ItoN;                                                   | - | TtoA | 0.1    | 0.1818 | 5  | 2  | [10,12] |
| chr17:70682477  | SUMO2    | coding_exon | ENST00000420826:GtoR;                                                   | - | GtoA | 0.1034 | 0.1739 | 5  | 3  | [18,58] |
| chr17:70688860  | SUMO2    | coding_exon | ENST00000314523:NtoD;ENST00000420826:NtoD;                              | - | AtoG | 0.1538 | 0.5    | 6  | 5  | [11,14] |
| chr17:70688861  | SUMO2    | coding_exon | ENST00000314523:EtoD;ENST00000420826:EtoD;                              | - | GtoT | 0.1111 | 0.129  | 5  | 2  | [10,33] |
| chr17:70682469  | SUMO2    | coding_exon |                                                                         | - | AtoG | 0.1316 | 0.1429 | 7  | 3  | [14,38] |
| chr17:70682472  | SUMO2    | coding_exon |                                                                         | - | AtoG | 0.1053 | 0.1333 | 4  | 2  | [16,19] |
| chr17:70688759  | SUMO2    | coding_exon |                                                                         | - | TtoC | 0.1    | 0.1818 | 5  | 3  | [10,24] |
| chr17:70675650  | SUMO2    | UTR3        |                                                                         | - | CtoA | 0.1176 | 0.125  | 3  | 2  | [17,24] |
| chr17:70690580  | SUMO2    | UTR5        |                                                                         | - | TtoG | 0.1    | 0.1034 | 4  | 2  | [21,30] |
| chr17:70690582  | SUMO2    | UTR5        |                                                                         | - | GtoT | 0.1111 | 0.2105 | 5  | 4  | [17,20] |
| chr19:44655806  | SUPT5H   | coding_exon | ENST00000359191:QtoH;ENST00000378524:QtoH;ENST00000402194:QtoH;ENST0    | + | GtoT | 0.1    | 0.1    | 3  | 2  | [10,10] |
| chr19:44651248  | SUPT5H   | coding_exon |                                                                         | + | TtoC | 0.1    | 0.1765 | 3  | 2  | [10,17] |
| chr17:24037503  | SUPT6H   | coding_exon | ENST00000314616:LtoQ;                                                   | + | TtoA | 0.1    | 0.1176 | 5  | 2  | [17,30] |
| chr2:27729555   | SUPT7L   | UTR3        |                                                                         | - | AtoG | 0.1    | 0.1    | 4  | 2  | [10,10] |
| chr9:135208500  | SURF1    | UTR3        |                                                                         | - | TtoC | 0.1    | 0.1333 | 7  | 3  | [10,15] |
| chr9:135218264  | SURF4    | UTR3        |                                                                         | - | AtoG | 0.1154 | 0.1333 | 5  | 2  | [15,26] |
| chr9:135219393  | SURF4    | UTR3        |                                                                         | - | AtoG | 0.1071 | 0.1667 | 8  | 4  | [24,92] |
| chr9:135187707  | SURF6    | UTR3        |                                                                         | - | AtoG | 0.1111 | 0.1818 | 13 | 3  | [18,33] |
| chr9:113843279  | SUSD1    | UTR3        |                                                                         | - | TtoC | 0.1    | 0.2    | 3  | 2  | [10,10] |
| chr10:14978886  | SUV39H2  | coding_exon | ENST00000313519:WtoC;ENST00000354919:WtoC;ENST00000378325:WtoC;ENST     | + | GtoT | 0.1    | 0.1    | 2  | 2  | [10,10] |
| chr10:14984422  | SUV39H2  | coding_exon | ENST00000313519:ItoV;ENST00000354919:ItoV;ENST00000378325:ItoV;ENST0000 | + | AtoG | 0.1    | 0.5    | 7  | 6  | [10,13] |
| chr10:14983226  | SUV39H2  | coding_exon | ENST00000313519:ItoK;ENST00000354919:ItoK;ENST00000378325:ItoK;ENST0000 | + | TtoA | 0.1    | 0.2    | 4  | 3  | [10,16] |
| chr10:14984472  | SUV39H2  | coding_exon |                                                                         | + | AtoT | 0.1364 | 0.2105 | 8  | 3  | [17,22] |
| chr11:67689887  | SUV420H1 | mixed       |                                                                         | - | TtoC | 0.1    | 0.1818 | 4  | 2  | [10,11] |
| chr17:27345710  | SUZ12    | coding_exon |                                                                         | + | TtoC | 0.1    | 0.1    | 2  | 2  | [10,10] |
| chr17:27351751  | SUZ12    | UTR3        |                                                                         | + | CtoA | 0.1    | 0.1333 | 2  | 2  | [10,15] |
| chr11:22801178  | SVIP     | UTR3        |                                                                         | - | TtoG | 0.1    | 0.1    | 8  | 3  | [10,10] |
| chr11:9728955   | SWAP70   | UTR3        |                                                                         | + | TtoA | 0.1042 | 0.1231 | 8  | 4  | [19,66] |
| chr11:9729191   | SWAP70   | UTR3        |                                                                         | + | CtoA | 0.1667 | 0.2727 | 8  | 2  | [11,12] |
| chr11:9729192   | SWAP70   | UTR3        |                                                                         | + | TtoG | 0.1    | 0.1818 | 4  | 2  | [10,11] |

|                 |          |             |                                                                                      |   |      |        |        |    |    |          |
|-----------------|----------|-------------|--------------------------------------------------------------------------------------|---|------|--------|--------|----|----|----------|
| chr11:9729479   | SWAP70   | UTR3        |                                                                                      | + | GtoA | 0.1053 | 0.1333 | 2  | 2  | [15,19]  |
| chr11:9729846   | SWAP70   | UTR3        |                                                                                      | + | AtoG | 0.1    | 0.1176 | 8  | 3  | [10,17]  |
| chr1:25422288   | SYF2     | UTR3        |                                                                                      | - | AtoG | 0.1    | 0.1333 | 5  | 2  | [15,20]  |
| chr9:92699607   | SYK      | UTR3        |                                                                                      | + | TtoG | 0.1    | 0.1765 | 6  | 3  | [10,17]  |
| chr9:92700130   | SYK      | UTR3        |                                                                                      | + | TtoC | 0.72   | 0.8421 | 3  | 2  | [19,25]  |
| chr6:86377191   | SYNCRIP  | UTR3        |                                                                                      | - | TtoA | 0.1    | 0.1429 | 3  | 2  | [10,14]  |
| chr14:63666304  | SYNE2    | mixed       |                                                                                      | + | AtoG | 0.1    | 0.1818 | 3  | 2  | [10,11]  |
| chr14:63762251  | SYNE2    | UTR3        |                                                                                      | + | TtoC | 0.1    | 0.1053 | 2  | 2  | [10,19]  |
| chr17:73680400  | SYNGR2   | UTR3        |                                                                                      | + | TtoA | 0.1    | 0.1    | 2  | 2  | [10,10]  |
| chr5:150018957  | SYNPO    | UTR3        |                                                                                      | + | TtoC | 0.1    | 0.1818 | 3  | 3  | [10,12]  |
| chr7:105519476  | SYPL1    | UTR3        |                                                                                      | - | AtoG | 0.1    | 0.1176 | 4  | 2  | [10,17]  |
| chr1:154121060  | SYT11    | UTR3        |                                                                                      | + | TtoC | 0.1    | 0.1    | 3  | 2  | [10,10]  |
| chr1:27549519   | SYTL1    | coding_exon | ENST00000318074:VtoM;ENST00000485269:VtoM;                                           | + | GtoA | 0.1    | 0.1    | 2  | 2  | [10,20]  |
| chr8:38815167   | TACC1    | mixed       |                                                                                      | + | CtoA | 0.1111 | 0.125  | 2  | 2  | [16,18]  |
| chr8:38824796   | TACC1    | mixed       |                                                                                      | + | GtoA | 0.1333 | 0.1667 | 10 | 3  | [12,30]  |
| chr8:38826592   | TACC1    | mixed       |                                                                                      | + | TtoA | 0.1    | 0.1538 | 7  | 3  | [13,20]  |
| chr8:38829600   | TACC1    | UTR3        |                                                                                      | + | TtoC | 0.1    | 0.1818 | 6  | 2  | [10,11]  |
| chr4:1716608    | TACC3    | UTR3        |                                                                                      | + | AtoG | 0.1    | 0.1667 | 4  | 2  | [12,20]  |
| chr1:165098091  | TADA1L   | coding_exon |                                                                                      | - | TtoC | 0.1    | 0.1818 | 3  | 2  | [10,11]  |
| chr17:32911177  | TADA2L   | coding_exon | ENST00000225396:Eto*;ENST00000394395:Eto*;                                           | + | GtoT | 0.1    | 0.1    | 2  | 2  | [10,10]  |
| chr17:32911266  | TADA2L   | UTR3        |                                                                                      | + | TtoC | 0.1    | 0.1    | 6  | 2  | [10,10]  |
| chr3:9796668    | TADA3L   | UTR3        |                                                                                      | - | TtoG | 0.1    | 0.1111 | 4  | 2  | [10,10]  |
| chr3:9796669    | TADA3L   | UTR3        |                                                                                      | - | CtoA | 0.1    | 0.1    | 2  | 2  | [10,10]  |
| chr3:9796675    | TADA3L   | UTR3        |                                                                                      | - | TtoA | 0.1111 | 0.1667 | 5  | 2  | [12,18]  |
| chr11:6588677   | TAF10    | UTR3        |                                                                                      | - | TtoC | 0.1724 | 0.2222 | 4  | 2  | [10,32]  |
| chr16:82771451  | TAF1C    | coding_exon | ENST00000341690:FtoV;ENST00000378541:FtoV;                                           | - | TtoG | 0.1    | 0.2222 | 6  | 3  | [10,12]  |
| chr8:120864878  | TAF2     | coding_exon | ENST00000378164:LtoR;                                                                | - | TtoG | 0.1    | 0.1875 | 5  | 2  | [10,16]  |
| chr8:120864879  | TAF2     | coding_exon | ENST00000378164:Lto;                                                                 | - | CtoA | 0.1818 | 0.2    | 4  | 2  | [11,15]  |
| chr10:8046647   | TAF3     | coding_exon | ENST00000344293:StoA;                                                                | + | TtoG | 0.1    | 0.1    | 2  | 2  | [10,10]  |
| chr10:8047059   | TAF3     | coding_exon | ENST00000344293:KtoR;                                                                | + | AtoG | 0.1    | 0.1333 | 2  | 2  | [10,15]  |
| chr20:59984698  | TAF4     | coding_exon | ENST00000252996:LtoP;                                                                | - | TtoC | 0.1    | 0.1818 | 3  | 2  | [10,11]  |
| chr20:59984604  | TAF4     | UTR3        |                                                                                      | - | TtoC | 0.1    | 0.1    | 2  | 2  | [10,10]  |
| chr18:22223928  | TAF4B    | coding_exon | ENST00000269142:RtoQ;ENST00000418698:RtoQ;                                           | + | GtoA | 0.1    | 0.1818 | 2  | 2  | [10,11]  |
| chr10:105138803 | TAF5     | UTR3        |                                                                                      | + | AtoG | 0.102  | 0.1538 | 17 | 4  | [49,115] |
| chr1:227816747  | TAF5L    | coding_exon | ENST00000258281:StoP;ENST00000366674:StoP;ENST00000366675:StoP;ENST00000366676:StoP; | - | TtoC | 0.1667 | 0.9167 | 4  | 4  | [11,15]  |
| chr1:227816795  | TAF5L    | coding_exon | ENST00000258281:RtoW;ENST00000366674:RtoW;ENST00000366675:RtoW;ENST00000366676:RtoW; | - | CtoT | 0.12   | 0.1    | 10 | 9  | [17,41]  |
| chr1:227805007  | TAF5L    | coding_exon | ENST00000258281:RtoH;ENST00000366675:RtoH;ENST00000366676:RtoH;                      | - | GtoA | 0.1429 | 0.5    | 8  | 7  | [10,23]  |
| chr1:227805040  | TAF5L    | coding_exon | ENST00000258281:RtoH;ENST00000366675:RtoH;ENST00000366676:RtoH;                      | - | GtoA | 0.25   | 0.8235 | 9  | 6  | [16,24]  |
| chr1:227805277  | TAF5L    | coding_exon | ENST00000258281:QtoP;ENST00000366675:QtoP;ENST00000366676:QtoP;                      | - | AtoC | 0.1818 | 0.2308 | 4  | 3  | [10,13]  |
| chr1:227816831  | TAF5L    | coding_exon | ENST00000258281:QtoE;ENST00000366674:QtoE;ENST00000366675:QtoE;ENST00000366676:QtoE; | - | CtoG | 0.1    | 0.1333 | 7  | 2  | [10,15]  |
| chr1:227804989  | TAF5L    | coding_exon | ENST00000258281:NtoS;ENST00000366675:NtoS;ENST00000366676:NtoS;                      | - | AtoG | 0.1    | 0.3125 | 5  | 3  | [10,16]  |
| chr1:227805147  | TAF5L    | coding_exon | ENST00000258281:NtoK;ENST00000366675:NtoK;ENST00000366676:NtoK;                      | - | TtoA | 0.1    | 0.3077 | 6  | 5  | [10,20]  |
| chr1:227805051  | TAF5L    | coding_exon | ENST00000258281:KtoN;ENST00000366675:KtoN;ENST00000366676:KtoN;                      | - | GtoT | 0.1111 | 0.875  | 9  | 8  | [12,21]  |
| chr1:227805133  | TAF5L    | coding_exon | ENST00000258281:DtoG;ENST00000366675:DtoG;ENST00000366676:DtoG;                      | - | AtoG | 0.125  | 0.3636 | 5  | 3  | [11,16]  |
| chr1:227812541  | TAF5L    | coding_exon | ENST00000258281:Atov;ENST00000366675:Atov;ENST00000366676:Atov;                      | - | CtoT | 0.1111 | 0.3    | 8  | 5  | [11,23]  |
| chr1:227804649  | TAF5L    | coding_exon |                                                                                      | - | TtoC | 0.1    | 0.25   | 3  | 2  | [10,12]  |
| chr1:227804703  | TAF5L    | coding_exon |                                                                                      | - | CtoT | 0.25   | 0.8    | 8  | 6  | [10,12]  |
| chr1:227805132  | TAF5L    | coding_exon |                                                                                      | - | TtoC | 0.1    | 0.4615 | 4  | 3  | [10,17]  |
| chr1:227805249  | TAF5L    | coding_exon |                                                                                      | - | CtoT | 0.2    | 0.4545 | 7  | 4  | [10,14]  |
| chr1:227812477  | TAF5L    | coding_exon |                                                                                      | - | TtoC | 0.1667 | 0.4    | 5  | 2  | [10,12]  |
| chr1:227812525  | TAF5L    | coding_exon |                                                                                      | - | AtoG | 0.1364 | 0.95   | 13 | 9  | [10,25]  |
| chr1:227816775  | TAF5L    | coding_exon |                                                                                      | - | TtoC | 0.2    | 0.9667 | 12 | 12 | [10,30]  |
| chr1:227816826  | TAF5L    | coding_exon |                                                                                      | - | TtoC | 0.1    | 0.4    | 4  | 3  | [13,20]  |
| chr11:62302917  | TAF6L    | coding_exon | ENST00000294168:VtoG;                                                                | + | TtoG | 0.2    | 0.2    | 4  | 2  | [10,10]  |
| chr5:140678801  | TAF7     | mixed       |                                                                                      | - | AtoG | 0.1176 | 0.125  | 3  | 2  | [17,32]  |
| chr6:42144294   | TAF8     | coding_exon | ENST00000372977:TtoA;ENST00000372982:TtoA;ENST00000456846:TtoA;ENST00000456847:TtoA; | + | AtoG | 0.1    | 0.1    | 2  | 2  | [10,10]  |
| chr6:42154560   | TAF8     | mixed       |                                                                                      | + | AtoG | 0.2    | 0.2941 | 3  | 2  | [10,17]  |
| chr2:161769448  | TANK     | coding_exon | ENST00000259075:CtoW;ENST00000392749:CtoW;ENST00000402568:CtoW;ENST00000402569:CtoW; | + | TtoG | 0.1    | 0.1818 | 6  | 3  | [10,20]  |
| chr6:32904359   | TAP2     | mixed       |                                                                                      | - | AtoG | 0.1429 | 0.2222 | 4  | 2  | [10,14]  |
| chr6:32904464   | TAP2     | mixed       |                                                                                      | - | TtoC | 0.1364 | 0.2    | 4  | 3  | [10,22]  |
| chr6:33375451   | TAPBP    | UTR3        |                                                                                      | - | AtoG | 0.1176 | 0.3529 | 3  | 3  | [10,18]  |
| chr6:33375454   | TAPBP    | UTR3        |                                                                                      | - | TtoC | 0.1429 | 0.2    | 5  | 2  | [15,22]  |
| chr6:33375456   | TAPBP    | UTR3        |                                                                                      | - | CtoA | 0.1111 | 0.1429 | 5  | 3  | [14,32]  |
| chr6:33375458   | TAPBP    | UTR3        |                                                                                      | - | TtoA | 0.1    | 0.2222 | 6  | 6  | [12,31]  |
| chr6:33377372   | TAPBP    | UTR3        |                                                                                      | - | CtoT | 0.1053 | 0.2    | 6  | 3  | [10,19]  |
| chr12:6438360   | TAPBPL   | coding_exon | ENST00000266556:QtoR;                                                                | + | AtoG | 0.1111 | 0.1667 | 2  | 2  | [10,12]  |
| chr12:6440363   | TAPBPL   | coding_exon | ENST00000266556:QtoP;                                                                | + | AtoC | 0.1034 | 0.2308 | 8  | 6  | [13,31]  |
| chr1:232635855  | TARBP1   | coding_exon | ENST0000040877:GtoD;                                                                 | - | GtoA | 0.1    | 0.1    | 3  | 2  | [10,10]  |
| chr1:232609044  | TARBP1   | coding_exon |                                                                                      | - | AtoG | 0.1765 | 0.2    | 2  | 2  | [10,17]  |
| chr1:232652888  | TARBP1   | coding_exon |                                                                                      | - | TtoG | 0.1    | 0.1    | 4  | 2  | [10,10]  |
| chr12:52186392  | TARBP2   | UTR3        |                                                                                      | + | TtoC | 0.1    | 0.2667 | 6  | 3  | [10,19]  |
| chr5:33490881   | TARS     | coding_exon |                                                                                      | + | TtoC | 0.1026 | 0.1111 | 2  | 2  | [18,40]  |
| chr5:33503844   | TARS     | UTR3        |                                                                                      | + | TtoC | 0.1017 | 0.1154 | 11 | 3  | [26,118] |
| chr8:125570061  | TATDN1   | coding_exon | ENST00000276692:NtoK;                                                                | - | TtoA | 0.1    | 0.1111 | 3  | 2  | [10,27]  |
| chr3:10295145   | TATDN2   | coding_exon | ENST00000287652:QtoR;ENST00000448281:QtoR;                                           | + | AtoG | 0.1176 | 0.1818 | 2  | 2  | [11,17]  |
| chr3:10297280   | TATDN2   | UTR3        |                                                                                      | + | GtoA | 0.1    | 0.1    | 2  | 2  | [10,10]  |
| chr3:10297809   | TATDN2   | UTR3        |                                                                                      | + | TtoA | 0.1053 | 0.1429 | 7  | 2  | [19,21]  |
| chr1:211055212  | TATDN3   | UTR3        |                                                                                      | + | AtoG | 0.1    | 0.1    | 2  | 2  | [10,10]  |
| chr7:27834942   | TAX1BP1  | coding_exon | ENST00000265393:HtoR;ENST00000396319:HtoR;ENST00000409980:HtoR;ENST00000409981:HtoR; | + | AtoG | 0.1    | 0.2632 | 15 | 10 | [17,31]  |
| chr4:37699642   | TBC1D1   | coding_exon | ENST00000261439:VtoG;                                                                | + | TtoG | 0.1    | 0.1    | 2  | 2  | [10,10]  |
| chr4:37696428   | TBC1D1   | coding_exon | ENST00000261439:KtoR;                                                                | + | AtoG | 0.1053 | 0.1875 | 2  | 2  | [16,19]  |
| chr19:55082637  | TBC1D17  | coding_exon | ENST00000221543:WtoG;                                                                | + | TtoG | 0.125  | 0.1538 | 4  | 2  | [13,16]  |
| chr19:55073638  | TBC1D17  | coding_exon | ENST00000221543:KtoN;                                                                | + | GtoT | 0.1    | 0.1333 | 5  | 2  | [10,15]  |
| chr19:55077221  | TBC1D17  | coding_exon |                                                                                      | + | AtoG | 0.1176 | 0.1786 | 4  | 2  | [17,28]  |
| chr20:365065    | TBC1D20  | UTR3        |                                                                                      | - | TtoC | 0.1    | 0.125  | 3  | 2  | [10,16]  |
| chr22:45949498  | TBC1D22A | UTR3        |                                                                                      | + | CtoA | 0.1    | 0.1    | 2  | 2  | [10,10]  |
| chr22:45949579  | TBC1D22A | UTR3        |                                                                                      | + | TtoC | 0.1    | 0.1    | 2  | 2  | [10,10]  |
| chr3:17391143   | TBC1D5   | coding_exon | ENST00000253692:YtoS;ENST00000429383:YtoS;ENST00000429924:YtoS;ENST00000429925:YtoS; | - | AtoC | 0.1    | 0.1    | 3  | 2  | [10,10]  |
| chr3:17373779   | TBC1D5   | UTR3        |                                                                                      | - | TtoA | 0.1111 | 0.1765 | 15 | 2  | [18,37]  |
| chr3:17174068   | TBC1D5   | UTR3        |                                                                                      | - | GtoC | 0.1    | 0.1481 | 4  | 3  | [20,27]  |
| chr3:17174552   | TBC1D5   | UTR3        |                                                                                      | - | AtoC | 0.1333 | 0.15   | 3  | 2  | [15,20]  |
| chr3:17176481   | TBC1D5   | UTR3        |                                                                                      | - | AtoG | 0.1    | 0.1    | 3  | 2  | [10,10]  |
| chr2:101001892  | TBC1D8   | coding_exon |                                                                                      | - | AtoC | 0.1538 | 0.1818 | 3  | 2  | [11,13]  |
| chr2:100989214  | TBC1D8   | mixed       |                                                                                      | - | AtoT | 0.1    | 0.2308 | 3  | 2  | [10,14]  |
| chr2:100989313  | TBC1D8   | mixed       |                                                                                      | - | GtoT | 0.1118 | 0.5185 | 15 | 15 | [27,471] |
| chr2:100989314  | TBC1D8   | mixed       |                                                                                      | - | AtoT | 0.3671 | 0.8333 | 10 | 10 | [13,170] |

|                 |          |             |                                                                                                                                                                                                                                                                                                                             |   |      |        |        |    |    |          |
|-----------------|----------|-------------|-----------------------------------------------------------------------------------------------------------------------------------------------------------------------------------------------------------------------------------------------------------------------------------------------------------------------------|---|------|--------|--------|----|----|----------|
| chr2:100989315  | TBC1D8   | mixed       |                                                                                                                                                                                                                                                                                                                             | - | AtoT | 0.1304 | 0.5882 | 11 | 11 | [13,64]  |
| chr2:100989317  | TBC1D8   | mixed       |                                                                                                                                                                                                                                                                                                                             | - | TtoC | 0.2105 | 0.25   | 6  | 3  | [10,21]  |
| chr5:179222356  | TBC1D9B  | UTR3        |                                                                                                                                                                                                                                                                                                                             | - | AtoG | 0.1    | 0.1176 | 2  | 2  | [10,18]  |
| chr5:179222881  | TBCA     | UTR3        |                                                                                                                                                                                                                                                                                                                             | - | TtoC | 0.1    | 0.1538 | 5  | 2  | [10,13]  |
| chr1:233644522  | TBCE     | coding_exon | ENST00000366601:TtoP;ENST00000406207:TtoP;                                                                                                                                                                                                                                                                                  | + | AtoC | 0.1    | 0.1    | 2  | 2  | [10,10]  |
| chr12:63177068  | TBK1     | coding_exon |                                                                                                                                                                                                                                                                                                                             | + | AtoG | 0.1    | 0.1    | 4  | 2  | [10,10]  |
| chr7:72626777   | TBL2     | coding_exon | ENST00000305632:QtoK;ENST00000432538:QtoK;ENST00000452475:QtoK;                                                                                                                                                                                                                                                             | - | CtoA | 0.1    | 0.1    | 3  | 2  | [10,10]  |
| chr7:72622801   | TBL2     | coding_exon | ENST00000305632:LtoR;ENST00000432538:LtoR;                                                                                                                                                                                                                                                                                  | - | TtoG | 0.1    | 0.125  | 4  | 2  | [10,16]  |
| chr6:134350162  | TBPL1    | UTR3        |                                                                                                                                                                                                                                                                                                                             | + | AtoG | 0.1111 | 0.1667 | 3  | 2  | [13,18]  |
| chr8:55054254   | TCEA1P2  | coding_exon | ENST00000396401:RtoW;ENST00000399633:RtoW;                                                                                                                                                                                                                                                                                  | - | CtoT | 0.129  | 0.2097 | 5  | 3  | [31,83]  |
| chr8:55063271   | TCEA1P2  | coding_exon | ENST00000396401:RtoQ;ENST00000399633:RtoQ;                                                                                                                                                                                                                                                                                  | - | GtoA | 0.1176 | 0.2407 | 4  | 4  | [57,108] |
| chr20:62168771  | TCEA2    | coding_exon |                                                                                                                                                                                                                                                                                                                             | + | CtoA | 0.1    | 0.1    | 2  | 2  | [10,10]  |
| chr20:62165690  | TCEA2    | mixed       |                                                                                                                                                                                                                                                                                                                             | + | GtoA | 0.125  | 0.25   | 3  | 2  | [12,16]  |
| chr20:62168274  | TCEA2    | mixed       |                                                                                                                                                                                                                                                                                                                             | + | AtoT | 0.1176 | 0.3333 | 8  | 6  | [12,22]  |
| chr20:62168276  | TCEA2    | mixed       |                                                                                                                                                                                                                                                                                                                             | + | GtoA | 0.1    | 0.2    | 7  | 4  | [10,20]  |
| chr8:75021435   | TCEB1    | coding_exon | ENST00000284811:NtoS;                                                                                                                                                                                                                                                                                                       | - | AtoG | 0.1    | 0.1667 | 7  | 2  | [10,12]  |
| chr8:75021440   | TCEB1    | coding_exon |                                                                                                                                                                                                                                                                                                                             | - | TtoC | 0.1143 | 0.1778 | 12 | 4  | [35,54]  |
| chr16:2761989   | TCEB2    | mixed       |                                                                                                                                                                                                                                                                                                                             | - | AtoC | 0.1    | 0.925  | 9  | 5  | [23,161] |
| chr1:23950016   | TCEB3    | coding_exon | ENST00000374536:YtoN;ENST00000418390:YtoN;                                                                                                                                                                                                                                                                                  | + | TtoA | 0.1    | 0.1176 | 2  | 2  | [10,17]  |
| chr1:23958813   | TCEB3    | UTR3        |                                                                                                                                                                                                                                                                                                                             | + | AtoC | 0.1176 | 0.1429 | 4  | 2  | [15,17]  |
| chr5:145863275  | TCERG1   | coding_exon | ENST00000296702:YtoH;ENST00000394421:YtoH;                                                                                                                                                                                                                                                                                  | + | TtoC | 0.1    | 0.1111 | 4  | 2  | [10,20]  |
| chr5:145839650  | TCERG1   | coding_exon | ENST00000296702:QtoR;ENST00000394421:QtoR;                                                                                                                                                                                                                                                                                  | + | AtoG | 0.1111 | 0.2    | 5  | 3  | [10,26]  |
| chr15:55367486  | TCF12    | UTR3        |                                                                                                                                                                                                                                                                                                                             | + | AtoG | 0.1    | 0.1818 | 3  | 2  | [10,11]  |
| chr22:40940121  | TCF20    | mixed       |                                                                                                                                                                                                                                                                                                                             | - | TtoC | 0.1    | 0.1    | 2  | 2  | [10,10]  |
| chr22:40940737  | TCF20    | mixed       |                                                                                                                                                                                                                                                                                                                             | - | CtoT | 0.1    | 0.4286 | 3  | 2  | [10,21]  |
| chr18:51045271  | TCF4     | UTR3        |                                                                                                                                                                                                                                                                                                                             | - | TtoC | 0.1667 | 0.1818 | 3  | 2  | [11,19]  |
| chr18:51045932  | TCF4     | UTR3        |                                                                                                                                                                                                                                                                                                                             | - | CtoG | 0.1    | 0.1667 | 3  | 3  | [10,15]  |
| chr18:51045966  | TCF4     | UTR3        |                                                                                                                                                                                                                                                                                                                             | - | AtoG | 0.1071 | 0.1111 | 4  | 2  | [18,29]  |
| chr5:133502627  | TCF7     | coding_exon | ENST00000321584:WtoR;ENST00000321603:WtoR;ENST00000340914:WtoR;ENST00000321584:StoT;ENST00000321603:StoT;ENST00000340914:StoT;ENST00000321584:FtoS;ENST00000321603:FtoS;ENST00000340914:FtoS;ENST00000321584:FtoL;ENST00000321603:FtoL;ENST00000340914:FtoL;ENST00000321584:YtoN;ENST00000321603:YtoN;ENST00000340914:YtoN; | + | TtoA | 0.1    | 0.2059 | 9  | 6  | [29,110] |
| chr5:133502625  | TCF7     | coding_exon | ENST00000321584:StoT;ENST00000321603:StoT;ENST00000340914:StoT;ENST00000321584:FtoS;ENST00000321603:FtoS;ENST00000340914:FtoS;ENST00000321584:FtoL;ENST00000321603:FtoL;ENST00000340914:FtoL;ENST00000321584:YtoN;ENST00000321603:YtoN;ENST00000340914:YtoN;                                                                | + | GtoC | 0.1111 | 0.1667 | 8  | 2  | [12,54]  |
| chr5:133505777  | TCF7     | coding_exon | ENST00000321584:FtoS;ENST00000321603:FtoS;ENST00000340914:FtoS;ENST00000321584:FtoL;ENST00000321603:FtoL;ENST00000340914:FtoL;ENST00000321584:YtoN;ENST00000321603:YtoN;ENST00000340914:YtoN;                                                                                                                               | + | TtoC | 0.1053 | 0.119  | 8  | 2  | [42,135] |
| chr5:133505776  | TCF7     | coding_exon | ENST00000321584:FtoL;ENST00000321603:FtoL;ENST00000340914:FtoL;ENST00000321584:YtoN;ENST00000321603:YtoN;ENST00000340914:YtoN;                                                                                                                                                                                              | + | TtoC | 0.1    | 0.2121 | 12 | 9  | [13,116] |
| chr5:133511214  | TCF7     | UTR3        |                                                                                                                                                                                                                                                                                                                             | + | TtoC | 0.125  | 0.1429 | 5  | 2  | [16,29]  |
| chr12:108830883 | TCHP     | coding_exon | ENST00000312777:LtoP;ENST00000405876:LtoP;                                                                                                                                                                                                                                                                                  | + | TtoC | 0.1    | 0.1429 | 8  | 2  | [10,14]  |
| chr12:108826930 | TCHP     | coding_exon |                                                                                                                                                                                                                                                                                                                             | + | TtoC | 0.1    | 0.1    | 2  | 2  | [10,10]  |
| chr11:67567074  | TCIRG1   | coding_exon | ENST00000265686:NtoS;                                                                                                                                                                                                                                                                                                       | + | AtoG | 0.1765 | 0.3636 | 6  | 4  | [11,34]  |
| chr11:67574934  | TCIRG1   | UTR3        |                                                                                                                                                                                                                                                                                                                             | + | TtoC | 0.1111 | 0.3333 | 7  | 5  | [10,36]  |
| chr11:33063141  | TCP11L1  | coding_exon | ENST00000324357:LtoF;                                                                                                                                                                                                                                                                                                       | + | CtoT | 0.1    | 0.1667 | 2  | 2  | [10,12]  |
| chr11:33062920  | TCP11L1  | coding_exon |                                                                                                                                                                                                                                                                                                                             | + | AtoC | 0.1    | 0.1    | 2  | 2  | [10,10]  |
| chr11:33063140  | TCP11L1  | coding_exon |                                                                                                                                                                                                                                                                                                                             | + | TtoC | 0.1    | 0.1818 | 2  | 2  | [10,11]  |
| chr14:89503492  | TDP1     | mixed       |                                                                                                                                                                                                                                                                                                                             | + | TtoC | 0.1    | 0.1    | 3  | 2  | [10,10]  |
| chr9:99233120   | TDRD7    | mixed       |                                                                                                                                                                                                                                                                                                                             | + | GtoC | 0.1    | 0.1    | 2  | 2  | [10,10]  |
| chr9:99262707   | TDRD7    | mixed       |                                                                                                                                                                                                                                                                                                                             | + | GtoA | 0.1    | 0.1429 | 2  | 2  | [10,14]  |
| chr4:47835790   | TEC      | coding_exon |                                                                                                                                                                                                                                                                                                                             | - | TtoC | 0.1515 | 0.2    | 3  | 3  | [15,33]  |
| chr7:97683578   | TECPR1   | UTR3        |                                                                                                                                                                                                                                                                                                                             | - | TtoG | 0.1    | 0.1765 | 2  | 2  | [10,17]  |
| chr16:1485608   | TELO2    | mixed       |                                                                                                                                                                                                                                                                                                                             | + | TtoG | 0.1176 | 0.1538 | 3  | 2  | [13,17]  |
| chr14:19904217  | TEP1     | UTR3        |                                                                                                                                                                                                                                                                                                                             | - | AtoG | 0.1    | 0.1429 | 3  | 2  | [10,14]  |
| chr14:19904223  | TEP1     | UTR3        |                                                                                                                                                                                                                                                                                                                             | - | AtoG | 0.1304 | 0.2    | 2  | 2  | [20,23]  |
| chr14:19904333  | TEP1     | UTR3        |                                                                                                                                                                                                                                                                                                                             | - | AtoG | 0.1333 | 0.2727 | 2  | 2  | [12,15]  |
| chr14:19904355  | TEP1     | UTR3        |                                                                                                                                                                                                                                                                                                                             | - | AtoG | 0.1818 | 0.3    | 5  | 3  | [10,11]  |
| chr14:19904356  | TEP1     | UTR3        |                                                                                                                                                                                                                                                                                                                             | - | AtoG | 0.1    | 0.25   | 7  | 5  | [10,14]  |
| chr14:19904361  | TEP1     | UTR3        |                                                                                                                                                                                                                                                                                                                             | - | AtoG | 0.1    | 0.1538 | 3  | 2  | [10,13]  |
| chr14:19904897  | TEP1     | UTR3        |                                                                                                                                                                                                                                                                                                                             | - | AtoG | 0.1667 | 0.1538 | 2  | 2  | [10,12]  |
| chr14:19904900  | TEP1     | UTR3        |                                                                                                                                                                                                                                                                                                                             | - | AtoG | 0.4615 | 0.6154 | 2  | 2  | [13,13]  |
| chr14:19904936  | TEP1     | UTR3        |                                                                                                                                                                                                                                                                                                                             | - | AtoG | 0.1    | 0.2    | 2  | 2  | [10,10]  |
| chr14:19904940  | TEP1     | UTR3        |                                                                                                                                                                                                                                                                                                                             | - | AtoG | 0.1    | 0.1818 | 2  | 2  | [10,11]  |
| chr14:19904954  | TEP1     | UTR3        |                                                                                                                                                                                                                                                                                                                             | - | AtoG | 0.1    | 0.1    | 2  | 2  | [10,10]  |
| chr14:19904979  | TEP1     | UTR3        |                                                                                                                                                                                                                                                                                                                             | - | AtoG | 0.1667 | 0.3846 | 4  | 4  | [10,13]  |
| chr14:19906382  | TEP1     | UTR3        |                                                                                                                                                                                                                                                                                                                             | - | AtoG | 0.1    | 0.3    | 2  | 2  | [10,10]  |
| chr16:67958431  | TERF2    | coding_exon | ENST00000254942:RtoG;                                                                                                                                                                                                                                                                                                       | - | AtoG | 0.1    | 0.1    | 2  | 2  | [10,10]  |
| chr16:67976039  | TERF2    | coding_exon | ENST00000254942:EtoA;                                                                                                                                                                                                                                                                                                       | - | AtoC | 0.1    | 0.12   | 3  | 2  | [20,25]  |
| chr16:67952893  | TERF2    | coding_exon |                                                                                                                                                                                                                                                                                                                             | - | AtoG | 0.1    | 0.1333 | 3  | 2  | [15,20]  |
| chr1:45582824   | TESK2    | UTR3        |                                                                                                                                                                                                                                                                                                                             | - | AtoG | 0.1    | 0.1    | 2  | 2  | [10,10]  |
| chr4:106416808  | TET2     | mixed       |                                                                                                                                                                                                                                                                                                                             | + | TtoC | 0.1    | 0.12   | 2  | 2  | [10,25]  |
| chr4:106419942  | TET2     | UTR3        |                                                                                                                                                                                                                                                                                                                             | + | AtoG | 0.1    | 0.1818 | 9  | 2  | [11,11]  |
| chr2:74186008   | TET3     | UTR3        |                                                                                                                                                                                                                                                                                                                             | + | TtoC | 0.1    | 0.1    | 2  | 2  | [10,10]  |
| chr2:74186728   | TET3     | UTR3        |                                                                                                                                                                                                                                                                                                                             | + | CtoT | 0.1    | 0.1818 | 2  | 2  | [10,11]  |
| chr2:74187616   | TET3     | UTR3        |                                                                                                                                                                                                                                                                                                                             | + | AtoG | 0.1    | 0.1818 | 4  | 3  | [10,19]  |
| chr2:74187761   | TET3     | UTR3        |                                                                                                                                                                                                                                                                                                                             | + | AtoG | 0.1    | 0.1333 | 2  | 2  | [15,20]  |
| chr2:74188482   | TET3     | UTR3        |                                                                                                                                                                                                                                                                                                                             | + | AtoG | 0.1    | 0.1429 | 3  | 2  | [10,14]  |
| chr2:74188494   | TET3     | UTR3        |                                                                                                                                                                                                                                                                                                                             | + | AtoG | 0.1    | 0.1    | 2  | 2  | [10,10]  |
| chr9:102151371  | TEX10    | coding_exon |                                                                                                                                                                                                                                                                                                                             | - | CtoT | 0.1    | 0.1    | 3  | 2  | [10,10]  |
| chr9:102104278  | TEX10    | UTR3        |                                                                                                                                                                                                                                                                                                                             | - | TtoC | 0.1    | 0.1111 | 3  | 3  | [10,18]  |
| chr17:59579446  | TEX2     | UTR3        |                                                                                                                                                                                                                                                                                                                             | - | GtoA | 0.1    | 0.2    | 3  | 2  | [10,10]  |
| chr15:54508385  | TEX9     | UTR3        |                                                                                                                                                                                                                                                                                                                             | + | AtoG | 0.1818 | 0.3    | 2  | 2  | [10,11]  |
| chr10:59815388  | TFAM     | coding_exon | ENST00000373895:CtoW;ENST00000487519:CtoW;                                                                                                                                                                                                                                                                                  | + | TtoG | 0.1    | 0.1304 | 3  | 2  | [23,40]  |
| chr12:49775054  | TFCP2    | UTR3        |                                                                                                                                                                                                                                                                                                                             | - | TtoC | 0.1    | 0.1538 | 11 | 4  | [10,27]  |
| chr3:143153121  | TFDP2    | UTR3        |                                                                                                                                                                                                                                                                                                                             | - | TtoC | 0.1    | 0.1111 | 2  | 2  | [10,18]  |
| chr6:41759705   | TFEB     | UTR3        |                                                                                                                                                                                                                                                                                                                             | - | CtoG | 0.2    | 0.2174 | 2  | 2  | [10,24]  |
| chr3:101950110  | TFG      | UTR3        |                                                                                                                                                                                                                                                                                                                             | + | TtoC | 0.1273 | 0.2222 | 4  | 2  | [18,55]  |
| chr19:46528658  | TGFBI    | UTR3        |                                                                                                                                                                                                                                                                                                                             | - | CtoA | 0.4    | 0.5714 | 3  | 3  | [10,17]  |
| chr1:91921247   | TGFBR3   | UTR3        |                                                                                                                                                                                                                                                                                                                             | - | TtoC | 0.1538 | 0.1538 | 3  | 2  | [13,13]  |
| chr2:105263286  | TGFBRAP1 | coding_exon | ENST00000258449:LtoQ;ENST00000393359:LtoQ;                                                                                                                                                                                                                                                                                  | - | AtoA | 0.1429 | 0.1538 | 3  | 2  | [13,14]  |
| chr2:105248849  | TGFBRAP1 | UTR3        |                                                                                                                                                                                                                                                                                                                             | - | AtoC | 0.1    | 0.1    | 2  | 2  | [10,10]  |
| chr2:105250011  | TGFBRAP1 | UTR3        |                                                                                                                                                                                                                                                                                                                             | - | TtoC | 0.1    | 0.1429 | 2  | 2  | [10,14]  |
| chr20:34652727  | TGIF2    | coding_exon | ENST00000373872:IttoV;ENST00000373874:IttoV;                                                                                                                                                                                                                                                                                | + | AtoG | 0.1111 | 0.1875 | 3  | 2  | [16,27]  |
| chr20:34652798  | TGIF2    | coding_exon |                                                                                                                                                                                                                                                                                                                             | + | TtoA | 0.1538 | 0.2143 | 7  | 2  | [13,14]  |
| chr20:34654000  | TGIF2    | UTR3        |                                                                                                                                                                                                                                                                                                                             | + | CtoA | 0.1667 | 0.1667 | 5  | 2  | [12,12]  |
| chr20:34655683  | TGIF2    | UTR3        |                                                                                                                                                                                                                                                                                                                             | + | AtoG | 0.1053 | 0.1053 | 9  | 2  | [19,19]  |
| chr2:85400243   | TGOLN2   | UTR3        |                                                                                                                                                                                                                                                                                                                             | - | TtoC | 0.1111 | 0.1176 | 7  | 2  | [17,28]  |
| chr2:85401235   | TGOLN2   | UTR3        |                                                                                                                                                                                                                                                                                                                             | - | AtoT | 0.1    | 0.1    | 2  | 2  | [10,20]  |
| chr2:85401584   | TGOLN2   | UTR3        |                                                                                                                                                                                                                                                                                                                             | - | CtoA | 0.1667 | 0.2727 | 3  | 2  | [11,12]  |
| chr2:85403272   | TGOLN2   | UTR3        |                                                                                                                                                                                                                                                                                                                             | - | TtoC | 0.1667 | 0.1875 | 5  | 2  | [16,19]  |
| chr2:85403333   | TGOLN2   | UTR3        |                                                                                                                                                                                                                                                                                                                             | - | AtoG | 0.1    | 0.1111 | 4  | 2  | [10,18]  |
| chr8:56900347   | TGS1     | UTR3        |                                                                                                                                                                                                                                                                                                                             | + | TtoG | 0.1    | 0.2    | 2  | 2  | [10,10]  |
| chr20:57002211  | TH1L     | coding_exon |                                                                                                                                                                                                                                                                                                                             | + | TtoG | 0.1154 | 0.1579 | 2  | 2  | [19,26]  |

|                 |          |             |                                                                                      |   |      |        |        |    |   |         |
|-----------------|----------|-------------|--------------------------------------------------------------------------------------|---|------|--------|--------|----|---|---------|
| chr20:57003340  | TH1L     | UTR3        |                                                                                      | + | TtoC | 0.1207 | 0.125  | 2  | 2 | [16,58] |
| chr2:43565935   | THADA    | mixed       |                                                                                      | - | TtoG | 0.1    | 0.1    | 3  | 2 | [10,10] |
| chr2:43657845   | THADA    | mixed       |                                                                                      | - | TtoC | 0.1    | 0.125  | 2  | 2 | [10,16] |
| chr8:42812440   | THAP1    | mixed       |                                                                                      | - | AtoG | 0.1    | 0.1429 | 2  | 2 | [10,14] |
| chr5:157100121  | THG1L    | UTR3        |                                                                                      | + | GtoT | 0.1    | 0.1    | 2  | 2 | [10,10] |
| chr18:205461    | THOC1    | coding_exon | ENST00000261600:EtoG;                                                                | - | AtoG | 0.1    | 0.1053 | 3  | 2 | [10,19] |
| chr18:214941    | THOC1    | coding_exon |                                                                                      | - | AtoG | 0.1176 | 0.2    | 4  | 3 | [10,17] |
| chr17:77439215  | THOC4    | UTR3        |                                                                                      | - | AtoG | 0.1538 | 0.2727 | 5  | 4 | [11,29] |
| chr22:28280818  | THOC5    | mixed       |                                                                                      | - | AtoG | 0.1905 | 0.2    | 4  | 2 | [10,23] |
| chr22:28276747  | THOC5    | UTR5        |                                                                                      | - | TtoC | 0.1    | 0.1176 | 2  | 2 | [10,17] |
| chr3:63794745   | THOC7    | UTR3        |                                                                                      | - | AtoG | 0.1429 | 0.3077 | 3  | 2 | [14,21] |
| chr3:63794746   | THOC7    | UTR3        |                                                                                      | - | TtoA | 0.1    | 0.3333 | 7  | 6 | [10,25] |
| chr14:23095991  | THTPA    | coding_exon | ENST00000288014:Wto*;ENST00000404535:Wto*;                                           | + | GtoA | 0.1    | 0.1111 | 3  | 2 | [10,18] |
| chr11:133623444 | THYN1    | UTR3        |                                                                                      | - | TtoC | 0.1053 | 0.125  | 3  | 2 | [19,24] |
| chr2:70296010   | TIA1     | coding_exon |                                                                                      | - | AtoG | 0.1852 | 0.2727 | 7  | 5 | [11,27] |
| chr10:121324599 | TIAL1    | UTR3        |                                                                                      | - | AtoG | 0.1    | 0.1875 | 5  | 2 | [16,20] |
| chr10:121325088 | TIAL1    | UTR3        |                                                                                      | - | TtoC | 0.12   | 0.16   | 8  | 2 | [25,25] |
| chr10:121346278 | TIAL1    | UTR5        |                                                                                      | - | TtoC | 0.1    | 0.1333 | 2  | 2 | [10,15] |
| chr10:121346302 | TIAL1    | UTR5        |                                                                                      | - | TtoC | 0.125  | 0.1429 | 2  | 2 | [14,16] |
| chr19:4768255   | TICAM1   | mixed       |                                                                                      | - | TtoG | 0.1    | 0.1176 | 3  | 2 | [10,17] |
| chr4:113417379  | TIFA     | UTR3        |                                                                                      | - | TtoC | 0.1    | 0.1538 | 2  | 2 | [10,13] |
| chr16:3281438   | TIGD7    | coding_exon |                                                                                      | - | TtoC | 0.1    | 0.1    | 4  | 2 | [10,10] |
| chr12:55113684  | TIMELESS | coding_exon | ENST00000229201:QtoE;ENST00000447258:QtoE;ENST00000452204:QtoE;                      | - | CtoG | 0.1    | 0.1538 | 4  | 3 | [10,19] |
| chr12:55110172  | TIMELESS | coding_exon | ENST00000229201:LtoR;ENST00000452204:LtoR;                                           | - | TtoG | 0.1    | 0.1    | 6  | 2 | [10,20] |
| chr1:200205474  | TIMM17A  | UTR3        |                                                                                      | + | TtoC | 0.1    | 0.1053 | 9  | 2 | [20,20] |
| chr1:200205848  | TIMM17A  | UTR3        |                                                                                      | + | GtoA | 0.1333 | 0.2727 | 6  | 3 | [11,15] |
| chr19:7912052   | TIMM44   | coding_exon | ENST00000270538:StoP;                                                                | - | TtoC | 0.1    | 0.1    | 2  | 2 | [10,10] |
| chr19:44672403  | TIMM50   | UTR3        |                                                                                      | + | CtoA | 0.1053 | 0.1111 | 11 | 2 | [20,27] |
| chr11:111461089 | TIMM8B   | UTR3        |                                                                                      | - | AtoG | 0.1111 | 0.1333 | 3  | 2 | [10,15] |
| chr14:57945251  | TIMM9    | UTR3        |                                                                                      | - | TtoC | 0.1304 | 0.2727 | 4  | 3 | [11,23] |
| chr5:74108390   | TINP1    | UTR3        |                                                                                      | + | TtoA | 0.1538 | 0.1538 | 2  | 2 | [14,14] |
| chr3:157906651  | TIPARP   | UTR3        |                                                                                      | + | TtoA | 0.1    | 0.1667 | 3  | 2 | [10,24] |
| chr3:157906784  | TIPARP   | UTR3        |                                                                                      | + | TtoC | 0.1    | 0.1    | 5  | 2 | [10,20] |
| chr3:157907057  | TIPARP   | UTR3        |                                                                                      | + | TtoG | 0.1667 | 0.25   | 2  | 2 | [12,12] |
| chr1:166437840  | TIPRL    | UTR3        |                                                                                      | + | TtoC | 0.1    | 0.1    | 2  | 2 | [10,10] |
| chr9:71059014   | TJP2     | coding_exon | ENST00000348208:StoR;ENST00000377245:StoR;                                           | + | TtoG | 0.125  | 0.1923 | 7  | 2 | [26,32] |
| chr9:71021127   | TJP2     | coding_exon | ENST00000265384:HtoR;ENST00000348208:HtoR;ENST00000377245:HtoR;ENST00000377245:HtoR; | + | AtoG | 0.1    | 0.1176 | 4  | 2 | [17,20] |
| chr9:71059585   | TJP2     | UTR3        |                                                                                      | + | TtoG | 0.1    | 0.1    | 4  | 2 | [10,10] |
| chr9:71059704   | TJP2     | UTR3        |                                                                                      | + | AtoG | 0.1    | 0.1    | 3  | 2 | [10,10] |
| chr15:68140022  | TLE3     | coding_exon |                                                                                      | - | GtoC | 0.5    | 0.6818 | 2  | 2 | [20,22] |
| chr15:68128220  | TLE3     | UTR3        |                                                                                      | - | GtoC | 0.6087 | 1      | 2  | 2 | [18,23] |
| chr15:68128959  | TLE3     | UTR3        |                                                                                      | - | TtoA | 0.1538 | 0.1667 | 2  | 2 | [12,13] |
| chr9:81526478   | TLE4     | coding_exon | ENST00000265284:QtoR;ENST00000376534:QtoR;ENST00000376537:QtoR;ENST00000376538:QtoR; | + | AtoG | 0.1    | 0.1    | 2  | 2 | [10,10] |
| chr2:171625911  | TLK1     | coding_exon | ENST00000360843:TtoK;ENST00000431350:TtoK;ENST00000434911:TtoK;ENST00000434911:TtoK; | - | CtoA | 0.1    | 0.1053 | 3  | 2 | [10,19] |
| chr2:171566881  | TLK1     | UTR3        |                                                                                      | - | TtoC | 0.1    | 0.1    | 4  | 2 | [10,30] |
| chr4:38451585   | TLR10    | mixed       |                                                                                      | - | TtoC | 0.1    | 0.1    | 8  | 2 | [10,11] |
| chr4:38451644   | TLR10    | mixed       |                                                                                      | - | AtoG | 0.1    | 0.1053 | 5  | 2 | [19,42] |
| chr4:38452205   | TLR10    | mixed       |                                                                                      | - | TtoA | 0.1    | 0.1    | 5  | 2 | [10,10] |
| chr8:38967612   | TM2D2    | UTR3        |                                                                                      | - | AtoG | 0.1    | 0.1176 | 3  | 2 | [10,17] |
| chr15:100000036 | TM2D3    | mixed       |                                                                                      | - | AtoG | 0.1818 | 0.2    | 2  | 2 | [11,11] |
| chr15:100000134 | TM2D3    | mixed       |                                                                                      | - | TtoG | 0.1    | 0.1    | 6  | 2 | [10,11] |
| chr15:99999696  | TM2D3    | mixed       |                                                                                      | - | TtoC | 0.1    | 0.1875 | 7  | 2 | [11,34] |
| chr14:23728490  | TM9SF1   | coding_exon | ENST00000261789:YtoH;                                                                | - | TtoC | 0.1    | 0.1111 | 3  | 2 | [10,18] |
| chr14:23728668  | TM9SF1   | coding_exon |                                                                                      | - | TtoC | 0.1    | 0.1429 | 2  | 2 | [10,14] |
| chr13:98986947  | TM9SF2   | coding_exon | ENST00000376387:CtoW;ENST00000419976:CtoW;                                           | + | TtoG | 0.1111 | 0.1429 | 4  | 2 | [21,27] |
| chr10:98277818  | TM9SF3   | coding_exon | ENST00000371142:VtoL;                                                                | - | GtoT | 0.1    | 0.1538 | 3  | 2 | [10,13] |
| chr10:98326517  | TM9SF3   | coding_exon |                                                                                      | - | TtoC | 0.1    | 0.1333 | 3  | 2 | [10,16] |
| chr10:98271524  | TM9SF3   | UTR3        |                                                                                      | - | TtoC | 0.1    | 0.1    | 2  | 2 | [10,10] |
| chr20:30217134  | TM9SF4   | UTR3        |                                                                                      | + | TtoA | 0.1    | 0.1429 | 3  | 2 | [10,14] |
| chr12:64818213  | TMBIM4   | coding_exon | ENST00000286424:FtoV;ENST00000358230:FtoV;                                           | - | TtoG | 0.1667 | 0.2    | 7  | 3 | [10,20] |
| chr12:64825959  | TMBIM4   | coding_exon |                                                                                      | - | TtoA | 0.1111 | 0.2    | 2  | 2 | [10,18] |
| chr12:48444753  | TMBIM6   | UTR3        |                                                                                      | + | AtoG | 0.125  | 0.1667 | 5  | 3 | [12,16] |
| chr12:48444943  | TMBIM6   | UTR3        |                                                                                      | + | TtoA | 0.1    | 0.125  | 4  | 3 | [10,17] |
| chr17:73634582  | TMC6     | UTR5        |                                                                                      | - | AtoG | 0.125  | 0.1333 | 4  | 2 | [16,17] |
| chr17:73648510  | TMC8     | mixed       |                                                                                      | + | CtoG | 0.1053 | 0.1429 | 6  | 2 | [21,58] |
| chr12:93486056  | TMCC3    | UTR3        |                                                                                      | - | TtoA | 0.1    | 0.1    | 3  | 2 | [10,10] |
| chr12:93486843  | TMCC3    | UTR3        |                                                                                      | - | TtoC | 0.1    | 0.1429 | 3  | 2 | [10,14] |
| chr12:93487576  | TMCC3    | UTR3        |                                                                                      | - | CtoG | 0.1    | 0.1    | 3  | 2 | [10,10] |
| chr12:93487629  | TMCC3    | UTR3        |                                                                                      | - | AtoT | 0.1    | 0.1    | 2  | 2 | [10,10] |
| chr1:163963330  | TMCO1    | UTR3        |                                                                                      | - | TtoA | 0.1    | 0.2    | 3  | 3 | [10,13] |
| chr1:163963423  | TMCO1    | UTR3        |                                                                                      | - | AtoG | 0.1154 | 0.1176 | 3  | 2 | [17,26] |
| chr1:163963586  | TMCO1    | UTR3        |                                                                                      | - | TtoG | 0.1    | 0.25   | 4  | 2 | [16,30] |
| chr13:113250638 | TMCO3    | coding_exon | ENST00000434316:VtoA;                                                                | + | TtoC | 0.1    | 0.1    | 2  | 2 | [10,10] |
| chr1:19881598   | TMCO4    | UTR3        |                                                                                      | - | CtoA | 0.1    | 0.1    | 3  | 2 | [10,20] |
| chr19:10806612  | TMED1    | coding_exon | ENST00000214869:Kto*;                                                                | - | AtoT | 0.1176 | 0.1667 | 3  | 2 | [12,17] |
| chr12:122648347 | TMED2    | UTR3        |                                                                                      | + | CtoT | 0.1176 | 0.3    | 5  | 3 | [10,20] |
| chr12:122648616 | TMED2    | UTR3        |                                                                                      | + | TtoC | 0.1538 | 0.2727 | 5  | 4 | [10,27] |
| chr15:77402236  | TMED3    | mixed       |                                                                                      | + | TtoC | 0.1026 | 0.1429 | 4  | 3 | [14,39] |
| chr7:44585147   | TMED4    | UTR3        |                                                                                      | - | TtoA | 0.1    | 0.1333 | 5  | 2 | [10,15] |
| chr1:93390075   | TMED5    | UTR3        |                                                                                      | - | TtoC | 0.1053 | 0.1667 | 3  | 2 | [12,19] |
| chr5:114978496  | TMED7    | UTR3        |                                                                                      | - | CtoA | 0.1    | 0.1    | 2  | 2 | [10,10] |
| chr5:176955703  | TMED9    | UTR3        |                                                                                      | + | TtoA | 0.1    | 0.3    | 11 | 6 | [10,14] |
| chr17:39444108  | TMEM101  | UTR3        |                                                                                      | - | TtoC | 0.1    | 0.2    | 3  | 3 | [10,11] |
| chr17:39444746  | TMEM101  | UTR3        |                                                                                      | - | TtoG | 0.1    | 0.1818 | 4  | 2 | [11,11] |
| chr17:7279915   | TMEM102  | coding_exon | ENST00000323206:MtoV;ENST00000396568:MtoV;                                           | + | AtoG | 0.1    | 0.1    | 2  | 2 | [10,10] |
| chr17:7279683   | TMEM102  | UTR5        |                                                                                      | + | TtoA | 0.1    | 0.1053 | 2  | 2 | [10,19] |
| chr12:46648732  | TMEM106C | UTR3        |                                                                                      | + | TtoA | 0.1    | 0.1333 | 13 | 4 | [15,53] |
| chr11:60446230  | TMEM109  | mixed       |                                                                                      | + | AtoC | 0.1034 | 0.1818 | 4  | 3 | [11,34] |
| chr3:52864466   | TMEM110  | coding_exon |                                                                                      | - | TtoC | 0.1    | 0.1    | 3  | 2 | [10,10] |
| chr7:75454245   | TMEM120A | UTR3        |                                                                                      | - | AtoG | 0.1429 | 0.1875 | 3  | 2 | [15,16] |
| chr11:101774764 | TMEM123  | UTR3        |                                                                                      | - | TtoA | 0.2273 | 0.2727 | 5  | 2 | [23,24] |
| chr11:85039029  | TMEM126A | coding_exon | ENST00000304511:EtoK;                                                                | + | GtoA | 0.1053 | 0.1667 | 3  | 2 | [12,19] |
| chr11:85045182  | TMEM126A | coding_exon | ENST00000304511:Eto*;                                                                | + | GtoT | 0.1    | 0.1    | 3  | 2 | [10,10] |
| chr11:85022907  | TMEM126B | coding_exon |                                                                                      | + | TtoC | 0.1    | 0.1034 | 2  | 2 | [10,29] |
| chr11:85017308  | TMEM126B | mixed       |                                                                                      | + | GtoT | 0.1    | 0.1905 | 4  | 2 | [10,21] |
| chr2:96284382   | TMEM127  | coding_exon | ENST00000258439:StoP;ENST00000432959:StoP;ENST00000435268:StoP;                      | - | TtoC | 0.1071 | 0.1667 | 6  | 2 | [18,28] |

|                 |              |             |                                                                                                           |   |      |        |        |    |    |          |
|-----------------|--------------|-------------|-----------------------------------------------------------------------------------------------------------|---|------|--------|--------|----|----|----------|
| chr2:96280671   | TMEM127      | UTR3        |                                                                                                           | - | AtoC | 0.1    | 0.1    | 3  | 2  | [10,10]  |
| chr2:97749012   | TMEM131      | coding_exon | ENST00000186436:StoG;ENST00000409062:StoG;ENST00000409721:StoG;ENST00000409721:NtoD;ENST00000409721:StoP; | - | AtoG | 0.1    | 0.1818 | 4  | 2  | [11,22]  |
| chr2:97779138   | TMEM131      | coding_exon | ENST00000186436:NtoD;ENST00000409062:NtoD;ENST00000409721:NtoD;ENST00000409721:StoP;                      | - | AtoG | 0.1    | 0.1    | 4  | 2  | [10,10]  |
| chr2:97779280   | TMEM131      | coding_exon |                                                                                                           | - | AtoG | 0.1818 | 0.1875 | 2  | 2  | [11,16]  |
| chr2:97739987   | TMEM131      | UTR3        |                                                                                                           | - | CtoA | 0.1111 | 0.1333 | 5  | 2  | [15,18]  |
| chr11:60461131  | TMEM132A     | UTR3        |                                                                                                           | + | GtoT | 0.1111 | 0.4    | 4  | 4  | [10,33]  |
| chr11:60461161  | TMEM132A     | UTR3        |                                                                                                           | + | AtoT | 0.1154 | 0.1333 | 11 | 2  | [15,27]  |
| chr11:60888545  | TMEM138      | coding_exon | ENST00000278826:VtoA;ENST00000451389:VtoA;                                                                | + | TtoC | 0.1    | 0.125  | 2  | 2  | [10,16]  |
| chr6:10864792   | TMEM148      | mixed       |                                                                                                           | + | CtoG | 0.1    | 0.1667 | 7  | 3  | [10,16]  |
| chr16:21089346  | TMEM159      | coding_exon | ENST00000233047:StoP;ENST00000261388:StoP;ENST00000451578:StoP;                                           | + | TtoC | 0.1    | 0.125  | 2  | 2  | [16,20]  |
| chr19:19093436  | TMEM161A     | coding_exon | ENST00000162044:VtoG;ENST00000450333:VtoG;                                                                | - | TtoG | 0.1    | 0.1    | 3  | 2  | [10,11]  |
| chr7:112194256  | TMEM168      | UTR3        |                                                                                                           | - | TtoG | 0.1    | 0.1    | 2  | 2  | [10,10]  |
| chr11:62314375  | TMEM179B     | UTR3        |                                                                                                           | + | GtoT | 0.1    | 0.1    | 2  | 2  | [10,10]  |
| chr2:665530     | TMEM18       | coding_exon | ENST00000281017:Itot;ENST00000355654:Itot;ENST00000405941:Itot;                                           | - | TtoC | 0.1    | 0.1111 | 6  | 2  | [10,18]  |
| chr1:201259253  | TMEM183A     | UTR3        |                                                                                                           | + | TtoC | 0.1    | 0.1176 | 5  | 2  | [10,17]  |
| chr20:48180834  | TMEM189      | coding_exon | ENST00000371650:TtoR;ENST00000371652:TtoR;ENST00000371656:TtoR;                                           | - | CtoG | 0.1538 | 0.1667 | 2  | 2  | [12,13]  |
| chr20:48174263  | TMEM189-UBE2 | coding_exon |                                                                                                           | - | TtoG | 0.1333 | 0.2    | 5  | 2  | [10,15]  |
| chr12:70376561  | TMEM19       | coding_exon | ENST00000266673:StoL;ENST00000422859:StoL;                                                                | + | CtoT | 0.1    | 0.1    | 2  | 2  | [10,10]  |
| chr12:70381040  | TMEM19       | coding_exon | ENST00000266673:*toG;                                                                                     | + | TtoG | 0.1    | 0.1    | 2  | 2  | [10,10]  |
| chr12:70383459  | TMEM19       | UTR3        |                                                                                                           | + | GtoC | 0.1    | 0.2667 | 2  | 2  | [10,15]  |
| chr6:130804361  | TMEM200A     | mixed       |                                                                                                           | + | TtoC | 0.1    | 0.2    | 2  | 2  | [10,10]  |
| chr6:130804437  | TMEM200A     | mixed       |                                                                                                           | + | TtoC | 0.1176 | 0.125  | 2  | 2  | [16,17]  |
| chr16:65820512  | TMEM208      | coding_exon |                                                                                                           | + | TtoC | 0.1    | 0.1    | 6  | 2  | [30,31]  |
| chr2:27118048   | TMEM214      | UTR3        |                                                                                                           | + | GtoA | 0.1    | 0.1538 | 3  | 2  | [10,13]  |
| chr11:60922636  | TMEM216      | UTR3        |                                                                                                           | + | AtoG | 0.1    | 0.1    | 3  | 2  | [10,11]  |
| chr1:27534906   | TMEM222      | UTR3        |                                                                                                           | + | AtoG | 0.1    | 0.1    | 2  | 2  | [10,10]  |
| chr1:27535317   | TMEM222      | UTR3        |                                                                                                           | + | AtoC | 0.1429 | 0.15   | 4  | 2  | [20,35]  |
| chr11:62314951  | TMEM223      | coding_exon | ENST00000307366:LtoP;                                                                                     | - | TtoC | 0.1111 | 0.1818 | 3  | 2  | [11,18]  |
| chr11:117920912 | TMEM25       | coding_exon |                                                                                                           | + | TtoC | 0.1    | 0.1    | 3  | 2  | [10,10]  |
| chr1:32313201   | TMEM39B      | mixed       |                                                                                                           | + | TtoC | 0.1    | 0.15   | 2  | 2  | [10,20]  |
| chr1:32340633   | TMEM39B      | mixed       |                                                                                                           | + | AtoC | 0.1    | 0.1    | 4  | 2  | [10,10]  |
| chr3:186692132  | TMEM41A      | mixed       |                                                                                                           | - | AtoG | 0.1    | 0.1667 | 2  | 2  | [10,12]  |
| chr3:186690313  | TMEM41A      | UTR3        |                                                                                                           | - | TtoC | 0.1    | 0.1333 | 3  | 2  | [10,16]  |
| chr3:186690411  | TMEM41A      | UTR3        |                                                                                                           | - | TtoC | 0.1    | 0.1    | 2  | 2  | [10,10]  |
| chr3:186691945  | TMEM41A      | UTR3        |                                                                                                           | - | CtoG | 0.1    | 0.1    | 5  | 2  | [10,10]  |
| chr11:9258931   | TMEM41B      | UTR3        |                                                                                                           | - | TtoA | 0.1    | 0.2    | 3  | 2  | [10,10]  |
| chr3:14159333   | TMEM43       | UTR3        |                                                                                                           | + | AtoC | 0.1    | 0.1333 | 2  | 2  | [10,15]  |
| chr3:195789996  | TMEM44       | UTR3        |                                                                                                           | - | AtoG | 0.1    | 0.1053 | 2  | 2  | [10,19]  |
| chr1:54031515   | TMEM48       | coding_exon | ENST00000360494:VtoA;ENST00000371429:VtoA;                                                                | - | TtoC | 0.1111 | 0.1429 | 3  | 2  | [15,19]  |
| chr1:54003881   | TMEM48       | UTR3        |                                                                                                           | - | AtoG | 0.1    | 0.125  | 4  | 2  | [10,17]  |
| chr1:54006015   | TMEM48       | UTR3        |                                                                                                           | - | TtoA | 0.1    | 0.1    | 2  | 2  | [10,10]  |
| chr1:25559867   | TMEM50A      | UTR3        |                                                                                                           | + | AtoG | 0.129  | 0.1579 | 11 | 2  | [19,31]  |
| chr1:25559996   | TMEM50A      | UTR3        |                                                                                                           | + | AtoC | 0.1    | 0.1765 | 2  | 2  | [10,17]  |
| chr14:19995967  | TMEM55B      | UTR3        |                                                                                                           | - | TtoG | 0.1    | 0.1111 | 3  | 2  | [10,18]  |
| chr7:77261655   | TMEM60       | mixed       |                                                                                                           | - | TtoC | 0.1    | 0.1    | 2  | 2  | [10,10]  |
| chr1:224101458  | TMEM63A      | coding_exon | ENST00000366835:VtoC;                                                                                     | - | AtoG | 0.1    | 0.1    | 2  | 2  | [10,10]  |
| chr1:224100917  | TMEM63A      | UTR3        |                                                                                                           | - | AtoC | 0.1    | 0.1053 | 2  | 2  | [10,19]  |
| chr1:45931502   | TMEM69       | coding_exon | ENST00000372025:RtoG;                                                                                     | + | AtoG | 0.1    | 0.1053 | 2  | 2  | [10,19]  |
| chr1:45932366   | TMEM69       | UTR3        |                                                                                                           | + | CtoG | 0.1538 | 0.4167 | 3  | 2  | [12,13]  |
| chr1:45929325   | TMEM69       | UTR5        |                                                                                                           | + | AtoG | 0.1    | 0.1111 | 2  | 2  | [10,18]  |
| chr8:75056314   | TMEM70       | mixed       |                                                                                                           | + | TtoC | 0.1    | 0.1333 | 4  | 2  | [15,20]  |
| chr1:154529302  | TMEM79       | mixed       |                                                                                                           | + | TtoA | 0.125  | 0.1333 | 4  | 2  | [15,16]  |
| chr15:32309380  | TMEM85       | UTR3        |                                                                                                           | + | AtoC | 0.3333 | 0.36   | 2  | 2  | [12,25]  |
| chr2:112563702  | TMEM87B      | coding_exon | ENST00000283206:VtoG;                                                                                     | + | TtoG | 0.1    | 0.1    | 2  | 2  | [10,10]  |
| chr2:112563713  | TMEM87B      | coding_exon | ENST00000283206:GtoR;                                                                                     | + | GtoA | 0.1    | 0.1538 | 2  | 2  | [10,13]  |
| chr2:112590158  | TMEM87B      | coding_exon |                                                                                                           | + | TtoA | 0.1    | 0.1    | 2  | 2  | [10,10]  |
| chr1:199370968  | TMEM9        | UTR3        |                                                                                                           | - | TtoC | 0.1034 | 0.1053 | 5  | 2  | [19,29]  |
| chr19:46584162  | TMEM91       | coding_exon |                                                                                                           | + | AtoG | 0.1    | 0.1136 | 3  | 2  | [10,46]  |
| chr17:23670508  | TMEM97       | mixed       |                                                                                                           | + | AtoC | 0.1    | 0.125  | 2  | 2  | [10,16]  |
| chr17:36244500  | TMEM99       | mixed       |                                                                                                           | + | TtoA | 0.1    | 0.1111 | 3  | 2  | [10,10]  |
| chr9:99371094   | TMOD1        | coding_exon | ENST00000259365:Atot;ENST00000375175:Atot;ENST00000395211:AtotD;                                          | + | CtoA | 0.1    | 0.1333 | 3  | 2  | [10,15]  |
| chr12:97466038  | TMPO         | UTR3        |                                                                                                           | + | AtoG | 0.1    | 0.1429 | 5  | 2  | [10,14]  |
| chr4:91978817   | TMSL3        | UTR3        |                                                                                                           | - | CtoA | 0.1818 | 0.4737 | 6  | 6  | [11,25]  |
| chr4:91978820   | TMSL3        | UTR3        |                                                                                                           | - | CtoG | 0.4    | 0.7    | 7  | 7  | [10,22]  |
| chr4:91978822   | TMSL3        | UTR3        |                                                                                                           | - | GtoA | 0.1053 | 0.2381 | 7  | 4  | [11,22]  |
| chr4:91978825   | TMSL3        | UTR3        |                                                                                                           | - | TtoC | 0.1667 | 0.2    | 2  | 2  | [10,12]  |
| chr14:50776897  | TMX1         | coding_exon | ENST00000457354:DtoG;                                                                                     | + | AtoG | 0.1034 | 0.3    | 2  | 2  | [10,29]  |
| chr11:57261663  | TMX2         | coding_exon | ENST00000278422:VtoA;ENST00000319399:VtoA;ENST00000378312:VtoA;                                           | + | TtoC | 0.1026 | 0.1471 | 10 | 4  | [34,47]  |
| chr11:57263060  | TMX2         | coding_exon | ENST00000278422:VtoA;ENST00000319399:VtoA;ENST00000378312:VtoA;                                           | + | TtoC | 0.1311 | 0.2373 | 10 | 6  | [59,98]  |
| chr11:57262014  | TMX2         | coding_exon | ENST00000278422:TtoA;ENST00000319399:TtoA;                                                                | + | AtoG | 0.1154 | 0.2917 | 17 | 16 | [10,70]  |
| chr11:57264277  | TMX2         | coding_exon | ENST00000278422:NtoS;ENST00000319399:TtoA;ENST00000378312:NtoS;                                           | + | AtoG | 0.1111 | 0.2222 | 16 | 9  | [25,46]  |
| chr11:57262429  | TMX2         | coding_exon | ENST00000278422:LtoP;ENST00000319399:LtoP;ENST00000378312:LtoP;                                           | + | TtoC | 0.1053 | 0.1765 | 7  | 2  | [17,19]  |
| chr11:57263051  | TMX2         | coding_exon | ENST00000278422:KtoT;ENST00000319399:KtoT;ENST00000378312:KtoT;                                           | + | AtoC | 0.1067 | 0.1373 | 9  | 5  | [51,76]  |
| chr11:57262732  | TMX2         | coding_exon | ENST00000278422:KtoN;ENST00000319399:KtoN;ENST00000378312:KtoN;                                           | + | GtoC | 0.1034 | 0.4762 | 14 | 12 | [21,68]  |
| chr11:57263209  | TMX2         | coding_exon | ENST00000278422:KtoN;ENST00000319399:KtoN;ENST00000378312:KtoN;                                           | + | GtoT | 0.1    | 0.2308 | 13 | 10 | [13,105] |
| chr11:57263268  | TMX2         | coding_exon | ENST00000278422:Itot;ENST00000319399:Itot;ENST00000378312:Itot;                                           | + | TtoC | 0.1    | 0.1176 | 5  | 2  | [34,50]  |
| chr11:57263022  | TMX2         | coding_exon |                                                                                                           | + | AtoG | 0.1017 | 0.2826 | 12 | 10 | [36,96]  |
| chr11:57264200  | TMX2         | coding_exon |                                                                                                           | + | AtoG | 0.12   | 0.25   | 12 | 8  | [14,70]  |
| chr11:57264361  | TMX2         | mixed       |                                                                                                           | + | GtoA | 0.1    | 0.1282 | 12 | 2  | [39,40]  |
| chr11:57264495  | TMX2         | mixed       |                                                                                                           | + | TtoG | 0.12   | 0.1379 | 8  | 2  | [50,58]  |
| chr11:57264520  | TMX2         | mixed       |                                                                                                           | + | TtoC | 0.1    | 0.2093 | 10 | 8  | [20,55]  |
| chr11:57264525  | TMX2         | UTR3        |                                                                                                           | + | CtoT | 0.1    | 0.1458 | 14 | 4  | [10,57]  |
| chr11:57264620  | TMX2         | UTR3        |                                                                                                           | + | GtoC | 0.1111 | 0.1111 | 9  | 2  | [27,36]  |
| chr11:57264655  | TMX2         | UTR3        |                                                                                                           | + | TtoC | 0.1    | 0.1786 | 6  | 4  | [27,36]  |
| chr11:57264754  | TMX2         | UTR3        |                                                                                                           | + | CtoG | 0.1087 | 0.2333 | 11 | 6  | [30,46]  |
| chr11:57264813  | TMX2         | UTR3        |                                                                                                           | + | CtoT | 0.1    | 0.1579 | 8  | 3  | [20,30]  |
| chr11:57264963  | TMX2         | UTR3        |                                                                                                           | + | AtoC | 0.1111 | 0.2    | 12 | 9  | [23,72]  |
| chr11:57264993  | TMX2         | UTR3        |                                                                                                           | + | GtoA | 0.1429 | 0.1667 | 5  | 2  | [12,14]  |
| chr17:23696143  | TNFAIP1      | UTR3        |                                                                                                           | + | TtoC | 0.1    | 0.1    | 5  | 4  | [10,10]  |
| chr14:102662521 | TNFAIP2      | UTR5        |                                                                                                           | + | AtoG | 0.1    | 0.1    | 3  | 2  | [10,10]  |
| chr6:138245696  | TNFAIP3      | UTR3        |                                                                                                           | + | GtoA | 0.1034 | 0.1136 | 6  | 2  | [29,44]  |
| chr5:118757301  | TNFAIP8      | UTR3        |                                                                                                           | + | TtoC | 0.1111 | 0.1111 | 5  | 2  | [27,27]  |
| chr8:22941851   | TNFRSF10B    | coding_exon | ENST00000276431:VtoG;ENST00000347739:VtoG;                                                                | - | TtoG | 0.1071 | 0.2778 | 4  | 2  | [18,28]  |
| chr8:22937706   | TNFRSF10B    | coding_exon | ENST00000276431:Atot;ENST00000347739:Atot;                                                                | - | GtoT | 0.1    | 0.1053 | 2  | 2  | [10,19]  |
| chr1:2479130    | TNFRSF14     | mixed       |                                                                                                           | + | GtoA | 0.4545 | 0.9    | 2  | 2  | [10,11]  |
| chr1:2481124    | TNFRSF14     | mixed       |                                                                                                           | + | GtoT | 0.1831 | 0.6957 | 13 | 13 | [11,88]  |



|                  |          |             |                                                                             |   |      |        |        |    |    |          |
|------------------|----------|-------------|-----------------------------------------------------------------------------|---|------|--------|--------|----|----|----------|
| chr1:2481126     | TNFRSF14 | mixed       |                                                                             | + | TtoC | 0.2857 | 0.75   | 14 | 14 | [13,84]  |
| chr1:2481159     | TNFRSF14 | mixed       |                                                                             | + | CtoA | 0.1111 | 0.2727 | 14 | 11 | [11,62]  |
| chr1:2481272     | TNFRSF14 | mixed       |                                                                             | + | TtoC | 0.1    | 0.1    | 3  | 2  | [10,10]  |
| chr1:2481920     | TNFRSF14 | mixed       |                                                                             | + | GtoC | 0.88   | 1      | 5  | 5  | [10,25]  |
| chr1:2482999     | TNFRSF14 | mixed       |                                                                             | + | AtoG | 0.7647 | 1      | 5  | 5  | [11,38]  |
| chr1:2483161     | TNFRSF14 | mixed       |                                                                             | + | AtoG | 0.102  | 0.4    | 12 | 8  | [11,75]  |
| chr1:2484161     | TNFRSF14 | mixed       |                                                                             | + | GtoC | 1      | 1      | 7  | 7  | [13,25]  |
| chr1:2484509     | TNFRSF14 | mixed       |                                                                             | + | AtoG | 0.1176 | 0.3333 | 5  | 5  | [10,37]  |
| chr1:2484510     | TNFRSF14 | mixed       |                                                                             | + | CtoG | 0.1111 | 0.7857 | 14 | 14 | [11,63]  |
| chr1:1129079     | TNFRSF18 | mixed       |                                                                             | - | TtoC | 1      | 1      | 4  | 4  | [10,52]  |
| chr13:23141023   | TNFRSF19 | coding_exon |                                                                             | + | AtoG | 0.1    | 0.1    | 2  | 2  | [10,10]  |
| chr1:12189688    | TNFRSF1B | UTR3        |                                                                             | + | TtoC | 0.1    | 0.1    | 2  | 2  | [10,10]  |
| chr1:12087127    | TNFRSF8  | coding_exon | ENST00000263932:CtoS;                                                       | + | TtoA | 0.1    | 0.1    | 4  | 2  | [10,21]  |
| chr1:12120884    | TNFRSF8  | mixed       |                                                                             | + | TtoC | 0.4255 | 0.4583 | 2  | 2  | [24,47]  |
| chr1:12126187    | TNFRSF8  | UTR3        |                                                                             | + | GtoC | 1      | 1      | 12 | 12 | [20,114] |
| chr13:42079714   | TNFSF11  | UTR3        |                                                                             | + | GtoA | 0.1    | 0.2    | 2  | 2  | [10,10]  |
| chr1:171421293   | TNFSF4   | UTR3        |                                                                             | - | GtoC | 0.1111 | 0.1333 | 3  | 2  | [15,18]  |
| chr1:171421296   | TNFSF4   | UTR3        |                                                                             | - | AtoG | 0.125  | 0.1579 | 3  | 2  | [16,19]  |
| chr1:171421837   | TNFSF4   | UTR3        |                                                                             | - | TtoG | 0.1    | 0.1    | 4  | 2  | [10,10]  |
| chr3:172377839   | TNIK     | coding_exon | ENST00000284483:TtoP;ENST00000341852:TtoP;ENST00000357327:TtoP;ENST000      | - | AtoC | 0.1    | 0.1379 | 5  | 2  | [10,29]  |
| chr3:172263105   | TNIK     | UTR3        |                                                                             | - | AtoT | 0.1    | 0.1    | 3  | 3  | [10,10]  |
| chr5:150389702   | TNIP1    | UTR3        |                                                                             | - | GtoA | 0.25   | 0.5556 | 3  | 3  | [17,22]  |
| chr5:150424881   | TNIP1    | UTR5        |                                                                             | - | GtoC | 0.1176 | 0.2168 | 12 | 7  | [13,143] |
| chr5:150446840   | TNIP1    | UTR5        |                                                                             | - | AtoG | 0.1127 | 0.35   | 13 | 12 | [11,124] |
| chr5:150446842   | TNIP1    | UTR5        |                                                                             | - | CtoT | 0.1    | 0.1818 | 8  | 2  | [10,22]  |
| chr4:2713203     | TNIP2    | UTR3        |                                                                             | - | TtoG | 0.1    | 0.1    | 2  | 2  | [10,10]  |
| chr5:72224726    | TNPO1    | mixed       |                                                                             | + | TtoG | 0.1    | 0.1111 | 3  | 2  | [10,19]  |
| chr5:72236968    | TNPO1    | mixed       |                                                                             | + | GtoA | 0.1    | 0.1    | 3  | 2  | [10,10]  |
| chr5:72245663    | TNPO1    | UTR3        |                                                                             | + | AtoC | 0.1481 | 0.2143 | 4  | 2  | [14,27]  |
| chr5:72245865    | TNPO1    | UTR3        |                                                                             | + | AtoG | 0.1    | 0.1    | 2  | 2  | [10,10]  |
| chr19:12692719   | TNPO2    | coding_exon | ENST00000356861:TtoP;ENST00000420511:TtoP;ENST00000425528:TtoP;ENST000      | - | AtoC | 0.1667 | 0.3    | 3  | 2  | [10,12]  |
| chr19:12671029   | TNPO2    | UTR3        |                                                                             | - | TtoG | 0.1    | 0.1579 | 2  | 2  | [10,19]  |
| chr16:24708572   | TNRC6A   | mixed       |                                                                             | + | TtoC | 0.1    | 0.1818 | 2  | 2  | [10,11]  |
| chr16:24709958   | TNRC6A   | mixed       |                                                                             | + | TtoC | 0.1    | 0.125  | 7  | 3  | [10,24]  |
| chr16:24710452   | TNRC6A   | mixed       |                                                                             | + | TtoC | 0.1    | 0.1053 | 2  | 2  | [10,20]  |
| chr16:24739039   | TNRC6A   | mixed       |                                                                             | + | TtoC | 0.1    | 0.1    | 4  | 2  | [10,10]  |
| chr16:24742800   | TNRC6A   | UTR3        |                                                                             | + | CtoG | 0.1    | 0.1111 | 3  | 2  | [10,18]  |
| chr16:24743217   | TNRC6A   | UTR3        |                                                                             | + | AtoG | 0.1    | 0.1    | 2  | 2  | [10,10]  |
| chr16:24743220   | TNRC6A   | UTR3        |                                                                             | + | AtoG | 0.1111 | 0.1667 | 5  | 2  | [10,12]  |
| chr16:24744920   | TNRC6A   | UTR3        |                                                                             | + | AtoT | 0.1    | 0.1    | 2  | 2  | [10,10]  |
| chr22:38988075   | TNRC6B   | coding_exon | ENST00000301923:AtoS;ENST00000335727:AtoS;ENST00000400140:AtoS;ENST000      | + | GtoT | 0.1    | 0.1053 | 2  | 2  | [19,20]  |
| chr22:38991047   | TNRC6B   | coding_exon |                                                                             | + | TtoC | 0.1111 | 0.1176 | 3  | 2  | [17,18]  |
| chr22:39051093   | TNRC6B   | UTR3        |                                                                             | + | AtoG | 0.1    | 0.125  | 3  | 2  | [10,16]  |
| chr22:40161496   | TOB2     | mixed       |                                                                             | - | CtoA | 0.1    | 0.1    | 2  | 2  | [10,10]  |
| chr22:40161538   | TOB2     | mixed       |                                                                             | - | AtoG | 0.1    | 0.1    | 3  | 3  | [10,10]  |
| chr1:45580673    | TOE1     | coding_exon | ENST00000372090:TtoP;                                                       | + | AtoC | 0.1    | 0.1    | 2  | 2  | [10,10]  |
| chr1:45581259    | TOE1     | coding_exon | ENST00000372090:StoP;                                                       | + | TtoC | 0.1    | 0.1818 | 2  | 2  | [10,11]  |
| chr1:45581847    | TOE1     | coding_exon |                                                                             | + | CtoT | 0.1333 | 0.1429 | 4  | 2  | [14,15]  |
| chr1:233352271   | TOMM20   | coding_exon | ENST00000366607:LtoR;                                                       | - | TtoG | 0.1176 | 0.1579 | 4  | 2  | [17,19]  |
| chr1:233352272   | TOMM20   | coding_exon | ENST00000366607:LtoI;                                                       | - | CtoA | 0.1111 | 0.1875 | 4  | 2  | [16,18]  |
| chr6:41865601    | TOMM6    | UTR3        |                                                                             | + | AtoG | 0.1026 | 0.2143 | 8  | 3  | [10,39]  |
| chr7:22819117    | TOMM7    | UTR3        |                                                                             | - | TtoA | 0.7778 | 1      | 7  | 7  | [10,22]  |
| chr3:101566086   | TOMM70A  | UTR3        |                                                                             | - | AtoC | 0.1    | 0.1    | 2  | 2  | [10,10]  |
| chr3:101566930   | TOMM70A  | UTR3        |                                                                             | - | TtoG | 0.1    | 0.1111 | 4  | 2  | [18,20]  |
| chr8:144462975   | TOP1MT   | UTR3        |                                                                             | - | TtoG | 0.1    | 0.1    | 2  | 2  | [10,11]  |
| chr17:35799931   | TOP2A    | coding_exon | ENST00000348049:TtoP;ENST00000357601:TtoP;ENST00000423485:TtoP;ENST000      | - | AtoC | 0.1667 | 0.2143 | 5  | 2  | [14,18]  |
| chr17:35818397   | TOP2A    | coding_exon | ENST00000348049:CtoW;ENST00000357601:CtoW;ENST00000423485:CtoW;ENST         | - | TtoG | 0.1053 | 0.1304 | 4  | 3  | [19,51]  |
| chr17:35798427   | TOP2A    | UTR3        |                                                                             | - | TtoC | 0.1667 | 0.2    | 4  | 2  | [11,12]  |
| chr3:25632010    | TOP2B    | coding_exon |                                                                             | - | AtoG | 0.1111 | 0.2    | 7  | 3  | [10,36]  |
| chr3:25636501    | TOP2B    | coding_exon |                                                                             | - | AtoG | 0.1    | 0.1333 | 2  | 2  | [15,20]  |
| chr3:25635806    | TOP2B    | coding_exon |                                                                             | - | TtoC | 0.1    | 0.1    | 2  | 2  | [10,10]  |
| chr17:18124664   | TOP3A    | coding_exon |                                                                             | - | TtoC | 0.1111 | 0.1429 | 3  | 2  | [21,27]  |
| chr22:20643014   | TOP3B    | coding_exon | ENST00000357179:PtoT;ENST00000398789:PtoT;ENST00000398793:PtoT;ENST000      | - | CtoA | 0.1    | 0.1    | 2  | 2  | [10,10]  |
| chr3:134819748   | TOPBP1   | coding_exon |                                                                             | - | GtoA | 0.1    | 0.1667 | 3  | 2  | [10,12]  |
| chr3:134829994   | TOPBP1   | coding_exon |                                                                             | - | AtoG | 0.1    | 0.1111 | 7  | 3  | [10,19]  |
| chr9:131620637   | TOR1A    | coding_exon | ENST00000351698:VtoG;ENST00000427355:VtoG;ENST00000437532:VtoG;             | - | TtoG | 0.1081 | 0.1176 | 3  | 2  | [34,37]  |
| chr1:178144365   | TOR1AIP1 | coding_exon | ENST00000271583:StoP;ENST00000367610:StoP;ENST00000398836:StoP;             | + | TtoC | 0.1    | 0.1    | 2  | 2  | [10,10]  |
| chr1:178101321   | TOR1AIP2 | UTR5        |                                                                             | - | AtoT | 0.1    | 0.1    | 2  | 2  | [10,10]  |
| chr8:59913386    | TOX      | coding_exon |                                                                             | - | GtoA | 0.1    | 0.1333 | 2  | 2  | [10,15]  |
| chr14:21037118   | TOX4     | UTR3        |                                                                             | + | GtoA | 0.1    | 0.1351 | 7  | 4  | [27,50]  |
| chr14:21037119   | TOX4     | UTR3        |                                                                             | + | AtoT | 0.1034 | 0.1515 | 8  | 5  | [28,46]  |
| chr14:21037123   | TOX4     | UTR3        |                                                                             | + | TtoC | 0.1    | 0.1538 | 3  | 2  | [10,13]  |
| chr17:7512915    | TP53     | mixed       |                                                                             | - | GtoA | 0.1081 | 0.1538 | 5  | 2  | [13,37]  |
| chr17:7512918    | TP53     | mixed       |                                                                             | - | TtoC | 0.1    | 0.1346 | 7  | 4  | [16,52]  |
| chr15:41500018   | TP53BP1  | coding_exon |                                                                             | - | TtoC | 0.1    | 0.1    | 2  | 2  | [10,10]  |
| chr15:41511987   | TP53BP1  | coding_exon |                                                                             | - | AtoG | 0.1    | 0.1    | 2  | 2  | [10,20]  |
| chr1:222034730   | TP53BP2  | UTR3        |                                                                             | - | GtoT | 0.1    | 0.1    | 2  | 2  | [10,10]  |
| chr8:96008084    | TP53INP1 | UTR3        |                                                                             | - | AtoG | 0.1    | 0.1111 | 2  | 2  | [10,27]  |
| chr1:3642190     | TP73     | UTR3        |                                                                             | + | AtoG | 0.1    | 0.125  | 2  | 2  | [10,16]  |
| chr12:112214120  | TPCN1    | coding_exon | ENST00000335509:YtoS;ENST00000392569:YtoS;                                  | + | AtoC | 0.15   | 0.1667 | 2  | 2  | [12,20]  |
| chr12:1122190119 | TPCN1    | coding_exon | ENST00000335509:IttoT;ENST00000392569:IttoT;ENST00000428632:IttoT;          | + | TtoC | 0.1    | 0.1176 | 2  | 2  | [10,17]  |
| chr12:112220286  | TPCN1    | UTR3        |                                                                             | + | TtoC | 0.1    | 0.2    | 2  | 2  | [10,10]  |
| chr8:81112650    | TPD52    | UTR3        |                                                                             | - | AtoG | 0.1    | 0.125  | 4  | 2  | [10,16]  |
| chr8:81112762    | TPD52    | UTR3        |                                                                             | - | TtoA | 0.1053 | 0.1538 | 4  | 2  | [13,19]  |
| chr1:152411160   | TPM3     | coding_exon | ENST00000328159:NtoS;ENST00000330188:NtoS;ENST00000341372:NtoS;ENST000      | - | AtoG | 0.1071 | 0.1538 | 7  | 3  | [13,28]  |
| chr1:152411155   | TPM3     | coding_exon | ENST00000328159:KtoE;ENST00000330188:KtoE;ENST00000341372:KtoE;ENST000      | - | AtoG | 0.1429 | 0.2    | 3  | 2  | [10,15]  |
| chr1:152411150   | TPM3     | coding_exon | ENST00000328159:Cto*;ENST00000330188:Cto*;ENST00000341372:Cto*;ENST000      | - | TtoA | 0.1    | 0.1    | 4  | 2  | [10,10]  |
| chr1:152412062   | TPM3     | coding_exon | ENST00000271850:VtoA;ENST00000302206:VtoA;ENST00000312970:VtoA;ENST000      | - | TtoC | 0.1    | 0.1389 | 6  | 2  | [20,37]  |
| chr1:152412281   | TPM3     | coding_exon | ENST00000271850:NtoS;ENST00000302206:NtoS;ENST00000312970:NtoS;ENST000      | - | AtoG | 0.1071 | 0.1176 | 4  | 2  | [17,28]  |
| chr1:152412215   | TPM3     | coding_exon | ENST00000271850:IttoT;ENST00000302206:IttoT;ENST00000312970:IttoT;ENST00000 | - | TtoC | 0.1111 | 0.2308 | 3  | 3  | [13,18]  |
| chr1:152412239   | TPM3     | coding_exon | ENST00000271850:IttoS;ENST00000302206:IttoS;ENST00000312970:IttoS;ENST00000 | - | TtoG | 0.1    | 0.3    | 6  | 2  | [10,10]  |
| chr1:152412243   | TPM3     | coding_exon | ENST00000271850:EtoK;ENST00000302206:EtoK;ENST00000312970:EtoK;ENST000      | - | GtoA | 0.1071 | 0.1429 | 10 | 4  | [14,28]  |
| chr1:152422191   | TPM3     | mixed       |                                                                             | - | TtoG | 0.1136 | 0.1698 | 7  | 3  | [55,98]  |
| chr1:152422288   | TPM3     | mixed       |                                                                             | - | TtoG | 0.1    | 0.1333 | 6  | 3  | [15,41]  |
| chr6:18257293    | TPMT     | coding_exon | ENST00000309983:DtoE;                                                       | - | TtoA | 0.1    | 0.1    | 4  | 2  | [10,10]  |
| chr13:102099337  | TPP2     | coding_exon | ENST00000376052:LtoH;ENST00000376065:LtoH;                                  | + | TtoA | 0.1053 | 0.2    | 2  | 2  | [10,19]  |

|                 |          |             |                                                                                      |   |      |        |        |    |    |          |
|-----------------|----------|-------------|--------------------------------------------------------------------------------------|---|------|--------|--------|----|----|----------|
| chr13:102124646 | TPP2     | coding_exon | ENST00000376052:KtoN;ENST00000376065:KtoN;                                           | + | AtoT | 0.1111 | 0.1304 | 7  | 2  | [23,27]  |
| chr13:102088664 | TPP2     | coding_exon |                                                                                      | + | AtoG | 0.125  | 0.1579 | 5  | 2  | [16,19]  |
| chr1:184570123  | TPR      | coding_exon |                                                                                      | - | AtoG | 0.1    | 0.1333 | 4  | 2  | [10,15]  |
| chr1:184579723  | TPR      | coding_exon |                                                                                      | - | TtoC | 0.1053 | 0.1818 | 7  | 3  | [11,26]  |
| chr2:73817938   | TPRKB    | UTR5        |                                                                                      | - | TtoA | 0.1111 | 0.25   | 7  | 7  | [11,21]  |
| chr2:73817939   | TPRKB    | UTR5        |                                                                                      | - | AtoT | 0.1333 | 0.2222 | 7  | 7  | [11,25]  |
| chr22:25258688  | TPST2    | coding_exon |                                                                                      | - | AtoC | 0.1    | 0.1176 | 2  | 2  | [10,17]  |
| chr22:25252230  | TPST2    | UTR3        |                                                                                      | - | TtoC | 0.1111 | 0.12   | 5  | 3  | [17,25]  |
| chr13:44809009  | TPT1     | mixed       |                                                                                      | - | TtoC | 0.1053 | 0.1923 | 13 | 6  | [13,39]  |
| chr13:44809310  | TPT1     | mixed       |                                                                                      | - | TtoA | 0.1268 | 0.1887 | 10 | 4  | [55,149] |
| chr13:44809311  | TPT1     | mixed       |                                                                                      | - | TtoA | 0.1176 | 0.3857 | 16 | 6  | [52,160] |
| chr7:23512284   | TRA2A    | coding_exon | ENST00000297071:Yto*;                                                                | - | CtoA | 0.1087 | 0.125  | 9  | 2  | [47,56]  |
| chr7:23510965   | TRA2A    | UTR3        |                                                                                      | - | TtoC | 0.1    | 0.1    | 7  | 2  | [10,10]  |
| chr3:187117952  | TRA2B    | UTR3        |                                                                                      | - | TtoA | 0.1    | 0.1304 | 6  | 2  | [20,23]  |
| chr14:22086302  | TRAC     | coding_exon | ENST00000442641:DtoA;ENST00000452868:DtoA;                                           | + | AtoC | 0.1    | 0.1    | 2  | 2  | [11,20]  |
| chr14:22064519  | TRAC     | coding_exon |                                                                                      | + | TtoA | 0.3889 | 0.9    | 2  | 2  | [10,18]  |
| chr14:22090527  | TRAC     | UTR3        |                                                                                      | + | TtoG | 0.1    | 0.2609 | 5  | 4  | [14,23]  |
| chr14:22090531  | TRAC     | UTR3        |                                                                                      | + | CtoA | 0.1625 | 0.4118 | 9  | 8  | [17,80]  |
| chr14:22090659  | TRAC     | UTR3        |                                                                                      | + | AtoG | 0.1071 | 0.2    | 3  | 2  | [20,28]  |
| chr14:22090663  | TRAC     | UTR3        |                                                                                      | + | CtoT | 0.1053 | 0.4211 | 7  | 7  | [19,39]  |
| chr14:22090937  | TRAC     | UTR3        |                                                                                      | + | AtoG | 0.1333 | 0.6    | 4  | 4  | [10,25]  |
| chr9:122706067  | TRAF1    | UTR3        |                                                                                      | - | TtoA | 0.1136 | 0.119  | 4  | 2  | [42,46]  |
| chr9:122706090  | TRAF1    | UTR3        |                                                                                      | - | AtoG | 0.1558 | 0.2941 | 11 | 10 | [17,77]  |
| chr9:122728248  | TRAF1    | UTR5        |                                                                                      | - | CtoT | 0.1176 | 0.1379 | 4  | 2  | [17,29]  |
| chr9:122728838  | TRAF1    | UTR5        |                                                                                      | - | TtoC | 0.1    | 0.1818 | 3  | 2  | [10,11]  |
| chr9:122730531  | TRAF1    | UTR5        |                                                                                      | - | TtoG | 0.1    | 0.1    | 3  | 2  | [10,10]  |
| chr6:111986886  | TRAF3IP2 | UTR3        |                                                                                      | - | TtoC | 0.1    | 0.1333 | 5  | 4  | [10,16]  |
| chr1:208003344  | TRAF3IP3 | mixed       |                                                                                      | + | TtoG | 0.1    | 0.1    | 3  | 2  | [20,20]  |
| chr1:209612973  | TRAF5    | UTR3        |                                                                                      | + | GtoA | 0.1    | 0.1    | 2  | 2  | [10,10]  |
| chr1:209614039  | TRAF5    | UTR3        |                                                                                      | + | AtoG | 0.1    | 0.1667 | 6  | 3  | [10,26]  |
| chr16:2166941   | TRAF7    | UTR3        |                                                                                      | + | GtoA | 0.1    | 0.1364 | 10 | 4  | [10,30]  |
| chr16:2166945   | TRAF7    | UTR3        |                                                                                      | + | TtoG | 0.1765 | 0.2308 | 2  | 2  | [14,17]  |
| chr3:42226478   | TRAK1    | coding_exon | ENST00000327628:StoT;ENST00000341421:StoT;ENST00000396175:StoT;                      | + | TtoA | 0.1    | 0.1    | 4  | 2  | [20,20]  |
| chr2:201959283  | TRAK2    | coding_exon |                                                                                      | - | TtoC | 0.1    | 0.2    | 3  | 2  | [10,10]  |
| chr2:201959354  | TRAK2    | coding_exon |                                                                                      | - | TtoC | 0.1    | 0.1    | 2  | 2  | [10,10]  |
| chr8:71649744   | TRAM1    | coding_exon | ENST00000262213:NtoD;                                                                | - | AtoG | 0.1    | 0.1667 | 8  | 3  | [10,20]  |
| chr8:71649751   | TRAM1    | coding_exon |                                                                                      | - | TtoC | 0.1    | 0.1333 | 5  | 3  | [15,20]  |
| chr8:71649690   | TRAM1    | UTR3        |                                                                                      | - | AtoG | 0.1667 | 0.1667 | 3  | 2  | [12,12]  |
| chr8:71649695   | TRAM1    | UTR3        |                                                                                      | - | TtoC | 0.1364 | 0.2    | 4  | 2  | [10,22]  |
| chr21:44331164  | TRAPPC10 | coding_exon | ENST00000291574:HtoD;                                                                | + | CtoG | 0.1    | 0.1    | 3  | 2  | [10,10]  |
| chr21:44348551  | TRAPPC10 | UTR3        |                                                                                      | + | AtoG | 0.1667 | 0.1667 | 8  | 2  | [12,24]  |
| chr21:44348578  | TRAPPC10 | UTR3        |                                                                                      | + | TtoC | 0.1    | 0.2    | 5  | 3  | [10,15]  |
| chr21:44348825  | TRAPPC10 | UTR3        |                                                                                      | + | TtoA | 0.1    | 0.1111 | 5  | 2  | [18,20]  |
| chr1:36375039   | TRAPPC3  | UTR3        |                                                                                      | - | TtoC | 0.1    | 0.1538 | 8  | 2  | [26,30]  |
| chr19:7653738   | TRAPPC5  | coding_exon | ENST00000317378:PtoR;ENST00000426877:PtoR;ENST00000452406:PtoR;                      | + | CtoG | 0.1    | 0.1818 | 5  | 3  | [10,16]  |
| chr19:50358031  | TRAPPC6A | UTR3        |                                                                                      | - | AtoG | 0.1    | 0.125  | 4  | 2  | [10,17]  |
| chr19:50358032  | TRAPPC6A | UTR3        |                                                                                      | - | AtoG | 0.1176 | 0.2222 | 7  | 3  | [10,22]  |
| chr8:141476920  | TRAPPC9  | coding_exon | ENST00000301226:VtoD;ENST00000389327:VtoD;ENST00000389328:VtoD;ENST00000389329:VtoD; | - | TtoA | 0.1    | 0.1    | 2  | 2  | [10,10]  |
| chr8:141379822  | TRAPPC9  | coding_exon | ENST00000301226:StoP;ENST00000389327:StoP;ENST00000389328:StoP;ENST00000389329:StoP; | - | TtoC | 0.125  | 0.1429 | 3  | 2  | [14,16]  |
| chr6:41267629   | TREML2   | UTR3        |                                                                                      | - | TtoA | 0.1    | 0.1    | 2  | 2  | [10,10]  |
| chr6:42312059   | TRETF1   | coding_exon |                                                                                      | - | AtoG | 0.1    | 0.1429 | 3  | 2  | [10,14]  |
| chr3:48482845   | TREX1    | UTR5        |                                                                                      | + | TtoA | 0.1    | 0.1667 | 2  | 2  | [10,12]  |
| chr8:126515030  | TRIB1    | coding_exon | ENST00000311922:EtoA;                                                                | + | AtoC | 0.1    | 0.2273 | 5  | 2  | [10,22]  |
| chr8:126515031  | TRIB1    | coding_exon |                                                                                      | + | GtoA | 0.1    | 0.2759 | 3  | 2  | [10,29]  |
| chr8:126517907  | TRIB1    | UTR3        |                                                                                      | + | TtoC | 0.1    | 0.1    | 2  | 2  | [10,10]  |
| chr8:126518926  | TRIB1    | UTR3        |                                                                                      | + | TtoC | 0.1    | 0.1579 | 5  | 3  | [10,19]  |
| chr20:324969    | TRIB3    | coding_exon | ENST00000217233:StoP;ENST00000422053:StoP;                                           | + | TtoC | 0.1    | 0.1111 | 2  | 2  | [10,10]  |
| chr1:226648685  | TRIM11   | UTR3        |                                                                                      | - | TtoC | 0.1    | 0.1    | 2  | 2  | [10,10]  |
| chr13:49485011  | TRIM13   | coding_exon | ENST00000298772:WtoR;ENST00000356017:WtoR;ENST00000420995:WtoR;                      | + | TtoC | 0.1    | 0.2    | 6  | 3  | [10,16]  |
| chr11:4362819   | TRIM21   | UTR3        |                                                                                      | - | GtoT | 0.1    | 0.1176 | 3  | 2  | [10,17]  |
| chr11:5687113   | TRIM22   | coding_exon | ENST00000379965:FtoI;ENST00000455293:FtoI;                                           | + | TtoA | 0.1    | 0.2    | 8  | 3  | [26,40]  |
| chr11:5688321   | TRIM22   | UTR3        |                                                                                      | + | TtoC | 0.1    | 0.12   | 5  | 2  | [10,25]  |
| chr7:137920843  | TRIM24   | mixed       |                                                                                      | + | AtoG | 0.1    | 0.2308 | 6  | 3  | [10,14]  |
| chr17:52328287  | TRIM25   | coding_exon |                                                                                      | - | TtoA | 0.1111 | 0.1429 | 8  | 3  | [18,21]  |
| chr17:52321345  | TRIM25   | UTR3        |                                                                                      | - | TtoG | 0.1    | 0.3571 | 4  | 3  | [10,14]  |
| chr17:52321523  | TRIM25   | UTR3        |                                                                                      | - | TtoA | 0.1    | 0.1538 | 4  | 2  | [10,13]  |
| chr17:52322250  | TRIM25   | UTR3        |                                                                                      | - | TtoC | 0.1667 | 0.3    | 8  | 3  | [11,12]  |
| chr6:30262240   | TRIM26   | coding_exon | ENST00000437089:TtoP;ENST00000453195:TtoP;ENST00000454678:TtoP;                      | - | AtoC | 0.1111 | 0.1818 | 3  | 2  | [11,18]  |
| chr6:28978802   | TRIM27   | UTR3        |                                                                                      | - | GtoA | 0.1    | 0.1176 | 5  | 2  | [10,17]  |
| chr19:63751305  | TRIM28   | coding_exon |                                                                                      | + | TtoC | 0.9964 | 1      | 13 | 13 | [12,457] |
| chr1:114771400  | TRIM33   | coding_exon | ENST00000358465:DtoY;ENST00000369543:DtoY;ENST00000450349:DtoY;                      | - | GtoT | 0.1    | 0.125  | 2  | 2  | [10,16]  |
| chr1:114741396  | TRIM33   | UTR3        |                                                                                      | - | TtoC | 0.1    | 0.1364 | 3  | 2  | [20,22]  |
| chr11:5620229   | TRIM34   | coding_exon | ENST00000354852:LtoR;ENST00000380089:LtoR;ENST00000396866:LtoR;                      | + | TtoG | 0.1    | 0.1176 | 3  | 2  | [10,18]  |
| chr8:27207575   | TRIM35   | coding_exon | ENST00000305364:LtoP;ENST00000380544:LtoP;                                           | - | TtoC | 0.1111 | 0.1429 | 3  | 2  | [14,18]  |
| chr17:54464226  | TRIM37   | coding_exon | ENST00000262294:StoR;ENST00000376149:StoR;ENST00000393066:StoR;                      | - | CtoA | 0.1    | 0.1    | 2  | 2  | [10,10]  |
| chr17:54493232  | TRIM37   | coding_exon | ENST00000262294:RtoQ;ENST00000376149:RtoQ;ENST00000393066:RtoQ;                      | - | GtoA | 0.1    | 0.1    | 2  | 2  | [10,10]  |
| chr17:54473958  | TRIM37   | coding_exon | ENST00000262294:AtoG;ENST00000376149:AtoG;ENST00000393066:AtoG;                      | - | CtoG | 0.1    | 0.1    | 2  | 2  | [10,10]  |
| chr6:26092511   | TRIM38   | UTR3        |                                                                                      | + | TtoC | 0.1429 | 0.1818 | 2  | 2  | [11,14]  |
| chr5:180594306  | TRIM41   | coding_exon |                                                                                      | + | TtoG | 0.1    | 0.1429 | 2  | 2  | [10,14]  |
| chr5:180583543  | TRIM41   | UTR5        |                                                                                      | + | TtoC | 0.1    | 0.1667 | 2  | 2  | [10,12]  |
| chr11:35785193  | TRIM44   | UTR3        |                                                                                      | + | GtoA | 0.1    | 0.125  | 5  | 3  | [10,18]  |
| chr11:5642188   | TRIM5    | mixed       |                                                                                      | - | TtoG | 0.1    | 0.1379 | 5  | 2  | [11,29]  |
| chr11:5642304   | TRIM5    | mixed       |                                                                                      | - | TtoC | 0.1    | 0.1    | 2  | 2  | [10,10]  |
| chr5:180615158  | TRIM52   | UTR3        |                                                                                      | - | TtoC | 0.1    | 0.1    | 2  | 2  | [10,10]  |
| chr7:100518122  | TRIM56   | mixed       |                                                                                      | + | AtoG | 0.1154 | 0.1667 | 2  | 2  | [12,26]  |
| chr7:100519861  | TRIM56   | mixed       |                                                                                      | + | AtoC | 0.1    | 0.2727 | 2  | 2  | [10,11]  |
| chr17:71400176  | TRIM65   | coding_exon | ENST00000269383:NtoD;                                                                | - | AtoG | 0.1    | 0.2    | 2  | 2  | [10,10]  |
| chr11:4577424   | TRIM68   | UTR3        |                                                                                      | - | TtoA | 0.1    | 0.1    | 2  | 2  | [10,10]  |
| chr15:42835949  | TRIM69   | coding_exon | ENST00000329464:HtoP;ENST00000338264:HtoP;                                           | + | AtoC | 0.1    | 0.1    | 2  | 2  | [10,10]  |
| chr15:42838344  | TRIM69   | coding_exon |                                                                                      | + | AtoG | 0.2    | 0.2    | 5  | 2  | [10,10]  |
| chr5:14454138   | TRIO     | coding_exon | ENST00000344204:RtoG;                                                                | + | AtoG | 0.1818 | 0.1818 | 4  | 2  | [11,11]  |
| chr5:14440693   | TRIO     | coding_exon |                                                                                      | + | GtoA | 0.1    | 0.1    | 2  | 2  | [10,10]  |
| chr5:14562061   | TRIO     | UTR3        |                                                                                      | + | AtoG | 0.1071 | 0.1818 | 5  | 2  | [11,28]  |
| chr22:36495094  | TRIOBP   | coding_exon | ENST00000403663:LtoR;ENST00000406386:LtoR;                                           | + | TtoG | 0.1    | 0.1818 | 2  | 2  | [10,11]  |
| chr2:230366078  | TRIP12   | coding_exon |                                                                                      | - | TtoG | 0.125  | 0.1429 | 2  | 2  | [14,16]  |
| chr2:230378826  | TRIP12   | coding_exon |                                                                                      | - | TtoC | 0.1176 | 0.125  | 4  | 2  | [16,17]  |

|                 |          |             |                                                                          |   |      |        |        |    |    |           |
|-----------------|----------|-------------|--------------------------------------------------------------------------|---|------|--------|--------|----|----|-----------|
| chr5:970673     | TRIP13   | UTR3        |                                                                          | + | AtoG | 0.1    | 0.1818 | 5  | 3  | [10,19]   |
| chr15:62503283  | TRIP4    | coding_exon | ENST00000261884:RtoS;                                                    | + | GtoT | 0.1    | 0.1    | 2  | 2  | [10,10]   |
| chr1:40082465   | TRIT1    | coding_exon | ENST00000046894:TtoP;ENST00000316891:TtoP;ENST00000372818:TtoP;ENST000   | - | AtoC | 0.1    | 0.3    | 6  | 5  | [10,19]   |
| chr1:40082466   | TRIT1    | coding_exon |                                                                          | - | TtoC | 0.2143 | 0.25   | 3  | 2  | [12,14]   |
| chr1:40079821   | TRIT1    | UTR3        |                                                                          | - | GtoC | 0.1    | 0.1    | 2  | 2  | [10,11]   |
| chr11:63841598  | TRMT112  | UTR5        |                                                                          | - | CtoT | 0.1053 | 0.2    | 4  | 2  | [10,21]   |
| chr22:18482600  | TRMT2A   | coding_exon | ENST00000252136:StoC;ENST00000403707:StoC;ENST00000404751:StoC;ENST000   | - | CtoG | 0.1111 | 0.1333 | 3  | 2  | [15,18]   |
| chr14:103071673 | TRMT61A  | UTR3        |                                                                          | + | TtoC | 0.1538 | 0.1667 | 2  | 2  | [12,13]   |
| chr1:28763847   | TRNAU1AP | coding_exon |                                                                          | + | TtoC | 0.4545 | 0.5    | 3  | 3  | [20,41]   |
| chr3:3145769    | TRNT1    | coding_exon |                                                                          | + | TtoC | 0.1    | 0.125  | 5  | 2  | [10,16]   |
| chr12:48004250  | TROAP    | coding_exon | ENST00000380327:PtoL;                                                    | + | CtoT | 0.1    | 0.1    | 2  | 2  | [10,10]   |
| chr12:48009104  | TROAP    | coding_exon | ENST00000257909:LtoQ;                                                    | + | TtoA | 0.1333 | 0.1667 | 3  | 2  | [12,15]   |
| chr1:191327453  | TROVE2   | UTR3        |                                                                          | + | TtoC | 0.1    | 0.1429 | 3  | 3  | [10,14]   |
| chr11:63747878  | TRPT1    | UTR3        |                                                                          | - | AtoT | 0.1111 | 0.5    | 3  | 3  | [13,18]   |
| chr7:98440883   | TRRAP    | coding_exon | ENST00000355540:TtoS;ENST00000359863:TtoS;ENST00000446306:TtoS;          | + | AtoT | 0.1    | 0.1429 | 5  | 2  | [20,21]   |
| chr7:98385762   | TRRAP    | coding_exon | ENST00000355540:LtoM;ENST00000359863:LtoM;ENST00000446306:LtoM;          | + | CtoA | 0.1    | 0.1    | 2  | 2  | [10,10]   |
| chr7:98419917   | TRRAP    | coding_exon |                                                                          | + | GtoA | 0.1538 | 0.1818 | 2  | 2  | [11,13]   |
| chr9:134766013  | TSC1     | coding_exon | ENST00000298552:MtoI;ENST00000440111:MtoI;                               | - | GtoT | 0.1    | 0.1    | 2  | 2  | [10,10]   |
| chr9:134757546  | TSC1     | UTR3        |                                                                          | - | AtoC | 0.1    | 0.1    | 2  | 2  | [10,10]   |
| chr19:59389129  | TSEN34   | mixed       |                                                                          | + | TtoC | 0.1    | 0.125  | 7  | 3  | [16,20]   |
| chr2:122239660  | TSN      | UTR3        |                                                                          | + | TtoC | 0.1    | 0.1111 | 4  | 2  | [10,18]   |
| chr2:122241860  | TSN      | UTR3        |                                                                          | + | TtoC | 0.1    | 0.2    | 2  | 2  | [10,10]   |
| chr10:82268927  | TSPAN14  | mixed       |                                                                          | + | AtoC | 0.1    | 0.2    | 2  | 2  | [10,10]   |
| chr10:82270930  | TSPAN14  | UTR3        |                                                                          | + | TtoG | 0.1    | 0.1    | 2  | 2  | [10,10]   |
| chr12:56425874  | TSPAN31  | coding_exon | ENST00000257910:GtoE;                                                    | + | GtoA | 0.1111 | 0.1111 | 2  | 2  | [18,18]   |
| chr12:56426683  | TSPAN31  | coding_exon |                                                                          | + | TtoC | 0.1    | 0.1176 | 3  | 2  | [17,30]   |
| chr6:116705493  | TSPYL1   | mixed       |                                                                          | - | TtoC | 0.125  | 0.4    | 4  | 2  | [10,32]   |
| chr6:116678345  | TSPYL5   | UTR3        |                                                                          | - | TtoC | 0.1    | 0.1    | 2  | 2  | [10,10]   |
| chr2:3171809    | TSSC1    | UTR3        |                                                                          | - | TtoC | 0.1111 | 0.2143 | 2  | 2  | [10,14]   |
| chr5:159409183  | TTC1     | coding_exon | ENST00000231238:LtoP;                                                    | + | TtoC | 0.1    | 0.1176 | 9  | 3  | [11,34]   |
| chr5:159425080  | TTC1     | UTR3        |                                                                          | + | TtoC | 0.1333 | 0.1944 | 8  | 2  | [15,36]   |
| chr1:229156761  | TTC13    | coding_exon | ENST00000366661:VtoL;ENST00000366662:VtoL;ENST00000414259:VtoL;          | - | GtoC | 0.1    | 0.1    | 2  | 2  | [10,10]   |
| chr1:229108707  | TTC13    | UTR3        |                                                                          | - | TtoC | 0.1    | 0.1    | 3  | 2  | [10,10]   |
| chr2:3362545    | TTC15    | UTR5        |                                                                          | + | CtoA | 0.3571 | 0.5833 | 2  | 2  | [12,14]   |
| chr11:43379671  | TTC17    | coding_exon | ENST0000039989:VtoA;ENST00000299240:VtoA;                                | + | TtoC | 0.1    | 0.1    | 3  | 2  | [10,10]   |
| chr11:43421492  | TTC17    | coding_exon | ENST0000039989:NtoD;ENST00000299240:NtoD;                                | + | AtoG | 0.1538 | 0.25   | 5  | 2  | [12,13]   |
| chr11:43385591  | TTC17    | coding_exon | ENST0000039989:LtoH;ENST00000299240:LtoH;                                | + | TtoA | 0.1    | 0.1    | 3  | 2  | [10,10]   |
| chr11:43429389  | TTC17    | coding_exon | ENST0000039989:KtoQ;                                                     | + | AtoC | 0.1    | 0.1111 | 3  | 2  | [10,18]   |
| chr11:43383663  | TTC17    | coding_exon |                                                                          | + | TtoA | 0.1    | 0.1176 | 3  | 2  | [10,17]   |
| chr17:15869086  | TTC19    | coding_exon | ENST00000261647:LtoS;ENST00000395886:LtoS;                               | + | TtoC | 0.1    | 0.1    | 2  | 2  | [10,10]   |
| chr17:15872746  | TTC19    | mixed       |                                                                          | + | TtoC | 0.1    | 0.1    | 5  | 2  | [10,10]   |
| chr2:32781430   | TTC27    | coding_exon | ENST00000317907:LtoP;                                                    | + | TtoC | 0.1    | 0.1111 | 3  | 2  | [18,20]   |
| chr21:37382487  | TTC3     | coding_exon |                                                                          | + | AtoC | 0.1    | 0.1333 | 2  | 2  | [10,15]   |
| chr2:74571304   | TTC31    | coding_exon | ENST00000233623:LtoR;ENST00000410003:LtoR;ENST00000441635:LtoR;ENST000   | + | TtoG | 0.1    | 0.1    | 3  | 2  | [10,10]   |
| chr2:74564044   | TTC31    | mixed       |                                                                          | + | AtoG | 0.1    | 0.1818 | 2  | 2  | [10,11]   |
| chr5:94831285   | TTC37    | coding_exon | ENST00000358746:VtoG;                                                    | - | TtoG | 0.1429 | 0.25   | 7  | 4  | [13,17]   |
| chr5:94839858   | TTC37    | coding_exon |                                                                          | - | AtoG | 0.1    | 0.1053 | 2  | 2  | [19,21]   |
| chr5:94878511   | TTC37    | coding_exon |                                                                          | - | TtoC | 0.1    | 0.2    | 5  | 2  | [10,10]   |
| chr22:45048594  | TTC38    | coding_exon | ENST00000381031:QtoL;ENST00000445282:QtoL;                               | + | AtoT | 0.1    | 0.1    | 3  | 2  | [10,10]   |
| chr14:70204058  | TTC9     | coding_exon | ENST00000256367:VtoA;                                                    | + | TtoC | 0.1    | 0.1333 | 3  | 2  | [10,15]   |
| chr14:70209015  | TTC9     | UTR3        |                                                                          | + | TtoG | 0.1    | 0.25   | 3  | 3  | [10,12]   |
| chr1:117446471  | TTF2     | UTR3        |                                                                          | + | AtoT | 0.1    | 0.1538 | 3  | 2  | [10,27]   |
| chr1:117446472  | TTF2     | UTR3        |                                                                          | + | CtoG | 0.1034 | 0.1892 | 2  | 2  | [29,37]   |
| chr3:9845644    | TTL3     | coding_exon | ENST00000336674:NtoK;ENST00000383827:NtoK;ENST00000397241:NtoK;ENST000   | + | CtoG | 0.1    | 0.2    | 6  | 3  | [10,25]   |
| chr3:9836868    | TTL3     | mixed       |                                                                          | + | GtoA | 0.1    | 0.5    | 2  | 2  | [10,18]   |
| chr3:9851962    | TTL3     | mixed       |                                                                          | + | TtoG | 0.1333 | 0.2143 | 2  | 2  | [15,15]   |
| chr3:9852063    | TTL3     | mixed       |                                                                          | + | CtoG | 0.1111 | 0.2    | 2  | 2  | [10,10]   |
| chr2:219320123  | TTL4     | coding_exon | ENST00000258398:WtoG;ENST00000392102:WtoG;ENST00000457313:WtoG;          | + | TtoG | 0.1    | 0.1    | 4  | 2  | [10,10]   |
| chr2:219320620  | TTL4     | coding_exon | ENST00000258398:VtoD;ENST00000392102:VtoD;ENST00000442769:VtoD;ENST000   | + | TtoA | 0.1    | 0.1538 | 3  | 2  | [10,13]   |
| chr2:219325818  | TTL4     | coding_exon | ENST00000258398:QtoL;ENST00000392102:QtoL;ENST00000442769:QtoL;ENST000   | + | AtoT | 0.1    | 0.1053 | 5  | 2  | [10,19]   |
| chr2:219323031  | TTL4     | coding_exon | ENST00000258398:LtoI;ENST00000392102:LtoI;ENST00000442769:LtoI;ENST00000 | + | CtoA | 0.1    | 0.1    | 3  | 2  | [10,10]   |
| chr2:219320598  | TTL4     | coding_exon | ENST00000258398:KtoQ;ENST00000392102:KtoQ;ENST00000442769:KtoQ;ENST000   | + | AtoC | 0.1    | 0.1111 | 4  | 2  | [10,18]   |
| chr14:75418959  | TTL5     | coding_exon | ENST00000286653:Etog;ENST00000298832:Etog;ENST00000393826:Etog;ENST000   | + | AtoG | 0.1    | 0.1    | 2  | 2  | [10,10]   |
| chr14:75490797  | TTL5     | UTR3        |                                                                          | + | AtoC | 0.1    | 0.2    | 2  | 2  | [10,10]   |
| chr6:24759129   | TRAP     | coding_exon | ENST00000341060:FtoV;ENST00000378198:FtoV;                               | - | TtoG | 0.1176 | 0.3077 | 2  | 2  | [13,17]   |
| chr7:2670787    | TTYH3    | UTR3        |                                                                          | + | AtoG | 0.1    | 0.1053 | 2  | 2  | [19,20]   |
| chr2:219823757  | TUBA1    | coding_exon | ENST00000248437:VtoG;ENST0000032858:*toE;ENST00000392088:VtoG;           | - | TtoG | 0.1    | 0.1579 | 5  | 2  | [10,19]   |
| chr2:219823647  | TUBA1    | coding_exon | ENST00000248437:StoG;ENST00000392088:StoG;                               | - | AtoG | 0.1333 | 0.15   | 3  | 3  | [21,32]   |
| chr2:219823746  | TUBA1    | coding_exon | ENST00000248437:PtoT;ENST00000392088:PtoT;                               | - | CtoA | 0.1053 | 0.1111 | 4  | 2  | [19,19]   |
| chr2:219823379  | TUBA1    | coding_exon | ENST00000248437:Etog;ENST00000392088:Etog;                               | - | AtoG | 0.1019 | 0.1161 | 2  | 2  | [110,159] |
| chr2:219823744  | TUBA1    | coding_exon |                                                                          | - | CtoT | 0.1304 | 0.1818 | 6  | 3  | [18,23]   |
| chr2:219823747  | TUBA1    | coding_exon |                                                                          | - | TtoC | 0.1    | 0.1429 | 11 | 4  | [10,19]   |
| chr12:47953350  | TUBA1C   | mixed       |                                                                          | + | TtoA | 0.2    | 0.3333 | 3  | 2  | [10,16]   |
| chr12:47953351  | TUBA1C   | mixed       |                                                                          | + | AtoG | 0.1875 | 0.4167 | 5  | 5  | [10,26]   |
| chr22:16993661  | TUBA8    | coding_exon | ENST00000316027:KtoE;ENST00000330423:KtoE;                               | + | AtoG | 0.1    | 0.1429 | 2  | 2  | [10,14]   |
| chr6:3098927    | TUBB2A   | UTR3        |                                                                          | - | TtoA | 0.1    | 0.1    | 2  | 2  | [10,10]   |
| chr6:3172731    | TUBB2B   | coding_exon | ENST00000259818:Itot;                                                    | - | AtoC | 0.2143 | 0.2941 | 2  | 2  | [14,18]   |
| chr6:3169822    | TUBB2B   | UTR3        |                                                                          | - | CtoT | 0.1875 | 0.6    | 10 | 10 | [10,81]   |
| chr6:3169832    | TUBB2B   | UTR3        |                                                                          | - | TtoC | 0.1    | 0.3171 | 9  | 8  | [10,61]   |
| chr6:3169833    | TUBB2B   | UTR3        |                                                                          | - | CtoA | 0.1176 | 0.122  | 5  | 2  | [17,42]   |
| chr9:139257264  | TUBB2C   | coding_exon | ENST00000340384:VtoA;                                                    | + | TtoC | 0.1739 | 0.2188 | 7  | 2  | [24,33]   |
| chr9:139257297  | TUBB2C   | coding_exon | ENST00000340384:GtoD;                                                    | + | GtoA | 0.1    | 0.2    | 2  | 2  | [10,10]   |
| chr17:38019201  | TUBG1    | coding_exon | ENST00000251413:DtoG;                                                    | + | AtoG | 0.1111 | 0.125  | 2  | 2  | [16,18]   |
| chr10:134947452 | TUBGCP2  | coding_exon | ENST00000252936:VtoA;ENST00000368562:VtoA;ENST00000368563:VtoA;ENST000   | - | TtoC | 0.1026 | 0.1379 | 8  | 2  | [29,39]   |
| chr15:20421386  | TUBGCP5  | coding_exon | ENST00000283645:VtoL;ENST00000453949:VtoL;                               | + | GtoC | 0.1    | 0.25   | 3  | 2  | [10,12]   |
| chr15:20423847  | TUBGCP5  | coding_exon | ENST00000283645:StoT;ENST00000453949:StoT;                               | + | TtoA | 0.1    | 0.1    | 2  | 2  | [10,10]   |
| chr15:20400374  | TUBGCP5  | coding_exon | ENST00000283645:LtoP;ENST00000453949:LtoP;                               | + | TtoC | 0.1    | 0.1    | 2  | 2  | [10,10]   |
| chr22:49007379  | TUBGCP6  | coding_exon | ENST00000248846:VtoS;ENST00000413101:VtoS;ENST00000439308:VtoS;          | - | AtoC | 0.1    | 0.1    | 4  | 2  | [10,10]   |
| chr22:49001977  | TUBGCP6  | coding_exon | ENST00000248846:StoA;ENST00000413101:StoA;ENST00000439308:StoA;          | - | TtoG | 0.1    | 0.1    | 2  | 2  | [10,11]   |
| chr16:28761607  | TUFM     | UTR3        |                                                                          | - | CtoA | 0.4706 | 0.8    | 4  | 4  | [11,18]   |
| chr16:28761608  | TUFM     | UTR3        |                                                                          | - | GtoA | 0.5217 | 0.9412 | 9  | 9  | [10,25]   |
| chr16:28761609  | TUFM     | UTR3        |                                                                          | - | AtoG | 0.1304 | 0.2727 | 13 | 9  | [11,30]   |
| chr3:50362103   | TUSC4    | mixed       |                                                                          | - | AtoC | 0.1    | 0.1538 | 2  | 2  | [10,13]   |
| chr3:50362452   | TUSC4    | mixed       |                                                                          | - | TtoA | 0.1    | 0.1    | 2  | 2  | [10,10]   |
| chr11:62090860  | TUT1     | coding_exon | ENST00000329251:PtoR;ENST00000378019:PtoR;ENST00000424909:PtoA;          | - | CtoG | 0.1111 | 0.2    | 5  | 3  | [12,18]   |
| chr11:62090863  | TUT1     | coding_exon | ENST00000329251:LtoP;ENST00000378019:LtoP;ENST00000424909:CtoR;          | - | TtoC | 0.1579 | 0.2252 | 8  | 3  | [27,116]  |

|                 |         |             |                                                                                      |   |      |        |        |    |    |           |
|-----------------|---------|-------------|--------------------------------------------------------------------------------------|---|------|--------|--------|----|----|-----------|
| chr11:62100289  | TUT1    | coding_exon | ENST00000278279:StoF;ENST00000476907:StoF;                                           | - | CtoT | 0.1    | 0.125  | 4  | 3  | [10,24]   |
| chr11:62100960  | TUT1    | coding_exon | ENST00000278279:KtoT;ENST00000476907:KtoT;                                           | - | AtoC | 0.16   | 0.1852 | 2  | 2  | [25,27]   |
| chr11:62100288  | TUT1    | coding_exon |                                                                                      | - | CtoT | 0.1176 | 0.12   | 3  | 2  | [17,25]   |
| chr11:62083776  | TUT1    | mixed       |                                                                                      | - | CtoG | 0.1562 | 0.1667 | 5  | 2  | [13,33]   |
| chr11:62083780  | TUT1    | mixed       |                                                                                      | - | GtoT | 0.1224 | 0.2353 | 8  | 4  | [18,57]   |
| chr11:62083784  | TUT1    | mixed       |                                                                                      | - | GtoA | 0.1167 | 0.1515 | 4  | 3  | [34,61]   |
| chr11:62083794  | TUT1    | mixed       |                                                                                      | - | AtoT | 0.1154 | 0.6701 | 12 | 10 | [22,206]  |
| chr11:62083795  | TUT1    | mixed       |                                                                                      | - | TtoA | 0.12   | 0.5161 | 7  | 7  | [15,88]   |
| chr11:62083796  | TUT1    | mixed       |                                                                                      | - | GtoA | 0.14   | 0.2097 | 7  | 3  | [54,237]  |
| chr11:62083844  | TUT1    | mixed       |                                                                                      | - | GtoT | 0.1168 | 0.3849 | 15 | 14 | [46,281]  |
| chr11:62083845  | TUT1    | mixed       |                                                                                      | - | GtoC | 0.1441 | 0.487  | 15 | 14 | [47,262]  |
| chr11:62083859  | TUT1    | mixed       |                                                                                      | - | CtoT | 0.1176 | 0.16   | 5  | 2  | [17,25]   |
| chr11:62083867  | TUT1    | mixed       |                                                                                      | - | GtoC | 0.12   | 0.2432 | 12 | 8  | [23,40]   |
| chr11:62083868  | TUT1    | mixed       |                                                                                      | - | GtoT | 0.2143 | 0.6364 | 10 | 10 | [11,26]   |
| chr11:62083869  | TUT1    | mixed       |                                                                                      | - | AtoC | 0.25   | 0.5714 | 6  | 5  | [10,15]   |
| chr11:62083870  | TUT1    | mixed       |                                                                                      | - | CtoT | 0.1    | 0.1111 | 2  | 2  | [10,11]   |
| chr11:62097909  | TUT1    | mixed       |                                                                                      | - | CtoT | 0.1143 | 0.1429 | 4  | 2  | [15,36]   |
| chr11:62083653  | TUT1    | UTR3        |                                                                                      | - | TtoG | 0.2105 | 0.8    | 14 | 12 | [11,45]   |
| chr11:62083654  | TUT1    | UTR3        |                                                                                      | - | AtoG | 0.1    | 0.2455 | 11 | 5  | [11,114]  |
| chr3:52231463   | TWF2    | coding_exon | ENST00000423623:QtoE;                                                                | - | CtoG | 0.1    | 0.125  | 2  | 2  | [10,16]   |
| chr3:52231327   | TWF2    | coding_exon | ENST00000423623:LtoP;                                                                | - | TtoC | 0.1538 | 0.2222 | 5  | 2  | [10,13]   |
| chr3:52232866   | TWF2    | coding_exon | ENST00000423623:LtoP;                                                                | - | TtoC | 0.1    | 0.1    | 3  | 2  | [10,10]   |
| chr3:52237700   | TWF2    | mixed       |                                                                                      | - | TtoC | 0.1538 | 0.2941 | 2  | 2  | [13,18]   |
| chr7:19710969   | TWISTNB | coding_exon |                                                                                      | - | CtoA | 0.1    | 0.3636 | 2  | 2  | [10,11]   |
| chr7:19703700   | TWISTNB | UTR3        |                                                                                      | - | AtoG | 0.1    | 0.1364 | 4  | 2  | [10,22]   |
| chr18:9386541   | TWSG1   | coding_exon | ENST00000262120:KtoE;                                                                | + | AtoG | 0.125  | 0.1429 | 2  | 2  | [14,16]   |
| chr18:9391249   | TWSG1   | UTR3        |                                                                                      | + | TtoC | 0.1    | 0.2    | 3  | 2  | [10,15]   |
| chr9:112046131  | TXN     | UTR3        |                                                                                      | - | TtoG | 0.1    | 0.1667 | 4  | 2  | [11,12]   |
| chr9:112046230  | TXN     | UTR3        |                                                                                      | - | AtoG | 0.1205 | 0.1562 | 6  | 2  | [32,83]   |
| chr16:11732006  | TXNDC11 | coding_exon | ENST00000283033:YtoS;ENST00000356957:YtoS;ENST00000436567:YtoS;                      | - | AtoC | 0.1    | 0.1818 | 2  | 2  | [10,11]   |
| chr16:11680612  | TXNDC11 | coding_exon |                                                                                      | - | AtoC | 0.1724 | 0.2    | 3  | 2  | [11,29]   |
| chr16:11732131  | TXNDC11 | coding_exon |                                                                                      | - | TtoC | 0.1    | 0.1    | 3  | 2  | [10,10]   |
| chr1:52271754   | TXNDC12 | coding_exon |                                                                                      | - | GtoT | 0.1    | 0.1    | 2  | 2  | [10,10]   |
| chr1:52258451   | TXNDC12 | UTR3        |                                                                                      | - | AtoG | 0.1    | 0.125  | 8  | 2  | [10,17]   |
| chr6:7826803    | TXNDC5  | UTR3        |                                                                                      | - | AtoG | 0.1    | 0.1538 | 4  | 2  | [11,13]   |
| chr6:7826823    | TXNDC5  | UTR3        |                                                                                      | - | TtoA | 0.1    | 0.15   | 4  | 3  | [10,20]   |
| chr6:7826824    | TXNDC5  | UTR3        |                                                                                      | - | TtoC | 0.125  | 0.2174 | 5  | 3  | [11,23]   |
| chr18:75834500  | TXNL4A  | UTR3        |                                                                                      | - | GtoA | 0.1053 | 0.1607 | 15 | 9  | [15,56]   |
| chr16:70685368  | TXNL4B  | UTR5        |                                                                                      | - | GtoC | 0.5    | 0.7143 | 3  | 2  | [14,22]   |
| chr12:103267884 | TXNRD1  | UTR3        |                                                                                      | + | AtoG | 0.1429 | 0.1538 | 4  | 2  | [13,14]   |
| chr10:71573723  | TYSND1  | coding_exon | ENST00000287078:IttoN;                                                               | - | TtoA | 0.1    | 0.1    | 2  | 2  | [10,10]   |
| chr1:75003126   | TYW3    | UTR3        |                                                                                      | + | GtoA | 0.1    | 0.1667 | 2  | 2  | [12,20]   |
| chr21:43387726  | U2AF1   | coding_exon | ENST00000291552:GtoS;ENST00000380276:GtoS;ENST00000398137:GtoS;ENST00000412391:KtoQ; | - | GtoA | 0.125  | 0.2    | 4  | 3  | [15,16]   |
| chr21:43386191  | U2AF1   | UTR3        |                                                                                      | - | CtoA | 0.1    | 0.1111 | 7  | 3  | [10,20]   |
| chr19:40927066  | U2AF1L4 | coding_exon | ENST00000292879:KtoQ;ENST00000378975:KtoQ;ENST00000412391:KtoQ;                      | - | AtoC | 0.1    | 0.1364 | 2  | 2  | [10,22]   |
| chr1:160835975  | UAP1    | UTR3        |                                                                                      | + | AtoG | 0.1    | 0.1    | 2  | 2  | [10,10]   |
| chr4:68182570   | UBA6    | coding_exon |                                                                                      | - | AtoC | 0.1    | 0.1    | 2  | 2  | [10,10]   |
| chr4:68165569   | UBA6    | UTR3        |                                                                                      | - | TtoA | 0.125  | 0.1429 | 3  | 2  | [14,17]   |
| chr4:68166798   | UBA6    | UTR3        |                                                                                      | - | TtoG | 0.1    | 0.1176 | 7  | 2  | [10,17]   |
| chr4:68167023   | UBA6    | UTR3        |                                                                                      | - | TtoA | 0.1    | 0.2    | 3  | 3  | [10,13]   |
| chr3:49822700   | UBA7    | coding_exon | ENST00000333486:RtoG;                                                                | - | CtoG | 0.1111 | 0.1667 | 4  | 2  | [12,28]   |
| chr3:49823476   | UBA7    | coding_exon | ENST00000333486:LtoP;                                                                | - | TtoC | 0.1154 | 0.1875 | 7  | 3  | [16,26]   |
| chr3:49822701   | UBA7    | coding_exon |                                                                                      | - | CtoA | 0.1    | 0.15   | 3  | 2  | [10,20]   |
| chr9:137976767  | UBAC1   | coding_exon | ENST00000371756:EttoD;                                                               | - | GtoT | 0.1    | 0.3636 | 3  | 2  | [10,11]   |
| chr13:98744799  | UBAC2   | coding_exon |                                                                                      | + | AtoG | 0.1    | 0.1875 | 5  | 2  | [10,16]   |
| chr13:98745188  | UBAC2   | coding_exon |                                                                                      | + | AtoG | 0.1163 | 0.1875 | 3  | 2  | [16,86]   |
| chr13:98836540  | UBAC2   | UTR3        |                                                                                      | + | TtoG | 0.1053 | 0.1333 | 8  | 2  | [16,19]   |
| chr13:98836543  | UBAC2   | UTR3        |                                                                                      | + | AtoC | 0.1111 | 0.1818 | 4  | 2  | [11,18]   |
| chr9:34241521   | UBAP1   | coding_exon |                                                                                      | + | AtoT | 0.1    | 0.1818 | 2  | 2  | [10,11]   |
| chr9:33931683   | UBAP2   | coding_exon |                                                                                      | - | TtoA | 0.1    | 0.1    | 6  | 2  | [10,10]   |
| chr9:33912543   | UBAP2   | mixed       |                                                                                      | - | TtoC | 0.1    | 0.1875 | 4  | 2  | [16,30]   |
| chr9:33961733   | UBAP2   | mixed       |                                                                                      | - | TtoG | 0.1333 | 0.2727 | 2  | 2  | [11,15]   |
| chr9:33979112   | UBAP2   | mixed       |                                                                                      | - | AtoG | 0.1    | 0.1538 | 3  | 2  | [10,13]   |
| chr9:33911857   | UBAP2   | UTR3        |                                                                                      | - | GtoA | 0.1    | 0.25   | 2  | 2  | [10,16]   |
| chr1:152493139  | UBAP2L  | coding_exon | ENST00000271877:YtoD;ENST00000343815:YtoD;ENST00000361546:YtoD;ENST00000412391:KtoQ; | + | TtoG | 0.1    | 0.15   | 2  | 2  | [10,20]   |
| chr1:152509609  | UBAP2L  | mixed       |                                                                                      | + | TtoC | 0.1    | 0.1    | 3  | 2  | [10,20]   |
| chr1:152509844  | UBAP2L  | mixed       |                                                                                      | + | GtoA | 0.1    | 0.1429 | 3  | 2  | [10,15]   |
| chr12:123963624 | UBC     | coding_exon | ENST00000339647:EttoV;                                                               | - | AtoT | 0.1    | 0.3571 | 2  | 2  | [10,15]   |
| chr12:123965130 | UBC     | UTR5        |                                                                                      | - | TtoG | 0.5    | 0.5207 | 2  | 2  | [216,218] |
| chr20:43875250  | UBE2C   | mixed       |                                                                                      | + | TtoC | 0.1    | 0.1538 | 8  | 3  | [10,18]   |
| chr5:138987384  | UBE2D2  | UTR3        |                                                                                      | + | AtoG | 0.1    | 0.2    | 7  | 5  | [12,30]   |
| chr4:103936250  | UBE2D3  | mixed       |                                                                                      | - | TtoA | 0.1    | 0.1    | 6  | 2  | [10,10]   |
| chr7:43958911   | UBE2D4  | UTR3        |                                                                                      | + | AtoG | 0.1    | 0.1429 | 2  | 2  | [10,14]   |
| chr3:23907153   | UBE2E1  | UTR3        |                                                                                      | + | TtoA | 0.1429 | 0.175  | 12 | 6  | [12,41]   |
| chr3:23907154   | UBE2E1  | UTR3        |                                                                                      | + | TtoA | 0.1053 | 0.1818 | 3  | 2  | [12,19]   |
| chr3:23907462   | UBE2E1  | UTR3        |                                                                                      | + | TtoA | 0.1053 | 0.1176 | 2  | 2  | [17,19]   |
| chr3:23907801   | UBE2E1  | UTR3        |                                                                                      | + | CtoA | 0.2143 | 0.3636 | 3  | 2  | [11,14]   |
| chr2:181635945  | UBE2E3  | UTR3        |                                                                                      | + | TtoA | 0.1429 | 0.1818 | 2  | 2  | [11,14]   |
| chr21:45013514  | UBE2G2  | UTR3        |                                                                                      | - | AtoG | 0.125  | 0.1282 | 11 | 2  | [24,39]   |
| chr21:45015596  | UBE2G2  | UTR3        |                                                                                      | - | CtoT | 0.1    | 0.125  | 3  | 2  | [11,16]   |
| chr1:1181354    | UBE2J2  | coding_exon |                                                                                      | - | AtoG | 0.125  | 0.1333 | 6  | 2  | [15,16]   |
| chr4:39456637   | UBE2K   | UTR3        |                                                                                      | + | TtoA | 0.1111 | 0.1429 | 4  | 2  | [10,14]   |
| chr4:39456704   | UBE2K   | UTR3        |                                                                                      | + | AtoT | 0.1    | 0.1    | 2  | 2  | [10,10]   |
| chr4:39457196   | UBE2K   | UTR3        |                                                                                      | + | AtoG | 0.1    | 0.1818 | 4  | 3  | [10,11]   |
| chr4:39460063   | UBE2K   | UTR3        |                                                                                      | + | TtoC | 0.1    | 0.1    | 4  | 2  | [10,10]   |
| chr22:20306124  | UBE2L3  | UTR3        |                                                                                      | + | TtoA | 0.122  | 0.1429 | 8  | 2  | [28,41]   |
| chr22:20306287  | UBE2L3  | UTR3        |                                                                                      | + | GtoA | 0.2    | 0.4    | 5  | 3  | [10,12]   |
| chr22:20307187  | UBE2L3  | UTR3        |                                                                                      | + | TtoA | 0.1    | 0.1818 | 3  | 3  | [10,12]   |
| chr17:71913209  | UBE2O   | coding_exon | ENST00000319380:VtoA;                                                                | - | TtoC | 0.1429 | 0.1429 | 4  | 2  | [14,15]   |
| chr17:71906596  | UBE2O   | coding_exon | ENST00000319380:NtoT;                                                                | - | AtoC | 0.1    | 0.1818 | 2  | 2  | [10,11]   |
| chr17:71897481  | UBE2O   | UTR3        |                                                                                      | - | CtoA | 0.1    | 0.1364 | 5  | 2  | [10,22]   |
| chr17:71898341  | UBE2O   | UTR3        |                                                                                      | - | GtoA | 0.1    | 0.1818 | 3  | 2  | [10,11]   |
| chr1:152788695  | UBE2Q1  | UTR3        |                                                                                      | - | TtoC | 0.1    | 0.1    | 3  | 2  | [10,10]   |
| chr15:73970362  | UBE2Q2  | coding_exon | ENST00000267938:NtoK;ENST00000426727:NtoK;                                           | + | TtoA | 0.1    | 0.1818 | 2  | 2  | [10,22]   |
| chr15:73978852  | UBE2Q2  | coding_exon | ENST00000267938:*toE;ENST00000338677:LtoR;ENST00000426727:*toE;                      | + | TtoG | 0.1    | 0.2143 | 3  | 2  | [10,14]   |
| chr15:73979041  | UBE2Q2  | UTR3        |                                                                                      | + | TtoG | 0.1    | 0.1538 | 2  | 2  | [10,13]   |

|                 |          |             |                                                                                      |   |      |        |        |    |   |         |
|-----------------|----------|-------------|--------------------------------------------------------------------------------------|---|------|--------|--------|----|---|---------|
| chr9:33907951   | UBE2R2   | UTR3        |                                                                                      | + | TtoA | 0.1053 | 0.1053 | 3  | 2 | [19,19] |
| chr9:33907971   | UBE2R2   | UTR3        |                                                                                      | + | TtoG | 0.1    | 0.1    | 2  | 2 | [10,10] |
| chr9:33908120   | UBE2R2   | UTR3        |                                                                                      | + | CtoA | 0.1    | 0.1    | 2  | 2 | [10,10] |
| chr9:33908167   | UBE2R2   | UTR3        |                                                                                      | + | GtoT | 0.1    | 0.1    | 3  | 2 | [10,10] |
| chr9:33909509   | UBE2R2   | UTR3        |                                                                                      | + | AtoG | 0.1    | 0.125  | 2  | 2 | [17,20] |
| chr9:33909906   | UBE2R2   | UTR3        |                                                                                      | + | GtoA | 0.1    | 0.1429 | 3  | 2 | [10,14] |
| chr19:60604496  | UBE2S    | UTR3        |                                                                                      | - | TtoC | 0.1111 | 0.1765 | 4  | 2 | [17,18] |
| chr8:49136065   | UBE2V2   | UTR3        |                                                                                      | + | AtoG | 0.1333 | 0.1818 | 3  | 2 | [11,15] |
| chr8:49136622   | UBE2V2   | UTR3        |                                                                                      | + | TtoA | 0.1176 | 0.125  | 7  | 2 | [16,17] |
| chr17:44361069  | UBE2Z    | UTR3        |                                                                                      | + | AtoT | 0.1525 | 0.1951 | 2  | 2 | [41,59] |
| chr17:44361072  | UBE2Z    | UTR3        |                                                                                      | + | GtoA | 0.102  | 0.1463 | 4  | 3 | [41,49] |
| chr15:23135408  | UBE3A    | coding_exon | ENST00000232165:ItaN;ENST00000397954:ItaN;ENST00000438097:ItaN;                      | - | TtoA | 0.1    | 0.1111 | 6  | 2 | [10,18] |
| chr12:108456956 | UBE3B    | coding_exon | ENST00000342494:FtoV;ENST00000434735:FtoV;                                           | + | TtoG | 0.1    | 0.2    | 4  | 3 | [10,10] |
| chr12:108425340 | UBE3B    | mixed       |                                                                                      | + | TtoA | 0.1    | 0.1111 | 2  | 2 | [10,10] |
| chr11:117755577 | UBE4A    | coding_exon | ENST00000252108:VtoG;ENST00000431736:VtoG;                                           | + | TtoG | 0.1    | 0.1    | 2  | 2 | [10,10] |
| chr11:117741019 | UBE4A    | coding_exon | ENST00000252108:EtaG;ENST00000431736:EtaG;                                           | + | AtoG | 0.1    | 0.1333 | 2  | 2 | [10,15] |
| chr11:117749520 | UBE4A    | coding_exon |                                                                                      | + | TtoC | 0.1    | 0.1    | 2  | 2 | [10,10] |
| chr1:10109491   | UBE4B    | coding_exon | ENST00000253251:LtoP;ENST00000343090:LtoP;ENST00000377157:LtoP;                      | + | TtoC | 0.1    | 0.1818 | 5  | 2 | [10,11] |
| chr1:10162617   | UBE4B    | UTR3        |                                                                                      | + | AtoC | 0.1    | 0.1    | 2  | 2 | [10,10] |
| chr16:23485812  | UBFD1    | coding_exon | ENST00000219638:RtoQ;ENST00000395878:RtoQ;                                           | + | GtoA | 0.1    | 0.1176 | 2  | 2 | [10,17] |
| chr16:23491807  | UBFD1    | UTR3        |                                                                                      | + | TtoC | 0.1111 | 0.1304 | 3  | 2 | [18,23] |
| chr16:23493091  | UBFD1    | UTR3        |                                                                                      | + | AtoG | 0.1    | 0.1    | 2  | 2 | [10,30] |
| chr1:11268804   | UBIAD1   | mixed       |                                                                                      | + | TtoC | 0.1    | 0.1111 | 2  | 2 | [10,18] |
| chr1:11270684   | UBIAD1   | mixed       |                                                                                      | + | AtoT | 0.1    | 0.1    | 3  | 2 | [10,10] |
| chr19:9801782   | UBL5     | UTR3        |                                                                                      | + | TtoA | 0.1    | 0.1429 | 5  | 2 | [10,14] |
| chr19:9801792   | UBL5     | UTR3        |                                                                                      | + | CtoA | 0.1    | 0.3333 | 5  | 4 | [10,14] |
| chr16:4850859   | UBN1     | coding_exon | ENST00000262376:LtoV;ENST00000396658:LtoV;                                           | + | TtoG | 0.1    | 0.1    | 3  | 2 | [10,10] |
| chr16:4860319   | UBN1     | coding_exon |                                                                                      | + | TtoC | 0.1    | 0.1111 | 4  | 2 | [10,10] |
| chr16:4872304   | UBN1     | UTR3        |                                                                                      | + | TtoC | 0.1667 | 0.3    | 2  | 2 | [11,12] |
| chr20:3075395   | UBOX5    | UTR5        |                                                                                      | - | AtoT | 0.1    | 0.125  | 4  | 2 | [10,16] |
| chr20:3075399   | UBOX5    | UTR5        |                                                                                      | - | TtoA | 0.1    | 0.1    | 2  | 2 | [10,10] |
| chr20:3075673   | UBOX5    | UTR5        |                                                                                      | - | GtoT | 0.1111 | 0.1818 | 2  | 2 | [11,18] |
| chr20:33419376  | UBP1     | coding_exon | ENST00000283628:TtoP;ENST00000283629:TtoP;ENST00000447368:TtoP;                      | - | AtoC | 0.1538 | 0.1765 | 4  | 2 | [13,17] |
| chr9:85464773   | UBQLN1   | UTR3        |                                                                                      | - | TtoA | 0.1053 | 0.125  | 5  | 2 | [16,19] |
| chr9:85465140   | UBQLN1   | UTR3        |                                                                                      | - | AtoG | 0.1    | 0.1    | 5  | 2 | [10,10] |
| chr9:85465645   | UBQLN1   | UTR3        |                                                                                      | - | AtoG | 0.1    | 0.2857 | 5  | 5 | [10,14] |
| chr9:85465823   | UBQLN1   | UTR3        |                                                                                      | - | TtoA | 0.1176 | 0.2222 | 5  | 2 | [10,17] |
| chr9:85466238   | UBQLN1   | UTR3        |                                                                                      | - | AtoG | 0.1    | 0.1304 | 3  | 2 | [10,23] |
| chr9:85466244   | UBQLN1   | UTR3        |                                                                                      | - | TtoC | 0.1429 | 0.2    | 7  | 2 | [10,14] |
| chr15:41031783  | UBR1     | mixed       |                                                                                      | - | TtoG | 0.1    | 0.1    | 2  | 2 | [10,10] |
| chr6:42734521   | UBR2     | coding_exon | ENST00000372899:StoP;ENST00000372901:StoP;                                           | + | TtoC | 0.1    | 0.1538 | 2  | 2 | [10,13] |
| chr1:19313988   | UBR4     | mixed       |                                                                                      | - | CtoA | 0.1    | 0.1    | 2  | 2 | [10,10] |
| chr1:19338300   | UBR4     | mixed       |                                                                                      | - | TtoC | 0.1    | 0.1176 | 4  | 2 | [10,17] |
| chr1:19349698   | UBR4     | mixed       |                                                                                      | - | TtoG | 0.1176 | 0.1667 | 2  | 2 | [12,17] |
| chr1:19354011   | UBR4     | mixed       |                                                                                      | - | TtoG | 0.1    | 0.1    | 2  | 2 | [10,10] |
| chr1:19367221   | UBR4     | mixed       |                                                                                      | - | TtoC | 0.1    | 0.1333 | 2  | 2 | [10,15] |
| chr8:103380890  | UBR5     | coding_exon |                                                                                      | - | TtoC | 0.1    | 0.1765 | 2  | 2 | [18,30] |
| chr8:103334916  | UBR5     | UTR3        |                                                                                      | - | TtoC | 0.1429 | 0.2    | 8  | 2 | [14,15] |
| chr8:103335331  | UBR5     | UTR3        |                                                                                      | - | TtoA | 0.1    | 0.1818 | 2  | 2 | [10,11] |
| chr8:103335333  | UBR5     | UTR3        |                                                                                      | - | AtoG | 0.1111 | 0.1818 | 5  | 2 | [11,18] |
| chr8:103335340  | UBR5     | UTR3        |                                                                                      | - | AtoG | 0.1282 | 0.1875 | 11 | 2 | [16,42] |
| chr5:171571571  | UBTD2    | coding_exon |                                                                                      | - | TtoC | 0.1    | 0.1538 | 2  | 2 | [10,13] |
| chr5:171570809  | UBTD2    | UTR3        |                                                                                      | - | TtoA | 0.1    | 0.1    | 5  | 2 | [10,10] |
| chr17:39638194  | UBTF     | UTR3        |                                                                                      | - | TtoC | 0.125  | 0.1364 | 8  | 2 | [17,22] |
| chr17:39638439  | UBTF     | UTR3        |                                                                                      | - | GtoT | 0.1    | 0.1    | 2  | 2 | [10,10] |
| chr11:62200556  | UBXN1    | UTR3        |                                                                                      | - | AtoG | 0.1429 | 0.3636 | 6  | 4 | [11,27] |
| chr11:62200558  | UBXN1    | UTR3        |                                                                                      | - | TtoG | 0.1    | 0.1111 | 10 | 4 | [10,11] |
| chr2:136256946  | UBXN4    | UTR3        |                                                                                      | + | TtoC | 0.1    | 0.1333 | 4  | 2 | [10,15] |
| chr19:4396026   | UBXN6    | UTR3        |                                                                                      | - | AtoG | 0.1    | 0.1333 | 5  | 3 | [10,15] |
| chr3:197579392  | UBXN7    | coding_exon |                                                                                      | - | TtoC | 0.1    | 0.1    | 2  | 2 | [10,10] |
| chr3:197560125  | UBXN7    | UTR3        |                                                                                      | - | TtoG | 0.1    | 0.1176 | 2  | 2 | [10,17] |
| chr3:197563393  | UBXN7    | UTR3        |                                                                                      | - | AtoG | 0.1    | 0.1    | 2  | 2 | [10,10] |
| chr3:197565587  | UBXN7    | UTR3        |                                                                                      | - | TtoC | 0.1    | 0.1667 | 5  | 2 | [10,18] |
| chr3:197566737  | UBXN7    | UTR3        |                                                                                      | - | GtoA | 0.1    | 0.1    | 3  | 2 | [10,10] |
| chr3:197567808  | UBXN7    | UTR3        |                                                                                      | - | TtoC | 0.1    | 0.2    | 3  | 2 | [10,10] |
| chr9:133389038  | UCK1     | UTR3        |                                                                                      | - | AtoG | 0.1    | 0.25   | 4  | 2 | [10,12] |
| chr9:133389205  | UCK1     | UTR3        |                                                                                      | - | CtoA | 0.1    | 0.1    | 2  | 2 | [10,10] |
| chr1:164147043  | UCK2     | mixed       |                                                                                      | + | TtoA | 0.1    | 0.1053 | 2  | 2 | [10,20] |
| chr1:159390403  | UFC1     | UTR5        |                                                                                      | + | TtoC | 0.1    | 0.1    | 4  | 2 | [10,10] |
| chr1:159390405  | UFC1     | UTR5        |                                                                                      | + | GtoC | 0.1053 | 0.125  | 4  | 2 | [16,19] |
| chr4:186573326  | UFSP2    | coding_exon | ENST00000264689:GtoC;                                                                | - | GtoT | 0.1    | 0.2    | 4  | 2 | [10,20] |
| chr4:186576644  | UFSP2    | coding_exon | ENST00000264689:EtaG;                                                                | - | AtoG | 0.1053 | 0.1333 | 3  | 2 | [15,19] |
| chr9:113734421  | UGCG     | coding_exon |                                                                                      | + | AtoG | 0.1    | 0.2143 | 5  | 3 | [10,29] |
| chr9:113735965  | UGCG     | UTR3        |                                                                                      | + | GtoC | 0.1667 | 0.3664 | 2  | 2 | [12,33] |
| chr2:128644385  | UGCGL1   | coding_exon | ENST00000259253:VtoG;ENST00000375990:VtoG;                                           | + | TtoG | 0.1    | 0.1538 | 3  | 2 | [10,13] |
| chr2:128665458  | UGCGL1   | UTR3        |                                                                                      | + | AtoC | 0.1    | 0.1    | 3  | 2 | [10,10] |
| chr2:128665459  | UGCGL1   | UTR3        |                                                                                      | + | CtoA | 0.1    | 0.1    | 3  | 2 | [10,10] |
| chr2:128665548  | UGCGL1   | UTR3        |                                                                                      | + | AtoC | 0.1667 | 0.2308 | 2  | 2 | [12,13] |
| chr2:128667961  | UGCGL1   | UTR3        |                                                                                      | + | AtoG | 0.1818 | 0.2    | 4  | 2 | [10,11] |
| chr2:128667962  | UGCGL1   | UTR3        |                                                                                      | + | AtoG | 0.1    | 0.3    | 4  | 2 | [10,10] |
| chr2:128667981  | UGCGL1   | UTR3        |                                                                                      | + | AtoG | 0.1    | 0.2857 | 4  | 4 | [10,15] |
| chr2:128668146  | UGCGL1   | UTR3        |                                                                                      | + | CtoT | 0.1    | 0.1    | 3  | 2 | [10,10] |
| chr4:39182503   | UGDH     | coding_exon | ENST00000316423:StoP;                                                                | - | TtoC | 0.1053 | 0.1333 | 2  | 2 | [15,19] |
| chr4:39183718   | UGDH     | coding_exon | ENST00000316423:ItaV;                                                                | - | AtoG | 0.1    | 0.1053 | 4  | 2 | [10,19] |
| chr4:39177391   | UGDH     | UTR3        |                                                                                      | - | TtoA | 0.1429 | 0.2    | 2  | 2 | [10,21] |
| chr1:160759243  | UHMK1    | UTR3        |                                                                                      | + | TtoG | 0.1176 | 0.1538 | 4  | 2 | [13,17] |
| chr1:160760238  | UHMK1    | UTR3        |                                                                                      | + | TtoC | 0.1    | 0.1    | 2  | 2 | [10,10] |
| chr1:160760506  | UHMK1    | UTR3        |                                                                                      | + | TtoA | 0.1    | 0.125  | 2  | 2 | [10,16] |
| chr6:34958759   | UHRF1BP1 | mixed       |                                                                                      | + | TtoG | 0.1    | 0.125  | 3  | 2 | [10,16] |
| chr6:34958835   | UHRF1BP1 | mixed       |                                                                                      | + | GtoC | 0.1026 | 0.1379 | 3  | 2 | [29,39] |
| chr9:6467643    | UHRF2    | coding_exon | ENST00000276893:DtoA;                                                                | + | AtoC | 0.1    | 0.1111 | 3  | 2 | [10,10] |
| chr9:6467752    | UHRF2    | coding_exon |                                                                                      | + | TtoA | 0.1    | 0.1176 | 12 | 2 | [10,17] |
| chr9:6496343    | UHRF2    | UTR3        |                                                                                      | + | AtoG | 0.1176 | 0.1875 | 6  | 2 | [17,18] |
| chr5:176317737  | UIMC1    | coding_exon | ENST00000274827:TtoP;ENST00000323774:TtoP;ENST00000377219:TtoP;ENST00000377219:TtoP; | - | AtoC | 0.1    | 0.1538 | 4  | 3 | [10,14] |
| chr5:176264756  | UIMC1    | UTR3        |                                                                                      | - | AtoG | 0.1429 | 0.2    | 3  | 2 | [10,14] |
| chr12:130972938 | ULK1     | UTR3        |                                                                                      | + | CtoT | 0.1    | 0.1    | 2  | 2 | [10,10] |

|                 |         |             |                                                                                      |   |      |        |        |    |    |          |
|-----------------|---------|-------------|--------------------------------------------------------------------------------------|---|------|--------|--------|----|----|----------|
| chr17:23897898  | UNC119  | UTR3        |                                                                                      | - | TtoC | 0.125  | 0.14   | 13 | 2  | [16,51]  |
| chr12:119642517 | UNC119B | UTR3        |                                                                                      | + | GtoA | 0.1    | 0.1    | 2  | 2  | [10,10]  |
| chr12:119643422 | UNC119B | UTR3        |                                                                                      | + | AtoG | 0.1    | 0.1333 | 2  | 2  | [10,15]  |
| chr12:119644454 | UNC119B | UTR3        |                                                                                      | + | TtoA | 0.1    | 0.1    | 4  | 2  | [10,10]  |
| chr12:119645409 | UNC119B | UTR3        |                                                                                      | + | TtoA | 0.1    | 0.1    | 4  | 2  | [10,10]  |
| chr15:89292383  | UNC45A  | coding_exon | ENST00000268159:CtoG;ENST00000394275:CtoG;ENST00000418476:CtoG;                      | + | TtoG | 0.1071 | 0.1379 | 8  | 5  | [17,34]  |
| chr7:866403     | UNC84A  | coding_exon | ENST00000297445:DtoA;ENST00000389574:DtoA;ENST00000401592:DtoA;ENST00000401592:DtoA; | + | AtoC | 0.1    | 0.1    | 3  | 2  | [10,10]  |
| chr7:849655     | UNC84A  | coding_exon |                                                                                      | + | AtoG | 0.1    | 0.1    | 2  | 2  | [10,10]  |
| chr22:37467521  | UNC84B  | mixed       |                                                                                      | - | AtoT | 0.1667 | 0.1667 | 3  | 2  | [12,12]  |
| chr19:18838385  | UPF1    | UTR3        |                                                                                      | + | TtoA | 0.1538 | 0.1818 | 9  | 2  | [11,14]  |
| chr10:12111023  | UPF2    | coding_exon | ENST00000313977:LtoQ;ENST00000356352:LtoQ;ENST00000357604:LtoQ;ENST00000357604:LtoQ; | - | TtoA | 0.1    | 0.1    | 2  | 2  | [10,10]  |
| chr10:12024748  | UPF2    | coding_exon |                                                                                      | - | TtoC | 0.1053 | 0.1875 | 7  | 2  | [17,19]  |
| chr10:12002929  | UPF2    | UTR3        |                                                                                      | - | AtoG | 0.1    | 0.1053 | 2  | 2  | [10,20]  |
| chr13:114075083 | UPF3A   | coding_exon | ENST00000351487:LtoI;ENST00000375299:LtoI;                                           | + | CtoA | 0.1765 | 0.2    | 4  | 2  | [10,17]  |
| chr11:118334142 | UPK2    | coding_exon | ENST00000264031:StoP;                                                                | + | TtoC | 0.1    | 0.1818 | 3  | 2  | [10,11]  |
| chr19:1549046   | UQCR    | UTR3        |                                                                                      | - | TtoA | 0.1111 | 0.5    | 14 | 12 | [10,25]  |
| chr19:1549049   | UQCR    | UTR3        |                                                                                      | - | TtoC | 0.1    | 0.125  | 6  | 3  | [32,55]  |
| chr1:46555033   | UQCRH   | UTR3        |                                                                                      | + | AtoG | 0.1034 | 0.1579 | 14 | 7  | [19,78]  |
| chr5:132231273  | UQCRR   | UTR3        |                                                                                      | + | TtoC | 0.1    | 0.1683 | 21 | 9  | [44,181] |
| chr5:132231279  | UQCRR   | UTR3        |                                                                                      | + | CtoA | 0.5833 | 0.9565 | 10 | 10 | [10,24]  |
| chr21:32638838  | URB1    | coding_exon | ENST00000382751:LtoP;                                                                | - | TtoC | 0.1    | 0.1111 | 5  | 2  | [10,20]  |
| chr1:227861653  | URB2    | coding_exon | ENST00000258243:RtoG;                                                                | + | AtoG | 0.1    | 0.1818 | 2  | 2  | [10,11]  |
| chr9:130189970  | URM1    | mixed       |                                                                                      | + | CtoA | 0.1    | 0.1    | 2  | 2  | [10,10]  |
| chr1:159275769  | USF1    | UTR3        |                                                                                      | - | AtoG | 0.1091 | 0.3077 | 7  | 2  | [13,61]  |
| chr19:40462472  | USF2    | UTR3        |                                                                                      | + | TtoG | 0.125  | 0.175  | 3  | 3  | [23,80]  |
| chr4:76952367   | USO1    | mixed       |                                                                                      | + | AtoC | 0.1    | 0.1429 | 4  | 2  | [14,20]  |
| chr1:62679833   | USP1    | coding_exon | ENST00000339950:LtoP;ENST00000371146:LtoP;ENST00000433771:LtoP;                      | + | TtoC | 0.1316 | 0.1579 | 5  | 3  | [13,38]  |
| chr1:62689705   | USP1    | UTR3        |                                                                                      | + | GtoA | 0.1    | 0.1    | 2  | 2  | [10,20]  |
| chr18:201850    | USP14   | UTR3        |                                                                                      | + | TtoA | 0.1176 | 0.2308 | 6  | 2  | [13,17]  |
| chr18:203566    | USP14   | UTR3        |                                                                                      | + | AtoT | 0.1    | 0.1    | 2  | 2  | [10,10]  |
| chr12:61001528  | USP15   | coding_exon |                                                                                      | + | AtoG | 0.1    | 0.1538 | 3  | 2  | [10,13]  |
| chr21:29348066  | USP16   | coding_exon | ENST00000334352:StoP;ENST00000399975:StoP;ENST00000399976:StoP;                      | + | TtoC | 0.125  | 0.1538 | 5  | 2  | [13,16]  |
| chr21:29341218  | USP16   | coding_exon |                                                                                      | + | TtoA | 0.1    | 0.1    | 2  | 2  | [10,10]  |
| chr21:29343014  | USP16   | coding_exon |                                                                                      | + | TtoA | 0.1    | 0.1429 | 4  | 2  | [10,14]  |
| chr9:131683148  | USP20   | UTR3        |                                                                                      | + | GtoT | 0.1    | 0.1    | 3  | 2  | [10,10]  |
| chr1:159401311  | USP21   | coding_exon | ENST00000289865:PtoT;ENST00000368001:PtoT;ENST00000368002:PtoT;ENST00000368002:PtoT; | + | CtoA | 0.1    | 0.1    | 2  | 2  | [10,10]  |
| chr1:159400606  | USP21   | coding_exon | ENST00000289865:LtoP;ENST00000368001:LtoP;ENST00000368002:LtoP;ENST00000368002:LtoP; | + | TtoC | 0.1111 | 0.125  | 6  | 2  | [16,18]  |
| chr17:20845949  | USP22   | UTR3        |                                                                                      | - | TtoG | 0.1765 | 0.2    | 2  | 2  | [20,34]  |
| chr17:20845950  | USP22   | UTR3        |                                                                                      | - | AtoT | 0.2105 | 0.2222 | 3  | 2  | [19,36]  |
| chr17:20846416  | USP22   | UTR3        |                                                                                      | - | TtoG | 0.1176 | 0.2353 | 2  | 2  | [17,17]  |
| chr1:55304792   | USP24   | UTR3        |                                                                                      | - | CtoA | 0.1    | 0.1818 | 2  | 2  | [10,11]  |
| chr21:16172871  | USP25   | UTR3        |                                                                                      | + | AtoG | 0.1    | 0.1333 | 4  | 2  | [10,16]  |
| chr11:113179779 | USP28   | coding_exon | ENST00000003302:Kto*;ENST00000260188:Kto*;                                           | - | AtoT | 0.1    | 0.1    | 5  | 2  | [10,10]  |
| chr11:113179802 | USP28   | coding_exon | ENST00000003302:HtoR;ENST00000260188:HtoR;                                           | - | AtoG | 0.1    | 0.1053 | 2  | 2  | [10,19]  |
| chr11:113185176 | USP28   | coding_exon |                                                                                      | - | AtoG | 0.1176 | 0.1538 | 2  | 2  | [13,17]  |
| chr15:61667673  | USP3    | coding_exon | ENST00000268049:KtoQ;ENST00000380324:KtoQ;                                           | + | AtoC | 0.1333 | 0.1667 | 4  | 2  | [12,15]  |
| chr15:61667625  | USP3    | coding_exon | ENST00000268049:KtoE;ENST00000380324:KtoE;                                           | + | AtoG | 0.125  | 0.2    | 3  | 2  | [10,16]  |
| chr15:61633032  | USP3    | mixed       |                                                                                      | + | AtoG | 0.1    | 0.1429 | 2  | 2  | [14,20]  |
| chr17:55668306  | USP32   | coding_exon | ENST00000300896:QtoR;                                                                | - | AtoG | 0.1333 | 0.2    | 6  | 2  | [10,15]  |
| chr1:77934329   | USP33   | UTR3        |                                                                                      | - | GtoA | 0.1    | 0.1667 | 3  | 2  | [10,12]  |
| chr1:77934594   | USP33   | UTR3        |                                                                                      | - | TtoA | 0.1    | 0.1111 | 2  | 2  | [10,18]  |
| chr2:61329192   | USP34   | coding_exon | ENST00000263989:YtoN;ENST00000398569:YtoN;ENST00000398571:YtoN;ENST00000398571:YtoN; | - | TtoA | 0.1053 | 0.2    | 2  | 2  | [10,19]  |
| chr2:61460860   | USP34   | coding_exon | ENST00000263989:YtoC;ENST00000398569:YtoC;ENST00000398571:YtoC;ENST00000398571:YtoC; | - | AtoG | 0.1    | 0.1    | 2  | 2  | [10,10]  |
| chr2:61307751   | USP34   | coding_exon | ENST00000263989:MtoK;ENST00000398569:MtoK;ENST00000398571:MtoK;ENST00000398571:MtoK; | - | TtoA | 0.1    | 0.1    | 3  | 2  | [10,10]  |
| chr2:61271269   | USP34   | coding_exon | ENST00000263989:LtoH;ENST00000398569:LtoH;ENST00000398571:LtoH;ENST00000398571:LtoH; | - | TtoA | 0.1    | 0.1111 | 2  | 2  | [10,18]  |
| chr2:61284927   | USP34   | coding_exon | ENST00000263989:CtoR;ENST00000398569:CtoR;ENST00000398571:CtoR;ENST00000398571:CtoR; | - | TtoC | 0.125  | 0.1333 | 4  | 2  | [15,16]  |
| chr2:61269637   | USP34   | coding_exon |                                                                                      | - | TtoC | 0.1    | 0.1    | 4  | 2  | [10,20]  |
| chr11:77598785  | USP35   | coding_exon | ENST00000263311:IttoV;ENST00000441408:IttoV;                                         | + | AtoG | 0.1    | 0.2    | 2  | 2  | [10,10]  |
| chr17:74310156  | USP36   | coding_exon | ENST00000312010:KtoR;ENST00000449938:KtoR;                                           | - | AtoG | 0.1    | 0.2857 | 5  | 5  | [10,17]  |
| chr17:74321540  | USP36   | coding_exon | ENST00000312010:GtoV;ENST00000449938:GtoV;                                           | - | GtoT | 0.1    | 0.1    | 2  | 2  | [10,10]  |
| chr4:144360913  | USP38   | coding_exon | ENST00000307017:AtoS;                                                                | + | GtoT | 0.1    | 0.125  | 4  | 2  | [10,16]  |
| chr4:144360912  | USP38   | coding_exon |                                                                                      | + | TtoC | 0.1    | 0.1538 | 3  | 2  | [10,13]  |
| chr4:144361071  | USP38   | UTR3        |                                                                                      | + | TtoC | 0.1    | 0.1    | 3  | 2  | [10,10]  |
| chr2:85689195   | USP39   | mixed       |                                                                                      | + | CtoT | 0.1    | 0.125  | 4  | 2  | [16,20]  |
| chr3:49310394   | USP4    | coding_exon | ENST00000265560:VtoA;ENST00000351842:VtoA;                                           | - | TtoC | 0.1    | 0.2    | 7  | 3  | [17,25]  |
| chr3:49347937   | USP4    | coding_exon |                                                                                      | - | TtoC | 0.125  | 0.1333 | 3  | 2  | [15,24]  |
| chr3:49290593   | USP4    | UTR3        |                                                                                      | - | CtoA | 0.2727 | 0.3077 | 3  | 2  | [11,13]  |
| chr3:49290596   | USP4    | UTR3        |                                                                                      | - | AtoG | 0.1    | 0.1429 | 3  | 2  | [10,14]  |
| chr11:11921087  | USP47   | coding_exon |                                                                                      | + | GtoA | 0.1111 | 0.1765 | 5  | 3  | [17,18]  |
| chr1:21878313   | USP48   | UTR3        |                                                                                      | - | GtoC | 0.1053 | 0.125  | 2  | 2  | [16,19]  |
| chr1:21878317   | USP48   | UTR3        |                                                                                      | - | TtoA | 0.1111 | 0.1176 | 3  | 2  | [17,18]  |
| chr10:11563873  | USP6NL  | coding_exon | ENST00000277575:LtoP;ENST00000379237:LtoP;                                           | - | TtoC | 0.1    | 0.1429 | 2  | 2  | [10,14]  |
| chr10:11544797  | USP6NL  | coding_exon |                                                                                      | - | CtoA | 0.1    | 0.1333 | 3  | 2  | [10,15]  |
| chr10:11543644  | USP6NL  | UTR3        |                                                                                      | - | CtoA | 0.1    | 0.1    | 2  | 2  | [10,10]  |
| chr16:8893522   | USP7    | UTR3        |                                                                                      | - | TtoC | 0.1    | 0.1    | 2  | 2  | [10,10]  |
| chr15:48538595  | USP8    | coding_exon | ENST00000307179:TtoA;ENST00000396444:TtoA;ENST00000425032:TtoA;ENST00000425032:TtoA; | + | AtoG | 0.1    | 0.1053 | 3  | 2  | [10,19]  |
| chr15:48575461  | USP8    | coding_exon | ENST00000307179:GtoV;ENST00000396444:GtoV;ENST00000425032:GtoV;ENST00000425032:GtoV; | + | GtoT | 0.2    | 0.2    | 2  | 2  | [10,10]  |
| chr15:48578726  | USP8    | UTR3        |                                                                                      | + | TtoC | 0.1111 | 0.1538 | 2  | 2  | [13,18]  |
| chr15:48579099  | USP8    | UTR3        |                                                                                      | + | AtoC | 0.1    | 0.125  | 2  | 2  | [10,16]  |
| chr5:72900123   | UTP15   | coding_exon |                                                                                      | + | TtoC | 0.1    | 0.1111 | 2  | 2  | [10,18]  |
| chr12:100235527 | UTP20   | coding_exon | ENST00000261637:QtoR;                                                                | + | AtoG | 0.1538 | 0.2    | 2  | 2  | [10,14]  |
| chr12:100303985 | UTP20   | coding_exon | ENST00000261637:KtoE;                                                                | + | AtoG | 0.1    | 0.1    | 2  | 2  | [10,10]  |
| chr8:117853115  | UTP23   | coding_exon |                                                                                      | + | TtoC | 0.1538 | 0.1538 | 2  | 2  | [13,13]  |
| chr4:7174729    | UTP3    | mixed       |                                                                                      | + | TtoA | 0.1    | 0.2222 | 2  | 2  | [10,10]  |
| chr6:144853857  | UTRN    | coding_exon | ENST00000367545:KtoE;                                                                | + | AtoG | 0.1    | 0.1    | 2  | 2  | [10,10]  |
| chr6:145213839  | UTRN    | UTR3        |                                                                                      | + | GtoA | 0.1    | 0.125  | 2  | 2  | [10,16]  |
| chr11:75531073  | UVRAG   | UTR3        |                                                                                      | + | TtoC | 0.4038 | 0.5435 | 3  | 3  | [41,53]  |
| chr11:75531161  | UVRAG   | UTR3        |                                                                                      | + | AtoG | 0.1    | 0.125  | 4  | 2  | [10,16]  |
| chr11:75531210  | UVRAG   | UTR3        |                                                                                      | + | AtoG | 0.1154 | 0.1765 | 2  | 2  | [18,26]  |
| chr2:106076917  | UXS1    | coding_exon | ENST00000283148:StoR;ENST00000409032:StoR;ENST00000409501:StoR;                      | - | CtoA | 0.1    | 0.1176 | 4  | 2  | [10,17]  |
| chr2:106076273  | UXS1    | UTR3        |                                                                                      | - | GtoA | 0.1    | 0.1176 | 4  | 2  | [10,17]  |
| chr16:69288661  | VAC14   | coding_exon | ENST00000261776:EtoK;                                                                | - | GtoA | 0.1    | 0.1    | 3  | 2  | [10,10]  |
| chr12:6443526   | VAMP1   | mixed       |                                                                                      | - | TtoG | 0.1333 | 0.1765 | 6  | 2  | [15,17]  |
| chr12:6441902   | VAMP1   | UTR3        |                                                                                      | - | TtoC | 0.1    | 0.1333 | 5  | 3  | [10,19]  |
| chr17:8003892   | VAMP2   | UTR3        |                                                                                      | - | TtoA | 0.1    | 0.1053 | 3  | 2  | [10,19]  |
| chr17:7763942   | VAMP3   | UTR3        |                                                                                      | + | TtoC | 0.1    | 0.1    | 3  | 2  | [10,10]  |

|                 |          |             |                                                                                         |   |      |        |        |    |    |          |
|-----------------|----------|-------------|-----------------------------------------------------------------------------------------|---|------|--------|--------|----|----|----------|
| chr2:85662660   | VAMP8    | UTR3        |                                                                                         | + | TtoC | 0.1    | 0.3    | 6  | 3  | [10,16]  |
| chr18:9944453   | VAPA     | UTR3        |                                                                                         | + | TtoC | 0.1    | 0.1333 | 7  | 3  | [10,16]  |
| chr18:9946548   | VAPA     | UTR3        |                                                                                         | + | AtoG | 0.1    | 0.1    | 3  | 2  | [10,10]  |
| chr20:56453317  | VAP8     | UTR3        |                                                                                         | + | AtoG | 0.1    | 0.1667 | 2  | 2  | [10,12]  |
| chr6:31855000   | VARS     | mixed       |                                                                                         | - | TtoG | 0.1154 | 0.1333 | 2  | 2  | [30,52]  |
| chr6:31853295   | VARS     | UTR3        |                                                                                         | - | AtoG | 0.1429 | 0.2    | 6  | 2  | [15,28]  |
| chr1:211201216  | VASH2    | mixed       |                                                                                         | + | TtoA | 0.1    | 0.125  | 3  | 2  | [10,16]  |
| chr1:211229083  | VASH2    | UTR3        |                                                                                         | + | AtoT | 0.1    | 0.1    | 2  | 2  | [10,10]  |
| chr1:211230888  | VASH2    | UTR3        |                                                                                         | + | CtoA | 0.1429 | 0.1818 | 2  | 2  | [11,14]  |
| chr17:38421074  | VAT1     | UTR3        |                                                                                         | - | TtoC | 0.1    | 0.1    | 2  | 2  | [10,10]  |
| chr17:38421078  | VAT1     | UTR3        |                                                                                         | - | AtoG | 0.1    | 0.1    | 2  | 2  | [10,10]  |
| chr19:6808303   | VAV1     | UTR3        |                                                                                         | + | AtoG | 0.1    | 0.1176 | 5  | 2  | [17,20]  |
| chr10:75548065  | VCL      | UTR3        |                                                                                         | + | GtoA | 0.1538 | 0.2    | 3  | 2  | [10,13]  |
| chr10:75548070  | VCL      | UTR3        |                                                                                         | + | CtoG | 0.1    | 0.1818 | 2  | 2  | [10,11]  |
| chr10:75548345  | VCL      | UTR3        |                                                                                         | + | AtoG | 0.1    | 0.1111 | 3  | 3  | [10,18]  |
| chr9:35046558   | VCP      | UTR3        |                                                                                         | - | CtoA | 0.1111 | 0.375  | 8  | 4  | [11,18]  |
| chr9:35046559   | VCP      | UTR3        |                                                                                         | - | GtoA | 0.1613 | 0.4762 | 13 | 10 | [15,31]  |
| chr5:133335505  | VDAC1    | UTR3        |                                                                                         | - | AtoG | 0.2222 | 0.4545 | 2  | 2  | [10,11]  |
| chr5:133335507  | VDAC1    | UTR3        |                                                                                         | - | TtoC | 0.1481 | 0.2    | 2  | 2  | [15,28]  |
| chr10:76661042  | VDAC2    | UTR3        |                                                                                         | + | CtoA | 0.1071 | 0.25   | 13 | 8  | [12,29]  |
| chr12:46523451  | VDR      | UTR3        |                                                                                         | - | TtoC | 0.1    | 0.1    | 2  | 2  | [10,10]  |
| chr6:43861518   | VEGFA    | UTR3        |                                                                                         | + | TtoC | 0.1429 | 0.1429 | 2  | 2  | [14,14]  |
| chr17:53414251  | VEZF1    | coding_exon |                                                                                         | - | AtoG | 0.1    | 0.1    | 2  | 2  | [10,10]  |
| chr12:94200455  | VEZT     | coding_exon | ENST00000261219:QtoR;ENST00000397792:QtoR;ENST00000397796:QtoR;ENST00000397797:QtoR     | + | AtoG | 0.1333 | 0.1667 | 4  | 2  | [12,15]  |
| chr3:11574200   | VGLL4    | UTR3        |                                                                                         | - | AtoG | 0.1    | 0.1    | 2  | 2  | [10,10]  |
| chr3:11574486   | VGLL4    | UTR3        |                                                                                         | - | AtoG | 0.1053 | 0.1333 | 4  | 2  | [15,19]  |
| chr3:10167484   | VHL      | UTR3        |                                                                                         | + | AtoG | 0.1538 | 0.1818 | 2  | 2  | [11,13]  |
| chr6:159106766  | VIL2     | UTR3        |                                                                                         | - | GtoA | 0.1667 | 0.4375 | 5  | 5  | [12,19]  |
| chr6:159106767  | VIL2     | UTR3        |                                                                                         | - | CtoA | 0.1818 | 0.6    | 11 | 9  | [10,19]  |
| chr6:159106768  | VIL2     | UTR3        |                                                                                         | - | AtoG | 0.1333 | 0.25   | 14 | 9  | [12,24]  |
| chr6:159106938  | VIL2     | UTR3        |                                                                                         | - | TtoA | 0.102  | 0.1207 | 6  | 2  | [49,58]  |
| chr6:159106946  | VIL2     | UTR3        |                                                                                         | - | TtoG | 0.102  | 0.1613 | 4  | 3  | [31,49]  |
| chr6:159107351  | VIL2     | UTR3        |                                                                                         | - | AtoG | 0.1034 | 0.1579 | 8  | 2  | [19,29]  |
| chr6:159107353  | VIL2     | UTR3        |                                                                                         | - | AtoG | 0.1132 | 0.1607 | 17 | 8  | [48,161] |
| chr6:159107865  | VIL2     | UTR3        |                                                                                         | - | CtoT | 0.125  | 0.44   | 7  | 6  | [21,40]  |
| chr6:159107869  | VIL2     | UTR3        |                                                                                         | - | GtoT | 0.3256 | 0.4286 | 3  | 3  | [16,43]  |
| chr7:65058004   | VKORC1L1 | UTR3        |                                                                                         | + | TtoA | 0.1    | 0.1    | 2  | 2  | [10,10]  |
| chr6:133115319  | VNN2     | coding_exon | ENST00000326499:TtoR;ENST00000335846:TtoR;ENST00000392389:TtoR;                         | - | CtoG | 0.1    | 0.1    | 2  | 2  | [10,10]  |
| chr6:133112676  | VNN2     | mixed       |                                                                                         | - | AtoG | 0.1    | 0.1333 | 2  | 2  | [10,15]  |
| chr22:22425173  | VPREB3   | coding_exon | ENST00000248948:StoP;ENST00000398465:StoP;                                              | - | TtoC | 0.125  | 0.2    | 3  | 2  | [15,16]  |
| chr11:118449156 | VPS11    | mixed       |                                                                                         | + | AtoT | 0.1    | 0.1    | 4  | 2  | [10,10]  |
| chr9:79175641   | VPS13A   | coding_exon | ENST00000355766:IttoV;ENST00000357409:IttoV;ENST00000360280:IttoV;ENST00000360281:IttoV | + | AtoG | 0.1333 | 0.1429 | 3  | 2  | [14,15]  |
| chr9:79148957   | VPS13A   | coding_exon |                                                                                         | + | TtoC | 0.1333 | 0.1667 | 2  | 2  | [12,15]  |
| chr9:79221924   | VPS13A   | UTR3        |                                                                                         | + | TtoA | 0.1111 | 0.1538 | 2  | 2  | [13,18]  |
| chr15:59935848  | VPS13C   | coding_exon | ENST00000249837:WtoR;ENST00000261517:WtoR;                                              | - | TtoC | 0.1111 | 0.1333 | 6  | 2  | [16,19]  |
| chr15:59963741  | VPS13C   | coding_exon | ENST00000249837:VtoM;ENST00000261517:VtoM;ENST00000395898:VtoM;                         | - | GtoA | 0.1    | 0.1818 | 3  | 2  | [10,11]  |
| chr1:12382911   | VPS13D   | coding_exon |                                                                                         | + | CtoG | 0.1    | 0.1    | 2  | 2  | [10,10]  |
| chr20:2790498   | VPS16A   | coding_exon | ENST00000380445:VtoA;                                                                   | + | TtoC | 0.1    | 0.1154 | 4  | 2  | [10,26]  |
| chr15:38982702  | VPS18    | coding_exon | ENST00000220509:QtoH;                                                                   | + | GtoT | 0.1    | 0.1538 | 2  | 2  | [10,13]  |
| chr15:38974338  | VPS18    | coding_exon | ENST00000220509:IttoT;                                                                  | + | TtoC | 0.1    | 0.1    | 2  | 2  | [10,10]  |
| chr15:38983228  | VPS18    | UTR3        |                                                                                         | + | TtoC | 0.1    | 0.1053 | 4  | 2  | [10,19]  |
| chr2:86585374   | VPS24    | UTR3        |                                                                                         | - | CtoG | 0.1    | 0.1    | 3  | 2  | [10,10]  |
| chr10:70592265  | VPS26A   | coding_exon | ENST00000263559:TtoS;ENST00000373382:TtoS;ENST00000395098:TtoS;                         | + | AtoT | 0.1    | 0.1538 | 2  | 2  | [10,13]  |
| chr10:70601993  | VPS26A   | UTR3        |                                                                                         | + | TtoA | 0.1    | 0.1    | 6  | 2  | [10,10]  |
| chr10:70602196  | VPS26A   | UTR3        |                                                                                         | + | TtoA | 0.1053 | 0.1538 | 3  | 2  | [13,19]  |
| chr10:70602468  | VPS26A   | UTR3        |                                                                                         | + | TtoA | 0.1    | 0.2308 | 12 | 3  | [10,13]  |
| chr11:133620758 | VPS26B   | UTR3        |                                                                                         | + | TtoG | 0.1    | 0.1    | 3  | 2  | [10,10]  |
| chr8:145619817  | VPS28    | UTR3        |                                                                                         | - | TtoC | 0.1    | 0.2    | 7  | 5  | [15,81]  |
| chr15:89358076  | VPS33B   | coding_exon | ENST00000333371:Rto*;                                                                   | - | CtoT | 0.1    | 0.1    | 2  | 2  | [10,10]  |
| chr15:89350915  | VPS33B   | coding_exon | ENST00000333371:LtoR;                                                                   | - | TtoG | 0.1    | 0.1    | 5  | 2  | [10,10]  |
| chr15:89352198  | VPS33B   | coding_exon | ENST00000333371:DtoG;                                                                   | - | AtoG | 0.1    | 0.1053 | 2  | 2  | [10,19]  |
| chr16:45249577  | VPS35    | UTR3        |                                                                                         | - | TtoC | 0.1    | 0.1429 | 2  | 2  | [10,14]  |
| chr13:51886706  | VPS36    | UTR3        |                                                                                         | - | AtoC | 0.1    | 0.1    | 2  | 2  | [10,10]  |
| chr11:60654544  | VPS37C   | UTR3        |                                                                                         | - | GtoT | 0.1    | 0.1    | 2  | 2  | [10,10]  |
| chr15:40264099  | VPS39    | coding_exon | ENST00000318006:VtoG;ENST00000348544:VtoG;                                              | - | TtoG | 0.1667 | 0.2    | 5  | 3  | [11,20]  |
| chr15:40257947  | VPS39    | coding_exon | ENST00000318006:StoP;ENST00000348544:StoP;                                              | - | TtoC | 0.1    | 0.1    | 2  | 2  | [10,30]  |
| chr15:40257770  | VPS39    | coding_exon | ENST00000318006:MtoL;ENST00000348544:MtoL;                                              | - | AtoT | 0.1    | 0.1667 | 2  | 2  | [10,12]  |
| chr15:40245254  | VPS39    | coding_exon | ENST00000318006:LtoP;ENST00000348544:LtoP;                                              | - | TtoC | 0.1053 | 0.1333 | 2  | 2  | [15,19]  |
| chr15:40238205  | VPS39    | UTR3        |                                                                                         | - | AtoG | 0.1    | 0.2    | 2  | 2  | [10,10]  |
| chr15:40240051  | VPS39    | UTR3        |                                                                                         | - | AtoG | 0.1    | 0.2    | 3  | 2  | [10,10]  |
| chr15:40240191  | VPS39    | UTR3        |                                                                                         | - | TtoG | 0.1071 | 0.1111 | 4  | 2  | [18,28]  |
| chr7:38732163   | VPS41    | UTR3        |                                                                                         | - | GtoA | 0.1    | 0.1    | 4  | 2  | [10,20]  |
| chr1:148349275  | VPS45    | coding_exon | ENST00000369130:YtoN;                                                                   | + | TtoA | 0.1    | 0.1    | 3  | 2  | [10,10]  |
| chr1:148307414  | VPS45    | coding_exon | ENST00000369130:LtoR;                                                                   | + | TtoG | 0.1    | 0.1    | 3  | 2  | [10,10]  |
| chr17:451863    | VPS53    | mixed       |                                                                                         | - | AtoG | 0.1176 | 0.1333 | 2  | 2  | [15,17]  |
| chr17:368529    | VPS53    | UTR3        |                                                                                         | - | AtoG | 0.1    | 0.2    | 7  | 3  | [10,10]  |
| chr2:58240005   | VRK2     | coding_exon | ENST00000340157:RtoS;ENST00000412104:RtoS;ENST00000423109:RtoS;ENST00000423110:RtoS;    | + | AtoT | 0.1053 | 0.125  | 4  | 2  | [19,24]  |
| chr2:58169009   | VRK2     | coding_exon | ENST00000340157:GtoV;ENST00000394539:GtoV;ENST00000412104:GtoV;ENST00000423110:GtoV;    | + | GtoT | 0.1    | 0.1    | 2  | 2  | [10,10]  |
| chr2:58240371   | VRK2     | UTR3        |                                                                                         | + | TtoC | 0.1333 | 0.1538 | 5  | 2  | [14,16]  |
| chr19:55215713  | VRK3     | UTR5        |                                                                                         | - | GtoT | 0.1    | 0.1    | 3  | 2  | [10,11]  |
| chr6:142529113  | VTA1     | coding_exon |                                                                                         | + | TtoC | 0.1176 | 0.1429 | 5  | 2  | [17,21]  |
| chr6:142581753  | VTA1     | UTR3        |                                                                                         | + | AtoG | 0.1    | 0.1    | 3  | 2  | [10,20]  |
| chr6:142582297  | VTA1     | UTR3        |                                                                                         | + | TtoC | 0.1    | 0.1538 | 5  | 3  | [10,13]  |
| chr10:114566744 | VTI1A    | UTR3        |                                                                                         | + | GtoA | 0.4167 | 0.4706 | 3  | 2  | [12,17]  |
| chr11:60783195  | VWCE     | coding_exon | ENST00000301770:LtoP;ENST00000335613:LtoP;                                              | - | TtoC | 0.1176 | 0.1818 | 2  | 2  | [11,17]  |
| chr10:28919740  | WAC      | coding_exon | ENST00000347934:TtoP;ENST00000354911:TtoP;ENST00000375646:TtoP;ENST00000375647:TtoP;    | + | AtoC | 0.1    | 0.1622 | 5  | 4  | [20,41]  |
| chr10:28948876  | WAC      | UTR3        |                                                                                         | + | TtoC | 0.1    | 0.25   | 4  | 3  | [10,18]  |
| chr10:88249736  | WAPAL    | mixed       |                                                                                         | - | CtoA | 0.1    | 0.1    | 2  | 2  | [10,10]  |
| chr10:88250260  | WAPAL    | mixed       |                                                                                         | - | TtoA | 0.1    | 0.1667 | 4  | 2  | [10,18]  |
| chr10:88186996  | WAPAL    | UTR3        |                                                                                         | - | TtoC | 0.1    | 0.125  | 6  | 3  | [10,18]  |
| chr14:99869879  | WARS     | UTR3        |                                                                                         | - | CtoA | 0.1818 | 0.5    | 8  | 8  | [10,16]  |
| chr14:99870601  | WARS     | UTR3        |                                                                                         | - | AtoG | 0.1042 | 0.122  | 9  | 2  | [41,97]  |
| chr1:119420524  | WARS2    | coding_exon | ENST00000235521:EttoG;ENST00000369426:EttoG;                                            | - | AtoG | 0.1    | 0.2727 | 3  | 2  | [10,12]  |
| chr1:119377362  | WARS2    | mixed       |                                                                                         | - | TtoC | 0.1053 | 0.1304 | 3  | 2  | [19,23]  |
| chr1:119376964  | WARS2    | UTR3        |                                                                                         | - | TtoC | 0.1    | 0.1667 | 2  | 2  | [10,12]  |
| chr2:74541517   | WBP1     | UTR3        |                                                                                         | + | GtoA | 0.1    | 0.125  | 4  | 2  | [10,16]  |

|                 |         |             |                                                                            |   |      |        |        |   |   |         |
|-----------------|---------|-------------|----------------------------------------------------------------------------|---|------|--------|--------|---|---|---------|
| chr12:14835457  | WBP11   | coding_exon | ENST00000261167:FtoV;                                                      | - | TtoG | 0.1    | 0.125  | 9 | 2 | [10,17] |
| chr13:40555106  | WBP4    | UTR3        |                                                                            | + | AtoG | 0.1    | 0.2143 | 4 | 2 | [10,14] |
| chr7:72739087   | WBSCR22 | coding_exon | ENST00000265758:CtoW;ENST00000420399:CtoW;ENST00000423166:CtoW;ENST        | + | TtoG | 0.119  | 0.129  | 9 | 3 | [32,43] |
| chr2:224455014  | WDFY1   | coding_exon | ENST00000233055:GtoE;ENST00000352510:GtoE;                                 | - | GtoA | 0.125  | 0.1875 | 3 | 2 | [16,16] |
| chr2:224451226  | WDFY1   | UTR3        |                                                                            | - | TtoG | 0.1111 | 0.2143 | 3 | 3 | [14,18] |
| chr13:51223550  | WDFY2   | coding_exon | ENST00000298125:EtoK;                                                      | + | GtoA | 0.1429 | 0.3    | 4 | 2 | [10,14] |
| chr10:49601539  | WDFY4   | mixed       |                                                                            | + | TtoG | 0.1    | 0.1    | 4 | 2 | [10,10] |
| chr10:49563048  | WDFY4   | UTR5        |                                                                            | + | TtoC | 0.1    | 0.1111 | 2 | 2 | [10,18] |
| chr14:54499297  | WDHD1   | coding_exon | ENST00000359167:Wto*;ENST00000360586:Wto*;ENST00000421192:Wto*;            | - | GtoA | 0.1053 | 0.125  | 2 | 2 | [16,19] |
| chr14:54477941  | WDHD1   | UTR3        |                                                                            | - | TtoC | 0.1    | 0.2    | 4 | 2 | [10,11] |
| chr19:945557    | WDR18   | UTR3        |                                                                            | + | CtoA | 0.16   | 0.1818 | 3 | 2 | [11,25] |
| chr14:101745162 | WDR20   | coding_exon | ENST00000299135:HtoR;ENST00000335263:HtoR;ENST00000342702:HtoR;ENST00      | + | AtoG | 0.1    | 0.1    | 2 | 2 | [10,10] |
| chr14:101745788 | WDR20   | coding_exon | ENST00000299135:Gto*;ENST00000335263:Gto*;ENST00000342702:Gto*;ENST00      | + | GtoT | 0.1    | 0.1429 | 2 | 2 | [10,14] |
| chr14:23662253  | WDR23   | mixed       |                                                                            | + | CtoA | 0.1    | 0.2333 | 6 | 4 | [35,70] |
| chr1:222688102  | WDR26   | mixed       |                                                                            | - | TtoG | 0.1429 | 0.1429 | 2 | 2 | [14,14] |
| chr1:222643885  | WDR26   | UTR3        |                                                                            | - | TtoG | 0.1111 | 0.125  | 3 | 2 | [10,16] |
| chr1:222643886  | WDR26   | UTR3        |                                                                            | - | TtoC | 0.1    | 0.125  | 3 | 2 | [10,16] |
| chr1:118278808  | WDR3    | coding_exon | ENST00000349139:RtoG;                                                      | + | AtoG | 0.1    | 0.1538 | 3 | 2 | [10,13] |
| chr1:118286656  | WDR3    | coding_exon |                                                                            | + | CtoA | 0.1429 | 0.2    | 6 | 2 | [10,14] |
| chr9:37851913   | WDR32   | UTR3        |                                                                            | + | GtoC | 0.1    | 0.1    | 2 | 2 | [10,10] |
| chr2:128198479  | WDR33   | coding_exon | ENST00000322313:KtoR;                                                      | - | AtoG | 0.1    | 0.1818 | 2 | 2 | [10,11] |
| chr2:128196772  | WDR33   | coding_exon | ENST00000322313:KtoE;                                                      | - | AtoG | 0.1    | 0.1    | 2 | 2 | [10,10] |
| chr2:128239019  | WDR33   | coding_exon | ENST00000322313:HtoL;ENST00000393006:HtoL;ENST00000409658:HtoL;            | - | AtoT | 0.125  | 0.25   | 4 | 2 | [12,16] |
| chr2:128177554  | WDR33   | UTR3        |                                                                            | - | AtoG | 0.1    | 0.1    | 3 | 2 | [10,10] |
| chr2:128180152  | WDR33   | UTR3        |                                                                            | - | CtoA | 0.1    | 0.2    | 3 | 2 | [15,20] |
| chr2:20001014   | WDR35   | coding_exon |                                                                            | - | TtoG | 0.1    | 0.1    | 3 | 2 | [10,10] |
| chr10:1160194   | WDR37   | coding_exon | ENST00000263150:NtoK;ENST00000358220:NtoK;ENST00000416775:NtoK;            | + | CtoA | 0.1    | 0.1    | 2 | 2 | [10,10] |
| chr10:1166263   | WDR37   | UTR3        |                                                                            | + | CtoA | 0.1    | 0.1    | 2 | 2 | [10,10] |
| chr5:76772461   | WDR41   | mixed       |                                                                            | - | AtoG | 0.1111 | 0.1538 | 9 | 2 | [10,13] |
| chr5:76764463   | WDR41   | UTR3        |                                                                            | - | TtoA | 0.1    | 0.1    | 3 | 2 | [10,10] |
| chr1:158456474  | WDR42A  | coding_exon |                                                                            | - | AtoG | 0.1    | 0.1    | 2 | 2 | [10,10] |
| chr2:29011949   | WDR43   | coding_exon | ENST00000407426:LtoP;                                                      | + | TtoC | 0.1    | 0.1429 | 2 | 2 | [10,14] |
| chr2:28982886   | WDR43   | coding_exon | ENST00000407426:CtoW;                                                      | + | TtoG | 0.1429 | 0.1818 | 3 | 2 | [11,14] |
| chr2:29023563   | WDR43   | UTR3        |                                                                            | + | GtoA | 0.1    | 0.1667 | 2 | 2 | [10,12] |
| chr3:39113029   | WDR48   | mixed       |                                                                            | + | AtoG | 0.1053 | 0.1176 | 2 | 2 | [17,19] |
| chr3:39111685   | WDR48   | UTR3        |                                                                            | + | TtoG | 0.1    | 0.1    | 2 | 2 | [10,10] |
| chr3:52155016   | WDR51A  | coding_exon | ENST00000296484:FtoV;ENST00000394970:FtoV;ENST00000474012:FtoV;            | - | TtoG | 0.1    | 0.125  | 3 | 2 | [10,16] |
| chr3:52134187   | WDR51A  | coding_exon |                                                                            | - | TtoC | 0.1    | 0.1    | 2 | 2 | [10,10] |
| chr12:88373938  | WDR51B  | UTR3        |                                                                            | - | GtoA | 0.1    | 0.1538 | 2 | 2 | [10,13] |
| chr16:73509347  | WDR59   | coding_exon | ENST00000262144:VtoG;                                                      | - | TtoG | 0.1    | 0.1429 | 7 | 2 | [31,35] |
| chr16:73515337  | WDR59   | coding_exon | ENST00000262144:KtoN;                                                      | - | GtoT | 0.1    | 0.1    | 4 | 2 | [10,10] |
| chr16:73495377  | WDR59   | coding_exon | ENST00000205064:VtoG;ENST00000262144:VtoG;                                 | - | TtoG | 0.125  | 0.1818 | 3 | 2 | [11,16] |
| chr16:73479578  | WDR59   | coding_exon | ENST00000205064:HtoR;ENST00000262144:HtoR;                                 | - | AtoG | 0.1176 | 0.1333 | 6 | 2 | [15,17] |
| chr3:49024505   | WDR6    | coding_exon |                                                                            | + | TtoG | 0.1071 | 0.2105 | 4 | 2 | [19,28] |
| chr7:158376784  | WDR60   | coding_exon | ENST00000407559:VtoG;                                                      | + | TtoG | 0.1    | 0.1    | 2 | 2 | [10,10] |
| chr5:37515706   | WDR70   | coding_exon | ENST00000265107:StoP;                                                      | + | TtoC | 0.1    | 0.1667 | 3 | 2 | [10,12] |
| chr5:37432309   | WDR70   | coding_exon |                                                                            | + | TtoA | 0.1    | 0.1667 | 5 | 2 | [10,13] |
| chr5:37788474   | WDR70   | UTR3        |                                                                            | + | TtoC | 0.1    | 0.1429 | 7 | 4 | [10,14] |
| chr2:190048187  | WDR75   | coding_exon |                                                                            | + | TtoA | 0.1053 | 0.125  | 5 | 3 | [16,20] |
| chr15:41919191  | WDR76   | coding_exon |                                                                            | + | AtoC | 0.1    | 0.1304 | 3 | 2 | [10,23] |
| chr15:41921919  | WDR76   | coding_exon |                                                                            | + | TtoC | 0.1    | 0.1111 | 4 | 2 | [10,18] |
| chr17:1580933   | WDR81   | mixed       |                                                                            | + | CtoA | 0.1    | 0.1538 | 2 | 2 | [10,13] |
| chr9:139578784  | WDR85   | coding_exon | ENST00000277540:HtoR;                                                      | - | AtoG | 0.1    | 0.125  | 4 | 2 | [17,21] |
| chr7:150705895  | WDR86   | mixed       |                                                                            | - | AtoG | 0.1    | 0.1111 | 6 | 3 | [10,19] |
| chr14:63135679  | WDR89   | mixed       |                                                                            | - | TtoA | 0.1    | 0.2    | 2 | 2 | [10,10] |
| chr16:656120    | WDR90   | coding_exon | ENST00000293879:TtoS;ENST00000315764:TtoS;                                 | + | CtoG | 0.1    | 0.1176 | 3 | 2 | [10,17] |
| chr16:655684    | WDR90   | coding_exon | ENST00000293879:NtoS;ENST00000315764:NtoS;                                 | + | AtoG | 0.1    | 0.1818 | 3 | 3 | [10,21] |
| chr7:134524638  | WDR91   | coding_exon | ENST00000326099:FtoS;ENST00000344400:FtoS;ENST00000354475:FtoS;ENST0000    | - | TtoC | 0.1154 | 0.1395 | 9 | 2 | [43,78] |
| chr7:134524637  | WDR91   | coding_exon | ENST00000326099:FtoL;ENST00000344400:FtoL;ENST00000354475:FtoL;ENST0000    | - | TtoA | 0.1071 | 0.1628 | 8 | 4 | [18,83] |
| chr7:134519530  | WDR91   | UTR3        |                                                                            | - | TtoG | 0.1053 | 0.1667 | 4 | 2 | [12,19] |
| chr7:134519901  | WDR91   | UTR3        |                                                                            | - | TtoC | 0.1    | 0.125  | 2 | 2 | [10,16] |
| chr2:68218038   | WDR92   | coding_exon | ENST00000295121:IttoK;ENST00000295122:IttoK;ENST00000406245:IttoK;ENST0000 | - | TtoA | 0.1    | 0.1667 | 4 | 3 | [10,14] |
| chr2:159813262  | WDSUB1  | coding_exon |                                                                            | - | AtoT | 0.1    | 0.1    | 2 | 2 | [10,10] |
| chr1:27507299   | WDTCT1  | UTR3        |                                                                            | + | TtoA | 0.1    | 0.1    | 3 | 2 | [10,11] |
| chr8:124517875  | WDYHV1  | coding_exon | ENST00000287387:DtoA;                                                      | + | AtoC | 0.1    | 0.1    | 2 | 2 | [10,20] |
| chr15:81296511  | WHAMM   | coding_exon | ENST00000234505:VtoG;ENST00000286760:VtoG;                                 | + | TtoG | 0.1    | 0.1    | 2 | 2 | [10,10] |
| chr4:1952282    | WHSC1   | UTR3        |                                                                            | + | TtoC | 0.1    | 0.125  | 3 | 2 | [10,16] |
| chr4:1953485    | WHSC1   | UTR3        |                                                                            | + | TtoA | 0.1    | 0.125  | 4 | 2 | [10,16] |
| chr4:1954266    | WHSC2   | UTR3        |                                                                            | - | TtoC | 0.125  | 0.2    | 4 | 3 | [10,19] |
| chr12:54581816  | WIBG    | UTR3        |                                                                            | - | TtoG | 0.1143 | 0.7    | 2 | 2 | [11,35] |
| chr17:35688016  | WIPF2   | UTR3        |                                                                            | + | TtoC | 0.1    | 0.1818 | 3 | 2 | [10,11] |
| chr17:35688392  | WIPF2   | UTR3        |                                                                            | + | GtoA | 0.1    | 0.1    | 3 | 2 | [10,10] |
| chr17:35689265  | WIPF2   | UTR3        |                                                                            | + | AtoG | 0.1    | 0.1176 | 6 | 2 | [10,18] |
| chr17:35689823  | WIPF2   | UTR3        |                                                                            | + | TtoG | 0.1    | 0.1111 | 3 | 2 | [10,18] |
| chr17:35691004  | WIPF2   | UTR3        |                                                                            | + | TtoC | 0.1    | 0.1818 | 2 | 2 | [10,11] |
| chr7:5237210    | WIPI2   | UTR3        |                                                                            | + | AtoG | 0.1053 | 0.1579 | 6 | 3 | [13,19] |
| chr7:5237212    | WIPI2   | UTR3        |                                                                            | + | AtoG | 0.1333 | 0.1429 | 3 | 2 | [15,15] |
| chr7:5237330    | WIPI2   | UTR3        |                                                                            | + | TtoC | 0.1111 | 0.1111 | 3 | 2 | [10,18] |
| chr12:860397    | WNK1    | coding_exon | ENST00000315939:TtoA;ENST00000340908:TtoA;                                 | + | AtoG | 0.1    | 0.1    | 2 | 2 | [10,10] |
| chr12:793097    | WNK1    | coding_exon | ENST00000252477:QtoR;ENST00000315939:QtoR;ENST00000447667:QtoR;            | + | AtoG | 0.1053 | 0.125  | 5 | 2 | [16,19] |
| chr12:733498    | WNK1    | coding_exon | ENST00000252477:PtoR;ENST00000315939:PtoR;ENST00000447667:PtoR;            | + | CtoG | 0.1111 | 0.2    | 2 | 2 | [10,19] |
| chr12:850692    | WNK1    | coding_exon | ENST00000252477:AttoP;ENST00000315939:AttoP;ENST00000340908:AttoP;         | + | GtoC | 0.1538 | 0.1905 | 5 | 2 | [13,21] |
| chr12:861482    | WNK1    | coding_exon |                                                                            | + | AtoG | 0.1304 | 0.1818 | 8 | 3 | [11,23] |
| chr12:888267    | WNK1    | UTR3        |                                                                            | + | TtoC | 0.1    | 0.1818 | 4 | 2 | [12,20] |
| chr12:888667    | WNK1    | UTR3        |                                                                            | + | AtoC | 0.1111 | 0.1333 | 2 | 2 | [15,27] |
| chr12:889253    | WNK1    | UTR3        |                                                                            | + | TtoC | 0.5333 | 0.6667 | 3 | 3 | [18,43] |
| chr17:7546837   | WRAP53  | coding_exon | ENST00000316024:StoP;ENST00000396463:StoP;ENST00000431639:StoP;ENST0000    | + | TtoC | 0.1176 | 0.1667 | 3 | 2 | [12,17] |
| chr21:39685572  | WRB     | coding_exon |                                                                            | + | TtoC | 0.1    | 0.1053 | 6 | 2 | [10,38] |
| chr8:31144228   | WRN     | coding_exon |                                                                            | + | TtoC | 0.1    | 0.2    | 2 | 2 | [10,25] |
| chr6:2730716    | WRNIP1  | UTR3        |                                                                            | + | TtoC | 0.1    | 0.2    | 4 | 2 | [20,40] |
| chr17:22664527  | WSB1    | UTR3        |                                                                            | + | TtoC | 0.1111 | 0.1667 | 3 | 2 | [18,27] |
| chr12:116955128 | WSB2    | UTR3        |                                                                            | - | CtoG | 0.1    | 0.1429 | 2 | 2 | [10,14] |
| chr12:116955130 | WSB2    | UTR3        |                                                                            | - | TtoG | 0.1333 | 0.1875 | 2 | 2 | [15,16] |
| chr12:116956005 | WSB2    | UTR3        |                                                                            | - | TtoC | 0.1071 | 0.1333 | 2 | 2 | [15,30] |
| chr6:160097091  | WTAP    | UTR3        |                                                                            | + | TtoA | 0.1    | 0.1818 | 4 | 2 | [10,11] |
| chr16:68479460  | WWP2    | coding_exon | ENST00000356003:TtoP;ENST00000359154:TtoP;ENST00000448661:TtoP;            | + | AtoC | 0.1    | 0.2143 | 3 | 3 | [10,16] |



|                 |          |             |                                                                                          |   |      |        |        |    |    |          |
|-----------------|----------|-------------|------------------------------------------------------------------------------------------|---|------|--------|--------|----|----|----------|
| chr16:68500214  | WWP2     | coding_exon | ENST00000356003:NtoD;ENST00000359154:NtoD;ENST00000448661:NtoD;                          | + | AtoG | 0.1    | 0.1429 | 2  | 2  | [10,14]  |
| chr17:6604641   | XAF1     | coding_exon | ENST00000346752:KtoE;ENST00000348844:KtoE;ENST00000361842:KtoE;ENST00000361842:KtoE;     | + | AtoG | 0.1    | 0.1429 | 5  | 2  | [10,14]  |
| chr17:6617325   | XAF1     | UTR3        |                                                                                          | + | TtoG | 0.1    | 0.1667 | 5  | 2  | [10,12]  |
| chr22:27520547  | XBP1     | UTR3        |                                                                                          | - | GtoA | 0.1304 | 0.1333 | 2  | 2  | [15,23]  |
| chr3:14172876   | XPC      | mixed       |                                                                                          | - | GtoC | 0.2    | 0.3077 | 3  | 3  | [10,14]  |
| chr3:14175116   | XPC      | mixed       |                                                                                          | - | TtoG | 0.125  | 0.1333 | 5  | 2  | [15,16]  |
| chr10:111630641 | XPMPF1   | coding_exon |                                                                                          | - | CtoT | 0.4375 | 0.7083 | 2  | 2  | [24,32]  |
| chr2:61573087   | XPO1     | coding_exon | ENST00000195419:KtoE;ENST00000401558:KtoE;ENST00000403576:KtoE;ENST00000403576:KtoE;     | - | AtoG | 0.1053 | 0.1333 | 7  | 2  | [15,19]  |
| chr2:61582645   | XPO1     | coding_exon | ENST00000195419:IttoT;ENST00000401558:IttoT;ENST00000403576:IttoT;ENST00000403576:IttoT; | - | TtoC | 0.1    | 0.1111 | 4  | 2  | [10,18]  |
| chr2:61618424   | XPO1     | UTR5        |                                                                                          | - | GtoT | 0.1    | 0.1875 | 6  | 3  | [10,18]  |
| chr13:20271447  | XPO4     | coding_exon | ENST00000255305:WtoR;ENST00000400602:WtoR;                                               | - | TtoC | 0.1429 | 0.1667 | 2  | 2  | [12,14]  |
| chr8:21919093   | XPO7     | UTR3        |                                                                                          | + | AtoG | 0.1111 | 0.1579 | 10 | 4  | [19,23]  |
| chr12:63128326  | XPOT     | UTR3        |                                                                                          | + | TtoC | 0.1    | 0.1667 | 5  | 4  | [12,20]  |
| chr12:63128436  | XPOT     | UTR3        |                                                                                          | + | TtoC | 0.1    | 0.1429 | 2  | 2  | [10,14]  |
| chr12:63128641  | XPOT     | UTR3        |                                                                                          | + | AtoG | 0.1    | 0.1667 | 3  | 2  | [12,20]  |
| chr1:179606619  | XPR1     | coding_exon | ENST00000367589:GtoC;ENST00000367590:GtoC;                                               | + | GtoT | 0.1    | 0.1    | 2  | 2  | [10,10]  |
| chr1:179120874  | XPR1     | UTR3        |                                                                                          | + | TtoG | 0.1    | 0.1    | 2  | 2  | [10,10]  |
| chr1:179121495  | XPR1     | UTR3        |                                                                                          | + | GtoT | 0.1    | 0.1    | 2  | 2  | [10,10]  |
| chr14:103243262 | XRCC3    | coding_exon | ENST00000352127:HtoQ;ENST00000440302:HtoQ;ENST00000445556:HtoQ;                          | - | CtoA | 0.1    | 0.1176 | 2  | 2  | [10,17]  |
| chr2:216778386  | XRCC5    | UTR3        |                                                                                          | + | AtoG | 0.1176 | 0.2    | 12 | 4  | [14,17]  |
| chr2:216779239  | XRCC5    | UTR3        |                                                                                          | + | TtoA | 0.1667 | 0.2308 | 8  | 3  | [13,18]  |
| chr2:216682334  | XRCC5    | UTR5        |                                                                                          | + | AtoT | 0.1    | 0.1667 | 3  | 2  | [10,12]  |
| chr2:40389974   | XRCC6    | UTR3        |                                                                                          | + | CtoA | 0.1034 | 0.2903 | 10 | 7  | [27,46]  |
| chr2:40389975   | XRCC6    | UTR3        |                                                                                          | + | CtoT | 0.1071 | 0.2    | 8  | 6  | [17,36]  |
| chr3:143513340  | XRN1     | coding_exon |                                                                                          | - | TtoA | 0.1    | 0.1    | 3  | 2  | [10,10]  |
| chr11:74230144  | XRRA1    | UTR3        |                                                                                          | - | TtoA | 0.1    | 0.1    | 3  | 2  | [10,10]  |
| chr17:45793483  | XYLT2    | UTR3        |                                                                                          | + | AtoG | 0.1    | 0.1667 | 2  | 2  | [10,12]  |
| chr1:42935014   | YBX1     | coding_exon | ENST00000318612:NtoD;ENST00000321358:NtoD;                                               | + | AtoG | 0.101  | 0.1011 | 11 | 2  | [89,107] |
| chr1:42935447   | YBX1     | coding_exon | ENST00000318612:NtoD;ENST00000321358:NtoD;                                               | + | AtoG | 0.1    | 0.2308 | 4  | 2  | [10,13]  |
| chr1:42935438   | YBX1     | coding_exon | ENST00000318612:GtoS;ENST00000321358:GtoS;                                               | + | GtoA | 0.1111 | 0.1282 | 13 | 4  | [27,67]  |
| chr1:42935491   | YBX1     | coding_exon | ENST00000318612:CtoY;ENST00000321358:MtoI;                                               | + | GtoA | 0.1    | 0.2727 | 8  | 5  | [10,12]  |
| chr1:42935442   | YBX1     | coding_exon | ENST00000318612:AtoD;ENST00000321358:AtoD;                                               | + | CtoA | 0.1    | 0.3077 | 9  | 5  | [10,26]  |
| chr1:42935443   | YBX1     | coding_exon |                                                                                          | + | TtoA | 0.1176 | 0.1667 | 11 | 3  | [13,17]  |
| chr22:20312408  | YDJC     | UTR3        |                                                                                          | - | TtoA | 0.1    | 0.3158 | 4  | 2  | [10,20]  |
| chr3:184952733  | YEATS2   | coding_exon | ENST00000305135:KtoT;ENST00000421660:KtoT;                                               | + | AtoC | 0.1111 | 0.2    | 7  | 3  | [10,18]  |
| chr3:184952732  | YEATS2   | coding_exon | ENST00000305135:KtoE;ENST00000421660:KtoE;                                               | + | AtoG | 0.1    | 0.1333 | 3  | 2  | [10,15]  |
| chr3:184986627  | YEATS2   | coding_exon |                                                                                          | + | AtoG | 0.1    | 0.1429 | 4  | 2  | [10,14]  |
| chr18:746699    | YES1     | coding_exon |                                                                                          | - | GtoA | 0.1818 | 1      | 7  | 6  | [11,31]  |
| chr19:43487887  | YIF1B    | mixed       |                                                                                          | - | TtoG | 0.12   | 0.125  | 4  | 2  | [24,26]  |
| chr19:43487598  | YIF1B    | UTR3        |                                                                                          | - | AtoG | 0.1    | 0.1429 | 5  | 3  | [10,16]  |
| chr2:32386216   | YIPF4    | UTR3        |                                                                                          | + | GtoT | 0.1    | 0.1    | 2  | 2  | [10,10]  |
| chr5:143525295  | YIPF5    | coding_exon | ENST00000274496:QtoH;ENST00000377986:QtoH;ENST00000448443:QtoH;                          | - | AtoC | 0.1053 | 0.1176 | 2  | 2  | [17,19]  |
| chr5:143519163  | YIPF5    | mixed       |                                                                                          | - | TtoC | 0.1    | 0.1667 | 2  | 2  | [10,12]  |
| chr5:143519949  | YIPF5    | mixed       |                                                                                          | - | TtoA | 0.125  | 0.1818 | 2  | 2  | [11,16]  |
| chr7:44218718   | YKT6     | UTR3        |                                                                                          | + | TtoG | 0.1667 | 0.2    | 2  | 2  | [16,18]  |
| chr7:44220123   | YKT6     | UTR3        |                                                                                          | + | CtoG | 0.5319 | 0.5714 | 2  | 2  | [47,98]  |
| chr14:74318071  | YLPM1    | coding_exon |                                                                                          | + | TtoC | 0.1    | 0.1667 | 2  | 2  | [10,12]  |
| chr1:38041920   | YRDC     | UTR3        |                                                                                          | - | CtoG | 0.1    | 0.1    | 2  | 2  | [11,11]  |
| chr4:68862400   | YTHDC1   | UTR3        |                                                                                          | - | AtoG | 0.1    | 0.1    | 2  | 2  | [10,10]  |
| chr4:68862406   | YTHDC1   | UTR3        |                                                                                          | - | TtoG | 0.1    | 0.1    | 8  | 2  | [10,22]  |
| chr5:112954796  | YTHDC2   | coding_exon | ENST00000161863:IttoV;                                                                   | + | AtoG | 0.1667 | 0.1765 | 4  | 2  | [12,17]  |
| chr20:61297592  | YTHDF1   | UTR3        |                                                                                          | - | AtoG | 0.1176 | 0.1429 | 5  | 3  | [14,17]  |
| chr20:61298365  | YTHDF1   | UTR3        |                                                                                          | - | CtoG | 0.1    | 0.1333 | 3  | 2  | [10,15]  |
| chr20:61298366  | YTHDF1   | UTR3        |                                                                                          | - | CtoA | 0.1    | 0.1333 | 3  | 2  | [10,15]  |
| chr17:1195095   | YWHAE    | UTR3        |                                                                                          | - | AtoG | 0.1275 | 0.1364 | 11 | 2  | [45,102] |
| chr17:1195352   | YWHAE    | UTR3        |                                                                                          | - | GtoT | 0.15   | 0.3793 | 6  | 6  | [14,40]  |
| chr17:1195353   | YWHAE    | UTR3        |                                                                                          | - | GtoT | 0.1    | 0.2083 | 8  | 5  | [10,28]  |
| chr7:75794539   | YWHAG    | UTR3        |                                                                                          | - | TtoC | 0.1    | 0.1429 | 2  | 2  | [10,14]  |
| chr22:30683342  | YWHAH    | UTR3        |                                                                                          | + | AtoG | 0.1429 | 0.1818 | 6  | 2  | [11,21]  |
| chr14:99814191  | YY1      | UTR3        |                                                                                          | + | AtoG | 0.1111 | 0.1875 | 7  | 3  | [11,18]  |
| chr14:99817006  | YY1      | UTR3        |                                                                                          | + | TtoA | 0.1    | 0.1333 | 3  | 2  | [10,15]  |
| chr22:36381969  | Z83844.4 | mixed       |                                                                                          | - | AtoT | 0.1176 | 0.1364 | 8  | 2  | [17,23]  |
| chr20:43140205  | Z93016.1 | mixed       |                                                                                          | + | AtoG | 0.2    | 0.2    | 2  | 2  | [10,11]  |
| chr20:43140622  | Z93016.1 | mixed       |                                                                                          | + | CtoT | 0.1    | 0.1053 | 3  | 2  | [10,19]  |
| chr6:34360625   | Z98036.1 | mixed       |                                                                                          | + | AtoG | 0.1    | 0.1    | 2  | 2  | [10,10]  |
| chr14:64058309  | ZBTB1    | coding_exon | ENST00000358738:CtoS;                                                                    | + | TtoA | 0.1    | 0.1053 | 2  | 2  | [10,19]  |
| chr14:64058968  | ZBTB1    | coding_exon |                                                                                          | + | AtoG | 0.1    | 0.1333 | 4  | 3  | [10,15]  |
| chr6:151727342  | ZBTB2    | UTR3        |                                                                                          | - | AtoG | 0.1    | 0.2    | 6  | 2  | [10,10]  |
| chr6:33390372   | ZBTB2    | UTR3        |                                                                                          | - | AtoG | 0.1    | 0.2    | 4  | 2  | [10,10]  |
| chr14:64026892  | ZBTB25   | coding_exon | ENST00000261683:HtoR;ENST00000394715:HtoR;                                               | - | AtoG | 0.1538 | 0.1667 | 4  | 2  | [12,14]  |
| chr14:64024018  | ZBTB25   | coding_exon |                                                                                          | - | CtoG | 0.1    | 0.1    | 2  | 2  | [10,10]  |
| chr19:40898247  | ZBTB32   | coding_exon | ENST00000262630:QtoH;ENST00000392197:QtoH;                                               | + | GtoC | 0.1    | 0.1333 | 8  | 3  | [15,57]  |
| chr19:40898744  | ZBTB32   | coding_exon | ENST00000262630:HtoP;ENST00000392197:HtoP;                                               | + | AtoC | 0.1053 | 0.1707 | 4  | 2  | [19,41]  |
| chr19:40898882  | ZBTB32   | coding_exon |                                                                                          | + | GtoT | 1      | 1      | 13 | 13 | [21,136] |
| chr3:142647519  | ZBTB38   | coding_exon | ENST00000441582:IttoN;                                                                   | + | TtoA | 0.1    | 0.1    | 2  | 2  | [10,10]  |
| chr3:142647514  | ZBTB38   | coding_exon |                                                                                          | + | AtoG | 0.1176 | 0.3    | 8  | 3  | [10,17]  |
| chr3:142648706  | ZBTB38   | mixed       |                                                                                          | + | CtoT | 0.1    | 0.1    | 3  | 2  | [10,10]  |
| chr17:7303719   | ZBTB4    | UTR3        |                                                                                          | - | TtoC | 0.1667 | 0.2    | 4  | 2  | [11,12]  |
| chr17:7305208   | ZBTB4    | UTR3        |                                                                                          | - | TtoC | 0.1    | 0.1    | 5  | 2  | [10,10]  |
| chr17:7305735   | ZBTB4    | UTR3        |                                                                                          | - | AtoG | 0.1176 | 0.2143 | 2  | 2  | [14,17]  |
| chr1:22701478   | ZBTB40   | coding_exon | ENST00000375647:LtoP;ENST00000404138:LtoP;                                               | + | TtoC | 0.1    | 0.1    | 2  | 2  | [10,10]  |
| chr11:129614934 | ZBTB44   | coding_exon |                                                                                          | - | TtoC | 0.1    | 0.1667 | 2  | 2  | [10,12]  |
| chr11:129606810 | ZBTB44   | UTR3        |                                                                                          | - | TtoC | 0.1    | 0.1667 | 2  | 2  | [10,12]  |
| chr1:6571666    | ZBTB48   | coding_exon | ENST00000377674:VtoA;                                                                    | + | TtoC | 0.1053 | 0.3    | 2  | 2  | [10,19]  |
| chr1:6570948    | ZBTB48   | coding_exon | ENST00000377674:TtoA;                                                                    | + | AtoG | 0.1    | 0.1    | 2  | 2  | [10,10]  |
| chr9:37429528   | ZBTB5    | mixed       |                                                                                          | - | TtoG | 0.1    | 0.1    | 2  | 2  | [10,10]  |
| chr19:3997533   | ZBTB7A   | UTR3        |                                                                                          | - | GtoA | 0.1    | 0.1364 | 6  | 2  | [10,22]  |
| chr1:32872237   | ZBTB80S  | coding_exon | ENST00000373501:LtoP;ENST00000468695:LtoP;                                               | - | TtoC | 0.1333 | 0.1818 | 5  | 2  | [11,16]  |
| chr1:32888721   | ZBTB80S  | mixed       |                                                                                          | - | AtoT | 0.1    | 0.1    | 2  | 2  | [10,10]  |
| chr1:202083159  | ZC3H11A  | coding_exon | ENST00000332127:QtoK;ENST00000367210:QtoK;ENST00000367212:QtoK;ENST00000367212:QtoK;     | + | CtoA | 0.1111 | 0.1538 | 5  | 2  | [13,18]  |
| chr1:202032052  | ZC3H11A  | UTR5        |                                                                                          | + | TtoA | 0.1    | 0.1667 | 3  | 2  | [10,12]  |
| chr1:202032061  | ZC3H11A  | UTR5        |                                                                                          | + | GtoT | 0.1    | 0.1    | 2  | 2  | [10,10]  |
| chr6:149811911  | ZC3H12D  | UTR3        |                                                                                          | - | AtoG | 0.1    | 0.3333 | 5  | 5  | [10,18]  |
| chr6:149813084  | ZC3H12D  | UTR3        |                                                                                          | - | TtoA | 0.1    | 0.1667 | 3  | 2  | [10,12]  |
| chr14:88109084  | ZC3H14   | coding_exon | ENST00000251038:StoP;ENST00000302216:StoP;ENST00000336693:StoP;ENST00000336693:StoP;     | + | TtoC | 0.1    | 0.1    | 4  | 2  | [10,10]  |
| chr2:187077158  | ZC3H15   | coding_exon | ENST00000337859:IttoS;                                                                   | + | TtoG | 0.1071 | 0.1818 | 3  | 3  | [11,29]  |

|                 |         |             |                                                                        |   |      |        |        |    |   |         |
|-----------------|---------|-------------|------------------------------------------------------------------------|---|------|--------|--------|----|---|---------|
| chr8:144691720  | ZC3H3   | coding_exon |                                                                        | - | TtoC | 0.1    | 0.1667 | 2  | 2 | [10,12] |
| chr19:52259453  | ZC3H4   | UTR3        |                                                                        | - | TtoC | 0.1    | 0.1333 | 3  | 2 | [10,15] |
| chr19:52259871  | ZC3H4   | UTR3        |                                                                        | - | TtoC | 0.1    | 0.1429 | 2  | 2 | [10,14] |
| chr16:11768835  | ZC3H7A  | coding_exon | ENST00000355758:Wto*;ENST00000396516:Wto*;                             | - | GtoA | 0.1111 | 0.1579 | 3  | 2 | [18,19] |
| chr16:11766917  | ZC3H7A  | coding_exon | ENST00000355758:NtoD;ENST00000396516:NtoD;                             | - | AtoG | 0.1    | 0.1463 | 5  | 2 | [41,50] |
| chr16:11764908  | ZC3H7A  | coding_exon | ENST00000355758:CtoW;ENST00000396516:CtoW;                             | - | TtoG | 0.1026 | 0.1282 | 3  | 2 | [39,39] |
| chr16:11772207  | ZC3H7A  | coding_exon |                                                                        | - | TtoA | 0.1    | 0.125  | 3  | 2 | [10,16] |
| chr16:11752319  | ZC3H7A  | UTR3        |                                                                        | - | AtoG | 0.1333 | 0.1875 | 9  | 2 | [16,16] |
| chr16:11752668  | ZC3H7A  | UTR3        |                                                                        | - | TtoC | 0.1111 | 0.1818 | 5  | 2 | [18,22] |
| chr22:40072086  | ZC3H7B  | coding_exon |                                                                        | + | TtoG | 0.1    | 0.2308 | 3  | 2 | [10,13] |
| chr7:138414923  | ZC3HAV1 | coding_exon | ENST00000242351:VtoA;ENST00000464606:VtoA;ENST00000471652:VtoA;        | - | TtoC | 0.1    | 0.1    | 2  | 2 | [10,10] |
| chr1:52684260   | ZCCHC11 | coding_exon |                                                                        | - | TtoG | 0.1    | 0.1429 | 3  | 2 | [10,14] |
| chr18:58396140  | ZCCHC2  | UTR3        |                                                                        | + | TtoC | 0.1    | 0.1333 | 2  | 2 | [10,15] |
| chr9:88128231   | ZCCHC6  | coding_exon | ENST00000277141:KtoE;ENST00000375960:KtoE;ENST00000375961:KtoE;ENST000 | - | AtoG | 0.1    | 0.1429 | 2  | 2 | [10,14] |
| chr9:37344748   | ZCCHC7  | coding_exon |                                                                        | + | TtoC | 0.1667 | 0.1818 | 4  | 2 | [11,12] |
| chr12:121524058 | ZCCHC8  | coding_exon | ENST00000336229:IttoK;                                                 | - | TtoA | 0.1333 | 0.1818 | 3  | 2 | [11,15] |
| chr12:121528402 | ZCCHC8  | coding_exon |                                                                        | - | AtoG | 0.1    | 0.1818 | 3  | 2 | [10,11] |
| chr12:121532062 | ZCCHC8  | coding_exon |                                                                        | - | TtoA | 0.1    | 0.1    | 3  | 2 | [10,10] |
| chr12:121523769 | ZCCHC8  | UTR3        |                                                                        | - | TtoG | 0.1    | 0.1    | 2  | 2 | [10,10] |
| chr5:80644197   | ZCCHC9  | coding_exon | ENST00000254037:QtoR;ENST00000380199:QtoR;ENST00000407610:QtoR;ENST000 | + | AtoG | 0.1053 | 0.1667 | 6  | 4 | [13,22] |
| chr5:80636504   | ZCCHC9  | coding_exon | ENST00000254037:HtoN;ENST00000380199:HtoN;ENST00000407610:HtoN;ENST000 | + | CtoA | 0.1    | 0.1818 | 2  | 2 | [10,11] |
| chr5:80663686   | ZCCHC9  | coding_exon |                                                                        | + | AtoG | 0.1176 | 0.45   | 2  | 2 | [17,40] |
| chr5:80644368   | ZCCHC9  | UTR3        |                                                                        | + | AtoG | 0.1111 | 0.2222 | 10 | 4 | [14,27] |
| chr1:27051883   | ZDHHC18 | coding_exon | ENST00000374141:YtoS;ENST00000374142:YtoS;                             | + | AtoC | 0.1053 | 0.3    | 4  | 2 | [30,38] |
| chr3:44943305   | ZDHHC3  | coding_exon |                                                                        | - | TtoG | 0.1176 | 0.125  | 7  | 2 | [16,18] |
| chr11:57222844  | ZDHHC5  | coding_exon | ENST00000287169:TtoP;                                                  | + | AtoC | 0.1111 | 0.2    | 3  | 2 | [10,18] |
| chr11:57196665  | ZDHHC5  | UTR5        |                                                                        | + | TtoC | 0.1    | 0.2    | 3  | 2 | [10,10] |
| chr11:57196834  | ZDHHC5  | UTR5        |                                                                        | + | TtoA | 0.1    | 0.1    | 5  | 2 | [10,21] |
| chr16:83566621  | ZDHHC7  | UTR3        |                                                                        | - | TtoG | 0.1    | 0.1    | 3  | 2 | [10,11] |
| chr10:31850289  | ZEB1    | coding_exon | ENST00000320985:TtoP;ENST00000437844:TtoP;ENST00000446923:TtoP;        | + | AtoC | 0.1    | 0.1111 | 2  | 2 | [10,10] |
| chr10:31824722  | ZEB1    | coding_exon | ENST00000320985:RtoG;ENST00000446923:RtoG;                             | + | AtoG | 1      | 1      | 5  | 5 | [12,28] |
| chr10:31831369  | ZEB1    | coding_exon | ENST00000320985:AtoD;ENST00000437844:AtoD;ENST00000446923:AtoD;        | + | CtoA | 0.1    | 0.1    | 2  | 2 | [10,10] |
| chr9:130555307  | ZER1    | coding_exon | ENST00000291900:StoP;                                                  | - | TtoC | 0.1    | 0.1538 | 2  | 2 | [10,13] |
| chr9:130537448  | ZER1    | coding_exon | ENST00000291900:TtoP;                                                  | - | TtoC | 0.1    | 0.1    | 2  | 2 | [10,10] |
| chr9:130554928  | ZER1    | coding_exon |                                                                        | - | CtoT | 0.1    | 0.1    | 2  | 2 | [10,20] |
| chr7:1159101    | ZFAND2A | mixed       |                                                                        | - | TtoC | 0.1    | 0.2    | 5  | 2 | [10,10] |
| chr6:38229303   | ZFAND3  | UTR3        |                                                                        | + | TtoG | 0.1    | 0.1429 | 9  | 3 | [14,61] |
| chr9:74156396   | ZFAND5  | UTR3        |                                                                        | - | GtoA | 0.8667 | 1      | 6  | 6 | [13,34] |
| chr9:74156452   | ZFAND5  | UTR3        |                                                                        | - | AtoG | 0.8    | 1      | 6  | 6 | [13,30] |
| chr9:74156457   | ZFAND5  | UTR3        |                                                                        | - | TtoC | 0.8824 | 1      | 6  | 6 | [10,20] |
| chr9:74159377   | ZFAND5  | UTR3        |                                                                        | - | TtoC | 0.2    | 0.25   | 2  | 2 | [10,12] |
| chr8:135665258  | ZFAT    | coding_exon | ENST00000377838:DtoE;ENST00000429442:DtoE;                             | - | TtoA | 0.1111 | 0.2143 | 8  | 4 | [14,38] |
| chr8:135665259  | ZFAT    | coding_exon | ENST00000377838:DtoA;ENST00000429442:DtoA;                             | - | AtoC | 0.1111 | 0.2143 | 7  | 2 | [14,36] |
| chr12:70290744  | ZFC3H1  | coding_exon | ENST00000378743:DtoH;                                                  | - | GtoC | 0.1333 | 0.1667 | 6  | 3 | [12,15] |
| chr12:70290742  | ZFC3H1  | coding_exon | ENST00000378743:DtoE;                                                  | - | TtoG | 0.1111 | 0.2308 | 7  | 5 | [13,18] |
| chr12:70290045  | ZFC3H1  | UTR3        |                                                                        | - | TtoC | 0.1818 | 0.3    | 2  | 2 | [10,11] |
| chr15:40527593  | ZFP106  | coding_exon | ENST00000263805:QtoR;ENST00000434903:QtoR;                             | - | AtoG | 0.1    | 0.2308 | 5  | 3 | [10,27] |
| chr15:40518150  | ZFP106  | coding_exon | ENST00000263805:EtoK;ENST00000434903:EtoK;                             | - | GtoA | 0.1    | 0.1111 | 3  | 2 | [10,18] |
| chr15:40492508  | ZFP106  | UTR3        |                                                                        | - | TtoC | 0.1    | 0.125  | 4  | 2 | [10,16] |
| chr15:40495111  | ZFP106  | UTR3        |                                                                        | - | GtoT | 0.1111 | 0.1667 | 2  | 2 | [10,18] |
| chr15:40495522  | ZFP106  | UTR3        |                                                                        | - | TtoC | 0.1    | 0.2    | 7  | 2 | [10,15] |
| chr14:68326341  | ZFP36L1 | coding_exon | ENST00000336440:TtoP;ENST00000435246:TtoP;ENST00000439696:TtoP;        | - | AtoC | 0.1111 | 0.1818 | 2  | 2 | [11,18] |
| chr14:68326936  | ZFP36L1 | coding_exon |                                                                        | - | TtoC | 0.1    | 0.1067 | 11 | 4 | [48,90] |
| chr14:68324189  | ZFP36L1 | UTR3        |                                                                        | - | AtoC | 0.2    | 0.4    | 2  | 2 | [10,15] |
| chr14:68324239  | ZFP36L1 | UTR3        |                                                                        | - | TtoC | 0.1    | 0.2222 | 14 | 8 | [10,62] |
| chr5:180207311  | ZFP62   | mixed       |                                                                        | - | AtoC | 0.1    | 0.1    | 2  | 2 | [10,10] |
| chr16:67157887  | ZFP90   | UTR3        |                                                                        | + | CtoG | 0.1    | 0.1    | 2  | 2 | [10,10] |
| chr16:67158133  | ZFP90   | UTR3        |                                                                        | + | TtoC | 0.1    | 0.1    | 2  | 2 | [10,10] |
| chr11:58134014  | ZFP91   | coding_exon | ENST00000316059:RtoQ;                                                  | + | GtoA | 0.1333 | 0.48   | 2  | 2 | [16,25] |
| chr11:58138282  | ZFP91   | coding_exon | ENST00000316059:HtoR;                                                  | + | AtoG | 0.1    | 0.1111 | 2  | 2 | [10,18] |
| chr11:58141943  | ZFP91   | UTR3        |                                                                        | + | TtoC | 0.1    | 0.1333 | 4  | 2 | [10,16] |
| chr11:58141984  | ZFP91   | UTR3        |                                                                        | + | CtoA | 0.1429 | 0.2    | 3  | 2 | [10,14] |
| chr11:58142134  | ZFP91   | UTR3        |                                                                        | + | TtoC | 0.1    | 0.1    | 4  | 2 | [10,10] |
| chr11:58144746  | ZFP91   | UTR3        |                                                                        | + | AtoG | 0.1    | 0.1    | 5  | 3 | [10,10] |
| chr11:64608423  | ZFPL1   | UTR5        |                                                                        | + | TtoC | 0.1    | 0.1481 | 3  | 2 | [10,27] |
| chr5:32431151   | ZFR     | coding_exon | ENST00000265069:DtoA;ENST00000382126:DtoA;                             | - | AtoC | 0.1    | 0.1    | 4  | 2 | [10,10] |
| chr3:15098906   | ZFYVE20 | mixed       |                                                                        | - | AtoG | 0.1    | 0.1    | 2  | 2 | [10,10] |
| chr3:15086634   | ZFYVE20 | UTR3        |                                                                        | - | TtoC | 0.1    | 0.1    | 3  | 2 | [10,10] |
| chr3:15087086   | ZFYVE20 | UTR3        |                                                                        | - | AtoG | 0.1    | 0.1    | 2  | 2 | [10,10] |
| chr14:67317990  | ZFYVE26 | coding_exon | ENST00000347230:GtoA;ENST00000411699:GtoA;                             | - | GtoC | 0.1    | 0.1    | 2  | 2 | [10,20] |
| chr14:67284595  | ZFYVE26 | mixed       |                                                                        | - | AtoG | 0.1    | 0.1176 | 2  | 2 | [10,17] |
| chr20:61810645  | ZGPAT   | coding_exon | ENST00000328969:VtoE;ENST00000355969:VtoE;ENST00000357119:VtoE;ENST000 | + | TtoA | 0.1    | 0.1333 | 5  | 2 | [10,16] |
| chr7:99470075   | ZKSCAN1 | UTR3        |                                                                        | + | TtoC | 0.1053 | 0.1818 | 4  | 2 | [11,19] |
| chr5:140066178  | ZMAT2   | UTR3        |                                                                        | + | TtoA | 0.1111 | 0.1111 | 13 | 2 | [18,28] |
| chr3:180218544  | ZMAT3   | UTR3        |                                                                        | - | TtoC | 0.1    | 0.1667 | 7  | 2 | [10,12] |
| chr3:180224958  | ZMAT3   | UTR3        |                                                                        | - | AtoG | 0.1538 | 0.1818 | 4  | 3 | [11,13] |
| chr10:80745567  | ZMIZ1   | UTR3        |                                                                        | + | TtoA | 0.1    | 0.1    | 4  | 2 | [10,10] |
| chr10:80746037  | ZMIZ1   | UTR3        |                                                                        | + | TtoC | 0.1    | 0.1538 | 7  | 4 | [15,39] |
| chr7:44774819   | ZMIZ2   | UTR3        |                                                                        | + | CtoG | 0.1    | 0.1111 | 9  | 2 | [10,18] |
| chr1:35643236   | ZMYM4   | coding_exon | ENST00000314607:VtoG;ENST00000373297:VtoG;                             | + | TtoG | 0.1    | 0.1    | 2  | 2 | [10,10] |
| chr1:35637697   | ZMYM4   | coding_exon | ENST00000314607:QtoL;ENST00000373297:QtoL;                             | + | AtoT | 0.1    | 0.1    | 3  | 2 | [10,10] |
| chr1:35657824   | ZMYM4   | coding_exon | ENST00000314607:KtoE;ENST00000373297:KtoE;                             | + | AtoG | 0.1    | 0.125  | 3  | 2 | [10,16] |
| chr9:39596556   | ZMYND19 | UTR3        |                                                                        | - | GtoT | 0.1    | 0.1    | 3  | 2 | [10,10] |
| chr20:45271767  | ZMYND8  | UTR3        |                                                                        | - | AtoG | 0.1    | 0.1034 | 9  | 2 | [29,30] |
| chr20:45272121  | ZMYND8  | UTR3        |                                                                        | - | GtoA | 0.1    | 0.1579 | 10 | 5 | [17,23] |
| chr19:19649776  | ZNF101  | coding_exon | ENST00000318110:TtoI;                                                  | + | CtoT | 0.1    | 0.1    | 2  | 2 | [10,10] |
| chr20:18244546  | ZNF133  | coding_exon | ENST00000316358:EtoK;ENST00000377671:EtoK;ENST00000396026:EtoK;ENST000 | + | GtoA | 0.1    | 0.1111 | 2  | 2 | [10,18] |
| chr19:62824552  | ZNF134  | coding_exon | ENST00000396161:HtoP;                                                  | + | AtoC | 0.1    | 0.1053 | 4  | 2 | [10,19] |
| chr19:62824763  | ZNF134  | UTR3        |                                                                        | + | AtoG | 0.1    | 0.1    | 2  | 2 | [10,10] |
| chr2:219215275  | ZNF142  | coding_exon | ENST00000336124:HtoP;ENST00000396788:HtoP;ENST00000411696:HtoP;ENST000 | - | AtoC | 0.1    | 0.2    | 2  | 2 | [10,10] |
| chr2:219215249  | ZNF142  | coding_exon | ENST00000336124:AtoS;ENST00000396788:AtoS;ENST00000411696:AtoS;ENST000 | - | GtoT | 0.1    | 0.1429 | 2  | 2 | [10,14] |
| chr11:9452117   | ZNF143  | coding_exon | ENST00000299606:YtoD;ENST00000396597:YtoD;ENST00000396602:YtoD;ENST000 | + | TtoG | 0.1    | 0.1429 | 2  | 2 | [10,14] |
| chr11:9452115   | ZNF143  | coding_exon | ENST00000299606:AtoD;ENST00000396597:AtoD;ENST00000396602:AtoD;ENST000 | + | CtoA | 0.1    | 0.1    | 2  | 2 | [10,10] |
| chr19:41419600  | ZNF146  | coding_exon | ENST00000301233:KtoE;ENST00000428827:KtoE;ENST00000443387:KtoE;ENST000 | + | AtoG | 0.1    | 0.125  | 3  | 2 | [10,17] |
| chr3:126435414  | ZNF148  | coding_exon | ENST00000360647:DtoE;ENST00000484491:DtoE;ENST00000485866:DtoE;ENST000 | - | CtoA | 0.1    | 0.1667 | 4  | 3 | [10,32] |
| chr3:126435415  | ZNF148  | coding_exon | ENST00000360647:DtoA;ENST00000484491:DtoA;ENST00000485866:DtoA;ENST000 | - | AtoC | 0.1    | 0.125  | 2  | 2 | [10,24] |

|                 |         |             |                                                                                                                                                                                                                                                                                                                                      |   |       |        |        |   |   |         |
|-----------------|---------|-------------|--------------------------------------------------------------------------------------------------------------------------------------------------------------------------------------------------------------------------------------------------------------------------------------------------------------------------------------|---|-------|--------|--------|---|---|---------|
| chr6:28303212   | ZNF193  | coding_exon | ENST00000252207:VtoG;ENST00000425468:VtoG;                                                                                                                                                                                                                                                                                           | + | TtoG  | 0.1538 | 0.2    | 2 | 2 | [10,13] |
| chr11:3336964   | ZNF195  | coding_exon | ENST0000005082:QtoR;ENST00000343338:QtoR;ENST00000354599:QtoR;ENST00000005082:KtoN;ENST00000343338:KtoN;ENST00000354599:KtoN;ENST00000005082:KtoE;ENST00000343338:KtoE;ENST00000354599:KtoE;ENST00000005082:EttoD;ENST00000343338:EttoD;ENST00000354599:EttoD;ENST00000005082:EttoA;ENST00000343338:EttoA;ENST00000354599:EttoA;     | - | AttoG | 0.1    | 0.1111 | 2 | 2 | [10,18] |
| chr11:3337107   | ZNF195  | coding_exon | ENST00000005082:KtoN;ENST00000343338:KtoN;ENST00000354599:KtoN;ENST00000005082:KtoE;ENST00000343338:KtoE;ENST00000354599:KtoE;ENST00000005082:EttoD;ENST00000343338:EttoD;ENST00000354599:EttoD;ENST00000005082:EttoA;ENST00000343338:EttoA;ENST00000354599:EttoA;                                                                   | - | GtoT  | 0.1    | 0.1    | 3 | 2 | [10,10] |
| chr11:3337751   | ZNF195  | coding_exon | ENST00000005082:KtoE;ENST00000343338:KtoE;ENST00000354599:KtoE;ENST00000005082:EttoD;ENST00000343338:EttoD;ENST00000354599:EttoD;ENST00000005082:EttoA;ENST00000343338:EttoA;ENST00000354599:EttoA;                                                                                                                                  | - | AttoG | 0.1    | 0.1818 | 2 | 2 | [10,11] |
| chr11:3337572   | ZNF195  | coding_exon | ENST00000005082:EttoD;ENST00000343338:EttoD;ENST00000354599:EttoD;ENST00000005082:EttoA;ENST00000343338:EttoA;ENST00000354599:EttoA;                                                                                                                                                                                                 | - | AttoC | 0.1    | 0.1    | 2 | 2 | [10,10] |
| chr11:3337269   | ZNF195  | coding_exon | ENST00000005082:EttoD;ENST00000343338:EttoD;ENST00000354599:EttoD;ENST00000005082:EttoA;ENST00000343338:EttoA;ENST00000354599:EttoA;                                                                                                                                                                                                 | - | CtoA  | 0.1    | 0.1    | 2 | 2 | [10,10] |
| chr11:3338310   | ZNF195  | coding_exon | ENST00000005082:EttoD;ENST00000343338:EttoD;ENST00000354599:EttoD;ENST00000005082:EttoA;ENST00000343338:EttoA;ENST00000354599:EttoA;                                                                                                                                                                                                 | - | AttoG | 0.1    | 0.25   | 5 | 2 | [10,12] |
| chr11:3336317   | ZNF195  | UTR3        | ENST00000005082:EttoD;ENST00000343338:EttoD;ENST00000354599:EttoD;ENST00000005082:EttoA;ENST00000343338:EttoA;ENST00000354599:EttoA;                                                                                                                                                                                                 | - | AttoG | 0.1    | 0.1818 | 2 | 2 | [10,12] |
| chr17:27732449  | ZNF207  | UTR3        | ENST00000005082:EttoD;ENST00000343338:EttoD;ENST00000354599:EttoD;ENST00000005082:EttoA;ENST00000343338:EttoA;ENST00000354599:EttoA;                                                                                                                                                                                                 | + | TtoC  | 0.1    | 0.125  | 2 | 2 | [10,17] |
| chr19:62845045  | ZNF211  | coding_exon | ENST00000240731:KtoR;ENST00000299871:KtoR;ENST00000347302:KtoR;ENST00000005082:KtoN;ENST00000343338:KtoN;ENST00000354599:KtoN;ENST00000005082:KtoE;ENST00000343338:KtoE;ENST00000354599:KtoE;ENST00000005082:EttoD;ENST00000343338:EttoD;ENST00000354599:EttoD;ENST00000005082:EttoA;ENST00000343338:EttoA;ENST00000354599:EttoA;    | + | AttoG | 0.1    | 0.1538 | 2 | 2 | [10,13] |
| chr17:148583249 | ZNF212  | UTR3        | ENST00000005082:EttoD;ENST00000343338:EttoD;ENST00000354599:EttoD;ENST00000005082:EttoA;ENST00000343338:EttoA;ENST00000354599:EttoA;                                                                                                                                                                                                 | + | GtoA  | 0.1    | 0.1    | 2 | 2 | [10,10] |
| chr16:3132365   | ZNF213  | UTR3        | ENST00000005082:EttoD;ENST00000343338:EttoD;ENST00000354599:EttoD;ENST00000005082:EttoA;ENST00000343338:EttoA;ENST00000354599:EttoA;                                                                                                                                                                                                 | + | AttoC | 0.2    | 0.3333 | 4 | 3 | [10,12] |
| chr16:3132453   | ZNF213  | UTR3        | ENST00000005082:EttoD;ENST00000343338:EttoD;ENST00000354599:EttoD;ENST00000005082:EttoA;ENST00000343338:EttoA;ENST00000354599:EttoA;                                                                                                                                                                                                 | + | TtoC  | 0.1    | 0.1    | 2 | 2 | [10,10] |
| chr16:3132478   | ZNF213  | UTR3        | ENST00000005082:EttoD;ENST00000343338:EttoD;ENST00000354599:EttoD;ENST00000005082:EttoA;ENST00000343338:EttoA;ENST00000354599:EttoA;                                                                                                                                                                                                 | + | CtoT  | 0.1818 | 0.3333 | 4 | 3 | [10,24] |
| chr20:51626913  | ZNF217  | mixed       | ENST00000005082:EttoD;ENST00000343338:EttoD;ENST00000354599:EttoD;ENST00000005082:EttoA;ENST00000343338:EttoA;ENST00000354599:EttoA;                                                                                                                                                                                                 | - | TtoC  | 0.1    | 0.1875 | 2 | 2 | [10,16] |
| chr20:51631441  | ZNF217  | mixed       | ENST00000005082:EttoD;ENST00000343338:EttoD;ENST00000354599:EttoD;ENST00000005082:EttoA;ENST00000343338:EttoA;ENST00000354599:EttoA;                                                                                                                                                                                                 | - | AttoG | 0.1333 | 0.1333 | 2 | 2 | [15,15] |
| chr19:49304271  | ZNF225  | mixed       | ENST00000005082:EttoD;ENST00000343338:EttoD;ENST00000354599:EttoD;ENST00000005082:EttoA;ENST00000343338:EttoA;ENST00000354599:EttoA;                                                                                                                                                                                                 | + | AttoC | 0.1    | 0.1053 | 2 | 2 | [10,19] |
| chr19:49368112  | ZNF226  | coding_exon | ENST00000300823:AttoG;ENST00000337433:AttoG;ENST00000413984:AttoG;ENST00000005082:KtoN;ENST00000343338:KtoN;ENST00000354599:KtoN;ENST00000005082:KtoE;ENST00000343338:KtoE;ENST00000354599:KtoE;ENST00000005082:EttoD;ENST00000343338:EttoD;ENST00000354599:EttoD;ENST00000005082:EttoA;ENST00000343338:EttoA;ENST00000354599:EttoA; | + | CtoG  | 0.1    | 0.1053 | 3 | 2 | [10,19] |
| chr19:49366028  | ZNF226  | UTR5        | ENST00000300823:AttoG;ENST00000337433:AttoG;ENST00000413984:AttoG;ENST00000005082:KtoN;ENST00000343338:KtoN;ENST00000354599:KtoN;ENST00000005082:KtoE;ENST00000343338:KtoE;ENST00000354599:KtoE;ENST00000005082:EttoD;ENST00000343338:EttoD;ENST00000354599:EttoD;ENST00000005082:EttoA;ENST00000343338:EttoA;ENST00000354599:EttoA; | + | TtoG  | 0.1    | 0.1    | 3 | 2 | [10,10] |
| chr19:49424467  | ZNF227  | coding_exon | ENST00000313040:VtoG;                                                                                                                                                                                                                                                                                                                | + | TtoG  | 0.1    | 0.25   | 3 | 3 | [10,14] |
| chr19:49431590  | ZNF227  | coding_exon | ENST00000313040:FtoL;                                                                                                                                                                                                                                                                                                                | + | CtoA  | 0.1    | 0.1    | 2 | 2 | [10,10] |
| chr17:4953459   | ZNF232  | coding_exon | ENST00000250076:VtoG;ENST00000381274:VtoG;ENST00000416429:VtoG;                                                                                                                                                                                                                                                                      | - | TtoG  | 0.125  | 0.2    | 3 | 2 | [10,16] |
| chr11:116154489 | ZNF259  | UTR3        | ENST00000250076:VtoG;ENST00000381274:VtoG;ENST00000416429:VtoG;                                                                                                                                                                                                                                                                      | - | TtoC  | 0.1818 | 0.3    | 5 | 2 | [10,11] |
| chr16:3280309   | ZNF263  | coding_exon | ENST00000219069:KtoR;                                                                                                                                                                                                                                                                                                                | + | AttoG | 0.1    | 0.1    | 2 | 2 | [10,10] |
| chr16:3280363   | ZNF263  | coding_exon | ENST00000219069:KtoR;                                                                                                                                                                                                                                                                                                                | + | TtoC  | 0.1    | 0.1    | 2 | 2 | [10,10] |
| chr19:9385869   | ZNF266  | coding_exon | ENST00000361151:EttoD;ENST00000361451:EttoD;ENST00000393865:EttoD;ENST00000005082:KtoN;ENST00000343338:KtoN;ENST00000354599:KtoN;ENST00000005082:KtoE;ENST00000343338:KtoE;ENST00000354599:KtoE;ENST00000005082:EttoD;ENST00000343338:EttoD;ENST00000354599:EttoD;ENST00000005082:EttoA;ENST00000343338:EttoA;ENST00000354599:EttoA; | - | GtoT  | 0.1    | 0.1    | 2 | 2 | [10,10] |
| chr19:9385422   | ZNF266  | coding_exon | ENST00000361151:EttoD;ENST00000361451:EttoD;ENST00000393865:EttoD;ENST00000005082:KtoN;ENST00000343338:KtoN;ENST00000354599:KtoN;ENST00000005082:KtoE;ENST00000343338:KtoE;ENST00000354599:KtoE;ENST00000005082:EttoD;ENST00000343338:EttoD;ENST00000354599:EttoD;ENST00000005082:EttoA;ENST00000343338:EttoA;ENST00000354599:EttoA; | - | TtoC  | 0.1053 | 0.1333 | 3 | 2 | [15,19] |
| chr19:9406835   | ZNF266  | UTR5        | ENST00000361151:EttoD;ENST00000361451:EttoD;ENST00000393865:EttoD;ENST00000005082:KtoN;ENST00000343338:KtoN;ENST00000354599:KtoN;ENST00000005082:KtoE;ENST00000343338:KtoE;ENST00000354599:KtoE;ENST00000005082:EttoD;ENST00000343338:EttoD;ENST00000354599:EttoD;ENST00000005082:EttoA;ENST00000343338:EttoA;ENST00000354599:EttoA; | - | CtoG  | 0.1    | 0.2    | 4 | 4 | [10,10] |
| chr16:31833523  | ZNF267  | coding_exon | ENST00000300870:QtoR;ENST00000394846:QtoR;                                                                                                                                                                                                                                                                                           | + | AttoG | 0.1    | 0.125  | 2 | 2 | [10,16] |
| chr16:31840004  | ZNF267  | coding_exon | ENST00000300870:QtoR;ENST00000394846:QtoR;                                                                                                                                                                                                                                                                                           | + | AttoC | 0.1    | 0.1    | 3 | 2 | [10,10] |
| chr19:63415345  | ZNF274  | coding_exon | ENST00000326804:EttoG;ENST00000345813:EttoG;ENST00000424679:EttoG;                                                                                                                                                                                                                                                                   | + | AttoG | 0.1    | 0.1    | 2 | 2 | [10,10] |
| chr16:88332010  | ZNF276  | coding_exon | ENST00000289816:HtoP;ENST00000443381:HtoP;ENST00000446326:HtoP;                                                                                                                                                                                                                                                                      | + | AttoC | 0.1154 | 0.1333 | 2 | 2 | [16,27] |
| chr19:58262554  | ZNF28   | mixed       | ENST00000289816:HtoP;ENST00000443381:HtoP;ENST00000446326:HtoP;                                                                                                                                                                                                                                                                      | - | TtoC  | 0.125  | 0.1818 | 5 | 3 | [11,16] |
| chr19:58263869  | ZNF28   | mixed       | ENST00000289816:HtoP;ENST00000443381:HtoP;ENST00000446326:HtoP;                                                                                                                                                                                                                                                                      | - | CtoA  | 0.1    | 0.1    | 2 | 2 | [10,10] |
| chr11:198644281 | ZNF281  | coding_exon | ENST00000289816:HtoP;ENST00000443381:HtoP;ENST00000446326:HtoP;                                                                                                                                                                                                                                                                      | - | TtoA  | 0.1    | 0.1    | 2 | 2 | [10,10] |
| chr11:198642703 | ZNF281  | UTR3        | ENST00000289816:HtoP;ENST00000443381:HtoP;ENST00000446326:HtoP;                                                                                                                                                                                                                                                                      | - | AttoG | 0.1    | 0.1818 | 2 | 2 | [10,11] |
| chr7:148553389  | ZNF282  | UTR3        | ENST00000289816:HtoP;ENST00000443381:HtoP;ENST00000446326:HtoP;                                                                                                                                                                                                                                                                      | + | AttoC | 0.1    | 0.1    | 2 | 2 | [10,10] |
| chr6:88024545   | ZNF292  | coding_exon | ENST00000289816:HtoP;ENST00000443381:HtoP;ENST00000446326:HtoP;                                                                                                                                                                                                                                                                      | + | TtoG  | 0.1    | 0.1333 | 3 | 2 | [10,15] |
| chr6:88026537   | ZNF292  | coding_exon | ENST00000289816:HtoP;ENST00000443381:HtoP;ENST00000446326:HtoP;                                                                                                                                                                                                                                                                      | + | TtoC  | 0.1111 | 0.2    | 5 | 2 | [10,18] |
| chr6:88029921   | ZNF292  | UTR3        | ENST00000289816:HtoP;ENST00000443381:HtoP;ENST00000446326:HtoP;                                                                                                                                                                                                                                                                      | + | TtoC  | 0.1    | 0.1538 | 3 | 3 | [10,15] |
| chr19:50266832  | ZNF296  | coding_exon | ENST00000303809:HtoP;                                                                                                                                                                                                                                                                                                                | - | AttoC | 0.1    | 0.2    | 4 | 3 | [10,17] |
| chr7:99511125   | ZNF3    | coding_exon | ENST00000303809:HtoP;                                                                                                                                                                                                                                                                                                                | - | TtoG  | 0.1    | 0.1    | 3 | 2 | [10,10] |
| chr7:99505829   | ZNF3    | mixed       | ENST00000303809:HtoP;                                                                                                                                                                                                                                                                                                                | - | AttoG | 0.1    | 0.1    | 2 | 2 | [10,10] |
| chr19:9127656   | ZNF317  | mixed       | ENST00000303809:HtoP;                                                                                                                                                                                                                                                                                                                | + | TtoC  | 0.1    | 0.1    | 2 | 2 | [10,10] |
| chr6:43415638   | ZNF318  | coding_exon | ENST00000361428:LtoP;                                                                                                                                                                                                                                                                                                                | - | TtoC  | 0.1176 | 0.125  | 5 | 2 | [16,17] |
| chr6:43432983   | ZNF318  | coding_exon | ENST00000361428:LtoP;                                                                                                                                                                                                                                                                                                                | - | TtoG  | 0.1    | 0.1    | 3 | 2 | [20,70] |
| chr19:63676190  | ZNF324  | UTR3        | ENST00000361428:LtoP;                                                                                                                                                                                                                                                                                                                | + | AttoG | 0.1    | 0.2    | 2 | 2 | [10,10] |
| chr20:44015919  | ZNF335  | coding_exon | ENST00000322927:TtoA;ENST00000426788:TtoA;                                                                                                                                                                                                                                                                                           | - | AttoG | 0.1    | 0.1    | 2 | 2 | [10,10] |
| chr20:44019645  | ZNF335  | coding_exon | ENST00000322927:TtoA;ENST00000426788:TtoA;                                                                                                                                                                                                                                                                                           | - | GtoT  | 0.1    | 0.1    | 2 | 2 | [10,10] |
| chr20:2399416   | ZNF343  | mixed       | ENST00000322927:TtoA;ENST00000426788:TtoA;                                                                                                                                                                                                                                                                                           | - | CtoT  | 0.2    | 0.375  | 5 | 2 | [10,16] |
| chr20:2399417   | ZNF343  | mixed       | ENST00000322927:TtoA;ENST00000426788:TtoA;                                                                                                                                                                                                                                                                                           | - | GtoC  | 0.1111 | 0.3    | 3 | 2 | [11,27] |
| chr19:7490433   | ZNF358  | mixed       | ENST00000322927:TtoA;ENST00000426788:TtoA;                                                                                                                                                                                                                                                                                           | + | TtoC  | 0.1    | 0.1    | 2 | 2 | [10,10] |
| chr12:53049247  | ZNF385A | UTR3        | ENST00000322927:TtoA;ENST00000426788:TtoA;                                                                                                                                                                                                                                                                                           | - | AttoT | 0.1111 | 0.125  | 3 | 2 | [10,17] |
| chr12:53049817  | ZNF385A | UTR3        | ENST00000322927:TtoA;ENST00000426788:TtoA;                                                                                                                                                                                                                                                                                           | - | TtoG  | 0.1    | 0.1053 | 3 | 2 | [10,19] |
| chr8:28259198   | ZNF395  | UTR3        | ENST00000322927:TtoA;ENST00000426788:TtoA;                                                                                                                                                                                                                                                                                           | - | CtoA  | 0.1154 | 0.2069 | 6 | 3 | [23,29] |
| chr8:28259199   | ZNF395  | UTR3        | ENST00000322927:TtoA;ENST00000426788:TtoA;                                                                                                                                                                                                                                                                                           | - | GtoA  | 0.1481 | 0.25   | 5 | 3 | [11,27] |
| chr8:28259213   | ZNF395  | UTR3        | ENST00000322927:TtoA;ENST00000426788:TtoA;                                                                                                                                                                                                                                                                                           | - | CtoA  | 0.1    | 0.2778 | 4 | 3 | [18,20] |
| chr18:70906466  | ZNF407  | UTR3        | ENST00000322927:TtoA;ENST00000426788:TtoA;                                                                                                                                                                                                                                                                                           | + | GtoT  | 0.1    | 0.1176 | 2 | 2 | [10,17] |
| chr11:46682899  | ZNF408  | coding_exon | ENST00000311764:CtoF;                                                                                                                                                                                                                                                                                                                | + | GtoT  | 0.1    | 0.1538 | 3 | 2 | [10,13] |
| chr14:73430377  | ZNF410  | mixed       | ENST00000311764:CtoF;                                                                                                                                                                                                                                                                                                                | + | TtoA  | 0.1    | 0.125  | 4 | 2 | [11,16] |
| chr14:73457490  | ZNF410  | mixed       | ENST00000311764:CtoF;                                                                                                                                                                                                                                                                                                                | + | GtoT  | 0.1    | 0.1    | 2 | 2 | [10,10] |
| chr14:73458559  | ZNF410  | mixed       | ENST00000311764:CtoF;                                                                                                                                                                                                                                                                                                                | + | TtoG  | 0.1176 | 0.1667 | 8 | 2 | [17,20] |
| chr14:73468454  | ZNF410  | UTR3        | ENST00000311764:CtoF;                                                                                                                                                                                                                                                                                                                | + | GtoA  | 0.1    | 0.1    | 3 | 2 | [10,10] |
| chr19:57495492  | ZNF480  | mixed       | ENST00000311764:CtoF;                                                                                                                                                                                                                                                                                                                | + | AttoT | 0.1    | 0.2    | 2 | 2 | [10,10] |
| chr19:12600325  | ZNF490  | mixed       | ENST00000311764:CtoF;                                                                                                                                                                                                                                                                                                                | - | AttoC | 0.1    | 0.1333 | 2 | 2 | [10,15] |
| chr1:245558614  | ZNF496  | coding_exon | ENST00000294753:DtoN;ENST00000366498:DtoN;                                                                                                                                                                                                                                                                                           | - | GtoA  | 0.1    | 0.1    | 3 | 2 | [10,10] |
| chr20:62076933  | ZNF512B | UTR5        | ENST00000294753:DtoN;ENST00000366498:DtoN;                                                                                                                                                                                                                                                                                           | - | TtoC  | 0.1    | 0.125  | 7 | 4 | [10,20] |
| chr20:62134890  | ZNF512B | UTR5        | ENST00000294753:DtoN;ENST00000366498:DtoN;                                                                                                                                                                                                                                                                                           | - | AttoG | 0.1    | 0.2308 | 7 | 4 | [10,25] |
| chr19:63465342  | ZNF544  | coding_exon | ENST00000269829:YtoN;ENST00000415203:YtoN;                                                                                                                                                                                                                                                                                           | + | TtoA  | 0.1    | 0.1818 | 2 | 2 | [11,11] |
| chr19:63465678  | ZNF544  | coding_exon | ENST00000269829:YtoN;ENST00000415203:YtoN;                                                                                                                                                                                                                                                                                           | + | TtoC  | 0.1    | 0.1    | 3 | 2 | [10,10] |
| chr19:63449959  | ZNF544  | coding_exon | ENST00000269829:YtoN;ENST00000415203:YtoN;                                                                                                                                                                                                                                                                                           | + | GtoA  | 0.1    | 0.1    | 2 | 2 | [10,10] |
| chr19:63466351  | ZNF544  | UTR3        | ENST00000269829:YtoN;ENST00000415203:YtoN;                                                                                                                                                                                                                                                                                           | + | AttoG | 0.1818 | 0.1818 | 8 | 2 | [11,11] |
| chr19:62601842  | ZNF548  | coding_exon | ENST00000269829:YtoN;ENST00000415203:YtoN;                                                                                                                                                                                                                                                                                           | + | AttoG | 0.1    | 0.1    | 2 | 2 | [10,10] |
| chr19:8784894   | ZNF558  | coding_exon | ENST00000269829:YtoN;ENST00000415203:YtoN;                                                                                                                                                                                                                                                                                           | - | TtoC  | 0.1    | 0.1667 | 3 | 2 | [10,12] |
| chr19:9315305   | ZNF559  |             |                                                                                                                                                                                                                                                                                                                                      |   |       |        |        |   |   |         |

|                 |         |             |                                                                                      |   |      |        |        |   |   |         |
|-----------------|---------|-------------|--------------------------------------------------------------------------------------|---|------|--------|--------|---|---|---------|
| chr7:149726569  | ZNF775  | UTR3        |                                                                                      | + | TtoG | 0.1667 | 0.1667 | 4 | 2 | [12,12] |
| chr7:148764694  | ZNF777  | coding_exon | ENST00000247930:MtoR;ENST00000314683:MtoR;ENST00000440594:MtoR;                      | - | TtoG | 0.1    | 0.1    | 2 | 2 | [10,10] |
| chr19:45279616  | ZNF780A | coding_exon | ENST00000340963:EtoG;ENST00000392041:EtoG;ENST00000414720:EtoG;ENST00000434415:LtoQ; | - | AtoG | 0.1    | 0.1111 | 3 | 2 | [10,10] |
| chr7:148594886  | ZNF783  | coding_exon | ENST00000434415:LtoQ;                                                                | + | TtoA | 0.1818 | 0.5    | 5 | 5 | [10,13] |
| chr7:148594881  | ZNF783  | coding_exon |                                                                                      | + | TtoC | 0.1667 | 0.3077 | 3 | 3 | [12,14] |
| chr7:148612383  | ZNF783  | UTR3        |                                                                                      | + | AtoG | 0.1    | 0.1    | 3 | 2 | [10,11] |
| chr16:30504056  | ZNF785  | coding_exon | ENST00000321694:KtoN;ENST00000395216:KtoN;ENST00000395222:KtoN;ENST00000395222:KtoN; | - | AtoT | 0.1    | 0.1    | 2 | 2 | [10,10] |
| chr7:98929859   | ZNF789  | coding_exon |                                                                                      | + | CtoT | 0.6667 | 0.6818 | 2 | 2 | [15,22] |
| chr7:98930031   | ZNF789  | coding_exon |                                                                                      | + | CtoT | 0.1    | 0.1    | 2 | 2 | [10,10] |
| chr19:58147881  | ZNF816A | coding_exon | ENST00000357666:NtoI;ENST00000444460:NtoI;                                           | - | AtoT | 0.1111 | 0.1818 | 2 | 2 | [11,18] |
| chr19:58147854  | ZNF816A | coding_exon | ENST00000357666:AtoD;ENST00000444460:AtoD;                                           | - | CtoA | 0.1    | 0.1    | 4 | 2 | [10,10] |
| chr19:58147853  | ZNF816A | coding_exon |                                                                                      | - | TtoC | 0.1    | 0.5455 | 4 | 4 | [10,13] |
| chr4:146902053  | ZNF827  | UTR3        |                                                                                      | - | CtoA | 0.1    | 0.1    | 2 | 2 | [10,10] |
| chr17:30313808  | ZNF830  | coding_exon |                                                                                      | + | AtoG | 0.1333 | 0.2    | 2 | 2 | [10,15] |
| chr14:101871819 | ZNF839  | mixed       |                                                                                      | + | TtoC | 0.1    | 0.4    | 2 | 2 | [10,10] |
| chr20:47297337  | ZNFX1   | coding_exon |                                                                                      | - | TtoC | 0.1111 | 0.1538 | 4 | 2 | [13,27] |
| chr20:47320856  | ZNFX1   | coding_exon |                                                                                      | - | TtoA | 0.1    | 0.1    | 3 | 2 | [10,10] |
| chr20:47296589  | ZNFX1   | mixed       |                                                                                      | - | TtoC | 0.1    | 0.1111 | 5 | 3 | [10,18] |
| chr7:100648182  | ZNHIT1  | UTR5        |                                                                                      | + | AtoT | 0.1818 | 0.2    | 3 | 2 | [10,11] |
| chr17:31916665  | ZNHIT3  | coding_exon |                                                                                      | + | GtoT | 0.1081 | 0.1333 | 3 | 2 | [15,37] |
| chr17:31922792  | ZNHIT3  | coding_exon |                                                                                      | + | TtoC | 0.1111 | 0.1304 | 9 | 3 | [17,23] |
| chr17:31925556  | ZNHIT3  | UTR3        |                                                                                      | + | AtoG | 0.1071 | 0.1212 | 9 | 2 | [28,34] |
| chr10:126660276 | ZRANB1  | coding_exon | ENST00000359653:TtoR;                                                                | + | CtoG | 0.1    | 0.1    | 2 | 2 | [10,10] |
| chr10:126652861 | ZRANB1  | coding_exon | ENST00000359653:LtoQ;                                                                | + | TtoA | 0.1    | 0.1    | 2 | 2 | [10,10] |
| chr10:126664498 | ZRANB1  | UTR3        |                                                                                      | + | AtoG | 0.1    | 0.1    | 3 | 2 | [10,10] |
| chr1:71310809   | ZRANB2  | coding_exon |                                                                                      | - | TtoC | 0.1    | 0.1429 | 5 | 2 | [14,20] |
| chr1:71302642   | ZRANB2  | UTR3        |                                                                                      | - | TtoC | 0.1    | 0.1    | 4 | 2 | [10,20] |
| chr1:71303151   | ZRANB2  | UTR3        |                                                                                      | - | AtoG | 0.2    | 0.2857 | 3 | 2 | [10,14] |
| chr15:41438514  | ZSCAN29 | UTR3        |                                                                                      | - | AtoG | 0.1    | 0.1429 | 3 | 2 | [10,14] |
| chr17:15822112  | ZSWIM7  | coding_exon |                                                                                      | - | TtoC | 0.1    | 0.1    | 2 | 2 | [10,10] |
| chr15:64612378  | ZWILCH  | coding_exon |                                                                                      | + | TtoC | 0.2    | 0.3    | 2 | 2 | [10,10] |
| chr15:64627743  | ZWILCH  | UTR3        |                                                                                      | + | CtoG | 0.1    | 0.125  | 2 | 2 | [10,16] |
| chr10:57787465  | ZWINT   | UTR3        |                                                                                      | - | TtoA | 0.1034 | 0.1429 | 6 | 4 | [19,34] |
| chr10:57787551  | ZWINT   | UTR3        |                                                                                      | - | GtoC | 0.1429 | 0.3333 | 6 | 5 | [32,46] |
| chr3:127663592  | ZXDC    | coding_exon | ENST00000336332:StoP;ENST00000389709:StoP;ENST00000435595:StoP;                      | - | TtoC | 0.1    | 0.125  | 4 | 3 | [10,17] |
| chr1:53131485   | ZYG11A  | UTR3        |                                                                                      | + | TtoG | 0.1    | 0.1    | 3 | 2 | [10,10] |
| chr17:3904101   | ZZEF1   | coding_exon |                                                                                      | - | AtoG | 0.1    | 0.1    | 2 | 2 | [10,10] |
| chr17:3908117   | ZZEF1   | coding_exon |                                                                                      | - | CtoA | 0.1    | 0.1    | 2 | 2 | [10,10] |
| chr1:77814393   | ZZZ3    | coding_exon | ENST00000370798:DtoA;ENST00000370801:DtoA;ENST00000420374:DtoA;                      | - | AtoC | 0.1    | 0.1    | 2 | 2 | [10,10] |

## References and Notes

1. R. T. Libby, J. A. Gallant, The role of RNA polymerase in transcriptional fidelity. *Mol. Microbiol.* **5**, 999 (1991).
2. J. F. Sydow, P. Cramer, RNA polymerase fidelity and transcriptional proofreading. *Curr. Opin. Struct. Biol.* **19**, 732 (2009).
3. S. H. Chen *et al.*, Apolipoprotein B-48 is the product of a messenger RNA with an organ-specific in-frame stop codon. *Science* **238**, 363 (1987).
4. L. M. Powell *et al.*, A novel form of tissue-specific RNA processing produces apolipoprotein-B48 in intestine. *Cell* **50**, 831 (1987).
5. B. L. Bass, H. Weintraub, An unwinding activity that covalently modifies its double-stranded RNA substrate. *Cell* **55**, 1089 (1988).
6. J. B. Li *et al.*, Genome-wide identification of human RNA editing sites by parallel DNA capturing and sequencing. *Science* **324**, 1210 (2009).
7. A. Athanasiadis, A. Rich, S. Maas, Widespread A-to-I RNA editing of Alu-containing mRNAs in the human transcriptome. *PLoS Biol.* **2**, e391 (2004).
8. M. J. Thomas, A. A. Platas, D. K. Hawley, Transcriptional fidelity and proofreading by RNA polymerase II. *Cell* **93**, 627 (1998).
9. D. Wang *et al.*, Structural basis of transcription: Backtracked RNA polymerase II at 3.4 angstrom resolution. *Science* **324**, 1203 (2009).
10. N. Zenkin, Y. Yuzenkova, K. Severinov, Transcript-assisted transcriptional proofreading. *Science* **313**, 518 (2006).
11. M. Sakurai, T. Yano, H. Kawabata, H. Ueda, T. Suzuki, Inosine cyanoethylation identifies A-to-I RNA editing sites in the human transcriptome. *Nat. Chem. Biol.* **6**, 733 (2010).
12. K. Nishikura, Functions and regulation of RNA editing by ADAR deaminases. *Annu. Rev. Biochem.* **79**, 321 (2010).
13. E. Y. Levanon *et al.*, Systematic identification of abundant A-to-I editing sites in the human transcriptome. *Nat. Biotechnol.* **22**, 1001 (2004).
14. S. G. Conticello, The AID/APOBEC family of nucleic acid mutators. *Genome Biol.* **9**, 229 (2008).
15. A. Chester, J. Scott, S. Anant, N. Navaratnam, RNA editing: Cytidine to uridine conversion in apolipoprotein B mRNA. *Biochim. Biophys. Acta-Gene Struct. Expression* **1494**, 1 (2000).
16. J. Dausset *et al.*, Centre d'etude du polymorphisme humain (CEPH): Collaborative genetic mapping of the human genome. *Genomics* **6**, 575 (1990).
17. International HapMap Consortium, The International HapMap Project. *Nature* **426**, 789 (2003).
18. International HapMap Consortium, A haplotype map of the human genome. *Nature* **437**, 1299 (2005).

19. The 1000 Genomes Project Consortium, A map of human genome variation from population-scale sequencing. *Nature* **467**, 1061 (2010).
20. H. M. Cann, CEPH maps. *Curr. Opin. Genet. Dev.* **2**, 393 (1992).
21. T. C. Matise *et al.*, A 3.9-centimorgan-resolution human single-nucleotide polymorphism linkage map and screening set. *Am. J. Hum. Genet.* **73**, 271 (2003).
22. F. Sanger, S. Nicklen, A. R. Coulson, DNA sequencing with chain-terminating inhibitors. *Proc. Natl. Acad. Sci. U.S.A.* **74**, 5463 (1977).
23. D. R. Bentley *et al.*, Accurate whole human genome sequencing using reversible terminator chemistry. *Nature* **456**, 53 (2008).
24. J. Harrow *et al.*, *Genome Biol.* **7** (suppl. 1), S4 (2006).
25. Supporting material is available on *Science Online*.
26. S. B. Montgomery *et al.*, Transcriptome genetics using second generation sequencing in a Caucasian population. *Nature* **464**, 773 (2010).
27. C. Trapnell *et al.*, Transcript assembly and quantification by RNA-Seq reveals unannotated transcripts and isoform switching during cell differentiation. *Nat. Biotechnol.* **28**, 511 (2010).
28. B. R. Rosenberg, C. E. Hamilton, M. M. Mwangi, S. Dewell, F. N. Papavasiliou, Transcriptome-wide sequencing reveals numerous APOBEC1 mRNA-editing targets in transcript 3' UTRs. *Nat. Struct. Mol. Biol.* **18**, 230 (2011).
29. S. F. Altschul, W. Gish, W. Miller, E. W. Myers, D. J. Lipman, Basic local alignment search tool. *J. Mol. Biol.* **215**, 403 (1990).
30. K. L. Sodek *et al.*, Identification of pathways associated with invasive behavior by ovarian cancer cells using multidimensional protein identification technology (MudPIT). *Mol. Biosyst.* **4**, 762 (2008).
31. A. Michalski, J. Cox, M. Mann, More than 100,000 detectable peptide species elute in single shotgun proteomics runs but the majority is inaccessible to data-dependent LC-MS/MS. *J. Proteome Res.* **10**, 1785 (2011).
32. L. M. de Godoy *et al.*, Status of complete proteome analysis by mass spectrometry: SILAC labeled yeast as a model system. *Genome Biol.* **7**, R50 (2006).
33. C. M. Burns *et al.*, Regulation of serotonin-2C receptor G-protein coupling by RNA editing. *Nature* **387**, 303 (1997).
34. H. Lomeli *et al.*, Control of kinetic properties of AMPA receptor channels by nuclear RNA editing. *Science* **266**, 1709 (1994).
35. S. Maas, S. Patt, M. Schrey, A. Rich, Underediting of glutamate receptor GluR-B mRNA in malignant gliomas. *Proc. Natl. Acad. Sci. U.S.A.* **98**, 14687 (2001).
36. C. G. Phreaner, M. A. Williams, R. M. Mulligan, Incomplete editing of rps12 transcripts results in the synthesis of polymorphic polypeptides in plant mitochondria. *Plant Cell* **8**, 107 (1996).

37. H. A. Hundley, A. A. Krauchuk, B. L. Bass, *C. elegans* and *H. sapiens* mRNAs with edited 3' UTRs are present on polysomes. *RNA* **14**, 2050 (2008).
38. S. M. Rueter, C. M. Burns, S. A. Coode, P. Mookherjee, R. B. Emeson, Glutamate receptor RNA editing in vitro by enzymatic conversion of adenosine to inosine. *Science* **267**, 1491 (1995).
39. S. M. Rueter, T. R. Dawson, R. B. Emeson, Regulation of alternative splicing by RNA editing. *Nature* **399**, 75 (1999).
40. B. Langmead, C. Trapnell, M. Pop, S. L. Salzberg, Ultrafast and memory-efficient alignment of short DNA sequences to the human genome. *Genome Biol.* **10**, R25 (2009).
41. D. N. Perkins, D. J. Pappin, D. M. Creasy, J. S. Cottrell, Probability-based protein identification by searching sequence databases using mass spectrometry data. *Electrophoresis* **20**, 3551 (1999).
42. J. E. Elias, W. Haas, B. K. Faherty, S. P. Gygi, Comparative evaluation of mass spectrometry platforms used in large-scale proteomics investigations. *Nat. Methods* **2**, 667 (2005).
43. E. W. Deutsch *et al.*, A guided tour of the Trans-Proteomic Pipeline. *Proteomics* **10**, 1150 (2010).
44. L. A. Beer, H. Y. Tang, S. Sriswasdi, K. T. Barnhart, D. W. Speicher, Systematic discovery of ectopic pregnancy serum biomarkers using 3-D protein profiling coupled with label-free quantitation. *J. Proteome Res.* **10**, 1126 (2010).
